# Supplementary material for: LncRNAs Expression Signatures of Renal Clear Cell Carcinoma Revealed by Microarray
Source: PLoS One. 2012 Aug 6;7(8):e42377. doi: 10.1371/journal.pone.0042377 (PMC3412851; doi:10.1371/journal.pone.0042377)
Supplement: Table S1 — Differentially Expressed LncRNAs. (XLS) [file pone.0042377.s001.xls]

## Sheet: 103T vs 103N_up
# Fold Change cut-off: 2.0 # Condition pairs: 103T vs 103N # Column A: ProbeName, it represents probe name. # Column B: Fold change, positive value indicates up-regulation and negative value indicates down-regulation. # Column C: Log Fold change, log2 value of absolute fold change. Positive value indicates up-regulation and negative value indicates down-regulation. # Column D: Absolute Fold chang…
103T vs 103N 2.0 fold up regulated LncRNAs
	Fold Change and Regulation				Raw Intensities		Normalized Intensities		Annotations
ProbeName	Fold change([103T] vs [103N])	Log Fold change([103T] vs [103N])	Absolute Fold change([103T] vs [103N])	Regulation([103T] vs [103N])	[103N](raw)	[103T](raw)	[103N](normalized)	[103T](normalized)	type	seqname	GeneSymbol	source	RNAlength	chrom	strand	txStart	txEnd	Xhyb	probeSeq	relationship	Associated_gene_acc	Associated_gene_name	Associated_protein_name	Associated_gene_strand	Associated_gene_start	Associated_gene_end
ASHG19A3A014810	5.69644	2.51006	5.69644	up	86.4416	447.411	6.32842	8.83848	noncoding	ENST00000399556	AC010746.4	Ensembl	865	chr2	-	198244424	198245616	NM_199185,NM_002520,NM_001037738,ENST00000434232,ENST00000428039,ENST00000393516,	GGACAAGAATCCTTCAAAAAACAGGAAAAAACTCCTAAAACACCTAAAAGGACCTAGTTC	intergenic
ASHG19A3A046989	2.8006	1.48574	2.8006	up	1475.6	3757.47	10.4003	11.886	noncoding	uc001pqf.2	PAFAH1B2	UCSC_knowngene	2506	chr11	+	117039253	117041759	NM_002572,	CATTGGAAGTTTGTGATTTTGCTTTGGCAAAGTTTCATTGACTAGTAGAACTCATTCTGT	intron sense-overlapping	NM_001184746	PAFAH1B2	platelet-activating factor acetylhydrolase IB	+	117014999	117047131
ASHG19A3A046989	2.8006	1.48574	2.8006	up	1475.6	3757.47	10.4003	11.886	noncoding	uc001pqf.2	PAFAH1B2	UCSC_knowngene	2506	chr11	+	117039253	117041759	NM_002572,	CATTGGAAGTTTGTGATTTTGCTTTGGCAAAGTTTCATTGACTAGTAGAACTCATTCTGT	intron sense-overlapping	NM_001184748	PAFAH1B2	platelet-activating factor acetylhydrolase IB	+	117014999	117047592
ASHG19A3A046989	2.8006	1.48574	2.8006	up	1475.6	3757.47	10.4003	11.886	noncoding	uc001pqf.2	PAFAH1B2	UCSC_knowngene	2506	chr11	+	117039253	117041759	NM_002572,	CATTGGAAGTTTGTGATTTTGCTTTGGCAAAGTTTCATTGACTAGTAGAACTCATTCTGT	exon sense-overlapping	NM_002572	PAFAH1B2	platelet-activating factor acetylhydrolase IB	+	117014999	117041761
ASHG19A3A046989	2.8006	1.48574	2.8006	up	1475.6	3757.47	10.4003	11.886	noncoding	uc001pqf.2	PAFAH1B2	UCSC_knowngene	2506	chr11	+	117039253	117041759	NM_002572,	CATTGGAAGTTTGTGATTTTGCTTTGGCAAAGTTTCATTGACTAGTAGAACTCATTCTGT	intron sense-overlapping	NM_001184747	PAFAH1B2	platelet-activating factor acetylhydrolase IB	+	117014999	117047131
ASHG19A3A021553	3.74104	1.90344	3.74104	up	2752.17	10273.9	11.3107	13.2141	noncoding	ENST00000472521	RPS15AP16	Ensembl	361	chr3	-	128517683	128518044		TGGCATCATGGACCATGAAGAAAGAGATGAAAATACAGGAGGGAAAATCCTGGGATTCTT	intronic antisense	NM_004637	RAB7A	ras-related protein Rab-7a	+	128444978	128533641
ASHG19A3A024407	2.69772	1.43174	2.69772	up	170.698	415.74	7.30376	8.7355	noncoding	ENST00000503202	RP11-127B20.1	Ensembl	879	chr4	-	83322730	83323609		TAAAGATCCCGAGAGAAAGAGACTCTTCAGGAGGCATCAACTTCTAACTCATCTCACCAG	intergenic
ASHG19A3A042599	3.29998	1.72246	3.29998	up	1146.08	3416.16	10.0311	11.7535	noncoding	uc001iwf.2	EPC1	UCSC_knowngene	919	chr10	-	32556714	32557633		GGCATACATTATCCTTAAGGTTTTTAATCCCACCTGGAAAAATTGTGATAGAATTCTCAC	intergenic
ASHG19A3A009156	2.45045	1.29305	2.45045	up	89.0028	204.182	6.3678	7.66085	noncoding	NR_002211	MEIS3P1	RefSeq_NR	2872	chr17	+	15690163	15693017		GGTAGGCAAAGAAACAAGTCTGGTTATTTATGTAAAAACTAGTCTAATAAAGTGAGTGGC	intergenic
ASHG19A3A034043	2.6998	1.43285	2.6998	up	69.7063	178.57	6.00922	7.44207	noncoding	ENST00000439823	AC002480.4	Ensembl	557	chr7	+	22629323	22631241		CAGTTCCTATGATATGACTACCTCAGGGCAAGAAAGTCACTGTGTCCCTGCTACAACAAA	intergenic
ASHG19A3A028651	3.96869	1.98866	3.96869	up	54.9506	203.42	5.66673	7.6554	noncoding	G43610		misc_RNA	101	chr5	+	114856635	114856736		TTATTAGCTGGCATCCGAATACAGTACTTCTTTTGAAAAAATACACAATGGGAACTGACA	natural antisense	NM_020177	FEM1C	protein fem-1 homolog C	-	114856607	114880591
ASHG19A3A022140	2.4409	1.28741	2.4409	up	796.89	1707.72	9.50822	10.7956	noncoding	uc003fwf.1	AF088041	UCSC_knowngene	3546	chr3	-	195961239	195964785		TGTTCTGAGTTATTTTGGATTTTGTTCTTTAGCCAAATAAAGGCAGTGTGGTTTTACCTG	intergenic
ASHG19A3A050435	3.21205	1.6835	3.21205	up	37.784	119.128	5.12473	6.80823	noncoding	ENST00000400214	RP11-397O8.3	Ensembl	611	chr13	+	102454227	102454838		AAGGACGTTGCTGACAGTAAGTGTAAAGGAGAGTTTGATGGCTCAAAGCACCCCACTAAA	intronic antisense	NM_175929	FGF14	fibroblast growth factor 14 isoform 1B	-	102373204	103054124
ASHG19A3A050435	3.21205	1.6835	3.21205	up	37.784	119.128	5.12473	6.80823	noncoding	ENST00000400214	RP11-397O8.3	Ensembl	611	chr13	+	102454227	102454838		AAGGACGTTGCTGACAGTAAGTGTAAAGGAGAGTTTGATGGCTCAAAGCACCCCACTAAA	intronic antisense	NM_004115	FGF14	fibroblast growth factor 14 isoform 1A	-	102373204	102568995
ASHG19A3A050965	2.12824	1.08966	2.12824	up	5735.9	12989.9	12.4046	13.4943	noncoding	ENST00000315233	RP5-919J22.1	Ensembl	879	chr14	-	74844425	74845306	uc002gvw.2,	GGCCGGGGCCAAGGCTGCGGAGCTCGCGGAGGCAAGGCCGAGGATAAGGAGTGGATGCCG	intergenic
ASHG19A3A049250	2.54271	1.34637	2.54271	up	172.143	394.765	7.31863	8.665	noncoding	ENST00000422828	RP11-408E5.7	Ensembl	798	chr13	-	19775776	19801574	NR_003272,NM_001042414,	AACTGGAGGCAGAAATGGAAGCAGCTAGGCATGAACACCAATTAATGCTAATGAGGCAAG	intergenic
ASHG19A3A051446	2.50859	1.32688	2.50859	up	1270.83	2833.8	10.1805	11.5073	noncoding	ENST00000254302	UBE2L7P	Ensembl	465	chr14	+	55695934	55696399	NR_028437,NM_003347,ENST00000436446,	AGTAATTAGTGCTGAAAACTGGAAGCCAGCAACCAAAACCGACCAAGTAATCCAGTCCCT	intergenic
ASHG19A3A017089	2.07336	1.05197	2.07336	up	115.378	222.643	6.74024	7.79221	noncoding	ENST00000452720	AC104634.3	Ensembl	462	chr2	+	232424613	232425075		TAAGAAAGGTGATATTGTGGACACCAAGGGAACGGTACTGTTCAAAAAGGAATGCCCCAC	intergenic
ASHG19A3A040083	3.64756	1.86693	3.64756	up	179.883	583.774	7.3801	9.24704	noncoding	uc004ebr.1	AK057701	UCSC_knowngene	2597	chrX	-	73498208	73512435		ATCCCACTTGACAGTTTAGAAGTGGATTGATAATACTCTTCTGGCTTAAAACCCTTCTTC	intergenic
ASHG19A3A048291	3.11454	1.63902	3.11454	up	252.31	680.075	7.84783	9.48685	noncoding	NR_002803	RPL13P5	RefSeq_NR	634	chr12	+	6993144	6993766	ENST00000412023,	GTCATCGCTGACTAGGAGGAAAACTTCCAGGCCTTGTTAGTCTCTGTATGGCCCATGCAA	intergenic
ASHG19A3A025480	2.52088	1.33393	2.52088	up	258.54	573.016	7.88541	9.21934	noncoding	NR_026989	LOC339524	RefSeq_NR	1419	chr1	+	87595447	87634884		CACGACTCAAAGAAAATGTGAATAAAAGGCATCTTTGTTTCCCAGTCAAATTAGCTGATT	intergenic
ASHG19A3A055087	2.76138	1.46539	2.76138	up	367.885	877.273	8.39793	9.86332	noncoding	uc001kct.2	BC051760	UCSC_knowngene	1855	chr10	-	85926985	85931832		ggcacttggagtccggacatctacaacttggcccaaccaccgagaccacccttaaacatc	intergenic
ASHG19A3A010188	2.53572	1.34239	2.53572	up	495.402	1074.8	8.82035	10.1627	noncoding	ENST00000473808	RP11-254G11.1	Ensembl	480	chr18	-	18699142	18699622	ENST00000490908,	AATGATCAGAAAAAGAAAGAAGCCAAAGAGAAAGGCACCTGGGTTCAACTGAAGCCCCAG	intergenic
ASHG19A3A051572	2.01256	1.00903	2.01256	up	257.839	463.052	7.88059	8.88962	noncoding	NR_027046	LOC145474	RefSeq_NR	1859	chr14	+	71954577	71956418		ATATATTCTTCAGTGTGATTTAGGTGAGTCAGGAATTTTTCCTCTGGAGACTGCCTAAAT	intergenic
ASHG19A3L0000808	2.45484	1.29563	2.45484	up	1068.01	2321.16	9.93594	11.2316	noncoding	AK226132	lincRNA-ZFP106	lincRNA	5684	chr15	-	42707320	42783303	NM_022473,	TTTTCCAGGAAAGGCTCCAGTGGTTCTTACTTGATCCAAAAAATGTCAAGAATTAATCTA	exon sense-overlapping	NM_022473	ZFP106	zinc finger protein 106 homolog	-	42705020	42749730
ASHG19A3A050190	2.2077	1.14254	2.2077	up	438.724	834.048	8.64142	9.78397	noncoding	ENST00000495613	RP11-480P3.1	Ensembl	1093	chr13	+	50746224	50747317	NR_002183,NM_003932,ENST00000508958,	CCTAGGGCACAGAAAATTGCAGAACATCAGAGAAAGTATGAGCGAAAACGTGAAGAGTGA	intergenic
ASHG19A3A039741	2.28317	1.19104	2.28317	up	5396.55	13087.1	12.3217	13.5127	noncoding	ENST00000449334	RP11-348H3.2	Ensembl	478	chr1	+	212997368	212997846		ATAACATTTCCCTGCAGGATTACATTGCAGTGAAGAAGTATGCCAAGCACCTGCCTCACA	intergenic
ASHG19A3A010531	2.56819	1.36075	2.56819	up	331.416	740.677	8.25232	9.61307	noncoding	ENST00000423510	RP11-164O23.5	Ensembl	105	chr1	-	207323521	207323626	NM_006947,	GAAAAAGAAGAAAGGTGGAAAAGGTGGTTGGTGATGAGAATATTCTTGTTGCAGGCTGTT	intergenic
ASHG19A3A016564	2.56619	1.35963	2.56619	up	853.542	1904.21	9.60796	10.9676	noncoding	AK124958		misc_RNA	1922	chr2	+	170495991	170497913		GTGGAAGGAAAAAACATAAATGAAGTTAATGCACTTCTTTTCCTAGCCCAAAAGTCACTG	intergenic
ASHG19A3A019800	3.2599	1.70483	3.2599	up	91.7761	276.493	6.41212	8.11694	noncoding	NR_002821	LOC400927	RefSeq_NR	494	chr22	-	38740669	38794931		CTGCACCTGAGTACAGCACCCAGGCGTCTTCTGCAGCCCACAGAAGGTTCAGCTTAGGGC	intergenic
ASHG19A3A052906	2.07469	1.0529	2.07469	up	2905.3	5654.02	11.3891	12.442	noncoding	ENST00000399198	RP11-209K10.1	Ensembl	888	chr15	+	53176695	53178670	ENST00000445182,	TGAAAAAGAAAAGCAGGCTGCTGTTGAAAAGGCTGTGACCAAGGAGGAATTTCAGGGTGA	intergenic
ASHG19A3A012854	3.54635	1.82634	3.54635	up	595.572	1846.81	9.09168	10.918	noncoding	uc002pik.2	BC033836	UCSC_knowngene	1943	chr19	+	48758945	48761444		CCGCCCAAGAATGATTGTTAATTTCCGTCCATCATTTTCCTTTGATTGTTCTTCATCTCG	natural antisense	NM_001184904	CARD8	caspase recruitment domain-containing protein 8	-	48741517	48759203
ASHG19A3A012854	3.54635	1.82634	3.54635	up	595.572	1846.81	9.09168	10.918	noncoding	uc002pik.2	BC033836	UCSC_knowngene	1943	chr19	+	48758945	48761444		CCGCCCAAGAATGATTGTTAATTTCCGTCCATCATTTTCCTTTGATTGTTCTTCATCTCG	natural antisense	NM_001184902	CARD8	caspase recruitment domain-containing protein 8	-	48711342	48759203
ASHG19A3H0000202	4.33647	2.11652	4.33647	up	95.2292	374.632	6.46525	8.58177	noncoding	nc-HOXD9-16-	nc-HOXD9-16	HOX cluster	558	chr2	+	176984428	176984986	NM_002148,	ATTAAGAAAACCCACAAGTTGGAGGGAGGGGGACTTAAAAAGCACATTACAATGTATCTT	exon sense-overlapping	NM_002148	HOXD10	homeobox protein Hox-D10	+	176981491	176984670
ASHG19A3A051762	2.05342	1.03803	2.05342	up	8487.28	20835.7	12.9933	14.0313	noncoding	ENST00000448875	AL162151.3	Ensembl	158	chr14	+	99439650	99439808	NM_001033853,NM_000967,ENST00000417878,ENST00000413027,ENST00000396745,	TAAGGATGACCCGTCCAAGCCGGTCCACCTCACAGCCTTCCTGGGATACAAGGCTGGCAT	intergenic
ASHG19A3H0000094	2.31888	1.21343	2.31888	up	7272.31	19282.8	12.7399	13.9533	noncoding	nc-HOXB9-193-	nc-HOXB9-193	HOX cluster	858	chr17	-	46768301	46769159	ENST00000461606,	CAGAAAATGTTGACATTACTCTGAAGGGATGCACAGTTATTGTGAAGGGCCCCAGAGGAA	intergenic
ASHG19A3A054851	2.10462	1.07356	2.10462	up	551.082	994.932	8.9756	10.0492	noncoding	uc002fih.2	AK057887	UCSC_knowngene	3732	chr16	+	84696933	84700665		TTTAACATGAACAGAATGTGTGGTTCTGAAGGTGTGTGGGGGTCTCAAGAAATTGTCCTT	intergenic
ASHG19A3A008459	3.45978	1.79068	3.45978	up	80.9096	259.249	6.23129	8.02197	noncoding	BC018035		NRED	458	chr17	-	43921245	43972139		GGCGAGGACGGGAGAGGACAGCGGAGGAGGAGAAGGTGGCTGTGGTGGCGGCGGCAGAAG	natural antisense	NM_001203251	MAPT	microtubule-associated protein tau isoform 7	+	43971747	44105699
ASHG19A3A008459	3.45978	1.79068	3.45978	up	80.9096	259.249	6.23129	8.02197	noncoding	BC018035		NRED	458	chr17	-	43921245	43972139		GGCGAGGACGGGAGAGGACAGCGGAGGAGGAGAAGGTGGCTGTGGTGGCGGCGGCAGAAG	natural antisense	NM_005910	MAPT	microtubule-associated protein tau isoform 2	+	43971747	44105699
ASHG19A3A008459	3.45978	1.79068	3.45978	up	80.9096	259.249	6.23129	8.02197	noncoding	BC018035		NRED	458	chr17	-	43921245	43972139		GGCGAGGACGGGAGAGGACAGCGGAGGAGGAGAAGGTGGCTGTGGTGGCGGCGGCAGAAG	natural antisense	NM_016841	MAPT	microtubule-associated protein tau isoform 4	+	43971747	44105699
ASHG19A3A008459	3.45978	1.79068	3.45978	up	80.9096	259.249	6.23129	8.02197	noncoding	BC018035		NRED	458	chr17	-	43921245	43972139		GGCGAGGACGGGAGAGGACAGCGGAGGAGGAGAAGGTGGCTGTGGTGGCGGCGGCAGAAG	natural antisense	NM_016835	MAPT	microtubule-associated protein tau isoform 1	+	43971747	44105699
ASHG19A3A008459	3.45978	1.79068	3.45978	up	80.9096	259.249	6.23129	8.02197	noncoding	BC018035		NRED	458	chr17	-	43921245	43972139		GGCGAGGACGGGAGAGGACAGCGGAGGAGGAGAAGGTGGCTGTGGTGGCGGCGGCAGAAG	natural antisense	NM_001203252	MAPT	microtubule-associated protein tau isoform 8	+	43971747	44105699
ASHG19A3A008459	3.45978	1.79068	3.45978	up	80.9096	259.249	6.23129	8.02197	noncoding	BC018035		NRED	458	chr17	-	43921245	43972139		GGCGAGGACGGGAGAGGACAGCGGAGGAGGAGAAGGTGGCTGTGGTGGCGGCGGCAGAAG	natural antisense	NM_001123066	MAPT	microtubule-associated protein tau isoform 6	+	43971747	44105699
ASHG19A3A008459	3.45978	1.79068	3.45978	up	80.9096	259.249	6.23129	8.02197	noncoding	BC018035		NRED	458	chr17	-	43921245	43972139		GGCGAGGACGGGAGAGGACAGCGGAGGAGGAGAAGGTGGCTGTGGTGGCGGCGGCAGAAG	natural antisense	NM_016834	MAPT	microtubule-associated protein tau isoform 3	+	43971747	44105699
ASHG19A3A008459	3.45978	1.79068	3.45978	up	80.9096	259.249	6.23129	8.02197	noncoding	BC018035		NRED	458	chr17	-	43921245	43972139		GGCGAGGACGGGAGAGGACAGCGGAGGAGGAGAAGGTGGCTGTGGTGGCGGCGGCAGAAG	natural antisense	NM_001123067	MAPT	microtubule-associated protein tau isoform 5	+	43971747	44105699
ASHG19A3A008459	3.45978	1.79068	3.45978	up	80.9096	259.249	6.23129	8.02197	noncoding	BC018035		NRED	458	chr17	-	43921245	43972139		GGCGAGGACGGGAGAGGACAGCGGAGGAGGAGAAGGTGGCTGTGGTGGCGGCGGCAGAAG	intronic antisense	NM_175882	IMP5	signal peptide peptidase-like 2C precursor	+	43922255	43924438
ASHG19A3A043980	2.40419	1.26555	2.40419	up	2756.27	6177.93	11.313	12.5786	noncoding	AK130049		NRED	2232	chr10	+	60588954	60591182		GATGCAATGAAGGGAATATGACACTACAGTATACAGAGTTGTTGTTATATGATGCACAAA	intergenic
ASHG19A3A007656	5.22021	2.38411	5.22021	up	58.4193	279.603	5.75378	8.13788	noncoding	NR_028412	APOC1P1	RefSeq_NR	939	chr19	+	45430059	45434643		GTGGTTCTGTCGATCGTCTTGGAAGCCAGGCGTTGTGGTGCGCGCTTGGCTACTTGGGAG	intergenic
ASHG19A3A026980	3.58903	1.8436	3.58903	up	133.417	432.388	6.95147	8.79507	noncoding	AK092482		RNAdb	2386	chr5	-	76723251	76725632		GCATGGCACAACATACTGCATGGGCTTACACCCAGAAAATTTGGATTTTAATAAAAATTT	natural antisense	NM_001029854	PDE8B	high affinity cAMP-specific and IBMX-insensitive	+	76506705	76724080
ASHG19A3A026980	3.58903	1.8436	3.58903	up	133.417	432.388	6.95147	8.79507	noncoding	AK092482		RNAdb	2386	chr5	-	76723251	76725632		GCATGGCACAACATACTGCATGGGCTTACACCCAGAAAATTTGGATTTTAATAAAAATTT	natural antisense	NM_001029851	PDE8B	high affinity cAMP-specific and IBMX-insensitive	+	76506705	76724080
ASHG19A3A026980	3.58903	1.8436	3.58903	up	133.417	432.388	6.95147	8.79507	noncoding	AK092482		RNAdb	2386	chr5	-	76723251	76725632		GCATGGCACAACATACTGCATGGGCTTACACCCAGAAAATTTGGATTTTAATAAAAATTT	natural antisense	NM_003719	PDE8B	high affinity cAMP-specific and IBMX-insensitive	+	76506705	76724080
ASHG19A3A026980	3.58903	1.8436	3.58903	up	133.417	432.388	6.95147	8.79507	noncoding	AK092482		RNAdb	2386	chr5	-	76723251	76725632		GCATGGCACAACATACTGCATGGGCTTACACCCAGAAAATTTGGATTTTAATAAAAATTT	natural antisense	NM_001029853	PDE8B	high affinity cAMP-specific and IBMX-insensitive	+	76506705	76724080
ASHG19A3A026980	3.58903	1.8436	3.58903	up	133.417	432.388	6.95147	8.79507	noncoding	AK092482		RNAdb	2386	chr5	-	76723251	76725632		GCATGGCACAACATACTGCATGGGCTTACACCCAGAAAATTTGGATTTTAATAAAAATTT	natural antisense	NM_001029852	PDE8B	high affinity cAMP-specific and IBMX-insensitive	+	76506705	76724080
ASHG19A3A048103	4.67279	2.22428	4.67279	up	1713.28	7417.59	10.6111	12.8354	noncoding	ENST00000495697	RP11-18C24.2	Ensembl	534	chr12	-	121031817	121032351		AACACATCAATCTGGGTATCAAATATGACCCAAGTGTGGGTGTCTATGGCCTGGACTTCT	intergenic
ASHG19A3A000494	4.04327	2.01552	4.04327	up	230.01	805.313	7.71991	9.73544	noncoding	ENST00000512530	AC007497.1	Ensembl	1920	chr16	+	53676109	53678911		ATCCGCCTACTCAGCCTCCGGAGTAGCTGAGGCAGGAGAATTGCTAGAACGTGGGAAGAG	intronic antisense	NM_001127897	RPGRIP1L	protein fantom isoform b	-	53633817	53737771
ASHG19A3A000494	4.04327	2.01552	4.04327	up	230.01	805.313	7.71991	9.73544	noncoding	ENST00000512530	AC007497.1	Ensembl	1920	chr16	+	53676109	53678911		ATCCGCCTACTCAGCCTCCGGAGTAGCTGAGGCAGGAGAATTGCTAGAACGTGGGAAGAG	intronic antisense	NM_015272	RPGRIP1L	protein fantom isoform a	-	53633817	53737771
ASHG19A3A045566	4.2806	2.09781	4.2806	up	312.562	1160.7	8.16729	10.2651	noncoding	AK129753		misc_RNA	2007	chr11	-	86620031	86622038		TGTCCTCTTTTTACTGAAATAGGGGCCCTTGTTGATGGTAGTCACTGCCCATGCTGTTTA	intergenic
ASHG19A3A040151	2.24225	1.16495	2.24225	up	658.987	1280.59	9.23346	10.3984	noncoding	ENST00000456632	RP11-236M5.1	Ensembl	1027	chrX	-	92542731	92543758		TCAACCTAGGGCACAGAAAATTGCAGAACATCGGAGAAAGTATGGGTGAAAAAGTGAAGA	intergenic
ASHG19A3A026458	4.04198	2.01506	4.04198	up	906.056	3308.53	9.69343	11.7085	noncoding	ENST00000412047	RP4-581O6.1	Ensembl	152	chr1	+	100308165	100308317	ENST00000495111,	TGGTAATAAAATCAGGTAGAACTCCAAAAGGAGACATTGGAGAAGAATCAAGCTGGGTCT	intergenic
ASHG19A3A016173	3.70573	1.88976	3.70573	up	1443.11	4975.07	10.3684	12.2582	noncoding	ENST00000401483	AC114776.1	Ensembl	387	chr2	+	111391523	111391910		TACAAATTACGTTCCTTCCAAATTAACCAGGACGAAGAAGAGGAGGAAGACGAGGATTAA	intergenic
ASHG19A3A030715	2.12962	1.0906	2.12962	up	51.0734	107.958	5.56419	6.65479	noncoding	ENST00000405959	RP1-101K10.4	Ensembl	362	chr6	-	153280411	153280773		CAAAAGAGGACAAAAGTCCCCCAGGACATAGAAATGAAGGACCTTGAAGATGAGAGCTAA	intergenic
ASHG19A3A008475	2.10986	1.07715	2.10986	up	407.612	741.068	8.53673	9.61387	noncoding	uc010wkl.1	DQ589083	UCSC_knowngene	1661	chr17	-	45126240	45127901	NR_027418,BC065911,	AACTCTGCTTAGGATTATTTCATTGATCCCCAGGGTCCAATTGCCCAGTGCTCAGTCAAA	intergenic
ASHG19A3A014203	5.35593	2.42114	5.35593	up	1536.84	7742.78	10.461	12.8822	noncoding	NR_015395	LOC541471	RefSeq_NR	809	chr2	-	112124590	112252692		TTATAAATCTTCAATACATCCTGTCCCCCTAAAACGGCATCTGGGTCTTTTGAGGGTTAA	intergenic
ASHG19A3A027674	3.10555	1.63485	3.10555	up	87.1109	250.958	6.33769	7.97253	noncoding	BC062365		misc_RNA	1461	chr5	-	168088744	168090184		AAGTCTGATGCTTCAAAAAGATGAGAAGAAGGGCAAGAAGAGGGATAACTCCCAAGCTCA	intergenic
ASHG19A3A026383	2.53302	1.34086	2.53302	up	656.231	1453.93	9.22716	10.568	noncoding	uc003ixr.2	CR595267	UCSC_knowngene	1013	chr4	+	186346920	186348033		ACCTCTCCTGACGCTCCATCCGTACCTTTTGCAAGGGAACGTGCCATAATTCGGCTATGC	natural antisense	NM_018359	UFSP2	ufm1-specific protease 2	-	186320693	186347139
ASHG19A3A043559	2.7348	1.45143	2.7348	up	393.102	922.062	8.48867	9.94011	noncoding	CR592477		misc_RNA	2305	chr10	+	6019376	6021681		CCTACTGCCTCATCCTGTCAAAACTTAATATGTCTGCTCAATGTTTGCTTCAGATATTTT	natural antisense	NM_002189	IL15RA	interleukin-15 receptor subunit alpha isoform 1	-	5994333	6019574
ASHG19A3A043559	2.7348	1.45143	2.7348	up	393.102	922.062	8.48867	9.94011	noncoding	CR592477		misc_RNA	2305	chr10	+	6019376	6021681		CCTACTGCCTCATCCTGTCAAAACTTAATATGTCTGCTCAATGTTTGCTTCAGATATTTT	natural antisense	NM_172200	IL15RA	interleukin-15 receptor subunit alpha isoform 2	-	5994333	6019574
ASHG19A3A012966	3.48738	1.80214	3.48738	up	3176.21	11339.8	11.5205	13.3226	noncoding	ENST00000477141	CTD-3099C6.4	Ensembl	156	chr19	+	53067328	53067484	ENST00000490784,	AATAAAATCAGGTCCAACTTTAAAAGGAGACATTGGAGAAGAACCAAGCTGGGTCTATAA	intergenic
ASHG19A3A032354	2.35539	1.23596	2.35539	up	37.2389	87.6164	5.10287	6.33883	noncoding	ENST00000420557	C6orf208	Ensembl	2318	chr6	+	170190416	170202969	NR_026780,	ATGCATGTTGCCCACATAGCTCAGCAACAGATGCTCTCACGCTTGTTAAAAGTAAAACCG	intergenic
ASHG19A3A024870	2.01131	1.00813	2.01131	up	18402.7	58786.1	14.2424	15.2505	noncoding	NR_001562	ANXA2P1	RefSeq_NR	1343	chr4	-	154228620	154229963	NR_001446,NM_004039,NM_001136015,NM_001002858,NM_001002857,	GAAACACTTTGCCTCCTGTGTACTGTGTCATAAACGGATTAATAAACTGAATTTGTACTT	intronic antisense	NM_001130067	TRIM2	tripartite motif-containing protein 2 isoform 2	+	154074269	154260474
ASHG19A3A024870	2.01131	1.00813	2.01131	up	18402.7	58786.1	14.2424	15.2505	noncoding	NR_001562	ANXA2P1	RefSeq_NR	1343	chr4	-	154228620	154229963	NR_001446,NM_004039,NM_001136015,NM_001002858,NM_001002857,	GAAACACTTTGCCTCCTGTGTACTGTGTCATAAACGGATTAATAAACTGAATTTGTACTT	intronic antisense	NM_015271	TRIM2	tripartite motif-containing protein 2 isoform 1	+	154125597	154260474
ASHG19A3A027720	3.83447	1.93903	3.83447	up	139.447	481.544	7.01243	8.95145	noncoding	ENST00000515403	RP11-844P9.2	Ensembl	3632	chr5	-	175570087	175612158	uc003mdn.2,	CCTGCCTGTTATGAGGGACAGGTAGGAGAGGATGGGCTTTCCATCAAAACAAACAAAAAA	intergenic
ASHG19A3A048407	2.1834	1.12657	2.1834	up	74.6522	157.315	6.1134	7.23998	noncoding	ENST00000363605	AC007535.2	Ensembl	345	chr12	+	13836475	13836820		TGTATTAGTTGTTATTATTATTACCTATTTTTTACATTGCCTGGGTGTCAGGGGAGTTAG	intronic antisense	NM_000834	GRIN2B	glutamate [NMDA] receptor subunit epsilon-2	-	13714409	14133022
ASHG19A3A029342	4.42323	2.1451	4.42323	up	448.022	1733.87	8.66968	10.8148	noncoding	uc001ejz.1	AF379632	UCSC_knowngene	969	chr1	+	144162000	144167711	uc001erc.3,uc001ekp.3,NM_183372,NM_173638,NM_017940,NM_015383,NM_015383,NM_001170755,NM_001102663,NM_001101663,NM_001039703,NM_001039703,NM_001039703,NM_001039703,NM_001039703,NM_001039703,NM_001039703,NM_001039703,NM_001039703,NM_001039703,NM_001039703,NM_001039703,AX747492,	ATAGATGTTATTCGACTCCTTCAGGTTATCTTGAACTGCCTGACTTAGGCCAGCCCTACA	intergenic
ASHG19A3A024191	2.04843	1.03452	2.04843	up	8378.06	20435	12.9711	14.0056	noncoding	ENST00000484463	RP11-463H12.1	Ensembl	214	chr4	-	55842324	55842538		TCCTTTATACCCTGATCATCACTGACAAAGAGAAGGCAGAGAAACTGAACTAGTCCCTGC	intergenic
ASHG19A3A031608	2.71603	1.4415	2.71603	up	325.694	767.337	8.22758	9.66909	noncoding	ENST00000402892	RP1-142O9.2	Ensembl	195	chr6	+	49241240	49241435		AGTCCTACCTCAGATTCTGCATCTGTACAGAGAGCAGACACCAGCTTAAATGACTGTGAA	intergenic
ASHG19A3A039633	4.30346	2.1055	4.30346	up	387.455	1455.24	8.46449	10.57	noncoding	ENST00000399997	RP11-431J24.4	Ensembl	855	chrX	-	16216550	16217414		ATCTGCTATGTGTTGCAGAAAGGCCATGTACAAGCGGAAGTACTCAGCTGCTAAATCCAA	intergenic
ASHG19A3A043471	2.08377	1.0592	2.08377	up	61.0047	124.72	5.81673	6.87592	noncoding	ENST00000418634	RP13-439H18.7	Ensembl	693	chr10	-	134958115	134958808		TCTGAAAACAAGGAATTTAATGCAGAAGTACACGGAAGGGCATCATGGGCCAGAATGTTG	intergenic
ASHG19A3A010149	3.03801	1.60312	3.03801	up	310.548	821.349	8.15843	9.76155	noncoding	ENST00000399792	AP000902.2	Ensembl	540	chr18	-	9678756	9679297	ENST00000488218,	TTCATGAAGAAGAACCATGAAGAGGAAGTAAAAGGCCTACAAGCCCAGACTGCCAGATCT	intergenic
ASHG19A3A011204	2.50032	1.32211	2.50032	up	2342.19	5459.67	11.0734	12.3955	noncoding	ENST00000469924	CTD-3131K8.1	Ensembl	477	chr19	-	17700403	17700880	NR_026911,NM_000982,ENST00000497298,ENST00000495531,ENST00000494303,ENST00000491435,ENST00000485945,ENST00000482905,ENST00000480465,ENST00000472093,ENST00000471393,ENST00000461458,ENST00000441274,ENST00000422570,ENST00000418441,ENST00000417077,ENST00000416102,ENST00000407436,ENST00000403916,ENST00000401418,ENST00000396599,	AAATGATCAGAAAAAGAAAGAAGCCAAAGAGAAAGGTGCCTGGGTTCAACTGAAGCGCCA	intergenic
ASHG19A3A027020	2.38999	1.257	2.38999	up	414.817	851.543	8.56099	9.81799	noncoding	NR_003665	LOC441089	RefSeq_NR	1362	chr5	-	79646423	79647785	NM_004269,	CTTGTGTTTTGTGGGGCTTGGGGTTTGGTAACTTATTTTTATAAGCAATAAACCTTTTGT	intergenic
ASHG19A3A019456	2.12211	1.0855	2.12211	up	92.0165	185.878	6.41667	7.50216	noncoding	ENST00000481698	AC000095.8	Ensembl	905	chr22	-	19019076	19022077	ENST00000424817,	AATGGACACTGATCCTCAGAACCACCTGGAGATTTGGGAGGCTGGGCTGCTGTTGCCTGT	intergenic
ASHG19A3A048496	9.5332	3.25296	9.5332	up	237.961	1968.97	7.76319	11.0162	noncoding	AL117598		misc_RNA	2367	chr12	+	32534219	32536566		CCAGAAGCCAATATATCGATTCTTATATCTCGGTTTATGTTACCAACTGAATATGGTGTA	intergenic
ASHG19A3A035657	7.48503	2.90401	7.48503	up	83.6194	558.965	6.27817	9.18218	noncoding	BC012900		misc_RNA	2118	chr8	-	29190579	29192682		CATCTTTCAGAGTGATACCATTTCTACATTTGATAATGCCTGTATTCCTGTAGGATGTAT	exon sense-overlapping	NM_001394	DUSP4	dual specificity protein phosphatase 4 isoform	-	29190578	29208267
ASHG19A3A035657	7.48503	2.90401	7.48503	up	83.6194	558.965	6.27817	9.18218	noncoding	BC012900		misc_RNA	2118	chr8	-	29190579	29192682		CATCTTTCAGAGTGATACCATTTCTACATTTGATAATGCCTGTATTCCTGTAGGATGTAT	exon sense-overlapping	NM_057158	DUSP4	dual specificity protein phosphatase 4 isoform	-	29190578	29206322
ASHG19A3A031015	3.10226	1.63332	3.10226	up	2523.11	7263.51	11.1768	12.8101	noncoding	ENST00000397300	RP11-401E14.1	Ensembl	534	chr6	+	15935012	15935548	NM_005719,ENST00000437218,	AAACCCAGCAAGTGGTGGGCTTGCTTTGTGAAGAGACAGTTCATGAACAAGAGTCTTTCA	intergenic
ASHG19A3A039449	3.47145	1.79554	3.47145	up	327.333	979.62	8.23424	10.0298	noncoding	AK021425		misc_RNA	1832	chr1	+	210417766	210419598		GATGGTTTAAACTAGGTGCAGAACTGTCCCATGAAGAGAAGAATGATATCAGTATTTAAA	intergenic
ASHG19A3A031531	2.91506	1.54353	2.91506	up	299.276	756.109	8.10128	9.64481	noncoding	AK096036		misc_RNA	2642	chr6	+	42750664	42753300		ACATACAGGCTTCTAGGTCTAGCCAGGCCATCTAGTTTAGTCAAGACAGCTGTGTAACAA	intergenic
ASHG19A3A029186	5.15323	2.36548	5.15323	up	376.782	1706.99	8.42995	10.7954	noncoding	ENST00000514034	CTC-251I16.1	Ensembl	1154	chr5	+	175136605	175137759		GTGGGACCCCAAATCCATGTTTGTGTTACCATCGTGTTCCAATAAAACTATCGAAACAGA	intergenic
ASHG19A3A051349	2.80011	1.48548	2.80011	up	4698.3	14344.7	12.1424	13.6279	noncoding	ENST00000480072	RP11-829H16.1	Ensembl	201	chr14	+	31288919	31289120		AAGTTTGAAAAGAGGTACAAGACAGGCAAGAACAAGTGGTTCTTCCAGGACCTAGATTTT	intergenic
ASHG19A3A036568	2.70595	1.43613	2.70595	up	121.907	303.312	6.82086	8.25699	noncoding	AK026601		misc_RNA	1700	chr8	+	41685789	41687453		CACTAGGGGAGCTCATTGTCTAAGACTGCCATCCCTAACTGCCTTTTAAAAAGAAATCTG	intronic antisense	NM_001142446	ANK1	ankyrin-1 isoform 9	-	41510743	41754280
ASHG19A3A008649	2.88485	1.5285	2.88485	up	509.386	1270.95	8.86161	10.3901	noncoding	BC040714		misc_RNA	1546	chr17	-	58118818	58120351		GAATCTTGGAACTTCCGTCTCTTGAATACATTCTTAGTAGTAGCTTCTTGGCATTTTCAA	intergenic
ASHG19A3A036612	2.34147	1.22742	2.34147	up	225.117	471.453	7.68931	8.91673	noncoding	ENST00000471393	RP11-400K9.1	Ensembl	478	chr8	+	54445467	54446264		ACAAAGGGAAAGAGGAGAGACACCTGACCCGTGTTCTCTAGGCCTTTTAGAAGACATGGA	intergenic
ASHG19A3A014042	5.57429	2.47879	5.57429	up	254.88	1228.55	7.86381	10.3426	noncoding	uc002sva.1	DKFZp667P0924	UCSC_knowngene	2442	chr2	-	96523056	96610442	NM_025190,NM_025190,NM_001164315,NM_001164315,	AGAAAGTTTCTCTTTTGAATATTGCCACAAGAATAACGGGCGGTGGGAAATCTGGAACAG	intergenic
ASHG19A3A041225	2.75575	1.46244	2.75575	up	7076.91	23136.5	12.701	14.1635	noncoding	ENST00000438336	RP11-475D8.3	Ensembl	660	chrX	+	78018722	78019382		ACCTATTTTGTAGAAGGTGAAGATGCTGGCAACAGGAGGACTAGATCAACAGTTTTATTA	intergenic
ASHG19A3A028654	2.36902	1.24429	2.36902	up	66.4896	151.522	5.94074	7.18503	noncoding	ENST00000508517	AC010226.4	Ensembl	539	chr5	+	114937940	114955975		TTACTGAACATCGGATGAGACCATGGATAGTAAATTGGGAGTGAAGGTCCATACCTGGGT	intronic antisense	NM_001164469	TMED7-TICAM2	TRAM adaptor with GOLD domain isoform 2	-	114914338	114961876
ASHG19A3A028654	2.36902	1.24429	2.36902	up	66.4896	151.522	5.94074	7.18503	noncoding	ENST00000508517	AC010226.4	Ensembl	539	chr5	+	114937940	114955975		TTACTGAACATCGGATGAGACCATGGATAGTAAATTGGGAGTGAAGGTCCATACCTGGGT	intronic antisense	NM_181836	TMED7	transmembrane emp24 domain-containing protein 7	-	114948904	114961876
ASHG19A3A028654	2.36902	1.24429	2.36902	up	66.4896	151.522	5.94074	7.18503	noncoding	ENST00000508517	AC010226.4	Ensembl	539	chr5	+	114937940	114955975		TTACTGAACATCGGATGAGACCATGGATAGTAAATTGGGAGTGAAGGTCCATACCTGGGT	natural antisense	NM_021649	TICAM2	TIR domain-containing adapter molecule 2	-	114914338	114938176
ASHG19A3A028654	2.36902	1.24429	2.36902	up	66.4896	151.522	5.94074	7.18503	noncoding	ENST00000508517	AC010226.4	Ensembl	539	chr5	+	114937940	114955975		TTACTGAACATCGGATGAGACCATGGATAGTAAATTGGGAGTGAAGGTCCATACCTGGGT	intronic antisense	NM_001164468	TMED7-TICAM2	TRAM adaptor with GOLD domain isoform 1	-	114914338	114961876
ASHG19A3A024408	2.75455	1.46182	2.75455	up	1589.66	4007.89	10.5063	11.9681	noncoding	NR_003249	HNRPDL	RefSeq_NR	3615	chr4	-	83344348	83351378	uc.144-,	ATCTCTGGGGGTCGCACGTTGCGGGCAGAGCGCAAGGCATACACCAGAAAACGCTGTCCT	exon sense-overlapping	NM_001207000	HNRPDL	heterogeneous nuclear ribonucleoprotein D-like	-	83343716	83351378
ASHG19A3A024408	2.75455	1.46182	2.75455	up	1589.66	4007.89	10.5063	11.9681	noncoding	NR_003249	HNRPDL	RefSeq_NR	3615	chr4	-	83344348	83351378	uc.144-,	ATCTCTGGGGGTCGCACGTTGCGGGCAGAGCGCAAGGCATACACCAGAAAACGCTGTCCT	exon sense-overlapping	NM_031372	HNRPDL	heterogeneous nuclear ribonucleoprotein D-like	-	83343716	83351378
ASHG19A3A024408	2.75455	1.46182	2.75455	up	1589.66	4007.89	10.5063	11.9681	noncoding	NR_003249	HNRPDL	RefSeq_NR	3615	chr4	-	83344348	83351378	uc.144-,	ATCTCTGGGGGTCGCACGTTGCGGGCAGAGCGCAAGGCATACACCAGAAAACGCTGTCCT	bidirectional	NM_021204	ENOPH1	enolase-phosphatase E1	+	83351725	83382244
ASHG19A3A024374	2.32766	1.21888	2.32766	up	410.227	822.701	8.5461	9.76498	noncoding	ENST00000470927	RP11-1E1.1	Ensembl	724	chr4	-	78003555	78004279	NM_198486,ENST00000423238,	AAGTTTGGTGTCATTTGCTTGGAAGACCTCATTCATGAAACTGCCTTCCCAGGGAAGCAT	intergenic
ASHG19A3A049982	2.15005	1.10437	2.15005	up	486.54	897.283	8.79356	9.89793	noncoding	HIT000192534		H-invDB	288	chr13	+	26979087	26979374		GTGCCCTTACTTCAGCAAAGGAGAAGGAGTAGGAGAGCCTTAGAATTTTTGAGGAAAAAA	intergenic
ASHG19A3A038372	2.29431	1.19806	2.29431	up	480.659	940.384	8.77329	9.97135	noncoding	ENST00000449745	RP11-284P20.2	Ensembl	1735	chr9	+	13986173	13987908	NM_014303,	AAGAAGTGGGAGAAGTACCTGTACCAGAAGATCATGTTTGGCAAGAGGCGAAAAATCCGA	intergenic
ASHG19A3A018537	5.38519	2.429	5.38519	up	103.16	499.309	6.5776	9.0066	noncoding	ENST00000487421	RP11-157P1.5	Ensembl	612	chr20	+	60928068	60931536		CAGCTCAGCTGCCAGTGCTGACCTTTCCGCTGCTACATGGTTCTGTGCAGAAAGAAAAAA	natural antisense	NM_005560	LAMA5	laminin subunit alpha-5 precursor	-	60884120	60942368
ASHG19A3A027680	2.62126	1.39026	2.62126	up	120.876	290.1	6.80497	8.19523	noncoding	AF086367		misc_RNA	630	chr5	-	169673244	169673861		TCATACACTTGCCATTAGTGACGTAAGTTAAGCCATTCTTCAAAACATTAAACAGCCTTC	intergenic
ASHG19A3A032982	5.76555	2.52746	5.76555	up	1728.12	9715.22	10.6228	13.1502	noncoding	AK094163		misc_RNA	2354	chr1	+	158067697	158070051		AACCATTGTAGGTTTTTAGCAATGTGTATCTGTGTGTCCCTCACACCTTTTCCTATTCTA	intergenic
ASHG19A3A054709	2.96891	1.56994	2.96891	up	93.7484	257.664	6.44272	8.01266	noncoding	ENST00000400979	RP11-7G12.2	Ensembl	1969	chr1	-	166244865	166246834		AAAGATTTTCAAGGGAGCAAACTTAAAGTCTCTCTTGCTCGGAAGAGGCCTCCAGTGAAC	intergenic
ASHG19A3A052268	2.03697	1.02643	2.03697	up	470.973	824.306	8.74353	9.76995	noncoding	AK021773		misc_RNA	1839	chr15	-	65244282	65248504		ATAAGAAATTTCAGCTTCTCAGTCCCTCTAGCCAACATTTCAGGTGCATGACAGCCTCAG	intronic antisense	NM_182703	ANKDD1A	ankyrin repeat and death domain-containing	+	65204100	65251041
ASHG19A3A049554	2.34361	1.22873	2.34361	up	50.8688	117.482	5.55753	6.78626	noncoding	ENST00000452288	RP11-165D7.3	Ensembl	413	chr13	-	49144774	49147453		TTTCATTATTTTCCTGAAGAATTACCACTACCCTTTGAGGTGAACCCCTAAGCTGGGATG	intergenic
ASHG19A3A029809	2.05776	1.04107	2.05776	up	718.07	1274.37	9.35289	10.394	noncoding	AK025759		NRED	2209	chr6	-	34250999	34253191		GAGAAAATGATACCTCTCACCTTCAAATTAATCAAATAGTTTGTCCTTCTAGTCCCCTTA	intergenic
ASHG19A3A045075	2.25664	1.17418	2.25664	up	8301.67	22572.9	12.9557	14.1299	noncoding	ENST00000478433	RP5-916O11.1	Ensembl	450	chr11	-	36018775	36019225		ATGTGGCACTGATCTTTAGCCAGAGAACTCTCTGAAACCACTAAAGAGATCCTGGGAACT	intronic antisense	NM_174902	LDLRAD3	low-density lipoprotein receptor class A	+	35965611	36252841
ASHG19A3A015707	2.22714	1.15519	2.22714	up	267.03	524.46	7.92853	9.08372	noncoding	ENST00000414975	RP11-681L4.1	Ensembl	361	chr2	+	62083829	62084190		ACTGTGGTTACCTGTATACCTGTTACCACTTTCAAAAATCTAGATAGTCAGTGTGGATGA	intergenic
ASHG19A3A037781	2.42163	1.27598	2.42163	up	1056.29	2258.87	9.91852	11.1945	noncoding	uc004axb.2	BC070371	UCSC_knowngene	1370	chr9	-	99957619	99958989	NM_024639,	GCCAACCTAAATCTACCTCAGGTAAGTAGTTAGATTAACTTTTTCAAGATTTCAGACCAA	intergenic
ASHG19A3A026035	3.59972	1.84788	3.59972	up	346.658	1073.68	8.31316	10.161	noncoding	ENST00000512403	RP11-614F17.1	Ensembl	343	chr4	+	132689387	132689730	ENST00000446396,ENST00000414918,ENST00000412428,	ATTTTAAGACTTGGTGGCTGAGAAACAACTCATCCTGGATGGCTGTGGGGCTAGATATAG	intergenic
ASHG19A3A048240	3.05659	1.61192	3.05659	up	1058.33	2897.45	9.9219	11.5338	noncoding	ENST00000468701	RP11-476M19.1	Ensembl	347	chr12	+	3578115	3578462		AGCTATATTCCTGTGTGAGTGTGCAATTCACAGCAAAGTAGTCAGGAACAGATCTAGTGA	intergenic
ASHG19A3A022192	3.00975	1.58964	3.00975	up	83.8074	234.524	6.28151	7.87115	noncoding	ENST00000415533	AC090042.1	Ensembl	405	chr3	+	1771753	1772158		GACATATGTTCCATTGACTCCTGCTATGAGGCTTTGGATGTTGCCAACAAAATTGGAATC	intergenic
ASHG19A3A032078	2.03851	1.02751	2.03851	up	70.1845	139.08	6.01927	7.04678	noncoding	ENST00000427807	RP1-248E1.2	Ensembl	1351	chr6	+	132593120	132594471		TTTGCTGTTCATGATATGAGATAGACAGCTGCTGAAGTGTCATTAGAGCAGTGGCTGCTG	intergenic
ASHG19A3A044517	2.02611	1.01871	2.02611	up	1274.35	2273.69	10.184	11.2028	noncoding	uc001laz.2	AK000154	UCSC_knowngene	5435	chr10	+	115671514	115676949		GGTGAGAATGTGTTTATACTGTATATGGAAACCTAATGCCTCTTTTCTAAAGCTTTGTAC	exon sense-overlapping	NM_198514	NHLRC2	NHL repeat-containing protein 2	+	115614390	115672265
ASHG19A3A011217	2.96118	1.56617	2.96118	up	4480.08	14314.6	12.06	13.6262	noncoding	ENST00000467018	CTC-251H24.1	Ensembl	154	chr19	-	18396152	18396306	NM_001000,ENST00000495111,ENST00000460281,ENST00000446011,ENST00000424573,ENST00000422215,	GAAATAAAATCAGGTACAACTCCAAAAGGACACTGGAGAAGAACCAAGCTGGGTCTATAA	intergenic
ASHG19A3A021731	2.51712	1.33177	2.51712	up	58.5182	143.263	5.75633	7.08811	noncoding	ENST00000460914	RP11-505J9.1	Ensembl	211	chr3	-	148413780	148413991		AGAAGGCAGAGAAACTGAAGCAGTTCTGGCACCCTGGTTTGTTAGAGAAGGAGATGAAAT	intergenic
ASHG19A3A025276	2.20732	1.1423	2.20732	up	75.4952	160.673	6.13092	7.27322	noncoding	ENST00000468675	RP11-1396O13.2	Ensembl	780	chr4	+	9564790	9565570		AATCATGACCTGAGAGGTGCGGCAAATGACTTGAAAGAATTGGTCAATAAAATGATTCCA	intergenic
CUST_469_PI426073487	2.00558	1.00402	2.00558	up	795.356	1389.82	9.50469	10.5087	noncoding	uc.471+	uc.471	UCR	239	chrX	+	41208370	41208609	NM_001356,	GCCCTTGTACATTTTGCCCATAACTTTTTACAAAGTACTTCTTTTATTGCACATTCAGAG	exon sense-overlapping	NM_001193416	DDX3X	ATP-dependent RNA helicase DDX3X isoform 2	+	41192650	41209524
CUST_469_PI426073487	2.00558	1.00402	2.00558	up	795.356	1389.82	9.50469	10.5087	noncoding	uc.471+	uc.471	UCR	239	chrX	+	41208370	41208609	NM_001356,	GCCCTTGTACATTTTGCCCATAACTTTTTACAAAGTACTTCTTTTATTGCACATTCAGAG	exon sense-overlapping	NM_001193417	DDX3X	ATP-dependent RNA helicase DDX3X isoform 3	+	41192650	41209524
CUST_469_PI426073487	2.00558	1.00402	2.00558	up	795.356	1389.82	9.50469	10.5087	noncoding	uc.471+	uc.471	UCR	239	chrX	+	41208370	41208609	NM_001356,	GCCCTTGTACATTTTGCCCATAACTTTTTACAAAGTACTTCTTTTATTGCACATTCAGAG	exon sense-overlapping	NM_001356	DDX3X	ATP-dependent RNA helicase DDX3X isoform 1	+	41192650	41209524
ASHG19A3A034507	2.63606	1.39838	2.63606	up	52.2734	134.76	5.59669	6.99508	noncoding	ENST00000422817	RP3-455J7.3	Ensembl	456	chr1	+	167560628	167561084		TGTAAAGGATGGAAACTATAGCTAGGTCCTGGTCTGGAAAACAAGCTCTGTGAAGACCTG	intergenic
ASHG19A3A009172	3.50411	1.80905	3.50411	up	53.6871	178.404	5.63158	7.44063	noncoding	ENST00000419919	AC098850.1	Ensembl	791	chr17	+	16586750	16587541	NM_002936,	TGGTATAACTAACTGGGTTCAAGGTTGGAAGAAAAATGGGTGGAAGACAAGTGCAGGGAA	intergenic
ASHG19A3A023632	2.56437	1.35861	2.56437	up	11312	39801.1	13.4103	14.7689	noncoding	ENST00000433853	RP11-778D9.4	Ensembl	732	chr3	+	183867491	183868223		AAATCCATGAAGTTTGTGGATGGCCTGACGATCCACAGTGGAGACCCTATTAACTACTAC	intergenic
ASHG19A3A040035	2.04496	1.03207	2.04496	up	66.7752	133.317	5.94617	6.97824	noncoding	AY927528		RNAdb	1257	chrX	-	70469142	70471507		GGAAGCTGAGGAAATGAGAGGGTGGTCTTGAGTGAATATTCAAACCTGTTCCCACCTCTA	exon sense-overlapping	NM_001171163	ZMYM3	zinc finger MYM-type protein 3 isoform 3	-	70469054	70474499
ASHG19A3A040035	2.04496	1.03207	2.04496	up	66.7752	133.317	5.94617	6.97824	noncoding	AY927528		RNAdb	1257	chrX	-	70469142	70471507		GGAAGCTGAGGAAATGAGAGGGTGGTCTTGAGTGAATATTCAAACCTGTTCCCACCTCTA	exon sense-overlapping	NM_201599	ZMYM3	zinc finger MYM-type protein 3 isoform 1	-	70459473	70474038
ASHG19A3A040035	2.04496	1.03207	2.04496	up	66.7752	133.317	5.94617	6.97824	noncoding	AY927528		RNAdb	1257	chrX	-	70469142	70471507		GGAAGCTGAGGAAATGAGAGGGTGGTCTTGAGTGAATATTCAAACCTGTTCCCACCTCTA	exon sense-overlapping	NM_005096	ZMYM3	zinc finger MYM-type protein 3 isoform 1	-	70459473	70474499
ASHG19A3A040035	2.04496	1.03207	2.04496	up	66.7752	133.317	5.94617	6.97824	noncoding	AY927528		RNAdb	1257	chrX	-	70469142	70471507		GGAAGCTGAGGAAATGAGAGGGTGGTCTTGAGTGAATATTCAAACCTGTTCCCACCTCTA	exon sense-overlapping	NM_001171162	ZMYM3	zinc finger MYM-type protein 3 isoform 2	-	70459473	70475047
ASHG19A3A042598	2.97392	1.57236	2.97392	up	638.068	1675.58	9.18693	10.7593	noncoding	ENST00000442520	RP11-460H18.2	Ensembl	397	chr10	-	32520776	32521173		AAGAACAGAATGAAGAAAGTCAGGGGACTGTAAAGGCCAATGTTTGTGTGGGCAAAAAGC	intergenic
ASHG19A3A038141	2.64185	1.40155	2.64185	up	409.226	924.361	8.54289	9.94445	noncoding	ENST00000411521	RP11-323H21.2	Ensembl	244	chr9	-	134657956	134658200		GAGAACTTCTACAACACTTCCATTGAGGAAATTCCCCTCAATGTTCCTGACCTCATCTGA	intergenic
ASHG19A3A029813	2.99423	1.58219	2.99423	up	11153.6	46799.7	13.3931	14.9753	noncoding	ENST00000339867	RP3-391O22.3	Ensembl	399	chr6	-	34544034	34544433		TTCATAGCATTTGCTTATTCCGTGAAGTCTAGGGACAGGAAGATGGTTGGTGACCTGACT	intergenic
ASHG19A3A010455	2.25097	1.17055	2.25097	up	117.71	245.043	6.76736	7.93791	noncoding	uc002knb.2	BC040631	UCSC_knowngene	2044	chr18	+	6256745	6260932		GCTCCTTCTTGGAAAGCTGACATGAACCATCTGCCTTTTTGATTATATTAAAACCTATTT	intronic antisense	NM_173464	L3MBTL4	lethal(3)malignant brain tumor-like protein 4	-	5954704	6414910
ASHG19A3A012829	2.93851	1.55508	2.93851	up	1392.36	3670.07	10.3018	11.8569	noncoding	ENST00000503632	AC011551.1	Ensembl	1002	chr19	+	47061897	47062899		GGACCTGACCTGCCATCTGGGAAAACCCTGCCAAATATGATGATGTCAAGAAAATGATGA	intronic antisense	NM_001205281	LOC100506012	serine/threonine-protein phosphatase 5-like	-	46984044	47104457
ASHG19A3A050799	2.44719	1.29113	2.44719	up	1715.04	3809.86	10.6138	11.9049	noncoding	AK022936		misc_RNA	2867	chr14	-	54890278	54893145		CCCTTAAGTAGCCCTACCTTACTCCTTAGAGCTTATTTTGCTTTTGTATTTAATAAAAGC	intergenic
ASHG19A3A014896	2.25242	1.17147	2.25242	up	3906.28	8570.68	11.8451	13.0166	noncoding	ENST00000415349	AC125238.4	Ensembl	1299	chr2	-	204629017	204630316	ENST00000402024,	CCAACAGTGGATGGCAAAGTGGTGTCTGAGACCAATGACACCAAAGTTCTGAGACATTAA	intergenic
ASHG19A3A048822	3.62803	1.85919	3.62803	up	694.012	2216.75	9.30979	11.169	noncoding	ENST00000432195	RP4-575N6.4	Ensembl	403	chr1	-	101701238	101702084		CCGGCAGATGTGAACTCAAAAACTTCCTCCGCTGTGCAGTTTCAATTGGCAGACACACCC	bidirectional	NM_001400	S1PR1	sphingosine 1-phosphate receptor 1	+	101702304	101707076
CUST_187_PI426075208	2.13747	1.0959	2.13747	up	102.532	204.774	6.56832	7.66422	noncoding	nc-HOXD4-22+	nc-HOXD4-22	HOX cluster	706	chr2	-	176996730	176997436		TACGCAAAGAAACCTTTTAGGAGTAAACAAAACGCACCCGAACTATTCATTATAAAGGAA	natural antisense	NM_019558	HOXD8	homeobox protein Hox-D8 isoform 1	+	176994467	176997423
CUST_187_PI426075208	2.13747	1.0959	2.13747	up	102.532	204.774	6.56832	7.66422	noncoding	nc-HOXD4-22+	nc-HOXD4-22	HOX cluster	706	chr2	-	176996730	176997436		TACGCAAAGAAACCTTTTAGGAGTAAACAAAACGCACCCGAACTATTCATTATAAAGGAA	natural antisense	NM_001199746	HOXD8	homeobox protein Hox-D8 isoform 2	+	176994467	176997423
CUST_187_PI426075208	2.13747	1.0959	2.13747	up	102.532	204.774	6.56832	7.66422	noncoding	nc-HOXD4-22+	nc-HOXD4-22	HOX cluster	706	chr2	-	176996730	176997436		TACGCAAAGAAACCTTTTAGGAGTAAACAAAACGCACCCGAACTATTCATTATAAAGGAA	natural antisense	NM_001199747	HOXD8	homeobox protein Hox-D8 isoform 3	+	176994421	176997423
ASHG19A3A010614	2.3236	1.21636	2.3236	up	71.6899	159.924	6.04991	7.26627	noncoding	ENST00000423619	RP11-54O7.10	Ensembl	156	chr1	-	943453	943609		AATAAAATCAGGTACAACTCCCAAAGGAGACACTGGAGAACAGCCAAGCTGGGTCTGTAA	intergenic
ASHG19A3A035711	2.75686	1.46302	2.75686	up	54.2642	145.048	5.64629	7.10931	noncoding	ENST00000476002	RP11-479P21.1	Ensembl	1164	chr8	-	39015056	39016220		TTCATCAAGGATGGCAAATTGATCAGTGCCTCCACTGACTATAACCTGACAAGAGCATCA	intronic antisense	NM_145004	ADAM32	disintegrin and metalloproteinase	+	38965049	39142436
ASHG19A3A023407	33.1701	5.05181	33.1701	up	86.229	2586.97	6.32474	11.3766	noncoding	ENST00000460407	RP11-38P22.2	Ensembl	2050	chr3	+	152557178	152559228		TCATAATTGTGGTCACTAGAACTGTACTTACCATGGACAGTTAAAACTGAAAAAGACTCA	intergenic
ASHG19A3A027585	3.15136	1.65597	3.15136	up	77.0221	225.53	6.15719	7.81317	noncoding	uc003lsg.2	CR612090	UCSC_knowngene	1256	chr5	-	149822227	149823483		GGTTACATGCCAAACCTTGCTAGGGATTTTAATAACAACATTGAATCTTAACCTGATGAA	intergenic
ASHG19A3A034974	2.32571	1.21767	2.32571	up	1099.09	2249.08	9.97135	11.189	noncoding	ENST00000393373	RP11-560I19.2	Ensembl	375	chr7	+	121874584	121874961		ACCTACATACCTGTTACCACTTTCAAAAATCTAAAGACAGTCGATGTGGATGAGAACTAA	intergenic
ASHG19A3A011811	2.07982	1.05646	2.07982	up	215.156	401.222	7.62876	8.68522	noncoding	ENST00000413308	AC008753.2	Ensembl	775	chr19	-	54275759	54276534		GTTAAAAAGATAAAGGACCGTTTACCTCTTGCTGTGGTGGGTAGTGATATTATCACTGAA	intergenic
ASHG19A3A023605	2.86881	1.52045	2.86881	up	205.299	525.237	7.56711	9.08756	noncoding	ENST00000469911	RP11-646E18.1	Ensembl	741	chr3	+	182328461	182329202		ATTTGCTTGGAAGACCTCATTCATGAAATTGCGCTCCCAGGGAAGCATTTCCAGGAGATT	intergenic
ASHG19A3A031336	10.4082	3.37965	10.4082	up	85.0915	776.612	6.30382	9.68347	noncoding	ENST00000432375	HNRPA1P2	Ensembl	960	chr6	+	32292995	32293955		ATACTTTGCCAAACCATGAAACCAAAGTGGCTATTGTGGTTCCAGTAGCAGCAGTAGCTA	intronic antisense	NM_006781	C6orf10	chromosome 6 open reading frame 10	-	32260474	32339656
ASHG19A3A046258	2.62197	1.39065	2.62197	up	3986.4	10743.6	11.8749	13.2655	noncoding	ENST00000473603	RP1-89D4.1	Ensembl	402	chr11	+	33258553	33258955	NM_001142285,NM_001142283,NM_001142282,NM_001026,	GACATGGCCTTTGTGAGAAGAAAAAGACCTCAAGAAAGCAACGAAAGGAACGCAAGAACA	intergenic
ASHG19A3A044172	2.35458	1.23547	2.35458	up	7765.01	22067.5	12.8487	14.0842	noncoding	ENST00000442381	RP11-589B3.1	Ensembl	270	chr10	+	81303842	81304112	ENST00000461060,ENST00000439728,ENST00000428553,ENST00000393374,	CTATGGAAGGAGTCTCAGGCCAAGGATGTCATCGAACAGTACTTCAAATGCAAGAAATGA	intergenic
ASHG19A3A031052	3.75972	1.91062	3.75972	up	142.666	482.416	7.04511	8.95573	noncoding	AL117559		misc_RNA	1654	chr6	+	22221009	22222616		TCAAACGCTAATCCAAGTTCCCTGCAAAACCTGTTCTGTTTTATATAACATTTACTCGTT	intergenic
ASHG19A3A031059	6.42385	2.68344	6.42385	up	69.4177	401.15	6.00165	8.68509	noncoding	ENST00000403629	RP11-31K13.1	Ensembl	603	chr6	+	24002051	24002654		AACAATCAGCCTTTAAATTTTGGACCCATGAAGGGAGGAAACTTTGGAGGCAGAAACTCT	intergenic
ASHG19A3A017843	2.71324	1.44002	2.71324	up	71.4586	183.95	6.04542	7.48544	noncoding	uc002xyw.2	PPP4R1L	UCSC_knowngene	2495	chr20	-	56806188	56821308		CCTATCAGTGAGCTGAACAAATACATCATTTAAATCTATGCTGCACTTTGAGTTGCTACA	intergenic
ASHG19A3A027361	3.06718	1.61691	3.06718	up	4006.1	13035.8	11.8847	13.5016	noncoding	ENST00000414070	RP11-20O24.4	Ensembl	555	chr1	+	109534903	109535458	NM_001035006,NM_000985,ENST00000504072,ENST00000467688,ENST00000452862,ENST00000422360,ENST00000420302,ENST00000401798,ENST00000395729,ENST00000391360,	TTGCCCAGAAGAAAAGGATATCCCAGAAGAAACTGAAGAAACAAAAACTTATGGCACGGG	intronic antisense	NM_001142550	WDR47	WD repeat-containing protein 47 isoform 1	-	109512837	109584850
ASHG19A3A027361	3.06718	1.61691	3.06718	up	4006.1	13035.8	11.8847	13.5016	noncoding	ENST00000414070	RP11-20O24.4	Ensembl	555	chr1	+	109534903	109535458	NM_001035006,NM_000985,ENST00000504072,ENST00000467688,ENST00000452862,ENST00000422360,ENST00000420302,ENST00000401798,ENST00000395729,ENST00000391360,	TTGCCCAGAAGAAAAGGATATCCCAGAAGAAACTGAAGAAACAAAAACTTATGGCACGGG	intronic antisense	NM_001142551	WDR47	WD repeat-containing protein 47 isoform 3	-	109512837	109584850
ASHG19A3A027361	3.06718	1.61691	3.06718	up	4006.1	13035.8	11.8847	13.5016	noncoding	ENST00000414070	RP11-20O24.4	Ensembl	555	chr1	+	109534903	109535458	NM_001035006,NM_000985,ENST00000504072,ENST00000467688,ENST00000452862,ENST00000422360,ENST00000420302,ENST00000401798,ENST00000395729,ENST00000391360,	TTGCCCAGAAGAAAAGGATATCCCAGAAGAAACTGAAGAAACAAAAACTTATGGCACGGG	intronic antisense	NM_014969	WDR47	WD repeat-containing protein 47 isoform 2	-	109512837	109584850
ASHG19A3A045018	3.16665	1.66296	3.16665	up	5410.95	20187.9	12.3288	13.9918	noncoding	ENST00000473882	RPL36AP40	Ensembl	321	chr11	-	25610020	25610341		TACAAGCATTTTAAACTGGGAGGAGATAAGAAGAGAAAGGGACAAGTGATCCAGTTCTAA	intergenic
ASHG19A3A040973	2.45498	1.29571	2.45498	up	1512.91	3359.01	10.4353	11.731	noncoding	ENST00000418784	CTD-2090I13.4	Ensembl	283	chr1	+	227621764	227622047		ACGATGATGAAGTTCCAGGTATCATGGAGAATTTTGATGAGGCTTCCAAGAATGAGGCAA	intergenic
ASHG19A3A015960	2.37211	1.24617	2.37211	up	270.988	565.407	7.95271	9.19888	noncoding	HIT000257152		H-invDB	322	chr2	+	90153974	90154295		TGTCAGCAGTATAATAACTGGCCTCCCACAGTGATTCAACATGAAACAAAAACCTCAAGA	intergenic
ASHG19A3A053841	2.69894	1.43239	2.69894	up	4845.58	14241.1	12.184	13.6164	noncoding	ENST00000439139	RP11-404O13.4	Ensembl	499	chr1	-	158165422	158165921		ATCTCTACTGCTACCTTACCAATGAGGGCATCCAGTATCTCCGTGATTACCTTCATATGC	intergenic
ASHG19A3A020640	3.22216	1.68803	3.22216	up	2007.6	6009.4	10.8499	12.5379	noncoding	ENST00000333351	AC090043.1	Ensembl	468	chr3	-	1637457	1637929		CAAGGGAAGGCTTTAAATGCCAAGAAAGCGGTGTTGAAAGGTGTCCACAGCCACAAAAAA	intergenic
ASHG19A3A050401	2.84821	1.51005	2.84821	up	130.111	338.158	6.91446	8.42452	noncoding	ENST00000456305	RP4-655N15.3	Ensembl	504	chr1	-	117317741	117318245		ACATTACCTCAATGAACCAGTGAAATCCATCAAAGAATTGGGTGTCCACGTGACCAACTT	intergenic
ASHG19A3A000431	2.83222	1.50193	2.83222	up	4984.84	15833.1	12.2276	13.7295	noncoding	ENST00000501841	AC013489.2	Ensembl	2531	chr15	-	89045154	89052959		ggccaaggtgggaggattgcttgaacccaggctggagtgtggtggcatgatcatggctca	intergenic
ASHG19A3A014076	5.99745	2.58435	5.99745	up	212.462	1101.71	7.61167	10.196	noncoding	uc002sxv.3	BC032409	UCSC_knowngene	2813	chr2	-	98081832	98091049	uc010yvb.1,ENST00000492960,ENST00000448494,CR603951,AK057592,	TCAGGAGAAGAAAAGGAGATCCAGACTCATGACAGAGAGATGACCTTTGCCAAGAGTACA	intergenic
ASHG19A3A036146	7.82593	2.96826	7.82593	up	108.961	747.227	6.6576	9.62586	noncoding	uc003yti.2	AK094705	UCSC_knowngene	5753	chr8	-	133133105	133138858		GGAACACAACTATTCCACAAGTGGCCTTTAGTGCTCTTTATAATATGATTTCCTGTAATT	exon sense-overlapping	NM_001204824	KCNQ3	potassium voltage-gated channel subfamily KQT	-	133133104	133459509
ASHG19A3A036146	7.82593	2.96826	7.82593	up	108.961	747.227	6.6576	9.62586	noncoding	uc003yti.2	AK094705	UCSC_knowngene	5753	chr8	-	133133105	133138858		GGAACACAACTATTCCACAAGTGGCCTTTAGTGCTCTTTATAATATGATTTCCTGTAATT	exon sense-overlapping	NM_004519	KCNQ3	potassium voltage-gated channel subfamily KQT	-	133133104	133493004
ASHG19A3A050452	2.9771	1.57391	2.9771	up	3070.5	8753.59	11.4736	13.0475	noncoding	ENST00000455851	RP11-217F17.1	Ensembl	743	chr13	+	105466677	105467420		TAAAGGAATTTTGCAGAGCTGAAGATAAGTGCCTGAGAAAGAAGTTTGCCCATAAGATGC	intergenic
ASHG19A3A024017	2.26929	1.18224	2.26929	up	328.772	652.411	8.23906	9.42131	noncoding	ENST00000421246	RP11-800K23.2	Ensembl	576	chr4	-	22728997	22729573	NM_001791,NM_001039802,ENST00000456658,	CCTAAAGAATGTATTTGACGAAGCAATATTGGCTGCCCTGGAGCCTCCAGAACCGAAAAA	intronic antisense	NM_020973	GBA3	cytosolic beta-glucosidase isoform a	+	22694547	22821192
ASHG19A3A024017	2.26929	1.18224	2.26929	up	328.772	652.411	8.23906	9.42131	noncoding	ENST00000421246	RP11-800K23.2	Ensembl	576	chr4	-	22728997	22729573	NM_001791,NM_001039802,ENST00000456658,	CCTAAAGAATGTATTTGACGAAGCAATATTGGCTGCCCTGGAGCCTCCAGAACCGAAAAA	intronic antisense	NM_001128432	GBA3	cytosolic beta-glucosidase isoform b	+	22694547	22821192
ASHG19A3A050203	2.31029	1.20808	2.31029	up	398.582	793.491	8.50847	9.71654	noncoding	uc001vfo.1	D28359	UCSC_knowngene	2420	chr13	+	52033095	52035515		CCCAGGGTGACATGTTAGATCTTTGTACGTAATTGAAAATAATGTGGCAAGATTAATAGC	intergenic
ASHG19A3A038404	2.06294	1.0447	2.06294	up	219.102	404.268	7.65102	8.69573	noncoding	ENST00000441073	RP11-296P7.4	Ensembl	1238	chr9	+	19026889	19028127		GTCTTGTCAATGAACCACAAGGAGAAGTTTGAGAACTTGCGGATCCAACATCCAAAAGGG	intronic antisense	NM_153707	FAM154A	hypothetical protein LOC158297	-	18927890	19033256
ASHG19A3A055218	2.79413	1.4824	2.79413	up	135.222	344.545	6.96987	8.45227	noncoding	ENST00000376792	HLA-J	Ensembl	1666	chr6	+	29973747	29977729	uc003nov.3,	GCTGTGATGTGGAGGAAGAAGAGCTCAGTCACACATTTCTGGAAACTTCTCAAGGTTCCA	intergenic
ASHG19A3A044330	2.28598	1.19282	2.28598	up	1162.79	2339.7	10.0488	11.2416	noncoding	ENST00000398190	RP11-7D5.2	Ensembl	775	chr10	+	97354354	97355129		GGACAAGACAGGTGCTAAAGTCGAATGAGCTGATGGATATGAATGACCAGTCCAAGAATC	intergenic
ASHG19A3A013694	2.55797	1.355	2.55797	up	1309.01	2988.68	10.2185	11.5735	noncoding	ENST00000439197	AC016727.3	Ensembl	166	chr2	-	61816632	61816798		ACAATATGTGCCTCCAGTGTTTCCATCGGTATGCGAAGGATATAGGTTTCATTAAGTTGG	intergenic
ASHG19A3A015692	4.47145	2.16074	4.47145	up	154.414	612.341	7.16189	9.32263	noncoding	AK123369		misc_RNA	2244	chr2	+	61153043	61155287		CTAATACTTCAGGAAAACTCATGATGGTTTCCATGTTAAGAGAGACATGGAGCAGGGCAC	intergenic
ASHG19A3A000426	3.7735	1.9159	3.7735	up	59.0601	207.486	5.7696	7.68551	noncoding	ENST00000501177	AC108084.1	Ensembl	628	chr16	-	54952843	54962463		CGGCTTTCCGGAGTAGAGCCCTTGGAGGTGTTAAGTGTGATGCTTCCATAATACATTTGG	intergenic
ASHG19A3A049555	7.26395	2.86075	7.26395	up	83.2939	541.552	6.27193	9.13268	noncoding	ENST00000425350	RP11-165D7.4	Ensembl	962	chr13	-	49151109	49152224		CCTTTCTTCCCATAGCTTCCAGCCTGGTGGGGAATAAAGGAATTAAATAAGCAATTACAA	intergenic
ASHG19A3A007421	8.81684	3.14026	8.81684	up	55.5828	442.423	5.68433	8.8246	noncoding	NR_026827	LOC84856	RefSeq_NR	2322	chr10	+	42970938	42990784		CAGAGTACTCTTAAGCAATCCCTTGGCCAAAACCAGCAACTGATTTGGATACCATCAAGA	intergenic
ASHG19A3A035840	2.78319	1.47674	2.78319	up	109.505	280.468	6.66616	8.1429	noncoding	ENST00000501063	AL359853.3	Ensembl	1574	chr1	+	179831572	179833589		GGTGCATCTCTGGGGTACATTCTTCATACAGACTAACAAATAACTTCAGGTTTCACAACA	intronic antisense	NM_145034	TOR1AIP2	torsin-1A-interacting protein 2 isoform b	-	179809101	179846941
ASHG19A3A035840	2.78319	1.47674	2.78319	up	109.505	280.468	6.66616	8.1429	noncoding	ENST00000501063	AL359853.3	Ensembl	1574	chr1	+	179831572	179833589		GGTGCATCTCTGGGGTACATTCTTCATACAGACTAACAAATAACTTCAGGTTTCACAACA	natural antisense	NM_022347	TOR1AIP2	interferon alpha responsive protein isoform a	-	179828164	179846941
ASHG19A3A035840	2.78319	1.47674	2.78319	up	109.505	280.468	6.66616	8.1429	noncoding	ENST00000501063	AL359853.3	Ensembl	1574	chr1	+	179831572	179833589		GGTGCATCTCTGGGGTACATTCTTCATACAGACTAACAAATAACTTCAGGTTTCACAACA	intronic antisense	NM_001199260	TOR1AIP2	torsin-1A-interacting protein 2 isoform b	-	179809101	179846941
ASHG19A3A021440	2.11196	1.07858	2.11196	up	3694.84	7410.68	11.756	12.8346	noncoding	uc003ebh.1	BC016962	UCSC_knowngene	1794	chr3	-	114033681	114035475		GTGACAGTATCCTTACCTGCCATTTAATATTAGCCTCGTATTTTTCTCACGTATATTTAC	intergenic
ASHG19A3A042488	5.0262	2.32947	5.0262	up	56.3428	260.891	5.70222	8.03169	noncoding	AK024109		NRED	2956	chr10	-	16733394	16736356		CATTTCCTCATGGAGCCTTGGATTACCTTTTATGCAGTTAAGTCAACATTAAAAAGTTTC	intron sense-overlapping	NM_152724	RSU1	ras suppressor protein 1 isoform 2	-	16632616	16859453
ASHG19A3A042488	5.0262	2.32947	5.0262	up	56.3428	260.891	5.70222	8.03169	noncoding	AK024109		NRED	2956	chr10	-	16733394	16736356		CATTTCCTCATGGAGCCTTGGATTACCTTTTATGCAGTTAAGTCAACATTAAAAAGTTTC	intron sense-overlapping	NM_012425	RSU1	ras suppressor protein 1 isoform 1	-	16632616	16859453
ASHG19A3A036717	2.16048	1.11135	2.16048	up	142.994	283.058	7.04872	8.16007	noncoding	HIT000067254		H-invDB	619	chr8	+	81454720	81455338		CTGCCCTGAAAGGGGCTGAAATGAAGCCATTAAGACCGAAGTGTACTTTTTAAAACTCCA	intergenic
ASHG19A3A021442	3.43567	1.78059	3.43567	up	633.536	1890.27	9.17482	10.9554	noncoding	AK022228		misc_RNA	2351	chr3	-	114053747	114056098		AGAAAATAATTGGAACACATGGATCTGTTACAATTCTACACAGGGGGAAACAAGCTAAGC	intergenic
ASHG19A3A041811	2.82443	1.49796	2.82443	up	4636.82	14193.4	12.1155	13.6135	noncoding	ENST00000422633	EIF4A1P2	Ensembl	1220	chrY	-	5205785	5207005	NM_001416,ENST00000428832,	ATTGAGATCTTCTACAACACCTCCATTGAGGAAATGCCCCCAATGTTGCTGACCTCATCT	intronic antisense	NM_032973	PCDH11Y	protocadherin-11 Y-linked isoform c	+	4924130	5610264
ASHG19A3A036302	2.80286	1.4869	2.80286	up	40.3919	112.027	5.2226	6.7095	noncoding	ENST00000438784	AF228730.4	Ensembl	848	chr8	+	6980378	6981226		CCAGTCCAAGAATCTGTTTTAAGTTCAGACTTAAAACAGTGGCAAATAAGAAGTCCTATT	intergenic
ASHG19A3A021683	2.80091	1.4859	2.80091	up	254.979	623.431	7.86413	9.35003	noncoding	ENST00000510488	RP11-438D8.3	Ensembl	1269	chr3	-	141189475	141190744		AAGGAGCTGCTCTTTATGAAGAAGAACCACAAAGAGGAAGTAAAAGGCCTACAAGCCCAG	intergenic
ASHG19A3A009149	2.1034	1.07272	2.1034	up	307.622	571.311	8.14096	9.21368	noncoding	ENST00000452091	AC005517.3	Ensembl	489	chr17	+	15410179	15410668		TACAAACGGTTCCTAATTTTTCATCTGCACTGCCAAGACAGCGTGGTTGAATGGGAAGCA	intronic antisense	NM_145301	FAM18B2	hypothetical protein LOC201158 isoform 1	-	15405577	15466945
ASHG19A3A009149	2.1034	1.07272	2.1034	up	307.622	571.311	8.14096	9.21368	noncoding	ENST00000452091	AC005517.3	Ensembl	489	chr17	+	15410179	15410668		TACAAACGGTTCCTAATTTTTCATCTGCACTGCCAAGACAGCGTGGTTGAATGGGAAGCA	intronic antisense	NM_001204478	FAM18B2-CDRT4	hypothetical protein LOC100533496	-	15339331	15466945
ASHG19A3A028025	2.47811	1.30924	2.47811	up	1292.26	2837.57	10.2018	11.5111	noncoding	NR_027028	GUSBP1	RefSeq_NR	703	chr5	+	21459588	21497305	uc011cnn.1,uc010iyn.2,uc003jxm.2,uc003jxm.2,NR_029426,NR_027386,NR_024054,NR_003660,NR_003504,ENST00000513408,ENST00000512685,ENST00000423899,ENST00000380734,ENST00000355132,	ACATCACAATCCCATTATTCAGAGCGTGTATGGAGTGGAAACGCTTGTAGGGTTTCACCA	intergenic
ASHG19A3L0000086	2.29202	1.19662	2.29202	up	1233.23	2503.88	10.1401	11.3367	noncoding	BI048312	lincRNA-WNT9A	lincRNA	393	chr1	+	227598421	228286740	NM_001658,NM_001024228,NM_001024227,NM_001024226,	CGAAAAAGACAACCTCTACTTTTTTCTTTAGTATTTGGATAAACACTGAAGCTGGAGCTG	exon sense-overlapping	NM_001024226	ARF1	ADP-ribosylation factor 1	+	228270360	228286913
ASHG19A3L0000086	2.29202	1.19662	2.29202	up	1233.23	2503.88	10.1401	11.3367	noncoding	BI048312	lincRNA-WNT9A	lincRNA	393	chr1	+	227598421	228286740	NM_001658,NM_001024228,NM_001024227,NM_001024226,	CGAAAAAGACAACCTCTACTTTTTTCTTTAGTATTTGGATAAACACTGAAGCTGGAGCTG	intronic antisense	NM_003395	WNT9A	protein Wnt-9a precursor	-	228109164	228135676
ASHG19A3L0000086	2.29202	1.19662	2.29202	up	1233.23	2503.88	10.1401	11.3367	noncoding	BI048312	lincRNA-WNT9A	lincRNA	393	chr1	+	227598421	228286740	NM_001658,NM_001024228,NM_001024227,NM_001024226,	CGAAAAAGACAACCTCTACTTTTTTCTTTAGTATTTGGATAAACACTGAAGCTGGAGCTG	intronic antisense	NM_001161465	JMJD4	jmjC domain-containing protein 4 isoform 2	-	227918889	227923112
ASHG19A3L0000086	2.29202	1.19662	2.29202	up	1233.23	2503.88	10.1401	11.3367	noncoding	BI048312	lincRNA-WNT9A	lincRNA	393	chr1	+	227598421	228286740	NM_001658,NM_001024228,NM_001024227,NM_001024226,	CGAAAAAGACAACCTCTACTTTTTTCTTTAGTATTTGGATAAACACTGAAGCTGGAGCTG	exon sense-overlapping	NM_001024227	ARF1	ADP-ribosylation factor 1	+	228270850	228286913
ASHG19A3L0000086	2.29202	1.19662	2.29202	up	1233.23	2503.88	10.1401	11.3367	noncoding	BI048312	lincRNA-WNT9A	lincRNA	393	chr1	+	227598421	228286740	NM_001658,NM_001024228,NM_001024227,NM_001024226,	CGAAAAAGACAACCTCTACTTTTTTCTTTAGTATTTGGATAAACACTGAAGCTGGAGCTG	exon sense-overlapping	NM_001024228	ARF1	ADP-ribosylation factor 1	+	228270850	228286913
ASHG19A3L0000086	2.29202	1.19662	2.29202	up	1233.23	2503.88	10.1401	11.3367	noncoding	BI048312	lincRNA-WNT9A	lincRNA	393	chr1	+	227598421	228286740	NM_001658,NM_001024228,NM_001024227,NM_001024226,	CGAAAAAGACAACCTCTACTTTTTTCTTTAGTATTTGGATAAACACTGAAGCTGGAGCTG	intronic antisense	NM_023007	JMJD4	jmjC domain-containing protein 4 isoform 1	-	227918889	227923112
ASHG19A3L0000086	2.29202	1.19662	2.29202	up	1233.23	2503.88	10.1401	11.3367	noncoding	BI048312	lincRNA-WNT9A	lincRNA	393	chr1	+	227598421	228286740	NM_001658,NM_001024228,NM_001024227,NM_001024226,	CGAAAAAGACAACCTCTACTTTTTTCTTTAGTATTTGGATAAACACTGAAGCTGGAGCTG	intron sense-overlapping	NM_053052	SNAP47	synaptosomal-associated protein 47	+	227922696	227968932
ASHG19A3L0000086	2.29202	1.19662	2.29202	up	1233.23	2503.88	10.1401	11.3367	noncoding	BI048312	lincRNA-WNT9A	lincRNA	393	chr1	+	227598421	228286740	NM_001658,NM_001024228,NM_001024227,NM_001024226,	CGAAAAAGACAACCTCTACTTTTTTCTTTAGTATTTGGATAAACACTGAAGCTGGAGCTG	exon sense-overlapping	NM_001658	ARF1	ADP-ribosylation factor 1	+	228270360	228286913
ASHG19A3L0000086	2.29202	1.19662	2.29202	up	1233.23	2503.88	10.1401	11.3367	noncoding	BI048312	lincRNA-WNT9A	lincRNA	393	chr1	+	227598421	228286740	NM_001658,NM_001024228,NM_001024227,NM_001024226,	CGAAAAAGACAACCTCTACTTTTTTCTTTAGTATTTGGATAAACACTGAAGCTGGAGCTG	intron sense-overlapping	NM_033131	WNT3A	protein Wnt-3a precursor	+	228194722	228248972
ASHG19A3L0000086	2.29202	1.19662	2.29202	up	1233.23	2503.88	10.1401	11.3367	noncoding	BI048312	lincRNA-WNT9A	lincRNA	393	chr1	+	227598421	228286740	NM_001658,NM_001024228,NM_001024227,NM_001024226,	CGAAAAAGACAACCTCTACTTTTTTCTTTAGTATTTGGATAAACACTGAAGCTGGAGCTG	intron sense-overlapping	NM_183062	PRSS38	serine protease 38 precursor	+	228003417	228034171
ASHG19A3L0000086	2.29202	1.19662	2.29202	up	1233.23	2503.88	10.1401	11.3367	noncoding	BI048312	lincRNA-WNT9A	lincRNA	393	chr1	+	227598421	228286740	NM_001658,NM_001024228,NM_001024227,NM_001024226,	CGAAAAAGACAACCTCTACTTTTTTCTTTAGTATTTGGATAAACACTGAAGCTGGAGCTG	intron sense-overlapping	NM_178549	ZNF678	zinc finger protein 678	+	227751219	227850164
ASHG19A3A046486	2.71218	1.43945	2.71218	up	15419.1	64510	13.9414	15.3808	noncoding	ENST00000490750	RPLP0P2	Ensembl	961	chr11	+	61404151	61405112	NR_002775,NM_053275,NM_001002,ENST00000413306,	TTCCAGGCTTTAGGTATCATCACTAAAATCTCCAGGGGCGCCATTGAAATCCTGAGTGAT	intergenic
ASHG19A3A039583	3.59086	1.84433	3.59086	up	111.849	364.643	6.6971	8.54143	noncoding	ENST00000430057	AC002365.4	Ensembl	578	chrX	-	9992881	10006694		AGCACTTTTCAAAAAAGGATGCCACTTGAAATTCATTTATGTGCTGGGCGCGGTGGCTCA	intronic antisense	NM_015691	WWC3	protein WWC3	+	9983794	10112518
ASHG19A3A026925	5.13833	2.3613	5.13833	up	448.785	1996.5	8.67191	11.0332	noncoding	AK090694		misc_RNA	2488	chr5	-	71735725	71738214		GCTTTCTGCTTCACTGAAAAAGCAGTTTACCTGAAAAGAGCATGTAACCTATATTTTGTT	intergenic
ASHG19A3A044791	2.73698	1.45259	2.73698	up	1215.61	2982.34	10.119	11.5716	noncoding	ENST00000426436	AC127526.2	Ensembl	775	chr11	-	3570974	3571749	ENST00000483874,ENST00000479743,	GATGAGACGCATGCTAAAGTTGAATGAGCTGATGGATATGAACCACCAATCCAAGAATCT	intergenic
ASHG19A3A037394	3.12639	1.6445	3.12639	up	1363.69	3833.11	10.2681	11.9126	noncoding	ENST00000449433	RBPJP5	Ensembl	1258	chr9	-	41884909	41886167	NM_203284,NM_203283,NM_015874,NM_005349,ENST00000451936,ENST00000411556,ENST00000357305,	AAATGATGGAATCATATATTCCACCAGCCTTACCTTTACCTACACACCAGAAGCAGGGCC	intergenic
ASHG19A3A025573	2.34998	1.23265	2.34998	up	45.3667	105.946	5.39169	6.62433	noncoding	ENST00000483696	RP11-30P21.1	Ensembl	477	chr4	+	63114011	63114488		TTGAGAACCAGTCGAAAGAGGCTTAAGCTGTTGGAACCTATTCTCTATGAATTCATGCCA	intergenic
ASHG19A3A052458	2.54673	1.34864	2.54673	up	364.194	801.369	8.38077	9.72941	noncoding	AL109667		NRED	3636	chr15	-	81186190	81189808		TGTCATCTTTGGCATAGAGACCAAAGGGACCAGACTGGGGTAATAAGGAAGGAAAGTATA	natural antisense	NM_018689	KIAA1199	KIAA1199 precursor	+	81071711	81243999
ASHG19A3A035289	3.69894	1.88711	3.69894	up	433.462	1396.59	8.62615	10.5133	noncoding	ENST00000423757	AC004941.4	Ensembl	834	chr7	+	149031114	149031948	NM_013269,NM_002520,NM_001037738,NM_001004419,ENST00000458237,ENST00000449818,ENST00000427761,ENST00000412758,ENST00000393516,	CCAGTGAAGAAATCTATATGAGATACTCCAAGCCAAAAATGCACAAAAGTCAAATCAGAA	intergenic
ASHG19A3A023075	6.01411	2.58835	6.01411	up	325.545	1736.41	8.22716	10.8155	noncoding	ENST00000462291	RP11-567P17.4	Ensembl	880	chr3	+	120524712	120525592		TCAGTCACTTTTTACCTGAGTGTATAATCCCAAGATCAGTGTTATATTTTACTGGAGAAG	intergenic
ASHG19A3A013654	2.52262	1.33493	2.52262	up	1046.99	2336.36	9.90335	11.2383	noncoding	CR609715		misc_RNA	1695	chr1	-	247350699	247352392		GTTTGGAGGAGTAGTTAGTATTTGGCTCATATAATGTGTTAGGTAACTATTCTAAGCCAT	intergenic
ASHG19A3A050416	2.1342	1.09369	2.1342	up	191.157	369.415	7.46748	8.56118	noncoding	AF339771		misc_RNA	824	chr13	+	99740072	99740877		TTACCTTGGCTCTCTAAGCTGTATCTACTTCTATACAAGGCGAACAATTTTGTCTTTTTA	intergenic
ASHG19A3A048797	3.73583	1.90143	3.73583	up	458.613	1493.69	8.70109	10.6025	noncoding	AK098081		misc_RNA	2404	chr12	+	64842500	64844903		CAGGTCTTCGCTCTTGTCATTAGATATCAAAGAACTGAAATTAGTTGGAATTGTAAGCAG	intergenic
ASHG19A3A049408	2.00978	1.00704	2.00978	up	164.659	304.553	7.25519	8.26223	noncoding	U50530		NRED	1426	chr13	-	33070510	33071929		TCCATGTCTTCTACATGGAAAACATGTCAAAGGACAGGAGCAGTGACCACCTGACAACAT	intron sense-overlapping	NM_033111	N4BP2L2	NEDD4-binding protein 2-like 2 isoform 1	-	33006929	33112936
ASHG19A3A028765	4.12833	2.04556	4.12833	up	2622.09	10973.6	11.2368	13.2823	noncoding	ENST00000498453	RP11-114H7.1	Ensembl	532	chr5	+	130325589	130326121		GAGGAGATGATGCGTTGCTTCCAGCATAAGTATGATGGGATCATCCTTCCTGACAAATAA	intergenic
ASHG19A3A007449	2.95452	1.56292	2.95452	up	112.361	305.492	6.70365	8.26657	noncoding	NR_026966	LOC100130691	RefSeq_NR	5223	chr2	-	178148235	178257419		CAAACTCCACGCCACCTGGTTTGCTCAACAGCAAAAGACACGGCCGGGTGCGGTGGCTCA	bidirectional	NM_003659	AGPS	"alkyldihydroxyacetonephosphate synthase,"	+	178257470	178408564
ASHG19A3A035767	2.15839	1.10995	2.15839	up	149.887	297.656	7.12034	8.2303	noncoding	ENST00000498403	RP11-1070A24.1	Ensembl	237	chr8	-	54799567	54799804		AGGCATTATTGTGGCTAATGTTGTCTGATTTATTGCTTCAACAAACCAGAAGACAAGTAA	intronic antisense	NM_003702	RGS20	regulator of G-protein signaling 20 isoform b	+	54793441	54871863
ASHG19A3A035767	2.15839	1.10995	2.15839	up	149.887	297.656	7.12034	8.2303	noncoding	ENST00000498403	RP11-1070A24.1	Ensembl	237	chr8	-	54799567	54799804		AGGCATTATTGTGGCTAATGTTGTCTGATTTATTGCTTCAACAAACCAGAAGACAAGTAA	intronic antisense	NM_170587	RGS20	regulator of G-protein signaling 20 isoform a	+	54764367	54871863
ASHG19A3A025438	2.72379	1.44561	2.72379	up	5554.64	16993.1	12.3624	13.808	noncoding	ENST00000447415	RP4-612B15.2	Ensembl	555	chr1	+	87250595	87251150		TTGCCCAGAAGAAAAAGATATCCCAGAAGAAACTGAAGAAACAAAAACTTATGGCCCGGA	intergenic
ASHG19A3A048509	2.4197	1.27483	2.4197	up	47.1582	112.979	5.44993	6.72476	noncoding	uc001dqu.2	BC030750	UCSC_knowngene	1327	chr1	-	95123089	95285834		ACCACGTGGATCCCAAGGCCATCCCAGGAACTCTTTGGAGGGGAGAAGCCCAGTGGAAAC	bidirectional	NM_152369	SLC44A3	choline transporter-like protein 3 isoform 2	+	95286099	95360802
ASHG19A3A048509	2.4197	1.27483	2.4197	up	47.1582	112.979	5.44993	6.72476	noncoding	uc001dqu.2	BC030750	UCSC_knowngene	1327	chr1	-	95123089	95285834		ACCACGTGGATCCCAAGGCCATCCCAGGAACTCTTTGGAGGGGAGAAGCCCAGTGGAAAC	bidirectional	NM_001114106	SLC44A3	choline transporter-like protein 3 isoform 1	+	95285900	95360802
ASHG19A3A051437	5.37134	2.42528	5.37134	up	159.464	749.621	7.20622	9.63151	noncoding	AK022117		NRED	2010	chr14	+	55170988	55172998		TGTAAGTGCTGTGAATGTACAGAATGGAGAGATCCTTGTGAACTGGAGGGTCAAGAAAGC	intron sense-overlapping	NM_015589	SAMD4A	protein Smaug homolog 1 isoform 1	+	55034636	55260033
ASHG19A3A051437	5.37134	2.42528	5.37134	up	159.464	749.621	7.20622	9.63151	noncoding	AK022117		NRED	2010	chr14	+	55170988	55172998		TGTAAGTGCTGTGAATGTACAGAATGGAGAGATCCTTGTGAACTGGAGGGTCAAGAAAGC	intron sense-overlapping	NM_001161576	SAMD4A	protein Smaug homolog 1 isoform 2	+	55034636	55260033
ASHG19A3A022354	2.47748	1.30887	2.47748	up	362.634	776.749	8.37492	9.68379	noncoding	ENST00000452569	AC121253.1	Ensembl	648	chr3	+	22423309	22597727	NM_002128,AK122825,	GTCTGCTAAAGAGAAAGGAAAATTTGAAGATATGGCAAAGGCGGACAAGGCCCGTTATGA	intergenic
ASHG19A3A048143	3.50355	1.80882	3.50355	up	328.461	993.554	8.23821	10.047	noncoding	ENST00000472241	RP11-338K17.1	Ensembl	394	chr12	-	124205792	124206186		AAGTTCAAAGAGTGGAACAAGACTGGCAAGAACAAGTGGTTCTTCCAGAAGCTGTGGTTT	intronic antisense	NM_012463	ATP6V0A2	V-type proton ATPase 116 kDa subunit a isoform	+	124196864	124246301
ASHG19A3A024800	6.98308	2.80386	6.98308	up	886.859	5748.23	9.66281	12.4667	noncoding	ENST00000512366	RP11-481K16.2	Ensembl	460	chr4	-	144476276	144476736	NR_002944,NM_031157,NM_002136,NM_001011725,NM_001011724,ENST00000505767,ENST00000444945,ENST00000437295,ENST00000432375,ENST00000430583,ENST00000424481,ENST00000406078,ENST00000404243,ENST00000391992,ENST00000222956,	GACAACAATCAGTCTTCAAATTTTGGACCCATGAAGGGAGGAAACTTTGGAGGCAGAAGC	natural antisense	NM_003601	SMARCA5	SWI/SNF-related matrix-associated	+	144434615	144478642
ASHG19A3A031674	2.18815	1.12971	2.18815	up	395.965	748.138	8.49812	9.62782	noncoding	ENST00000444820	RP11-442B12.1	Ensembl	576	chr6	+	64190038	64191781		AACAGATATGCGGGAGGAGCAGATCACTGCTTTGAGAACTATATGCAATCCATGGATGTG	intergenic
ASHG19A3A055023	2.6795	1.42197	2.6795	up	1808.2	4466.05	10.6902	12.1122	noncoding	uc010vry.1	CR620444	UCSC_knowngene	2102	chr17	-	3710046	3712148		GTCCAGGAAGATTGTTCTTGCATAACCAGACCCACAATAAATATCTACAACTTTTCTTAC	intergenic
CUST_88_PI426075208	2.62606	1.3929	2.62606	up	405.979	913.483	8.53387	9.92677	noncoding	nc-HOXB2-162+	nc-HOXB2-162	HOX cluster	178	chr17	+	46623286	46623464		TTAACTTAGAGCACTCTCAAAGTTCAGATCAGCGTTATGTGTGTGCATGAGTGTGGTGGG	bidirectional	NM_002145	HOXB2	homeobox protein Hox-B2	-	46620018	46622393
ASHG19A3A035628	2.13635	1.09515	2.13635	up	97.9549	196.434	6.50187	7.59701	noncoding	ENST00000515686	RP11-14I17.1	Ensembl	669	chr8	-	26290544	26291581		TTCGGAAATGAATTTTCTTCTTTTGATACAGGATTTACTTCATTTGGGTCACTAGGTCAG	intergenic
ASHG19A3A042008	2.30578	1.20526	2.30578	up	324.725	654.813	8.22399	9.42924	noncoding	NR_026710	NCRNA00105	RefSeq_NR	1789	chrY	+	1469423	1482478		GGGGGCGCATGTAGCTGCACGCCCCTCTGTAATTGCTGAAATAAAAAGATGGTCTGCTGT	natural antisense	NM_001173473	ASMTL	N-acetylserotonin O-methyltransferase-like	-	1472031	1522655
ASHG19A3A042008	2.30578	1.20526	2.30578	up	324.725	654.813	8.22399	9.42924	noncoding	NR_026710	NCRNA00105	RefSeq_NR	1789	chrY	+	1469423	1482478		GGGGGCGCATGTAGCTGCACGCCCCTCTGTAATTGCTGAAATAAAAAGATGGTCTGCTGT	natural antisense	NM_001173474	ASMTL	N-acetylserotonin O-methyltransferase-like	-	1472031	1521870
ASHG19A3A042008	2.30578	1.20526	2.30578	up	324.725	654.813	8.22399	9.42924	noncoding	NR_026710	NCRNA00105	RefSeq_NR	1789	chrY	+	1469423	1482478		GGGGGCGCATGTAGCTGCACGCCCCTCTGTAATTGCTGAAATAAAAAGATGGTCTGCTGT	natural antisense	NM_004192	ASMTL	N-acetylserotonin O-methyltransferase-like	-	1472031	1521870
ASHG19A3A011063	6.70707	2.74568	6.70707	up	996.937	6148.02	9.82484	12.5705	noncoding	ENST00000444945	CTC-499B15.3	Ensembl	962	chr19	-	11776883	11777845	NR_002944,NM_031157,NM_002136,NM_001011725,NM_001011724,ENST00000437295,ENST00000429216,ENST00000427917,ENST00000411735,ENST00000406883,ENST00000406078,ENST00000222956,	AGACTGTCATTCAGAAATACCATACTGTGAATGGCCACAACTGTGAAGTTAGAAAAGCCC	intergenic
ASHG19A3A054507	2.06054	1.04302	2.06054	up	120.104	229.669	6.79772	7.84074	noncoding	BC047516		misc_RNA	3382	chr16	+	31067780	31074084		AGGCTGGCTGGGTGTCTCTATTCCAAAGACCTGTCTCTGCACATTAAAGACCAAGATATG	natural antisense	NM_024706	ZNF668	zinc finger protein 668 isoform a	-	31072163	31085641
ASHG19A3A054507	2.06054	1.04302	2.06054	up	120.104	229.669	6.79772	7.84074	noncoding	BC047516		misc_RNA	3382	chr16	+	31067780	31074084		AGGCTGGCTGGGTGTCTCTATTCCAAAGACCTGTCTCTGCACATTAAAGACCAAGATATG	natural antisense	NM_001172668	ZNF668	zinc finger protein 668 isoform a	-	31072168	31084823
ASHG19A3A054507	2.06054	1.04302	2.06054	up	120.104	229.669	6.79772	7.84074	noncoding	BC047516		misc_RNA	3382	chr16	+	31067780	31074084		AGGCTGGCTGGGTGTCTCTATTCCAAAGACCTGTCTCTGCACATTAAAGACCAAGATATG	natural antisense	NM_001172670	ZNF668	zinc finger protein 668 isoform a	-	31072163	31076409
ASHG19A3A054507	2.06054	1.04302	2.06054	up	120.104	229.669	6.79772	7.84074	noncoding	BC047516		misc_RNA	3382	chr16	+	31067780	31074084		AGGCTGGCTGGGTGTCTCTATTCCAAAGACCTGTCTCTGCACATTAAAGACCAAGATATG	natural antisense	NM_001172669	ZNF668	zinc finger protein 668 isoform b	-	31072163	31076409
ASHG19A3A026912	3.07394	1.62009	3.07394	up	141.744	391.831	7.03525	8.65534	noncoding	ENST00000513408	RP11-497H16.8	Ensembl	1180	chr5	-	69790117	69796730	NR_027386,ENST00000512685,	CATTTTTCATCTATATTATGAGGCAGTAAGAGTCTTCTGTTTTTCCAAAGTTGAGACTGC	intergenic
ASHG19A3A050994	2.65636	1.40945	2.65636	up	186.114	446.372	7.42574	8.8352	noncoding	uc001xsu.1	AK125727	UCSC_knowngene	1677	chr14	-	77248082	77253067		ACTCAGCTAGGAATTAGAAACATCATTTGTCCTCTTGGCCTGTTCAGCTGGTGACTGTAG	natural antisense	NM_014909	VASH1	vasohibin-1	+	77228234	77249363
ASHG19A3A048820	2.38566	1.25439	2.38566	up	156.345	339.425	7.17732	8.4317	noncoding	CR612226		RNAdb	1299	chr12	+	68055145	68056443	NM_006482,NM_003583,	GATGACAGGAGTAAGACTGTTTAGTGAATATCTGTTAAATTTTATTGTTGTGGCCAGAGA	exon sense-overlapping	NM_003583	DYRK2	dual specificity	+	68042511	68056444
ASHG19A3A048820	2.38566	1.25439	2.38566	up	156.345	339.425	7.17732	8.4317	noncoding	CR612226		RNAdb	1299	chr12	+	68055145	68056443	NM_006482,NM_003583,	GATGACAGGAGTAAGACTGTTTAGTGAATATCTGTTAAATTTTATTGTTGTGGCCAGAGA	exon sense-overlapping	NM_006482	DYRK2	dual specificity	+	68042511	68056444
ASHG19A3A045747	2.24073	1.16397	2.24073	up	471.516	903.643	8.74434	9.90831	noncoding	uc009yzx.1	AK289390	UCSC_knowngene	2435	chr11	-	118097405	118099840		TTGTAACTCTTGGTATCTTTACTGCATCATAGTCAATAAACTTCTTTGTACCCTTTGGCT	intergenic
ASHG19A3A039987	2.85642	1.51421	2.85642	up	191.301	491.227	7.46832	8.98253	noncoding	ENST00000428431	RP13-100A9.2	Ensembl	301	chrX	-	63946627	63946928		GTCATTGAAGAGCAGGTAGCAGCTCTTGAGCAGACAGCTTAAAAGTTAAATGCATTTTTT	intergenic
ASHG19A3A028202	2.43674	1.28495	2.43674	up	5254.12	13754.9	12.2912	13.5761	noncoding	ENST00000396949	RP11-94D20.1	Ensembl	612	chr5	+	52502392	52503008		GTGGAGAAGAAAATTGACAAATACACAGAGGTACTCAAGACCCACATACTCCTGCTCTGA	intergenic
ASHG19A3A000076	4.41177	2.14136	4.41177	up	3409.05	16452.6	11.637	13.7783	noncoding	ENST00000398216	RP11-54O7.2	Ensembl	443	chr1	+	849550	850351		GCCAGACCCCCATCCCGCCAGGGTCACCAGctgggcatggtggcgcatgcctgtaatcct	intergenic
ASHG19A3A040792	2.4001	1.26309	2.4001	up	1290.31	2740.94	10.1991	11.4622	noncoding	ENST00000421897	RP11-12D5.5	Ensembl	457	chrX	+	27882009	27882466		ATTCTGTTCTTCGTGCTCTATGATTGCTGCATCGTTTGCATCACCACCTATGCCATCAAC	intergenic
ASHG19A3A011989	2.02849	1.02041	2.02849	up	566.746	988.374	9.01951	10.0399	noncoding	ENST00000398858	AC011544.1	Ensembl	612	chr19	+	1203207	1203822		TTGCTGCATATCGTGCTAAGGGCAAAAGTGAAGCAGGAAAGAAGGGCTCAAAGAAGAACA	intergenic
ASHG19A3A047539	2.24302	1.16544	2.24302	up	1713.7	3483.62	10.6122	11.7777	noncoding	NR_024266	LOC144438	RefSeq_NR	4024	chr12	-	49082249	49086229		GCTATCAGTTTGATATCTTGCTGTCAAGTATGTTTCTCAATCTGTATTTATCCATCCCAT	intergenic
ASHG19A3A052335	3.45468	1.78855	3.45468	up	224.22	674.533	7.6838	9.47235	noncoding	ENST00000493817	RP11-396J17.1	Ensembl	894	chr15	-	71355436	71356330		ATCATTTGTCAGATTGCTTACGCCTGTATAGAGGGGGTATGATACTCTGGCCAGCATATG	intergenic
ASHG19A3A053323	2.01926	1.01383	2.01926	up	1123.99	1967.93	10.0017	11.0156	noncoding	NR_003659	WASH3P	RefSeq_NR	2590	chr15	+	102501015	102516807	uc010scz.1,uc009vir.2,NR_028269,NR_024540,ENST00000326632,	ATAAAGAACTGAGCAGAAACCAACAGTGTGCTTTTAATAAAGGATCTCTAGCTGTGCAGG	intergenic
ASHG19A3A046495	3.20393	1.67984	3.20393	up	234.608	653.014	7.74389	9.42373	noncoding	AK096384		misc_RNA	3361	chr1	-	2567790	2571151		CACACCTGTGCCTGGCACTGTGCACACATTCTCTGTTGTTCAACTCTGCGATCAATCTGG	intergenic
ASHG19A3A016146	3.41182	1.77054	3.41182	up	1892	5994.79	10.7629	12.5334	noncoding	uc002tel.2	BC022365	UCSC_knowngene	1720	chr2	+	109301977	109303697	NR_027467,	CTCAATGGCAGGGATACTATATTGGTAATTATGTTTTCATATAGCAACCACCACAGTATA	exon sense-overlapping	NM_001193483	LIMS1	LIM and senescent cell antigen-like-containing	+	109150856	109303702
ASHG19A3A016146	3.41182	1.77054	3.41182	up	1892	5994.79	10.7629	12.5334	noncoding	uc002tel.2	BC022365	UCSC_knowngene	1720	chr2	+	109301977	109303697	NR_027467,	CTCAATGGCAGGGATACTATATTGGTAATTATGTTTTCATATAGCAACCACCACAGTATA	exon sense-overlapping	NM_001193482	LIMS1	LIM and senescent cell antigen-like-containing	+	109223616	109303702
ASHG19A3A016146	3.41182	1.77054	3.41182	up	1892	5994.79	10.7629	12.5334	noncoding	uc002tel.2	BC022365	UCSC_knowngene	1720	chr2	+	109301977	109303697	NR_027467,	CTCAATGGCAGGGATACTATATTGGTAATTATGTTTTCATATAGCAACCACCACAGTATA	exon sense-overlapping	NM_001193484	LIMS1	LIM and senescent cell antigen-like-containing	+	109237701	109303702
ASHG19A3A016146	3.41182	1.77054	3.41182	up	1892	5994.79	10.7629	12.5334	noncoding	uc002tel.2	BC022365	UCSC_knowngene	1720	chr2	+	109301977	109303697	NR_027467,	CTCAATGGCAGGGATACTATATTGGTAATTATGTTTTCATATAGCAACCACCACAGTATA	exon sense-overlapping	NM_004987	LIMS1	LIM and senescent cell antigen-like-containing	+	109204766	109303702
ASHG19A3A016146	3.41182	1.77054	3.41182	up	1892	5994.79	10.7629	12.5334	noncoding	uc002tel.2	BC022365	UCSC_knowngene	1720	chr2	+	109301977	109303697	NR_027467,	CTCAATGGCAGGGATACTATATTGGTAATTATGTTTTCATATAGCAACCACCACAGTATA	exon sense-overlapping	NM_001193485	LIMS1	LIM and senescent cell antigen-like-containing	+	109271266	109303702
ASHG19A3A016146	3.41182	1.77054	3.41182	up	1892	5994.79	10.7629	12.5334	noncoding	uc002tel.2	BC022365	UCSC_knowngene	1720	chr2	+	109301977	109303697	NR_027467,	CTCAATGGCAGGGATACTATATTGGTAATTATGTTTTCATATAGCAACCACCACAGTATA	exon sense-overlapping	NM_001193488	LIMS1	LIM and senescent cell antigen-like-containing	+	109204921	109303702
ASHG19A3A038633	2.32728	1.21865	2.32728	up	4057.71	9483.6	11.909	13.1276	noncoding	ENST00000357305	BX649597.1	Ensembl	783	chr9	+	43313713	43314502		ACAAATGCCAGCACAAATTCAACCAGTGTCACATCATCTACACCAACAGTGGTATCCTAA	intergenic
ASHG19A3A041411	2.02428	1.01741	2.02428	up	83.4896	162.531	6.27582	7.29323	noncoding	ENST00000425821	RP4-604A21.1	Ensembl	327	chr1	-	29308795	29309122		GTCAAGTTTGAAAAGAGATAAAAGACAGGCAAGAACAAGTAGTTCTTCCAGAAGCTGTGG	intronic antisense	NM_004437	EPB41	protein 4.1 isoform 6	+	29213602	29446558
ASHG19A3A041411	2.02428	1.01741	2.02428	up	83.4896	162.531	6.27582	7.29323	noncoding	ENST00000425821	RP4-604A21.1	Ensembl	327	chr1	-	29308795	29309122		GTCAAGTTTGAAAAGAGATAAAAGACAGGCAAGAACAAGTAGTTCTTCCAGAAGCTGTGG	intronic antisense	NM_001166005	EPB41	protein 4.1 isoform 1	+	29213602	29446558
ASHG19A3A041411	2.02428	1.01741	2.02428	up	83.4896	162.531	6.27582	7.29323	noncoding	ENST00000425821	RP4-604A21.1	Ensembl	327	chr1	-	29308795	29309122		GTCAAGTTTGAAAAGAGATAAAAGACAGGCAAGAACAAGTAGTTCTTCCAGAAGCTGTGG	intronic antisense	NM_203343	EPB41	protein 4.1 isoform 2	+	29213602	29446558
ASHG19A3A041411	2.02428	1.01741	2.02428	up	83.4896	162.531	6.27582	7.29323	noncoding	ENST00000425821	RP4-604A21.1	Ensembl	327	chr1	-	29308795	29309122		GTCAAGTTTGAAAAGAGATAAAAGACAGGCAAGAACAAGTAGTTCTTCCAGAAGCTGTGG	intronic antisense	NM_001166007	EPB41	protein 4.1 isoform 5	+	29213602	29446558
ASHG19A3A041411	2.02428	1.01741	2.02428	up	83.4896	162.531	6.27582	7.29323	noncoding	ENST00000425821	RP4-604A21.1	Ensembl	327	chr1	-	29308795	29309122		GTCAAGTTTGAAAAGAGATAAAAGACAGGCAAGAACAAGTAGTTCTTCCAGAAGCTGTGG	intronic antisense	NM_001166006	EPB41	protein 4.1 isoform 3	+	29241087	29391733
ASHG19A3A041411	2.02428	1.01741	2.02428	up	83.4896	162.531	6.27582	7.29323	noncoding	ENST00000425821	RP4-604A21.1	Ensembl	327	chr1	-	29308795	29309122		GTCAAGTTTGAAAAGAGATAAAAGACAGGCAAGAACAAGTAGTTCTTCCAGAAGCTGTGG	intronic antisense	NM_203342	EPB41	protein 4.1 isoform 4	+	29213602	29446558
ASHG19A3A013674	3.09373	1.62935	3.09373	up	2563.6	7384.4	11.1986	12.828	noncoding	ENST00000434096	AC007238.1	Ensembl	1741	chr2	-	58687426	58689167	NM_006083,	TAGTGCAATCATTGAGAAGAGGAAGAAGATGGAAGCTGATGGGGTTGAAGTCAAAAGACC	intergenic
ASHG19A3A034463	3.27156	1.70998	3.27156	up	858.851	2487.88	9.61758	11.3276	noncoding	ENST00000452114	RP11-746P2.1	Ensembl	360	chr7	+	64721414	64721774		CAAGGAGTGATAGTGGACAAGAAGATGCAGAAGGCTGGGCACAGTGGCTCATACCTGTAA	intergenic
ASHG19A3A032769	2.04151	1.02963	2.04151	up	44437.6	154477	15.6619	16.6916	noncoding	ENST00000339545	AC073325.2	Ensembl	159	chr7	-	45574121	45574280		ATCTTTGCTGGGACACAGCTGGAAGATAGATGCACCCTGTCTGACTACAATATCCAGAAA	intergenic
ASHG19A3A048321	2.99944	1.58469	2.99944	up	638.206	1688.16	9.18741	10.7721	noncoding	ENST00000480485	RP11-277J24.1	Ensembl	329	chr12	+	8013031	8013360	ENST00000470614,	CACAGTCCTTCTGAGGTTGTTAAACAGATTGTTTCCATCAGTATTGAGTCAGGAATTGAG	intronic antisense	NM_153449	SLC2A14	"solute carrier family 2, facilitated glucose"	-	7966396	8025495
ASHG19A3A014189	3.5716	1.83657	3.5716	up	116.736	376.999	6.75628	8.59285	noncoding	NR_027143	LOC440895	RefSeq_NR	871	chr2	-	111160495	111181393	uc010fjq.2,NR_027145,	ATGTTTTGGATGCCCAGTACAACAGAAATGTTCCATTTGAAACTCACCTCAGGCCATCAG	intergenic
ASHG19A3A015974	4.09255	2.033	4.09255	up	148.949	546.205	7.11166	9.14466	noncoding	ENST00000416118	AC128677.2	Ensembl	248	chr2	+	92145461	92151636		TTCTACTAGTCGAAAGCGGCCTCGTGAAGGGGAAGCTGAGGGTGCTGAGACCACAAAGCA	intergenic
ASHG19A3A053542	3.06561	1.61617	3.06561	up	363.784	956.041	8.37902	9.9952	noncoding	G36631		misc_RNA	495	chr16	-	19711951	19712446		CTGCTTCTTAGTGAAGATTGCATTTTAATGCTCTGACAACTCCCATTTCTTCATTGTCAG	natural antisense	NM_020314	C16orf62	hypothetical protein LOC57020	+	19566736	19712485
ASHG19A3A036141	3.54165	1.82442	3.54165	up	61.6916	203.441	5.83136	7.65578	noncoding	NR_002765	ASAP1IT1	RefSeq_NR	1179	chr8	-	131307600	131308779		CTTATGGTAAAAGCTTTCTGCAAAGCTTTTCTGCTCCTGGGTTAAGGCCTTCCAGCATCA	intron sense-overlapping	NM_018482	ASAP1	"arf-GAP with SH3 domain, ANK repeat and PH"	-	131064352	131414217
ASHG19A3A035959	2.51523	1.33069	2.51523	up	4374.76	11600	12.0218	13.3524	noncoding	ENST00000466433	CTC-788C1.1	Ensembl	354	chr8	-	94969565	94969919		TCAAGGAGCAGAAAATCGTTGTGAAAGTATTGAAGGCATAAGCACAGAGTCGGAAAGCTA	intergenic
ASHG19A3A048344	2.23107	1.15774	2.23107	up	492.624	940.095	8.81242	9.97015	noncoding	NR_026971	LOC144571	RefSeq_NR	2187	chr12	+	9217772	9220651		TATGGACTCTCTGAGGTTTGACAGAGTCAGCGGCCCTCTCCAATAAATGTGTTTTTCTAT	natural antisense	NM_000014	A2M	alpha-2-macroglobulin precursor	-	9220303	9268558
ASHG19A3A040726	3.398	1.76469	3.398	up	11770.9	58456.6	13.4739	15.2386	noncoding	ENST00000416049	RP5-958B3.2	Ensembl	131	chrX	+	18359335	18359466		GGAGAACACCCTGCTGACCAAAGAGGCCATTGAGCAGGAGAAGCGGGTGAAATTTCCTAA	intronic antisense	NM_006089	SCML2	sex comb on midleg-like protein 2	-	18257432	18372844
ASHG19A3A008429	2.16327	1.11321	2.16327	up	7650.3	19050.6	12.8242	13.9374	noncoding	ENST00000431587	RP11-177A2.5	Ensembl	345	chr1	-	179004442	179004787		ATTGTGCAATTCACAGCAAAGTAGTCAGGAATCAATCTCATGAAGCCCACGAGGACCGAA	intronic antisense	NM_014864	FAM20B	glycosaminoglycan xylosylkinase precursor	+	178995073	179045702
ASHG19A3A024384	2.77822	1.47416	2.77822	up	56.2704	150.622	5.70044	7.1746	noncoding	ENST00000510079	RP11-721G13.1	Ensembl	1008	chr4	-	79102192	79103200	NM_001018067,ENST00000396021,	GCAGTGGAAGAAGGGATTTGTTTTCATAAATCAAAGAGTGAAGAGGCTTATGCTGAGGAT	intronic antisense	NM_025074	FRAS1	extracellular matrix protein FRAS1 isoform 1	+	78978723	79465423
ASHG19A3A024384	2.77822	1.47416	2.77822	up	56.2704	150.622	5.70044	7.1746	noncoding	ENST00000510079	RP11-721G13.1	Ensembl	1008	chr4	-	79102192	79103200	NM_001018067,ENST00000396021,	GCAGTGGAAGAAGGGATTTGTTTTCATAAATCAAAGAGTGAAGAGGCTTATGCTGAGGAT	intronic antisense	NM_001166133	FRAS1	extracellular matrix protein FRAS1 isoform 2	+	78978723	79367787
ASHG19A3A033509	2.45608	1.29636	2.45608	up	9345.57	29181.9	13.1475	14.4438	noncoding	ENST00000393266	RP11-212P7.1	Ensembl	448	chr7	-	128210294	128210742	uc009wzz.1,NR_026667,NM_001014,ENST00000492704,ENST00000483812,ENST00000477729,ENST00000460492,ENST00000456185,ENST00000435599,ENST00000408001,ENST00000400398,	TTTCTACTGGTACCTTACCAATGAGGGTATCCAGTATCTCCGTGATTACCTTCATCTGCC	intergenic
ASHG19A3A026345	2.13849	1.09659	2.13849	up	108.563	216.472	6.6526	7.74919	noncoding	AK130554		misc_RNA	3938	chr4	+	181093602	181095668		GCACACAAGGGCACTCCAGCTATGAAAGTTTGATAGATTTTATACTGAAGAAGTATAAAA	intergenic
ASHG19A3A028380	2.64851	1.40518	2.64851	up	12665.5	48083.5	13.5945	14.9997	noncoding	ENST00000457967	RP11-389O22.4	Ensembl	410	chr1	+	113711615	113712025		TGGCTCCATGACCAAGATCGATGGGGGACATCAAAGATGGCATCATGCCCAGCCACTTCA	intergenic
ASHG19A3A032827	2.16948	1.11735	2.16948	up	429.143	801.543	8.61229	9.72964	noncoding	AK098425		misc_RNA	1895	chr7	-	55521258	55523150		GACTGGATGTGGGTGATGAATAAATGAGGATTTGGTATACTATTTTCTCTACTTCTTATG	intergenic
ASHG19A3A051950	3.0946	1.62975	3.0946	up	225.289	611.603	7.69104	9.3208	noncoding	AK021616		misc_RNA	1938	chr15	-	31773280	31775217		AGCCAGCTTCTCCTCTAGAAACGATGCTTTTTTCCCTAACTAAAGAGCAGCAAAAACAAA	intergenic
ASHG19A3A020242	3.33863	1.73925	3.33863	up	3466.61	12010.9	11.6599	13.3992	noncoding	ENST00000330974	AP000358.3	Ensembl	231	chr22	+	25108258	25108489		TAGGCAAGGACTGGCATCGGCCCTGCCTGAAGTGTGAGAAATGTGGGAAGACGCTGACTT	intergenic
ASHG19A3A038488	4.8078	2.26538	4.8078	up	2171.26	10390.2	10.9635	13.2289	noncoding	NR_003573	ANXA2P2	RefSeq_NR	1310	chr9	+	33624222	33625530		AAATGCTTTCCTGAACCTGGTCCAGCGCATTCAGAACAAGCCCTTGTATTTTGCTGATCA	intergenic
ASHG19A3A007178	2.71581	1.44138	2.71581	up	232.863	556.927	7.7338	9.17518	noncoding	NR_015366	LOC388796	RefSeq_NR	1045	chr20	-	37049266	37063962		GAAGAGCCTCTGGAAATCTGCGTGGGTCTCAGCCTTAGATCCAAGGACAGTCCAAGGAAG	intergenic
ASHG19A3A012744	2.84169	1.50675	2.84169	up	4861.09	15358	12.1889	13.6956	noncoding	ENST00000480396	AC005204.2	Ensembl	498	chr19	+	43174156	43174968		TACCTTACCAATGAAGGCATCCAGTATCTCCGTGATTATCTTCATCTGCCCCTGGAGATT	intergenic
ASHG19A3A007353	2.7603	1.46482	2.7603	up	984.742	2395.05	9.80783	11.2726	noncoding	NR_024598	C11orf73	RefSeq_NR	949	chr11	+	86013252	86056984	NM_016401,	ATTCCGGCAAATGTGGTTCTGAAATGGTATGAAAACTTTCAAAGACGACTAGCACAGAAC	exon sense-overlapping	NM_016401	C11orf73	"lethal, Chr 7, Rinchik 6"	+	86013252	86056985
ASHG19A3A017634	2.93699	1.55434	2.93699	up	4451.9	14124.5	12.0489	13.6032	noncoding	CR612530		misc_RNA	1057	chr20	-	35518618	35519673		CCACTTCAACTGGGTAAGGGAAACAGCTGCAATAAAGCTTCGTGAATATATATCTCCATC	intronic antisense	NM_080628	C20orf118	hypothetical protein LOC140711	+	35504569	35522632
ASHG19A3A018717	3.07134	1.61887	3.07134	up	335.345	891.5	8.26945	9.88832	noncoding	ENST00000406049	RPL10P1	Ensembl	642	chr21	-	28792698	28793342		ACCAAATTCAATGCGAATGAATCTGAAGACATGGTGGCTGAGAAGCAGCTCATCCCAGAT	intergenic
ASHG19A3A028092	3.89422	1.96134	3.89422	up	118.485	417.029	6.77742	8.73875	noncoding	ENST00000505001	RP11-1023L17.2	Ensembl	3669	chr5	+	34189867	34193758	ENST00000502532,	GTGAGAAGAATGTTTTGTGTTCGAAATTGTTTGAGGGGTTTGGGTTTATTTTTGTTGGTT	intergenic
ASHG19A3A028340	2.56209	1.35732	2.56209	up	108.449	256.757	6.65046	8.00778	noncoding	ENST00000425725	RP11-497H16.2	Ensembl	597	chr5	+	69784672	69786785	ENST00000507312,ENST00000505635,ENST00000505635,ENST00000505635,ENST00000505635,ENST00000505635,ENST00000505001,ENST00000505001,ENST00000505001,ENST00000504077,ENST00000504077,ENST00000504077,ENST00000504059,ENST00000502532,ENST00000502532,ENST00000502532,ENST00000502466,ENST00000502466,ENST00000502466,ENST00000502466,ENST00000456583,ENST00000442958,ENST00000406100,	TTCTAAAGCACCCACTATGGATGCACAGCAGGACAGACCCAAGTCCCAAGACTGCCTGGG	intergenic
ASHG19A3L0000820	2.28822	1.19423	2.28822	up	84.195	183.68	6.28925	7.48347	noncoding	BC036541	lincRNA-ZNF280D	lincRNA	4811	chr15	-	56945018	57210767		CTACAGATTTTGTGTAGCTGCCTATTTGTAGATTTTAAATTTGGCTGTTACTAAGCCCAT	exon sense-overlapping	NM_001002843	ZNF280D	zinc finger protein 280D isoform 2	-	56922373	57025787
ASHG19A3L0000820	2.28822	1.19423	2.28822	up	84.195	183.68	6.28925	7.48347	noncoding	BC036541	lincRNA-ZNF280D	lincRNA	4811	chr15	-	56945018	57210767		CTACAGATTTTGTGTAGCTGCCTATTTGTAGATTTTAAATTTGGCTGTTACTAAGCCCAT	exon sense-overlapping	NM_017661	ZNF280D	zinc finger protein 280D isoform 1	-	56922373	57025787
ASHG19A3L0000820	2.28822	1.19423	2.28822	up	84.195	183.68	6.28925	7.48347	noncoding	BC036541	lincRNA-ZNF280D	lincRNA	4811	chr15	-	56945018	57210767		CTACAGATTTTGTGTAGCTGCCTATTTGTAGATTTTAAATTTGGCTGTTACTAAGCCCAT	bidirectional	NM_207036	TCF12	transcription factor 12 isoform a	+	57210832	57580714
ASHG19A3L0000820	2.28822	1.19423	2.28822	up	84.195	183.68	6.28925	7.48347	noncoding	BC036541	lincRNA-ZNF280D	lincRNA	4811	chr15	-	56945018	57210767		CTACAGATTTTGTGTAGCTGCCTATTTGTAGATTTTAAATTTGGCTGTTACTAAGCCCAT	bidirectional	NM_207037	TCF12	transcription factor 12 isoform a	+	57210832	57580714
ASHG19A3L0000820	2.28822	1.19423	2.28822	up	84.195	183.68	6.28925	7.48347	noncoding	BC036541	lincRNA-ZNF280D	lincRNA	4811	chr15	-	56945018	57210767		CTACAGATTTTGTGTAGCTGCCTATTTGTAGATTTTAAATTTGGCTGTTACTAAGCCCAT	exon sense-overlapping	NM_001002844	ZNF280D	zinc finger protein 280D isoform 3	-	56991557	57025787
ASHG19A3L0000820	2.28822	1.19423	2.28822	up	84.195	183.68	6.28925	7.48347	noncoding	BC036541	lincRNA-ZNF280D	lincRNA	4811	chr15	-	56945018	57210767		CTACAGATTTTGTGTAGCTGCCTATTTGTAGATTTTAAATTTGGCTGTTACTAAGCCCAT	bidirectional	NM_207038	TCF12	transcription factor 12 isoform b	+	57210832	57580714
ASHG19A3L0000820	2.28822	1.19423	2.28822	up	84.195	183.68	6.28925	7.48347	noncoding	BC036541	lincRNA-ZNF280D	lincRNA	4811	chr15	-	56945018	57210767		CTACAGATTTTGTGTAGCTGCCTATTTGTAGATTTTAAATTTGGCTGTTACTAAGCCCAT	bidirectional	NM_003205	TCF12	transcription factor 12 isoform b	+	57210832	57580714
ASHG19A3A031344	3.05431	1.61085	3.05431	up	593.908	1599.85	9.08841	10.6993	noncoding	ENST00000453426	XXbac-BPG246D15.8	Ensembl	1267	chr6	+	32811862	32814272		CTATTGAATAGTCCTCTTCTCTACCCATGGACTTGGCATTTTTATATTCGATTTTAAGGA	bidirectional	NM_148919	PSMB8	proteasome subunit beta type-8 isoform E2	-	32808493	32811816
ASHG19A3A031344	3.05431	1.61085	3.05431	up	593.908	1599.85	9.08841	10.6993	noncoding	ENST00000453426	XXbac-BPG246D15.8	Ensembl	1267	chr6	+	32811862	32814272		CTATTGAATAGTCCTCTTCTCTACCCATGGACTTGGCATTTTTATATTCGATTTTAAGGA	natural antisense	NM_000593	TAP1	antigen peptide transporter 1	-	32812985	32821748
ASHG19A3A031344	3.05431	1.61085	3.05431	up	593.908	1599.85	9.08841	10.6993	noncoding	ENST00000453426	XXbac-BPG246D15.8	Ensembl	1267	chr6	+	32811862	32814272		CTATTGAATAGTCCTCTTCTCTACCCATGGACTTGGCATTTTTATATTCGATTTTAAGGA	intronic antisense	NM_004159	PSMB8	proteasome subunit beta type-8 isoform E1	-	32808493	32812712
CUST_931_PI426073487	3.59061	1.84423	3.59061	up	81.5072	270.282	6.24047	8.0847	noncoding	uc.452-	uc.452	UCR	204	chr19	-	31827946	31828150		GCAGGTGAATAGCATTAGAAACACGCTATTGTCAGACGGAATAATTAATCAAAGAGAGAA	intron sense-overlapping	NM_020856	TSHZ3	teashirt homolog 3	-	31765850	31840190
ASHG19A3A044719	2.51738	1.33192	2.51738	up	4431.56	11819.5	12.0397	13.3716	noncoding	ENST00000411837	RP5-882O7.4	Ensembl	492	chr1	-	45453905	45454397	ENST00000405422,ENST00000394437,	TAAAGCATACACATCCTGGCATCTTGTCCATGGCAAATGCTGGACCCAACACAAATGGTT	intergenic
ASHG19A3A033949	3.93388	1.97595	3.93388	up	340.821	1161.02	8.28983	10.2658	noncoding	uc003srb.1	CR609701	UCSC_knowngene	3988	chr7	+	7284224	7288212		AAACTAATCTTACTGCTAAGCAGTGTGTTGTACTACATAGTGAATGTTCGTGTTTTGGAA	exon sense-overlapping	NM_020156	C1GALT1	glycoprotein-N-acetylgalactosamine	+	7222245	7288251
ASHG19A3A045346	2.27889	1.18833	2.27889	up	9619.41	27448.1	13.1862	14.3746	noncoding	ENST00000416622	RP11-329A14.2	Ensembl	474	chr1	-	48962934	48963408		ACACTTTGTGACAATCAGTGAAAAGGAGCCTGAGCTGCTGGAACCTCTTCCTTATGATTC	intergenic
ASHG19A3A043853	2.12114	1.08484	2.12114	up	56.9393	118.561	5.71683	6.80168	noncoding	ENST00000434057	RP11-517P14.6	Ensembl	1234	chr10	+	43977223	43978457		TCACACAGGAGAGAGACCCTTTGAATGCAATGAATGTCAAAAATCCTTCTCTGTGAAGTC	intergenic
ASHG19A3A031950	3.0489	1.60829	3.0489	up	304.19	803.995	8.12534	9.73363	noncoding	AF136408		RNAdb	2416	chr6	+	111921077	111923493		GGACTAATGGGAACACACTGACTCCATCACATTAGAAGTTATAATAAACATTTAGAGAAC	intronic antisense	NM_147686	TRAF3IP2	adapter protein CIKS isoform 2	-	111880142	111927474
ASHG19A3A031950	3.0489	1.60829	3.0489	up	304.19	803.995	8.12534	9.73363	noncoding	AF136408		RNAdb	2416	chr6	+	111921077	111923493		GGACTAATGGGAACACACTGACTCCATCACATTAGAAGTTATAATAAACATTTAGAGAAC	intronic antisense	NM_001164281	TRAF3IP2	adapter protein CIKS isoform 3	-	111880142	111927474
ASHG19A3A045653	3.79588	1.92443	3.79588	up	183.317	616.649	7.40753	9.33197	noncoding	AK098142		misc_RNA	2364	chr11	-	106555150	106557515		AATGTACTACCCTGTATCTTCTTTGTGGACCTTAATCATTAGGTAACATTGGCCATAATA	intergenic
ASHG19A3A012590	2.39337	1.25904	2.39337	up	89.7834	201.075	6.38031	7.63935	noncoding	ENST00000418525	RP11-169K16.4	Ensembl	639	chr1	-	16066545	16076391		TTCAAAGGGTGCTGCTGGAGCTGTCCAAGGGGTGGCCATTCTTCGGGGAATGAGCTGAAA	natural antisense	NM_207348	SLC25A34	solute carrier family 25 member 34	+	16062808	16067884
ASHG19A3A012590	2.39337	1.25904	2.39337	up	89.7834	201.075	6.38031	7.63935	noncoding	ENST00000418525	RP11-169K16.4	Ensembl	639	chr1	-	16066545	16076391		TTCAAAGGGTGCTGCTGGAGCTGTCCAAGGGGTGGCCATTCTTCGGGGAATGAGCTGAAA	intronic antisense	NM_001013641	TMEM82	transmembrane protein 82	+	16068916	16074477
ASHG19A3A021706	2.356	1.23634	2.356	up	4171.76	9924.83	11.9448	13.1812	noncoding	ENST00000477300	RP11-8J23.1	Ensembl	404	chr3	-	143574580	143574984		TCAGTCTGTCCAACCTGCAGGTCACTCGACCTACAGTTGAGATAAATTTCAAAATGCCTC	intergenic
ASHG19A3L0001340	10.4966	3.39185	10.4966	up	161.802	1513.79	7.22811	10.62	noncoding	AK094780	lincRNA-GALNTL2-1	lincRNA	3105	chr3	+	15935568	16270147	NM_054110,	GTACCAGCACAATTTGAGCATTCCCATTAACAAAGGTGTTCACAGTTGAGAAACTCTCCT	exon sense-overlapping	NM_054110	GALNTL2	polypeptide	+	16216183	16271253
ASHG19A3A013903	2.4078	1.26771	2.4078	up	135.473	299.459	6.97212	8.23983	noncoding	ENST00000455464	RP4-669L17.4	Ensembl	573	chr1	+	334139	342806	uc010zpe.1,uc010qvj.1,uc003fza.2,uc002yio.1,uc002fqw.2,NR_024437,NM_207366,ENST00000513445,ENST00000509776,ENST00000508026,ENST00000499986,ENST00000477740,ENST00000440200,ENST00000439401,ENST00000436899,ENST00000432557,ENST00000427373,ENST00000425473,	AAGCTGCCTCTGAAGCACTGCAGACTCAGCTGAGCACCGATACAAAGAAAGACAAACATC	intergenic
ASHG19A3L0000699	2.0997	1.07018	2.0997	up	4513.02	9642.08	12.0707	13.1409	noncoding	CR749802	lincRNA-MBNL2-1	lincRNA	4571	chr13	+	97794089	98046372	NM_207304,NM_144778,	TGTATCAATACTATGTTTTGGTTGTAATATTCAGTTCACCCACCCAATGTACAACCAATG	exon sense-overlapping	NM_144778	MBNL2	muscleblind-like protein 2 isoform 1	+	97874573	98046374
ASHG19A3L0000699	2.0997	1.07018	2.0997	up	4513.02	9642.08	12.0707	13.1409	noncoding	CR749802	lincRNA-MBNL2-1	lincRNA	4571	chr13	+	97794089	98046372	NM_207304,NM_144778,	TGTATCAATACTATGTTTTGGTTGTAATATTCAGTTCACCCACCCAATGTACAACCAATG	exon sense-overlapping	NM_207304	MBNL2	muscleblind-like protein 2 isoform 3	+	97874573	98046374
ASHG19A3A017971	4.68981	2.22953	4.68981	up	177.189	728.827	7.35969	9.58922	noncoding	ENST00000427639	RPL7P2	Ensembl	268	chr20	+	2056200	2056468		TTATTCTCTCCACGAGGTGGAATGAAGTAACAGACCACCCATTTCACAGAAGGTGGAGAT	intergenic
ASHG19A3A014715	4.61966	2.20779	4.61966	up	136.661	563.491	6.98501	9.19279	noncoding	ENST00000448912	AC104076.2	Ensembl	469	chr2	-	181803556	181804025		ATTATTGTGAAGGCCAAATTCTTCAGCAGAAGAGCCAAGGAGACGATTAAGGGTGAAAGA	intergenic
ASHG19A3L0000477	2.06515	1.04625	2.06515	up	981.913	1775.17	9.80321	10.8495	noncoding	EC575964	lincRNA-TMTC1	lincRNA	106	chr12	-	30748167	30748215	NM_005095,	ATTCCATCTGTGTTTGTCATTTCTGACTGGAAAACTTCTTACTCCATACCTTGTTCGATA	intergenic
ASHG19A3A007925	2.03336	1.02387	2.03336	up	102.365	195.518	6.56559	7.58946	noncoding	ENST00000417354	RP5-1116C7.1	Ensembl	568	chr1	-	172109460	172113934		CAGAGGAAACTAACCAACAGTGAGCATCTTCAACTAAAACTACCCCTGGATGTAATAAGT	intronic antisense	NM_015569	DNM3	dynamin-3 isoform a	+	171810620	172381857
ASHG19A3A007925	2.03336	1.02387	2.03336	up	102.365	195.518	6.56559	7.58946	noncoding	ENST00000417354	RP5-1116C7.1	Ensembl	568	chr1	-	172109460	172113934		CAGAGGAAACTAACCAACAGTGAGCATCTTCAACTAAAACTACCCCTGGATGTAATAAGT	intronic antisense	NM_001136127	DNM3	dynamin-3 isoform b	+	171810620	172381857
ASHG19A3A049292	2.15538	1.10794	2.15538	up	3936.38	8242.46	11.8556	12.9636	noncoding	uc001uoa.1	AK098818	UCSC_knowngene	1936	chr13	-	21946715	21948651		CTTTGTCTTTTGGCTGGCCTAACCTACATTGACATGTACACAGAACATTTTAAAACTTTT	exon sense-overlapping	NM_153251	ZDHHC20	probable palmitoyltransferase ZDHHC20	-	21946709	22033508
ASHG19A3A033313	2.33968	1.22631	2.33968	up	1870.77	4026.8	10.7463	11.9726	noncoding	ENST00000426806	RP11-401L13.5	Ensembl	265	chr7	-	102792453	102792772	ENST00000455510,ENST00000440453,ENST00000434984,ENST00000399415,ENST00000333351,	TGTTAAAGCCACCAAGCACCAGATCAAACAGGCTGTGAAGAAGCTCTATGACACTGATGT	intergenic
ASHG19A3A055060	3.97401	1.99059	3.97401	up	425.909	1477.98	8.59992	10.5905	noncoding	uc001aqd.2	CR604408	UCSC_knowngene	951	chr1	-	9732485	9747627		GCTCCATCAATACCTGTGATGGACTAAATGgcacggtggctcacacctataatctcacca	intronic antisense	NM_005026	PIK3CD	"phosphatidylinositol-4,5-bisphosphate 3-kinase"	+	9711789	9789172
ASHG19A3A000379	3.31137	1.72743	3.31137	up	7049.85	28732.6	12.6957	14.4232	noncoding	ENST00000462180	AC055740.2	Ensembl	465	chr3	-	113307594	113309036		cctgtaatcccagcacttttggaggccaagCATTATTGTGGTAATAGATAACGAATACAA	intronic antisense	NM_017699	SIDT1	SID1 transmembrane family member 1 precursor	+	113251217	113348422
ASHG19A3A029499	5.90244	2.56131	5.90244	up	184.811	945.963	7.4167	9.97801	noncoding	NR_002174	CMAH	RefSeq_NR	2484	chr6	-	25081296	25138051		ACACGTGGTGAAGAATGGTCTACTCTGGGATGAGTTGTATATAGGATTCCAAACACGGCT	intergenic
ASHG19A3A009982	5.18852	2.37532	5.18852	up	202.079	910.397	7.54424	9.91956	noncoding	NR_027058	C17orf86	RefSeq_NR	2183	chr17	+	75084724	75091067		CTCTGCATGCTTGTCTTTAGAGGAAGGAAATGTATTAATTGCCCAAAGTAATATATTGTG	exon sense-overlapping	NM_001204410	SEC14L1	SEC14-like protein 1 isoform a	+	75085234	75213181
ASHG19A3A009982	5.18852	2.37532	5.18852	up	202.079	910.397	7.54424	9.91956	noncoding	NR_027058	C17orf86	RefSeq_NR	2183	chr17	+	75084724	75091067		CTCTGCATGCTTGTCTTTAGAGGAAGGAAATGTATTAATTGCCCAAAGTAATATATTGTG	exon sense-overlapping	NM_001204408	SEC14L1	SEC14-like protein 1 isoform b	+	75084724	75213181
ASHG19A3A027042	2.3649	1.24178	2.3649	up	219.597	464.42	7.65301	8.8948	noncoding	CR608789		misc_RNA	1645	chr5	-	80709892	80711537		CAGAATAAAGGTTGGACTCATTTTGCTTATCCCAGTCATTAAAATGTTGTGATCTGTTTC	intergenic
ASHG19A3A054896	2.70256	1.43432	2.70256	up	164.855	402.935	7.25653	8.69085	noncoding	NR_024402	MGC23284	RefSeq_NR	2447	chr16	+	88729780	88741913		TTGGATGCAACCTTTGAAAGAGATGCTTCCAGTAAACCCCATCGGTTAAGATCAGCTGTC	bidirectional	NM_002461	MVD	diphosphomevalonate decarboxylase	-	88718347	88729495
ASHG19A3A013519	2.52479	1.33616	2.52479	up	78.2029	187.792	6.18307	7.51924	noncoding	ENST00000449978	RP11-452J6.2	Ensembl	210	chr1	-	246795557	246795780		CTGTGGCGCACGTTGCCAAGCTCAAAAAGGCAAAGGCTAAAGAACATGCCGCTAAACTGG	intronic antisense	NM_152609	CNST	consortin isoform 1	+	246729638	246831884
ASHG19A3A013519	2.52479	1.33616	2.52479	up	78.2029	187.792	6.18307	7.51924	noncoding	ENST00000449978	RP11-452J6.2	Ensembl	210	chr1	-	246795557	246795780		CTGTGGCGCACGTTGCCAAGCTCAAAAAGGCAAAGGCTAAAGAACATGCCGCTAAACTGG	intronic antisense	NM_001139459	CNST	consortin isoform 2	+	246729638	246811544
ASHG19A3A015874	3.35722	1.74727	3.35722	up	702.968	2065.14	9.32691	11.0742	noncoding	ENST00000422418	RPL38	Ensembl	418	chr2	+	78015507	78020213		GGCAGTGAAGGAACTAAAATGAACCAGACACACTGATTTGTGCTGTATTAAAATACTAAA	intergenic
ASHG19A3A010120	2.75423	1.46165	2.75423	up	1934.21	4969.39	10.7942	12.2559	noncoding	ENST00000490908	RP11-838N2.2	Ensembl	477	chr18	-	3406339	3406816		CCCCAGCATGCTGTTGGCATTGCATAAACAAACAAGGGCAAGATTCTTGCCAAAAGAATT	intergenic
ASHG19A3A019088	2.41553	1.27234	2.41553	up	909.716	1913.57	9.70042	10.9728	noncoding	ENST00000282964	AP000568.2	Ensembl	442	chr21	+	21112022	21112464	NM_173829,	CCTAAAAGGGACATAGTTTTGGATGTCAGCAGTACAAGTAGTGAAGATAGAGATGAAGAG	intergenic
ASHG19A3A052684	4.94312	2.30542	4.94312	up	319.63	1388.93	8.20285	10.5083	noncoding	uc010azc.2	LOC440248	UCSC_knowngene	3113	chr15	+	28899419	28930408	NR_002824,NM_004667,AF041081,	ATTGGTGATAAAGTGCGGGTCAAAGCCTCTGTCACCACACCAAAATACAAATGGGGATCT	intergenic
ASHG19A3A039138	4.55148	2.18634	4.55148	up	132.434	539.974	6.94174	9.12807	noncoding	ENST00000428292	RP11-18B16.2	Ensembl	1223	chr9	+	116413235	116445135		TATAAAACCTGATGGGAGGGGAGGTTGCAGTAAAAGCCTTGGAGATGAAAACACTGGACA	intergenic
ASHG19A3A013505	4.50223	2.17064	4.50223	up	826.439	3356.39	9.55781	11.7285	noncoding	AK055915		RNAdb	2192	chr2	-	37869086	37871279		GCATCATGTGGAAGAATGGGAACTATGCTTACTTTATGAAGTGATGTATAACACAATGAA	exon sense-overlapping	NM_006449	CDC42EP3	cdc42 effector protein 3	-	37870742	37899326
ASHG19A3A009385	2.35407	1.23516	2.35407	up	926.357	1895.32	9.72471	10.9599	noncoding	BC016000		misc_RNA	1182	chr1	-	200374082	200375228		CTTAGGGCATCCAAATAAAAAACAATAGGGTAAACATCCCCAAAACCCACCTTTAAAAAA	intergenic
ASHG19A3A034203	2.10175	1.07159	2.10175	up	9971.04	25667.6	13.2373	14.3089	noncoding	ENST00000419980	AC006960.5	Ensembl	153	chr7	+	36345239	36345513		ACAAAAACAAAATTGTCCCATTCCCCAGTGGATTCAGATGGAAACTGGTAATAAAGACAG	intergenic
ASHG19A3A055106	3.40862	1.76919	3.40862	up	246.742	726.889	7.81663	9.58582	noncoding	uc001tsw.2	C12orf47	UCSC_knowngene	1955	chr12	-	112277573	112280706		GATGGATTTAAGACATATTTTGGAGCGGAAAGTGACCAGAAGAGGTGTGCAGTTTCCAGG	natural antisense	NM_003668	MAPKAPK5	MAP kinase-activated protein kinase 5 isoform 1	+	112280278	112331228
ASHG19A3A055106	3.40862	1.76919	3.40862	up	246.742	726.889	7.81663	9.58582	noncoding	uc001tsw.2	C12orf47	UCSC_knowngene	1955	chr12	-	112277573	112280706		GATGGATTTAAGACATATTTTGGAGCGGAAAGTGACCAGAAGAGGTGTGCAGTTTCCAGG	natural antisense	NM_139078	MAPKAPK5	MAP kinase-activated protein kinase 5 isoform 2	+	112280278	112331228
ASHG19A3A007387	2.10653	1.07487	2.10653	up	718.212	1304.25	9.35317	10.428	noncoding	NR_026598	NENF	RefSeq_NR	934	chr1	+	212606228	212619719		AGCTGGCCCGCTATGGCGGGGAGGAGAGTTTTATGGACGAGGAGCCCCCTACAATGCCTT	exon sense-overlapping	NM_013349	NENF	neudesin precursor	+	212606228	212619721
ASHG19A3A016348	2.10644	1.07481	2.10644	up	7833.35	19034.1	12.8605	13.9353	noncoding	ENST00000429272	AC068137.13	Ensembl	584	chr2	+	131051394	131051978		AAACAAGTGGATTGTCATGGAACACATCAACAAGCTGAAGGCAGACAAGGCCCACAAGAA	intergenic
ASHG19A3A017468	2.39658	1.26098	2.39658	up	72.0785	165.385	6.05952	7.3205	noncoding	CR618381		misc_RNA	1176	chr20	-	23052183	23053359		CATGAATGCAAGAAAATCAGTATCTGTTCTAGGTATGTTATTCTGGTCCTGCTTATATCT	intergenic
ASHG19A3A038095	2.21142	1.14497	2.21142	up	556.606	1054.84	8.99152	10.1365	noncoding	uc004bvv.1	Y16709	UCSC_knowngene	154	chr9	-	131457267	131457421		TACAGAGAAAGGAGGAAAAAAGCTAGAATTCTATGCACTACTACACAGGGGCCTAGCACC	natural antisense	NM_003011	SET	protein SET isoform 2	+	131451508	131458675
ASHG19A3A038095	2.21142	1.14497	2.21142	up	556.606	1054.84	8.99152	10.1365	noncoding	uc004bvv.1	Y16709	UCSC_knowngene	154	chr9	-	131457267	131457421		TACAGAGAAAGGAGGAAAAAAGCTAGAATTCTATGCACTACTACACAGGGGCCTAGCACC	natural antisense	NM_001122821	SET	protein SET isoform 1	+	131445933	131458675
ASHG19A3A009555	2.46397	1.30098	2.46397	up	792.873	1712.51	9.49789	10.7989	noncoding	NR_003108	NBR2	RefSeq_NR	1371	chr17	+	41277599	41297123	NM_004965,ENST00000431116,	TGCAAAAGTGGAAGCGAAGCCGAAAAAGGCAGCAGCGAAGGATAAATTTTCAGACACAAA	bidirectional	NM_007300	BRCA1	breast cancer type 1 susceptibility protein	-	41196311	41277500
ASHG19A3A009555	2.46397	1.30098	2.46397	up	792.873	1712.51	9.49789	10.7989	noncoding	NR_003108	NBR2	RefSeq_NR	1371	chr17	+	41277599	41297123	NM_004965,ENST00000431116,	TGCAAAAGTGGAAGCGAAGCCGAAAAAGGCAGCAGCGAAGGATAAATTTTCAGACACAAA	bidirectional	NM_007299	BRCA1	breast cancer type 1 susceptibility protein	-	41196311	41277468
ASHG19A3A009555	2.46397	1.30098	2.46397	up	792.873	1712.51	9.49789	10.7989	noncoding	NR_003108	NBR2	RefSeq_NR	1371	chr17	+	41277599	41297123	NM_004965,ENST00000431116,	TGCAAAAGTGGAAGCGAAGCCGAAAAAGGCAGCAGCGAAGGATAAATTTTCAGACACAAA	bidirectional	NM_007294	BRCA1	breast cancer type 1 susceptibility protein	-	41196311	41277500
ASHG19A3A009555	2.46397	1.30098	2.46397	up	792.873	1712.51	9.49789	10.7989	noncoding	NR_003108	NBR2	RefSeq_NR	1371	chr17	+	41277599	41297123	NM_004965,ENST00000431116,	TGCAAAAGTGGAAGCGAAGCCGAAAAAGGCAGCAGCGAAGGATAAATTTTCAGACACAAA	bidirectional	NM_007297	BRCA1	breast cancer type 1 susceptibility protein	-	41196311	41277468
ASHG19A3A029363	2.24257	1.16515	2.24257	up	4421.64	10147.8	12.036	13.2012	noncoding	ENST00000407959	RP1-182O16.1	Ensembl	354	chr6	-	5788578	5788932		GAGCAGAAAATTGTTGTGAAAGTGTTGAAGGCACATGCACGGGGTCAGAAAGCTAAATAA	intergenic
ASHG19A3A037678	5.41176	2.4361	5.41176	up	50.2181	251.566	5.54046	7.97656	noncoding	ENST00000425666	RP11-389K14.3	Ensembl	1013	chr9	-	93063183	93195771		TGGCAGGGGGTGGGTATAACCTATGTCAGTGTTTTTCAATGTGAGCAAATTTTAATAAAC	intergenic
ASHG19A3A027637	2.20566	1.14121	2.20566	up	3618.31	7616.05	11.7251	12.8663	noncoding	ENST00000460082	CTB-47B8.1	Ensembl	306	chr5	-	157358265	157358571		AAACATTGAAGACGTCATTGCCAAGAGTATTAGCAAGCTTGCCAATGTACCTGCTGGTGG	intergenic
ASHG19A3A043032	2.31683	1.21215	2.31683	up	6731.33	17646	12.6305	13.8427	noncoding	ENST00000439728	RP11-40F6.3	Ensembl	269	chr10	-	81975606	81975875	ENST00000461060,ENST00000442381,ENST00000428553,ENST00000393374,	CTATGGAAGGAGTCTCAGGCCAAGGATGTCATCGAACAGTACTTCAAATGCAAGAAATGA	intergenic
ASHG19A3A019663	2.36666	1.24285	2.36666	up	82.098	184.946	6.25114	7.49399	noncoding	ENST00000423857	CTA-85E5.7	Ensembl	315	chr22	-	30501082	30501397		AAGGTCTCCAAGGACAAAAGGGCCTTCAAGTTCATCAAGAAAAAGGTGGGAACACACATC	intronic antisense	NM_152510	HORMAD2	HORMA domain-containing protein 2	+	30476452	30573062
ASHG19A3A049725	2.03394	1.02428	2.03394	up	6233.14	13452.1	12.5167	13.541	noncoding	ENST00000397724	RP11-430K10.1	Ensembl	495	chr13	-	91924334	91924831	ENST00000510729,ENST00000505144,ENST00000491837,ENST00000486414,ENST00000464473,ENST00000448870,ENST00000446082,ENST00000441944,ENST00000428093,ENST00000405422,ENST00000403866,ENST00000395084,ENST00000394293,ENST00000358455,ENST00000356912,ENST00000326259,	GGGAGAAATTTGATGACGAGAACTTCATCCTAAAGCATACAGGTCCTGGCATCTTGTCCA	intergenic
ASHG19A3A031039	2.2726	1.18434	2.2726	up	42.9701	97.32	5.31262	6.49696	noncoding	ENST00000402485	RP11-254A17.1	Ensembl	463	chr6	+	19143928	19144391		GAAAATGATAAGATAAAGAAAGACGCCGAAGAGAAAGGTACCTGGGTTCAATTGAAGCGC	intergenic
ASHG19A3A037344	3.09089	1.62802	3.09089	up	534.966	1444.92	8.93	10.558	noncoding	ENST00000422509	RP11-405L18.4	Ensembl	473	chr9	-	37490417	37490890		ATGATTAGAAAAAGACAGAAGCAAAAGAGAAAGGTACCTGGGTTCAACTGAAGCGCCAGC	intronic antisense	NM_022490	POLR1E	DNA-directed RNA polymerase I subunit RPA49	+	37485944	37503693
ASHG19A3A049640	3.09082	1.62799	3.09082	up	504.024	1350.04	8.84498	10.473	noncoding	ENST00000434355	RP11-223F20.1	Ensembl	831	chr13	-	66362063	66362894	NM_194247,ENST00000416838,ENST00000393361,	TCATAGTGGACAACAGCAATCAAATTATGGACCCATGAAAGGGGGCAGTTTTGGTGGAAG	intergenic
ASHG19A3A048408	3.3065	1.7253	3.3065	up	100.841	305.897	6.5433	8.26861	noncoding	AK021569		NRED	1749	chr12	+	14620549	14622296		CAAGGAAAGGAAAATGGACATTATGATGGCTGTCTTTTGTCCTTTTGTAAATGGTGGTTC	intron sense-overlapping	NM_018179	ATF7IP	activating transcription factor 7-interacting	+	14518610	14651697
ASHG19A3A037913	3.90084	1.96378	3.90084	up	67.6081	243.761	5.96505	7.92883	noncoding	ENST00000502685	RP11-576C12.1	Ensembl	260	chr9	-	115344058	115344870		AGACATAGCTTAGGTCTTCAGAGATGTCTATGTTTCCCTGAGCTGCTGAATCATCGAGCA	intronic antisense	NM_133465	KIAA1958	hypothetical protein LOC158405	+	115249247	115422706
ASHG19A3A028174	3.75325	1.90814	3.75325	up	886.707	2978.03	9.66246	11.5706	noncoding	uc001ebn.1	AK023457	UCSC_knowngene	2481	chr1	+	112256829	112259310		CAAGAAGCAAGAGATTGGCTGTTCCTCTTGAGGAAAAACCTTAATAAACCTTCCCATTTT	intergenic
ASHG19A3A050187	2.75015	1.45951	2.75015	up	1919.37	4933.33	10.7835	12.243	noncoding	ENST00000425606	RP11-34F20.4	Ensembl	538	chr13	+	50673466	50674004		TCTCTGTCTCTTTCCTGGATGATCTGGAAGATGAAGCTTCCTGGCCAGGAAAACAAAACA	intergenic
ASHG19A3A047896	3.71821	1.89461	3.71821	up	75.6624	260.461	6.13454	8.02914	noncoding	uc001tdb.1	AK130911	UCSC_knowngene	1587	chr12	-	94101566	94131599		AACAGGCAACATGGACAATTTAAAGGTGTACAACATCCGAGGTTCCATTTCACCCTCAGG	intronic antisense	NM_003805	CRADD	death domain-containing protein CRADD	+	94071150	94244531
ASHG19A3A009213	2.41501	1.27203	2.41501	up	281.399	597.494	8.01091	9.28294	noncoding	ENST00000456184	AC107983.5	Ensembl	254	chr17	+	18430870	18431775	NM_014230,ENST00000416871,	AAGACAAAGCCTTCCAGAAAGAGATAGGCCTCAAGATTCTGGTGTTCAAAGCTTACAGGT	intergenic
ASHG19A3A018093	4.49893	2.16958	4.49893	up	536.614	2115.1	8.93443	11.104	noncoding	ENST00000502069	AL121893.1	Ensembl	1325	chr20	+	18467194	18477848		TAACAAATTCAAATAATCAGGAGGATAAAGTAAAATAAGGGGCCGGGCATGGTGGCTCAT	natural antisense	NM_006606	RBBP9	putative hydrolase RBBP9	-	18467187	18477887
ASHG19A3L0001152	2.87163	1.52187	2.87163	up	294.628	736.458	8.08185	9.60372	noncoding	CD514437	lincRNA-WDFY1	lincRNA	836	chr2	+	224717164	224717876	NM_017925,	TGAAGTTACTGAGTTTGAGGAATGGCAAATTAAATTTGCCTAACCCCCAAAACAAATGAA	intergenic
ASHG19A3A042604	3.12037	1.64172	3.12037	up	171.102	480.507	7.30698	8.9487	noncoding	BC043009		NRED	1261	chr10	-	33176190	33177408		CACCTCATCTTTTGCTCAAATTGAAATGTCATCGAACTGTATTTCTCAAGTCAATGGTCT	intergenic
ASHG19A3A032281	8.7987	3.13729	8.7987	up	144.963	1108.88	7.06827	10.2056	noncoding	ENST00000413175	RP11-21N7.7	Ensembl	1078	chr1	+	155402968	155404046		ATGAAAATCTTCAGGAGACATGCAAAGCAGAAACCCTCTTGCAGGCTCGAAAGAGAAAGC	intronic antisense	NM_018489	ASH1L	probable histone-lysine N-methyltransferase	-	155305051	155532324
ASHG19A3A022456	3.95968	1.98538	3.95968	up	117.959	420.957	6.77	8.75538	noncoding	ENST00000422197	RP11-275F13.3	Ensembl	862	chr1	+	51837950	51838812		CAACTTCATCAACAACAAGATTGCCAATCAGGATGTAGAGAAGAAAGAAGGGCAGGAAAC	intronic antisense	NM_001981	EPS15	epidermal growth factor receptor substrate 15	-	51819934	51984995
ASHG19A3A022456	3.95968	1.98538	3.95968	up	117.959	420.957	6.77	8.75538	noncoding	ENST00000422197	RP11-275F13.3	Ensembl	862	chr1	+	51837950	51838812		CAACTTCATCAACAACAAGATTGCCAATCAGGATGTAGAGAAGAAAGAAGGGCAGGAAAC	intronic antisense	NM_001159969	EPS15	epidermal growth factor receptor substrate 15	-	51819934	51887793
ASHG19A3A044248	2.01175	1.00845	2.01175	up	1225.34	2178.34	10.1287	11.1371	noncoding	NR_028492	CFLP1	RefSeq_NR	2141	chr10	+	89578069	89605365		CACACCAGGCAACATAACAAGACCCCCATCTCTACAAAAAATTAAAAAAGAATTATCAGG	bidirectional	NM_032810	ATAD1	ATPase family AAA domain-containing protein 1	-	89512874	89577917
CUST_201_PI426075208	6.51338	2.70341	6.51338	up	109.435	631.676	6.66429	9.3677	noncoding	nc-HOXD8-20+	nc-HOXD8-20	HOX cluster	328	chr2	-	176992588	176992916	uc002ukl.1,	CGAACGAATTGATTCTGACAATTAAGGATTTGTCCTTCAATCTTGCAAATGCCCAATTAA	intergenic
ASHG19A3A046836	2.06918	1.04906	2.06918	up	1059.33	1912.41	9.92322	10.9723	noncoding	uc001pco.2	BC038205	UCSC_knowngene	437	chr11	+	88157548	88161277		CATCTCCAATACACTCCCTCATGGCTTTATTTTTTCTGCTTATGTGGAAAAATAACAGTA	intergenic
ASHG19A3A034700	3.19152	1.67424	3.19152	up	77.8871	230.975	6.17403	7.84828	noncoding	uc001bkd.1	AX747205	UCSC_knowngene	2415	chr1	-	25629228	25631643		AAGAAATAGCGTGTGGGTAAAGGAAGCAAGGTAGAGAGAGAACACCATCTTGCTGCAAGT	natural antisense	NM_001127691	RHD	blood group Rh(D) polypeptide isoform 2	+	25598980	25656936
ASHG19A3A034700	3.19152	1.67424	3.19152	up	77.8871	230.975	6.17403	7.84828	noncoding	uc001bkd.1	AX747205	UCSC_knowngene	2415	chr1	-	25629228	25631643		AAGAAATAGCGTGTGGGTAAAGGAAGCAAGGTAGAGAGAGAACACCATCTTGCTGCAAGT	natural antisense	NM_016124	RHD	blood group Rh(D) polypeptide isoform 1	+	25598980	25656936
ASHG19A3A029288	2.74412	1.45634	2.74412	up	121.944	308.053	6.82198	8.27832	noncoding	ENST00000468453	CTB-14A14.1	Ensembl	592	chr5	+	180492085	180492677		GGCTCTTCGGCATATGGAGAGCTGATGCAAGCTGCAGAACAGGATGTTGAAAAGAGAAAA	intergenic
ASHG19A3A030730	2.33252	1.22189	2.33252	up	451.491	900.162	8.68119	9.90308	noncoding	ENST00000427423	RP11-134L4.2	Ensembl	339	chr6	-	154926749	154927088		TTGGTTACCTATGCACCTGTTGCCACTTTCAGAAATCTACAGTCAATGTGAATAAGAACT	intergenic
ASHG19A3A033980	4.49188	2.16732	4.49188	up	604.055	2405.58	9.11247	11.2798	noncoding	uc001gch.1	AF268386	UCSC_knowngene	4462	chr1	+	162751900	162756362		GGGGTAAAGGGCAAATGGATTTAATTTCTGCTTAAAACTATCATAGACGTTCCAAATAGA	intergenic
ASHG19A3A015763	3.6117	1.85268	3.6117	up	1259.36	4169.12	10.1677	12.0204	noncoding	ENST00000428093	AC017083.2	Ensembl	483	chr2	+	68352396	68352879		ATGTAGTCTATGGCAAGGTGAAAGAAGGCATGAATATTGTGGAGGCCATGGAGCACTTTG	intergenic
ASHG19A3A021753	3.45989	1.79073	3.45989	up	2264.03	7284.88	11.025	12.8158	noncoding	ENST00000483112	RP11-651P23.6	Ensembl	803	chr3	-	149656783	149657586		AATTATGTGAGGAGTGCTTCCGGATGACTGACCAGGAGGTTATTCAAAATCTCTGGCAGT	intronic antisense	NM_007282	RNF13	E3 ubiquitin-protein ligase RNF13	+	149530474	149679925
ASHG19A3A021753	3.45989	1.79073	3.45989	up	2264.03	7284.88	11.025	12.8158	noncoding	ENST00000483112	RP11-651P23.6	Ensembl	803	chr3	-	149656783	149657586		AATTATGTGAGGAGTGCTTCCGGATGACTGACCAGGAGGTTATTCAAAATCTCTGGCAGT	intronic antisense	NM_183381	RNF13	E3 ubiquitin-protein ligase RNF13	+	149530474	149679925
ASHG19A3A043904	3.39846	1.76488	3.39846	up	131.337	403.945	6.92986	8.69474	noncoding	ENST00000457349	CTD-2173J9.4	Ensembl	240	chr10	+	48138656	48139187		TTGCTTGTTTTCTCTGAACCGCAATAGGATGGTGTTCACAGCGATTCAAAGGGTGGCATT	intergenic
CUST_934_PI426073487	3.03851	1.60336	3.03851	up	400.832	1044.22	8.51713	10.1205	noncoding	uc.455-	uc.455	UCR	245	chr20	-	34328378	34328623		TGAGTGACTTATCGCTGTACCGTGGTCCCCTAGGTAAAATGACTCAACTAAGAATTACCA	intron sense-overlapping	NM_004902	RBM39	RNA-binding protein 39 isoform b	-	34291530	34330193
CUST_934_PI426073487	3.03851	1.60336	3.03851	up	400.832	1044.22	8.51713	10.1205	noncoding	uc.455-	uc.455	UCR	245	chr20	-	34328378	34328623		TGAGTGACTTATCGCTGTACCGTGGTCCCCTAGGTAAAATGACTCAACTAAGAATTACCA	intron sense-overlapping	NM_184234	RBM39	RNA-binding protein 39 isoform a	-	34291530	34330193
ASHG19A3A011637	2.65855	1.41064	2.65855	up	124.554	304.336	6.85046	8.2611	noncoding	ENST00000391892	CTD-2571L23.1	Ensembl	435	chr19	-	48297722	48298159		GCCTTCATTATAGATGTTAAAGCCAAGGAGCACCAGATCAAACAGGCTGTGAAGAAGCTC	intergenic
ASHG19A3A040897	2.05035	1.03587	2.05035	up	174.21	327.449	7.33807	8.37394	noncoding	NR_015378	LOC401588	RefSeq_NR	1848	chrX	+	46404956	46407641		GTGAATTTTCTAATGCTGAGTAAGTTGTGATCCAGAAGTAAATGTATCTGCAAGCTGATT	bidirectional	NM_001190417	ZNF674	zinc finger protein 674 isoform 3	-	46357159	46404892
ASHG19A3A040897	2.05035	1.03587	2.05035	up	174.21	327.449	7.33807	8.37394	noncoding	NR_015378	LOC401588	RefSeq_NR	1848	chrX	+	46404956	46407641		GTGAATTTTCTAATGCTGAGTAAGTTGTGATCCAGAAGTAAATGTATCTGCAAGCTGATT	bidirectional	NM_001039891	ZNF674	zinc finger protein 674 isoform 1	-	46357159	46404892
ASHG19A3A040897	2.05035	1.03587	2.05035	up	174.21	327.449	7.33807	8.37394	noncoding	NR_015378	LOC401588	RefSeq_NR	1848	chrX	+	46404956	46407641		GTGAATTTTCTAATGCTGAGTAAGTTGTGATCCAGAAGTAAATGTATCTGCAAGCTGATT	bidirectional	NM_001146291	ZNF674	zinc finger protein 674 isoform 2	-	46357159	46404892
ASHG19A3A029945	2.06247	1.04437	2.06247	up	579.892	1029.17	9.05083	10.0952	noncoding	AL832122		misc_RNA	5572	chr1	-	23607802	23613245		GGTAGGTAATTTACTTTCTATTGTACTCATAGTTTGTTTGAAACCTCTTCACCTCTATCC	intergenic
ASHG19A3A029343	4.18791	2.06623	4.18791	up	1003.3	3803.66	9.83524	11.9015	noncoding	ENST00000404787	RP1-140K8.2	Ensembl	368	chr6	-	3914158	3914526	NM_001028,ENST00000427600,ENST00000392902,ENST00000327878,	GCTCCTTAGTAAAGGACTTAACAAACTGTTTCAAAGCACAGAGTTCAAGTAATTTACACC	intergenic
ASHG19A3A053236	2.01772	1.01272	2.01772	up	100.223	190.666	6.53291	7.54563	noncoding	ENST00000411845	AC091167.3	Ensembl	1838	chr15	+	90818280	90820834		GTCATGGAAAAGGGCAATTGAAGTTTTCATTATGAAGTTTTCCCAATAAACCAGGAATTC	intergenic
ASHG19A3A045882	2.04314	1.03079	2.04314	up	66.3567	132.015	5.93626	6.96705	noncoding	ENST00000443319	AP003025.2	Ensembl	432	chr11	-	131372652	131410510		GCTGTGTTACACAGCTCTGATGTGCCGGGCTGGTCCTGGGTGCCAAGGATACATCTATCT	intronic antisense	NM_001048209	NTM	neurotrimin isoform 2	+	131240370	132206716
ASHG19A3A021156	3.03197	1.60026	3.03197	up	108.137	300.512	6.64442	8.24467	noncoding	ENST00000459980	RP11-5O17.2	Ensembl	809	chr3	-	53098298	53099107		TTCCAGAAGCCAGCAGATGATATAACATCTCAGCTGGAGATCAATTTTGGAGACCTTGGC	intergenic
ASHG19A3A052015	5.32139	2.4118	5.32139	up	2011.66	10744.2	10.855	13.2668	noncoding	ENST00000471253	RP11-133K1.1	Ensembl	938	chr15	-	40604552	40605490		TACAACCCTGAAGTGCTTGACATCACAGAGGAAACTTCCTTCTTGCTTCCTGAAGGTTGT	intergenic
ASHG19A3A030467	2.76495	1.46725	2.76495	up	2477.07	6321.25	11.1465	12.6138	noncoding	ENST00000406913	RP11-129H15.3	Ensembl	488	chr6	-	122001117	122001605		TATGTTCAACTGGCTCCTGATATCAATGCTTTGGAAGTTGCCAACAAAATTGGGATAATT	intergenic
ASHG19A3A017860	2.30313	1.20359	2.30313	up	2517.95	5378.07	11.1739	12.3775	noncoding	ENST00000485427	C20orf83	Ensembl	219	chr20	-	58035673	58035892		AAGCTCATCTTCCTCTATCGCTCACTGGAGACCATGATCAAGTGGACTCGTGAGGAGTAG	intergenic
ASHG19A3A009981	5.0831	2.34571	5.0831	up	169.233	752.345	7.29099	9.63669	noncoding	ENST00000366365	C17orf86	Ensembl	1028	chr17	+	75084949	75086180		TGTAGTTAGTATCAGAGAGCCCTTGCTTTTCAAAACTTCATAAACAATGTTACTGTCATG	exon sense-overlapping	NM_001204410	SEC14L1	SEC14-like protein 1 isoform a	+	75085234	75213181
ASHG19A3A009981	5.0831	2.34571	5.0831	up	169.233	752.345	7.29099	9.63669	noncoding	ENST00000366365	C17orf86	Ensembl	1028	chr17	+	75084949	75086180		TGTAGTTAGTATCAGAGAGCCCTTGCTTTTCAAAACTTCATAAACAATGTTACTGTCATG	exon sense-overlapping	NM_001204408	SEC14L1	SEC14-like protein 1 isoform b	+	75084724	75213181
ASHG19A3A015647	2.81535	1.49332	2.81535	up	151.203	384.391	7.13237	8.62569	noncoding	ENST00000415103	AC078994.2	Ensembl	741	chr2	+	50105760	50106501		TTCATGAGATCTATACTGTTGGAAAACACTTCAAAGAAAATAACTTCCTGCGGCCATTCA	intergenic
ASHG19A3A010651	10.1277	3.34024	10.1277	up	95.1657	844.813	6.4642	9.80444	noncoding	ENST00000498296	RP11-429H5.1	Ensembl	909	chr18	+	47984256	47985165		CCAAACAAAGTTGAAGCCAAGGAAGAGTCAGAGGAGGATATGGAATTTGGTCTCTTTGAC	intergenic
ASHG19A3A037407	3.56262	1.83294	3.56262	up	338.757	1041.31	8.28116	10.1141	noncoding	ENST00000454768	AC129778.2	Ensembl	519	chr9	-	42845767	42853794	NR_024443,NM_015440,ENST00000432011,ENST00000315293,	TCTCACCAACCTGACAAAAAAGGTGTGCCAAGGGACTTCATCTTACCTATCAGTGATGTC	intergenic
ASHG19A3A045356	2.6308	1.3955	2.6308	up	1281.22	3011.79	10.1897	11.5852	noncoding	ENST00000505544	RP11-399J13.1	Ensembl	468	chr11	-	64942505	64942973	NM_002629,NM_001029891,ENST00000334645,	ATTGTCTATGAATGGGACAAGAACTTGAAGCCTATCAAGCCCATGCAGTTTCTGGGGGAT	intergenic
ASHG19A3L0002748	3.33189	1.73634	3.33189	up	153.685	463.725	7.15556	8.89189	noncoding	DQ916738	lincRNA-ZC3H12C-2	lincRNA	2761	chr11	-	110066286	110167437		GCAGAAATCGATGCAACATTTCTTTCCTGTCTGGGCTGTTTGTATAATTGTATATAAATG	exon sense-overlapping	NM_002906	RDX	radixin	-	110100165	110167437
ASHG19A3A014761	2.80135	1.48612	2.80135	up	752.047	1832.87	9.42004	10.9062	noncoding	ENST00000395181	KRT18P19	Ensembl	705	chr2	-	190175988	190176693		TATAAAGAAGAACCACAAAGAGGAAGTAAAAGGCCTACAAGCCCAGATTGCCAGCTCTGG	intergenic
ASHG19A3A030502	2.50952	1.32741	2.50952	up	1406	3157.64	10.3201	11.6475	noncoding	ENST00000426826	RP11-458I7.1	Ensembl	866	chr1	+	150025845	150027016		AGGGCTACCTCTGATCTGTGTTTGCCCCGACAAATGGAATTTATCCTTACAAATTGGTGT	intergenic
ASHG19A3A017149	2.4319	1.28209	2.4319	up	840.172	1794.13	9.58546	10.8675	noncoding	CR608907		misc_RNA	2096	chr2	+	237038320	237040416		GAAAAAGAAAGATGTGTAAAGTAACAGAGAGAGGTGGCTATGGTGTAGAGACCTCTTTCT	intergenic
ASHG19A3A041768	2.06193	1.04399	2.06193	up	170.123	321.32	7.29712	8.34112	noncoding	ENST00000494825	XX-FW81657B9.5	Ensembl	747	chrX	+	153705371	153706118		AGCACAACAAGAATATTGGGAGGTGCCCCAGCTGCAAATAAACTCAGACTTGGAATAGTA	natural antisense	NM_006014	LAGE3	L antigen family member 3	-	153705240	153707596
ASHG19A3A029601	2.83582	1.50377	2.83582	up	232.88	580.152	7.73406	9.23783	noncoding	ENST00000452408	KRT18P1	Ensembl	1331	chr6	-	28936906	28938237	ENST00000415349,	TTCCTGAAGAAGAACCAAGAAGAGGAAGTAAAAGGCCTACAAGCCCAGATTGCCATCTCT	intergenic
ASHG19A3A024780	2.08793	1.06207	2.08793	up	142.566	274.471	7.04413	8.10621	noncoding	uc003iie.2	BC071807	UCSC_knowngene	197	chr4	-	141281972	141290504		CCACACGAGCTGGAGATTCAGGAAGCATCAGTAGAAGTCAATGGCCATTAATAAAAACAT	intronic antisense	NM_001153585	SCOC	short coiled-coil protein isoform 4	+	141264614	141303710
ASHG19A3A024780	2.08793	1.06207	2.08793	up	142.566	274.471	7.04413	8.10621	noncoding	uc003iie.2	BC071807	UCSC_knowngene	197	chr4	-	141281972	141290504		CCACACGAGCTGGAGATTCAGGAAGCATCAGTAGAAGTCAATGGCCATTAATAAAAACAT	intronic antisense	NM_001153635	SCOC	short coiled-coil protein isoform 5	+	141264596	141303710
ASHG19A3A024780	2.08793	1.06207	2.08793	up	142.566	274.471	7.04413	8.10621	noncoding	uc003iie.2	BC071807	UCSC_knowngene	197	chr4	-	141281972	141290504		CCACACGAGCTGGAGATTCAGGAAGCATCAGTAGAAGTCAATGGCCATTAATAAAAACAT	intronic antisense	NM_001153690	SCOC	short coiled-coil protein isoform 6	+	141264614	141303710
ASHG19A3A024780	2.08793	1.06207	2.08793	up	142.566	274.471	7.04413	8.10621	noncoding	uc003iie.2	BC071807	UCSC_knowngene	197	chr4	-	141281972	141290504		CCACACGAGCTGGAGATTCAGGAAGCATCAGTAGAAGTCAATGGCCATTAATAAAAACAT	intronic antisense	NM_001153446	SCOC	short coiled-coil protein isoform 4	+	141264596	141303710
ASHG19A3A024780	2.08793	1.06207	2.08793	up	142.566	274.471	7.04413	8.10621	noncoding	uc003iie.2	BC071807	UCSC_knowngene	197	chr4	-	141281972	141290504		CCACACGAGCTGGAGATTCAGGAAGCATCAGTAGAAGTCAATGGCCATTAATAAAAACAT	intronic antisense	NM_032547	SCOC	short coiled-coil protein isoform 4	+	141178439	141303710
ASHG19A3A013180	2.06773	1.04805	2.06773	up	564.299	1002.62	9.0135	10.0615	noncoding	NR_026052	MGC2752	RefSeq_NR	3359	chr19	+	59086765	59095763		GTCTAGAATCAGAGTTGGATGAGAAATCAACTTTGAACACCACCTTTGGGGTGGCTGCAT	intergenic
ASHG19A3A027369	6.31511	2.65881	6.31511	up	108.501	606.656	6.65129	9.31009	noncoding	BC013423		misc_RNA	1454	chr5	-	131525840	131527202		ATAAAATTGTCTCATGCAAAAAACCACTGGGTCTAGGGCAATTGCTATCTACTGCCGTCT	intergenic
ASHG19A3A028164	3.48854	1.80262	3.48854	up	183.808	570.947	7.41022	9.21284	noncoding	AK057759		misc_RNA	740	chr5	+	43061496	43062222		GTGCTATAATCTGAATGGAACGTGGGAATAAAACTGTCTTTGCCTTGTACTTCTTGTTAG	intergenic
ASHG19A3A029633	3.27365	1.7109	3.27365	up	6143.97	23997.6	12.4952	14.2061	noncoding	NR_001590	IFITM4P	RefSeq_NR	342	chr6	-	29718584	29718925	ENST00000441380,	ATTCACCTACTCCCTGAAGTCTAGGGACAGGAAGATGGTTGGAGACCTGACTGGGGCCCA	intergenic
ASHG19A3A037397	4.04373	2.01569	4.04373	up	1343.15	4992.23	10.2489	12.2646	noncoding	NR_015363	MGC21881	RefSeq_NR	2581	chr9	-	41952398	41955076		AGAAGACATATGTGGCGTGGTGGAATGGAATGGTGACTAGATTCAAGAAAGAGCTTCCCA	intergenic
ASHG19A3A052048	2.65255	1.40738	2.65255	up	683.379	1597.26	9.28649	10.6939	noncoding	ENST00000417705	RP11-54O7.3	Ensembl	1389	chr1	-	852249	855072		CTTAGGGCAGACCCCGACTTCAGAATTTATACAAATAAATGCAATGAAAAGTGCTGGCAA	intergenic
ASHG19A3A039596	4.52925	2.17927	4.52925	up	944.926	3889.24	9.74974	11.929	noncoding	ENST00000443728	RP11-2N21.2	Ensembl	411	chrX	-	12413875	12414286		ATTTATGGAGCTCACAGTCAGATGAACCATACATGAGCTCTTCCTGCCACATCCAGATGA	intronic antisense	NM_014728	FRMPD4	FERM and PDZ domain-containing protein 4	+	12156584	12742642
ASHG19A3A027317	2.32316	1.21609	2.32316	up	4111.76	9624.48	11.923	13.1391	noncoding	ENST00000464124	RP11-436H11.1	Ensembl	406	chr5	-	124144520	124144926		CAGCATCAGACACACGATACTGAAGAACAAGTATGCCCTGACCTGCGCATGGCTGCCATC	intergenic
ASHG19A3A016939	7.72512	2.94956	7.72512	up	102.024	691.254	6.5606	9.51016	noncoding	ENST00000412427	RP11-380J14.1	Ensembl	4676	chr1	+	17516277	17524112		CAGCGAAATCTACCAACCAAAGAGGATGTCCATACCTGTCTTTTTCTTTCTTCCTTCATT	intergenic
ASHG19A3A048934	2.11084	1.07782	2.11084	up	170.309	328.085	7.29941	8.37723	noncoding	uc001teb.2	CR594785	UCSC_knowngene	2116	chr12	+	95702290	95704406		CTACCCTACCTGAAGACTTGAGATTATAGTCTTTGGGGGGATGGGCAAAGTACTCTCTTT	intergenic
ASHG19A3A012010	2.28715	1.19355	2.28715	up	1203.95	2440	10.1056	11.2991	noncoding	BC061902		RNAdb	520	chr19	+	1989901	1990367		ATGGCCCGTGGCCCAAATCTGGCCCTGTGAGTGTGTTTATAAATAAAGCTTTATCAACAC	natural antisense	NM_017797	BTBD2	BTB/POZ domain-containing protein 2	-	1985446	2015702
ASHG19A3A037064	2.08443	1.05966	2.08443	up	307.36	565.623	8.13993	9.19959	noncoding	BC045653		RNAdb	2448	chr9	-	2715910	2718332		ACAACCCTGCTCAGCAATATTAGGCCATATTTAAAGGGAGCCTGACTTCCACCCAAAAAA	natural antisense	NM_133497	KCNV2	potassium voltage-gated channel subfamily V	+	2717525	2730037
ASHG19A3A020041	3.16464	1.66204	3.16464	up	423.156	1148.76	8.58921	10.2513	noncoding	uc002zlz.1	AX748298	UCSC_knowngene	2665	chr22	+	17593917	17596582		GGCCCAGTGTTCTTGCTTAGACTTAATACTACCCTTCATGTTAAAATAAAACCAAACAAA	exon sense-overlapping	NM_014339	IL17RA	interleukin-17 receptor A precursor	+	17565850	17596584
ASHG19A3A036325	2.36951	1.24459	2.36951	up	12657.8	41680.1	13.591	14.8356	noncoding	ENST00000438775	AC087763.1	Ensembl	303	chr8	+	8819268	8819573		GGGGTCAAGTATACCCCCAATCGTGACCCTCCGGACAAGCGGTGGGCCCTGCACTCATGA	intergenic
ASHG19A3A026645	2.01363	1.0098	2.01363	up	104.945	197.855	6.60059	7.61039	noncoding	ENST00000496412	CTD-2290C23.2	Ensembl	480	chr5	-	31840597	31841077		ATGATCAGAAAAAGAAAGAAGCCTATCAGAAAGGTACCTGGGTTCAACTGAAGTGCCAGC	intronic antisense	NM_178140	PDZD2	PDZ domain-containing protein 2	+	31799030	32111038
ASHG19A3A023110	2.20606	1.14147	2.20606	up	69.6317	148.425	6.00711	7.14858	noncoding	NR_028136	KALRN	RefSeq_NR	2428	chr3	+	123813557	123883532		GGAAGGAACTTGGAACTCAACTTCTTTTGGCCCCTCAACTTGAGATTCACAAAGAAAAAA	exon sense-overlapping	NM_001024660	KALRN	kalirin isoform 1	+	123813557	124440036
ASHG19A3A023110	2.20606	1.14147	2.20606	up	69.6317	148.425	6.00711	7.14858	noncoding	NR_028136	KALRN	RefSeq_NR	2428	chr3	+	123813557	123883532		GGAAGGAACTTGGAACTCAACTTCTTTTGGCCCCTCAACTTGAGATTCACAAAGAAAAAA	exon sense-overlapping	NM_003947	KALRN	kalirin isoform 2	+	123813557	124238698
ASHG19A3A020372	2.74555	1.45709	2.74555	up	334.085	795.733	8.26432	9.72142	noncoding	ENST00000419993	RP11-109P14.10	Ensembl	481	chr1	+	38326368	38327252		TTGCTGGCCCAGAAAATCCCACTTGTTTCACCGAACACTCATTTTTTCAGTGATTTTACA	natural antisense	NM_005540	INPP5B	"type II inositol-1,4,5-trisphosphate"	-	38326368	38412729
ASHG19A3A050967	2.41319	1.27094	2.41319	up	4304.62	10672.8	11.9889	13.2598	noncoding	uc001eky.3	LOC728875	UCSC_knowngene	804	chr1	-	144480747	144520993	uc010pbe.1,NR_024584,NR_024511,NR_024510,	CCCTCTGTGTTCCTTTTGGCAAATGACTTGCTTCCATTGTTTGTTTGTTCAATTGTCTGT	intergenic
ASHG19A3A000294	2.66656	1.41498	2.66656	up	51.8208	135.203	5.58534	7.00032	noncoding	ENST00000446372	SFTA1P	Ensembl	873	chr10	-	10826401	10836877		TTCCCTGTGACCTCCTGCAAATAAGGACAGGGACATACTAGGTAGGAGAAGGCAGTTACC	intergenic
ASHG19A3A009869	2.68851	1.42681	2.68851	up	334.323	781.275	8.26563	9.69244	noncoding	BC037328		misc_RNA	2520	chr17	+	67547498	67549996		GGAGCAAAGTGTTCTTGAAAGAAAATGGTGTGTTGATCTCATAAGAAAATGTACAACCAA	intergenic
ASHG19A3A021460	3.39876	1.76501	3.39876	up	672.881	1982.34	9.26138	11.0264	noncoding	ENST00000495649	RP11-190C22.1	Ensembl	625	chr3	-	119354372	119354997		AAAGAAGTGGGGCATTACCAAGTTCAATGTGAAGACATGGTGGCTGAGAAACGGCTCATT	intergenic
ASHG19A3A014803	2.6005	1.37879	2.6005	up	654.889	1493.56	9.22348	10.6023	noncoding	S81492		RNAdb	319	chr2	-	197629094	197629395	NM_012086,	TATTGTTCTATATAAAGCACCGCAACTGAGAACAGAGCAATGGCAGCTGCTGTGTGAGGA	exon sense-overlapping	NM_012086	GTF3C3	general transcription factor 3C polypeptide 3	-	197627959	197664492
ASHG19A3A020044	2.13382	1.09344	2.13382	up	679.599	1254.25	9.27822	10.3717	noncoding	ENST00000428401	AC005300.5	Ensembl	373	chr22	+	17673825	17674198		AATTAACCGTAACTGGCGGAAACCCAGAGGTATTCACAACGGGGTTCATAGAAGGTTCAA	intronic antisense	NM_017424	CECR1	adenosine deaminase CECR1 isoform a precursor	-	17660193	17690779
ASHG19A3A020044	2.13382	1.09344	2.13382	up	679.599	1254.25	9.27822	10.3717	noncoding	ENST00000428401	AC005300.5	Ensembl	373	chr22	+	17673825	17674198		AATTAACCGTAACTGGCGGAAACCCAGAGGTATTCACAACGGGGTTCATAGAAGGTTCAA	intronic antisense	NM_177405	CECR1	adenosine deaminase CECR1 isoform b	-	17660191	17680545
ASHG19A3A044059	2.86808	1.52008	2.86808	up	3566.85	10323.2	11.7042	13.2243	noncoding	ENST00000438138	RP11-242G20.2	Ensembl	877	chr10	+	71538717	71539594		AATAAAGATCAGGTAGCTCAAAAGAAGGCAAGCTTTTTCAGAGCTCAAGAGCGGGCTGCT	intergenic
ASHG19A3A033717	2.08672	1.06124	2.08672	up	15503	48449.8	13.946	15.0072	noncoding	ENST00000461005	RP4-800G7.1	Ensembl	181	chr7	-	148888134	148888315	NM_021029,ENST00000476382,ENST00000443749,	ACGGACTTTCTGTAAGAAGTGTGGCAAGCACCAACCCCATAAAGTGACACAGTACAAGAA	intergenic
ASHG19A3A014941	3.541	1.82416	3.541	up	214.823	663.117	7.62606	9.45022	noncoding	ENST00000429485	AC016697.2	Ensembl	615	chr2	-	209134066	209134681		AAGTTTAACAAGGATCAGCTGGAGGAGTTCAAGGTGGCCTTCAAGCTGTTTAACTGAGTG	intronic antisense	NM_152671	PIKFYVE	1-phosphatidylinositol-3-phosphate 5-kinase	+	209130990	209170271
ASHG19A3A014941	3.541	1.82416	3.541	up	214.823	663.117	7.62606	9.45022	noncoding	ENST00000429485	AC016697.2	Ensembl	615	chr2	-	209134066	209134681		AAGTTTAACAAGGATCAGCTGGAGGAGTTCAAGGTGGCCTTCAAGCTGTTTAACTGAGTG	intronic antisense	NM_015040	PIKFYVE	1-phosphatidylinositol-3-phosphate 5-kinase	+	209130990	209223475
ASHG19A3A014941	3.541	1.82416	3.541	up	214.823	663.117	7.62606	9.45022	noncoding	ENST00000429485	AC016697.2	Ensembl	615	chr2	-	209134066	209134681		AAGTTTAACAAGGATCAGCTGGAGGAGTTCAAGGTGGCCTTCAAGCTGTTTAACTGAGTG	intronic antisense	NM_001178000	PIKFYVE	1-phosphatidylinositol-3-phosphate 5-kinase	+	209130990	209170271
ASHG19A3A032356	2.28672	1.19328	2.28672	up	4131.45	9482.23	11.9336	13.1269	noncoding	ENST00000405880	RP11-302L19.2	Ensembl	490	chr6	+	170514992	170515482		ATATCACTTGCGATGAGATTGTCAACATTGCCAGACAGATGCAGCACCGATCTTTAGCCA	intergenic
ASHG19A3A051935	2.86886	1.52048	2.86886	up	740.362	1846.39	9.39698	10.9175	noncoding	ENST00000433407	RP11-312B8.2	Ensembl	286	chr1	-	6894392	6894678		AATTGTACACCACAGATTCAGGCATGGACTCCGTGAGGAAACAACACCTAAACCAAAGAG	intronic antisense	NM_001195563	CAMTA1	calmodulin-binding transcription activator 1	+	6845383	6932107
ASHG19A3A051935	2.86886	1.52048	2.86886	up	740.362	1846.39	9.39698	10.9175	noncoding	ENST00000433407	RP11-312B8.2	Ensembl	286	chr1	-	6894392	6894678		AATTGTACACCACAGATTCAGGCATGGACTCCGTGAGGAAACAACACCTAAACCAAAGAG	intronic antisense	NM_015215	CAMTA1	calmodulin-binding transcription activator 1	+	6845383	7829766
ASHG19A3A030767	3.39159	1.76196	3.39159	up	1283.5	3964.97	10.1921	11.9541	noncoding	BC041951		NRED	2155	chr6	-	160100150	160102293		GAGGAAGCATTCTTTCCTTCACTAAGTTTGTCTTTCTTGTCTTCTGGATAGATTGATTTT	exon sense-overlapping	NM_001024466	SOD2	"superoxide dismutase [Mn], mitochondrial isoform"	-	160100148	160114353
ASHG19A3A030767	3.39159	1.76196	3.39159	up	1283.5	3964.97	10.1921	11.9541	noncoding	BC041951		NRED	2155	chr6	-	160100150	160102293		GAGGAAGCATTCTTTCCTTCACTAAGTTTGTCTTTCTTGTCTTCTGGATAGATTGATTTT	exon sense-overlapping	NM_001024465	SOD2	"superoxide dismutase [Mn], mitochondrial isoform"	-	160100148	160114353
ASHG19A3A053030	2.38363	1.25316	2.38363	up	199.56	428.875	7.52721	8.78037	noncoding	G36947		misc_RNA	411	chr15	+	70959371	70959782		GCACTGCAAGTATCTCAGAAGTCTGTTTGGCATTTTCTTCTACTAGCTTCTCTTTCACAT	natural antisense	NM_001008224	UACA	uveal autoantigen with coiled-coil domains and	-	70946892	70994620
ASHG19A3A053030	2.38363	1.25316	2.38363	up	199.56	428.875	7.52721	8.78037	noncoding	G36947		misc_RNA	411	chr15	+	70959371	70959782		GCACTGCAAGTATCTCAGAAGTCTGTTTGGCATTTTCTTCTACTAGCTTCTCTTTCACAT	natural antisense	NM_018003	UACA	uveal autoantigen with coiled-coil domains and	-	70946892	71055850
ASHG19A3A041302	2.97826	1.57447	2.97826	up	403.491	1033.99	8.52657	10.101	noncoding	ENST00000331267	RP1-164F3.6	Ensembl	462	chrX	+	100594904	100595922		TGACGAACACAAAGGGTAAGAGGCGAGGCACCAGATAGATGTTCTCTAGGCCTTTCAGAA	intergenic
ASHG19A3A024393	3.02464	1.59677	3.02464	up	307.761	808.333	8.14203	9.7388	noncoding	CR612147		NRED	963	chr4	-	80825378	80826340	NM_058172,	GGTTTAAACCCCCATGTATTTCAGATTGTTAGAGAAAGAAGTAGTTTGCTTATATTTCCC	exon sense-overlapping	NM_058172	ANTXR2	anthrax toxin receptor 2 isoform 1	-	80822770	80994477
ASHG19A3A014554	2.5703	1.36194	2.5703	up	392.112	867.482	8.48332	9.84526	noncoding	ENST00000420969	AC009487.6	Ensembl	6821	chr2	-	162357395	162364216	NM_015446,	GTTGACGGAGTCAAGAGCAAACCAAGAAAAACTACAGAAGTGACAGGAACAGGTCTTGGA	intergenic
ASHG19A3A014204	8.37961	3.06688	8.37961	up	2323.43	22576.5	11.0643	14.1311	noncoding	NR_024373	LOC541471	RefSeq_NR	557	chr2	-	112186889	112252692	NR_024206,NR_024205,NR_024204,	TGGCCAGTCTCTGTGTGTCTTAATCCCTTGTCCTTCATTAAAAGCAAAACTAAAGAAAAC	intergenic
ASHG19A3A052399	2.17704	1.12237	2.17704	up	452.757	846.317	8.68611	9.80848	noncoding	HIT000295730		H-invDB	1297	chr15	-	75613738	75615034		CTACCAGTTACACTGGGACTGTAACAGCATTTTTACTTTCTGTACAACAAAAATCTTTGT	intergenic
ASHG19A3A052201	3.05141	1.60948	3.05141	up	60.1559	174.385	5.79597	7.40544	noncoding	AK022385		misc_RNA	1714	chr15	-	59396835	59398549		TAGGACGCCTCTGAATTTTGACAAGGCCTCATCTACGAATTTCTCTCGACGTTTGTAGTG	natural antisense	NM_004701	CCNB2	G2/mitotic-specific cyclin-B2	+	59397283	59417244
ASHG19A3A029727	4.07271	2.02599	4.07271	up	639.524	2300.47	9.19113	11.2171	noncoding	NR_001284	TNXA	RefSeq_NR	2783	chr6	-	31976196	31980800	NM_032470,NM_019105,	TTTACAGGGGGGAGGGGAGGGGTTCGTACGGGAGCAATAAAGGAGAAACTGAGGTACCCG	natural antisense	NM_000500	CYP21A2	steroid 21-hydroxylase isoform a	+	31973358	31976712
ASHG19A3A029727	4.07271	2.02599	4.07271	up	639.524	2300.47	9.19113	11.2171	noncoding	NR_001284	TNXA	RefSeq_NR	2783	chr6	-	31976196	31980800	NM_032470,NM_019105,	TTTACAGGGGGGAGGGGAGGGGTTCGTACGGGAGCAATAAAGGAGAAACTGAGGTACCCG	bidirectional	NM_032454	STK19	serine/threonine-protein kinase 19 isoform 2	+	31981517	31981961
ASHG19A3A029727	4.07271	2.02599	4.07271	up	639.524	2300.47	9.19113	11.2171	noncoding	NR_001284	TNXA	RefSeq_NR	2783	chr6	-	31976196	31980800	NM_032470,NM_019105,	TTTACAGGGGGGAGGGGAGGGGTTCGTACGGGAGCAATAAAGGAGAAACTGAGGTACCCG	bidirectional	NM_004197	STK19	serine/threonine-protein kinase 19 isoform 1	+	31981517	31981961
ASHG19A3A029727	4.07271	2.02599	4.07271	up	639.524	2300.47	9.19113	11.2171	noncoding	NR_001284	TNXA	RefSeq_NR	2783	chr6	-	31976196	31980800	NM_032470,NM_019105,	TTTACAGGGGGGAGGGGAGGGGTTCGTACGGGAGCAATAAAGGAGAAACTGAGGTACCCG	natural antisense	NM_001128590	CYP21A2	steroid 21-hydroxylase isoform b	+	31973358	31976712
ASHG19A3A029727	4.07271	2.02599	4.07271	up	639.524	2300.47	9.19113	11.2171	noncoding	NR_001284	TNXA	RefSeq_NR	2783	chr6	-	31976196	31980800	NM_032470,NM_019105,	TTTACAGGGGGGAGGGGAGGGGTTCGTACGGGAGCAATAAAGGAGAAACTGAGGTACCCG	exon sense-overlapping	NM_032470	TNXB	tenascin-X isoform 2	-	31976196	31981050
ASHG19A3A054156	2.48047	1.31062	2.48047	up	77.7929	183.575	6.17199	7.48261	noncoding	ENST00000402520	RPS20P2	Ensembl	389	chr16	+	1379078	1379778		AGTGAAAGGACCGGTTTGAATCCTACCAACACTTTGAGAATCACTACAAGAAAAACTCCA	intergenic
ASHG19A3A014668	2.19184	1.13214	2.19184	up	961.408	1830.9	9.77238	10.9045	noncoding	uc002ukq.2	BC034000	UCSC_knowngene	690	chr2	-	176999570	177001826		GACACAAGAAGCTTGGATGTGAAATAGCACTTCCTTCTGTGTTACAGAATAAAACAATAT	intergenic
ASHG19A3A026068	2.09744	1.06863	2.09744	up	163.725	315.627	7.24594	8.31457	noncoding	ENST00000503502	RP11-308D13.1	Ensembl	385	chr4	+	140467504	140467889		AATTGGGTGACCATGTAACCAACTTATGCAAGATGGGGGCCCCCAAATCTGGTATCTTTT	intronic antisense	NM_030648	SETD7	histone-lysine N-methyltransferase SETD7	-	140427191	140477577
ASHG19A3A023571	2.02171	1.01558	2.02171	up	570.682	992.366	9.02964	10.0452	noncoding	AK021510		misc_RNA	1712	chr3	+	178953577	178955289		GATTTTCCCTTCTATTCTGCTTTATATTAAAAGCCCATTAGAAAATGGGAACCTGGTGAA	intergenic
ASHG19A3A038612	4.3659	2.12628	4.3659	up	198.805	757.43	7.52149	9.64777	noncoding	ENST00000417418	RP11-216M21.6	Ensembl	308	chr9	+	42312409	42316345	NM_015234,NM_001098518,ENST00000450911,ENST00000423199,	CACACCTGTGTTTTCTATGAGTTCTCCAATATCAAGGAGATTTAACAGTTTGTTTGGTAA	intergenic
ASHG19A3A018677	2.68176	1.42318	2.68176	up	1058.83	2525.82	9.92272	11.3459	noncoding	ENST00000400115	PPIAP	Ensembl	501	chr21	-	22200444	22200952		TTTGATGATGAGAACTTCGTCCTAAATTATACAGGTCCTGGCATCTTGTCCGTGGAGAAT	intergenic
ASHG19A3A008736	2.91705	1.54451	2.91705	up	157.589	415.022	7.18832	8.73283	noncoding	HIT000016017		H-invDB	2728	chr17	-	66129341	66132068	NR_033420,NM_003025,BC073825,	CAGGGCAAACTGAAATGTATGCCTGAATTTTGTAAACAGAAGTATTAAAGGTCTTTCTAC	intergenic
ASHG19A3A046846	2.07064	1.05008	2.07064	up	293.385	539.305	8.07582	9.1259	noncoding	AK129743		misc_RNA	1590	chr1	-	65487997	65489585		ATGGGTTAGAAAGAGCCCTTAATTGCTTCACTAGCATGGACTTCTCTGTGACCAAGAAAA	intergenic
ASHG19A3A051552	3.50312	1.80864	3.50312	up	912.498	2840.19	9.70365	11.5123	noncoding	ENST00000493832	CTD-2325P2.2	Ensembl	494	chr14	+	69159806	69160300		TCTTTAGCCAGAGAACTCTCTGGAATCATTAAAGAGATCGTGAGGACTGCCTAGTCTGTG	intergenic
ASHG19A3A045091	2.01124	1.00808	2.01124	up	53.9308	107.311	5.63686	6.64494	noncoding	uc001mxv.1	AX748080	UCSC_knowngene	2045	chr11	-	43965336	43968756		TCAGGAGCCTCACAGACATATCCAGGTAAAAAGATCGTTAAATAAATGCCTTCAGCCATC	natural antisense	NM_001145033	C11orf96	protein Ag2 homolog	+	43964105	43965433
ASHG19A3A035047	2.85228	1.51211	2.85228	up	8138.24	29091.2	12.9235	14.4356	noncoding	ENST00000491343	RP11-128A6.1	Ensembl	752	chr7	+	128696072	128696824	NR_002187,	CTCATGAGTGGTGTTTCCCTCAAGCCCGAATTCGTAGACATCATCAATGCCAAACAATGA	bidirectional	NM_012470	TNPO3	transportin-3 isoform 1	-	128594233	128695227
ASHG19A3A035047	2.85228	1.51211	2.85228	up	8138.24	29091.2	12.9235	14.4356	noncoding	ENST00000491343	RP11-128A6.1	Ensembl	752	chr7	+	128696072	128696824	NR_002187,	CTCATGAGTGGTGTTTCCCTCAAGCCCGAATTCGTAGACATCATCAATGCCAAACAATGA	bidirectional	NM_001191028	TNPO3	transportin-3 isoform 2	-	128594233	128695227
ASHG19A3A034311	3.8931	1.96092	3.8931	up	235.848	791.029	7.75103	9.71195	noncoding	ENST00000447259	RP11-54B9.2	Ensembl	1306	chr1	+	166716593	166717899		TGTTAAGAAGCAGAAGAAGCTTCTGGTAGAAAAAAGGGGCAGCAGCTACCAAGAAACCAG	intergenic
ASHG19A3L0002586	14.13	3.82069	14.13	up	189.596	2401.4	7.45667	11.2774	noncoding	AK304777	lincRNA-FBLN2-2	lincRNA	3873	chr3	+	13573823	13679512	NM_001998,NM_001165035,NM_001004019,	AGCCCAGGGCTCACACTGCGTGGGAGGGACTGGGTCACTATTGTGGTTTTTACTATAACT	exon sense-overlapping	NM_001165035	FBLN2	fibulin-2 isoform a precursor	+	13610239	13679922
ASHG19A3L0002586	14.13	3.82069	14.13	up	189.596	2401.4	7.45667	11.2774	noncoding	AK304777	lincRNA-FBLN2-2	lincRNA	3873	chr3	+	13573823	13679512	NM_001998,NM_001165035,NM_001004019,	AGCCCAGGGCTCACACTGCGTGGGAGGGACTGGGTCACTATTGTGGTTTTTACTATAACT	exon sense-overlapping	NM_001004019	FBLN2	fibulin-2 isoform a precursor	+	13590624	13679922
ASHG19A3L0002586	14.13	3.82069	14.13	up	189.596	2401.4	7.45667	11.2774	noncoding	AK304777	lincRNA-FBLN2-2	lincRNA	3873	chr3	+	13573823	13679512	NM_001998,NM_001165035,NM_001004019,	AGCCCAGGGCTCACACTGCGTGGGAGGGACTGGGTCACTATTGTGGTTTTTACTATAACT	exon sense-overlapping	NM_001998	FBLN2	fibulin-2 isoform b precursor	+	13590624	13679922
ASHG19A3A013804	2.16761	1.11611	2.16761	up	89.5583	184.805	6.3772	7.49331	noncoding	ENST00000413436	AC136007.2	Ensembl	602	chr2	-	70190594	70314944		AGATGGTTTCCGTAGATGGTGGCTTTCTTTGGACCCTTGACATCAACCAGTTACTATTTG	natural antisense	NM_006196	PCBP1	poly(rC)-binding protein 1	+	70314584	70316334
ASHG19A3A012328	3.56278	1.833	3.56278	up	1273.9	4159.28	10.1838	12.0168	noncoding	ENST00000444423	RP11-543E8.2	Ensembl	407	chr1	-	230747751	230748158		AAACATAGACTTGCAAGACATGGCCTGCCTCCATGAGAAGAAAAAGACCTCAAGAAAGCA	intergenic
ASHG19A3A026958	3.0182	1.59369	3.0182	up	720.335	1880.81	9.35631	10.95	noncoding	ENST00000440059	AMYP1	Ensembl	1023	chr1	+	104256344	104262493	NM_020978,NM_001008221,NM_001008219,NM_001008218,NM_000699,	TTAATCCAGACACTACTTGTGGCAATGACTGCGTCTGTGAACATCGATGGCGCCAAATAA	intergenic
ASHG19A3A037821	2.83482	1.50326	2.83482	up	254.326	630.301	7.86137	9.36462	noncoding	AJ420439		NRED	960	chr9	-	104235441	104236372	uc004bbl.1,	GTATTGCATAGACATGTCTGTGAAAATAAAAGCACCCATTTTGCTAAGGCTTTCTGAGAA	intergenic
ASHG19A3A050417	2.65959	1.41121	2.65959	up	133.572	325.3	6.95312	8.36433	noncoding	ENST00000413224	RP11-122A8.3	Ensembl	722	chr13	+	99825846	99826744		AGTGTATTCTGATGCTCTGGGTGAAAAGAACAGAAGGGTTATGTGGTCCAAGACAGTGAG	intergenic
ASHG19A3A035557	2.97017	1.57055	2.97017	up	172.929	465.386	7.32631	8.89686	noncoding	AK091357		RNAdb	2311	chr8	-	17082475	17084786		GTGAGCAGGTGTCTTGTATCACTGCGAAACCCATGCATAATAAAAACTTGTTCTTGAGCT	intergenic
ASHG19A3A007690	2.27179	1.18383	2.27179	up	404.124	791.229	8.52849	9.71232	noncoding	NR_029415	SHMT2	RefSeq_NR	2097	chr12	+	57624110	57628717		ATCTTCTTCGAGTCTATGCCCTATAAGCTCAACGGCTTTAGCTGTTTGTGTGTCTGTCCA	natural antisense	NM_020142	NDUFA4L2	NADH dehydrogenase [ubiquinone] 1 alpha	-	57628685	57634475
ASHG19A3A007690	2.27179	1.18383	2.27179	up	404.124	791.229	8.52849	9.71232	noncoding	NR_029415	SHMT2	RefSeq_NR	2097	chr12	+	57624110	57628717		ATCTTCTTCGAGTCTATGCCCTATAAGCTCAACGGCTTTAGCTGTTTGTGTGTCTGTCCA	exon sense-overlapping	NM_005412	SHMT2	"serine hydroxymethyltransferase, mitochondrial"	+	57623355	57628718
ASHG19A3A007690	2.27179	1.18383	2.27179	up	404.124	791.229	8.52849	9.71232	noncoding	NR_029415	SHMT2	RefSeq_NR	2097	chr12	+	57624110	57628717		ATCTTCTTCGAGTCTATGCCCTATAAGCTCAACGGCTTTAGCTGTTTGTGTGTCTGTCCA	exon sense-overlapping	NM_001166359	SHMT2	"serine hydroxymethyltransferase, mitochondrial"	+	57624110	57628718
ASHG19A3A007690	2.27179	1.18383	2.27179	up	404.124	791.229	8.52849	9.71232	noncoding	NR_029415	SHMT2	RefSeq_NR	2097	chr12	+	57624110	57628717		ATCTTCTTCGAGTCTATGCCCTATAAGCTCAACGGCTTTAGCTGTTTGTGTGTCTGTCCA	exon sense-overlapping	NM_001166357	SHMT2	"serine hydroxymethyltransferase, mitochondrial"	+	57624142	57628718
ASHG19A3A007690	2.27179	1.18383	2.27179	up	404.124	791.229	8.52849	9.71232	noncoding	NR_029415	SHMT2	RefSeq_NR	2097	chr12	+	57624110	57628717		ATCTTCTTCGAGTCTATGCCCTATAAGCTCAACGGCTTTAGCTGTTTGTGTGTCTGTCCA	exon sense-overlapping	NM_001166358	SHMT2	"serine hydroxymethyltransferase, mitochondrial"	+	57623827	57628718
ASHG19A3A007690	2.27179	1.18383	2.27179	up	404.124	791.229	8.52849	9.71232	noncoding	NR_029415	SHMT2	RefSeq_NR	2097	chr12	+	57624110	57628717		ATCTTCTTCGAGTCTATGCCCTATAAGCTCAACGGCTTTAGCTGTTTGTGTGTCTGTCCA	exon sense-overlapping	NM_001166356	SHMT2	"serine hydroxymethyltransferase, mitochondrial"	+	57623355	57628718
ASHG19A3A024864	3.2334	1.69305	3.2334	up	3308.46	10963	11.5872	13.2802	noncoding	ENST00000496058	RP11-555K12.2	Ensembl	459	chr4	-	153535026	153535485		TTGTCTCCTTCAATGACACCTTTGTCCATGTCACTGATGTTTCTGGCAAGGGAACTACCT	intergenic
ASHG19A3A013737	2.79257	1.48159	2.79257	up	153.438	386.396	7.15342	8.63502	noncoding	ENST00000479658	AC114752.2	Ensembl	549	chr2	-	64574326	64574875		TCTTGTGTTCATTGTGGATGTTAAAGCCACCACCAAGAACCAGATCAAACAGGCTGGGAA	intergenic
ASHG19A3A049662	4.67573	2.22519	4.67573	up	880.875	3741.28	9.65421	11.8794	noncoding	ENST00000420287	RP11-505F3.4	Ensembl	408	chr13	-	73674715	73675123	NM_001444,ENST00000458175,ENST00000457747,ENST00000439042,	TTAGTGGTGGAGTGTGTCATGAACCATGTCGCCTGTACTCGGATCTATGAAAAAGTAGAA	intergenic
ASHG19A3A016607	2.48847	1.31526	2.48847	up	7545.14	22456.8	12.8017	14.117	noncoding	ENST00000433054	RP11-1O7.1	Ensembl	884	chr2	+	174162356	174163240	ENST00000478174,	AAGGAGACTGTATTAACCAAGTCTCCCTATCAGGAATTCACTGACCACTCCATCAAGACC	intergenic
ASHG19A3A023614	2.37594	1.2485	2.37594	up	94.8476	210.862	6.45987	7.70836	noncoding	ENST00000491676	RP11-509E17.1	Ensembl	503	chr3	+	183266522	183270114		AAGAGAAGTTGCAATAACCGCTAAGACTGCAGATGCATTTGACTCAGCAAACCCCCTTCA	intronic antisense	NM_130446	KLHL6	kelch-like protein 6	-	183205318	183273499
ASHG19A3A054506	2.74089	1.45465	2.74089	up	1618.19	4074.96	10.5337	11.9884	noncoding	uc002ean.1	BC039500	UCSC_knowngene	1131	chr16	+	31053031	31054276	ENST00000503629,	GTTGGCTGCCTTCATCCACTCTCTCACTTCTCTGCCTTCAGAGTAAAATTGCAAGATCTG	intergenic
ASHG19A3A037102	2.29315	1.19733	2.29315	up	117.472	249.135	6.76432	7.96165	noncoding	ENST00000442955	RNF2P1	Ensembl	1005	chr9	-	6669003	6670008	NM_007212,	CAACAGCCAGTGGCCAGTTCACTGTATTAAATTGCTCTTTTTCTTTGGAATTGGTCAGTG	intergenic
ASHG19A3A036086	3.5698	1.83584	3.5698	up	759.254	2394.74	9.43649	11.2723	noncoding	AK056155		misc_RNA	2500	chr1	+	181028570	181031073		TGAGGACTGGTCTGAATTCTTCAAAGGTTTCAGCTGTATTAACATTCTCCATCTAATAAA	exon sense-overlapping	NM_001195035	MR1	major histocompatibility complex class I-related	+	181002560	181031074
ASHG19A3A036086	3.5698	1.83584	3.5698	up	759.254	2394.74	9.43649	11.2723	noncoding	AK056155		misc_RNA	2500	chr1	+	181028570	181031073		TGAGGACTGGTCTGAATTCTTCAAAGGTTTCAGCTGTATTAACATTCTCCATCTAATAAA	exon sense-overlapping	NM_001531	MR1	major histocompatibility complex class I-related	+	181002560	181031074
ASHG19A3A036086	3.5698	1.83584	3.5698	up	759.254	2394.74	9.43649	11.2723	noncoding	AK056155		misc_RNA	2500	chr1	+	181028570	181031073		TGAGGACTGGTCTGAATTCTTCAAAGGTTTCAGCTGTATTAACATTCTCCATCTAATAAA	exon sense-overlapping	NM_001195000	MR1	major histocompatibility complex class I-related	+	181002560	181031074
ASHG19A3A036086	3.5698	1.83584	3.5698	up	759.254	2394.74	9.43649	11.2723	noncoding	AK056155		misc_RNA	2500	chr1	+	181028570	181031073		TGAGGACTGGTCTGAATTCTTCAAAGGTTTCAGCTGTATTAACATTCTCCATCTAATAAA	exon sense-overlapping	NM_001194999	MR1	major histocompatibility complex class I-related	+	181002560	181031074
ASHG19A3A007578	4.41954	2.1439	4.41954	up	52.7985	217.188	5.60952	7.75342	noncoding	NR_027763	GYS1	RefSeq_NR	3453	chr19	-	49471382	49496610		TCGAAGTGGCCTGGGAGGTGGCTAACAAGGGTGTATTTCGGGCGCTGGCTGATCGAGGGA	bidirectional	NM_006666	RUVBL2	ruvB-like 2	+	49497155	49519182
ASHG19A3A007578	4.41954	2.1439	4.41954	up	52.7985	217.188	5.60952	7.75342	noncoding	NR_027763	GYS1	RefSeq_NR	3453	chr19	-	49471382	49496610		TCGAAGTGGCCTGGGAGGTGGCTAACAAGGGTGTATTTCGGGCGCTGGCTGATCGAGGGA	exon sense-overlapping	NM_001161587	GYS1	"glycogen [starch] synthase, muscle isoform 2"	-	49471381	49496610
ASHG19A3A007578	4.41954	2.1439	4.41954	up	52.7985	217.188	5.60952	7.75342	noncoding	NR_027763	GYS1	RefSeq_NR	3453	chr19	-	49471382	49496610		TCGAAGTGGCCTGGGAGGTGGCTAACAAGGGTGTATTTCGGGCGCTGGCTGATCGAGGGA	exon sense-overlapping	NM_002103	GYS1	"glycogen [starch] synthase, muscle isoform 1"	-	49471381	49496610
ASHG19A3A049494	2.26306	1.17827	2.26306	up	186.739	380.873	7.43029	8.60856	noncoding	ENST00000412208	RP11-396A22.2	Ensembl	1084	chr13	-	42013951	42015035	ENST00000442229,ENST00000422682,	AACAGTCGAATCTCATGATCTGTTCCATCCTTTTTCTTGTGTGGGTGAGAAAGGGCAACC	intergenic
ASHG19A3A022817	2.74787	1.45831	2.74787	up	2850.37	7337.59	11.3651	12.8234	noncoding	ENST00000494640	RP11-345M4.1	Ensembl	934	chr3	+	74185109	74186043	NM_001628,	TCTTTGACTTTGAACTAAGCAGCCAGGATATGACCACCTTACTCAGCTACAACAGGAACT	intergenic
ASHG19A3A022313	2.97124	1.57106	2.97124	up	2607.07	7190.39	11.2281	12.7992	noncoding	ENST00000454716	AC090954.4	Ensembl	778	chr3	+	15182886	15183664	ENST00000483874,ENST00000480160,ENST00000479743,ENST00000470389,	GAGACACATGCGAAAGTTGAATGAGCTGATGGATATGAACCACTAGTCCAAGAATCTGTT	intergenic
ASHG19A3A022130	2.6354	1.39802	2.6354	up	316.286	726.48	8.1863	9.58432	noncoding	uc003fus.1	CR597873	UCSC_knowngene	1672	chr3	-	195382447	195384798		CTAGCTTACCCTGATTCTGCTTCTGGTTCAGATAGTATTTTAATATTTCTAGTGTGTCTT	intergenic
ASHG19A3A008661	4.54155	2.18318	4.54155	up	81.7729	338.826	6.24541	8.4286	noncoding	AL157428		NRED	3574	chr17	-	58536870	58542522		AAACAGCCTATAGGAGGCTGGGAGTTAGAACTGAAACCCTCACATGAAGCAAAGTCAAGA	exon sense-overlapping	NM_006380	APPBP2	amyloid protein-binding protein 2	-	58520519	58603580
ASHG19A3A031768	3.90649	1.96587	3.90649	up	286.594	960.542	8.03834	10.0042	noncoding	ENST00000402075	RP5-991C6.2	Ensembl	293	chr6	+	82473927	82474220		TCTGAAGACATGGTAGTTGAGAAGTGTCTTATCTCAGATGGCTGTGGGGTCAAATGCATC	intergenic
ASHG19A3A040183	2.4829	1.31202	2.4829	up	139.05	317.113	7.0082	8.32023	noncoding	ENST00000416788	RP11-410C4.1	Ensembl	398	chr1	+	220621857	220622255		CTGAAGAACTTGCTACCAAACTGGGTAAAATATACACTGTTGAGTTTTCTGCACATAAAA	intergenic
ASHG19A3A020284	3.07691	1.62148	3.07691	up	747.603	1994.72	9.41108	11.0326	noncoding	NR_026963	LOC284900	RefSeq_NR	5125	chr22	+	28315363	28398665		AACCCAAAGTGACACATGCCTGGCGGGATGTTCAGTCTCTGTAAACCCATATGGTTTTTT	bidirectional	NM_012399	PITPNB	phosphatidylinositol transfer protein beta	-	28247656	28315255
ASHG19A3A020284	3.07691	1.62148	3.07691	up	747.603	1994.72	9.41108	11.0326	noncoding	NR_026963	LOC284900	RefSeq_NR	5125	chr22	+	28315363	28398665		AACCCAAAGTGACACATGCCTGGCGGGATGTTCAGTCTCTGTAAACCCATATGGTTTTTT	natural antisense	NM_001145418	TTC28	tetratricopeptide repeat protein 28	-	28374001	29075853
ASHG19A3A012141	2.34111	1.22719	2.34111	up	3026.68	6648.59	11.4539	12.681	noncoding	ENST00000491732	CTD-2102F19.1	Ensembl	478	chr19	+	7815569	7816047		AATAATCAGAAACAGAAAGAAGCCAAAGAGAAAGGTACCTGGGTTCAACTGAAGCACCAG	intergenic
ASHG19A3A019944	2.2539	1.17242	2.2539	up	404.56	786.035	8.52993	9.70235	noncoding	HIT000293167		H-invDB	658	chr22	-	47157803	47158460		GCTTGAAGGGAAGAATGGTTTGAGCACCGAGGACAAGAATTAATTCCCCAGGCCTGGGTT	bidirectional	NM_014346	TBC1D22A	TBC1 domain family member 22A	+	47158517	47571342
ASHG19A3A039567	2.8792	1.52567	2.8792	up	2322.47	6228.23	11.0637	12.5893	noncoding	ENST00000431673	RP11-318L16.5	Ensembl	531	chr1	+	211615615	211616148	NM_005719,ENST00000437218,	ATCAACCCAGCACGTGGTGGACTTGCTTTGTGAAGAGACAGTTCATGAACAAGAGTCTTT	intergenic
ASHG19A3A037469	3.17714	1.66773	3.17714	up	165.01	473.684	7.25763	8.92536	noncoding	ENST00000514120	RP11-96J15.2	Ensembl	227	chr9	-	46786248	46787634	NR_003674,NR_003670,NM_002009,ENST00000454645,ENST00000377614,ENST00000377549,ENST00000332473,	CAATGGAGGGGAAATGTTTGTTGCCTTAAATCAAAAGGGGATTCCTGTAAGAGGAAAAAA	intergenic
ASHG19A3A017584	2.16644	1.11533	2.16644	up	324.513	618.8	8.22314	9.33847	noncoding	ENST00000456658	CDC42P1	Ensembl	548	chr20	-	32989954	32990502	NM_001791,NM_001039802,ENST00000421246,	CCTAAAGAATGTATTTGACGAAGCAATATTGGCTGCCCTGGAACCTCCAGAACCGAAGAA	intronic antisense	NM_031483	ITCH	E3 ubiquitin-protein ligase Itchy homolog	+	32951061	33099197
ASHG19A3A046508	2.62121	1.39024	2.62121	up	119.784	287.984	6.79411	8.18435	noncoding	AK125351		misc_RNA	3413	chr11	+	62341645	62345058		ATAAGGCCAGAACAGTTTCCCCAAATGTTGCTCACTGATCTTGTGAGACAGTGTGCGAAA	natural antisense	NM_022830	TUT1	speckle targeted PIP5K1A-regulated poly(A)	-	62342516	62359109
ASHG19A3A046508	2.62121	1.39024	2.62121	up	119.784	287.984	6.79411	8.18435	noncoding	AK125351		misc_RNA	3413	chr11	+	62341645	62345058		ATAAGGCCAGAACAGTTTCCCCAAATGTTGCTCACTGATCTTGTGAGACAGTGTGCGAAA	bidirectional	NM_001404	EEF1G	elongation factor 1-gamma	-	62327072	62341460
ASHG19A3A038907	2.1872	1.12909	2.1872	up	3461.63	7148.61	11.6587	12.7878	noncoding	ENST00000438325	RP13-93L13.2	Ensembl	1192	chr9	+	92064472	92065664	NM_006191,	ATTTGTTGCCCAGTTTAAATTTACAGTTCTGCTCCTGCCCAATGGCCCCATGCAGATAAC	intronic antisense	NM_006378	SEMA4D	semaphorin-4D isoform 1	-	91992151	92094611
ASHG19A3A038907	2.1872	1.12909	2.1872	up	3461.63	7148.61	11.6587	12.7878	noncoding	ENST00000438325	RP13-93L13.2	Ensembl	1192	chr9	+	92064472	92065664	NM_006191,	ATTTGTTGCCCAGTTTAAATTTACAGTTCTGCTCCTGCCCAATGGCCCCATGCAGATAAC	intronic antisense	NM_001142287	SEMA4D	semaphorin-4D isoform 2	-	91975705	92094611
ASHG19A3A020238	2.07452	1.05278	2.07452	up	454.295	809.811	8.69	9.74278	noncoding	ENST00000457759	AP000357.5	Ensembl	438	chr22	+	25082021	25082556		TTTCGTTCTTCCTGGAACACTTACTATACTAACACAGAGTTGATAATAGTTGTGGACAGT	intergenic
ASHG19A3L0000844	2.38788	1.25573	2.38788	up	113.565	251.166	6.71826	7.974	noncoding	BC009210	lincRNA-KIAA1199	lincRNA	2959	chr15	-	81239669	81282169		GAGGGTGAGACTAAGCCACTTTTCTTATGATACTTTTGTTGAATAAAGGGCCACTTTCCA	exon sense-overlapping	NM_015154	MESDC2	LDLR chaperone MESD	-	81268094	81282205
ASHG19A3L0000844	2.38788	1.25573	2.38788	up	113.565	251.166	6.71826	7.974	noncoding	BC009210	lincRNA-KIAA1199	lincRNA	2959	chr15	-	81239669	81282169		GAGGGTGAGACTAAGCCACTTTTCTTATGATACTTTTGTTGAATAAAGGGCCACTTTCCA	natural antisense	NM_018689	KIAA1199	KIAA1199 precursor	+	81071711	81243999
ASHG19A3A044135	2.4959	1.31956	2.4959	up	3157.21	7401.71	11.5116	12.8311	noncoding	AK130741		misc_RNA	1985	chr10	+	77246999	77248984		AAAGAGTTAGGACATCTCACTGTACAGCAGTCACCCCATTGTGGGCAAAACTATGTCAAC	intergenic
ASHG19A3A015736	3.30069	1.72277	3.30069	up	3077.61	10153.5	11.4802	13.2029	noncoding	ENST00000428806	AC007365.4	Ensembl	459	chr2	+	64892740	64893199	ENST00000408001,	TGAACTCCTTTTTAAGAAGGGAGTCATGGTGGCAAAGAAGGTTGTCCACATGCCTAAGCA	intergenic
ASHG19A3A025243	2.24633	1.16757	2.24633	up	685.044	1338.88	9.29035	10.4579	noncoding	ENST00000514075	GMPSP	Ensembl	574	chr4	+	8176147	8176721	NM_003875,	GTAGAGGTGGTATTAAAGATGGTCACTGAGATTAAGAAGATTCCTGGTATTTCTCGAATT	intergenic
ASHG19A3A028199	2.82071	1.49606	2.82071	up	305.999	748.652	8.13325	9.62931	noncoding	uc003jox.1	AK097288	UCSC_knowngene	3851	chr5	+	52251186	52255037		GGTGCATCAGCTGTGTATTTTACGTCAAGGTAAATGAGCATCCTGTTTTATATGTTAAAT	intergenic
ASHG19A3A000123	2.82331	1.49739	2.82331	up	1520.16	3936.23	10.4455	11.9429	noncoding	ENST00000417691	AC016747.3	Ensembl	892	chr2	-	61370689	61372087		AAACAAAAAATCACTGCATTACATCAGCAGgccggacgcggtggttcatgcctgtaatcc	bidirectional	NM_001143960	C2orf74	hypothetical protein LOC339804 isoform 2	+	61372242	61391964
ASHG19A3A037995	3.0887	1.627	3.0887	up	113.786	322.377	6.72123	8.34823	noncoding	AK123875		misc_RNA	2816	chr9	-	124577953	124580767		ATAAAACGCAATAATAAAACGAAGCTGAGTGTTGCTAAACACAGGCTCATTGTATAAACG	intergenic
ASHG19A3A038646	2.18559	1.12803	2.18559	up	4641.09	10578.3	12.1175	13.2455	noncoding	ENST00000411556	RBPJP6	Ensembl	1486	chr9	+	44471924	44473410	NM_203284,NM_203283,NM_015874,NM_005349,ENST00000451936,ENST00000357305,	GTTACACAAACGCCAGCACAAATTCAACCAGTGTCACATCATCTACACCAACAGTGGTAT	intergenic
ASHG19A3A038268	5.44834	2.44582	5.44834	up	161.428	767.376	7.22353	9.66935	noncoding	BC027323		misc_RNA	1869	chr9	-	140188319	140190173		AACCCAGCTCTTTCAACTCCCAAGGTTACTTTGTCAATAAAGTGCGCCTTCTCAAGTCTT	intergenic
ASHG19A3A036297	2.9713	1.57109	2.9713	up	410.232	1042.95	8.54624	10.1173	noncoding	ENST00000495129	RP11-745K9.1	Ensembl	422	chr8	+	5334069	5334491		GTTGAACTGCCTCCTGATTACGATGCTTTAGATGTTGCCGGCAAAATTGGGATTATCTAA	intergenic
ASHG19A3A036484	2.60641	1.38206	2.60641	up	2578.09	6234.36	11.2103	12.5923	noncoding	ENST00000480199	RP11-380I10.1	Ensembl	884	chr8	+	28157199	28158083		ATGTCCCTCACTCAGAAGAAAGATCAGGTAGCTCAAAAGAAGGCAAGCTTCCTCAGTTAG	intergenic
ASHG19A3A029265	2.91063	1.54133	2.91063	up	287.032	725.59	8.04053	9.58186	noncoding	AK022183		misc_RNA	1680	chr5	+	179204512	179206192		ACAGACTACTGTAGACACGGTAGCAACGTAGGTCTCTTAAGAAAGTGACACACAACGTAG	intergenic
CUST_13_PI426265844	4.58188	2.19594	4.58188	up	1573.98	6705.23	10.4949	12.6908	noncoding	FJ209302	mascRNA	lncRNAdb	61	chr11	+	65273587	65273645		ATGCTGGTGGTTGGCACTCCTGGTTTCCAGGACGGGGTTCAAATCCCTGCGGCGTCTCCA	intergenic
ASHG19A3A017004	2.4528	1.29443	2.4528	up	100.301	227.663	6.53386	7.82829	noncoding	ENST00000417355	AC114803.3	Ensembl	311	chr2	+	220163723	220168852		ATTTGGAGCCCTGTCTGTGCTTCCAGTTCAGACTTCACCAGCCCTGCAGGGAGGACAAAG	natural antisense	NM_002846	PTPRN	receptor-type tyrosine-protein phosphatase-like	-	220154344	220174295
ASHG19A3A017004	2.4528	1.29443	2.4528	up	100.301	227.663	6.53386	7.82829	noncoding	ENST00000417355	AC114803.3	Ensembl	311	chr2	+	220163723	220168852		ATTTGGAGCCCTGTCTGTGCTTCCAGTTCAGACTTCACCAGCCCTGCAGGGAGGACAAAG	natural antisense	NM_001199763	PTPRN	receptor-type tyrosine-protein phosphatase-like	-	220154344	220174295
ASHG19A3A017004	2.4528	1.29443	2.4528	up	100.301	227.663	6.53386	7.82829	noncoding	ENST00000417355	AC114803.3	Ensembl	311	chr2	+	220163723	220168852		ATTTGGAGCCCTGTCTGTGCTTCCAGTTCAGACTTCACCAGCCCTGCAGGGAGGACAAAG	natural antisense	NM_001199764	PTPRN	receptor-type tyrosine-protein phosphatase-like	-	220154344	220173729
ASHG19A3A052685	3.24784	1.69948	3.24784	up	300.834	846.309	8.10862	9.8081	noncoding	AF129930		RNAdb	873	chr15	+	28929535	28930408	uc010azc.2,NR_002824,	GCAAGAAGAAAATTCTCGTCCTTTTTCATTACTATCAGACTCAAATAAATGTCTTGGCTC	intergenic
ASHG19A3A000160	2.44024	1.28702	2.44024	up	279.774	599.248	8.00099	9.28801	noncoding	ENST00000423663	AC073218.2	Ensembl	1109	chr2	+	34902645	34947630		GGCCAACTAGTCATCAGTTTATTCATGTTTCTGGGATTGGATTCATGAACTCATCCTTTG	intergenic
ASHG19A3A023713	2.81962	1.4955	2.81962	up	640.887	1593.99	9.19547	10.691	noncoding	AK055652		NRED	3279	chr3	+	191113179	191116458	NM_178335,NM_174908,	GATAATGATGCCTGGTGTATTGAAATCCTCAATAAATACTGCCAAGTGTGGATCAGTTGG	exon sense-overlapping	NM_174908	CCDC50	coiled-coil domain-containing protein 50 short	+	191046873	191116459
ASHG19A3A023713	2.81962	1.4955	2.81962	up	640.887	1593.99	9.19547	10.691	noncoding	AK055652		NRED	3279	chr3	+	191113179	191116458	NM_178335,NM_174908,	GATAATGATGCCTGGTGTATTGAAATCCTCAATAAATACTGCCAAGTGTGGATCAGTTGG	exon sense-overlapping	NM_178335	CCDC50	coiled-coil domain-containing protein 50 long	+	191046873	191116459
ASHG19A3A000191	3.75099	1.90727	3.75099	up	747.044	2467.88	9.40991	11.3172	noncoding	ENST00000428846	CTC-564N23.1	Ensembl	388	chr5	+	76287640	76292870		tttgagacagaatcttactctgttgcccaggctgcagtgagccaagatcacaccattgca	intergenic
ASHG19A3A025966	2.27668	1.18693	2.27668	up	272.083	546.473	7.95896	9.14589	noncoding	ENST00000508691	RP11-548H18.1	Ensembl	521	chr4	+	120255483	120299388	NM_007246,NM_001161521,	ATTTCTGCTCATAGAGTGGTGCTGGCCGCCTGTAGTCCTTATTTTCATGCCATGTTTACA	intergenic
ASHG19A3A044131	3.06004	1.61355	3.06004	up	186.753	511.37	7.43046	9.04401	noncoding	uc001jxd.1	AK023445	UCSC_knowngene	1860	chr10	+	77056147	77121436		ACTTCTTTATGAAGGACTCCAGCCTGGTGGAGATGAATGAGTCCTGAAGATGGAATCGAA	intergenic
ASHG19A3A042677	3.07785	1.62192	3.07785	up	344.334	912.207	8.30198	9.9239	noncoding	ENST00000401429	RP11-272J7.5	Ensembl	1139	chr10	-	44284696	44285835	NR_002726,NM_194247,ENST00000434355,ENST00000393361,	TGGACAACAGCAATCAAATTATGGACACATGAAAGGGGGCAGTTTTGGTGGAAGAAGCTC	intergenic
ASHG19A3A010592	4.81833	2.26853	4.81833	up	1062.51	4751.37	9.92717	12.1957	noncoding	CR597075		NRED	1722	chr18	+	32721704	32723425		CACCTATTGTCGCATGGTAGAATAGTTTTTTGTCTCTGAATATGTGAATAACTTGACTTG	exon sense-overlapping	NM_014268	MAPRE2	microtubule-associated protein RP/EB family	+	32621323	32722378
ASHG19A3A010592	4.81833	2.26853	4.81833	up	1062.51	4751.37	9.92717	12.1957	noncoding	CR597075		NRED	1722	chr18	+	32721704	32723425		CACCTATTGTCGCATGGTAGAATAGTTTTTTGTCTCTGAATATGTGAATAACTTGACTTG	exon sense-overlapping	NM_001143826	MAPRE2	microtubule-associated protein RP/EB family	+	32556891	32722378
ASHG19A3A010592	4.81833	2.26853	4.81833	up	1062.51	4751.37	9.92717	12.1957	noncoding	CR597075		NRED	1722	chr18	+	32721704	32723425		CACCTATTGTCGCATGGTAGAATAGTTTTTTGTCTCTGAATATGTGAATAACTTGACTTG	exon sense-overlapping	NM_001143827	MAPRE2	microtubule-associated protein RP/EB family	+	32558207	32722378
ASHG19A3A031033	2.09301	1.06558	2.09301	up	86.4136	173.016	6.32739	7.39297	noncoding	BC046172		RNAdb	525	chr6	+	17707072	17707569		CGGTTGGTTAAGTAGGCAGGAAGTAAGCAGACAGTAAAATCAAAGACAAGAGCTAATGAT	bidirectional	NM_005124	NUP153	nuclear pore complex protein Nup153	-	17615268	17706818
ASHG19A3A038009	2.54802	1.34938	2.54802	up	869.323	1929.32	9.63724	10.9866	noncoding	uc004bnb.1	AL833455	UCSC_knowngene	3939	chr9	-	125606834	125610773	uc.268-,	GTGTTTGAGAGAAAATTGATGGAAAAAGTTTGCAGTACTTGACATGTATTTGCATGCACA	intergenic
ASHG19A3A046498	3.33989	1.7398	3.33989	up	218.372	638.977	7.64679	9.38659	noncoding	ENST00000447217	AP002793.1	Ensembl	534	chr11	+	61936758	61937294		TGACATTGACCTTTTTGGCAGCAACAATGAGGAGGAGGACGAGGAGGCAGCACAGCTGCG	intergenic
ASHG19A3A008416	2.72549	1.44652	2.72549	up	513.868	1206.1	8.87771	10.3242	noncoding	ENST00000423212	RP11-18E13.1	Ensembl	1072	chr1	-	178715817	178716889	NM_080422,NM_002828,	CACCACAGCTCAGAAGGTGCAGCAGATGAAATAGAGGCTAAATGAGAATGAACGAAAAAG	intronic antisense	NM_152663	RALGPS2	ras-specific guanine nucleotide-releasing factor	+	178694299	178889237
ASHG19A3A048600	3.93833	1.97759	3.93833	up	78.1095	282.852	6.18043	8.15802	noncoding	ENST00000469738	RP11-416A17.1	Ensembl	323	chr12	+	51500604	51500927		AGAGTAATTTGGGGAAAGATAACTTGGACACAGAGACAGTGGCATGGTTCGTGCCAAATT	intronic antisense	NM_005653	TFCP2	alpha-globin transcription factor CP2 isoform 1	-	51487538	51566926
ASHG19A3A048600	3.93833	1.97759	3.93833	up	78.1095	282.852	6.18043	8.15802	noncoding	ENST00000469738	RP11-416A17.1	Ensembl	323	chr12	+	51500604	51500927		AGAGTAATTTGGGGAAAGATAACTTGGACACAGAGACAGTGGCATGGTTCGTGCCAAATT	intronic antisense	NM_001173452	TFCP2	alpha-globin transcription factor CP2 isoform 2	-	51487538	51566926
ASHG19A3A048600	3.93833	1.97759	3.93833	up	78.1095	282.852	6.18043	8.15802	noncoding	ENST00000469738	RP11-416A17.1	Ensembl	323	chr12	+	51500604	51500927		AGAGTAATTTGGGGAAAGATAACTTGGACACAGAGACAGTGGCATGGTTCGTGCCAAATT	intronic antisense	NM_001173453	TFCP2	alpha-globin transcription factor CP2 isoform 3	-	51487538	51566926
ASHG19A3A029379	3.40023	1.76563	3.40023	up	309.195	907.336	8.14889	9.91452	noncoding	ENST00000421896	RP11-288G3.2	Ensembl	1501	chr6	-	7481326	7482827	NM_001533,	CCATTACCAGATGAAAAACCCAAGTGGTCCATACCTTACACTCTGAAGCTGTGTTTCTCC	intergenic
ASHG19A3A055136	2.0592	1.04208	2.0592	up	87.232	171.864	6.34001	7.3821	noncoding	uc002hgd.1	AF086476	UCSC_knowngene	266	chr17	+	29351202	29358601		TTGGATTTATGCAAACCTGGGCCAAAGGACAGTTAGAAGACGACGGAGTTTCACTCTTGT	intergenic
ASHG19A3A024714	3.56609	1.83434	3.56609	up	4571.31	19008.5	12.0947	13.9291	noncoding	ENST00000420977	RP5-1102E8.2	Ensembl	750	chr1	+	77165473	77166223	NR_027483,NM_001159287,NM_000365,	TCTCTGATGCGGTGGCTCAGAGCACCCGTATCATTTATGGAGGCTCTGTGACTGGGGCAA	intergenic
ASHG19A3A046402	2.79855	1.48468	2.79855	up	284.745	691.995	8.02806	9.51274	noncoding	ENST00000482972	RP11-444K7.1	Ensembl	894	chr11	+	56124803	56125697		TTATGAAGAAGAGGCAGAACCATCCCAGAATGTCCCTTGCTCAGAAGAAAGATTGGGTAG	intergenic
ASHG19A3A029224	3.64196	1.86472	3.64196	up	246.623	774.36	7.81611	9.68083	noncoding	ENST00000457776	RP11-423O2.6	Ensembl	1746	chr1	+	142803531	142827235	uc011abu.1,ENST00000430699,ENST00000416817,	CAAAGAAAGAAAGATTGGGAAAACGTATCCTCAGCAATTTCCCAAGAAACTGAAGGAAGA	intergenic
ASHG19A3A035698	2.02469	1.0177	2.02469	up	1181.13	2091.04	10.0729	11.0906	noncoding	AK025702		misc_RNA	2435	chr8	-	38127219	38129627		CATTCCACTGATTTCAGATTTTGCTTGAGATTGACTTCAATAAATTGTCCTGTATGTTCC	intergenic
ASHG19A3A036677	15.0995	3.91642	15.0995	up	126.324	1700.63	6.87148	10.7879	noncoding	AK123390		misc_RNA	2316	chr8	+	69146036	69148345		CAGGATAGCTTGCTCCTCTCGCTGAGAAGAGATACCTGAAGTCTACTAAGTCTACTAAAT	intergenic
ASHG19A3A007403	3.1357	1.64879	3.1357	up	822.075	2270.77	9.55188	11.2007	noncoding	NR_026723	SARNP	RefSeq_NR	1195	chr12	-	56146246	56211540	NR_026722,	CGCAATGAGGGAGCATGTACCCCAGGTTCAAGTGCTGGATTGTGTCATGTGACCATCCCA	exon sense-overlapping	NM_033082	SARNP	SAP domain-containing ribonucleoprotein	-	56151053	56211540
ASHG19A3A007403	3.1357	1.64879	3.1357	up	822.075	2270.77	9.55188	11.2007	noncoding	NR_026723	SARNP	RefSeq_NR	1195	chr12	-	56146246	56211540	NR_026722,	CGCAATGAGGGAGCATGTACCCCAGGTTCAAGTGCTGGATTGTGTCATGTGACCATCCCA	natural antisense	NM_005811	GDF11	growth/differentiation factor 11 precursor	+	56137063	56146665
ASHG19A3A007403	3.1357	1.64879	3.1357	up	822.075	2270.77	9.55188	11.2007	noncoding	NR_026723	SARNP	RefSeq_NR	1195	chr12	-	56146246	56211540	NR_026722,	CGCAATGAGGGAGCATGTACCCCAGGTTCAAGTGCTGGATTGTGTCATGTGACCATCCCA	bidirectional	NM_014182	ORMDL2	ORM1-like protein 2	+	56211805	56214959
ASHG19A3A019495	2.29364	1.19764	2.29364	up	95.8126	205.721	6.47387	7.67151	noncoding	ENST00000424817	XXbac-B33L19.11	Ensembl	879	chr22	-	20486311	20488882	ENST00000481698,	AATGGACACTGATCCTCAGAACCACCTGGAGATTTGGGAGGCTGGGCTGCTGTTGCCTGT	intergenic
ASHG19A3A024455	3.15684	1.65848	3.15684	up	814.171	2266.11	9.54015	11.1986	noncoding	ENST00000514631	RP11-397E7.4	Ensembl	1110	chr4	-	87834418	87835970		TACTGACATCGGTGGAGCCATGACAATTTAGGATTTCAAGACTCTCGAGTCTTCCATCCA	intergenic
ASHG19A3A014232	2.02274	1.01631	2.02274	up	388.391	679.175	8.46897	9.48528	noncoding	ENST00000416673	RPL23AP7	Ensembl	1885	chr2	-	114368271	114384617	ENST00000513236,	ATTGAGAGACACACATAGTGGTCAAACACGATTTCAGCCATGAATCAGGCATAAATATTC	bidirectional	NM_007082	RABL2A	rab-like protein 2A	+	114384816	114400975
ASHG19A3A014232	2.02274	1.01631	2.02274	up	388.391	679.175	8.46897	9.48528	noncoding	ENST00000416673	RPL23AP7	Ensembl	1885	chr2	-	114368271	114384617	ENST00000513236,	ATTGAGAGACACACATAGTGGTCAAACACGATTTCAGCCATGAATCAGGCATAAATATTC	bidirectional	NM_013412	RABL2A	rab-like protein 2A	+	114384816	114400975
ASHG19A3A034997	2.77641	1.47322	2.77641	up	933.009	2275.81	9.73192	11.2051	noncoding	ENST00000468716	RP4-560B9.4	Ensembl	569	chr1	+	171731213	171731782		GATTGTCCTTCCAAATGGCTGTATTTATAAAGGTTTTTGGAGCTGTACTGAAACATCTTA	intergenic
ASHG19A3A038460	2.2242	1.15329	2.2242	up	815.038	1599.12	9.54196	10.6952	noncoding	ENST00000452970	RP11-441F11.1	Ensembl	1269	chr9	+	30773461	30774730		AACTAACTCCATACAAACCATCCGAAAGACTGCCACCCGCTGGATAGTGGATTGTAAAGT	intergenic
ASHG19A3A048055	2.1739	1.12029	2.1739	up	111.515	225.465	6.69211	7.81239	noncoding	ENST00000485147	RP11-407P2.1	Ensembl	480	chr12	-	117193199	117193679		AAATGATCAGAAAAAGAAAGAAGCGGAAGAGAAAGGTACCTGGGTTCAACTCAAGCGCCA	intronic antisense	NM_032814	RNFT2	RING finger and transmembrane domain-containing	+	117176095	117291436
ASHG19A3A048055	2.1739	1.12029	2.1739	up	111.515	225.465	6.69211	7.81239	noncoding	ENST00000485147	RP11-407P2.1	Ensembl	480	chr12	-	117193199	117193679		AAATGATCAGAAAAAGAAAGAAGCGGAAGAGAAAGGTACCTGGGTTCAACTCAAGCGCCA	intronic antisense	NM_001109903	RNFT2	RING finger and transmembrane domain-containing	+	117176095	117291436
ASHG19A3A048104	3.03322	1.60085	3.03322	up	144.597	394.524	7.06325	8.6641	noncoding	AL110147		NRED	1276	chr12	-	121200317	121201569		GCTCCAAAATGACTCGGATTAAGGGCAAGTGCCAGTGATGGGTAGAAATAACGTTATCCT	exon sense-overlapping	NM_139015	SPPL3	signal peptide peptidase-like 3	-	121201034	121342151
ASHG19A3A038985	3.01035	1.58993	3.01035	up	3235.1	9649.3	11.5518	13.1417	noncoding	ENST00000432132	RP11-569G13.1	Ensembl	1835	chr9	+	98908306	98910141	NM_001417,	AAATCCAGCTTCCAAGTTCAGTTCTGCAAGCAAGTATGCTGCTCTCTCTGTTGATGGTGA	intergenic
ASHG19A3A028526	2.47921	1.30988	2.47921	up	156.32	352.545	7.17712	8.487	noncoding	ENST00000506586	CTC-303L1.1	Ensembl	2021	chr5	+	93928475	93930496		ACAAAGGATGCTTGGATGGACTACCTGAGAGAACATGCATTTAGAGAAGTCGAATCATGA	intronic antisense	NM_001145678	KIAA0825	hypothetical protein LOC285600 isoform 1	-	93486555	93954309
ASHG19A3A028526	2.47921	1.30988	2.47921	up	156.32	352.545	7.17712	8.487	noncoding	ENST00000506586	CTC-303L1.1	Ensembl	2021	chr5	+	93928475	93930496		ACAAAGGATGCTTGGATGGACTACCTGAGAGAACATGCATTTAGAGAAGTCGAATCATGA	intronic antisense	NM_173665	KIAA0825	hypothetical protein LOC285600 isoform 2	-	93854917	93954309
ASHG19A3A028579	2.92168	1.5468	2.92168	up	91.6846	248.328	6.41045	7.95725	noncoding	AJ227862		misc_RNA	457	chr5	+	102118475	102118934		AGGAAAATTGTATGTCAGGGTGTATTTCTGTGTGGGGTTGCAAGGGCAGGAAAGAAAAAA	intergenic
ASHG19A3A028678	2.31204	1.20917	2.31204	up	2623.57	5678.89	11.2379	12.4471	noncoding	ENST00000354355	CTB-161M19.3	Ensembl	330	chr5	+	118309490	118309820	NM_001099285,ENST00000421078,	TCCGAAATCACCACCAAGGACTTACAGGAGAAGAAGGAAGTTGTGGAAGAGGCAGAAAAT	intronic antisense	NM_173666	DTWD2	DTW domain-containing protein 2	-	118172568	118324240
ASHG19A3A035832	2.56353	1.35813	2.56353	up	4402.16	11959.7	12.0303	13.3885	noncoding	NR_002599	SNHG6	RefSeq_NR	472	chr8	-	67834164	67837777		TTTCCAAAAACTTGTAGAAGGTTGTGAAAAAACTACTAGGATCACGCGGCATGTATTGAG	natural antisense	NM_173518	C8orf45	minichromosome maintenance complex	+	67782983	67834283
ASHG19A3A018502	27.9497	4.80476	27.9497	up	103.166	2593.95	6.5778	11.3826	noncoding	BC002831		misc_RNA	1013	chr20	+	57209827	57210789		CTTCCCTATTCCATCCTTTGATGGGTGGCCTGTTACACGTTTGGAAATAAAAACAAGTGG	intergenic
ASHG19A3A048328	5.19458	2.37701	5.19458	up	135.685	623.67	6.97387	9.35088	noncoding	uc001qug.3	FAM66C	UCSC_knowngene	2167	chr12	+	8332804	8368747		TAATACGTAAGTTTGGAGGTGGATGCTTTCAGCCATTAAGTTCAAAAGTACTGCCACAAG	intergenic
ASHG19A3A040085	3.02429	1.5966	3.02429	up	709.402	1862.99	9.33652	10.9331	noncoding	ENST00000393214	AC004386.4	Ensembl	761	chrX	-	73595959	73596720		TCTCAATCTCTCTAAAGATGATGTTTGCCAAGTATGTTGTAAGAAAGCCCTTAAACAAAG	intergenic
ASHG19A3A013990	2.10823	1.07603	2.10823	up	97.9681	194.296	6.50213	7.57816	noncoding	uc001abs.2	AK091100	UCSC_knowngene	2682	chr1	+	791897	794579		TAAGCTCTCTATTAAGTTGAGAAAATGGGAACTTCAGGTGATCATGTGAGATATTCAAGT	intergenic
ASHG19A3A007197	2.23184	1.15823	2.23184	up	132.028	272.305	6.93707	8.09531	noncoding	NR_023312	CIRBP	RefSeq_NR	3312	chr19	+	1269266	1274809		CGTCAGGGACCTGCCCGACTCAGTGGAAGCGGGGAGAGGTGGTGAGAGATGACCCCTGTT	exon sense-overlapping	NM_001280	CIRBP	cold-inducible RNA-binding protein	+	1269266	1273171
ASHG19A3A023415	2.05615	1.03994	2.05615	up	151.808	286.756	7.1387	8.17864	noncoding	ENST00000488408	RP11-217E22.1	Ensembl	464	chr3	+	153741623	153742087		ATTAAGCACTCTAAGACCCGAAATAGCTTCCTGAAACGCGTGAAGGAAAATGATCAGAAA	intergenic
ASHG19A3A015962	2.02314	1.0166	2.02314	up	571.641	994.779	9.03223	10.0488	noncoding	uc010fhn.2	AY685359	UCSC_knowngene	286	chr2	+	90273947	90274233	ENST00000421835,	TCAGCAGCCTGCAGCCTGAAGATTTTGCAGTTTATTACTGTCAGCAGGATTATAACTTAC	intergenic
ASHG19A3A022415	2.92091	1.54642	2.92091	up	2871.74	8007.45	11.3736	12.92	noncoding	HIT000018626		H-invDB	2814	chr3	+	32527046	32529858		AGAGGTGGCATGAGCCTGTAGTCCCAGCTAACTGGGACATTTTTTATTATCCAGTCCAAA	natural antisense	NM_017801	CMTM6	CKLF-like MARVEL transmembrane domain-containing	-	32522803	32544403
ASHG19A3A042012	5.57095	2.47792	5.57095	up	308.215	1517.66	8.14507	10.623	noncoding	NR_033381	NCRNA00103	RefSeq_NR	1113	chrY	+	2477305	2506369	ENST00000430562,	CCTTGTTCCCAGGGTCCACATTTAGTTTTATCTTTACTGCATTGCTTTTATGAAAAAGAA	intergenic
ASHG19A3A025720	2.19192	1.1322	2.19192	up	118.08	239.737	6.77212	7.90431	noncoding	ENST00000478593	RP11-109G23.1	Ensembl	252	chr4	+	79689652	79689904		TCAGATGACTACATTCTCTGATTGGCCAAGGCCAGTGGCATCATCTGAAAACATGTTTGA	intergenic
ASHG19A3A041619	2.98827	1.57931	2.98827	up	629.766	1657.81	9.16636	10.7457	noncoding	ENST00000416838	RP11-364B14.2	Ensembl	1137	chrX	+	139114502	139115639	NM_194247,ENST00000434355,ENST00000393361,	TAGTGGACAACAGCAATCAAATTATGGACCCATGAAAGGGGGCAGTTTTGGTGGAAGACA	intergenic
ASHG19A3A011940	3.10704	1.63554	3.10704	up	1406.79	3974.75	10.3217	11.9573	noncoding	ENST00000499062	AC020915.1	Ensembl	2270	chr19	-	58768638	58790174		AATTCAGATAAACTCAACATCTCCAGCCTGGGGGAAACGTGAGAGGGTGGTATGAAGATA	bidirectional	NM_021089	ZNF8	zinc finger protein 8	+	58790317	58807254
ASHG19A3A011940	3.10704	1.63554	3.10704	up	1406.79	3974.75	10.3217	11.9573	noncoding	ENST00000499062	AC020915.1	Ensembl	2270	chr19	-	58768638	58790174		AATTCAGATAAACTCAACATCTCCAGCCTGGGGGAAACGTGAGAGGGTGGTATGAAGATA	intronic antisense	NM_014480	ZNF544	zinc finger protein 544	+	58740069	58775008
ASHG19A3A008714	3.30146	1.7231	3.30146	up	1695.79	5181.57	10.5957	12.3188	noncoding	NR_026899	LOC146880	RefSeq_NR	2879	chr17	-	62745780	62778117	NM_182641,NM_004459,	GTGTGCAGTTAAACCAGTTGTGATGCTACCAATATGGCGAGAATCTTTAGGACATACCAG	intergenic
ASHG19A3A029868	6.20553	2.63355	6.20553	up	318.084	1753.79	8.19574	10.8293	noncoding	uc003ooz.1	AX747174	UCSC_knowngene	3053	chr6	-	39851291	39854344		GAGTCACCCCTGTCCTTGGCAGCCATCATTGGAAGATTAAAGCCATACATATTTTGGATC	natural antisense	NM_001201427	DAAM2	disheveled-associated activator of morphogenesis	+	39760158	39872653
ASHG19A3A029868	6.20553	2.63355	6.20553	up	318.084	1753.79	8.19574	10.8293	noncoding	uc003ooz.1	AX747174	UCSC_knowngene	3053	chr6	-	39851291	39854344		GAGTCACCCCTGTCCTTGGCAGCCATCATTGGAAGATTAAAGCCATACATATTTTGGATC	natural antisense	NM_015345	DAAM2	disheveled-associated activator of morphogenesis	+	39760772	39872653
ASHG19A3A046860	2.23646	1.16122	2.23646	up	1925.37	3950.44	10.7879	11.9491	noncoding	ENST00000425126	AP004242.2	Ensembl	345	chr11	+	93268634	93268981		TTGGAGAGCGAGCAGCTCCTGACGGAGCTGACCAGACTTTTCCAGAAGTGCTGGACATCA	intronic antisense	NM_020179	C11orf75	hypothetical protein LOC56935	-	93211638	93276546
ASHG19A3A030348	2.51876	1.33271	2.51876	up	6453.9	18606.1	12.5653	13.898	noncoding	ENST00000417878	RP1-111B22.2	Ensembl	1212	chr6	-	108325560	108326772	NM_001033853,NM_000967,ENST00000437106,ENST00000417615,ENST00000413027,	AAGAAAGCATTCATGGGACCACTCAAGAAAGACGGAATTGCAAAGGAAGAAGGAGCTTAA	intergenic
ASHG19A3A014453	5.61672	2.48973	5.61672	up	262.6	1280.29	7.90825	10.398	noncoding	NR_033258	ZEB2	RefSeq_NR	3026	chr2	-	145268951	145277958		GACAGTCATGTCAGAGTGAAATCTCTCAGGAAAAGTGTAACTAGTAGTTACAAAGTAAAT	exon sense-overlapping	NM_001171653	ZEB2	zinc finger E-box-binding homeobox 2 isoform 2	-	145141941	145277958
ASHG19A3A014453	5.61672	2.48973	5.61672	up	262.6	1280.29	7.90825	10.398	noncoding	NR_033258	ZEB2	RefSeq_NR	3026	chr2	-	145268951	145277958		GACAGTCATGTCAGAGTGAAATCTCTCAGGAAAAGTGTAACTAGTAGTTACAAAGTAAAT	exon sense-overlapping	NM_014795	ZEB2	zinc finger E-box-binding homeobox 2 isoform 1	-	145141941	145277958
CUST_633_PI426073487	2.78537	1.47787	2.78537	up	55.182	148.635	5.67356	7.15143	noncoding	uc.154-	uc.154	UCR	203	chr5	-	72210014	72210217		GGTGGCCCCAAAAAACTCTCTTTAAAATTCAGCAGCTTATCAAAAATTAAAACCGTATTC	natural antisense	NM_002270	TNPO1	transportin-1 isoform 1	+	72112417	72210215
CUST_633_PI426073487	2.78537	1.47787	2.78537	up	55.182	148.635	5.67356	7.15143	noncoding	uc.154-	uc.154	UCR	203	chr5	-	72210014	72210217		GGTGGCCCCAAAAAACTCTCTTTAAAATTCAGCAGCTTATCAAAAATTAAAACCGTATTC	natural antisense	NM_153188	TNPO1	transportin-1 isoform 2	+	72143929	72210215
ASHG19A3A045196	2.30364	1.20392	2.30364	up	3407.4	7440.67	11.6364	12.8403	noncoding	ENST00000395084	AP000662.1	Ensembl	495	chr11	-	57485517	57486014		GGACAAAAAGGATTTGGTTGTAAGAGTTCCTGCTTTCACAGAATTATTCCAGGGTTTATG	intronic antisense	NM_015959	TMX2	thioredoxin-related transmembrane protein 2	+	57479994	57508445
ASHG19A3A045196	2.30364	1.20392	2.30364	up	3407.4	7440.67	11.6364	12.8403	noncoding	ENST00000395084	AP000662.1	Ensembl	495	chr11	-	57485517	57486014		GGACAAAAAGGATTTGGTTGTAAGAGTTCCTGCTTTCACAGAATTATTCCAGGGTTTATG	intronic antisense	NM_001144012	TMX2	thioredoxin-related transmembrane protein 2	+	57479994	57508445
ASHG19A3A028815	2.52636	1.33706	2.52636	up	7045.58	20806.4	12.6926	14.0296	noncoding	ENST00000471205	RP11-215P8.1	Ensembl	498	chr5	+	133758528	133759026		TCAATGAGGGTATCCAGTATCTCCATGATTACCTTCATCTGCTCCTGGAAATTGTGCCTG	intergenic
ASHG19A3A018458	6.68159	2.74019	6.68159	up	135.499	791.395	6.97242	9.71261	noncoding	AF230201		misc_RNA	679	chr20	+	52105494	52106164		ACATAATTCAGATCTCACTGCAACCATCCAAAAGTGGATTCTCGAGCCCTTGCTCCAATG	exon sense-overlapping	NM_001193421	TSHZ2	teashirt homolog 2 isoform 2	+	51801821	52111869
ASHG19A3A018458	6.68159	2.74019	6.68159	up	135.499	791.395	6.97242	9.71261	noncoding	AF230201		misc_RNA	679	chr20	+	52105494	52106164		ACATAATTCAGATCTCACTGCAACCATCCAAAAGTGGATTCTCGAGCCCTTGCTCCAATG	exon sense-overlapping	NM_173485	TSHZ2	teashirt homolog 2 isoform 1	+	51588945	52111869
ASHG19A3A019402	2.21256	1.14572	2.21256	up	2751.83	5720.8	11.3096	12.4553	noncoding	ENST00000427757	RPL23AP4	Ensembl	463	chr21	+	48110675	48111138	uc010euw.2,NR_029406,NR_026982,NR_026981,NR_024529,NR_024528,NR_000029,ENST00000487264,ENST00000476406,ENST00000416673,	TGTTCGACTTGCTCCTGATTATGATGCTTTCGATGTTGTAACAAAATTGGGATCACCTAA	intergenic
ASHG19A3A036800	2.55243	1.35187	2.55243	up	8160.43	25227.6	12.9246	14.2764	noncoding	ENST00000391676	RPS26P6	Ensembl	414	chr8	+	101907998	101908412	NR_002309,NM_001029,ENST00000470205,	GAGTTCTTAAAGACTGAAGACAGGCTGTTCTCTGGAGAAAAATAAAATGGAAATTGTACT	intergenic
ASHG19A3A041480	2.74306	1.45579	2.74306	up	46.1758	124.703	5.41977	6.87556	noncoding	ENST00000436852	RP11-229N15.1	Ensembl	1203	chrX	+	121672105	121673308		TGAAGAAGAAAGCATTCGTGAGACCACTCAAGAAAGACCAAATTGCAAAGGAAGAAGGTG	intergenic
ASHG19A3A007765	4.36662	2.12652	4.36662	up	971.562	3834.19	9.78833	11.9148	noncoding	NR_033363	ATG12	RefSeq_NR	4446	chr5	-	115163894	115177548		ACCTGCTGGCGACACCAAGAAAAAAAATGACAGTGGTCTCTGGCCGGGCGCGGTGGCTCA	exon sense-overlapping	NM_004707	ATG12	ubiquitin-like protein ATG12	-	115163893	115177548
ASHG19A3A007765	4.36662	2.12652	4.36662	up	971.562	3834.19	9.78833	11.9148	noncoding	NR_033363	ATG12	RefSeq_NR	4446	chr5	-	115163894	115177548		ACCTGCTGGCGACACCAAGAAAAAAAATGACAGTGGTCTCTGGCCGGGCGCGGTGGCTCA	bidirectional	NM_001284	AP3S1	AP-3 complex subunit sigma-1	+	115177618	115249778
ASHG19A3A044017	5.5863	2.48189	5.5863	up	543.248	2692.45	8.95325	11.4351	noncoding	ENST00000404883	ANXA2P3	Ensembl	1008	chr10	+	66585328	66586336	NR_001446,	ATTACATCCAGCAAGACACTAAGAACGACTACCCAAAAAGCACTGCTGTACCTGTGTGGT	intergenic
ASHG19A3A046014	2.37271	1.24654	2.37271	up	451.285	913.867	8.68063	9.92717	noncoding	AK024684		misc_RNA	2682	chr1	-	54635332	54637997		GGTAAATCTGGGCAATGAGTTCCCCAATGTCTACTATATTATTTTCTACCTTTTTCTGTT	intergenic
ASHG19A3A039872	2.5606	1.35648	2.5606	up	391.339	861.349	8.4795	9.83598	noncoding	ENST00000425245	KRT18P12	Ensembl	1273	chr1	+	214705537	214706810		AATCTTCAATCTTGGTGATGGACAGCAGCAACTCCACGCAAACCATTCAAAAGACCACCA	intronic antisense	NM_005401	PTPN14	tyrosine-protein phosphatase non-receptor type	-	214522038	214725024
ASHG19A3A018644	2.78473	1.47754	2.78473	up	207.715	516.078	7.58111	9.05865	noncoding	ENST00000449602	AJ006998.2	Ensembl	1000	chr21	-	16742840	16774624		TTGCTATAAAGAGTAGGCAAATGGAAATCTTTCCCCAAAGGGCACACTGGGATTGTTAGG	intergenic
ASHG19A3A043334	2.11116	1.07804	2.11116	up	273.822	513.203	7.97059	9.04863	noncoding	uc001lcv.1	DQ596646	UCSC_knowngene	2195	chr10	-	118588285	118590480		AGGCAACTGGTGTTTCTGCGAGAATGGAATGGAATGTGGTTGAAATTTTGTGTTGTTTTT	intergenic
ASHG19A3A025922	2.49275	1.31774	2.49275	up	1138.58	2511.73	10.0221	11.3398	noncoding	ENST00000407499	RP11-148B6.4	Ensembl	447	chr4	+	113606210	113606659		TTAAATTTTTTCATGGCTGGAGTATTCATGAGAATGAAACTGCCGGGCTATCTGATGGGT	intergenic
ASHG19A3A008035	2.50203	1.3231	2.50203	up	3349.49	8092.47	11.6082	12.9313	noncoding	NR_026718	FOXO3B	RefSeq_NR	7259	chr17	-	18569235	18576494	NM_201559,NM_001455,	CCGTAATCTAGTTTGTAAAAGAGATGGTGACGCATGTAAATAAAGCATCAGTGACACTCT	exon sense-overlapping	NM_001145045	ZNF286B	putative zinc finger protein 286B	-	18561741	18585572
ASHG19A3A017842	2.17122	1.11851	2.17122	up	562.016	1048.23	9.00757	10.1261	noncoding	AK024545		misc_RNA	416	chr20	-	56803998	56804348		TTCCTAACAGCAGCAAGAATGCCCCTTCCGTTTGCCTGGTGAAAAGAACTGACATTAACA	intergenic
ASHG19A3A016403	2.62925	1.39465	2.62925	up	181.571	430.507	7.39257	8.78722	noncoding	AK023645		misc_RNA	1822	chr2	+	135715088	135716915		GGTTTCATTTTCTGAATGTACTCAAAACTCCCAACAACAATTGAACAGGATGTTTGCTAA	exon sense-overlapping	NM_058241	CCNT2	cyclin-T2 isoform b	+	135676391	135716915
ASHG19A3A016403	2.62925	1.39465	2.62925	up	181.571	430.507	7.39257	8.78722	noncoding	AK023645		misc_RNA	1822	chr2	+	135715088	135716915		GGTTTCATTTTCTGAATGTACTCAAAACTCCCAACAACAATTGAACAGGATGTTTGCTAA	exon sense-overlapping	NM_001241	CCNT2	cyclin-T2 isoform a	+	135676391	135716915
ASHG19A3A031329	2.76326	1.46637	2.76326	up	1264.27	3143.31	10.1731	11.6395	noncoding	uc003nza.2	RP	UCSC_knowngene	592	chr6	+	31981166	31981960	NR_026717,NM_004197,	GCAGGGTTCTTTTCTCTACGTGTCATGTTAAAATTGCCAAATAAAGTACCTCTGCCTGTG	exon sense-overlapping	NM_032454	STK19	serine/threonine-protein kinase 19 isoform 2	+	31981517	31981961
ASHG19A3A031329	2.76326	1.46637	2.76326	up	1264.27	3143.31	10.1731	11.6395	noncoding	uc003nza.2	RP	UCSC_knowngene	592	chr6	+	31981166	31981960	NR_026717,NM_004197,	GCAGGGTTCTTTTCTCTACGTGTCATGTTAAAATTGCCAAATAAAGTACCTCTGCCTGTG	exon sense-overlapping	NM_004197	STK19	serine/threonine-protein kinase 19 isoform 1	+	31981517	31981961
ASHG19A3A031329	2.76326	1.46637	2.76326	up	1264.27	3143.31	10.1731	11.6395	noncoding	uc003nza.2	RP	UCSC_knowngene	592	chr6	+	31981166	31981960	NR_026717,NM_004197,	GCAGGGTTCTTTTCTCTACGTGTCATGTTAAAATTGCCAAATAAAGTACCTCTGCCTGTG	bidirectional	NM_032470	TNXB	tenascin-X isoform 2	-	31976196	31981050
ASHG19A3A034296	2.16305	1.11306	2.16305	up	135.73	270.744	6.9741	8.08717	noncoding	ENST00000459691	EPS15L2	Ensembl	2071	chr7	+	46820970	46823041		CAAGGTGCTATTGATCTGGGTTAATCTGAGTAACTTATTGTCTAGCCTATAAATAAGTTC	intergenic
ASHG19A3A040123	3.03396	1.6012	3.03396	up	897.44	2405.07	9.67819	11.2794	noncoding	ENST00000399580	RP11-62C22.1	Ensembl	1115	chrX	-	83003832	83004947	NM_017489,	ATCCTCAGAGGGTACAGTATCCTTATTGAGGTCTCACAAGAATCTTTTCTTATCTAAGAT	intergenic
ASHG19A3A040463	2.0065	1.00468	2.0065	up	193.293	352.777	7.48307	8.48775	noncoding	ENST00000419413	RP1-20J23.1	Ensembl	579	chrX	-	136523416	136523995		GGATGATAAAGACAGGATCCAGAAACTGAAGGAGAAGAAGCTAACTCCCATCACCTATCC	intergenic
ASHG19A3A020097	2.22805	1.15578	2.22805	up	11575.8	33998.5	13.4456	14.6014	noncoding	ENST00000420617	AC000078.5	Ensembl	682	chr22	+	19874811	19875493		TGCCACTGCAGAGATGTCTCTGCTGGTAGCAAAGTGGGTCTCATTGCTGCCCACTGGACT	intronic antisense	NM_006440	TXNRD2	"thioredoxin reductase 2, mitochondrial"	-	19863039	19929359
ASHG19A3A048410	4.48862	2.16627	4.48862	up	730.262	2915.88	9.37697	11.5432	noncoding	AK125103		misc_RNA	2466	chr12	+	14653398	14655865		TTGAGCCAGCCAATGGGGAGGAATAGGATAATGCAAACACATGTTTTGTTTTCTCATTTT	intergenic
ASHG19A3A012627	2.76205	1.46574	2.76205	up	539.233	1288.3	8.94205	10.4078	noncoding	ENST00000443870	LOC147976	Ensembl	2607	chr19	+	38320190	38322797		TCAGATCCCTGTTCCCTCTGGTGTGACTAAGGAAAGACTAGACAGCTTGACTTTAGGAAT	intergenic
ASHG19A3A028591	3.7766	1.91709	3.7766	up	1857.48	6495.32	10.7312	12.6483	noncoding	ENST00000466800	RP11-120B7.1	Ensembl	359	chr5	+	107929309	107929668		ATTCACCGAATTCGAATCACCCTAAGAGCCGCAGTGTAAAATCCCTAGAAAAGGTGTGTG	intergenic
ASHG19A3A048533	13.5404	3.7592	13.5404	up	58.9097	697.237	5.7656	9.52481	noncoding	AF116620		misc_RNA	2270	chr12	+	46752133	46754394		TAAATAGCCAGAGGATTGGAGGAGCTTCCTCACATTAATTTGCTGTAGAGAAAAGAATTT	natural antisense	NM_018976	SLC38A2	sodium-coupled neutral amino acid transporter 2	-	46751970	46766645
ASHG19A3A015356	3.41883	1.7735	3.41883	up	986.199	3009.43	9.80919	11.5827	noncoding	ENST00000434820	AC092843.1	Ensembl	1327	chr2	+	17566357	17567684		ATATAAAGAAATGTTCTTTATAAGAAACAGGAAGGCACCCCTGAGGGGCTCTATCTCTAG	intergenic
ASHG19A3A038007	2.16372	1.11352	2.16372	up	190.92	374.275	7.46603	8.57954	noncoding	uc004bmy.2	BC010186	UCSC_knowngene	1199	chr9	-	125578332	125579531		CGTTTGGAATGAAAGTCTCAGGAAGGCACGGACTTTGTTTTCTTCCTCATGTATGGCATA	intergenic
ASHG19A3A036508	2.21387	1.14657	2.21387	up	4270.6	9419.09	11.9744	13.121	noncoding	HIT000301757		H-invDB	1646	chr8	+	30209389	30211034	NR_003598,NM_178014,ENST00000454403,	AACAGCAGCTACTTTGTGGAATGGATCCCCAACAATATCAAGACAGCTGTCTGTGACATC	intergenic
ASHG19A3A020049	2.49848	1.32105	2.49848	up	235.368	518.965	7.74742	9.06847	noncoding	CR598503		misc_RNA	1594	chr1	+	36321682	36323276		GCAGGGATATTTTGTGTTTATGTGTCCAAAAAAGGAATAAATTGGCATTCTTGTGCCAAA	exon sense-overlapping	NM_017629	EIF2C4	protein argonaute-4	+	36273827	36323490
ASHG19A3A009498	2.75558	1.46236	2.75558	up	47.5275	128.829	5.46139	6.92375	noncoding	ENST00000499202	AC073508.1	Ensembl	1281	chr17	+	38804773	38806823		CGTGGACAGGCAGCTTGAGTGGTGCTTGAGAAAATGTACATGAAATTGCTTGTTAAAAAA	bidirectional	NM_003079	SMARCE1	SWI/SNF-related matrix-associated	-	38783975	38804103
ASHG19A3A035086	2.17216	1.11913	2.17216	up	304.599	583.543	8.12763	9.24677	noncoding	ENST00000447612	AC008264.4	Ensembl	367	chr7	+	131204895	131205262		TTGGTTACCCACGTGCCTGTTATCACTTTCAAAAATCTATAGACAGTCAGTGTGGATGAG	intronic antisense	NM_005397	PODXL	podocalyxin isoform 2 precursor	-	131185020	131241376
ASHG19A3A035086	2.17216	1.11913	2.17216	up	304.599	583.543	8.12763	9.24677	noncoding	ENST00000447612	AC008264.4	Ensembl	367	chr7	+	131204895	131205262		TTGGTTACCCACGTGCCTGTTATCACTTTCAAAAATCTATAGACAGTCAGTGTGGATGAG	intronic antisense	NM_001018111	PODXL	podocalyxin isoform 1 precursor	-	131185020	131241376
ASHG19A3A048936	2.33308	1.22224	2.33308	up	960.571	1941.04	9.77134	10.9936	noncoding	ENST00000403137	AC008128.1	Ensembl	753	chr12	+	96066080	96066844	NM_002629,NM_001029891,ENST00000397343,ENST00000334645,	ACTGCTGCAAAGCATGGTGAGGCCCAGGTGAAGATCTGGAGGTGCTCCTATGATGTCCCA	intronic antisense	NM_021229	NTN4	netrin-4 precursor	-	96051582	96184536
ASHG19A3A030487	7.98234	2.99681	7.98234	up	85.5958	606.652	6.31298	9.30979	noncoding	ENST00000402383	RP11-162L10.1	Ensembl	1300	chr6	-	126923497	126924797		AAACTGGGAGATGGACAGGTTATCAATGAACCTTCTCAGCCTCATGATTAGCTTGATGAA	intergenic
ASHG19A3A010930	2.57454	1.36432	2.57454	up	6900.91	20802.2	12.6613	14.0256	noncoding	uc002mej.1	AK056073	UCSC_knowngene	2376	chr19	-	6189738	6199540		AGACCACCAGCCTGGACAACATGGCAAAACACCATCTCTACAAAACAAAAAGAGGATAGC	natural antisense	NM_030924	ACSBG2	long-chain-fatty-acid--CoA ligase ACSBG2	+	6135709	6193112
ASHG19A3A007179	2.31137	1.20875	2.31137	up	914.379	1843.6	9.706	10.9147	noncoding	NR_015368	LOC643837	RefSeq_NR	1543	chr1	+	763063	789740		ACTGATGAACCCCGACCCTGATGAACATGACCGCCGTGTGGTAAACTGATGAACCCCGAC	intergenic
ASHG19A3A013393	2.11051	1.07759	2.11051	up	9583.68	24939.4	13.1812	14.2588	noncoding	ENST00000439053	RP11-214J9.1	Ensembl	820	chr2	-	26324185	26325005		TTCAATGAGTCTCCCTATCAGGAATTCACTGACCATCTTGTAAGACCCATACCGGAGTCT	intronic antisense	NM_016131	RAB10	ras-related protein Rab-10	+	26256728	26360323
CUST_747_PI426073487	2.90285	1.53747	2.90285	up	782.472	1972.05	9.47923	11.0167	noncoding	uc.268-	uc.268	UCR	251	chr9	-	125606827	125607078	uc004bnb.1,	GTGTTTGAGAGAAAATTGATGGAAAAAGTTTGCAGTACTTGACATGTATTTGCATGCACA	intergenic
ASHG19A3A037872	2.65924	1.41101	2.65924	up	303.881	701.516	8.12436	9.53538	noncoding	AK022164		NRED	1893	chr9	-	111805143	111807028		AAAGTAACCGAACCAAAACTTGCATATGCACAGCACATAACAGTGGTTGGCACGTAGTGG	intron sense-overlapping	NM_032012	C9orf5	transmembrane protein C9orf5	-	111777414	111882225
ASHG19A3A031219	2.5345	1.3417	2.5345	up	309.717	682.449	8.15164	9.49334	noncoding	NR_001434	HLA-H	RefSeq_NR	1839	chr6	+	29855382	29858856		CAGATATGAATTTGTTCATGAATATTTTTTCTATAGTGTGAGACAGCTGCCTTGTGTGGG	intergenic
ASHG19A3A027860	3.65069	1.86817	3.65069	up	136.164	450.028	6.97891	8.84708	noncoding	ENST00000509920	CTD-2012J19.2	Ensembl	121	chr5	+	1598241	1598362	NM_145265,	TGGTGATGGAAGCAGGTGGAATTATGCCCTGTTGGTTCCAATGCTGGGATTGGCTGCTTT	intergenic
ASHG19A3A049917	3.11729	1.64029	3.11729	up	97.3251	278.972	6.49235	8.13264	noncoding	ENST00000422510	RP11-569O4.8	Ensembl	632	chr13	+	21579295	21592261		ACCTTAGGAGGAAAAAGGTCTTCATAAAGGAAAGGAAAACCTGTAATCCCAGTGCTTTGG	intronic antisense	NM_014572	LATS2	serine/threonine-protein kinase LATS2	-	21547175	21635722
ASHG19A3A016495	7.67858	2.94084	7.67858	up	160.309	1068.52	7.21411	10.1549	noncoding	AK022198		NRED	1905	chr2	+	158168818	158170723		GAGGCTGTGTTACAGGAGCTACAGATTTTTCCCTGGATTAGCTTAGGTCATTGCCTTTAC	intergenic
ASHG19A3A040282	2.80321	1.48708	2.80321	up	1349.07	3384.77	10.2546	11.7417	noncoding	ENST00000432307	RP11-111F16.1	Ensembl	1813	chrX	-	110862904	110864717	NM_001417,ENST00000432132,	GCAACTATGCTGCTCTCTCTTGATGGTGAAGATGAAAATGAGGGAGAAGATTATGCCGAA	intergenic
ASHG19A3A018323	3.65506	1.8699	3.65506	up	2398.92	8258.82	11.0994	12.9693	noncoding	ENST00000439970	RPL12P11	Ensembl	501	chr20	+	40176060	40176561		ACCAATCTTTAGCCAGAGAACTCTCTGGAACTATTAAAGAGCTCCTGGGGACTGACTACT	intronic antisense	NM_032221	CHD6	chromodomain-helicase-DNA-binding protein 6	-	40031169	40247133
ASHG19A3A050028	2.95347	1.56241	2.95347	up	1276.9	3406.61	10.1853	11.7477	noncoding	uc001utu.2	EEF1DP3	UCSC_knowngene	1367	chr13	+	32420919	32527609	ENST00000428783,	ATCACCAAGTTTGAAGAGTGTATGCAGAGTGTCGACATCGCAGCTTTCAACAAGATCTGG	intergenic
ASHG19A3A033225	3.8554	1.94688	3.8554	up	1415.14	5034.32	10.3303	12.2772	noncoding	ENST00000415679	RP11-226L15.1	Ensembl	426	chr1	+	159990089	159990515		TTGACAAATTGTGGGCTTTGGTCAGGAAGCAGACACAGGTGAATGCTGCTAAAAACAAGC	intergenic
ASHG19A3A017755	2.55946	1.35584	2.55946	up	247.637	557.773	7.82206	9.1779	noncoding	ENST00000400363	RP5-890O15.3	Ensembl	863	chr20	-	45789476	45790339		ATTCAGGAATTCAGGTCAGGAATTCACTGACTACCTTGTCAAGACCCCATCAGAGTCTCT	intronic antisense	NM_172110	EYA2	eyes absent homolog 2 isoform c	+	45523262	45817492
ASHG19A3A017755	2.55946	1.35584	2.55946	up	247.637	557.773	7.82206	9.1779	noncoding	ENST00000400363	RP5-890O15.3	Ensembl	863	chr20	-	45789476	45790339		ATTCAGGAATTCAGGTCAGGAATTCACTGACTACCTTGTCAAGACCCCATCAGAGTCTCT	intronic antisense	NM_005244	EYA2	eyes absent homolog 2 isoform a	+	45523262	45817492
ASHG19A3A014029	6.1857	2.62894	6.1857	up	172.647	929.621	7.32418	9.95312	noncoding	ENST00000512705	AC009238.6	Ensembl	217	chr2	-	96079203	96080044	NM_207328,	CTTTTGCCAGCCTGGACAATCAGGAAAAACTAGAACAGTTCATCCGGCAGTTCACTTGTA	intergenic
ASHG19A3A035421	2.3689	1.24422	2.3689	up	242.963	508.572	7.79162	9.03584	noncoding	uc003wns.2	BC034557	UCSC_knowngene	4298	chr7	+	157647276	157658780		ACTCTCCTGCTTTAGAACAAGGACCTTTCCCTTTTGTGCATGAATACGCTCTCAGCAGAT	intronic antisense	NM_002847	PTPRN2	receptor-type tyrosine-protein phosphatase N2	-	157331749	158380482
ASHG19A3A035421	2.3689	1.24422	2.3689	up	242.963	508.572	7.79162	9.03584	noncoding	uc003wns.2	BC034557	UCSC_knowngene	4298	chr7	+	157647276	157658780		ACTCTCCTGCTTTAGAACAAGGACCTTTCCCTTTTGTGCATGAATACGCTCTCAGCAGAT	intronic antisense	NM_130843	PTPRN2	receptor-type tyrosine-protein phosphatase N2	-	157331749	158380482
ASHG19A3A035421	2.3689	1.24422	2.3689	up	242.963	508.572	7.79162	9.03584	noncoding	uc003wns.2	BC034557	UCSC_knowngene	4298	chr7	+	157647276	157658780		ACTCTCCTGCTTTAGAACAAGGACCTTTCCCTTTTGTGCATGAATACGCTCTCAGCAGAT	intronic antisense	NM_130842	PTPRN2	receptor-type tyrosine-protein phosphatase N2	-	157331749	158380482
ASHG19A3A039818	2.32838	1.21933	2.32838	up	180.448	379.531	7.38394	8.60327	noncoding	ENST00000423238	RP3-393P12.3	Ensembl	740	chrX	-	47700361	47701101		TCATTCATGAAATTGCCTTCCCAGGGAAACATTTCGAGGAGATCTCATGGTTCTTGAGCC	intronic antisense	NM_007137	ZNF81	zinc finger protein 81	+	47696300	47781655
ASHG19A3A029749	2.10939	1.07682	2.10939	up	7509.27	18260.8	12.7952	13.8721	noncoding	ENST00000449413	HLA-DRB9	Ensembl	343	chr6	-	32427597	32441277		TTGGACACCTACTGCAGACACAACTACGGGGTTTTTGAGAGCTTCTCCATGCACAGGCGA	intergenic
ASHG19A3A026753	6.75675	2.75633	6.75675	up	1415.65	9124.95	10.3307	13.087	noncoding	ENST00000501221	RP11-447H19.1	Ensembl	1362	chr5	-	43231913	43233275		ACCAAGTGTATCATCTAATTTGTGGTTTGGTGCCCCCTGGCTTCAAGGTTGGCATTAACT	intronic antisense	NM_153361	NIM1	serine/threonine-protein kinase NIM1	+	43192326	43280952
ASHG19A3A042581	4.82041	2.26916	4.82041	up	73.714	324.925	6.0932	8.36236	noncoding	ENST00000396326	RP11-449I17.7	Ensembl	963	chr10	-	30806544	30807790		GAAGTGATTGAAATCATGACTGAAACGAGGCAGCAGCAAGAAAAGGGGCTTTGTCTTTGT	intergenic
ASHG19A3A034881	2.10573	1.07432	2.10573	up	414.393	750.724	8.56006	9.63438	noncoding	ENST00000442083	CTA-351J1.1	Ensembl	610	chr7	+	105459937	105460547		GTGGAGAAGAAAACTGACAAATACACAGAAGCTCTCAAGACCCATGGACTCCTGATCTGA	intronic antisense	NM_152749	ATXN7L1	ataxin-7-like protein 1 isoform 2	-	105400635	105517031
ASHG19A3A034881	2.10573	1.07432	2.10573	up	414.393	750.724	8.56006	9.63438	noncoding	ENST00000442083	CTA-351J1.1	Ensembl	610	chr7	+	105459937	105460547		GTGGAGAAGAAAACTGACAAATACACAGAAGCTCTCAAGACCCATGGACTCCTGATCTGA	intronic antisense	NM_020725	ATXN7L1	ataxin-7-like protein 1 isoform 1	-	105245220	105517031
ASHG19A3A042410	5.08434	2.34606	5.08434	up	273.66	1200.83	7.96962	10.3157	noncoding	AK057130		misc_RNA	3156	chr10	-	7200571	7203727		GACGAAGGGCATGCTTTTGGTTTGCTGTAAGATTGTATTCTGTATATATGTTTTCATGTA	exon sense-overlapping	NM_001018039	SFMBT2	scm-like with four MBT domains protein 2	-	7200585	7451303
ASHG19A3A042410	5.08434	2.34606	5.08434	up	273.66	1200.83	7.96962	10.3157	noncoding	AK057130		misc_RNA	3156	chr10	-	7200571	7203727		GACGAAGGGCATGCTTTTGGTTTGCTGTAAGATTGTATTCTGTATATATGTTTTCATGTA	exon sense-overlapping	NM_001029880	SFMBT2	scm-like with four MBT domains protein 2	-	7200585	7453448
ASHG19A3A046983	3.68335	1.88102	3.68335	up	51.8349	181.597	5.58578	7.46679	noncoding	ENST00000444200	AP006216.12	Ensembl	563	chr11	+	116706832	116726445		TGAAGAAAAACATTTCAGGAAGTATTGAAAGTACACGGTAACTCAGCCTGGGGCAGGGGT	natural antisense	NM_000039	APOA1	apolipoprotein A-I preproprotein	-	116706468	116708338
ASHG19A3A046983	3.68335	1.88102	3.68335	up	51.8349	181.597	5.58578	7.46679	noncoding	ENST00000444200	AP006216.12	Ensembl	563	chr11	+	116706832	116726445		TGAAGAAAAACATTTCAGGAAGTATTGAAAGTACACGGTAACTCAGCCTGGGGCAGGGGT	intronic antisense	NM_025164	SIK3	serine/threonine-protein kinase SIK3	-	116714117	116968993
ASHG19A3A018171	2.06653	1.04721	2.06653	up	3079.11	5962	11.481	12.5282	noncoding	NR_003579	FRG1B	RefSeq_NR	978	chr20	+	29611878	29634007		GCCGACAGATACTGCAAATGACTGGAATTTTTGTTTCTGCCTTATCTTTTTGTGTTTTTT	intergenic
ASHG19A3A053625	2.44895	1.29216	2.44895	up	153.018	342.211	7.14966	8.44183	noncoding	ENST00000469929	RP11-1348G14.1	Ensembl	694	chr16	-	28825300	28825994		CTAAACGTGGGATCAGCCCCAGATTTGATGTGCAAAGATCTAGAAAAATAGCAGAATGAT	intergenic
ASHG19A3A007474	2.54786	1.34929	2.54786	up	223.502	506.77	7.67945	9.02874	noncoding	NR_027121	SHROOM4	RefSeq_NR	6018	chrX	-	50334642	50557044		ATCAGCCTGAATCCACCGTGGCTAGGCATATTCTTGCTCTTCTCGTGTTGCTCACAACTA	exon sense-overlapping	NM_020717	SHROOM4	protein Shroom4	-	50334642	50557044
ASHG19A3A053894	2.42705	1.2792	2.42705	up	3999.74	9743.94	11.8783	13.1575	noncoding	ENST00000494583	RP11-529K1.1	Ensembl	239	chr16	-	70478576	70478815		ATGCTCAGACAGTGGTTCTTTGTGTGGGTTGTTCAACAGTATCAGCCTACAGAAGGAAAG	intergenic
ASHG19A3A017599	2.44466	1.28963	2.44466	up	109.071	247.051	6.65933	7.94896	noncoding	ENST00000433764	RP4-614O4.5	Ensembl	569	chr20	-	33805627	33865928		TCTATGACAACGTCTCTCTGCCGTGAATCATTCCTGCAGATGAAAAAGTGTGACTTGGCA	intronic antisense	NM_006690	MMP24	matrix metalloproteinase-24 preproprotein	+	33814538	33864804
ASHG19A3A042595	2.51032	1.32787	2.51032	up	16958.9	66280.7	14.1002	15.4281	noncoding	ENST00000446897	RP11-241I20.3	Ensembl	772	chr10	-	32391449	32392221	NM_001007,	TGAAAGATGCCAATGGCAACAGCTTTGCCGCTCGACTTTCCAACATTTTTGTTATTGGCA	intergenic
ASHG19A3A024433	2.0309	1.02212	2.0309	up	1442.71	2609.97	10.3675	11.3896	noncoding	ENST00000445131	RP5-1017O19.1	Ensembl	604	chr1	+	72740234	72740838		AGGAAATCAGACCAGCTTTGGAGCTCTTGGAACCAACTGAGCAGAAATTTGTTAGCACCA	intronic antisense	NM_173808	NEGR1	neuronal growth regulator 1 precursor	-	71868624	72748277
ASHG19A3A034836	6.60101	2.72269	6.60101	up	245.811	1419.01	7.80951	10.5322	noncoding	AK022020		NRED	2139	chr7	+	100737327	100739469		ATAGAAAGCCCTGCTCAGGACTAAGGCAGAGTTCCCAGTTATATCGCAGATACAAAGAGA	intergenic
ASHG19A3A031132	3.5295	1.81946	3.5295	up	808.987	2534.23	9.53138	11.3508	noncoding	CR590573		misc_RNA	1570	chr6	+	26686468	26688038		ATTTAAAGATTTATCATGGGTCTTGATGACATGATGGAATCTCTCTACTCTCTGGACTTA	intergenic
ASHG19A3A013347	2.33063	1.22072	2.33063	up	76.4447	170.001	6.14665	7.36737	noncoding	ENST00000449391	AC012065.6	Ensembl	600	chr2	-	20790534	20792308		ATCAGTTTCCTCTAATGCCAAGTGGAGACAATAAATTGCCCTTTCCAGGGTCCCAACAAG	intergenic
ASHG19A3A025374	2.16302	1.11305	2.16302	up	3797.71	7985.79	11.7994	12.9125	noncoding	uc003gsd.2	pKBF-2	UCSC_knowngene	1927	chr4	+	26434614	26436541		CTCAGTTCCATATTTCATCCGTGAAAAACTTGCAATACGAGCAGTTTCAAGGAATAAATA	intergenic
ASHG19A3A027193	2.32095	1.21472	2.32095	up	41.6799	96.3931	5.26981	6.48453	noncoding	ENST00000503367	CTD-2193G5.1	Ensembl	432	chr5	-	102865376	102877686		TTAAAATCTTCTAAAGCAAGGGACGCACACCACTGCTGGAATGCACAATGGTTTGGAGTG	intergenic
ASHG19A3A026906	2.44179	1.28794	2.44179	up	119.907	270.114	6.79559	8.08352	noncoding	ENST00000505635	RP11-98J23.1	Ensembl	4332	chr5	-	69194693	69199025	ENST00000507312,ENST00000505001,ENST00000505001,ENST00000505001,ENST00000504077,ENST00000504077,ENST00000504077,ENST00000504059,ENST00000502532,ENST00000502532,ENST00000502532,ENST00000502466,ENST00000502466,ENST00000502466,ENST00000502466,ENST00000456583,ENST00000442958,ENST00000425725,ENST00000406100,	TTCTAAAGCACCCACTATGGATGCACAGCAGGACAGACCCAAGTCCCAAGACTGCCTGGG	intergenic
ASHG19A3A030746	2.69758	1.43167	2.69758	up	90.9673	228.472	6.40008	7.83174	noncoding	ENST00000344851	RP1-274L14.2	Ensembl	1979	chr6	-	158658367	158663829		TTATTTCTGCTTACTCACTTGCAGATCCAGAGAAAGGCACAGCTCTTAGTAAACATTTGC	intergenic
ASHG19A3A049269	2.21286	1.14591	2.21286	up	1677.83	3349.03	10.5773	11.7232	noncoding	ENST00000458378	RP11-264J4.4	Ensembl	485	chr13	-	20753116	20753601		TTTGATGGTGAGAACTTCATCCTGAAGCATTCAGGTCCTGGCATCTTGTGCATGGCAAAT	intergenic
ASHG19A3A033056	2.81058	1.49087	2.81058	up	338.503	825.808	8.28024	9.77111	noncoding	NR_003262	FDPSL2A	RefSeq_NR	4981	chr7	-	76099337	76104317		GAGACTGCAAGGGCGGGGAGAGAAGGCTCTCAATAAGTAAATTATTGTGTAAAATAAATA	intronic antisense	NM_001102595	DTX2	protein deltex-2 isoform a	+	76090971	76135312
ASHG19A3A033056	2.81058	1.49087	2.81058	up	338.503	825.808	8.28024	9.77111	noncoding	NR_003262	FDPSL2A	RefSeq_NR	4981	chr7	-	76099337	76104317		GAGACTGCAAGGGCGGGGAGAGAAGGCTCTCAATAAGTAAATTATTGTGTAAAATAAATA	natural antisense	NM_020892	DTX2	protein deltex-2 isoform a	+	76090971	76135312
ASHG19A3A033056	2.81058	1.49087	2.81058	up	338.503	825.808	8.28024	9.77111	noncoding	NR_003262	FDPSL2A	RefSeq_NR	4981	chr7	-	76099337	76104317		GAGACTGCAAGGGCGGGGAGAGAAGGCTCTCAATAAGTAAATTATTGTGTAAAATAAATA	intronic antisense	NM_001102594	DTX2	protein deltex-2 isoform a	+	76090971	76135312
ASHG19A3A000121	2.80939	1.49025	2.80939	up	136.822	349.828	6.98643	8.47669	noncoding	ENST00000417554	RP11-495P10.2	Ensembl	213	chr1	-	147930761	147931881	uc009wlc.2,uc001ekv.2,	AGAGCTGAGGACTGCCTGTTTGCAGATTTCAGATACTCAGACTCCACCTTTACTTTTACC	intergenic
ASHG19A3A042909	2.74569	1.45717	2.74569	up	3404.79	9155.77	11.6358	13.093	noncoding	ENST00000435591	RP11-367H5.8	Ensembl	252	chr10	-	71958743	71958995		ATAAGCTTATGACCCCAGCTGTGATCTCTGAGAAACTGAAGATTTGAGGTTCCTTGGCCA	intergenic
ASHG19A3A012707	3.76401	1.91227	3.76401	up	4226.05	18233	11.9573	13.8695	noncoding	ENST00000496996	CTD-2356P16.1	Ensembl	306	chr19	+	41675765	41676071		CCTCAAGTTCATCAAGAAAAGGATGGGGACGCACATCCGCACCAAGAGGAAGCGGAAGGA	intergenic
ASHG19A3A022386	2.57502	1.36458	2.57502	up	524.282	1163.68	8.90551	10.2701	noncoding	ENST00000368528	AC098614.2	Ensembl	745	chr3	+	27674466	27675211	NM_003290,NM_001145160,	AATTAAACTTCTGTGTGACAAACTGAAAGAGGCTGAGACCCGTGCTGAATTTGCAGAGAG	intergenic
ASHG19A3A025872	2.14793	1.10295	2.14793	up	1418.49	2697.61	10.3347	11.4377	noncoding	uc001bep.1	AK098438	UCSC_knowngene	2057	chr1	-	21749600	21754300		ATATCAATACTTAGGAAGACCACAGCTAGATGGACAAACAGCATTGAGAGGCCTTAGCCC	intergenic
ASHG19A3A029634	2.03245	1.02322	2.03245	up	707.686	1240.15	9.33316	10.3564	noncoding	NR_002139	HCG4	RefSeq_NR	2083	chr6	-	29758808	29760850		AGGCCAACTGCAAAGATCACCCTGCAAGGCTCTGTAGATTGATGTATTAAAATATATAAA	intergenic
ASHG19A3A022172	3.32554	1.73359	3.32554	up	2283.92	7091.26	11.038	12.7715	noncoding	ENST00000452862	AC144530.1	Ensembl	555	chr3	-	197577270	197577825	NM_001035006,NM_000985,ENST00000504072,ENST00000467688,ENST00000422360,ENST00000420302,ENST00000414070,ENST00000401798,ENST00000395729,ENST00000391360,	TTGCCCAGAAGAAAAAGATATCCCAGAAGAAACTGAAGAAACAAAAACTTACGGCACGGG	intronic antisense	NM_032773	LRCH3	leucine-rich repeat and calponin homology	+	197518144	197598456
ASHG19A3A038893	2.17513	1.1211	2.17513	up	12688.4	37725.5	13.6009	14.722	noncoding	ENST00000435599	RPS10P3	Ensembl	498	chr9	+	90631211	90631711	NM_001014,ENST00000492704,ENST00000393266,	TATCTTACCAATGAGGGTATCCAGTATCTCCGTGATTACCTTCATCTGCCCCCAGAGATT	intergenic
ASHG19A3A055234	2.78267	1.47647	2.78267	up	130.026	330.75	6.91347	8.38994	noncoding	uc003ttc.1	AK125429	UCSC_knowngene	4369	chr7	+	64035072	64078967		TTGGTGGTCCCAGCTTCAAAGAAATACTTGTCTGCAGCGCAGATTGCTACATATTGCTTG	intergenic
ASHG19A3A050818	15.7976	3.98163	15.7976	up	68.3431	934.258	5.98051	9.96214	noncoding	ENST00000422129	BX571672.2	Ensembl	697	chr1	-	143118703	143194342	ENST00000513357,ENST00000451663,ENST00000428211,	CGTAAGAATTCCTACTTCAAACCTCAGACTTCAAATAACTGCCAGAACTACTTGACTGAG	intergenic
ASHG19A3A054733	2.2764	1.18676	2.2764	up	1063.43	2131.68	9.92958	11.1163	noncoding	CR607695		misc_RNA	1920	chr16	+	68261128	68263047		GAACTGGTTCTCAGTTATGTTTACAGCACTTGGAATTGTGTGTTCTTGTACATTTTGTAT	natural antisense	NM_024939	ESRP2	epithelial splicing regulatory protein 2	-	68262449	68270136
ASHG19A3A054733	2.2764	1.18676	2.2764	up	1063.43	2131.68	9.92958	11.1163	noncoding	CR607695		misc_RNA	1920	chr16	+	68261128	68263047		GAACTGGTTCTCAGTTATGTTTACAGCACTTGGAATTGTGTGTTCTTGTACATTTTGTAT	exon sense-overlapping	NM_173163	NFATC3	"nuclear factor of activated T-cells, cytoplasmic"	+	68119268	68263162
ASHG19A3A054733	2.2764	1.18676	2.2764	up	1063.43	2131.68	9.92958	11.1163	noncoding	CR607695		misc_RNA	1920	chr16	+	68261128	68263047		GAACTGGTTCTCAGTTATGTTTACAGCACTTGGAATTGTGTGTTCTTGTACATTTTGTAT	exon sense-overlapping	NM_004555	NFATC3	"nuclear factor of activated T-cells, cytoplasmic"	+	68119268	68263162
ASHG19A3A054733	2.2764	1.18676	2.2764	up	1063.43	2131.68	9.92958	11.1163	noncoding	CR607695		misc_RNA	1920	chr16	+	68261128	68263047		GAACTGGTTCTCAGTTATGTTTACAGCACTTGGAATTGTGTGTTCTTGTACATTTTGTAT	exon sense-overlapping	NM_173165	NFATC3	"nuclear factor of activated T-cells, cytoplasmic"	+	68119268	68263162
ASHG19A3A015125	2.25098	1.17055	2.25098	up	4360.03	9989.26	12.0168	13.1874	noncoding	ENST00000392022	AC064852.5	Ensembl	672	chr2	-	233594232	233594908		CCACAATATGAATCGAAGAAAGCCAAAAAACCTGCACTCGTTGCCAAGTCTTCCATCTTA	intronic antisense	NM_001103148	GIGYF2	PERQ amino acid-rich with GYF domain-containing	+	233562014	233725289
ASHG19A3A015125	2.25098	1.17055	2.25098	up	4360.03	9989.26	12.0168	13.1874	noncoding	ENST00000392022	AC064852.5	Ensembl	672	chr2	-	233594232	233594908		CCACAATATGAATCGAAGAAAGCCAAAAAACCTGCACTCGTTGCCAAGTCTTCCATCTTA	intronic antisense	NM_001103147	GIGYF2	PERQ amino acid-rich with GYF domain-containing	+	233562014	233725289
ASHG19A3A015125	2.25098	1.17055	2.25098	up	4360.03	9989.26	12.0168	13.1874	noncoding	ENST00000392022	AC064852.5	Ensembl	672	chr2	-	233594232	233594908		CCACAATATGAATCGAAGAAAGCCAAAAAACCTGCACTCGTTGCCAAGTCTTCCATCTTA	intronic antisense	NM_001103146	GIGYF2	PERQ amino acid-rich with GYF domain-containing	+	233562014	233725289
ASHG19A3A015125	2.25098	1.17055	2.25098	up	4360.03	9989.26	12.0168	13.1874	noncoding	ENST00000392022	AC064852.5	Ensembl	672	chr2	-	233594232	233594908		CCACAATATGAATCGAAGAAAGCCAAAAAACCTGCACTCGTTGCCAAGTCTTCCATCTTA	intronic antisense	NM_015575	GIGYF2	PERQ amino acid-rich with GYF domain-containing	+	233562014	233725289
ASHG19A3A020034	3.28163	1.71441	3.28163	up	239.653	679.567	7.77195	9.48636	noncoding	ENST00000427470	AC006548.19	Ensembl	102	chr22	+	17378334	17378436	NM_005467,ENST00000427864,	GAGAATGTTACAAATATTGTGCCACCATATAATGCTTTCTCAGCCCAAGGCATGCCAGAG	intergenic
ASHG19A3A030379	2.77928	1.47471	2.77928	up	168.683	423.194	7.28658	8.76129	noncoding	ENST00000405355	RP11-346C16.4	Ensembl	441	chr6	-	110883377	110883818		TGAGATGAGAAGTGGTTCTACACATGAGCTGCTTCCACAACATAGCACCTATACCACCAA	intergenic
ASHG19A3A019684	2.74779	1.45827	2.74779	up	1472.95	3669.35	10.398	11.8563	noncoding	ENST00000510957	CTA-963H5.5	Ensembl	612	chr22	-	31049863	31050801		GTGGAGAAGGAAACTGACAAATACTGGGGTGTCCTCAAGACCCATGGACTCCTGCTGTGA	intergenic
ASHG19A3A026359	2.38978	1.25688	2.38978	up	266.079	558.804	7.92479	9.18166	noncoding	ENST00000425785	RP11-145D11.2	Ensembl	1258	chr1	+	98011256	98012514	NM_007214,	AAGGCAAACAATGGCTGAAGTATTTGAAAAGGAGCAGTCCTTCTGTGCTGCAGAGGAACA	intronic antisense	NM_000110	DPYD	dihydropyrimidine dehydrogenase [NADP+] isoform	-	97543299	98386615
ASHG19A3A038698	2.20137	1.1384	2.20137	up	1110.62	2152.75	9.98552	11.1239	noncoding	uc004aeg.3	BC000869	UCSC_knowngene	1478	chr9	+	66553275	66555592	NR_015363,ENST00000450704,	ATTAAATGCTGTTTTCCATGACCGTCTCTGTTCTTCCCATACGCGAATGGCAGGCATTCA	intergenic
ASHG19A3A014856	3.02349	1.59622	3.02349	up	500.099	1307.8	8.83501	10.4312	noncoding	ENST00000424739	AC007283.4	Ensembl	197	chr2	-	202027206	202027403		TTCAATGCAGCAGATACCTTCAGAGAAAGAGAAGGCAGAGAAACTGAAGCAGTCCTTGTC	intronic antisense	NM_001202519	CFLAR	CASP8 and FADD-like apoptosis regulator isoform	+	201980876	202037411
ASHG19A3A014856	3.02349	1.59622	3.02349	up	500.099	1307.8	8.83501	10.4312	noncoding	ENST00000424739	AC007283.4	Ensembl	197	chr2	-	202027206	202027403		TTCAATGCAGCAGATACCTTCAGAGAAAGAGAAGGCAGAGAAACTGAAGCAGTCCTTGTC	intronic antisense	NM_001202516	CFLAR	CASP8 and FADD-like apoptosis regulator isoform	+	201980876	202037411
ASHG19A3A014856	3.02349	1.59622	3.02349	up	500.099	1307.8	8.83501	10.4312	noncoding	ENST00000424739	AC007283.4	Ensembl	197	chr2	-	202027206	202027403		TTCAATGCAGCAGATACCTTCAGAGAAAGAGAAGGCAGAGAAACTGAAGCAGTCCTTGTC	intronic antisense	NM_001202517	CFLAR	CASP8 and FADD-like apoptosis regulator isoform	+	201980876	202037411
ASHG19A3A014856	3.02349	1.59622	3.02349	up	500.099	1307.8	8.83501	10.4312	noncoding	ENST00000424739	AC007283.4	Ensembl	197	chr2	-	202027206	202027403		TTCAATGCAGCAGATACCTTCAGAGAAAGAGAAGGCAGAGAAACTGAAGCAGTCCTTGTC	intronic antisense	NM_001202515	CFLAR	CASP8 and FADD-like apoptosis regulator isoform	+	202004997	202037411
ASHG19A3A014856	3.02349	1.59622	3.02349	up	500.099	1307.8	8.83501	10.4312	noncoding	ENST00000424739	AC007283.4	Ensembl	197	chr2	-	202027206	202027403		TTCAATGCAGCAGATACCTTCAGAGAAAGAGAAGGCAGAGAAACTGAAGCAGTCCTTGTC	intronic antisense	NM_001202518	CFLAR	CASP8 and FADD-like apoptosis regulator isoform	+	201997687	202037411
ASHG19A3A014856	3.02349	1.59622	3.02349	up	500.099	1307.8	8.83501	10.4312	noncoding	ENST00000424739	AC007283.4	Ensembl	197	chr2	-	202027206	202027403		TTCAATGCAGCAGATACCTTCAGAGAAAGAGAAGGCAGAGAAACTGAAGCAGTCCTTGTC	intronic antisense	NM_001127183	CFLAR	CASP8 and FADD-like apoptosis regulator isoform	+	201983268	202037411
ASHG19A3A014856	3.02349	1.59622	3.02349	up	500.099	1307.8	8.83501	10.4312	noncoding	ENST00000424739	AC007283.4	Ensembl	197	chr2	-	202027206	202027403		TTCAATGCAGCAGATACCTTCAGAGAAAGAGAAGGCAGAGAAACTGAAGCAGTCCTTGTC	intronic antisense	NM_003879	CFLAR	CASP8 and FADD-like apoptosis regulator isoform	+	201980876	202037411
ASHG19A3A037711	3.62593	1.85835	3.62593	up	66.1277	222.385	5.9316	7.78995	noncoding	ENST00000511784	AL136981.2	Ensembl	1998	chr9	-	95602165	95605801		GCAGCATTACTTTATTCCAATCTTTTGTTGCTAAAAGTCTTAAGGCATTCACCCATTTGT	intergenic
ASHG19A3A027986	2.02432	1.01744	2.02432	up	2582.95	4875.48	11.2154	12.2328	noncoding	AK130706		misc_RNA	2017	chr5	+	14701416	14703433		GCAGAATTACAAATATAAGCAATGCCAACCTTCCCTGCACCTTAGCATTACCTTTAATAG	intergenic
ASHG19A3A009251	2.03396	1.02429	2.03396	up	82.5511	161.575	6.25944	7.28373	noncoding	uc010cqz.2	AK310665	UCSC_knowngene	1233	chr17	+	20328041	20334520	uc002gty.2,NR_003554,	GGCAAAAGTGTCACTGAGAGGCAAGCTAAATGTAGTTATTTTATCCTGTTAGAATACAAA	intergenic
ASHG19A3A027024	2.25985	1.17623	2.25985	up	482.456	930.227	8.77825	9.95447	noncoding	ENST00000477681	CTD-2015H6.2	Ensembl	438	chr5	-	79794352	79794790		GCAAAATTAGACACCTTTGTCGAGAGTGCCATTCAGATGGTGCTGGAGTGTTTATGGCAA	intronic antisense	NM_205548	FAM151B	hypothetical protein LOC167555	+	79783799	79838382
ASHG19A3A052958	2.26253	1.17794	2.26253	up	569.441	1108.23	9.02636	10.2043	noncoding	AK056250		NRED	2366	chr1	-	155201062	155203428		TTAATACATCACAGTGACATTGTGTGTGTCTCTGCCACCAGACTATTGCTCCTTGATGCT	intergenic
ASHG19A3A016132	2.34736	1.23104	2.34736	up	1207.14	2511.91	10.1092	11.3402	noncoding	ENST00000448535	AC009963.5	Ensembl	339	chr2	+	108531403	108531742	ENST00000444291,	GATCACCGTGACATCCAAGGTACCTTTTTCCAAAAGGTATTTGATATATCTCACTAAAAA	intergenic
ASHG19A3A035942	2.22277	1.15236	2.22277	up	589.509	1130.11	9.07514	10.2275	noncoding	AK095472		NRED	3024	chr8	-	91634228	91637252	NM_001146273,NM_001008495,	GGGAAATCAGTAAAATGTCTTGATAATTGGTATCCAAATCACTTGTGTGCCTGAGAAAAT	exon sense-overlapping	NM_001008495	TMEM64	transmembrane protein 64 isoform 1	-	91634222	91658133
ASHG19A3A035942	2.22277	1.15236	2.22277	up	589.509	1130.11	9.07514	10.2275	noncoding	AK095472		NRED	3024	chr8	-	91634228	91637252	NM_001146273,NM_001008495,	GGGAAATCAGTAAAATGTCTTGATAATTGGTATCCAAATCACTTGTGTGCCTGAGAAAAT	exon sense-overlapping	NM_001146273	TMEM64	transmembrane protein 64 isoform 2	-	91634222	91658133
ASHG19A3A032114	2.47453	1.30715	2.47453	up	364.972	780.458	8.38377	9.69092	noncoding	ENST00000407767	RP3-406A7.3	Ensembl	334	chr6	+	136685266	136685600		GCAAAGAAAAGAGAGTCTGAGGAGTCCAAGGAGGATATGGGCTTTGGTCTTTTTGACTAA	intronic antisense	NM_003980	MAP7	ensconsin isoform 3	-	136663418	136871957
ASHG19A3A032114	2.47453	1.30715	2.47453	up	364.972	780.458	8.38377	9.69092	noncoding	ENST00000407767	RP3-406A7.3	Ensembl	334	chr6	+	136685266	136685600		GCAAAGAAAAGAGAGTCTGAGGAGTCCAAGGAGGATATGGGCTTTGGTCTTTTTGACTAA	intronic antisense	NM_001198618	MAP7	ensconsin isoform 8	-	136663418	136847744
ASHG19A3A032114	2.47453	1.30715	2.47453	up	364.972	780.458	8.38377	9.69092	noncoding	ENST00000407767	RP3-406A7.3	Ensembl	334	chr6	+	136685266	136685600		GCAAAGAAAAGAGAGTCTGAGGAGTCCAAGGAGGATATGGGCTTTGGTCTTTTTGACTAA	intronic antisense	NM_001198615	MAP7	ensconsin isoform 5	-	136663418	136788013
ASHG19A3A032114	2.47453	1.30715	2.47453	up	364.972	780.458	8.38377	9.69092	noncoding	ENST00000407767	RP3-406A7.3	Ensembl	334	chr6	+	136685266	136685600		GCAAAGAAAAGAGAGTCTGAGGAGTCCAAGGAGGATATGGGCTTTGGTCTTTTTGACTAA	intronic antisense	NM_001198608	MAP7	ensconsin isoform 1	-	136663418	136847351
ASHG19A3A032114	2.47453	1.30715	2.47453	up	364.972	780.458	8.38377	9.69092	noncoding	ENST00000407767	RP3-406A7.3	Ensembl	334	chr6	+	136685266	136685600		GCAAAGAAAAGAGAGTCTGAGGAGTCCAAGGAGGATATGGGCTTTGGTCTTTTTGACTAA	intronic antisense	NM_001198616	MAP7	ensconsin isoform 6	-	136663418	136871957
ASHG19A3A032114	2.47453	1.30715	2.47453	up	364.972	780.458	8.38377	9.69092	noncoding	ENST00000407767	RP3-406A7.3	Ensembl	334	chr6	+	136685266	136685600		GCAAAGAAAAGAGAGTCTGAGGAGTCCAAGGAGGATATGGGCTTTGGTCTTTTTGACTAA	intronic antisense	NM_001198619	MAP7	ensconsin isoform 8	-	136663418	136847848
ASHG19A3A032114	2.47453	1.30715	2.47453	up	364.972	780.458	8.38377	9.69092	noncoding	ENST00000407767	RP3-406A7.3	Ensembl	334	chr6	+	136685266	136685600		GCAAAGAAAAGAGAGTCTGAGGAGTCCAAGGAGGATATGGGCTTTGGTCTTTTTGACTAA	intronic antisense	NM_001198611	MAP7	ensconsin isoform 4	-	136663418	136847351
ASHG19A3A032114	2.47453	1.30715	2.47453	up	364.972	780.458	8.38377	9.69092	noncoding	ENST00000407767	RP3-406A7.3	Ensembl	334	chr6	+	136685266	136685600		GCAAAGAAAAGAGAGTCTGAGGAGTCCAAGGAGGATATGGGCTTTGGTCTTTTTGACTAA	intronic antisense	NM_001198617	MAP7	ensconsin isoform 7	-	136663418	136871957
ASHG19A3A032114	2.47453	1.30715	2.47453	up	364.972	780.458	8.38377	9.69092	noncoding	ENST00000407767	RP3-406A7.3	Ensembl	334	chr6	+	136685266	136685600		GCAAAGAAAAGAGAGTCTGAGGAGTCCAAGGAGGATATGGGCTTTGGTCTTTTTGACTAA	intronic antisense	NM_001198609	MAP7	ensconsin isoform 2	-	136663418	136847351
ASHG19A3A032114	2.47453	1.30715	2.47453	up	364.972	780.458	8.38377	9.69092	noncoding	ENST00000407767	RP3-406A7.3	Ensembl	334	chr6	+	136685266	136685600		GCAAAGAAAAGAGAGTCTGAGGAGTCCAAGGAGGATATGGGCTTTGGTCTTTTTGACTAA	intronic antisense	NM_001198614	MAP7	ensconsin isoform 1	-	136663418	136847744
ASHG19A3A025907	2.36837	1.2439	2.36837	up	10062.4	31081.2	13.2579	14.5018	noncoding	ENST00000491760	RP11-255I10.1	Ensembl	320	chr4	+	112473009	112473329		TGCAAGTATTTTGAACTGGGAGGAGATAAGGAGAGAAAGGGCCAAGTAATCCAGTTCTGC	intergenic
ASHG19A3A018480	3.3143	1.72871	3.3143	up	671.403	1932.24	9.25916	10.9879	noncoding	ENST00000398541	RPS4L	Ensembl	413	chr20	+	55176756	55177169	ENST00000402039,	GGAGGCCAAGTACAAGTTTGTGCAAACTGAGAAAAATCTTTGTGGGCACAAAAGGAATCC	intergenic
ASHG19A3A032652	2.57425	1.36415	2.57425	up	160.233	373.717	7.2131	8.57725	noncoding	ENST00000450133	RP9P	Ensembl	1212	chr7	-	32956426	32982650		AATGAATACGCCAGAGAATTTCTGGCTCATGCACCAACTAAAGGACTTTGGTTGCCACTG	intergenic
ASHG19A3A047759	4.32315	2.11208	4.32315	up	833.833	3245.62	9.57143	11.6835	noncoding	ENST00000493820	RP11-274J7.1	Ensembl	303	chr12	-	64265521	64265824		AGATGCAAGCATTTTGAACTGGGAGGATATAAGAAAAGAAAGGACCAAGTGATCCAGTTC	intronic antisense	NM_020762	SRGAP1	SLIT-ROBO Rho GTPase-activating protein 1	+	64238540	64541613
ASHG19A3A034132	2.14101	1.09829	2.14101	up	145.096	284.621	7.07006	8.16835	noncoding	ENST00000425758	RP11-112E16.1	Ensembl	201	chr7	+	30207419	30207620		TGTGAAATACCCAGGATGCTACAAAATCACCATGGTCTTCAGTCACAAACGTGTGTTGGC	intergenic
ASHG19A3A020024	3.05853	1.61284	3.05853	up	150.159	416.524	7.12436	8.7372	noncoding	ENST00000450340	KB-67B5.11	Ensembl	246	chr22	+	16984193	16990365	NM_145862,NM_007194,NM_001005735,ENST00000423877,ENST00000416118,	TCAAGAAGTTGTTGGTAGTGGATCCAAAGGCACGTTTTATGACAGAAGAAGCCTTAAGAC	intergenic
ASHG19A3A036768	3.88659	1.95851	3.88659	up	763.9	2634.61	9.44385	11.4024	noncoding	ENST00000465034	KB-1554H10.1	Ensembl	731	chr8	+	95365150	95365881		AACTGGTGTGATCACCAACAGAGAAAAGACATCTTGGATCTTTTGATGTGGTTCATGTGA	intergenic
CUST_152_PI426073487	2.05858	1.04165	2.05858	up	3023.85	5835.77	11.4519	12.4936	noncoding	uc.154+	uc.154	UCR	203	chr5	+	72210014	72210217	NM_153188,NM_002270,	GAGTTTTTTGGGGCCACCAAATATTTTGGATCATGCAGAGAATATATATTGTACTGTAGT	exon sense-overlapping	NM_002270	TNPO1	transportin-1 isoform 1	+	72112417	72210215
CUST_152_PI426073487	2.05858	1.04165	2.05858	up	3023.85	5835.77	11.4519	12.4936	noncoding	uc.154+	uc.154	UCR	203	chr5	+	72210014	72210217	NM_153188,NM_002270,	GAGTTTTTTGGGGCCACCAAATATTTTGGATCATGCAGAGAATATATATTGTACTGTAGT	exon sense-overlapping	NM_153188	TNPO1	transportin-1 isoform 2	+	72143929	72210215
ASHG19A3A021500	3.33609	1.73816	3.33609	up	282.315	816.032	8.0152	9.75336	noncoding	ENST00000461190	RP11-521J5.1	Ensembl	712	chr3	-	123870806	123871910		ACAAAGGTGCTTCAAAAGGCAAGGAGGAAGCTTATCTATGAAAAAGCAAAGCACAGCCAG	intronic antisense	NM_001024660	KALRN	kalirin isoform 1	+	123813557	124440036
ASHG19A3A021500	3.33609	1.73816	3.33609	up	282.315	816.032	8.0152	9.75336	noncoding	ENST00000461190	RP11-521J5.1	Ensembl	712	chr3	-	123870806	123871910		ACAAAGGTGCTTCAAAAGGCAAGGAGGAAGCTTATCTATGAAAAAGCAAAGCACAGCCAG	intronic antisense	NM_003947	KALRN	kalirin isoform 2	+	123813557	124238698
ASHG19A3L0002851	4.3357	2.11626	4.3357	up	611.747	2349.96	9.1315	11.2478	noncoding	AK125219	lincRNA-HAUS7	lincRNA	2124	chrX	-	152713127	152760978	NM_017518,	ATGAACTAATGGAGAAATAGAAAGTCTTCAGTGATGGCCTACGCCAAAGCACAGGATGGG	intronic antisense	NM_001711	BGN	biglycan preproprotein	+	152760346	152775004
ASHG19A3L0002851	4.3357	2.11626	4.3357	up	611.747	2349.96	9.1315	11.2478	noncoding	AK125219	lincRNA-HAUS7	lincRNA	2124	chrX	-	152713127	152760978	NM_017518,	ATGAACTAATGGAGAAATAGAAAGTCTTCAGTGATGGCCTACGCCAAAGCACAGGATGGG	exon sense-overlapping	NM_017518	HAUS7	HAUS augmin-like complex subunit 7	-	152713122	152736603
ASHG19A3A043402	3.51249	1.81249	3.51249	up	261.299	791.557	7.90061	9.7131	noncoding	ENST00000442662	RP13-238F13.4	Ensembl	494	chr10	-	126178391	126179147		TTATGAACTCCTTTTTAAGGAGGGAGTCACGGTAGCCAAGAAGAATGTCCACCTGCCTAA	intronic antisense	NM_001167880	LHPP	phospholysine phosphohistidine inorganic	+	126150340	126302710
ASHG19A3A043402	3.51249	1.81249	3.51249	up	261.299	791.557	7.90061	9.7131	noncoding	ENST00000442662	RP13-238F13.4	Ensembl	494	chr10	-	126178391	126179147		TTATGAACTCCTTTTTAAGGAGGGAGTCACGGTAGCCAAGAAGAATGTCCACCTGCCTAA	intronic antisense	NM_022126	LHPP	phospholysine phosphohistidine inorganic	+	126150340	126302710
ASHG19A3A037953	3.53768	1.8228	3.53768	up	2434.87	8165.44	11.1239	12.9467	noncoding	ENST00000412010	RP11-402G3.4	Ensembl	394	chr9	-	117458201	117458595		TAGAAGGTGGAAATGCTGACAACAGGGGGGACCAGATCAACAGCCTTCTTAGAAGAATAA	intergenic
ASHG19A3A033078	2.74464	1.45661	2.74464	up	115.16	289.992	6.73787	8.19449	noncoding	ENST00000414541	AC004159.1	Ensembl	616	chr7	-	79725915	79726531		GTAAAAAACAGCCATACCCAAAGTCTCGTTTCTGCTGAGATCTGTATCTTTGGGTCGAAA	intergenic
ASHG19A3A029064	4.23016	2.08071	4.23016	up	1694.42	6617.61	10.5931	12.6738	noncoding	AL049404		NRED	2451	chr5	+	153434497	153436930	NR_024152,NM_005927,NM_001135037,	GCTCAGCCTTACATAGAAACTCCTAGATTTTCACTAACGCATTTCACAAAAGTAAATAAG	exon sense-overlapping	NM_005927	MFAP3	microfibril-associated glycoprotein 3 isoform 1	+	153418518	153437014
ASHG19A3A029064	4.23016	2.08071	4.23016	up	1694.42	6617.61	10.5931	12.6738	noncoding	AL049404		NRED	2451	chr5	+	153434497	153436930	NR_024152,NM_005927,NM_001135037,	GCTCAGCCTTACATAGAAACTCCTAGATTTTCACTAACGCATTTCACAAAAGTAAATAAG	exon sense-overlapping	NM_001135037	MFAP3	microfibril-associated glycoprotein 3 isoform 2	+	153418518	153437014
ASHG19A3A014477	3.51874	1.81506	3.51874	up	66.5873	217.841	5.94242	7.75748	noncoding	CR623291		misc_RNA	1077	chr2	-	152101986	152103089		TACACCACTACCAAATTCATGTGTCTGAAGTGATTCCTGGTATCTGGGAGGCTTAGACTG	intergenic
ASHG19A3A033494	2.56088	1.35664	2.56088	up	2085.78	4989.68	10.9072	12.2638	noncoding	ENST00000459978	RP11-20L24.1	Ensembl	637	chr7	-	127497904	127498541	NR_024465,NM_006110,	AGCTGGACCCCCTTCGTGGTCAGTTCTACAACTCCAAACGCATTGACTTTGACCTCTACA	intronic antisense	NM_014390	SND1	staphylococcal nuclease domain-containing	+	127292201	127732659
ASHG19A3A031189	5.50368	2.4604	5.50368	up	1307.77	6642.5	10.2177	12.6781	noncoding	ENST00000396818	RPL13P	Ensembl	632	chr6	+	28829192	28829824		CTTCGGCATATGGGCAAAAAGAGCCAAGGAAGCTGAAAAACAGGATGTGTGAAAGCAAAA	intergenic
ASHG19A3A031977	3.54398	1.82537	3.54398	up	2352.5	7925.82	11.0799	12.9053	noncoding	ENST00000335020	RP11-702N8.2	Ensembl	740	chr6	+	116359918	116360658	NR_027338,	AAGTTTGTTTTCGAGAAGAAAGAGGTCATCGCAGATAACGTGAAGGACTGGAGCAAGGTC	intronic antisense	NM_002031	FRK	tyrosine-protein kinase FRK	-	116262692	116381921
ASHG19A3A042342	3.32814	1.73472	3.32814	up	189.161	561.642	7.45354	9.18825	noncoding	ENST00000441274	RP11-490K7.1	Ensembl	475	chr1	-	31580994	31581469		AAACAAACAAGTTAAGGGCAAGATTCTTGCCGGAGAATTGATGTGCGTATTGAGCATATT	intergenic
ASHG19A3A024956	4.05442	2.0195	4.05442	up	48.9561	188.156	5.50324	7.52273	noncoding	ENST00000444644	RP4-641G12.4	Ensembl	1587	chr1	+	79214757	79216344		ATGTATAACGATGACCTAGAACCCAGAATAAAGACCAACAGATTTGTTCCCGACAAAGAG	intergenic
ASHG19A3A013715	2.54581	1.34813	2.54581	up	2907.08	6938.92	11.3905	12.7386	noncoding	ENST00000428700	RP11-511I11.1	Ensembl	312	chr2	-	63335252	63335564		ATGCCCACAAATACTCTGTGATATCCCCTTGGGCAAAACTGTCTTCAACAAGGATGGCTT	intergenic
ASHG19A3A048132	2.38527	1.25415	2.38527	up	147.281	322.19	7.0927	8.34685	noncoding	AK023831		NRED	5243	chr12	-	123571813	123577047		AATGAAAATGCCTGCCTTCAAGGGCTGTCTTGAGGTTGAAAGGAGATGGTCTACATCAAG	intron sense-overlapping	NM_020845	PITPNM2	membrane-associated phosphatidylinositol	-	123468026	123594975
ASHG19A3A007513	3.04908	1.60838	3.04908	up	249.385	660.111	7.83322	9.44159	noncoding	NR_027391	SLC15A3	RefSeq_NR	1965	chr11	-	60704554	60719257		GAGAGCCCAGGGCAGCAGCTACACGGAGTCCTGGAGATGGAGCGCTTACACTACATCCAC	exon sense-overlapping	NM_016582	SLC15A3	solute carrier family 15 member 3	-	60704554	60719257
ASHG19A3A007513	3.04908	1.60838	3.04908	up	249.385	660.111	7.83322	9.44159	noncoding	NR_027391	SLC15A3	RefSeq_NR	1965	chr11	-	60704554	60719257		GAGAGCCCAGGGCAGCAGCTACACGGAGTCCTGGAGATGGAGCGCTTACACTACATCCAC	natural antisense	NM_017870	TMEM132A	transmembrane protein 132A isoform a	+	60691912	60704631
ASHG19A3A007513	3.04908	1.60838	3.04908	up	249.385	660.111	7.83322	9.44159	noncoding	NR_027391	SLC15A3	RefSeq_NR	1965	chr11	-	60704554	60719257		GAGAGCCCAGGGCAGCAGCTACACGGAGTCCTGGAGATGGAGCGCTTACACTACATCCAC	natural antisense	NM_178031	TMEM132A	transmembrane protein 132A isoform b	+	60691912	60704631
ASHG19A3A021571	2.14542	1.10126	2.14542	up	109.073	218.273	6.65955	7.76081	noncoding	uc003emb.2	RPL32P3	UCSC_knowngene	2282	chr3	-	129101677	129118282	NR_003111,	TTCTCAGGGAGTGTTTTGGTGATACAGGCTGGGGAGTTAAATAAATGAACGAATAAACTT	intergenic
ASHG19A3A047778	2.96808	1.56953	2.96808	up	283.426	729.946	8.02177	9.5913	noncoding	ENST00000417216	RBMS1P1	Ensembl	1122	chr12	-	66627852	66628974	NM_002897,	TGTATCTGCCTACCAGGTGCAAAGTCCTTCTTGGACGCAACCTCAACCATATATTCTACA	intronic antisense	NM_001142523	IRAK3	interleukin-1 receptor-associated kinase 3	+	66582977	66648394
ASHG19A3A047778	2.96808	1.56953	2.96808	up	283.426	729.946	8.02177	9.5913	noncoding	ENST00000417216	RBMS1P1	Ensembl	1122	chr12	-	66627852	66628974	NM_002897,	TGTATCTGCCTACCAGGTGCAAAGTCCTTCTTGGACGCAACCTCAACCATATATTCTACA	intronic antisense	NM_007199	IRAK3	interleukin-1 receptor-associated kinase 3	+	66582977	66648394
ASHG19A3A028285	2.75303	1.46102	2.75303	up	133.047	334.939	6.94745	8.40847	noncoding	ENST00000509786	CTD-2194F4.2	Ensembl	737	chr5	+	64505747	64506775		AAGCTCTTGCTGCCACAGGAGAGAATCCAGTCTATGAGAAGCCCAAGAAAGAAGTTAAAA	intronic antisense	NM_197941	ADAMTS6	A disintegrin and metalloproteinase with	-	64444562	64777704
ASHG19A3A039230	4.1576	2.05575	4.1576	up	71.2041	272.37	6.0402	8.09595	noncoding	ENST00000429139	MIR181A2HG	Ensembl	662	chr9	+	127420745	127460910		ACTTTGTGATCTCATAACCTGTCAAGGGGCCTGGCATGGAGTAGATAATAAATGTTTTTT	intronic antisense	NM_001489	NR6A1	nuclear receptor subfamily 6 group A member 1	-	127284702	127533576
ASHG19A3A039230	4.1576	2.05575	4.1576	up	71.2041	272.37	6.0402	8.09595	noncoding	ENST00000429139	MIR181A2HG	Ensembl	662	chr9	+	127420745	127460910		ACTTTGTGATCTCATAACCTGTCAAGGGGCCTGGCATGGAGTAGATAATAAATGTTTTTT	intronic antisense	NM_033334	NR6A1	nuclear receptor subfamily 6 group A member 1	-	127284702	127533576
ASHG19A3A016567	3.1057	1.63492	3.1057	up	843.275	2307.79	9.58968	11.2246	noncoding	uc002ufj.3	KLHL23	UCSC_knowngene	1863	chr2	+	170606508	170608371		GAAGGTAATCTGCAAAACAAATTCATTGTGTTAGTGTAGCGGGATATGGAATGACTTTAT	exon sense-overlapping	NM_144711	KLHL23	kelch-like protein 23	+	170590355	170608396
ASHG19A3A016567	3.1057	1.63492	3.1057	up	843.275	2307.79	9.58968	11.2246	noncoding	uc002ufj.3	KLHL23	UCSC_knowngene	1863	chr2	+	170606508	170608371		GAAGGTAATCTGCAAAACAAATTCATTGTGTTAGTGTAGCGGGATATGGAATGACTTTAT	exon sense-overlapping	NM_001199290	PHOSPHO2-KLHL23	kelch-like protein 23	+	170550963	170608396
ASHG19A3A037391	2.87164	1.52187	2.87164	up	760.732	1895.85	9.4385	10.9604	noncoding	ENST00000437956	RP11-344H11.6	Ensembl	444	chr1	-	27312387	27312831	NM_021227,	TTGAGTATTTTCATGGCTAGAGTATTCATGAGAATGAAACTGCCGAGCTATCTGATGGGT	intergenic
ASHG19A3A038710	3.22136	1.68767	3.22136	up	448.924	1245.18	8.67291	10.3606	noncoding	ENST00000414918	RP11-12A20.8	Ensembl	346	chr9	+	67864635	67864981	ENST00000512403,ENST00000446396,ENST00000412428,	ATTTTAAGACTTGGTGGCTGAGAAACAACTCATCCTGGATGGCTGTGGGGCCAAATATAG	intergenic
ASHG19A3A000418	2.30712	1.20609	2.30712	up	44.751	102.503	5.372	6.57809	noncoding	ENST00000500108	AP006284.1	Ensembl	1668	chr11	-	573800	575885		TCTCATCGTGGGTGTCTGTGTTTATTATGACTCACCGAGGGCCAGCGGCGCTGGGGCCAG	bidirectional	NM_020901	PHRF1	PHD and RING finger domain-containing protein 1	+	576482	612222
ASHG19A3A036382	2.17412	1.12043	2.17412	up	325.908	623.244	8.22881	9.34925	noncoding	AK123645		RNAdb	2238	chr8	+	17081050	17083288		CTGAAATGAAAATTCTGCAGGATTTGGATGTGTACAGTCCTACGTTTCTATAATGTCTTA	intergenic
ASHG19A3A034361	2.55422	1.35288	2.55422	up	78.0544	189.151	6.17875	7.53163	noncoding	ENST00000452998	RP11-419M24.4	Ensembl	253	chr7	+	55945604	55945857		TAAAGAATGTATTTGACGAAGCAACATTGGCTGCGCTGGAGCCTCCAGAATCGAAGAAGA	intergenic
ASHG19A3A036497	4.36512	2.12602	4.36512	up	273.125	1026.55	7.96662	10.0926	noncoding	ENST00000498256	RP11-200A24.1	Ensembl	554	chr8	+	29489606	29490160		GTTCCTAAACCAGAAAAGGAAGTTGCCCAGAGGAAAAAGATATCCCAGAAGAAATTGAAG	intergenic
ASHG19A3A051052	2.09369	1.06605	2.09369	up	144.895	279.054	7.0672	8.13325	noncoding	AK055958		misc_RNA	2041	chr14	-	91314205	91316246		CAGTAAGGGCTTACTTTTTACCAACTTGTGTGTGTGTAAAGATGTATTTGTTCAAGCTTT	intergenic
ASHG19A3A028233	4.38177	2.13151	4.38177	up	65.3283	262.943	5.91198	8.04349	noncoding	ENST00000467688	RPL17P22	Ensembl	553	chr5	+	55432805	55433358		ACTTGTGAAATGCCCAGGCCATCAGGGTAGGCATATATGAAAAGCCACAAAGTATCTGAA	intronic antisense	NM_024669	ANKRD55	ankyrin repeat domain-containing protein 55	-	55395506	55529186
ASHG19A3A032925	4.57654	2.19426	4.57654	up	74.203	311.922	6.1035	8.29776	noncoding	ENST00000422823	RP11-416N13.1	Ensembl	811	chr7	-	64196310	64197121		CATCAGAGTGACAAGATTAACAAGTCAGAGTCTGTGGTGTATGTGGATATCCAGAAAAAT	intergenic
ASHG19A3A053199	3.2312	1.69207	3.2312	up	196.982	566.288	7.5086	9.20068	noncoding	uc010upk.1	AK301968	UCSC_knowngene	449	chr15	+	85788460	85790410	uc002bhm.2,uc002bgx.2,NR_003246,NM_198181,NM_001164465,ENST00000515341,ENST00000507199,	AGTCTGCAGCAGCAGCCAGACCAGTAGCTGGAGCCCCAGTCCCACAAGGAGCTTGGATGT	intergenic
ASHG19A3A037039	2.04427	1.03158	2.04427	up	357.914	639.774	8.35779	9.38938	noncoding	uc003zfy.2	AY343902	UCSC_knowngene	581	chr9	-	100994	102941		GGACATATTTGTACCCCATCTCTATTTAATGCCTTTATACAATTCTTAATTCTACCAGCC	intergenic
ASHG19A3A008787	2.22627	1.15463	2.22627	up	37.0392	82.9137	5.0947	6.24933	noncoding	BC002811		NRED	1686	chr17	-	73161681	73163344		CACTGCCATTTTATAGATGAGAAAGCCAAGTTCCAGAAAAGTTGTGAAATAGACGGTGAC	intergenic
ASHG19A3A034356	2.07754	1.05488	2.07754	up	3267.42	6373.04	11.5716	12.6264	noncoding	ENST00000438311	RP11-613E4.1	Ensembl	288	chr7	+	55799836	55800124	uc004eqf.2,NM_006937,NM_001005849,ENST00000508743,ENST00000445436,	GAAATGGAGAATGAAGATACAATTGATGTGTTCCAACAGCAGACGGGAGGTGTCTACTGA	intergenic
ASHG19A3A007551	5.35262	2.42025	5.35262	up	298.984	1406.19	8.10031	10.5206	noncoding	NR_027653	KLF6	RefSeq_NR	4525	chr10	-	3818188	3827473		CGTGCCCGGGGAGCTGCCCTCGCCAGGGAAGGAGAAAAGCCTTACAGATGCTCATGGGAA	exon sense-overlapping	NM_001160124	KLF6	Krueppel-like factor 6 isoform B	-	3818187	3827473
ASHG19A3A007551	5.35262	2.42025	5.35262	up	298.984	1406.19	8.10031	10.5206	noncoding	NR_027653	KLF6	RefSeq_NR	4525	chr10	-	3818188	3827473		CGTGCCCGGGGAGCTGCCCTCGCCAGGGAAGGAGAAAAGCCTTACAGATGCTCATGGGAA	exon sense-overlapping	NM_001160125	KLF6	Krueppel-like factor 6 isoform C	-	3818187	3827473
ASHG19A3A007551	5.35262	2.42025	5.35262	up	298.984	1406.19	8.10031	10.5206	noncoding	NR_027653	KLF6	RefSeq_NR	4525	chr10	-	3818188	3827473		CGTGCCCGGGGAGCTGCCCTCGCCAGGGAAGGAGAAAAGCCTTACAGATGCTCATGGGAA	exon sense-overlapping	NM_001300	KLF6	Krueppel-like factor 6 isoform A	-	3818187	3827473
ASHG19A3A049144	4.19855	2.06989	4.19855	up	623.14	2307.28	9.15357	11.2235	noncoding	CR601671		misc_RNA	2415	chr12	+	122629416	122631829		TTTTTCAGGTTCAGTTTGTTGTGTAAATGGCGGTTTTTTCTGGTGTGAGCTTTGGTGATG	intergenic
ASHG19A3A034851	3.98195	1.99348	3.98195	up	329.729	1139.09	8.24502	10.2385	noncoding	AK098134		misc_RNA	2814	chr7	+	102023051	102025864		TGTGAAGTCCACTGACTTCCGGGTGGAACAGGGTTCAGTATGCCAATTAAATTATTGGGT	intergenic
ASHG19A3A036961	4.15059	2.05332	4.15059	up	579.06	2112.07	9.04863	11.1019	noncoding	AK022255		NRED	2519	chr8	+	142180497	142183016		GCTTTATGTGATGTGATTCATGTAACAAGTGCTTCTGCCTTAAACCCAGAGTCTGTGCCT	intron sense-overlapping	NM_014957	DENND3	DENN domain-containing protein 3	+	142138719	142205900
ASHG19A3A049525	3.11952	1.64132	3.11952	up	1099.13	3080.78	9.97178	11.6131	noncoding	ENST00000426552	RP11-154C3.3	Ensembl	922	chr13	-	46261682	46262604		ACTTCAAGGTCTTCAACTTTGAACTGGGCAGCCAGGATATGACTACCTTACTCAGCTACA	intergenic
ASHG19A3A023572	2.66657	1.41498	2.66657	up	542.425	1250.14	8.95008	10.3651	noncoding	CR601404		RNAdb	1578	chr3	+	178956273	178957851		TATGCTCATCAGAAACTGTCAATGTCTGCTTTTCTTTAACTCTGCAGTCTGTAACATCAC	natural antisense	NM_001163677	KCNMB3	calcium-activated potassium channel subunit	-	178957536	178984838
ASHG19A3A009980	8.19356	3.03449	8.19356	up	187.084	1346.08	7.43405	10.4685	noncoding	NR_003013	SCARNA16	RefSeq_NR	187	chr17	+	75085388	75085574	ENST00000366365,	AGTAACAGGTGTGAGCATTCTAGCAGCAGTTTGATGATCATGTATGATACTGCAAACAGG	intron sense-overlapping	NM_001204410	SEC14L1	SEC14-like protein 1 isoform a	+	75085234	75213181
ASHG19A3A009980	8.19356	3.03449	8.19356	up	187.084	1346.08	7.43405	10.4685	noncoding	NR_003013	SCARNA16	RefSeq_NR	187	chr17	+	75085388	75085574	ENST00000366365,	AGTAACAGGTGTGAGCATTCTAGCAGCAGTTTGATGATCATGTATGATACTGCAAACAGG	intron sense-overlapping	NM_001204408	SEC14L1	SEC14-like protein 1 isoform b	+	75084724	75213181
ASHG19A3A033226	2.28158	1.19003	2.28158	up	75.4314	165.343	6.13012	7.32015	noncoding	ENST00000434352	AC073063.10	Ensembl	607	chr7	-	99040512	99041119		CTTCAGTTCCAACAAAAGTCTGTCATCTGAACACACCTATGGTTAACTTGGATAAGCCGA	intron sense-overlapping	NM_001198879	ATP5J2-PTCD1	ATP5J2-PTCD1 fusion protein	-	99014361	99063824
ASHG19A3A033226	2.28158	1.19003	2.28158	up	75.4314	165.343	6.13012	7.32015	noncoding	ENST00000434352	AC073063.10	Ensembl	607	chr7	-	99040512	99041119		CTTCAGTTCCAACAAAAGTCTGTCATCTGAACACACCTATGGTTAACTTGGATAAGCCGA	intronic antisense	NM_001081559	CPSF4	cleavage and polyadenylation specificity factor	+	99036562	99054996
ASHG19A3A033226	2.28158	1.19003	2.28158	up	75.4314	165.343	6.13012	7.32015	noncoding	ENST00000434352	AC073063.10	Ensembl	607	chr7	-	99040512	99041119		CTTCAGTTCCAACAAAAGTCTGTCATCTGAACACACCTATGGTTAACTTGGATAAGCCGA	intronic antisense	NM_006693	CPSF4	cleavage and polyadenylation specificity factor	+	99036562	99054996
ASHG19A3A021060	2.28456	1.19192	2.28456	up	120.494	254.422	6.80154	7.99346	noncoding	NR_004405	LAMB2L	RefSeq_NR	1543	chr3	-	49190292	49191834		CCCTCAGGTGGGAGTTTCGGAAACAAAAGGGAAATTGATTAAACTTGTATTATACACTGG	intergenic
ASHG19A3A014268	2.10873	1.07637	2.10873	up	108.368	213.228	6.64915	7.72552	noncoding	NR_027181	LOC84931	RefSeq_NR	2015	chr2	-	121221910	121223925		AATGAAGGCAAACTTCCCAACACCCCAAGCCATGGGATTGTCCTTCCTGGGGCCCTGACT	intergenic
ASHG19A3A043230	3.89696	1.96235	3.89696	up	60.6043	219.934	5.80842	7.77077	noncoding	AK022219		NRED	2089	chr10	-	103389059	103391148		GAGCCACTCAGTTGCTTCTTTCTTCTTCCAGGTGGAGTCATTTGTTCATTTGTCCATTCA	intron sense-overlapping	NM_022039	FBXW4	F-box/WD repeat-containing protein 4	-	103370420	103454743
ASHG19A3A042617	2.03928	1.02806	2.03928	up	843.494	1512.84	9.5907	10.6188	noncoding	uc001ixe.1	AX765705	UCSC_knowngene	688	chr10	-	34398517	34399205		TGTCTCTTCTGCATTTCTGTGTCATGGTTCTGTTTCTTAATCACGTGCGGCGGTGTCTAA	exon sense-overlapping	NM_001184785	PARD3	partitioning defective 3 homolog isoform 2	-	34398487	35104253
ASHG19A3A042617	2.03928	1.02806	2.03928	up	843.494	1512.84	9.5907	10.6188	noncoding	uc001ixe.1	AX765705	UCSC_knowngene	688	chr10	-	34398517	34399205		TGTCTCTTCTGCATTTCTGTGTCATGGTTCTGTTTCTTAATCACGTGCGGCGGTGTCTAA	exon sense-overlapping	NM_001184791	PARD3	partitioning defective 3 homolog isoform 8	-	34398487	35104253
ASHG19A3A042617	2.03928	1.02806	2.03928	up	843.494	1512.84	9.5907	10.6188	noncoding	uc001ixe.1	AX765705	UCSC_knowngene	688	chr10	-	34398517	34399205		TGTCTCTTCTGCATTTCTGTGTCATGGTTCTGTTTCTTAATCACGTGCGGCGGTGTCTAA	exon sense-overlapping	NM_001184789	PARD3	partitioning defective 3 homolog isoform 6	-	34398487	35104253
ASHG19A3A042617	2.03928	1.02806	2.03928	up	843.494	1512.84	9.5907	10.6188	noncoding	uc001ixe.1	AX765705	UCSC_knowngene	688	chr10	-	34398517	34399205		TGTCTCTTCTGCATTTCTGTGTCATGGTTCTGTTTCTTAATCACGTGCGGCGGTGTCTAA	exon sense-overlapping	NM_001184790	PARD3	partitioning defective 3 homolog isoform 7	-	34398487	35104253
ASHG19A3A042617	2.03928	1.02806	2.03928	up	843.494	1512.84	9.5907	10.6188	noncoding	uc001ixe.1	AX765705	UCSC_knowngene	688	chr10	-	34398517	34399205		TGTCTCTTCTGCATTTCTGTGTCATGGTTCTGTTTCTTAATCACGTGCGGCGGTGTCTAA	exon sense-overlapping	NM_001184786	PARD3	partitioning defective 3 homolog isoform 3	-	34398487	35104253
ASHG19A3A042617	2.03928	1.02806	2.03928	up	843.494	1512.84	9.5907	10.6188	noncoding	uc001ixe.1	AX765705	UCSC_knowngene	688	chr10	-	34398517	34399205		TGTCTCTTCTGCATTTCTGTGTCATGGTTCTGTTTCTTAATCACGTGCGGCGGTGTCTAA	exon sense-overlapping	NM_001184787	PARD3	partitioning defective 3 homolog isoform 4	-	34398487	35104253
ASHG19A3A042617	2.03928	1.02806	2.03928	up	843.494	1512.84	9.5907	10.6188	noncoding	uc001ixe.1	AX765705	UCSC_knowngene	688	chr10	-	34398517	34399205		TGTCTCTTCTGCATTTCTGTGTCATGGTTCTGTTTCTTAATCACGTGCGGCGGTGTCTAA	exon sense-overlapping	NM_001184788	PARD3	partitioning defective 3 homolog isoform 5	-	34398487	35104253
ASHG19A3A042617	2.03928	1.02806	2.03928	up	843.494	1512.84	9.5907	10.6188	noncoding	uc001ixe.1	AX765705	UCSC_knowngene	688	chr10	-	34398517	34399205		TGTCTCTTCTGCATTTCTGTGTCATGGTTCTGTTTCTTAATCACGTGCGGCGGTGTCTAA	exon sense-overlapping	NM_019619	PARD3	partitioning defective 3 homolog isoform 1	-	34398487	35104253
ASHG19A3A016869	2.2727	1.18441	2.2727	up	440.301	859.698	8.64795	9.83236	noncoding	uc002vbb.2	BC047484	UCSC_knowngene	1220	chr2	+	206950355	206951575		GGCTAAGTTCTGTGGCTGGTGGTCAGTTTGTAAATTTATACTTAAAGAGACTTAATAGTA	natural antisense	NM_017759	INO80D	INO80 complex subunit D	-	206858444	206950906
ASHG19A3A018501	3.41471	1.77176	3.41471	up	145.894	450.505	7.07821	8.84998	noncoding	ENST00000439558	RP5-907D15.2	Ensembl	648	chr20	+	57090782	57149026		AAGTGTACTGGCTCCTGTCCTGGATCAACTCAGAAAATGAAACACATCGGATTCTGTCCA	bidirectional	NM_153360	APCDD1L	protein APCDD1-like precursor	-	57034425	57089949
ASHG19A3A034368	2.11941	1.08366	2.11941	up	26463	97676.4	14.8568	15.9405	noncoding	ENST00000442064	RP4-725G10.3	Ensembl	389	chr7	+	56230837	56231226		TTGGGCATCCTCATGACCATTCTGCTCATCGTCATCCCAGTGTTGATCATCCAAGCCCAT	intergenic
ASHG19A3A049352	3.00472	1.58723	3.00472	up	7012.11	25208.6	12.6856	14.2729	noncoding	ENST00000414095	RP11-87C7.2	Ensembl	812	chr13	-	28270529	28271341		GAAGAATTGTTTCTGGATGACTGACCAGGAGGCTATTCAAGATCTCTGGCAGTGAAGGAA	intergenic
ASHG19A3A031034	2.93231	1.55204	2.93231	up	119.196	320.825	6.78641	8.33844	noncoding	ENST00000407932	RP3-525L6.2	Ensembl	359	chr6	+	17953802	17954161		GTGCTGTAGGACTATGGCAAAGAATCTCAGGTCAAGGATGTCACTGAAGAGTACTTCAAA	intronic antisense	NM_001105568	KIF13A	kinesin-like protein KIF13A isoform d	-	17760584	17987799
ASHG19A3A031034	2.93231	1.55204	2.93231	up	119.196	320.825	6.78641	8.33844	noncoding	ENST00000407932	RP3-525L6.2	Ensembl	359	chr6	+	17953802	17954161		GTGCTGTAGGACTATGGCAAAGAATCTCAGGTCAAGGATGTCACTGAAGAGTACTTCAAA	intronic antisense	NM_022113	KIF13A	kinesin-like protein KIF13A isoform a	-	17763923	17987799
ASHG19A3A031034	2.93231	1.55204	2.93231	up	119.196	320.825	6.78641	8.33844	noncoding	ENST00000407932	RP3-525L6.2	Ensembl	359	chr6	+	17953802	17954161		GTGCTGTAGGACTATGGCAAAGAATCTCAGGTCAAGGATGTCACTGAAGAGTACTTCAAA	intronic antisense	NM_001105566	KIF13A	kinesin-like protein KIF13A isoform b	-	17763923	17987799
ASHG19A3A031034	2.93231	1.55204	2.93231	up	119.196	320.825	6.78641	8.33844	noncoding	ENST00000407932	RP3-525L6.2	Ensembl	359	chr6	+	17953802	17954161		GTGCTGTAGGACTATGGCAAAGAATCTCAGGTCAAGGATGTCACTGAAGAGTACTTCAAA	intronic antisense	NM_001105567	KIF13A	kinesin-like protein KIF13A isoform c	-	17763923	17987799
ASHG19A3A023439	2.15568	1.10815	2.15568	up	48.3256	103.457	5.48458	6.59273	noncoding	ENST00000480817	RP11-555M1.3	Ensembl	320	chr3	+	156881240	156886922		ATTTGTGAAGATCTGAGCCCTCAGGTCCTCAATGGTCTTGAAATAATGGCTCCAGTCTCT	intergenic
ASHG19A3A020074	2.67937	1.42189	2.67937	up	69.6231	176.881	6.00654	7.42844	noncoding	ENST00000412461	AC004461.4	Ensembl	694	chr22	+	19043326	19044020		AAGAACGCCTGCACCATGCTCGGCAACATCACACACATGATCCGCAAGAACAAAGCCTCT	intronic antisense	NM_001173534	DGCR2	integral membrane protein DGCR2/IDD isoform 3	-	19023794	19109967
ASHG19A3A020074	2.67937	1.42189	2.67937	up	69.6231	176.881	6.00654	7.42844	noncoding	ENST00000412461	AC004461.4	Ensembl	694	chr22	+	19043326	19044020		AAGAACGCCTGCACCATGCTCGGCAACATCACACACATGATCCGCAAGAACAAAGCCTCT	intronic antisense	NM_005137	DGCR2	integral membrane protein DGCR2/IDD isoform 1	-	19023794	19109967
ASHG19A3A020074	2.67937	1.42189	2.67937	up	69.6231	176.881	6.00654	7.42844	noncoding	ENST00000412461	AC004461.4	Ensembl	694	chr22	+	19043326	19044020		AAGAACGCCTGCACCATGCTCGGCAACATCACACACATGATCCGCAAGAACAAAGCCTCT	intronic antisense	NM_001173533	DGCR2	integral membrane protein DGCR2/IDD isoform 2	-	19023794	19109967
ASHG19A3A020074	2.67937	1.42189	2.67937	up	69.6231	176.881	6.00654	7.42844	noncoding	ENST00000412461	AC004461.4	Ensembl	694	chr22	+	19043326	19044020		AAGAACGCCTGCACCATGCTCGGCAACATCACACACATGATCCGCAAGAACAAAGCCTCT	intronic antisense	NM_001184781	DGCR2	integral membrane protein DGCR2/IDD isoform 4	-	19023794	19109967
ASHG19A3A013336	2.74267	1.45558	2.74267	up	2114.38	5414.68	10.9284	12.384	noncoding	BC019085		NRED	1274	chr1	-	243665068	243666313		ATAGGGATGAACATGATTTTCCTTCGTACAGACAGCTTAAATAAAGCACTATGTCAATCT	intron sense-overlapping	NM_001206729	AKT3	RAC-gamma serine/threonine-protein kinase	-	243663020	244006886
ASHG19A3A013336	2.74267	1.45558	2.74267	up	2114.38	5414.68	10.9284	12.384	noncoding	BC019085		NRED	1274	chr1	-	243665068	243666313		ATAGGGATGAACATGATTTTCCTTCGTACAGACAGCTTAAATAAAGCACTATGTCAATCT	intron sense-overlapping	NM_181690	AKT3	RAC-gamma serine/threonine-protein kinase	-	243651534	244006584
ASHG19A3A013336	2.74267	1.45558	2.74267	up	2114.38	5414.68	10.9284	12.384	noncoding	BC019085		NRED	1274	chr1	-	243665068	243666313		ATAGGGATGAACATGATTTTCCTTCGTACAGACAGCTTAAATAAAGCACTATGTCAATCT	exon sense-overlapping	NM_005465	AKT3	RAC-gamma serine/threonine-protein kinase	-	243663020	244006584
ASHG19A3A042522	2.85884	1.51543	2.85884	up	167.043	430.888	7.27373	8.78916	noncoding	ENST00000453465	RP11-177H22.2	Ensembl	1695	chr10	-	21913520	21915215		ATGCTTACAACCAACCTGATTCCAAGCATCGTCAGACCAACAAACAACAGAACTGGGTCT	intronic antisense	NM_001195626	MLLT10	protein AF-10 isoform c	+	21823573	22032559
ASHG19A3A042522	2.85884	1.51543	2.85884	up	167.043	430.888	7.27373	8.78916	noncoding	ENST00000453465	RP11-177H22.2	Ensembl	1695	chr10	-	21913520	21915215		ATGCTTACAACCAACCTGATTCCAAGCATCGTCAGACCAACAAACAACAGAACTGGGTCT	intronic antisense	NM_004641	MLLT10	protein AF-10 isoform a	+	21823100	22032559
ASHG19A3A018715	3.12558	1.64413	3.12558	up	236.148	642.44	7.75254	9.39666	noncoding	ENST00000420241	EIF4A1P	Ensembl	934	chr21	-	28739332	28740266		ATGGATTCAAGGACCAGATCTATGTCATATTCCAAAGTTTAACAGCAACACCCAGGTAGT	intergenic
ASHG19A3A014552	2.86389	1.51798	2.86389	up	360.454	890.844	8.36829	9.88627	noncoding	ENST00000482477	AC009299.5	Ensembl	501	chr2	-	162197336	162197837	NM_198530,NM_001008529,NM_001008528,	TTCAAATACAGCCCCGGGAAGCTGAGGGGAAACCAGTACGAGAAGATGATGACCAAAGAG	intronic antisense	NM_005805	PSMD14	26S proteasome non-ATPase regulatory subunit 14	+	162164785	162268226
ASHG19A3L0001176	2.26758	1.18115	2.26758	up	332.205	658.838	8.25699	9.43815	noncoding	BM704421	lincRNA-NDUFA10	lincRNA	436	chr2	+	240323441	240324049		CCTGTGATTCTTGGTGGGGGAAACTAGTTATGTGGATAAAAATACAGTTAGCAAAATAAA	bidirectional	NM_006037	HDAC4	histone deacetylase 4	-	239969863	240322643
ASHG19A3A053972	13.9288	3.8	13.9288	up	71.8467	872.095	6.05295	9.85295	noncoding	AK125176		misc_RNA	3224	chr16	-	79237412	79240636		ACAGTTCATTTACACGTATGCCCCATAAGTATTCTATAACATAGTCCTGAAAAAGCACTG	intronic antisense	NM_016373	WWOX	WW domain-containing oxidoreductase isoform 1	+	78133550	79246564
ASHG19A3A010818	2.15712	1.1091	2.15712	up	3735.54	7755.58	11.7759	12.885	noncoding	ENST00000494093	AC005330.1	Ensembl	318	chr19	-	1307402	1307720		AACAGACCTTCCGCAACTTCACCCAGCGCGGCGTGGACCTGGACCAGCTACTGGACATGT	intergenic
ASHG19A3A008468	3.93159	1.97511	3.93159	up	248.672	844.118	7.8288	9.80391	noncoding	AK095350		NRED	2791	chr17	-	44624545	44627336		TCTTTTCTGGAATTAAAAGTACTTTGGGTGGTGGTGAGGGTCAGAGGAAGAAGTAAAGAT	natural antisense	NM_001006607	LRRC37A2	leucine-rich repeat-containing protein 37A2	+	44590075	44633014
ASHG19A3A008468	3.93159	1.97511	3.93159	up	248.672	844.118	7.8288	9.80391	noncoding	AK095350		NRED	2791	chr17	-	44624545	44627336		TCTTTTCTGGAATTAAAAGTACTTTGGGTGGTGGTGAGGGTCAGAGGAAGAAGTAAAGAT	intron sense-overlapping	NM_016632	ARL17A	ADP-ribosylation factor-like 17-like isoform b	-	44594067	44657088
ASHG19A3A038281	4.45933	2.15683	4.45933	up	46.979	196.848	5.44459	7.60141	noncoding	ENST00000437270	RP13-467E5.1	Ensembl	562	chr9	-	140535437	140535999		AGAGGTCAGCAAAGACCATACTTGGCCAAATTCATCACAGTGCTCCTTGGTTCCCAATAT	intronic antisense	NM_024757	EHMT1	histone-lysine N-methyltransferase EHMT1 isoform	+	140513443	140730578
ASHG19A3A038281	4.45933	2.15683	4.45933	up	46.979	196.848	5.44459	7.60141	noncoding	ENST00000437270	RP13-467E5.1	Ensembl	562	chr9	-	140535437	140535999		AGAGGTCAGCAAAGACCATACTTGGCCAAATTCATCACAGTGCTCCTTGGTTCCCAATAT	intronic antisense	NM_001145527	EHMT1	histone-lysine N-methyltransferase EHMT1 isoform	+	140513443	140678845
ASHG19A3A051262	2.67747	1.42087	2.67747	up	1426.47	3452.74	10.3466	11.7675	noncoding	ENST00000480068	RP11-689J19.1	Ensembl	315	chr14	+	21867083	21867398		ACCCAGAAATACAACTGCGACAAGATGATCTGCTGCAATTGTTATGCTAGTGCACATCCA	intronic antisense	NM_001170629	CHD8	chromodomain-helicase-DNA-binding protein 8	-	21853352	21899867
ASHG19A3A051262	2.67747	1.42087	2.67747	up	1426.47	3452.74	10.3466	11.7675	noncoding	ENST00000480068	RP11-689J19.1	Ensembl	315	chr14	+	21867083	21867398		ACCCAGAAATACAACTGCGACAAGATGATCTGCTGCAATTGTTATGCTAGTGCACATCCA	intronic antisense	NM_020920	CHD8	chromodomain-helicase-DNA-binding protein 8	-	21853352	21905457
ASHG19A3A030067	2.25339	1.17209	2.25339	up	11520.7	34447.7	13.441	14.6131	noncoding	ENST00000415663	RP3-445N2.1	Ensembl	330	chr6	-	56196585	56196915	NM_001102421,NM_001102420,BX648551,	TTTATGTACCTTAGTTCTGAGTTAGACCTGCAGATGCGTACAGATAGTTCATATTTATGT	intergenic
ASHG19A3A029632	3.25848	1.7042	3.25848	up	5779.93	22492.7	12.4146	14.1188	noncoding	ENST00000441380	IFITM4P	Ensembl	420	chr6	-	29718505	29718925		ATCATGACCATTCTGCTCACCGTCATCATCCTAGTGTTGATCTTCCAAGTCTGTCGATAG	intergenic
ASHG19A3A038235	3.40809	1.76896	3.40809	up	64.2886	203.712	5.88853	7.65749	noncoding	NR_003672	SNHG7	RefSeq_NR	2176	chr9	-	139619685	139622636		TTTGATAGTCTCACACTCCTGTTTTGTGGACAGGCATCTGTTTTCCTTCGCTGGTATCTG	intergenic
ASHG19A3A019639	3.45244	1.78762	3.45244	up	61.6525	198.648	5.83051	7.61813	noncoding	ENST00000440477	RP11-46E17.6	Ensembl	770	chr22	-	27853207	27856021		TGATTATCCTTGTTCTGGTCCCATGTATACTCTGTGGGCTACTCCTTTTTACTGGGGGAT	intergenic
ASHG19A3A025061	2.27804	1.18779	2.27804	up	382.064	751.141	8.44698	9.63477	noncoding	ENST00000503948	RP11-162O12.2	Ensembl	512	chr4	-	185220281	185220793		GGGAATTTCAATTACATCGAATTCACAAGCATCCTGAAACATGGAGTAAAAGACAAAGAT	intergenic
ASHG19A3A028026	2.758	1.46362	2.758	up	59.9336	158.907	5.79195	7.25558	noncoding	uc003jgj.2	BC038535	UCSC_knowngene	850	chr5	+	21616370	21779629		GCCTGTTGAAACTTTCTGATAATTTGAATGAAGTAAAGTTTGGAGTCTCTGTCTCATTGA	intronic antisense	NM_004061	CDH12	cadherin-12 preproprotein	-	21750972	22853731
ASHG19A3A010552	2.84708	1.50948	2.84708	up	284.144	701.41	8.02575	9.53523	noncoding	ENST00000468051	RP11-786F14.1	Ensembl	388	chr18	+	23678802	23679190		GCAAATATAGACTTACAAGACATGGCCTGTATGAGAAGAAAAAGACCTTAAGAAAACAGC	intergenic
ASHG19A3A045500	3.59757	1.84702	3.59757	up	788.567	2504.83	9.49032	11.3373	noncoding	ENST00000393516	AP003175.1	Ensembl	858	chr11	-	74790301	74791174		ACTTTGAAAATGTCTGTACAGCCAACAGTTACCCTGTGGGGCTTTGAAATAACACCACCT	intergenic
ASHG19A3A029637	2.78755	1.479	2.78755	up	611.018	1502.24	9.13036	10.6094	noncoding	ENST00000416822	MICG	Ensembl	132	chr6	-	29780341	29780473		CTGAGATCTCAGTCTCTGGTGTCAGCTCCTGGGTTCGCTGGCTCCACTGAGGGCAACTAG	intergenic
ASHG19A3A047412	2.37295	1.24668	2.37295	up	198.412	424.045	7.51861	8.76529	noncoding	ENST00000427577	RP11-181C21.4	Ensembl	921	chr1	-	78276545	78277466	NM_022831,ENST00000512016,ENST00000456674,	GGATGAAATTAAACCTGGGCCAATTGTAATAGAACTATACAAGAAACCCACTGACTTTAA	intronic antisense	NM_198549	FAM73A	hypothetical protein LOC374986	+	78245308	78344081
ASHG19A3A020841	2.07723	1.05466	2.07723	up	47.3013	97.9948	5.45389	6.50855	noncoding	ENST00000411661	AC096921.2	Ensembl	375	chr3	-	30667914	30668289		AATCATACCCAGCCTTTCAGACCCAGGTCAAGTGTTTTCTCTTTTGGAAAATCATCCATT	intronic antisense	NM_001024847	TGFBR2	TGF-beta receptor type-2 isoform A precursor	+	30647993	30735633
ASHG19A3A020841	2.07723	1.05466	2.07723	up	47.3013	97.9948	5.45389	6.50855	noncoding	ENST00000411661	AC096921.2	Ensembl	375	chr3	-	30667914	30668289		AATCATACCCAGCCTTTCAGACCCAGGTCAAGTGTTTTCTCTTTTGGAAAATCATCCATT	intronic antisense	NM_003242	TGFBR2	TGF-beta receptor type-2 isoform B precursor	+	30647993	30735633
ASHG19A3L0002198	2.85188	1.51191	2.85188	up	121.531	318.581	6.81525	8.32716	noncoding	chr9:126100254-126117679-	lincRNA-STRBP	lincRNA	17426	chr9	-	126100254	126117679		AAGAACAATCTCCTCAGTGTGGCCCTTGAGGTCCTGTGATCTGGCCTCTGTCCACCACCA	bidirectional	NM_173689	CRB2	crumbs homolog 2 precursor	+	126118447	126141032
ASHG19A3A012701	3.3381	1.73903	3.3381	up	87.6455	270.594	6.34763	8.08666	noncoding	AK126984		misc_RNA	3553	chr19	+	41334892	41338445		CCTGGAGTTTGAATTTTTTCCCAGTTGGTCTTAGTACCCTGTCTGCAGATTGAGGGGAAA	intergenic
ASHG19A3A013976	5.12033	2.35624	5.12033	up	245.247	1074.68	7.8063	10.1625	noncoding	ENST00000426110	AC092651.1	Ensembl	312	chr2	-	87345656	87348103	NR_026846,NM_022662,ENST00000454465,ENST00000452554,ENST00000427434,	AGGCGCTTTCAAACAGGAATGCATAGGGAGAAACATAAATCACCAAGTTATCAAATCAAA	intergenic
ASHG19A3A013083	2.16975	1.11753	2.16975	up	1470.96	2840.43	10.3955	11.5131	noncoding	ENST00000420757	RP11-467I20.3	Ensembl	454	chr1	-	240799898	240800352		CCCCGTTGTACTACAAGAACATCAGTCTGGGCTTCAAGAGGCTATTGAGGGCGCCCACAT	intergenic
ASHG19A3A008418	3.24157	1.69669	3.24157	up	648.39	1832.14	9.20859	10.9053	noncoding	ENST00000424341	AC003043.1	Ensembl	198	chr17	-	42442381	42442579		TACAGTGGGCTTCCTCAAGGAGATGGGCACACCTGGCTATCAGGGTGAACGCATCAGTCA	intergenic
ASHG19A3A014325	4.06216	2.02225	4.06216	up	565.617	2008.33	9.01712	11.0394	noncoding	NR_026740	LOC389033	RefSeq_NR	401	chr2	-	130680434	130691890		GGCCCCTGCTTTGCGCGCTGGCCGGGCTGGCCCTGCTCTGTGCCGTGGGCGCTTTGGCCG	intergenic
CUST_87_PI426075208	2.09157	1.06459	2.09157	up	184.861	351.062	7.41704	8.48163	noncoding	nc-HOXB2-161+	nc-HOXB2-161	HOX cluster	418	chr17	+	46622846	46623264		ACAACAGTTAAATCTTGGGAAATGGACAGGAACTCCCAGGCAGACACATAGGAGTGAGAT	bidirectional	NM_002145	HOXB2	homeobox protein Hox-B2	-	46620018	46622393
ASHG19A3A030839	2.13792	1.09621	2.13792	up	304.431	574.187	8.12662	9.22283	noncoding	ENST00000445442	RP11-503C24.6	Ensembl	445	chr6	-	168700862	168702794		AAATGTTTGTTCCTGCAAATGCATCTTCCATCCTGGGTGACAGGAAGTGTCTGGTTCCAT	intergenic
ASHG19A3A027685	2.10109	1.07114	2.10109	up	11272.5	30148.7	13.4067	14.4778	noncoding	ENST00000393839	AC091980.1	Ensembl	585	chr5	-	170772047	170772634		TAAGCCTGTGACTGTCCATTCCCAGGCTCAATGCCGGAAAAACACCTTGGCCCACCGGAA	intergenic
ASHG19A3A026094	2.46396	1.30098	2.46396	up	1970	4498.49	10.8193	12.1203	noncoding	AL157495		NRED	944	chr4	+	144474598	144475522		ATTGGGTACATAAACAGTTCTCCATTTTTCTAAGGGAATGCAATAAATGTAGCATCGTGA	exon sense-overlapping	NM_003601	SMARCA5	SWI/SNF-related matrix-associated	+	144434615	144478642
ASHG19A3A044295	3.00696	1.58831	3.00696	up	476.693	1233.6	8.76089	10.3492	noncoding	ENST00000394444	RP11-360G10.3	Ensembl	1190	chr10	+	93896631	93898127		GAAACCCTGATTGTCACCCTAGGCAGTCATCTTCATCAATACTGGAAAGAAGGTGGATTG	intronic antisense	NM_001178137	CPEB3	cytoplasmic polyadenylation element-binding	-	93808396	94003036
ASHG19A3A044295	3.00696	1.58831	3.00696	up	476.693	1233.6	8.76089	10.3492	noncoding	ENST00000394444	RP11-360G10.3	Ensembl	1190	chr10	+	93896631	93898127		GAAACCCTGATTGTCACCCTAGGCAGTCATCTTCATCAATACTGGAAAGAAGGTGGATTG	intronic antisense	NM_014912	CPEB3	cytoplasmic polyadenylation element-binding	-	93808396	94050875
ASHG19A3A037418	2.02583	1.01851	2.02583	up	56.6375	113.222	5.70966	6.72817	noncoding	ENST00000447613	RP11-327I22.5	Ensembl	957	chr9	-	43144979	43160008		AACTACAGAATCATTGCTTACATTGACACCGGCCCTGTTGTCCCAATGGATGGGTTTTTT	intergenic
ASHG19A3A009686	2.0659	1.04677	2.0659	up	96.367	188.725	6.48154	7.52831	noncoding	ENST00000515049	RP11-304F15.5	Ensembl	698	chr17	+	48016485	48017183	NM_016183,	AAACCTGATAGAAGAGCTTTGGAAATGTGTGGACACCTACAGTACCTTTTCATCTTCTCT	intergenic
ASHG19A3A024533	2.41248	1.27052	2.41248	up	266.859	565.205	7.92764	9.19815	noncoding	ENST00000511857	RP11-15B17.2	Ensembl	741	chr4	-	100911893	100912634	NM_198486,	TTTGGCGTCATTGGCTTGGAAGACCTCATTCATTAAATTGCCTTCCCAGGGAAGCATTTC	intergenic
ASHG19A3A053259	3.34021	1.73994	3.34021	up	3071.45	10274	11.4751	13.215	noncoding	ENST00000394218	AC116903.1	Ensembl	846	chr15	+	92829057	92829910	NM_199185,NM_002520,NM_001037738,ENST00000434232,ENST00000427761,ENST00000412580,	AAATAACACCACCAGTGATCTTACGGTTGAAGTGTGGTTCAGGGCCAGTGCATATTAGTG	intergenic
ASHG19A3A015541	5.47309	2.45236	5.47309	up	137.526	661.829	6.99338	9.44574	noncoding	ENST00000413306	AC011247.2	Ensembl	877	chr2	+	38708919	38709946	NM_053275,NM_001002,	CTTAAGATCATCCAACTATTGGATGATTATCCAAAATGTTTCATCGTGGGAGCAGACAAT	intergenic
ASHG19A3A041277	2.19753	1.13589	2.19753	up	108.966	222.874	6.65797	7.79385	noncoding	ENST00000446439	RP1-199L16.1	Ensembl	141	chrX	+	95450475	95450616		AATGTGTGCCACCAGTGTTTCCATCAGTATTTGAAGGATATAGGTTTCATTAAGTTGGAC	intergenic
ASHG19A3A039373	3.10486	1.63453	3.10486	up	2469.57	7111.2	11.1421	12.7766	noncoding	ENST00000426171	RP11-415H23.4	Ensembl	157	chr9	+	135837897	135838054		AATCAAATTAGGTACAACTCCAAAAGGAGATATTGAAGAAGAACCAAGCTGGGTCTATAA	intergenic
ASHG19A3A009855	2.92231	1.54711	2.92231	up	468.299	1173.55	8.73433	10.2814	noncoding	HIT000282650		H-invDB	1985	chr17	+	66201630	66203614		CGTAACCGAAGCAACAACCGGCAAGACTTTTCCTTTATAATTTTGCAAATCTAGATTAAT	intergenic
ASHG19A3A019152	2.03746	1.02677	2.03746	up	3047.71	5815.8	11.4627	12.4894	noncoding	ENST00000458495	TPT1P	Ensembl	518	chr21	+	33212652	33213170		CATTATTTGTGAGGACATGAATCCAGATGGCATGCTGGCTCTATTGGACTACCAGGAAGA	intergenic
ASHG19A3A015834	2.26408	1.17893	2.26408	up	74.2099	161.475	6.10366	7.28259	noncoding	AK023768		misc_RNA	4078	chr2	+	74090215	74094293		TGGAGAAGCTCTATGTCACCTTGTAGGAAGCCATCTGAATTTGACTCAGCATCATATGCT	intergenic
ASHG19A3A026637	3.83581	1.93953	3.83581	up	165.875	566.791	7.26404	9.20357	noncoding	BC013657		misc_RNA	969	chr5	-	31328303	31329252		TCGTTTGTCAGATTAACCCCATTTGAGGAGAAATTTGAGTTTGTGGTTCATGGGTTTTTG	intergenic
ASHG19A3A021622	3.27505	1.71152	3.27505	up	197.806	575.273	7.51366	9.22517	noncoding	AL133627		misc_RNA	1664	chr3	-	133871487	133873112		TTTAATGATTTGTCTTTAGAGGAGTGAGCACTCCTCTGGGGGTATATTACAACTGGGAAA	intergenic
ASHG19A3A013535	2.76239	1.46591	2.76239	up	252.623	608.79	7.85046	9.31637	noncoding	AK095013		misc_RNA	3590	chr2	-	40324915	40328505		GAATTCAGACTTCCTGCAGCTGCCATATCACCAATAAATGAGAATTGTGAAAAACAATTT	intergenic
ASHG19A3A007362	2.06062	1.04308	2.06062	up	3849.99	7621.91	11.824	12.8671	noncoding	NR_024611	HINT1	RefSeq_NR	809	chr5	-	130494874	130501026		GGTACTGGGCACCACCTCTCTCGCCTGCTGAGTGCCTTGCTTTCCATGACATTTCCCCTC	exon sense-overlapping	NM_005340	HINT1	histidine triad nucleotide-binding protein 1	-	130494874	130501034
ASHG19A3A050003	2.67486	1.41946	2.67486	up	5633.6	16821.2	12.3853	13.8048	noncoding	ENST00000421800	RP11-57H24.1	Ensembl	1220	chr13	+	29172969	29174189	NM_001416,	GAGACCTTCTATAATACCTCCATTGAGGAAATGCCCCTCAATGTTGCTGACCTCATCTGA	intergenic
ASHG19A3A014859	2.13675	1.09542	2.13675	up	68.8188	143.102	5.99116	7.08658	noncoding	AK055262		misc_RNA	2443	chr2	-	202140470	202145950		CATCAGAGCTAAACATAAGTCATCAGTCAAAAGGCAGTCTCAGCCAGGTGCAGTGGCTCA	intronic antisense	NM_001080124	CASP8	caspase-8 isoform C precursor	+	202098165	202152434
ASHG19A3A014859	2.13675	1.09542	2.13675	up	68.8188	143.102	5.99116	7.08658	noncoding	AK055262		misc_RNA	2443	chr2	-	202140470	202145950		CATCAGAGCTAAACATAAGTCATCAGTCAAAAGGCAGTCTCAGCCAGGTGCAGTGGCTCA	intronic antisense	NM_033358	CASP8	caspase-8 isoform E	+	202098165	202146638
ASHG19A3A014859	2.13675	1.09542	2.13675	up	68.8188	143.102	5.99116	7.08658	noncoding	AK055262		misc_RNA	2443	chr2	-	202140470	202145950		CATCAGAGCTAAACATAAGTCATCAGTCAAAAGGCAGTCTCAGCCAGGTGCAGTGGCTCA	intronic antisense	NM_001080125	CASP8	caspase-8 isoform G precursor	+	202122753	202152434
ASHG19A3A014859	2.13675	1.09542	2.13675	up	68.8188	143.102	5.99116	7.08658	noncoding	AK055262		misc_RNA	2443	chr2	-	202140470	202145950		CATCAGAGCTAAACATAAGTCATCAGTCAAAAGGCAGTCTCAGCCAGGTGCAGTGGCTCA	intronic antisense	NM_033355	CASP8	caspase-8 isoform B precursor	+	202098165	202152434
ASHG19A3A014859	2.13675	1.09542	2.13675	up	68.8188	143.102	5.99116	7.08658	noncoding	AK055262		misc_RNA	2443	chr2	-	202140470	202145950		CATCAGAGCTAAACATAAGTCATCAGTCAAAAGGCAGTCTCAGCCAGGTGCAGTGGCTCA	intronic antisense	NM_033356	CASP8	caspase-8 isoform C precursor	+	202125222	202152434
ASHG19A3A014859	2.13675	1.09542	2.13675	up	68.8188	143.102	5.99116	7.08658	noncoding	AK055262		misc_RNA	2443	chr2	-	202140470	202145950		CATCAGAGCTAAACATAAGTCATCAGTCAAAAGGCAGTCTCAGCCAGGTGCAGTGGCTCA	intronic antisense	NM_001228	CASP8	caspase-8 isoform A precursor	+	202098165	202152434
ASHG19A3A037272	3.66698	1.87459	3.66698	up	2783.56	10149.9	11.3276	13.2021	noncoding	ENST00000372214	RP11-571F15.3	Ensembl	645	chr9	-	34223981	34224626		CTAGAGGGGAAGGAGTTGGAGTTCTATCTTAGGAAAATCAAGGTCCGGAAAGGCAAATAA	intronic antisense	NM_001171202	UBAP1	ubiquitin-associated protein 1 isoform 3	+	34179002	34252521
ASHG19A3A037272	3.66698	1.87459	3.66698	up	2783.56	10149.9	11.3276	13.2021	noncoding	ENST00000372214	RP11-571F15.3	Ensembl	645	chr9	-	34223981	34224626		CTAGAGGGGAAGGAGTTGGAGTTCTATCTTAGGAAAATCAAGGTCCGGAAAGGCAAATAA	intronic antisense	NM_016525	UBAP1	ubiquitin-associated protein 1 isoform 1	+	34179002	34252521
ASHG19A3A037272	3.66698	1.87459	3.66698	up	2783.56	10149.9	11.3276	13.2021	noncoding	ENST00000372214	RP11-571F15.3	Ensembl	645	chr9	-	34223981	34224626		CTAGAGGGGAAGGAGTTGGAGTTCTATCTTAGGAAAATCAAGGTCCGGAAAGGCAAATAA	intronic antisense	NM_001171201	UBAP1	ubiquitin-associated protein 1 isoform 2	+	34179002	34252521
ASHG19A3A037272	3.66698	1.87459	3.66698	up	2783.56	10149.9	11.3276	13.2021	noncoding	ENST00000372214	RP11-571F15.3	Ensembl	645	chr9	-	34223981	34224626		CTAGAGGGGAAGGAGTTGGAGTTCTATCTTAGGAAAATCAAGGTCCGGAAAGGCAAATAA	intronic antisense	NM_001171204	UBAP1	ubiquitin-associated protein 1 isoform 1	+	34179002	34252521
ASHG19A3A037272	3.66698	1.87459	3.66698	up	2783.56	10149.9	11.3276	13.2021	noncoding	ENST00000372214	RP11-571F15.3	Ensembl	645	chr9	-	34223981	34224626		CTAGAGGGGAAGGAGTTGGAGTTCTATCTTAGGAAAATCAAGGTCCGGAAAGGCAAATAA	intronic antisense	NM_001171203	UBAP1	ubiquitin-associated protein 1 isoform 1	+	34179002	34252521
ASHG19A3A047769	2.54366	1.3469	2.54366	up	1030.83	2307.52	9.87704	11.2239	noncoding	ENST00000399791	AC079948.1	Ensembl	399	chr12	-	65813008	65813407		AACCATGAAGAGGAAGTAAAAGGCCTACAAGCCCAGATTGTCAGCTCTGGTTTGATCTTG	intronic antisense	NM_001193461	MSRB3	methionine-R-sulfoxide reductase B3 isoform 2	+	65672766	65860687
ASHG19A3A047769	2.54366	1.3469	2.54366	up	1030.83	2307.52	9.87704	11.2239	noncoding	ENST00000399791	AC079948.1	Ensembl	399	chr12	-	65813008	65813407		AACCATGAAGAGGAAGTAAAAGGCCTACAAGCCCAGATTGTCAGCTCTGGTTTGATCTTG	intronic antisense	NM_198080	MSRB3	methionine-R-sulfoxide reductase B3 isoform 1	+	65672422	65860687
ASHG19A3A047769	2.54366	1.3469	2.54366	up	1030.83	2307.52	9.87704	11.2239	noncoding	ENST00000399791	AC079948.1	Ensembl	399	chr12	-	65813008	65813407		AACCATGAAGAGGAAGTAAAAGGCCTACAAGCCCAGATTGTCAGCTCTGGTTTGATCTTG	intronic antisense	NM_001031679	MSRB3	methionine-R-sulfoxide reductase B3 isoform 2	+	65672422	65860687
ASHG19A3A047769	2.54366	1.3469	2.54366	up	1030.83	2307.52	9.87704	11.2239	noncoding	ENST00000399791	AC079948.1	Ensembl	399	chr12	-	65813008	65813407		AACCATGAAGAGGAAGTAAAAGGCCTACAAGCCCAGATTGTCAGCTCTGGTTTGATCTTG	intronic antisense	NM_001193460	MSRB3	methionine-R-sulfoxide reductase B3 isoform 2	+	65672422	65860687
ASHG19A3A050188	2.15771	1.1095	2.15771	up	764.066	1441.35	9.44416	10.5537	noncoding	NR_002605	DLEU1	RefSeq_NR	874	chr13	+	50656413	50679431		ATTTTGTGTTCCTATCAAAGTGTCGTATCTGGGAGATGACCTGCCTTATCCTGTTCTATA	intergenic
ASHG19A3A012971	3.33632	1.73826	3.33632	up	861.264	2549.22	9.62168	11.3599	noncoding	ENST00000391776	AC010328.2	Ensembl	492	chr19	+	53507295	53507788	NM_006409,ENST00000511688,	TCAGCTTGGATTGGCATCCCAACAATGTTTTGCTGGCAGCAGGATCATGTGACTTCAAAT	intergenic
ASHG19A3A011437	2.20818	1.14285	2.20818	up	127.381	260.318	6.88558	8.02843	noncoding	AK095904		NRED	2570	chr1	-	222834744	222837316		GGTAGAGGCCCGTCCACTGATCCTTGAGAAAGAAATAACAGAGTCCTTATATGTATTTTT	natural antisense	NM_198551	MIA3	melanoma inhibitory activity protein 3	+	222791443	222841351
ASHG19A3A000413	4.13931	2.04939	4.13931	up	1785.49	6842.94	10.6708	12.7202	noncoding	ENST00000499461	AL663074.1	Ensembl	2043	chr1	+	21080975	21083505		TAAGATGGGAGGATTGCTTGAGCCAGGGAGGTGGAATAGGGAGTGACTGCAAATGGCTAC	intronic antisense	NM_016287	HP1BP3	heterochromatin protein 1-binding protein 3	-	21069170	21113181
ASHG19A3A033338	2.08829	1.06232	2.08829	up	99.9902	195.851	6.53002	7.59234	noncoding	uc003vcr.1	AF520792	UCSC_knowngene	999	chr7	-	104754466	104755465		CTGACATAATTGTGATTTATTAACATGAATTAAAATGCCCAACCAGTGCTTCAGTGTGAC	natural antisense	NM_182931	MLL5	histone-lysine N-methyltransferase MLL5	+	104654636	104754532
ASHG19A3A033338	2.08829	1.06232	2.08829	up	99.9902	195.851	6.53002	7.59234	noncoding	uc003vcr.1	AF520792	UCSC_knowngene	999	chr7	-	104754466	104755465		CTGACATAATTGTGATTTATTAACATGAATTAAAATGCCCAACCAGTGCTTCAGTGTGAC	natural antisense	NM_018682	MLL5	histone-lysine N-methyltransferase MLL5	+	104654636	104754532
ASHG19A3A043059	2.47623	1.30814	2.47623	up	3318.21	7897.47	11.5926	12.9007	noncoding	ENST00000481963	RPL7AP8	Ensembl	804	chr10	-	88390581	88391385		GTTCGCATCGCCAAGCTCAAAAAGGCAAAGGCTAAAGAATTTGCCATTAAACTGGGTTAA	intergenic
ASHG19A3A033971	2.67862	1.42149	2.67862	up	1386.54	3332.91	10.2941	11.7156	noncoding	NR_033436	PHF14	RefSeq_NR	2644	chr7	+	11013498	11209249	NM_001007157,	TCTCCTAAACAGACAGGCTACGGATGGATATGTCAGGAATGTGATTCTTCATCTTCCAAG	exon sense-overlapping	NM_014660	PHF14	PHD finger protein 14	+	11013498	11147376
ASHG19A3A036226	2.16176	1.11221	2.16176	up	140.16	278.87	7.01928	8.13149	noncoding	G36762		misc_RNA	487	chr1	+	182542771	182543258		TAAGGTACTGTTTTATTCCCATTACAAAGCTCCATCTCAACCACCACAATGATTCATGGA	natural antisense	NM_021133	RNASEL	2-5A-dependent ribonuclease	-	182542768	182558394
ASHG19A3A009176	4.34522	2.11943	4.34522	up	39.2152	163.043	5.1795	7.29892	noncoding	ENST00000445583	AC022596.1	Ensembl	3217	chr17	+	16691370	16719854		TCTGTCAACACTGATTCTTTCTCATACAACAGGCACTTGCCAACACTCTGCCCAGCCAGA	intergenic
ASHG19A3A031492	9.93579	3.31263	9.93579	up	285.611	2525.17	8.03281	11.3454	noncoding	ENST00000445179	RP1-140J1.4	Ensembl	927	chr1	+	153197555	153198482		CAAGGCTGAAGCCAAGAAGAGTTGGAGGAGTTGGATGAGAATATGGGATTTGGCCTATTT	intergenic
ASHG19A3A045640	9.26027	3.21105	9.26027	up	169.413	1386.08	7.29251	10.5036	noncoding	uc001phs.2	CASP12	UCSC_knowngene	614	chr11	-	104756441	104758028		GCTCAGCTGTCCACCTTTTCAAATACCAGGCTAAAATCAATCTCATATTTTTGCTAAATT	exon sense-overlapping	NM_001191016	CASP12	inactive caspase-12	-	104756444	104769397
ASHG19A3A049476	2.60986	1.38397	2.60986	up	110.022	265.314	6.67289	8.05686	noncoding	BC014346		misc_RNA	986	chr13	-	41110397	41111324		ACCTTGGGGTCTTGGGAGTAGAACTTTAGCTTTGAATAATTTAAGGGCTTGGCCTGTAAC	intergenic
ASHG19A3A031098	4.07252	2.02592	4.07252	up	457.132	1624.18	8.69681	10.7227	noncoding	uc010jqf.1	HFE	UCSC_knowngene	442	chr6	+	26096614	26097056		GCTTCAGGATACCATATACAGCTCAGAAGTTTCTTCTTTAGGCATTAAATTTTAGCAAAG	intergenic
ASHG19A3A030457	2.14016	1.09772	2.14016	up	167.2	327.098	7.27515	8.37287	noncoding	ENST00000445225	RP11-277L2.2	Ensembl	5730	chr1	+	149576489	149651107		CATACTTACTTCTGGAAATATATGCCTTTCCTAAAACTTAACCACACATCCACTACCATG	intergenic
ASHG19A3A040654	2.09826	1.0692	2.09826	up	282.392	524.56	8.0155	9.08469	noncoding	ENST00000329806	RP11-558O12.1	Ensembl	437	chrX	+	3635189	3635626		AATGACAAAATTAGTGCCCTTCTGACGAATGTGGAGCTGGAGTGTTTCTGGTAAGCCACT	intergenic
ASHG19A3A036564	2.37182	1.246	2.37182	up	394.924	808.785	8.49429	9.74028	noncoding	ENST00000479278	CTD-3080F16.1	Ensembl	138	chr8	+	41128951	41129089		ATGTGCTGCCAGTGTTTCCATCAGTATGCAGAGGAGGTAGGCTTCATTAGGTTAGACTAA	intronic antisense	NM_003012	SFRP1	secreted frizzled-related protein 1 precursor	-	41119475	41166990
ASHG19A3A032395	2.20268	1.13926	2.20268	up	41.1982	90.7723	5.25371	6.39297	noncoding	ENST00000452804	RP11-243J18.3	Ensembl	3849	chr1	+	155715619	155721344		TACTAAGGTTGGACTTCCTTATCAGTTTGGCGAGTCCCAGGGCAGAATAATCATCCATCT	natural antisense	NM_001037533	GON4L	GON-4-like protein isoform a	-	155719509	155826972
ASHG19A3A035974	2.21648	1.14827	2.21648	up	103.837	214.362	6.58623	7.7345	noncoding	ENST00000513953	RP11-44N17.1	Ensembl	953	chr8	-	97080956	97081909		GCTGGTGAAATGCCCTCAATTACCACTTACTTTGTCAACCTCATTTCCTGGTATGACAAT	intergenic
ASHG19A3A045935	2.4996	1.3217	2.4996	up	28.0117	71.155	4.69166	6.01335	noncoding	ENST00000319941	AP006621.1	Ensembl	633	chr11	+	780116	780755		ACAGGACATGTCATCAGCAGTGAAAAGGTTTTGTTCCGTTTCCTGCCTTCAGAACTTGCA	intergenic
ASHG19A3A042978	2.05333	1.03796	2.05333	up	213.685	392.241	7.61904	8.657	noncoding	ENST00000436122	RP11-506B4.2	Ensembl	256	chr10	-	76104307	76104563		ACTTCAGGAATGTAATATTCAGCAGAATGAAGCTCTGGCAGCCAAAGCAGGACTACTTGG	intronic antisense	NM_001202449	ADK	adenosine kinase isoform c	+	75936246	76469061
ASHG19A3A042978	2.05333	1.03796	2.05333	up	213.685	392.241	7.61904	8.657	noncoding	ENST00000436122	RP11-506B4.2	Ensembl	256	chr10	-	76104307	76104563		ACTTCAGGAATGTAATATTCAGCAGAATGAAGCTCTGGCAGCCAAAGCAGGACTACTTGG	intronic antisense	NM_001123	ADK	adenosine kinase isoform a	+	75936246	76469061
ASHG19A3A042978	2.05333	1.03796	2.05333	up	213.685	392.241	7.61904	8.657	noncoding	ENST00000436122	RP11-506B4.2	Ensembl	256	chr10	-	76104307	76104563		ACTTCAGGAATGTAATATTCAGCAGAATGAAGCTCTGGCAGCCAAAGCAGGACTACTTGG	intronic antisense	NM_006721	ADK	adenosine kinase isoform b	+	75910942	76469061
ASHG19A3A042978	2.05333	1.03796	2.05333	up	213.685	392.241	7.61904	8.657	noncoding	ENST00000436122	RP11-506B4.2	Ensembl	256	chr10	-	76104307	76104563		ACTTCAGGAATGTAATATTCAGCAGAATGAAGCTCTGGCAGCCAAAGCAGGACTACTTGG	intronic antisense	NM_001202450	ADK	adenosine kinase isoform d	+	75910942	76469061
ASHG19A3A048336	5.23324	2.3877	5.23324	up	776.08	3669.16	9.46793	11.8556	noncoding	uc009zgg.1	RIMKLB	UCSC_knowngene	1887	chr12	+	8931626	8935685		TGAAGCAAGGGGGACAAAAATGGAAACAGGACTAAGATTCCTGCATTTTGACTCTAAATG	intergenic
ASHG19A3A038607	4.83367	2.27312	4.83367	up	105.408	460.118	6.60628	8.8794	noncoding	ENST00000377613	RP11-204M4.3	Ensembl	2248	chr9	+	42018914	42021277	uc004aeg.3,NR_015363,ENST00000450704,	CATTATGGTGGCAGGTGACAGACAATACAAAGAGATAAAGCAATTTCATATAGTGATAAG	intergenic
ASHG19A3A019007	4.21314	2.0749	4.21314	up	165.449	617.845	7.26081	9.33571	noncoding	CR602937		misc_RNA	2081	chr21	-	46932522	46934603		GTCACTTTTATTTGCCTGTCTGAATTGGCTTCACATCACACACAATTACAGAACCAGCCC	natural antisense	NM_030582	COL18A1	collagen alpha-1(XVIII) chain isoform 1	+	46875423	46933634
ASHG19A3A019007	4.21314	2.0749	4.21314	up	165.449	617.845	7.26081	9.33571	noncoding	CR602937		misc_RNA	2081	chr21	-	46932522	46934603		GTCACTTTTATTTGCCTGTCTGAATTGGCTTCACATCACACACAATTACAGAACCAGCCC	natural antisense	NM_130445	COL18A1	collagen alpha-1(XVIII) chain isoform 2	+	46825096	46933634
ASHG19A3A038132	2.33881	1.22578	2.33881	up	44.0929	102.361	5.35015	6.57593	noncoding	ENST00000321081	AL358781.1	Ensembl	738	chr9	-	134374795	134375537	uc004cas.1,	TTTCCCATTCATCACAGAACACGACAGAGTGCACACATCCTGGTATCCTTGGTCTTCAAA	natural antisense	NM_013318	PRRC2B	protein PRRC2B	+	134305476	134375575
ASHG19A3A028391	2.49507	1.31908	2.49507	up	5232.2	14145.5	12.2874	13.6065	noncoding	ENST00000494006	CTD-2235C13.1	Ensembl	347	chr5	+	74670287	74670634		AAGTAGTCAGGAATCGATCTCATGAAGGAGAAGGATCGAACACCTCCACCCCAATTTAGA	intronic antisense	NM_005713	COL4A3BP	collagen type IV alpha-3-binding protein isoform	-	74666927	74807454
ASHG19A3A028391	2.49507	1.31908	2.49507	up	5232.2	14145.5	12.2874	13.6065	noncoding	ENST00000494006	CTD-2235C13.1	Ensembl	347	chr5	+	74670287	74670634		AAGTAGTCAGGAATCGATCTCATGAAGGAGAAGGATCGAACACCTCCACCCCAATTTAGA	intronic antisense	NM_001130105	COL4A3BP	collagen type IV alpha-3-binding protein isoform	-	74666927	74807806
ASHG19A3A028391	2.49507	1.31908	2.49507	up	5232.2	14145.5	12.2874	13.6065	noncoding	ENST00000494006	CTD-2235C13.1	Ensembl	347	chr5	+	74670287	74670634		AAGTAGTCAGGAATCGATCTCATGAAGGAGAAGGATCGAACACCTCCACCCCAATTTAGA	intronic antisense	NM_031361	COL4A3BP	collagen type IV alpha-3-binding protein isoform	-	74666927	74807454
ASHG19A3A043751	3.58361	1.84141	3.58361	up	293.872	910.443	8.07894	9.92035	noncoding	AK092850		NRED	2601	chr10	+	29750601	29753202		TAGCAGTGAGGTGAGCTCATGGCTCTCTTACAGAGAAATGGGCCTTAAAAAGCAAAACTG	natural antisense	NM_021738	SVIL	supervillin isoform 2	-	29746276	29923901
ASHG19A3A043751	3.58361	1.84141	3.58361	up	293.872	910.443	8.07894	9.92035	noncoding	AK092850		NRED	2601	chr10	+	29750601	29753202		TAGCAGTGAGGTGAGCTCATGGCTCTCTTACAGAGAAATGGGCCTTAAAAAGCAAAACTG	natural antisense	NM_003174	SVIL	supervillin isoform 1	-	29746276	30024730
ASHG19A3A032885	8.40414	3.0711	8.40414	up	63.5866	479.001	5.87205	8.94315	noncoding	ENST00000417498	RP11-73B2.1	Ensembl	730	chr7	-	62827804	62828534		CCTGCTGTTATGAGTTGCTTTGTGGTCATGTATCCTATGAACCTTCTTATTTCAACATCC	intergenic
ASHG19A3A038545	5.46734	2.45084	5.46734	up	365.212	1760.22	8.38486	10.8357	noncoding	NR_024283	LOC158376	RefSeq_NR	1546	chr9	+	35909479	35911617	ENST00000443779,	AGTTTTTATTAACAGAAAACCCATTCTCCCATGGCCATGGAATAAATGCCATGCTATATT	intergenic
ASHG19A3A035469	2.55037	1.35071	2.55037	up	7715.48	23757.5	12.8415	14.1922	noncoding	ENST00000514593	GS1-24F4.1	Ensembl	375	chr8	-	6756399	6756990	ENST00000456160,	AAAGTGAAGGCTTTGAAGGCCAAGAAGGTAGTGTTGAAAGGCGTCCACAGCCACAAAAAA	intergenic
ASHG19A3A039914	4.45501	2.15543	4.45501	up	587.408	2309.35	9.06969	11.2251	noncoding	ENST00000458691	RP13-77O11.2	Ensembl	1196	chrX	-	52861753	52862949	NM_001967,	AATTATGATCTACCTACCAATCGTGAAACTATATTCACAGAATTGGCAGAGGGGGTCTAT	intergenic
ASHG19A3A026914	3.89857	1.96294	3.89857	up	115.933	408.193	6.74751	8.71045	noncoding	ENST00000502466	RP11-589F5.3	Ensembl	3658	chr5	-	70070477	70074135	ENST00000502532,	GAATGTTTCGTGTTCGAAACTGTTTGAGGGGTTTGGGTTTATTTTTGTTGGTTTTTTCTT	intergenic
ASHG19A3A020264	2.21762	1.14901	2.21762	up	2531.14	5245.17	11.1825	12.3315	noncoding	ENST00000395823	HMGB1L10	Ensembl	563	chr22	+	26956491	26957054	NM_002128,HIT000295929,ENST00000507778,ENST00000452569,ENST00000452520,AK122825,	AAGAAACTGGGAGAGATGTGGAATAACACTGCCGCAGATGACAAGCAGCCTTATGAAAAG	intronic antisense	NM_003595	TPST2	protein-tyrosine sulfotransferase 2	-	26921713	26986089
ASHG19A3A020264	2.21762	1.14901	2.21762	up	2531.14	5245.17	11.1825	12.3315	noncoding	ENST00000395823	HMGB1L10	Ensembl	563	chr22	+	26956491	26957054	NM_002128,HIT000295929,ENST00000507778,ENST00000452569,ENST00000452520,AK122825,	AAGAAACTGGGAGAGATGTGGAATAACACTGCCGCAGATGACAAGCAGCCTTATGAAAAG	intronic antisense	NM_001008566	TPST2	protein-tyrosine sulfotransferase 2	-	26921713	26961370
ASHG19A3A020891	3.24468	1.69808	3.24468	up	40.2597	128.228	5.21794	6.91602	noncoding	ENST00000440724	RP11-815I22.1	Ensembl	485	chr3	-	38311773	38312258		TCTTGTAAAACTTGCCAAGAACAAAAAACAGAAGCCTATCACTCCAGACTGGCCTCGGAC	intronic antisense	NM_004256	SLC22A13	solute carrier family 22 member 13	+	38307297	38319806
ASHG19A3A051969	2.97082	1.57086	2.97082	up	44.7757	130.25	5.37263	6.94349	noncoding	ENST00000456396	RP11-68I18.2	Ensembl	171	chr1	-	151084387	151085204		TCCGGAAATATGGCCTCAATATATACCGTCAGCCTTTCCATCAGTACATGAAGGATATAG	intronic antisense	NM_144618	GABPB2	GA-binding protein subunit beta-2	+	151043079	151091007
ASHG19A3A052043	2.41263	1.27061	2.41263	up	54.5434	128.883	5.65386	6.92446	noncoding	AL137436		misc_RNA	914	chr15	-	42188133	42189031		TATATAGAAATGAGCCTATTGATGCAACAATATAAATGGCACTGAGAGGGGTGTCCAGAG	intergenic
ASHG19A3A035397	2.71522	1.44107	2.71522	up	1874.2	4726.4	10.7491	12.1902	noncoding	ENST00000431047	AC005534.6	Ensembl	433	chr7	+	156426048	156426481		CTTGAACAGAAAGCCAAATCTCGCCAAGTAGGAAAAGGGCAAATACAAGGAAGAAACAAT	intergenic
ASHG19A3A043762	3.18766	1.6725	3.18766	up	102.042	298.431	6.56112	8.23362	noncoding	ENST00000426067	RP11-253D19.2	Ensembl	378	chr10	+	30865627	30869111		TTTCAAGACCAGCCTGCTTTCAAGGTGTCAACTGATCGTGTAGACAATGTCTCAAAAAAC	intergenic
ASHG19A3A019205	2.07141	1.05061	2.07141	up	46.1056	95.5118	5.41771	6.46832	noncoding	uc002yus.1	AX813477	UCSC_knowngene	101	chr21	+	36231770	36231871		TTTTGATGGCTCTGTGGTAGGTGGCGACTTGCGGTGGGTTTGTGAAGACAGTGATGGTCA	natural antisense	NM_001001890	RUNX1	runt-related transcription factor 1 isoform	-	36160097	36260987
ASHG19A3A019205	2.07141	1.05061	2.07141	up	46.1056	95.5118	5.41771	6.46832	noncoding	uc002yus.1	AX813477	UCSC_knowngene	101	chr21	+	36231770	36231871		TTTTGATGGCTCTGTGGTAGGTGGCGACTTGCGGTGGGTTTGTGAAGACAGTGATGGTCA	natural antisense	NM_001754	RUNX1	runt-related transcription factor 1 isoform	-	36160097	36421595
ASHG19A3A019205	2.07141	1.05061	2.07141	up	46.1056	95.5118	5.41771	6.46832	noncoding	uc002yus.1	AX813477	UCSC_knowngene	101	chr21	+	36231770	36231871		TTTTGATGGCTCTGTGGTAGGTGGCGACTTGCGGTGGGTTTGTGAAGACAGTGATGGTCA	natural antisense	NM_001122607	RUNX1	runt-related transcription factor 1 isoform	-	36193573	36260987
ASHG19A3A042217	2.63061	1.3954	2.63061	up	287.41	658.927	8.04323	9.43863	noncoding	ENST00000431853	CTBP2P1	Ensembl	245	chrY	+	59001390	59001635		TTGTCACATCTGTGCTTTGGTCAGTAATAGACCAGCAAGCAATTCATCCAGTCATCGTGG	intergenic
ASHG19A3A016801	7.93801	2.98878	7.93801	up	412.473	2912.85	8.55272	11.5415	noncoding	ENST00000429216	AC007272.2	Ensembl	963	chr2	+	201927811	201928774	NR_002944,NM_031157,NM_002136,NM_001011725,NM_001011724,ENST00000444945,ENST00000424481,ENST00000406078,	TACAAAAATCAGTCTTCAAATTTTGGACCCGTGAAGGGAGGAAATTTTGGAGGCAGAAGC	intronic antisense	NM_173822	FAM126B	hypothetical protein LOC285172	-	201838440	201936392
ASHG19A3A029370	3.80091	1.92634	3.80091	up	547.089	1814.94	8.96289	10.8892	noncoding	uc001ekp.3	AL050141	UCSC_knowngene	709	chr1	+	144212642	144215424	uc001erc.3,uc001ejz.1,NM_183372,NM_173638,NM_017940,NM_015383,NM_015383,NM_001170755,NM_001102663,NM_001101663,NM_001039703,NM_001039703,NM_001039703,NM_001039703,NM_001039703,NM_001039703,NM_001039703,NM_001039703,NM_001039703,NM_001039703,NM_001039703,NM_001039703,AX747492,	ATAGATGTTATTCGACTCCTTCAGGTTATCTTGAACTGCCTGACTTAGGCCAGCCCTACA	intergenic
ASHG19A3A049362	2.3024	1.20314	2.3024	up	127.056	270.033	6.87975	8.08288	noncoding	NR_029383	LOC100288730	RefSeq_NR	2211	chr13	-	28710980	28713311		GGAACATCATTGAATTCAGACAGATCTGGATTGAAACAGATTAAAGTGCCTACACTTTAA	natural antisense	NM_175854	PAN3	PAB-dependent poly(A)-specific ribonuclease	+	28712642	28869475
ASHG19A3A033553	4.20102	2.07074	4.20102	up	416.208	1537.23	8.56613	10.6369	noncoding	AK129699		misc_RNA	1999	chr7	-	130614967	130616965		CCACCTGCCAAACAGTTAACCCTGAACAAGTCATGTCAATTTATTTTGCTTTTAAAAAAG	intergenic
ASHG19A3A027813	4.64307	2.21508	4.64307	up	827.678	3480.19	9.56035	11.7754	noncoding	AK124428		misc_RNA	2490	chr5	-	180240052	180242541		AAACGCCTTCAACAATGAGCACACCTTTCGACACGAGTTCCCAGACTTTATCCTAAAAAA	intergenic
ASHG19A3L0002457	2.10966	1.07701	2.10966	up	127.785	250.324	6.89084	7.96785	noncoding	AW086055	lincRNA-PRRC2C	lincRNA	378	chr1	-	171562278	171562866		CAGGTTCTGCAGTCATCTGAATAAAATTATAGAGACATCCAGCACACTCCATTTAAAAAA	natural antisense	NM_015172	PRRC2C	protein PRRC2C	+	171454665	171562650
ASHG19A3A046217	3.03998	1.60406	3.03998	up	363.951	949.517	8.37962	9.98368	noncoding	ENST00000474589	RP11-713P14.1	Ensembl	881	chr11	+	23541867	23542748		TATCAGGAATTCATTGACCATCTTGTCAAGACCTATGCCAGAGTCTCTGTGGAGAGGACT	intergenic
ASHG19A3A047900	2.16761	1.1161	2.16761	up	899.106	1711.41	9.68215	10.7983	noncoding	ENST00000393111	AC023161.2	Ensembl	780	chr12	-	94914865	94915647	NM_014886,ENST00000457472,	ATTGGTCTGAAGGCTAAGCTTTACCATAAACAGCGCCATGCTGAGAAAATACAAATGAAA	intergenic
ASHG19A3A012948	2.7915	1.48104	2.7915	up	274.079	664.441	7.9713	9.45234	noncoding	NR_024330	NCRNA00085	RefSeq_NR	2017	chr19	+	52196592	52208442		CTGGGCGAGCTGCTGGCCAGGCCCGAGGCTCTGACGCCCAGCAATCTGTTCCTGCTTGCA	intergenic
ASHG19A3A034345	3.16853	1.66382	3.16853	up	96.5337	281.178	6.48284	8.14666	noncoding	AK026818		misc_RNA	2117	chr7	+	55277223	55279319		TTAAAAGATGATGGAAAGCACATTTAGCTTGGTCTGAGGCAGGTTCTGTTGGGGCAGTGT	intergenic
ASHG19A3A024933	2.71372	1.44027	2.71372	up	855.733	2036.12	9.61275	11.053	noncoding	ENST00000495104	RP11-366M4.2	Ensembl	446	chr4	-	165841769	165842215		CTGCAAAAAGATCCTTGAAAAGGAAGCCAAATCTCGCCAAGTAGGAAAAGAAAAGGGCAA	intergenic
ASHG19A3A047366	2.72761	1.44764	2.72761	up	135.865	338.045	6.97586	8.4235	noncoding	AK095308		misc_RNA	2715	chr12	-	14889902	14892617		CACAAATCTAAGGATCACTCTGAGCCACAGTTTCTTTATCCTATTCTGAAATCTCTTTAA	intergenic
ASHG19A3A042597	2.03376	1.02415	2.03376	up	2365.1	4460.75	11.0859	12.1101	noncoding	ENST00000405422	RP11-460H18.1	Ensembl	495	chr10	-	32477250	32477745	NM_021130,ENST00000435399,ENST00000358455,ENST00000309884,ENST00000244636,BC001224,	ATGGCAAGCATGTGGTCTTTGGCAAAGTGAAAGAAGGCATGAATATTATGGAGGCCATGG	intergenic
ASHG19A3A036461	3.1907	1.67387	3.1907	up	367.323	1010.53	8.39616	10.07	noncoding	uc003xel.1	DKFZp451J181	UCSC_knowngene	806	chr8	+	25272425	25273231		CATGGACAGTTAGGAAGATGTGCATTGAAGTAGGAAAATTTTGTTCAGATTTGCTGTTAT	intergenic
ASHG19A3A030678	2.02092	1.01501	2.02092	up	1198.03	2127.51	10.0973	11.1123	noncoding	ENST00000407763	RP11-365H23.1	Ensembl	661	chr6	-	149433147	149433808	NM_198220,NM_003092,	GATGCTTTACAGGGATTTAAGATCACAACATCCCATGCTATGAAGATCACCTATGCCAAG	intergenic
ASHG19A3A007506	2.08109	1.05734	2.08109	up	644.162	1154.09	9.20036	10.2577	noncoding	NR_027355	LOC645166	RefSeq_NR	670	chr1	+	148928285	148951595	NR_027238,	CTCCAAGACCTCATCAACAATTAAGACTCTTTGGCAGTTGCACTGGGTACTGGCTGAGTT	intergenic
ASHG19A3A038936	2.75878	1.46403	2.75878	up	50.2266	135.568	5.54083	7.00486	noncoding	NR_027341	C9orf44	RefSeq_NR	2000	chr9	+	94903748	94921890		CAGGGAAGGGAAGGTAATTGAAAGTTTACAAAAACAAAACCCCATTCACATTCTTAAAGT	intergenic
ASHG19A3A017029	2.69939	1.43263	2.69939	up	214.272	514.964	7.62298	9.05562	noncoding	ENST00000417147	AC009302.2	Ensembl	390	chr2	+	222808941	222809331	NM_032338,	CATGGACAGTACCCAATATGGATGAACCAAAGGCAAAGAAAAAGGCTAAAGGCAAAGCGA	intergenic
ASHG19A3A008039	2.67336	1.41866	2.67336	up	38.8775	102.922	5.16728	6.58594	noncoding	uc002gva.1	BC058012	UCSC_knowngene	771	chr17	-	19059039	19062424		ACTTGACAAGGCCTTGGAAACTTGGTCTCTGCAGCAGCAACCGGATTTCAGCCTGGGCCT	natural antisense	NM_001129778	GRAPL	GRB2-related adapter protein-like	+	19030781	19062148
ASHG19A3A021015	2.56836	1.36085	2.56836	up	54.3412	135.925	5.64834	7.00919	noncoding	ENST00000444020	RP11-1029M24.1	Ensembl	547	chr3	-	48162158	48162705		AGAGAGTAATGCTGAATTTAAAGGTTTCGATGTAGATTCTCTGGTCATTTGAGGATATCC	intergenic
ASHG19A3A009077	3.12837	1.64541	3.12837	up	38.7111	119.092	5.16227	6.80768	noncoding	ENST00000434300	RP5-1011O1.2	Ensembl	396	chr1	-	192486768	192536347		CAATTATTCTCCTGTTTTATCCAAATTATTCCCTTCTGCAAGACTCACATCAAGTACGAT	intergenic
ASHG19A3A046765	3.00706	1.58836	3.00706	up	229.225	604.361	7.71421	9.30257	noncoding	ENST00000318509	RP4-597J3.1	Ensembl	588	chr1	-	64254385	64254975		TCCAGGTCAAGAAGGAGGAAATCATCAAGACCTTGTCCAAGGAGGAAGAGACAAGGAAAT	intronic antisense	NM_005012	ROR1	tyrosine-protein kinase transmembrane receptor	+	64239689	64644707
ASHG19A3A046765	3.00706	1.58836	3.00706	up	229.225	604.361	7.71421	9.30257	noncoding	ENST00000318509	RP4-597J3.1	Ensembl	588	chr1	-	64254385	64254975		TCCAGGTCAAGAAGGAGGAAATCATCAAGACCTTGTCCAAGGAGGAAGAGACAAGGAAAT	intronic antisense	NM_001083592	ROR1	tyrosine-protein kinase transmembrane receptor	+	64239689	64609052
ASHG19A3A034837	3.15571	1.65796	3.15571	up	2387.81	7022.99	11.0961	12.7541	noncoding	ENST00000471747	RP11-395B7.7	Ensembl	767	chr7	+	100740414	100741181		ACCCAGTGTGCTGTAAACTCTTCAGTTCCTTTGGTTATGGATTTTGTATCTTTTCTGTGT	intergenic
ASHG19A3A021994	2.93572	1.55371	2.93572	up	90.1453	245.574	6.38688	7.94059	noncoding	ENST00000423357	RP11-4B14.1	Ensembl	805	chr3	-	181222862	181223667		GCATTATTAAGGGGAAGGCAAGACTGGGATATTTATGAAGACCTGTACCACTGTTGCCTT	intergenic
ASHG19A3A000162	2.87966	1.5259	2.87966	up	1036.1	2655.5	9.88627	11.4122	noncoding	ENST00000423774	AC027612.6	Ensembl	218	chr2	-	91842940	91843529	NR_027355,NR_027354,NR_027238,NM_002339,NM_001013255,NM_001013254,NM_001013253,	GTCTGCGGCCAAGACTCCATCCTGCAGGATATTGTGGCTGGAGACATGAGCAAGAAAAGC	intergenic
ASHG19A3A032052	2.02882	1.02064	2.02882	up	127.928	241.312	6.89216	7.9128	noncoding	AK055024		misc_RNA	2178	chr6	+	127664573	127666751		TTGGGAAAATATCCAAGTTAAACTCTATATAGTGGGGTAGGTGGACAATGAAAGATAAGT	natural antisense	NM_001105544	ECHDC1	enoyl-CoA hydratase domain-containing protein 1	-	127609856	127664754
ASHG19A3A032052	2.02882	1.02064	2.02882	up	127.928	241.312	6.89216	7.9128	noncoding	AK055024		misc_RNA	2178	chr6	+	127664573	127666751		TTGGGAAAATATCCAAGTTAAACTCTATATAGTGGGGTAGGTGGACAATGAAAGATAAGT	natural antisense	NM_001002030	ECHDC1	enoyl-CoA hydratase domain-containing protein 1	-	127609856	127664754
ASHG19A3A032052	2.02882	1.02064	2.02882	up	127.928	241.312	6.89216	7.9128	noncoding	AK055024		misc_RNA	2178	chr6	+	127664573	127666751		TTGGGAAAATATCCAAGTTAAACTCTATATAGTGGGGTAGGTGGACAATGAAAGATAAGT	natural antisense	NM_001105545	ECHDC1	enoyl-CoA hydratase domain-containing protein 1	-	127609856	127664754
ASHG19A3A032052	2.02882	1.02064	2.02882	up	127.928	241.312	6.89216	7.9128	noncoding	AK055024		misc_RNA	2178	chr6	+	127664573	127666751		TTGGGAAAATATCCAAGTTAAACTCTATATAGTGGGGTAGGTGGACAATGAAAGATAAGT	natural antisense	NM_018479	ECHDC1	enoyl-CoA hydratase domain-containing protein 1	-	127609856	127664754
ASHG19A3L0002260	4.34392	2.119	4.34392	up	79.947	319.561	6.21248	8.33148	noncoding	chrX:128828944-128841419+	lincRNA-XPNPEP2-2	lincRNA	12476	chrX	+	128828944	128841419		ATTTTCTCTTTTCTTTTTAATAGTGTTGGTGGTTGTGCCTGGAGGTGAGACAGGGGAGGG	intergenic
ASHG19A3A022878	2.16504	1.1144	2.16504	up	1442.04	2779.04	10.3651	11.4795	noncoding	ENST00000486071	RP11-215L17.1	Ensembl	528	chr3	+	96338147	96338675		AGAAGATGAAGTCTTTAGGGGAGATTGTCTACTGTTGGCAGGTTTTGAGACGTCCTTCCT	intergenic
ASHG19A3A015578	3.17525	1.66687	3.17525	up	217.309	605.828	7.6409	9.30777	noncoding	ENST00000423354	AC010883.5	Ensembl	398	chr2	+	43456711	43460533		TTGACTGGTTTGCCCTTTCCTTGGAAAGCAGATCTCTTGGGCACAAGACACATCCTAGAG	natural antisense	NM_001083953	THADA	thyroid adenoma-associated protein	-	43457974	43823113
ASHG19A3A015578	3.17525	1.66687	3.17525	up	217.309	605.828	7.6409	9.30777	noncoding	ENST00000423354	AC010883.5	Ensembl	398	chr2	+	43456711	43460533		TTGACTGGTTTGCCCTTTCCTTGGAAAGCAGATCTCTTGGGCACAAGACACATCCTAGAG	natural antisense	NM_022065	THADA	thyroid adenoma-associated protein	-	43457974	43823185
ASHG19A3A020485	2.13857	1.09664	2.13857	up	403.063	745.956	8.52504	9.62168	noncoding	AL831862		RNAdb	3110	chr22	+	40728716	40731781	NM_015088,NM_001162501,NM_001024843,	TAGGCACTTTAGAGGTGCACTTGCATGGCAGGCTGGGCCCCCTTTTCTATATTTTATTTT	exon sense-overlapping	NM_001024843	TNRC6B	trinucleotide repeat-containing gene 6B protein	+	40440820	40731812
ASHG19A3A020485	2.13857	1.09664	2.13857	up	403.063	745.956	8.52504	9.62168	noncoding	AL831862		RNAdb	3110	chr22	+	40728716	40731781	NM_015088,NM_001162501,NM_001024843,	TAGGCACTTTAGAGGTGCACTTGCATGGCAGGCTGGGCCCCCTTTTCTATATTTTATTTT	exon sense-overlapping	NM_001162501	TNRC6B	trinucleotide repeat-containing gene 6B protein	+	40573928	40731812
ASHG19A3A020485	2.13857	1.09664	2.13857	up	403.063	745.956	8.52504	9.62168	noncoding	AL831862		RNAdb	3110	chr22	+	40728716	40731781	NM_015088,NM_001162501,NM_001024843,	TAGGCACTTTAGAGGTGCACTTGCATGGCAGGCTGGGCCCCCTTTTCTATATTTTATTTT	exon sense-overlapping	NM_015088	TNRC6B	trinucleotide repeat-containing gene 6B protein	+	40573928	40731812
ASHG19A3A028734	3.49102	1.80365	3.49102	up	149.476	472.187	7.11676	8.92041	noncoding	ENST00000505315	RP11-425E13.2	Ensembl	124	chr5	+	124601220	124601344	ENST00000452520,	AGAGATGTGCAATAGCACTGCTGCAGATGACAAGCAGCCTTATGAAAAGAAGGCTGCAAA	intergenic
ASHG19A3A013472	2.05626	1.04002	2.05626	up	4313.86	8667.69	11.9931	13.0331	noncoding	ENST00000404956	AL121652.3	Ensembl	846	chr2	-	32047659	32048505	NM_199187,NM_000224,	CAGATAGTGGATGGCAAAGTGGTGTCTGAGACCAATGACACCAAAATTCTGAGGCATTAA	intergenic
ASHG19A3A052768	3.26834	1.70856	3.26834	up	545.505	1567.01	8.95845	10.667	noncoding	uc001zlf.1	AL832909	UCSC_knowngene	2234	chr15	+	40616680	40618914		GCTGTGAACATGACCAGAGACATTATTTATAATTCAGCCATTTAAGATATACCTGTACTC	intergenic
ASHG19A3A007629	3.14839	1.65461	3.14839	up	86.5885	252.955	6.33001	7.98462	noncoding	NR_028102	THUMPD2	RefSeq_NR	2345	chr2	-	39963199	40006416		TCTCGAGCACGACTGGGCCTGACAGTGGGGCTGGTGCATTTGTTTTAGATCCAATGTGTG	exon sense-overlapping	NM_025264	THUMPD2	THUMP domain-containing protein 2	-	39963199	40006416
ASHG19A3A045606	2.46734	1.30296	2.46734	up	1026.61	2218.44	9.86757	11.1705	noncoding	uc001pfj.2	CR603982	UCSC_knowngene	5264	chr11	-	94898705	94903969		GGAACTGTTAGTGAGTCAAGACAAACACATCTGAAATAAAGGAACTGTGTATTAACATGT	intergenic
ASHG19A3A045855	2.49741	1.32044	2.49741	up	88.9296	207.733	6.36627	7.68671	noncoding	ENST00000476981	RP11-712L6.1	Ensembl	259	chr11	-	126148214	126148473		GTAATCTGGGAAAAAGTAACTTGGGTTCACGGAAACAGTGGCATGGTTTATGCCAAATTC	intergenic
ASHG19A3A000046	3.20556	1.68058	3.20556	up	133.162	384.93	6.94884	8.62941	noncoding	BC115358		NRED	636	chr13	+	77502199	77502834	NR_026983,ENST00000426582,	TGAGACAAAGCAGCTGACAGAAATGCTACTCAGCATCGATCATAAACCAGTGCTGCAGAT	intergenic
ASHG19A3A054289	2.31402	1.2104	2.31402	up	400.272	798.391	8.51538	9.72578	noncoding	AK055529		misc_RNA	2148	chr16	+	11034575	11036876		ATCCTAGAGTTAAGGAACACCTGAATAAAGAGATTCCGAGGTAGTTCAGATCTTCAACCA	natural antisense	NM_014015	DEXI	dexamethasone-induced protein	-	11022747	11036257
ASHG19A3A018060	2.57423	1.36414	2.57423	up	3213.56	7922.1	11.5401	12.9043	noncoding	ENST00000414718	PA2G4P2	Ensembl	1200	chr20	+	12360703	12361903		TAAATTTACAATTCTGCTCATGCCCAATGGCCCCATGCAGAAAACCAGTGGTCCCTTCAA	intergenic
ASHG19A3A043065	2.50514	1.32489	2.50514	up	116.334	268.942	6.75122	8.07612	noncoding	NR_024397	LOC728190	RefSeq_NR	825	chr10	-	88998425	89102315		GCTATTGAGGCAACATGAGATGGACATTAATCGACTAAGTAAAAAACAGATTTCTTGAAG	intergenic
ASHG19A3L0000869	2.42457	1.27773	2.42457	up	266.681	567.382	7.92707	9.2048	noncoding	DN604327	lincRNA-CDH11-1	lincRNA	160	chr16	-	65261807	65261927		TTCCCCAGCCTGGACAACACACTTCAAGAGTAAAACTTTGCTGTAAATAAATGAATCAAC	intergenic
ASHG19A3A017120	2.79997	1.48541	2.79997	up	33.395	93.4326	4.94964	6.43505	noncoding	ENST00000420211	RP11-422P22.1	Ensembl	491	chr1	+	18712322	18715008		AAAGCCCTTCCTTAAATCCTTTAAAGCCTAGGCTTAGGGGATTGGGCTCCTGCTTTAAGA	intergenic
ASHG19A3A028457	2.53774	1.34354	2.53774	up	2642.49	6237.08	11.2509	12.5944	noncoding	ENST00000399128	SHFM1P	Ensembl	213	chr5	+	81188309	81188547		AATTGGGATGATGACAATGTAGAGGATGACTTCTCTAATCAGTTACGTGATGTTCTTTCT	intergenic
ASHG19A3A037324	2.13061	1.09127	2.13061	up	793.183	1477.18	9.4987	10.59	noncoding	ENST00000436071	RP11-327L3.4	Ensembl	725	chr9	-	35943206	35943931	NM_001029891,	TATTCCCATCGTCTATGAATTGGACAAGAACTTGAAGCCCATCAAGCCCATGCAGTTCCT	intergenic
ASHG19A3A014551	2.4462	1.29054	2.4462	up	12645.5	42690.4	13.5852	14.8758	noncoding	uc002ubv.3	BC073897	UCSC_knowngene	618	chr2	-	162196028	162196646	NM_198530,NM_001008529,	TGGCTTGGATCTCTGTATTCAGCCTTTGTTCAGTCCAATAAACTTTGAGTAGATGATCTC	intronic antisense	NM_005805	PSMD14	26S proteasome non-ATPase regulatory subunit 14	+	162164785	162268226
ASHG19A3A045291	2.59484	1.37565	2.59484	up	78.5753	193.016	6.19121	7.56686	noncoding	ENST00000413752	RP4-666O22.1	Ensembl	448	chr1	-	47963563	47964011		TCTTGCCAAGAGAATTAATGTGCATATTGAGCACTCTAAGAGCCAAAATAGCTTCCTGAA	intergenic
ASHG19A3A012450	2.64644	1.40405	2.64644	up	7137.29	22513.2	12.7186	14.1227	noncoding	ENST00000487216	CTD-3233P19.2	Ensembl	318	chr19	+	21416136	21416454		TAAAAGATGCAAGCATTTTGAACTGGGAGTAGATAAGAGAAAGGGCCAAGTGATCCAGTT	intergenic
ASHG19A3A033399	5.239	2.38929	5.239	up	1418.96	6873.98	10.3357	12.725	noncoding	ENST00000449443	RP11-95P9.1	Ensembl	316	chr7	-	113937168	113937484		AACGGGCCCTCAAGTTTCATCGAGAAAAGGGTGGGGACACATCCACGCCAAGAGGAAGCA	intergenic
ASHG19A3A025440	2.25826	1.17521	2.25826	up	43.3447	97.4805	5.32477	6.49998	noncoding	ENST00000508931	RP11-333E13.3	Ensembl	1278	chr4	+	40021859	40023137		AAGAACCACAAAGATTAAGTAAAAGGTCTACAAGCTCAGACTGCCAGCTCTGGGTTGACC	intergenic
ASHG19A3A014667	5.2791	2.40029	5.2791	up	85.1896	407.079	6.30613	8.70642	noncoding	uc002ukl.1	AX747372	UCSC_knowngene	641	chr2	-	176992554	176993195		GTCCTTCAATCTTGCAAATGCCCAATTAAAAGATTATTATTGTCAATAAAGCCTTGGAGC	intergenic
ASHG19A3A047487	3.27321	1.7107	3.27321	up	234.017	663.549	7.74013	9.45083	noncoding	ENST00000479116	RP11-73B8.1	Ensembl	460	chr12	-	43954640	43955100	ENST00000497298,ENST00000418441,ENST00000402666,	AAATGATCAGAAAAAGAAGGAAGCCAAGGAGAAAGGTACCTGGGTTCAACTGAAGTGCCA	intergenic
ASHG19A3A036791	2.61144	1.38484	2.61144	up	1028.26	2365.38	9.87242	11.2573	noncoding	ENST00000495884	KB-1967D12.1	Ensembl	581	chr8	+	99794276	99794857		TACCTGAAGGTAAAGGGGAGTGTGTTCAAAAACAGGTGGATTCTCATGGAACACATCCAC	intronic antisense	NM_006281	STK3	serine/threonine-protein kinase 3	-	99466860	99837909
ASHG19A3A040180	2.4866	1.31417	2.4866	up	205.631	461.142	7.56944	8.88362	noncoding	ENST00000456301	RP3-341D10.4	Ensembl	3216	chrX	-	100258820	100262962		GAAAGTTTTAAAATCTTTTTCTCCAACTTGGGCAATATGGCAAAACCCTATCTCCACAAA	intergenic
ASHG19A3A010611	6.59667	2.72174	6.59667	up	121.812	704.578	6.81956	9.5413	noncoding	AK023058		NRED	2327	chr1	-	208258444	208260781		TTGGTTTTGTTTTCCAAAGCAACATGGCATTCACGCAGGGCCTGGTAATGAAATGAGATT	intron sense-overlapping	NM_025179	PLXNA2	plexin-A2 precursor	-	208195587	208417665
ASHG19A3A018479	2.24282	1.16531	2.24282	up	77.8181	166.953	6.17276	7.33807	noncoding	ENST00000437350	RP5-843L14.1	Ensembl	298	chr20	+	55171365	55173677		TTCTCTTGTGCCCCAATTACCACATGCGTCATGGGGAGAAGAGCTTGAACCCCCCAGAGG	intergenic
ASHG19A3A030926	3.59251	1.84499	3.59251	up	1246.25	4102.53	10.1559	12.0009	noncoding	ENST00000405257	RP11-620A17.1	Ensembl	1317	chr6	+	4702696	4704013	NM_002802,	TCTAAAGAAAATGTTCTTTATAAGAAACAGGAAGGCACCCCTGAGGGGCTGTCTCTCTAG	intergenic
ASHG19A3A020172	3.66125	1.87234	3.66125	up	92.8827	313.249	6.4311	8.30344	noncoding	ENST00000426066	LL22NC03-80A10.6	Ensembl	1776	chr22	+	22657588	22677203	NR_027293,NM_014753,ENST00000443754,ENST00000428213,ENST00000417301,ENST00000416720,	AAATTTGAAGGTGCTGTGATTCGAACTGTCAGTGGGATAAGGGGGCAGATCAAGAAAGCA	intergenic
ASHG19A3A011487	4.28618	2.09969	4.28618	up	163.334	620.447	7.24298	9.34267	noncoding	ENST00000504363	AC011526.1	Ensembl	3467	chr19	-	41960078	42006554		TCTCTTCTTCTAAGCAATCAACTTCAATTCCTTGTATAACCCACAGTATAAAAGGGCTTT	intergenic
ASHG19A3A043254	2.48961	1.31592	2.48961	up	915.815	1980.58	9.70862	11.0245	noncoding	ENST00000438729	RP11-753C18.8	Ensembl	315	chr10	-	104647630	104647945		GATCACTGTGACTTCTGAGGTACCTTTTTCCAAAAGGTATTTGAAATATCTCACCAAAAA	intronic antisense	NM_020682	AS3MT	arsenite methyltransferase	+	104629209	104661655
ASHG19A3A045521	2.57768	1.36607	2.57768	up	604.233	1354.36	9.1133	10.4794	noncoding	AK096617		misc_RNA	3181	chr11	-	77372822	77376003		CCAGAACATAGTTATTGGGGAACTTCATGGCTCAAAACCTTCTGAATCATTTAACTTATT	intergenic
ASHG19A3A030424	10.0016	3.32216	10.0016	up	84.8039	745.085	6.29847	9.62063	noncoding	NR_027484	FCGR1C	RefSeq_NR	1338	chr1	+	149369293	149378295	NM_000566,AK291502,	TACTAAATACTAACTGCTAGAAGAGAAGACTCTGGGTTATACTGGTGCGAGGCTGCCACA	intergenic
ASHG19A3A033554	5.00494	2.32335	5.00494	up	171.154	749.496	7.30752	9.63087	noncoding	BC046210		misc_RNA	1233	chr7	-	130619611	130620827		TCCAATAGAAGATTAAATGGCTGTGGAGTCTAGAGGTTTTTTCCTTCGGTGTGGGCATCA	intergenic
ASHG19A3A041782	2.32706	1.21851	2.32706	up	84.5685	187.124	6.29428	7.51278	noncoding	ENST00000502880	RP11-143H17.1	Ensembl	755	chrX	+	154365385	154384778		ATGTTCTTTCTGAAAAAACTAGGAGCAGTAGCTGGGTGGTGGTGTTCAAAGCCCTGGTTA	intergenic
ASHG19A3A022401	2.73855	1.45341	2.73855	up	222.567	539.608	7.67338	9.12679	noncoding	AK021606		misc_RNA	1685	chr3	+	30739152	30740837		CTTGTTCATTTGAGGCCTTCCCAAAGATGACTGACATTTTCACAAATTTTATTTGGTTTC	intergenic
ASHG19A3A037495	2.87025	1.52117	2.87025	up	151.582	392.304	7.1361	8.65727	noncoding	ENST00000443754	RP11-236F9.4	Ensembl	1120	chr9	-	67327774	67334983	ENST00000421917,ENST00000417301,	ATGGAAGACAAAGGCTTCTAAAGTATACGCCACAGCACATCCATTGTGGAGCAGCCTTTT	intergenic
ASHG19A3A026207	2.39166	1.25801	2.39166	up	132.667	291.447	6.94416	8.20217	noncoding	ENST00000512179	RP11-489P20.1	Ensembl	511	chr4	+	156927629	156928140		AGGTGAAATCCATCAAATAATTGGATGACCACAGTGACCAACTTGCACAAGACGGGAGCA	intergenic
ASHG19A3A052723	2.14512	1.10106	2.14512	up	1073.62	2020.35	9.944	11.0451	noncoding	uc001zgs.1	BC037839	UCSC_knowngene	1279	chr15	+	32828914	32872810		AATCACCGTGTGTTACTGGCACAGATGCATCGGCTAGTGAAGAAAGAAGACATTCAAACT	intergenic
ASHG19A3A050434	2.5852	1.37027	2.5852	up	116.462	277.871	6.75252	8.12279	noncoding	ENST00000415285	RP11-397O8.4	Ensembl	429	chr13	+	102369913	102375456		ACCACTGCAGTTTGCCCATTTCTGTTTTCCCTGAAGTAAAGCAATTCCATTGAGACAGAA	natural antisense	NM_175929	FGF14	fibroblast growth factor 14 isoform 1B	-	102373204	103054124
ASHG19A3A050434	2.5852	1.37027	2.5852	up	116.462	277.871	6.75252	8.12279	noncoding	ENST00000415285	RP11-397O8.4	Ensembl	429	chr13	+	102369913	102375456		ACCACTGCAGTTTGCCCATTTCTGTTTTCCCTGAAGTAAAGCAATTCCATTGAGACAGAA	natural antisense	NM_004115	FGF14	fibroblast growth factor 14 isoform 1A	-	102373204	102568995
ASHG19A3A027443	3.88311	1.95721	3.88311	up	228.419	765.817	7.70953	9.66674	noncoding	CR596214		misc_RNA	748	chr5	-	137086123	137086869		GTGCCATGCTTGAATGTATTTTGACGGATTAGCAAAATAAAAGTGAACCTCCTATTTTTC	intergenic
ASHG19A3A049623	2.59247	1.37433	2.59247	up	4178.79	11295.7	11.9466	13.3209	noncoding	ENST00000448133	RP11-521H3.2	Ensembl	1210	chr13	-	61211021	61212231		AGAAGACAAGAGGACTCTTCGAGACATCAGGACCTTCTACAACACCTCCATTGAGGAAAT	intergenic
ASHG19A3A027013	2.16688	1.11562	2.16688	up	293.793	564.113	8.07847	9.19409	noncoding	AK026295		NRED	1309	chr5	-	79434702	79435990	NM_001174072,	GAAGTTCTCTCAGGTAAAGAAAGCTTACAGCAGATTTGTAATATATGTCTGGAGAGCTAT	intron sense-overlapping	NM_178276	SERINC5	serine incorporator 5 isoform 2	-	79407049	79551898
ASHG19A3A027013	2.16688	1.11562	2.16688	up	293.793	564.113	8.07847	9.19409	noncoding	AK026295		NRED	1309	chr5	-	79434702	79435990	NM_001174072,	GAAGTTCTCTCAGGTAAAGAAAGCTTACAGCAGATTTGTAATATATGTCTGGAGAGCTAT	intron sense-overlapping	NM_001174071	SERINC5	serine incorporator 5 isoform 3	-	79407049	79551898
ASHG19A3A027013	2.16688	1.11562	2.16688	up	293.793	564.113	8.07847	9.19409	noncoding	AK026295		NRED	1309	chr5	-	79434702	79435990	NM_001174072,	GAAGTTCTCTCAGGTAAAGAAAGCTTACAGCAGATTTGTAATATATGTCTGGAGAGCTAT	exon sense-overlapping	NM_001174072	SERINC5	serine incorporator 5 isoform 1	-	79434549	79551898
ASHG19A3A033190	3.3826	1.75813	3.3826	up	34.1967	114.376	4.98945	6.74759	noncoding	uc003uoj.2	AK095764	UCSC_knowngene	2077	chr7	-	96594885	96596962	ENST00000430027,	GGATGAAAGAATTAGGAGTTCTGTCTCCTTGTATCTAATTGCATGTTTCATCTTTCTTGT	intergenic
ASHG19A3A026908	2.3852	1.25411	2.3852	up	2189.88	4863.74	10.9747	12.2288	noncoding	NR_024438	LOC648740	RefSeq_NR	1988	chr1	+	104112025	104114006		TGAGAACATTAGGCCCCAGCAATATATCATTGTGTATGGAAAAATAAAAGTGCTGCCAGA	intron sense-overlapping	NM_020978	AMY2B	alpha-amylase 2B precursor	+	104097321	104122149
ASHG19A3A045056	2.94658	1.55904	2.94658	up	284.869	727.782	8.02914	9.58818	noncoding	ENST00000395877	AC131263.2	Ensembl	894	chr11	-	33097108	33098006		TGTATCCACTGTATCCAGCACACTATCCTTGAACATGGCCATCTTTGCTTCTGGATGCTT	intergenic
CUST_623_PI426073487	2.22662	1.15485	2.22662	up	2732.81	5717.05	11.2999	12.4548	noncoding	uc.144-	uc.144	UCR	205	chr4	-	83346664	83346869		TGTCCTGTGGTATGGTCTCTTCCAACTTCATGTACCAGCGTAAAGATTAAAGTGGAAAAC	intron sense-overlapping	NM_001207000	HNRPDL	heterogeneous nuclear ribonucleoprotein D-like	-	83343716	83351378
CUST_623_PI426073487	2.22662	1.15485	2.22662	up	2732.81	5717.05	11.2999	12.4548	noncoding	uc.144-	uc.144	UCR	205	chr4	-	83346664	83346869		TGTCCTGTGGTATGGTCTCTTCCAACTTCATGTACCAGCGTAAAGATTAAAGTGGAAAAC	intron sense-overlapping	NM_031372	HNRPDL	heterogeneous nuclear ribonucleoprotein D-like	-	83343716	83351378
ASHG19A3A045303	2.84628	1.50908	2.84628	up	1636.47	4271.47	10.5457	12.0548	noncoding	uc001nxj.1	CR936784	UCSC_knowngene	3770	chr11	-	63391555	63395325		CCTTGCCTTTGAGTGGCTTTGAAACTTAATATAGTTTTTAAAAAGTGCAATGGGATGAGA	intergenic
ASHG19A3A021776	5.16679	2.36927	5.16679	up	123.334	568.436	6.83788	9.20714	noncoding	AK056150		NRED	2389	chr1	+	45274267	45280968		AAGTCCTGGAACATCCCATTGACCTCCAGGACAAAATTCAATCTATTTCACTTTCAGGGC	exon sense-overlapping	NM_001136537	BTBD19	BTB/POZ domain-containing protein 19	+	45274153	45279801
ASHG19A3A042042	2.40164	1.26402	2.40164	up	368.91	765.778	8.40249	9.66652	noncoding	NR_028062	PRKY	RefSeq_NR	7240	chrY	+	7142012	7249586		TGTCTTAATGCATTTGGATACTTTGGGGTGTGTGCCTGTCTGTGTGTGTGTCTTGGTGAA	intergenic
ASHG19A3A042934	2.25977	1.17618	2.25977	up	13835.3	44934.4	13.7565	14.9327	noncoding	ENST00000428039	RP11-522H2.3	Ensembl	894	chr10	-	74677398	74678292	NM_199185,NM_013269,NM_002520,NM_001004419,ENST00000458237,ENST00000449818,ENST00000428821,ENST00000396690,ENST00000393516,	TTATGTGAAGAATTGCTTCCGGATGACTGACCAAGAGGCTATTCAAGATCTCTGGCAGTG	intronic antisense	NM_152635	OIT3	oncoprotein-induced transcript 3 protein	+	74653338	74692787
ASHG19A3A045588	2.59864	1.37775	2.59864	up	197.372	462.837	7.51102	8.88878	noncoding	uc001pdl.1	AK093898	UCSC_knowngene	2316	chr11	-	92877340	92879656		GCACAAGTATATGCAGACACACACACAAATCAGTAATCTATGTGAACTAGATACTAATAC	intergenic
ASHG19A3A019301	12.1287	3.60035	12.1287	up	89.6881	947.293	6.37932	9.97967	noncoding	AF086547		misc_RNA	334	chr21	+	43724172	43724496		GCGGACTTGAACTTTGTTTTCTGAAATTAGATGCCATTTATGATGATGTGATGTCAATCA	intergenic
ASHG19A3L0000209	4.28318	2.09868	4.28318	up	789.44	3022.27	9.49216	11.5908	noncoding	AK097728	lincRNA-PRLHR-1	lincRNA	1798	chr10	-	120433633	120514558	NM_153810,	CTCAGGAGCTCTGTCACAAAGCTGTTCATGGAAGAGGATGTTGGACTTCTTACTTGCTTT	exon sense-overlapping	NM_153810	C10orf46	chromosome 10 open reading frame 46	-	120440493	120514758
ASHG19A3A025355	7.99839	2.99971	7.99839	up	364.984	2594.98	8.3839	11.3836	noncoding	ENST00000508873	AC006390.3	Ensembl	954	chr4	+	24773088	24774042		AAACCATGAAACCAAGGTTTCAGTAGCAGCAGTAGCTATGGCAGTGGGGGAAGATTTTAA	intergenic
ASHG19A3A007345	2.98406	1.57727	2.98406	up	145.836	391.774	7.07759	8.65486	noncoding	NR_024566	ZNF271	RefSeq_NR	4928	chr18	+	32870235	32890729		ACAGCGGTCCGGTGACCAAGTCGAGATGGTGAGAACAAGACCAAGATTGGAAAGCCAGCT	bidirectional	NM_001112734	ZSCAN30	zinc finger and SCAN domain-containing protein	-	32831022	32870196
ASHG19A3A007345	2.98406	1.57727	2.98406	up	145.836	391.774	7.07759	8.65486	noncoding	NR_024566	ZNF271	RefSeq_NR	4928	chr18	+	32870235	32890729		ACAGCGGTCCGGTGACCAAGTCGAGATGGTGAGAACAAGACCAAGATTGGAAAGCCAGCT	bidirectional	NM_001166012	ZSCAN30	zinc finger and SCAN domain-containing protein	-	32831022	32870196
ASHG19A3A007771	2.56312	1.3579	2.56312	up	122.302	287.93	6.82623	8.18414	noncoding	NR_033393	TROVE2	RefSeq_NR	2656	chr1	+	193028551	193055114		CCAGGGGGTCGGCTGCCAGGTACAGGACTTGCAATTGTGACCAAATATATTACAAAGGGC	exon sense-overlapping	NM_001042369	TROVE2	60 kDa SS-A/Ro ribonucleoprotein isoform 1	+	193029003	193060906
ASHG19A3A007771	2.56312	1.3579	2.56312	up	122.302	287.93	6.82623	8.18414	noncoding	NR_033393	TROVE2	RefSeq_NR	2656	chr1	+	193028551	193055114		CCAGGGGGTCGGCTGCCAGGTACAGGACTTGCAATTGTGACCAAATATATTACAAAGGGC	bidirectional	NM_001199263	UCHL5	ubiquitin carboxyl-terminal hydrolase isozyme L5	-	192987534	193028523
ASHG19A3A007771	2.56312	1.3579	2.56312	up	122.302	287.93	6.82623	8.18414	noncoding	NR_033393	TROVE2	RefSeq_NR	2656	chr1	+	193028551	193055114		CCAGGGGGTCGGCTGCCAGGTACAGGACTTGCAATTGTGACCAAATATATTACAAAGGGC	exon sense-overlapping	NM_001173524	TROVE2	60 kDa SS-A/Ro ribonucleoprotein isoform 2	+	193028551	193055115
ASHG19A3A007771	2.56312	1.3579	2.56312	up	122.302	287.93	6.82623	8.18414	noncoding	NR_033393	TROVE2	RefSeq_NR	2656	chr1	+	193028551	193055114		CCAGGGGGTCGGCTGCCAGGTACAGGACTTGCAATTGTGACCAAATATATTACAAAGGGC	exon sense-overlapping	NM_001042370	TROVE2	60 kDa SS-A/Ro ribonucleoprotein isoform 3	+	193029003	193060906
ASHG19A3A007771	2.56312	1.3579	2.56312	up	122.302	287.93	6.82623	8.18414	noncoding	NR_033393	TROVE2	RefSeq_NR	2656	chr1	+	193028551	193055114		CCAGGGGGTCGGCTGCCAGGTACAGGACTTGCAATTGTGACCAAATATATTACAAAGGGC	bidirectional	NM_001199262	UCHL5	ubiquitin carboxyl-terminal hydrolase isozyme L5	-	192987534	193028523
ASHG19A3A007771	2.56312	1.3579	2.56312	up	122.302	287.93	6.82623	8.18414	noncoding	NR_033393	TROVE2	RefSeq_NR	2656	chr1	+	193028551	193055114		CCAGGGGGTCGGCTGCCAGGTACAGGACTTGCAATTGTGACCAAATATATTACAAAGGGC	exon sense-overlapping	NM_004600	TROVE2	60 kDa SS-A/Ro ribonucleoprotein isoform 2	+	193029003	193055115
ASHG19A3A007771	2.56312	1.3579	2.56312	up	122.302	287.93	6.82623	8.18414	noncoding	NR_033393	TROVE2	RefSeq_NR	2656	chr1	+	193028551	193055114		CCAGGGGGTCGGCTGCCAGGTACAGGACTTGCAATTGTGACCAAATATATTACAAAGGGC	bidirectional	NM_015984	UCHL5	ubiquitin carboxyl-terminal hydrolase isozyme L5	-	192981495	193028523
ASHG19A3A007771	2.56312	1.3579	2.56312	up	122.302	287.93	6.82623	8.18414	noncoding	NR_033393	TROVE2	RefSeq_NR	2656	chr1	+	193028551	193055114		CCAGGGGGTCGGCTGCCAGGTACAGGACTTGCAATTGTGACCAAATATATTACAAAGGGC	bidirectional	NM_001199261	UCHL5	ubiquitin carboxyl-terminal hydrolase isozyme L5	-	192981495	193028523
ASHG19A3A007771	2.56312	1.3579	2.56312	up	122.302	287.93	6.82623	8.18414	noncoding	NR_033393	TROVE2	RefSeq_NR	2656	chr1	+	193028551	193055114		CCAGGGGGTCGGCTGCCAGGTACAGGACTTGCAATTGTGACCAAATATATTACAAAGGGC	exon sense-overlapping	NM_001173525	TROVE2	60 kDa SS-A/Ro ribonucleoprotein isoform 4	+	193029003	193060906
ASHG19A3A014449	2.35652	1.23666	2.35652	up	329.239	676.338	8.24163	9.47828	noncoding	AF086434		misc_RNA	662	chr2	-	144702501	144703153		GCTTCATAGTGGCTAAGATACTCCACACACAACTAGTACCCATAGATCTTTTCTCACTGA	intergenic
ASHG19A3A054865	2.34159	1.22749	2.34159	up	103.072	224.237	6.57576	7.80325	noncoding	BC012990		misc_RNA	3473	chr16	+	85625871	85629315		GACTTTGTAATGCCAGATCTTTTCTGTGTTTTAACATTCCTCCATCCATCATCTACCCAT	intergenic
ASHG19A3A040122	2.16749	1.11602	2.16749	up	92.0115	189.294	6.4165	7.53252	noncoding	ENST00000422893	RP1-223D17.1	Ensembl	483	chrX	-	82814837	82815320		ACACAATATGCTGTTCATGAAAATAGAGGGGCTGCATCTTGTTTATAGTCACCTTTTTAC	intergenic
ASHG19A3A036105	6.09538	2.60772	6.09538	up	178.147	944.203	7.36844	9.97616	noncoding	uc003yqp.1	AK023391	UCSC_knowngene	3475	chr8	-	124510129	124513604		CACTTTTCTTGCATGATGAACTGATTTTTTATAGTTGTTTGTACCAGACGGTGGCATATT	intergenic
ASHG19A3A040147	2.63389	1.39719	2.63389	up	2412.05	5864.32	11.1078	12.505	noncoding	ENST00000428832	RP13-136L2.1	Ensembl	1217	chrX	-	91368243	91369460	ENST00000422633,	AGAATCAGTCGAGGTGGACAGTTTGGCCGTAAAGATGTGGCTATTAACATGGTGACAGAA	intronic antisense	NM_001168361	PCDH11X	protocadherin-11 X-linked isoform f precursor	+	91090459	91878228
ASHG19A3A040147	2.63389	1.39719	2.63389	up	2412.05	5864.32	11.1078	12.505	noncoding	ENST00000428832	RP13-136L2.1	Ensembl	1217	chrX	-	91368243	91369460	ENST00000422633,	AGAATCAGTCGAGGTGGACAGTTTGGCCGTAAAGATGTGGCTATTAACATGGTGACAGAA	intronic antisense	NM_032969	PCDH11X	protocadherin-11 X-linked isoform d precursor	+	91089658	91878228
ASHG19A3A040147	2.63389	1.39719	2.63389	up	2412.05	5864.32	11.1078	12.505	noncoding	ENST00000428832	RP13-136L2.1	Ensembl	1217	chrX	-	91368243	91369460	ENST00000422633,	AGAATCAGTCGAGGTGGACAGTTTGGCCGTAAAGATGTGGCTATTAACATGGTGACAGAA	intronic antisense	NM_001168362	PCDH11X	protocadherin-11 X-linked isoform g precursor	+	91090459	91878228
ASHG19A3A040147	2.63389	1.39719	2.63389	up	2412.05	5864.32	11.1078	12.505	noncoding	ENST00000428832	RP13-136L2.1	Ensembl	1217	chrX	-	91368243	91369460	ENST00000422633,	AGAATCAGTCGAGGTGGACAGTTTGGCCGTAAAGATGTGGCTATTAACATGGTGACAGAA	intronic antisense	NM_001168360	PCDH11X	protocadherin-11 X-linked isoform e precursor	+	91090459	91878228
ASHG19A3A040147	2.63389	1.39719	2.63389	up	2412.05	5864.32	11.1078	12.505	noncoding	ENST00000428832	RP13-136L2.1	Ensembl	1217	chrX	-	91368243	91369460	ENST00000422633,	AGAATCAGTCGAGGTGGACAGTTTGGCCGTAAAGATGTGGCTATTAACATGGTGACAGAA	intronic antisense	NM_032968	PCDH11X	protocadherin-11 X-linked isoform c precursor	+	91089658	91878228
ASHG19A3A040147	2.63389	1.39719	2.63389	up	2412.05	5864.32	11.1078	12.505	noncoding	ENST00000428832	RP13-136L2.1	Ensembl	1217	chrX	-	91368243	91369460	ENST00000422633,	AGAATCAGTCGAGGTGGACAGTTTGGCCGTAAAGATGTGGCTATTAACATGGTGACAGAA	intronic antisense	NM_001168363	PCDH11X	protocadherin-11 X-linked isoform h precursor	+	91090459	91878228
ASHG19A3L0002657	2.19271	1.13272	2.19271	up	64.4198	137.113	5.89152	7.02424	noncoding	chr8:30192504-30200352+	lincRNA-RBPMS-2	lincRNA	7849	chr8	+	30192504	30200352		TCATCCATACATCCAAACTTCAGAGGTGCTTTGTCAGGCATTTTTCACAGCTTCTCCCTT	intergenic
ASHG19A3A019171	3.52437	1.81737	3.52437	up	1026.51	3250.51	9.86674	11.6841	noncoding	CR599727		misc_RNA	1082	chr21	+	34636824	34637906		CTGGGTTGATCTTTTGCGATAACCTCTATGGCTGTGAGTGTGTGTGTGTGTTTGTGTATT	intergenic
ASHG19A3A033057	2.4116	1.26999	2.4116	up	1113.47	2370.01	9.99025	11.2602	noncoding	ENST00000453932	AC005522.8	Ensembl	897	chr7	-	76099478	76100375	NR_003262,ENST00000429043,	TTCAAGAGTTCTTTCAGATTCAGGATGATTACCTTGACTTCTCTGGGGACCCCAGTGTGA	intronic antisense	NM_001102595	DTX2	protein deltex-2 isoform a	+	76090971	76135312
ASHG19A3A033057	2.4116	1.26999	2.4116	up	1113.47	2370.01	9.99025	11.2602	noncoding	ENST00000453932	AC005522.8	Ensembl	897	chr7	-	76099478	76100375	NR_003262,ENST00000429043,	TTCAAGAGTTCTTTCAGATTCAGGATGATTACCTTGACTTCTCTGGGGACCCCAGTGTGA	natural antisense	NM_020892	DTX2	protein deltex-2 isoform a	+	76090971	76135312
ASHG19A3A033057	2.4116	1.26999	2.4116	up	1113.47	2370.01	9.99025	11.2602	noncoding	ENST00000453932	AC005522.8	Ensembl	897	chr7	-	76099478	76100375	NR_003262,ENST00000429043,	TTCAAGAGTTCTTTCAGATTCAGGATGATTACCTTGACTTCTCTGGGGACCCCAGTGTGA	intronic antisense	NM_001102594	DTX2	protein deltex-2 isoform a	+	76090971	76135312
ASHG19A3A018341	2.80642	1.48873	2.80642	up	7154.41	24109.5	12.7234	14.2121	noncoding	ENST00000358609	RPL27AP	Ensembl	435	chr20	+	42281162	42281931		AGGATCAACTTCAACAAATACTACCCAGGTTACTTTGGGAAAGTTGGTATGAGGTATTAC	intergenic
ASHG19A3A007657	2.3715	1.2458	2.3715	up	1013.37	2102.46	9.851	11.0968	noncoding	NR_028414	APOC1P1	RefSeq_NR	631	chr19	+	45430059	45434643		AAGCCCTCCAGCAAGGATTCAGGTTGGTGCCCCTCCGGCCTCGCCATGAGGCTCTTCCTG	intergenic
ASHG19A3A038375	2.40569	1.26645	2.40569	up	65.4402	151.296	5.91536	7.18181	noncoding	ENST00000435137	RP11-280O24.3	Ensembl	792	chr9	+	14204246	14205038		AGCCTGTGGCTTACATTGCCAAGCTCAAAAGGCAAAAGCTAAAGAACTTGCCACCAAACT	intronic antisense	NM_001190738	NFIB	nuclear factor 1 B-type isoform 2	-	14081841	14398982
ASHG19A3A038375	2.40569	1.26645	2.40569	up	65.4402	151.296	5.91536	7.18181	noncoding	ENST00000435137	RP11-280O24.3	Ensembl	792	chr9	+	14204246	14205038		AGCCTGTGGCTTACATTGCCAAGCTCAAAAGGCAAAAGCTAAAGAACTTGCCACCAAACT	intronic antisense	NM_001190737	NFIB	nuclear factor 1 B-type isoform 1	-	14081841	14314045
ASHG19A3A038375	2.40569	1.26645	2.40569	up	65.4402	151.296	5.91536	7.18181	noncoding	ENST00000435137	RP11-280O24.3	Ensembl	792	chr9	+	14204246	14205038		AGCCTGTGGCTTACATTGCCAAGCTCAAAAGGCAAAAGCTAAAGAACTTGCCACCAAACT	intronic antisense	NM_005596	NFIB	nuclear factor 1 B-type isoform 3	-	14081841	14314045
ASHG19A3A007950	6.27516	2.64965	6.27516	up	169.1	922.014	7.28995	9.9396	noncoding	uc002goc.1	AK123263	UCSC_knowngene	2800	chr17	-	13680148	13695867	ENST00000423323,	GGCAGAATATTTTGTTCCTTTATGGGTCAGCCTGGGATACAAAATTAGAGAAACTTTGCA	intergenic
ASHG19A3A032598	3.49514	1.80535	3.49514	up	3353.98	12138.3	11.6101	13.4155	noncoding	ENST00000313836	AC004996.2	Ensembl	357	chr7	-	27308971	27309330		TCAGAAAGAGAAACTCAGGAAATTCTACAAGGGCAAGAAGTATAAGCCCCTGGACCTGTG	intergenic
ASHG19A3A032310	2.70658	1.43647	2.70658	up	143.164	352.533	7.05038	8.48685	noncoding	ENST00000452944	RP1-230L10.1	Ensembl	719	chr6	+	164124935	164180873		GTTGTTTCCAATAGTTGACTAGTTTTCTTCCCCAGCACTTACGAGTACACAGCCAGTCAC	intergenic
ASHG19A3A047932	2.59447	1.37544	2.59447	up	225.178	517.963	7.68993	9.06537	noncoding	BC038355		misc_RNA	1448	chr12	-	100426102	100427457		CTTAATACCTTCATTGTCCTTTAAGTATTCGGAATGAGAATTACAGTGCTTCATTCAGCA	intergenic
ASHG19A3H0000093	2.64072	1.40093	2.64072	up	81.0405	200.501	6.23321	7.63414	noncoding	nc-HOXB9-192-	nc-HOXB9-192	HOX cluster	318	chr17	-	46767765	46768083	nc-HOXB9-193-,	CCACGTCTACTGCGAGAATGAAGACCATTCTCAGCAATCAGACTGTTGACATTCCAGAAA	intergenic
ASHG19A3A029193	2.08946	1.06313	2.08946	up	74.2102	149.897	6.10381	7.16694	noncoding	uc003mdm.1	AK055006	UCSC_knowngene	2671	chr5	+	175547849	175559261		ACCACAGGATGCCTGCCATTCATGAACAAGAAGGAGAGGACGGGCTTTGAATAAAAAACA	intergenic
ASHG19A3A016637	3.87639	1.95471	3.87639	up	154.082	534.098	7.15842	9.11313	noncoding	ENST00000426615	AC009336.24	Ensembl	658	chr2	+	177042908	177043737		GAAGTAGGCTAAGACTGCTGTTGAACTTGAAGCTAAACTTGAATGCCATTTAAAATAACA	intergenic
ASHG19A3A014516	3.75346	1.90822	3.75346	up	106.57	361.726	6.62113	8.52935	noncoding	ENST00000464802	AC019201.1	Ensembl	691	chr2	-	158236235	158236926	NR_027508,NM_152789,NM_001040057,	ACTCAGCAAAAAGAGAAAGATGTATTCTGAAGATAAACCTTTATCATCTGAGTCCTTGTC	intergenic
ASHG19A3A023794	2.09671	1.06812	2.09671	up	1026.8	1865.4	9.86814	10.9363	noncoding	AK125235		misc_RNA	1975	chr3	+	197613327	197615303		TTGCCTGTACGCCACTTTACACATTGACATTCAAATAAAAGCCAACACTTCAGTGGCGTG	intergenic
ASHG19A3A039224	3.13789	1.6498	3.13789	up	3801.01	12455.9	11.8034	13.4532	noncoding	NR_027406	LOC100129034	RefSeq_NR	5714	chr9	+	127115751	127121461		TGCTATGTAAGATTATGAGTGATCCTCCCTCTATTTTGCAAACAGTCTGTAAGTAACTGA	natural antisense	NM_002799	PSMB7	proteasome subunit beta type-7 proprotein	-	127115743	127177721
ASHG19A3A040765	4.57907	2.19505	4.57907	up	39.9359	173.852	5.20516	7.40021	noncoding	ENST00000432626	RP11-753E22.4	Ensembl	275	chrX	+	24668189	24676354		TTGGAGACCAGTCCTGGCAGCTGCTACAACCTGACTCAGAAACTTCTTGATAATACTTGA	intronic antisense	NM_001163264	PCYT1B	choline-phosphate cytidylyltransferase B isoform	-	24576203	24690979
ASHG19A3A028328	3.38362	1.75857	3.38362	up	409.527	1190.81	8.54357	10.3021	noncoding	uc011crg.1	SMA4	UCSC_knowngene	2024	chr5	+	69140556	69275148	NR_029426,ENST00000508727,ENST00000380734,	GATTTACTTTTGGGATACACTCATTATTCCAGAGGAGGGTAAAAGGCTGAGAAGCTTAAG	intergenic
ASHG19A3A017306	2.26302	1.17825	2.26302	up	14209.8	46932.9	13.8034	14.9816	noncoding	ENST00000458402	RP5-1068H6.3	Ensembl	793	chr20	-	4610072	4610865		GGAAAAGGTATCTGCCTCACCATTGCTGAAGAGAGAGACAAGAGATTGGCAACCAATCAA	intergenic
ASHG19A3A027920	12.8331	3.68179	12.8331	up	78.3322	880.628	6.18612	9.86791	noncoding	uc003jej.2	BC032891	UCSC_knowngene	1003	chr5	+	8839876	8881632		CTTGCATTCTCAGCCTCTGCCTGGGAGGAGGAAGAGGCACTTCCACATTTCTTGTGACAG	intergenic
ASHG19A3A018117	2.26908	1.18211	2.26908	up	95.6537	203.061	6.47164	7.65374	noncoding	AF035314		NRED	2066	chr20	+	21218819	21237719		AACCCCACTGTTGCCTTTTCAGCCAATTTCATGGTGTTTATTCTGGTGTCAGTCTCCTCA	intron sense-overlapping	NM_001163023	PLK1S1	centrosomal protein kizuna isoform 3	+	21106623	21227258
ASHG19A3A018117	2.26908	1.18211	2.26908	up	95.6537	203.061	6.47164	7.65374	noncoding	AF035314		NRED	2066	chr20	+	21218819	21237719		AACCCCACTGTTGCCTTTTCAGCCAATTTCATGGTGTTTATTCTGGTGTCAGTCTCCTCA	intron sense-overlapping	NM_001163022	PLK1S1	centrosomal protein kizuna isoform 2	+	21106623	21227258
ASHG19A3A018117	2.26908	1.18211	2.26908	up	95.6537	203.061	6.47164	7.65374	noncoding	AF035314		NRED	2066	chr20	+	21218819	21237719		AACCCCACTGTTGCCTTTTCAGCCAATTTCATGGTGTTTATTCTGGTGTCAGTCTCCTCA	intron sense-overlapping	NM_018474	PLK1S1	centrosomal protein kizuna isoform 1	+	21106623	21227258
ASHG19A3A029446	2.14944	1.10396	2.14944	up	483.414	890.075	8.78149	9.88545	noncoding	uc001elr.3	AK125792	UCSC_knowngene	1417	chr1	+	144828972	144830389	uc001ayw.2,NM_183372,NM_173638,NM_001170755,NM_001102663,	TCACATAGTCCTTATCACCACAAATCACACAACAAAAAGGAGAAGAGATATTTTGGGTTC	intergenic
ASHG19A3A028622	4.47807	2.16288	4.47807	up	169	664.399	7.28918	9.45205	noncoding	NR_027706	FLJ11235	RefSeq_NR	1406	chr5	+	111755279	111756673		CAGCATAACCGCCAAAGTGCAATATAAATTTCTGAACTTTACCTAGGCTATGAATAAAAC	bidirectional	NM_022140	EPB41L4A	band 4.1-like protein 4A	-	111498314	111755010
ASHG19A3A032755	4.48623	2.1655	4.48623	up	1142	4737.71	10.0278	12.1933	noncoding	ENST00000438468	AC004938.5	Ensembl	308	chr7	-	44550623	44550931		TAAGAGATACAAGCATTTTGAACTGGGAGGAGGTAAGAAGAGCAAGGGCCAAGTGATCCA	intergenic
ASHG19A3A028744	3.28593	1.7163	3.28593	up	112.66	338.125	6.70797	8.42427	noncoding	AK001007		misc_RNA	1721	chr5	+	125832579	125834296		TGATCACTGAATTTCCAGCACTTCTTTGTTGTGTCTAGATGCTAAGCCCTTTTCTAATTT	intergenic
ASHG19A3A055143	3.59	1.84398	3.59	up	36.2325	127.513	5.06353	6.90751	noncoding	uc002jix.2	AK000477	UCSC_knowngene	1697	chr17	-	70380461	70588943		CACAGTTGTATGCCATCATGCCCAGACCAGATTTCGCCATATTGCTCAGGATGGTCTTGA	intergenic
ASHG19A3A044648	5.33699	2.41603	5.33699	up	38.5669	193.617	5.15583	7.57186	noncoding	ENST00000446589	RP11-442O18.2	Ensembl	450	chr10	+	130711142	130714535		TAAGAAACTCTTATGAAGTTGTCGGGGTTCAAGTTGGCCTTCCTGTTGTTCAACCTGGTG	intergenic
ASHG19A3A044290	2.83246	1.50205	2.83246	up	51.5619	142.468	5.57859	7.08064	noncoding	ENST00000450552	RPS27P1	Ensembl	247	chr10	+	93304608	93304855		TGAAGGAACCCAAGAAGCACTCAGGGTTAAGCCCCAATTCCTACTGCATAGATGTAAGAT	intergenic
ASHG19A3A013525	2.14564	1.10141	2.14564	up	73.5744	152.436	6.09024	7.19165	noncoding	ENST00000413092	RP11-439E19.6	Ensembl	322	chr1	-	246918812	246919134		ATACTGACTCCTGGCAGCAAACCAAACAAAACCAGAGTAAGGTGGAGAAAGGTAACGTGT	intronic antisense	NM_016002	SCCPDH	probable saccharopine dehydrogenase	+	246887377	246931440
ASHG19A3A036046	6.30467	2.65642	6.30467	up	935.815	5458.61	9.73706	12.3935	noncoding	ENST00000382740	KB-1024H10.1	Ensembl	718	chr8	-	109391056	109391774		TTAAGTTGTAGGAGGAGGAGAGAGAAAGAAGAGACAATTATGTTCCTGAGGTCTGAGCCC	intergenic
ASHG19A3A029691	2.13572	1.09472	2.13572	up	107.106	212.926	6.62948	7.7242	noncoding	ENST00000421191	XXbac-BPG248L24.10	Ensembl	306	chr6	-	31275591	31276326		ACAAGGAGATTTCATGTCCCTGAACGAGGACCTGCAGACCTGGACAGCGGCTCAAAGAGC	intergenic
ASHG19A3A015661	3.12789	1.64519	3.12789	up	179.083	503.692	7.37558	9.02077	noncoding	NR_002229	RPL23AP32	RefSeq_NR	620	chr2	+	54756358	54756978		CTCAAAGATACACTTGAGACCCTTTTCAGAAGATGGCACCGAAAGTGAAGAAGGAAGCTC	intron sense-overlapping	NM_003128	SPTBN1	"spectrin beta chain, brain 1 isoform 1"	+	54683453	54898583
ASHG19A3A040598	2.1627	1.11283	2.1627	up	1188.13	2261.39	10.0835	11.1964	noncoding	ENST00000393544	AF277315.8	Ensembl	1065	chrX	-	153850678	153851751	ENST00000438498,	AACTGATCTGAAGGAGTTCGACTTTGATGCCCTGTTGGGTATAGATGACCTGGAAACCAT	intergenic
ASHG19A3A033521	2.16326	1.11321	2.16326	up	111.535	224.635	6.69235	7.80555	noncoding	ENST00000433622	RP11-309L24.6	Ensembl	918	chr7	-	128552713	128563124		TCAGAGATCATGTGAACGCCCTGAACGCCTGCTCGGGGACCTTGTCTGTCACCATTGATG	intergenic
ASHG19A3A050688	2.96273	1.56693	2.96273	up	106.529	288.727	6.62078	8.18771	noncoding	ENST00000484753	CTD-2213F21.1	Ensembl	577	chr14	-	31932000	31932577		GGGTAAAAAATACATCCGCAGGGTTCGAATGAGGATAAATGTTGTTTGTTCAGTATCTCA	intergenic
ASHG19A3A040074	2.16421	1.11384	2.16421	up	42.132	91.2027	5.28505	6.39889	noncoding	G43618		misc_RNA	125	chrX	-	72906795	72906920		GCAGTGAAAGTTTCGGAGAGGCAGGTATCCTTCATTTTGGCACAGCTGTATATAGATTGA	natural antisense	NM_001039840	CHIC1	cysteine-rich hydrophobic domain 1 protein	+	72782983	72906937
ASHG19A3L0000610	2.09756	1.06871	2.09756	up	200.668	380.099	7.53609	8.60481	noncoding	AK122825	lincRNA-HMGB1-2	lincRNA	4200	chr13	-	31032883	31191734	NM_002128,	CTGAAAAATGAAATTTGTGTGTCCTGTGTACCCGAGGGGTAATGATTAAATGATAAAGAT	exon sense-overlapping	NM_002128	HMGB1	high mobility group protein B1	-	31032878	31040081
ASHG19A3L0000610	2.09756	1.06871	2.09756	up	200.668	380.099	7.53609	8.60481	noncoding	AK122825	lincRNA-HMGB1-2	lincRNA	4200	chr13	-	31032883	31191734	NM_002128,	CTGAAAAATGAAATTTGTGTGTCCTGTGTACCCGAGGGGTAATGATTAAATGATAAAGAT	bidirectional	NM_005800	USPL1	ubiquitin-specific peptidase-like protein 1	+	31191829	31233686
ASHG19A3A012115	3.56874	1.83542	3.56874	up	53.252	180.481	5.62193	7.45735	noncoding	AK057440		misc_RNA	1065	chr1	-	228351825	228352685		TGTGTCCTTATGGTGCAGAGTCCCAGCAAGCAGAGGTCTTTGTATCTGTTGAATAAAAAA	bidirectional	NM_001010867	IBA57	"putative transferase CAF17, mitochondrial"	+	228353428	228369958
ASHG19A3A031861	2.28036	1.18926	2.28036	up	32.385	75.22	4.90645	6.09571	noncoding	ENST00000424521	RP3-453D15.1	Ensembl	138	chr6	+	99006309	99006447		GGAGTTGGTTTTTACTCCCAAGCCCTTTGCTACTTAAATAAAGTTATTGGCTGCCTAATG	intergenic
ASHG19A3A042121	2.02023	1.01452	2.02023	up	114.183	215.407	6.72602	7.74055	noncoding	ENST00000426660	AC007241.2	Ensembl	1303	chrY	+	20442063	20446647		GGTTGCCCTGTGCTGACCACCAGCCTCGAGTTCCTCAAACAGTAGGAGTGAAAGAATGGC	intergenic
ASHG19A3A021434	3.1427	1.65201	3.1427	up	3336.57	10623.6	11.6017	13.2538	noncoding	ENST00000485426	RP11-435F17.1	Ensembl	495	chr3	-	113569083	113569578	ENST00000480396,ENST00000456185,ENST00000408001,	TTCTACTGGTACCTTACCAATGAGGGCATCCAGTATCTCCATGATTATCTTCATCTGCCC	intronic antisense	NM_017577	GRAMD1C	GRAM domain-containing protein 1C isoform 1	+	113557680	113666021
ASHG19A3A050906	2.69298	1.4292	2.69298	up	197.993	479.144	7.51516	8.94436	noncoding	ENST00000473054	RP11-204K16.1	Ensembl	801	chr14	-	68805444	68806245		CTCACATTATCAAGCTCGAAAAGGCAAAGGTTAAAGAACTTTGCCACTGAACTGGGTTAA	intronic antisense	NM_133509	RAD51L1	DNA repair protein RAD51 homolog 2 isoform 3	+	68286495	69062738
ASHG19A3A050906	2.69298	1.4292	2.69298	up	197.993	479.144	7.51516	8.94436	noncoding	ENST00000473054	RP11-204K16.1	Ensembl	801	chr14	-	68805444	68806245		CTCACATTATCAAGCTCGAAAAGGCAAAGGTTAAAGAACTTTGCCACTGAACTGGGTTAA	intronic antisense	NM_133510	RAD51L1	DNA repair protein RAD51 homolog 2 isoform 2	+	68286495	68944810
ASHG19A3A050906	2.69298	1.4292	2.69298	up	197.993	479.144	7.51516	8.94436	noncoding	ENST00000473054	RP11-204K16.1	Ensembl	801	chr14	-	68805444	68806245		CTCACATTATCAAGCTCGAAAAGGCAAAGGTTAAAGAACTTTGCCACTGAACTGGGTTAA	intronic antisense	NM_002877	RAD51L1	DNA repair protein RAD51 homolog 2 isoform 1	+	68286495	68964598
ASHG19A3A051947	4.35735	2.12345	4.35735	up	150.848	585.506	7.12862	9.25207	noncoding	AK094982		misc_RNA	3101	chr15	-	31767606	31770705		CTCCATTACCTGACACAGAGAGAAGCTTTGATGCCTACTCAATAAAATTAACATGTTTGT	intergenic
ASHG19A3A033512	3.94842	1.98128	3.94842	up	258.174	878.55	7.88305	9.86433	noncoding	ENST00000461273	RP11-274B21.5	Ensembl	132	chr7	-	128309140	128309946		TATTGTTTTTGTGGTGGGGGCCTTTGCCTAGAGCAAGGTCAGTGTGGAATATACAGAGAA	intergenic
ASHG19A3A021161	4.87366	2.28501	4.87366	up	1192.95	5375.87	10.089	12.374	noncoding	ENST00000418538	RP11-72H11.1	Ensembl	390	chr3	-	53508726	53509116		AAGGAAGTTTCCAGCTATAGGTTTATAACCCCAGCTGTGGTCTCTCAGAGATTGGAGATT	intergenic
ASHG19A3A007996	2.52433	1.3359	2.52433	up	28.491	73.1501	4.71558	6.05148	noncoding	NR_029392	KRT16P2	RefSeq_NR	1575	chr17	-	16733796	16736147	NR_029393,	TATATTGTCTGGCCCATCAGTACCCCAACTGGGATCAAAATCCAGGCACCTCTCAAAAAA	intergenic
ASHG19A3A023873	3.14182	1.6516	3.14182	up	183.031	515.147	7.40456	9.05616	noncoding	ENST00000514073	AC226119.4	Ensembl	682	chr4	-	3916909	3957146	ENST00000513014,	AAGGAGCTGAAACTGCACTGCCATGAATCCAAGTTCCTCAACATCTACTCTGTGACCTAT	intergenic
ASHG19A3A030403	2.14206	1.099	2.14206	up	97.5409	196.031	6.49534	7.59434	noncoding	ENST00000439811	RP11-506B6.2	Ensembl	1286	chr6	-	112682638	112683924	ENST00000453838,	TGGATAGTGGATGGCAAAGTTGTGTCTGAGACCAACCACACCAAAGTTCTGAGACATTAA	intergenic
ASHG19A3A053873	3.49605	1.80573	3.49605	up	80.9131	261.821	6.23145	8.03718	noncoding	ENST00000482557	RP11-71L14.1	Ensembl	336	chr16	-	68511138	68511474		TGCAAACAAAACAAAACCAGAGCAATCTGGGGAAAGGTAACTCAGGCCCATGGAAACAGT	intergenic
ASHG19A3A030756	2.52707	1.33746	2.52707	up	1187.66	2667.73	10.0818	11.4192	noncoding	ENST00000455507	RP11-507C10.7	Ensembl	450	chr6	-	159262752	159263202	NR_028496,NM_021227,	TTGAGCTTTTTCATGGCTAGAGTATTCATGAGAATGAAACTGCCGGGCTATCTGATGGGT	intergenic
ASHG19A3A045098	2.29185	1.19651	2.29185	up	158.854	332.147	7.2002	8.39671	noncoding	ENST00000499027	AC103681.2	Ensembl	1866	chr11	-	45168193	45236289		TAAAGTGCTCTCTATGAATGCAAGACAGTCTTTTCCTTCCTCCGACGTCATCCCATTCTT	intronic antisense	NM_020229	PRDM11	PR domain-containing protein 11	+	45115563	45246903
ASHG19A3A040627	2.52748	1.3377	2.52748	up	60.8564	148.598	5.81341	7.15111	noncoding	ENST00000431238	NCRNA00108	Ensembl	290	chrX	+	170409	172712		CCGGCCGGCGTGTGCGTGGACGCTGCGGGGAAGCTCTGGGTGGCCTCTGCGTCGATAGAG	intergenic
ASHG19A3A015935	2.13753	1.09594	2.13753	up	16992.2	56550.1	14.1049	15.2009	noncoding	ENST00000452984	AC133965.1	Ensembl	354	chr2	+	87954408	87954762	ENST00000451736,	CATATCTTTGCATCCTTCAATGACACATTTGTCCATGTCACTGATCTTTCTGGCAAAAAA	intergenic
ASHG19A3A030402	2.07367	1.05219	2.07367	up	725.919	1298.68	9.36814	10.4203	noncoding	ENST00000401872	RP11-506B6.3	Ensembl	874	chr6	-	112677042	112677916		GCTAAAAAAGCTGTGACCAAGAAAGAATTTCAGGGTGAATGGACTGCTTCAGCTCCTGAG	intergenic
ASHG19A3A047063	2.73053	1.44918	2.73053	up	1126.66	2727.18	10.0067	11.4559	noncoding	ENST00000479573	RP11-762B21.3	Ensembl	304	chr11	+	122921882	122922186		AGCGCTGTACCTATGTACCTGTTACCACTTTCAAAAATGTATAGACCGTCAACATGGATG	intergenic
ASHG19A3A040888	2.1364	1.09518	2.1364	up	721.228	1332.39	9.35754	10.4527	noncoding	ENST00000444247	RP11-115P16.1	Ensembl	241	chr1	+	226969201	226969442		TCACATTTGTTAGCCATGCACAAACAGTAGTTTTGTGTGATGGCTTCTCCACCGTCCTCT	intergenic
ASHG19A3A010452	2.02126	1.01525	2.02126	up	125.474	235.29	6.86111	7.87636	noncoding	U79248		NRED	1615	chr18	+	5243922	5245185	uc010dko.2,NR_015389,	CTAAAGAAGTGACCAGAATGGAGACTAGGTAGAGACAACTAGTTCTCTACCAAACATGTA	intergenic
ASHG19A3A020827	2.93646	1.55408	2.93646	up	4053.69	12584.5	11.9063	13.4604	noncoding	ENST00000426040	AC098614.1	Ensembl	255	chr3	-	27665692	27665947		GCCTACGGAGTAAAAGCAAGGCTTACAGAAGGATGTTCCTTCAGAAGGAAACAGCACTAA	intergenic
ASHG19A3A041963	4.47408	2.16159	4.47408	up	72.9217	299.076	6.0758	8.23739	noncoding	AK056930		misc_RNA	2242	chr1	+	234740014	234742204		ATGCAGCATTGTAATCTTACAACTGATCACGTGGACAGTGAACAGCGGTCAACTTTGTCT	natural antisense	NM_001077397	IRF2BP2	interferon regulatory factor 2-binding protein 2	-	234740014	234745271
ASHG19A3A041963	4.47408	2.16159	4.47408	up	72.9217	299.076	6.0758	8.23739	noncoding	AK056930		misc_RNA	2242	chr1	+	234740014	234742204		ATGCAGCATTGTAATCTTACAACTGATCACGTGGACAGTGAACAGCGGTCAACTTTGTCT	natural antisense	NM_182972	IRF2BP2	interferon regulatory factor 2-binding protein 2	-	234740014	234745271
ASHG19A3A007101	2.60067	1.37889	2.60067	up	5176.57	14652.4	12.274	13.6529	noncoding	NR_002578	GAS5	RefSeq_NR	651	chr1	-	173833039	173837125	ENST00000430245,	AGGCAGACCTGTTATCCTAAACTAGGGTTTTTAATGACCACAACAAGCAAGCATGCAGCT	bidirectional	NM_032522	ZBTB37	zinc finger and BTB domain-containing protein 37	+	173837492	173842778
ASHG19A3A007101	2.60067	1.37889	2.60067	up	5176.57	14652.4	12.274	13.6529	noncoding	NR_002578	GAS5	RefSeq_NR	651	chr1	-	173833039	173837125	ENST00000430245,	AGGCAGACCTGTTATCCTAAACTAGGGTTTTTAATGACCACAACAAGCAAGCATGCAGCT	bidirectional	NM_001122770	ZBTB37	zinc finger and BTB domain-containing protein 37	+	173837492	173855774
ASHG19A3A010649	2.21131	1.1449	2.21131	up	401.17	763.866	8.51817	9.66307	noncoding	NR_003003	SCARNA17	RefSeq_NR	421	chr18	+	47340392	47340813		GCGCAATCTGAGTTCTGGGAACCAGGTGATGGAGTATGTTCTGAGAACAGACTGAGGCCG	bidirectional	NM_006111	ACAA2	"3-ketoacyl-CoA thiolase, mitochondrial"	-	47309873	47340251
ASHG19A3A022509	7.53632	2.91386	7.53632	up	298.604	1962.4	8.09923	11.0131	noncoding	ENST00000437295	RP11-141M3.1	Ensembl	946	chr3	+	42930852	42931798	NR_002944,NM_031157,NM_002136,NM_001011725,NM_001011724,ENST00000512366,ENST00000505767,ENST00000458678,ENST00000444945,ENST00000432375,ENST00000424481,ENST00000424115,ENST00000411857,ENST00000406078,ENST00000404243,ENST00000391992,ENST00000222956,	TTACAACAATCAGTCTTCACATTTTGGACCCATGAAGGGAGGAAACTTTGGAGGCAGAAG	intergenic
ASHG19A3L0002206	2.59473	1.37558	2.59473	up	290.576	658.234	8.06015	9.43573	noncoding	chr9:137160729-137173954-	lincRNA-WDR5-2	lincRNA	13226	chr9	-	137160729	137173954		AAACACACACACACACACACAGTCTTGAATCCTGCTCTCGGGGTCCGTCTCAGGCACTGT	intergenic
ASHG19A3A017288	2.80822	1.48966	2.80822	up	418.333	1003.75	8.57254	10.0622	noncoding	ENST00000446317	SF3A3P1	Ensembl	1477	chr20	-	3470175	3471652	NM_006802,HIT000294644,	AGTGGGAATGTTGTGAATAAGAAGACATATGAGGATCTGAAAAGACAAGGACTGCTCTAG	intronic antisense	NM_139321	ATRN	attractin isoform 1 preproprotein	+	3451664	3631769
ASHG19A3A017288	2.80822	1.48966	2.80822	up	418.333	1003.75	8.57254	10.0622	noncoding	ENST00000446317	SF3A3P1	Ensembl	1477	chr20	-	3470175	3471652	NM_006802,HIT000294644,	AGTGGGAATGTTGTGAATAAGAAGACATATGAGGATCTGAAAAGACAAGGACTGCTCTAG	intronic antisense	NM_139322	ATRN	attractin isoform 2 preproprotein	+	3451664	3596550
ASHG19A3A026103	2.23312	1.15906	2.23312	up	1252.32	2477.36	10.1615	11.3205	noncoding	ENST00000504966	KRT18P51	Ensembl	742	chr4	+	145493389	145494131	ENST00000469825,ENST00000402024,ENST00000400056,ENST00000397031,	TTCAATCTTGGTGATGCCCTGGACAACAGCAACTCCATGAAACCATCAAAAAGACCACCA	intergenic
ASHG19A3A010462	6.04078	2.59473	6.04078	up	68.1083	372.07	5.97542	8.57016	noncoding	AK022058		NRED	3170	chr18	+	8014414	8017580		GCTGGCTGATGGAAGAAAATGGGTGATCAAGTTTTTGCTTCTGAATATTTGACATAAACA	intron sense-overlapping	NM_001105244	PTPRM	receptor-type tyrosine-protein phosphatase mu	+	7567313	8406859
ASHG19A3A010462	6.04078	2.59473	6.04078	up	68.1083	372.07	5.97542	8.57016	noncoding	AK022058		NRED	3170	chr18	+	8014414	8017580		GCTGGCTGATGGAAGAAAATGGGTGATCAAGTTTTTGCTTCTGAATATTTGACATAAACA	intron sense-overlapping	NM_002845	PTPRM	receptor-type tyrosine-protein phosphatase mu	+	7567313	8406859
ASHG19A3A034091	2.09671	1.06813	2.09671	up	34.463	73.8592	4.9988	6.06693	noncoding	NR_002795	HOXA11AS	RefSeq_NR	1628	chr7	+	27225026	27228912	nc-HOXA11-84+,	ATTTGCACGGTGACTTGATTACACTCTCTCATTCATGGTCACTTCCGAAGCGCTTTAGTG	bidirectional	NM_005523	HOXA11	homeobox protein Hox-A11	-	27220775	27224835
ASHG19A3A013944	2.91646	1.54422	2.91646	up	267.956	676.324	7.93365	9.47787	noncoding	AK054569		NRED	2003	chr2	-	85772073	85774076		ACACCTTGGCCTACCTGGGAATGCTGGAAACATGTTGTTAAAGGAATCATGGTGTTGAGA	natural antisense	NM_005911	MAT2A	S-adenosylmethionine synthase isoform type-2	+	85766287	85772403
ASHG19A3A015980	2.35338	1.23473	2.35338	up	4201.41	9955.16	11.9515	13.1862	noncoding	ENST00000452670	AC097374.5	Ensembl	400	chr2	+	95578176	95578576		GAACAGAATGAAGAAAGTCAGGAGAACTGCAAAGGCTAGTGTTGGTGCTGGCAAAAAGCT	intergenic
ASHG19A3A028813	3.19509	1.67585	3.19509	up	72.8309	216.625	6.07446	7.75031	noncoding	ENST00000503470	RP11-215P8.3	Ensembl	520	chr5	+	133735185	133737612		CCACAGACTAAGGAATGTTTCAGAAAGCAGTTTTCTAGGTGTAGTTTGGATTTACAAAAA	intergenic
ASHG19A3A033280	2.20694	1.14205	2.20694	up	482.715	911.199	8.77946	9.9215	noncoding	ENST00000428316	RP4-747G18.5	Ensembl	882	chr7	-	100846894	100847776	NR_026890,ENST00000484897,ENST00000483913,ENST00000483479,ENST00000454001,ENST00000453374,ENST00000445182,ENST00000418207,ENST00000412542,ENST00000339991,	AGACATTGAAAAAGAAGAGCAGGCTGCTGCTGAAAAGGCTGTGACAAGGAGGAATTTCAG	intergenic
ASHG19A3A023489	2.16654	1.1154	2.16654	up	189.527	372.265	7.45596	8.57136	noncoding	ENST00000494739	RP11-12K11.1	Ensembl	167	chr3	+	166579731	166579898	NM_032637,	CCAGCCATAAGCTATTTTGCCAACATATCAGAGTAATCTGTACTTTTGTATGTGATTTCT	intergenic
ASHG19A3A053353	3.996	1.99856	3.996	up	251.222	864.451	7.84239	9.84094	noncoding	uc002ckm.1	BC098409	UCSC_knowngene	3222	chr16	-	1025760	1030913		GAACGTTCCAGAGACCCATTAGTGCCAAAGGCAAATGAAAACACACCCTGTGAAAATGTC	bidirectional	NM_014587	SOX8	transcription factor SOX-8	+	1031807	1036979
CUST_466_PI426073487	2.14679	1.10218	2.14679	up	36.8026	79.8804	5.08626	6.18844	noncoding	uc.468+	uc.468	UCR	489	chrX	+	25017562	25018051		AAAGGAGAAAGTGCAACCAGCCTTCAATTCACTCTTTCACCACTTTAACAGCACCAAAGG	intergenic
ASHG19A3A008790	3.00853	1.58906	3.00853	up	24.5815	74.5896	4.49391	6.08297	noncoding	NR_033345	GGA3	RefSeq_NR	4091	chr17	-	73232694	73257707		CTGCAGCCCTGTTGCCAGTGAAGGAGCTGGAGTCTCTGTTATGATGTGTTCATCCAGCTG	exon sense-overlapping	NM_014001	GGA3	ADP-ribosylation factor-binding protein GGA3	-	73232693	73257707
ASHG19A3A008790	3.00853	1.58906	3.00853	up	24.5815	74.5896	4.49391	6.08297	noncoding	NR_033345	GGA3	RefSeq_NR	4091	chr17	-	73232694	73257707		CTGCAGCCCTGTTGCCAGTGAAGGAGCTGGAGTCTCTGTTATGATGTGTTCATCCAGCTG	bidirectional	NM_015971	MRPS7	"28S ribosomal protein S7, mitochondrial"	+	73257748	73262457
ASHG19A3A008790	3.00853	1.58906	3.00853	up	24.5815	74.5896	4.49391	6.08297	noncoding	NR_033345	GGA3	RefSeq_NR	4091	chr17	-	73232694	73257707		CTGCAGCCCTGTTGCCAGTGAAGGAGCTGGAGTCTCTGTTATGATGTGTTCATCCAGCTG	exon sense-overlapping	NM_138619	GGA3	ADP-ribosylation factor-binding protein GGA3	-	73232693	73257707
ASHG19A3A008790	3.00853	1.58906	3.00853	up	24.5815	74.5896	4.49391	6.08297	noncoding	NR_033345	GGA3	RefSeq_NR	4091	chr17	-	73232694	73257707		CTGCAGCCCTGTTGCCAGTGAAGGAGCTGGAGTCTCTGTTATGATGTGTTCATCCAGCTG	exon sense-overlapping	NM_001172704	GGA3	ADP-ribosylation factor-binding protein GGA3	-	73232693	73258444
ASHG19A3A008790	3.00853	1.58906	3.00853	up	24.5815	74.5896	4.49391	6.08297	noncoding	NR_033345	GGA3	RefSeq_NR	4091	chr17	-	73232694	73257707		CTGCAGCCCTGTTGCCAGTGAAGGAGCTGGAGTCTCTGTTATGATGTGTTCATCCAGCTG	exon sense-overlapping	NM_001172703	GGA3	ADP-ribosylation factor-binding protein GGA3	-	73232693	73258444
ASHG19A3A050305	2.02699	1.01934	2.02699	up	433.368	756.183	8.62569	9.64503	noncoding	ENST00000499458	AL137244.1	Ensembl	1717	chr13	+	76099349	76111991		AAGAGATCTGCAAGTGTCTGAGCTCACAGCCATACCCAGTTTCCACTGAAAATCTACAAG	natural antisense	NM_203497	COMMD6	COMM domain-containing protein 6 isoform a	-	76099349	76111991
ASHG19A3A050305	2.02699	1.01934	2.02699	up	433.368	756.183	8.62569	9.64503	noncoding	ENST00000499458	AL137244.1	Ensembl	1717	chr13	+	76099349	76111991		AAGAGATCTGCAAGTGTCTGAGCTCACAGCCATACCCAGTTTCCACTGAAAATCTACAAG	natural antisense	NM_203495	COMMD6	COMM domain-containing protein 6 isoform b	-	76099349	76111991
ASHG19A3A022125	2.19864	1.13661	2.19864	up	412.539	779.553	8.55317	9.68977	noncoding	ENST00000420238	AC090018.1	Ensembl	366	chr3	-	195288084	195288450		TTAACTATGTACCTGTGACCACTTTCAAACATCTATAGACAGTCAATGTGGGTGAGAGCC	intergenic
ASHG19A3A049262	2.49838	1.32099	2.49838	up	259.947	571.568	7.89394	9.21494	noncoding	NR_003272	PSPC1	RefSeq_NR	1716	chr13	-	20248895	20357083		GCTTGCAGTGTAATTCAGAAGAGTTAAGACCAGAAGTACTGGAATCATACTTCCTTTCAG	exon sense-overlapping	NM_001042414	PSPC1	paraspeckle component 1	-	20277008	20357083
ASHG19A3A028465	2.45381	1.29503	2.45381	up	148.691	333.924	7.10894	8.40396	noncoding	ENST00000513251	CTC-566C5.1	Ensembl	355	chr5	+	82722494	82722849		AATCTGGCATTGGAGTTTCTTTGACAAGCACACCTGGGAGATGGTGACAATGAGAGTGAA	intergenic
ASHG19A3A039879	4.5361	2.18145	4.5361	up	172.213	686.256	7.3195	9.50095	noncoding	uc004dpc.1	AX748273	UCSC_knowngene	2001	chrX	-	50331931	50333932		TAGAATGGATAAGAGCTTCGGCTCATTGGGCAAATAAACCAAGTTTTAAATCCTGATTCT	intergenic
ASHG19A3A014206	2.32628	1.21803	2.32628	up	1170.93	2403.83	10.0607	11.2787	noncoding	ENST00000427559	AC104651.2	Ensembl	735	chr2	-	112697878	112698613	NM_016039,	TTGCCTGTTGCTTTAGACAAACATATTCTTGGTTTTGACACAGGAGATGCAGTTCTTAAT	intronic antisense	NM_006343	MERTK	tyrosine-protein kinase Mer precursor	+	112656190	112786945
ASHG19A3A030223	2.34549	1.22989	2.34549	up	65.426	148.046	5.915	7.14489	noncoding	ENST00000405497	RP11-33E24.1	Ensembl	715	chr6	-	86369609	86370324		TTCTCTGCAGTTGGAGCAGAAAGGTACTGACCTCCTGGTGATAGCAATGGAAAATTATGG	intergenic
ASHG19A3A011574	2.09687	1.06824	2.09687	up	250.255	468.254	7.83754	8.90578	noncoding	ENST00000477220	CTC-315K20.1	Ensembl	427	chr19	-	45835955	45836382		TACCAGAAATATGCGGATGAGTCTTCCAAGGAGATCAAAGACATCCTCATCCAGTATGAC	intergenic
ASHG19A3A010546	2.64938	1.40566	2.64938	up	474.963	1073.29	8.75487	10.1605	noncoding	NR_024232	TTC39C	RefSeq_NR	1065	chr18	+	21594383	21600251		GGAAAAAGGCATCTTTTTTCCCCCAACTATTACACTGTCTGAAAAGGTCCTAATTAAATA	exon sense-overlapping	NM_001135993	TTC39C	tetratricopeptide repeat protein 39C isoform 1	+	21594383	21715574
ASHG19A3A010546	2.64938	1.40566	2.64938	up	474.963	1073.29	8.75487	10.1605	noncoding	NR_024232	TTC39C	RefSeq_NR	1065	chr18	+	21594383	21600251		GGAAAAAGGCATCTTTTTTCCCCCAACTATTACACTGTCTGAAAAGGTCCTAATTAAATA	intron sense-overlapping	NM_153211	TTC39C	tetratricopeptide repeat protein 39C isoform 2	+	21572736	21715574
ASHG19A3A033361	2.56045	1.3564	2.56045	up	38.0727	97.0458	5.13657	6.49297	noncoding	NR_028137	LOC286002	RefSeq_NR	3888	chr7	-	107296960	107302243		GTCAATAAAACTATAACTCAATAAATTTCTCAGGCAGAGCCCATCTGCCTCTTCTTTAAT	natural antisense	NM_000441	SLC26A4	pendrin	+	107301079	107358252
ASHG19A3A014636	2.58326	1.36919	2.58326	up	794.199	1795.24	9.50039	10.8696	noncoding	ENST00000440938	AC073465.3	Ensembl	498	chr2	-	174350592	174351090		GTCTGAGTGGTTGGATAGCAAGCATGTGGTCATTGGCAAGGTGAAAGAAGGCATGAATAT	intergenic
ASHG19A3A042860	2.57549	1.36485	2.57549	up	95.6277	228.931	6.47088	7.83573	noncoding	BC047080		misc_RNA	2687	chr10	-	65239046	65241718		GCTGCCATTCTAGGGTGCCAGTCCCTGGAGTTGTGTTGGCTTTATAAAACTATAGTTTAG	intergenic
ASHG19A3A035679	2.04922	1.03507	2.04922	up	16597.4	51729.1	14.0658	15.1009	noncoding	ENST00000468681	RP1-273G13.1	Ensembl	744	chr8	-	33716997	33717741		GACACCAGGAAGGTGAGATCTTCGACACAGAAAAAGAGAAATATGAGAATACAGACAGTG	intergenic
ASHG19A3A023328	2.34743	1.23108	2.34743	up	2468.69	5373.08	11.1406	12.3717	noncoding	ENST00000468434	RP11-372E1.7	Ensembl	172	chr3	+	142679213	142679385		TACCTGGGCAAGCTCTCCATCACCTACAAGCCAGTGAAGTACAGCTGGCTGGGTATGAGG	intergenic
ASHG19A3A037395	3.22375	1.68874	3.22375	up	380.875	1051.68	8.44244	10.1312	noncoding	uc004aby.2	BC019880	UCSC_knowngene	547	chr9	-	41948515	41954688		ATAGGACACTGTGGGCCATAAATGTGTTCTTTGGCCTGAAGAAATAAAACTTGGTGGTCC	intergenic
ASHG19A3A012647	2.81314	1.49218	2.81314	up	43.7978	120.981	5.33882	6.831	noncoding	ENST00000451766	RP11-443B7.1	Ensembl	426	chr1	-	235095412	235105809		GACAGCACTTCCTCATTAAATGCAGAGATCTGCAAAAAGGGAAAATAAAAACACAAGAAG	intergenic
ASHG19A3A010136	2.28389	1.19149	2.28389	up	8830.31	24781.9	13.0565	14.248	noncoding	ENST00000426072	CTD-2124B20.1	Ensembl	657	chr18	-	6462109	6463026	NM_001024662,NM_000970,ENST00000466377,ENST00000463059,ENST00000456481,	ATCTGCCATGTATTCCAGAAAGGCCATGTAGAAGAGGAAGTACTCAGCCGCTAAATCCAA	intergenic
ASHG19A3A034424	2.08935	1.06305	2.08935	up	53.656	110.969	5.63073	6.69378	noncoding	ENST00000418558	RP11-340I6.4	Ensembl	192	chr7	+	63303691	63303883		TTTCAAGCAGAAATAAAAAGAGGAGCAGAAGAAACTCGAGGAGCTAAACATGAAGGCCGT	intergenic
ASHG19A3A045586	3.1327	1.64741	3.1327	up	78.0456	227.379	6.17845	7.82585	noncoding	ENST00000471604	RP11-698L23.1	Ensembl	785	chr11	-	92231315	92232100		GAATGAAAGTGGTGCTAAGTTGAATGAGCTGATGGATATGGATCACCAGCCCAAAAATCT	intronic antisense	NM_001008781	FAT3	protocadherin Fat 3	+	92085261	92629635
ASHG19A3A041290	4.0195	2.00702	4.0195	up	110.101	399.7	6.67383	8.68084	noncoding	AK098473		RNAdb	1658	chrX	+	99929124	99930782		CAGGGCTTCCTAGGGAAGTAGGAACAATGATAGCAAGACAGAAGATAAAAAGTTGTTTTA	natural antisense	NM_080737	SYTL4	synaptotagmin-like protein 4	-	99929488	99986522
ASHG19A3A041290	4.0195	2.00702	4.0195	up	110.101	399.7	6.67383	8.68084	noncoding	AK098473		RNAdb	1658	chrX	+	99929124	99930782		CAGGGCTTCCTAGGGAAGTAGGAACAATGATAGCAAGACAGAAGATAAAAAGTTGTTTTA	natural antisense	NM_001174068	SYTL4	synaptotagmin-like protein 4	-	99929488	99986522
ASHG19A3A041290	4.0195	2.00702	4.0195	up	110.101	399.7	6.67383	8.68084	noncoding	AK098473		RNAdb	1658	chrX	+	99929124	99930782		CAGGGCTTCCTAGGGAAGTAGGAACAATGATAGCAAGACAGAAGATAAAAAGTTGTTTTA	natural antisense	NM_001129896	SYTL4	synaptotagmin-like protein 4	-	99929488	99987135
ASHG19A3A008467	6.29441	2.65407	6.29441	up	295.699	1645.88	8.08642	10.7405	noncoding	ENST00000411857	RP11-215I23.4	Ensembl	1092	chr1	-	179425358	179426450	ENST00000512366,ENST00000505767,ENST00000404243,	AACAATCAGTCTTCAAATTTTGGACCCACGAAGGGAGGAAACTTTGGAGGCAGAAGTTCT	intronic antisense	NM_144696	AXDND1	axonemal dynein light chain domain-containing	+	179334854	179523870
CUST_525_PI426073487	2.06744	1.04784	2.06744	up	4007.32	8099.81	11.8869	12.9347	noncoding	uc.46-	uc.46	UCR	217	chr1	-	245017602	245017819	NM_004501,	ATTCCACAAGAGGAAGTGCCTGCGGGTTCCTTTTTTAGAAGCTTTGTGGGTTGATTTTTT	exon sense-overlapping	NM_004501	HNRNPU	heterogeneous nuclear ribonucleoprotein U	-	245013601	245027827
CUST_525_PI426073487	2.06744	1.04784	2.06744	up	4007.32	8099.81	11.8869	12.9347	noncoding	uc.46-	uc.46	UCR	217	chr1	-	245017602	245017819	NM_004501,	ATTCCACAAGAGGAAGTGCCTGCGGGTTCCTTTTTTAGAAGCTTTGTGGGTTGATTTTTT	exon sense-overlapping	NM_031844	HNRNPU	heterogeneous nuclear ribonucleoprotein U	-	245013601	245027827
ASHG19A3A013392	2.88461	1.52838	2.88461	up	4000.21	12079.3	11.8803	13.4087	noncoding	ENST00000416174	RP11-173A6.2	Ensembl	291	chr1	-	244857731	244858022		TAAAAATTGTAGACCGCAGATTCAGGCACAGATTCCGTGAAGGAACACCACCTAAACCCA	intronic antisense	NM_016076	PPPDE1	PPPDE peptidase domain-containing protein 1	+	244816351	244872334
ASHG19A3A013496	2.75872	1.464	2.75872	up	463.302	1087.9	8.71611	10.1801	noncoding	CR603904		NRED	2895	chr2	-	37326383	37329278		GCACTGCTGTGAAGAAAGCAGGAACTCAAAAGTTAAGAATTTTGAATGAGCCTATAAAAT	intergenic
ASHG19A3A020072	22.4741	4.49019	22.4741	up	209.227	4372.39	7.58962	12.0798	noncoding	X91348		RNAdb	1284	chr22	+	18958141	19018742	uc002zon.1,	GCACGGTGTCCCTGGGTTGGCCACCCAGCTTAGTTTTAAAATAAAATAATGTAATCTTGG	intergenic
ASHG19A3A010264	2.00659	1.00475	2.00659	up	2941.47	5552.68	11.4103	12.4151	noncoding	uc001hcx.2	AF321617	UCSC_knowngene	1726	chr1	-	205577072	205578798		GCAGGCTGGCTTTACAAAAGCACTGTAGCAAATTTACTACAAGTCTAAAAGTATACATAT	intergenic
ASHG19A3A026748	2.88394	1.52804	2.88394	up	305.663	762.3	8.13149	9.65953	noncoding	uc003jnb.1	AK056817	UCSC_knowngene	2757	chr5	-	42985502	42993435		ATATTTCAATAAAAATCTGCACTTTGTGAGTTGAGCCCCCTCAAAGAGACCTACAGACCC	intergenic
ASHG19A3A027773	11.6993	3.54835	11.6993	up	361.496	3854.6	8.37176	11.9201	noncoding	uc003mjv.3	CR598488	UCSC_knowngene	2883	chr5	-	178537853	178540736		TTCTGGCTTACCGATACAACAACCAATACATCTTTGTTCTGTAATGTAAAATTTGACTCC	exon sense-overlapping	NM_014244	ADAMTS2	A disintegrin and metalloproteinase with	-	178537851	178772431
ASHG19A3A032401	3.24097	1.69642	3.24097	up	579.799	1660.41	9.05037	10.7468	noncoding	ENST00000413921	RP11-101O6.2	Ensembl	941	chr1	+	155815157	155816415		CCTACACAACCTCATCAACAAGATTGCCAACTGGGATGCAGAGAAGAAAGACAGGAAAAA	intronic antisense	NM_001037533	GON4L	GON-4-like protein isoform a	-	155719509	155826972
ASHG19A3A032401	3.24097	1.69642	3.24097	up	579.799	1660.41	9.05037	10.7468	noncoding	ENST00000413921	RP11-101O6.2	Ensembl	941	chr1	+	155815157	155816415		CCTACACAACCTCATCAACAAGATTGCCAACTGGGATGCAGAGAAGAAAGACAGGAAAAA	intronic antisense	NM_032292	GON4L	GON-4-like protein isoform b	-	155734575	155826972
ASHG19A3A045901	2.2563	1.17396	2.2563	up	1834.36	3754.87	10.7101	11.8841	noncoding	HIT000043100		H-invDB	2355	chr11	-	133993528	133995882	NM_080392,NM_080391,	CCTCAACCACTCTCCTCATGATTGGAACAAAAGCAAACAAAAAAGAAATCTCTCTATAAA	intronic antisense	NM_032801	JAM3	junctional adhesion molecule C isoform 1	+	133938819	134021652
ASHG19A3A045901	2.2563	1.17396	2.2563	up	1834.36	3754.87	10.7101	11.8841	noncoding	HIT000043100		H-invDB	2355	chr11	-	133993528	133995882	NM_080392,NM_080391,	CCTCAACCACTCTCCTCATGATTGGAACAAAAGCAAACAAAAAAGAAATCTCTCTATAAA	intronic antisense	NM_001205329	JAM3	junctional adhesion molecule C isoform 2	+	133938819	134021652
ASHG19A3A013333	4.2287	2.08021	4.2287	up	801.51	3047.9	9.51958	11.5998	noncoding	U79271		NRED	1198	chr1	-	243663026	243664205		GTCGTGGTGCGTTGTGGCATATTAAGTCTAAACCAGATGAATGTAAATATCTCTTTGTAA	natural antisense	NM_006642	SDCCAG8	serologically defined colon cancer antigen 8	+	243419306	243663393
ASHG19A3A013333	4.2287	2.08021	4.2287	up	801.51	3047.9	9.51958	11.5998	noncoding	U79271		NRED	1198	chr1	-	243663026	243664205		GTCGTGGTGCGTTGTGGCATATTAAGTCTAAACCAGATGAATGTAAATATCTCTTTGTAA	exon sense-overlapping	NM_001206729	AKT3	RAC-gamma serine/threonine-protein kinase	-	243663020	244006886
ASHG19A3A013333	4.2287	2.08021	4.2287	up	801.51	3047.9	9.51958	11.5998	noncoding	U79271		NRED	1198	chr1	-	243663026	243664205		GTCGTGGTGCGTTGTGGCATATTAAGTCTAAACCAGATGAATGTAAATATCTCTTTGTAA	exon sense-overlapping	NM_181690	AKT3	RAC-gamma serine/threonine-protein kinase	-	243651534	244006584
ASHG19A3A013333	4.2287	2.08021	4.2287	up	801.51	3047.9	9.51958	11.5998	noncoding	U79271		NRED	1198	chr1	-	243663026	243664205		GTCGTGGTGCGTTGTGGCATATTAAGTCTAAACCAGATGAATGTAAATATCTCTTTGTAA	exon sense-overlapping	NM_005465	AKT3	RAC-gamma serine/threonine-protein kinase	-	243663020	244006584
ASHG19A3A040159	2.30302	1.20353	2.30302	up	608.818	1210.26	9.12363	10.3272	noncoding	ENST00000340681	RP5-961K14.2	Ensembl	1129	chrX	-	95325648	95326777		GGTCATCTTCTGGATCATTCCATTCTGGTTCCCATTCAAGTTCAAAAAAGAAATAAGGCA	intergenic
ASHG19A3A049783	2.18759	1.12934	2.18759	up	87.0274	181.553	6.3368	7.46614	noncoding	uc001voi.1	AK123584	UCSC_knowngene	2796	chr13	-	100143728	100148992		TACTTTTCAAAGTCCTCTTCTCTGTTCCAGACCACTATGGGCAACTCTCTATCTATTCGA	intergenic
ASHG19A3A051746	2.47738	1.30881	2.47738	up	498.943	1058.83	8.83238	10.1412	noncoding	NR_023938	C14orf132	RefSeq_NR	7504	chr14	+	96505661	96560133		GACTTCTCTACAGTGAAGACTCTTTCTTAATAAAGGATTTCGCTGTGCTCTTTTGATTAA	intergenic
ASHG19A3A047899	2.18385	1.12687	2.18385	up	331.192	636.315	8.25129	9.37816	noncoding	AK093735		misc_RNA	2561	chr12	-	94697526	94700087		CTTCTTCTTTGTAGGTTGGGATATCCTTGGCATAGAGAAGCTTATTAGTTGGTGCTTCCT	natural antisense	NM_005761	PLXNC1	plexin-C1 precursor	+	94542498	94701451
ASHG19A3A031927	2.0003	1.00022	2.0003	up	122.113	227.131	6.82363	7.82385	noncoding	ENST00000458693	RP1-249I4.2	Ensembl	465	chr6	+	110147724	110149988		GTTTGGCCCCCTAGCATTTTTTATATGTTCTGTTGAGATAAGTATTGCTTAAATGAATCG	intergenic
ASHG19A3A012632	2.07852	1.05556	2.07852	up	484.044	863.93	8.78483	9.84039	noncoding	NR_024279	FLJ37453	RefSeq_NR	2732	chr1	-	16160709	16174642		CGGGTTTATAGCCCATTATTTATATCGGAGCCATAAACTTGAACAATAGATTGGAATATC	natural antisense	NM_015001	SPEN	msx2-interacting protein	+	16174358	16266950
ASHG19A3A038014	3.12942	1.6459	3.12942	up	329.595	892.252	8.2441	9.89	noncoding	ENST00000392902	RP11-355O1.7	Ensembl	381	chr9	-	125791651	125792032		AGGCAAAGTTAGGGACAAGCTCAATACCTTGTCTTGTTTGACAAAGCTACATATGACAAA	intronic antisense	NM_012197	RABGAP1	rab GTPase-activating protein 1	+	125703287	125867147
ASHG19A3A034733	2.45754	1.29721	2.45754	up	211.028	466.011	7.60173	8.89895	noncoding	AK023774		NRED	3049	chr1	-	25658549	25661597		ATATGGTTCGCAGTGTGGGACTCCTGAACTCCAAGATGTCTTTGAAAGTAGCCATTTTTT	intergenic
ASHG19A3L0000746	4.32899	2.11403	4.32899	up	134.571	522.86	6.96349	9.07752	noncoding	AK296158	lincRNA-TMEM30B-1	lincRNA	1756	chr14	+	61654286	62016579	NM_006255,	AAACTTTTCCTATGTGTCTCCAGAATTGCAACCATAGCCTTATGGGGAGTGAGAGAGAGG	exon sense-overlapping	NM_006255	PRKCH	protein kinase C eta type	+	61788514	62017698
ASHG19A3L0000746	4.32899	2.11403	4.32899	up	134.571	522.86	6.96349	9.07752	noncoding	AK296158	lincRNA-TMEM30B-1	lincRNA	1756	chr14	+	61654286	62016579	NM_006255,	AAACTTTTCCTATGTGTCTCCAGAATTGCAACCATAGCCTTATGGGGAGTGAGAGAGAGG	intronic antisense	NM_001017970	TMEM30B	cell cycle control protein 50B	-	61744088	61748530
ASHG19A3A024143	2.52055	1.33374	2.52055	up	3777.37	9457.45	11.79	13.1238	noncoding	ENST00000486904	RP11-731J8.1	Ensembl	505	chr4	-	47492983	47493488		AACCTGAGCTGCTGGAACCTCTTCCCTATGAACACATGGCATCAGAGGTGTTAACAAAAT	intronic antisense	NM_020453	ATP10D	probable phospholipid-transporting ATPase VD	+	47487409	47595503
ASHG19A3A043553	3.66946	1.87557	3.66946	up	899.638	2954.04	9.68289	11.5585	noncoding	ENST00000441526	RP11-336A10.7	Ensembl	196	chr10	+	5666893	5667089		TTGAGGACCAAGGAGGCGGTGCTGAAAGGTGTCCACAGCCACAAAAAGTAGATCCGCCGT	intergenic
ASHG19A3A011719	3.22994	1.69151	3.22994	up	71.2143	214.033	6.04039	7.7319	noncoding	DQ786272		misc_RNA	971	chr1	-	225965588	225978167		CTAACACCTTGGTTAATTAAAGACAGAAAATGGGCAGGGGTGTCACAGAAGTATGCAAGG	natural antisense	NM_003133	SRP9	signal recognition particle 9 kDa protein	+	225965514	225978168
ASHG19A3A011719	3.22994	1.69151	3.22994	up	71.2143	214.033	6.04039	7.7319	noncoding	DQ786272		misc_RNA	971	chr1	-	225965588	225978167		CTAACACCTTGGTTAATTAAAGACAGAAAATGGGCAGGGGTGTCACAGAAGTATGCAAGG	natural antisense	NM_001130440	SRP9	signal recognition particle 9 kDa protein	+	225965514	225978168
ASHG19A3A007507	2.51327	1.32957	2.51327	up	1973.63	4592.07	10.8235	12.1531	noncoding	NR_027356	LOC645166	RefSeq_NR	592	chr1	+	148928285	148951595	ENST00000452399,	TGCGGCCAAGACTCCGTCCTGCAAGACTCTTTGGCAGTTGCACTGGGTACTGGCTGAGTT	intergenic
ASHG19A3A035715	2.27606	1.18654	2.27606	up	828.053	1662.82	9.56185	10.7484	noncoding	ENST00000451239	RP11-345I18.3	Ensembl	222	chr1	+	179170839	179171061		AGACAAAAGGACTCTTTGAGACATCAAGACCCTCTACAACACCTCCATTGAGGAAATGCC	intronic antisense	NM_001168236	ABL2	tyrosine-protein kinase ABL2 isoform f	-	179068461	179198819
ASHG19A3A035715	2.27606	1.18654	2.27606	up	828.053	1662.82	9.56185	10.7484	noncoding	ENST00000451239	RP11-345I18.3	Ensembl	222	chr1	+	179170839	179171061		AGACAAAAGGACTCTTTGAGACATCAAGACCCTCTACAACACCTCCATTGAGGAAATGCC	intronic antisense	NM_001168237	ABL2	tyrosine-protein kinase ABL2 isoform g	-	179068461	179198819
ASHG19A3A035715	2.27606	1.18654	2.27606	up	828.053	1662.82	9.56185	10.7484	noncoding	ENST00000451239	RP11-345I18.3	Ensembl	222	chr1	+	179170839	179171061		AGACAAAAGGACTCTTTGAGACATCAAGACCCTCTACAACACCTCCATTGAGGAAATGCC	intronic antisense	NM_007314	ABL2	tyrosine-protein kinase ABL2 isoform b	-	179068461	179198819
ASHG19A3A035715	2.27606	1.18654	2.27606	up	828.053	1662.82	9.56185	10.7484	noncoding	ENST00000451239	RP11-345I18.3	Ensembl	222	chr1	+	179170839	179171061		AGACAAAAGGACTCTTTGAGACATCAAGACCCTCTACAACACCTCCATTGAGGAAATGCC	intronic antisense	NM_001136001	ABL2	tyrosine-protein kinase ABL2 isoform e	-	179079715	179198819
ASHG19A3A035715	2.27606	1.18654	2.27606	up	828.053	1662.82	9.56185	10.7484	noncoding	ENST00000451239	RP11-345I18.3	Ensembl	222	chr1	+	179170839	179171061		AGACAAAAGGACTCTTTGAGACATCAAGACCCTCTACAACACCTCCATTGAGGAAATGCC	intronic antisense	NM_001168238	ABL2	tyrosine-protein kinase ABL2 isoform h	-	179068461	179198819
ASHG19A3L0000325	3.62603	1.85839	3.62603	up	117.525	383.858	6.76585	8.62424	noncoding	AK302893	lincRNA-MICAL2-1	lincRNA	3585	chr11	+	12115542	12284466		CCTTGATCATGAAACAATACCATGAGGGGGCCTCTGTCACCTTTGAAAAGAACACTTTTT	exon sense-overlapping	NM_014632	MICAL2	protein MICAL-2	+	12132137	12285331
ASHG19A3A048395	2.1583	1.10989	2.1583	up	93.1407	190.534	6.43482	7.54471	noncoding	uc001rbb.3	TVAS4	UCSC_knowngene	2740	chr12	+	13068125	13070865	BC042436,	TTGTAGATTGCTCTCTTTGGAAATTCTGTGGCCCAACCTCGTGGCTGTTTTCTGGAATTC	intergenic
ASHG19A3A049079	3.74055	1.90325	3.74055	up	374.559	1209.78	8.4235	10.3268	noncoding	NR_027345	NCRNA00173	RefSeq_NR	1597	chr12	+	116971226	116973326		TTATGTCCTGTGTAGCAGCAGGTAGTGTGGCTTTGAGAAAATAAAATGGCCACCTTGCTC	intergenic
ASHG19A3A015830	2.72542	1.44648	2.72542	up	310.703	737.328	8.15903	9.60551	noncoding	NR_003683	ALMS1P	RefSeq_NR	1608	chr2	+	73872045	73912692	NM_015120,ENST00000295136,	TTCCTGGCTGTCCAGAAGAACAAGCCTATCAGCAAGAAGGAAATGATTCAGAGGTCCAAA	intergenic
ASHG19A3A034674	3.0998	1.63217	3.0998	up	1297.17	3632.31	10.207	11.8392	noncoding	ENST00000450915	AC006988.3	Ensembl	1403	chr7	+	88268327	88269730		ATGATATGAGATGGAGAATTGCCATGGATGTCATCAAAGCAGTGGACAAGAAGGCTGCTG	intergenic
ASHG19A3L0002942	2.02264	1.01624	2.02264	up	149.848	279.392	7.1201	8.13634	noncoding	BX115115	lincRNA-ACTR2	lincRNA	649	chr2	-	65501495	65502138		CAAGGTCCTTTAAATTGTCACCATAGTTTAGGTTCCACTCCTTCCTAATAGCTCTTAAAT	intergenic
ASHG19A3A014897	2.12902	1.09019	2.12902	up	52.4138	110.764	5.60051	6.6907	noncoding	ENST00000396848	AC010138.3	Ensembl	867	chr2	-	204637353	204638225	ENST00000428039,ENST00000399556,	ATCCTTCAAAAAACAAGAAAAAACTCCCAAAACACCAAAAGGACCTAGTTCTGTAGAAGA	intergenic
ASHG19A3A017261	7.92123	2.98572	7.92123	up	96.0926	669.703	6.47758	9.4633	noncoding	ENST00000455216	RP4-673D20.4	Ensembl	493	chr20	-	1702690	1703183		TAACACCTTCCATTCATTGAGCAACAATCGGGTGTGGTGGTGGGTACGCATTTTCATGAA	intergenic
ASHG19A3A025915	3.41966	1.77385	3.41966	up	318.055	939.725	8.19545	9.9693	noncoding	ENST00000514955	AC004049.3	Ensembl	1862	chr4	+	113377079	113378941	NM_014828,	CAGGGATGTATTCTTGGCCTGGGTAGCCTCTAGAAATTCAAACACAGTGGTGTTTGTGAA	intergenic
ASHG19A3A013909	2.47507	1.30747	2.47507	up	254.395	554.782	7.8616	9.16906	noncoding	ENST00000265882	AC016716.1	Ensembl	708	chr2	-	80389553	80390261	NM_016090,	CAGTAGCAGAGATGGAAAATGGCGCTCATCTCGACACTAACACATGTTAAAAGCACATTG	intronic antisense	NM_001164883	CTNNA2	catenin alpha-2 isoform 2	+	79740059	80875988
ASHG19A3A013909	2.47507	1.30747	2.47507	up	254.395	554.782	7.8616	9.16906	noncoding	ENST00000265882	AC016716.1	Ensembl	708	chr2	-	80389553	80390261	NM_016090,	CAGTAGCAGAGATGGAAAATGGCGCTCATCTCGACACTAACACATGTTAAAAGCACATTG	intronic antisense	NM_004389	CTNNA2	catenin alpha-2 isoform 1	+	79740059	80875988
ASHG19A3A020137	2.03597	1.02572	2.03597	up	41.2043	84.3636	5.2542	6.27992	noncoding	ENST00000450652	AC002472.11	Ensembl	563	chr22	+	21385645	21398258		TATTCGAGGAGAACATTCCAGCCGATGAGGAAGGCCCACAGCTCGCCCATGGATACGTAG	natural antisense	NM_004173	SLC7A4	cationic amino acid transporter 4	-	21383006	21386847
ASHG19A3A007957	2.74739	1.45806	2.74739	up	1386.94	3415.4	10.295	11.7531	noncoding	ENST00000412454	AC013248.1	Ensembl	459	chr17	-	14608392	14608851		TTGAACAGACAGAAGGATGTAAAGGATGGAAAATATAACCAGGTCCTGGCCAACGGTCTG	intergenic
ASHG19A3A030796	2.19491	1.13416	2.19491	up	769.393	1474.18	9.45353	10.5877	noncoding	CR601496		misc_RNA	891	chr6	-	163834101	163834992		GTCGGCAGTCCCTAAATCTACGTCTGCATTTTGTTGCAAATCCTTTATAACATTCCATTA	bidirectional	NM_006775	QKI	protein quaking isoform HQK-5	+	163835674	163999628
ASHG19A3A030796	2.19491	1.13416	2.19491	up	769.393	1474.18	9.45353	10.5877	noncoding	CR601496		misc_RNA	891	chr6	-	163834101	163834992		GTCGGCAGTCCCTAAATCTACGTCTGCATTTTGTTGCAAATCCTTTATAACATTCCATTA	bidirectional	NM_206853	QKI	protein quaking isoform HQK-6	+	163835674	163999628
ASHG19A3A030796	2.19491	1.13416	2.19491	up	769.393	1474.18	9.45353	10.5877	noncoding	CR601496		misc_RNA	891	chr6	-	163834101	163834992		GTCGGCAGTCCCTAAATCTACGTCTGCATTTTGTTGCAAATCCTTTATAACATTCCATTA	bidirectional	NM_206854	QKI	protein quaking isoform HQK-7	+	163835674	163999628
ASHG19A3A030796	2.19491	1.13416	2.19491	up	769.393	1474.18	9.45353	10.5877	noncoding	CR601496		misc_RNA	891	chr6	-	163834101	163834992		GTCGGCAGTCCCTAAATCTACGTCTGCATTTTGTTGCAAATCCTTTATAACATTCCATTA	bidirectional	NM_206855	QKI	protein quaking isoform HQK-7B	+	163835674	163999628
ASHG19A3A045228	3.48656	1.8018	3.48656	up	1768.51	5727.76	10.6569	12.4587	noncoding	ENST00000411291	AP000640.2	Ensembl	327	chr11	-	59473529	59473856		TTTATTTTCATACTGCCATGTAGAGTTTGAGACCAGCCTGAGCAACATGGCAGAAACCTG	intergenic
ASHG19A3A032627	4.14468	2.05126	4.14468	up	297.43	1062.29	8.09502	10.1463	noncoding	uc003tbd.2	BC041636	UCSC_knowngene	1130	chr7	-	30555927	30601744	ENST00000434399,	TCCTAAACTGTAGCTTGCAATGTGCCTGTTTCCAGAAACCAAGGTGAAAGTGCTTTTAGA	intergenic
ASHG19A3A043950	2.80023	1.48555	2.80023	up	432.978	1038.5	8.62398	10.1095	noncoding	ENST00000435916	RP11-56A21.4	Ensembl	1838	chr10	+	52024737	52026575	NM_001378,	CATTTGACTGGACAGTAAAGCTTTGGACAACTAAGAATAACAAGCCTTTGTATTCATTTG	intergenic
ASHG19A3A044141	2.29642	1.19939	2.29642	up	182.94	379.585	7.404	8.60339	noncoding	ENST00000416294	RP11-443A13.4	Ensembl	294	chr10	+	78596325	78596619		TCTTCTCCTGTGTCATTCTGGGCTTTGCCTGGGGACTTGGGGCTCTTCGGTTTGATGGCT	intergenic
ASHG19A3A035947	6.21874	2.63662	6.21874	up	307.799	1693.75	8.1427	10.7793	noncoding	uc010mam.2	AF131817	UCSC_knowngene	1432	chr8	-	92968729	92970161		GGTCTGTCAACCTGTGAATCTTTAAAGTATGATTCAGGTATTGTTGTATTCTTTACTGTG	exon sense-overlapping	NM_001198626	RUNX1T1	protein CBFA2T1 isoform B	-	92967194	93107882
ASHG19A3A035947	6.21874	2.63662	6.21874	up	307.799	1693.75	8.1427	10.7793	noncoding	uc010mam.2	AF131817	UCSC_knowngene	1432	chr8	-	92968729	92970161		GGTCTGTCAACCTGTGAATCTTTAAAGTATGATTCAGGTATTGTTGTATTCTTTACTGTG	exon sense-overlapping	NM_001198631	RUNX1T1	protein CBFA2T1 isoform B	-	92967194	93107882
ASHG19A3A035947	6.21874	2.63662	6.21874	up	307.799	1693.75	8.1427	10.7793	noncoding	uc010mam.2	AF131817	UCSC_knowngene	1432	chr8	-	92968729	92970161		GGTCTGTCAACCTGTGAATCTTTAAAGTATGATTCAGGTATTGTTGTATTCTTTACTGTG	exon sense-overlapping	NM_001198630	RUNX1T1	protein CBFA2T1 isoform B	-	92967194	93107490
ASHG19A3A035947	6.21874	2.63662	6.21874	up	307.799	1693.75	8.1427	10.7793	noncoding	uc010mam.2	AF131817	UCSC_knowngene	1432	chr8	-	92968729	92970161		GGTCTGTCAACCTGTGAATCTTTAAAGTATGATTCAGGTATTGTTGTATTCTTTACTGTG	exon sense-overlapping	NM_001198629	RUNX1T1	protein CBFA2T1 isoform B	-	92967194	93107490
ASHG19A3A035947	6.21874	2.63662	6.21874	up	307.799	1693.75	8.1427	10.7793	noncoding	uc010mam.2	AF131817	UCSC_knowngene	1432	chr8	-	92968729	92970161		GGTCTGTCAACCTGTGAATCTTTAAAGTATGATTCAGGTATTGTTGTATTCTTTACTGTG	exon sense-overlapping	NM_004349	RUNX1T1	protein CBFA2T1 isoform A	-	92967194	93075191
ASHG19A3A035947	6.21874	2.63662	6.21874	up	307.799	1693.75	8.1427	10.7793	noncoding	uc010mam.2	AF131817	UCSC_knowngene	1432	chr8	-	92968729	92970161		GGTCTGTCAACCTGTGAATCTTTAAAGTATGATTCAGGTATTGTTGTATTCTTTACTGTG	exon sense-overlapping	NM_001198627	RUNX1T1	protein CBFA2T1 isoform B	-	92967194	93107882
ASHG19A3A035947	6.21874	2.63662	6.21874	up	307.799	1693.75	8.1427	10.7793	noncoding	uc010mam.2	AF131817	UCSC_knowngene	1432	chr8	-	92968729	92970161		GGTCTGTCAACCTGTGAATCTTTAAAGTATGATTCAGGTATTGTTGTATTCTTTACTGTG	exon sense-overlapping	NM_001198625	RUNX1T1	protein CBFA2T1 isoform A	-	92967194	93107882
ASHG19A3A035947	6.21874	2.63662	6.21874	up	307.799	1693.75	8.1427	10.7793	noncoding	uc010mam.2	AF131817	UCSC_knowngene	1432	chr8	-	92968729	92970161		GGTCTGTCAACCTGTGAATCTTTAAAGTATGATTCAGGTATTGTTGTATTCTTTACTGTG	exon sense-overlapping	NM_001198679	RUNX1T1	protein CBFA2T1 isoform F	-	92967194	93107882
ASHG19A3A035947	6.21874	2.63662	6.21874	up	307.799	1693.75	8.1427	10.7793	noncoding	uc010mam.2	AF131817	UCSC_knowngene	1432	chr8	-	92968729	92970161		GGTCTGTCAACCTGTGAATCTTTAAAGTATGATTCAGGTATTGTTGTATTCTTTACTGTG	exon sense-overlapping	NM_001198632	RUNX1T1	protein CBFA2T1 isoform A	-	92967194	93107490
ASHG19A3A035947	6.21874	2.63662	6.21874	up	307.799	1693.75	8.1427	10.7793	noncoding	uc010mam.2	AF131817	UCSC_knowngene	1432	chr8	-	92968729	92970161		GGTCTGTCAACCTGTGAATCTTTAAAGTATGATTCAGGTATTGTTGTATTCTTTACTGTG	exon sense-overlapping	NM_001198628	RUNX1T1	protein CBFA2T1 isoform B	-	92967194	93111916
ASHG19A3A035947	6.21874	2.63662	6.21874	up	307.799	1693.75	8.1427	10.7793	noncoding	uc010mam.2	AF131817	UCSC_knowngene	1432	chr8	-	92968729	92970161		GGTCTGTCAACCTGTGAATCTTTAAAGTATGATTCAGGTATTGTTGTATTCTTTACTGTG	exon sense-overlapping	NM_175634	RUNX1T1	protein CBFA2T1 isoform B	-	92967194	93115454
ASHG19A3A035947	6.21874	2.63662	6.21874	up	307.799	1693.75	8.1427	10.7793	noncoding	uc010mam.2	AF131817	UCSC_knowngene	1432	chr8	-	92968729	92970161		GGTCTGTCAACCTGTGAATCTTTAAAGTATGATTCAGGTATTGTTGTATTCTTTACTGTG	exon sense-overlapping	NM_001198633	RUNX1T1	protein CBFA2T1 isoform D	-	92967194	93115454
ASHG19A3A035947	6.21874	2.63662	6.21874	up	307.799	1693.75	8.1427	10.7793	noncoding	uc010mam.2	AF131817	UCSC_knowngene	1432	chr8	-	92968729	92970161		GGTCTGTCAACCTGTGAATCTTTAAAGTATGATTCAGGTATTGTTGTATTCTTTACTGTG	exon sense-overlapping	NM_001198634	RUNX1T1	protein CBFA2T1 isoform E	-	92967194	93107882
ASHG19A3A035947	6.21874	2.63662	6.21874	up	307.799	1693.75	8.1427	10.7793	noncoding	uc010mam.2	AF131817	UCSC_knowngene	1432	chr8	-	92968729	92970161		GGTCTGTCAACCTGTGAATCTTTAAAGTATGATTCAGGTATTGTTGTATTCTTTACTGTG	exon sense-overlapping	NM_175636	RUNX1T1	protein CBFA2T1 isoform C	-	92967194	93029908
ASHG19A3A035947	6.21874	2.63662	6.21874	up	307.799	1693.75	8.1427	10.7793	noncoding	uc010mam.2	AF131817	UCSC_knowngene	1432	chr8	-	92968729	92970161		GGTCTGTCAACCTGTGAATCTTTAAAGTATGATTCAGGTATTGTTGTATTCTTTACTGTG	exon sense-overlapping	NM_175635	RUNX1T1	protein CBFA2T1 isoform C	-	92967194	93107490
ASHG19A3A029752	2.30661	1.20578	2.30661	up	600.582	1196.33	9.10519	10.311	noncoding	uc010jub.1	AK293020	UCSC_knowngene	375	chr6	-	32546122	32546497		CCAGCCAGCAAGTCAATCAGAACTCTTTCTTCATCTCGTCTACAATATTTTGTATTTATA	intergenic
ASHG19A3A007112	2.58911	1.37246	2.58911	up	8183.04	25628.7	12.93	14.3025	noncoding	NR_003038	SNHG5	RefSeq_NR	524	chr6	-	86386725	86388451	ENST00000414002,	TGGTTAAAACCTGACACTTTTAACAGTGAACAGCGTTCTGAGTGTGGACGAGTAGCCAGT	intergenic
ASHG19A3A046414	2.21847	1.14957	2.21847	up	37.0864	82.7059	5.0965	6.24607	noncoding	BC011987		misc_RNA	1080	chr11	+	57296105	57298215		ATAGACAACTCTGTCAACTTTTTGCCCATCCGCTCATGGATGTCCAGGTACTTAGAGACA	natural antisense	NM_012456	TIMM10	mitochondrial import inner membrane translocase	-	57295935	57298232
ASHG19A3A032643	4.06724	2.02405	4.06724	up	49.1039	189.118	5.50713	7.53118	noncoding	uc003tcw.2	AK026768	UCSC_knowngene	1899	chr7	-	32620554	32758780		TTTACCCCGATCACAGAAACCATACCAACTGAAAGACAAATCAGCATCTTGCTGGACGAC	intronic antisense	NM_015060	AVL9	late secretory pathway protein AVL9 homolog	+	32535175	32623779
ASHG19A3A008634	2.48077	1.31079	2.48077	up	130.203	297.089	6.91542	8.22621	noncoding	ENST00000411509	RP11-538D16.2	Ensembl	2463	chr1	-	182031811	182038388		CAGAGAGCCGGGAGGCTCCAGCCTGGTCCAGAGAGAAAGAGACAGCACCTGCCCAAGGCG	intergenic
ASHG19A3A044474	3.14798	1.65443	3.14798	up	513.103	1413.93	8.87339	10.5278	noncoding	ENST00000429231	RP11-451M19.2	Ensembl	479	chr10	+	111567408	111567887		CTTTGTAAGAACCAATGAGAAGGAGCCTGGGCTGCTGGAAACTCTTCCTTATGATTCATG	intergenic
ASHG19A3A015959	2.02326	1.01668	2.02326	up	1460.91	2634.54	10.3853	11.402	noncoding	HIT000299580		H-invDB	376	chr2	+	90077751	90078313		CCAGAGGGAACCATGGAAACCCCAGCGCAGCTTCTCTTCCTCCTGCTACTCTGGCTCCCA	intergenic
ASHG19A3A029992	2.21791	1.1492	2.21791	up	55.9966	121.907	5.69321	6.84241	noncoding	ENST00000407830	RP11-28H17.4	Ensembl	1173	chr6	-	49533636	49547879		TAATAATCTGTTCACGACAGGTACAGAGACCACAGCCTCCACATTGCACTGGGGAATTTT	intergenic
ASHG19A3A014346	2.12852	1.08985	2.12852	up	465.431	848.572	8.72304	9.81289	noncoding	uc002trf.1	AK054990	UCSC_knowngene	2070	chr2	-	131174327	131185559		GGCATAAGTCTACTCACTTATATCTGTTTGTCTGGAACATAACCCATGTTTGTTTTTACA	intergenic
ASHG19A3A020633	2.24961	1.16968	2.24961	up	2006.1	4162.84	10.8479	12.0176	noncoding	NR_026981	RPL23AP82	RefSeq_NR	1520	chr22	+	51195513	51238064	NR_029406,NR_026982,NR_024529,NR_024528,NR_000029,ENST00000487264,ENST00000416673,	CACCTAAACTGAGTCCAGCTGGCTAACTCTAAATATATGTGTATCTTTTCAGCATAAAAA	intronic antisense	NM_007081	RABL2B	rab-like protein 2B isoform 2	-	51205919	51222087
ASHG19A3A020633	2.24961	1.16968	2.24961	up	2006.1	4162.84	10.8479	12.0176	noncoding	NR_026981	RPL23AP82	RefSeq_NR	1520	chr22	+	51195513	51238064	NR_029406,NR_026982,NR_024529,NR_024528,NR_000029,ENST00000487264,ENST00000416673,	CACCTAAACTGAGTCCAGCTGGCTAACTCTAAATATATGTGTATCTTTTCAGCATAAAAA	intronic antisense	NM_001130922	RABL2B	rab-like protein 2B isoform 2	-	51205919	51222087
ASHG19A3A020633	2.24961	1.16968	2.24961	up	2006.1	4162.84	10.8479	12.0176	noncoding	NR_026981	RPL23AP82	RefSeq_NR	1520	chr22	+	51195513	51238064	NR_029406,NR_026982,NR_024529,NR_024528,NR_000029,ENST00000487264,ENST00000416673,	CACCTAAACTGAGTCCAGCTGGCTAACTCTAAATATATGTGTATCTTTTCAGCATAAAAA	intronic antisense	NM_001130919	RABL2B	rab-like protein 2B isoform 1	-	51205919	51222087
ASHG19A3A020633	2.24961	1.16968	2.24961	up	2006.1	4162.84	10.8479	12.0176	noncoding	NR_026981	RPL23AP82	RefSeq_NR	1520	chr22	+	51195513	51238064	NR_029406,NR_026982,NR_024529,NR_024528,NR_000029,ENST00000487264,ENST00000416673,	CACCTAAACTGAGTCCAGCTGGCTAACTCTAAATATATGTGTATCTTTTCAGCATAAAAA	intronic antisense	NM_001003789	RABL2B	rab-like protein 2B isoform 1	-	51205919	51222087
ASHG19A3A020633	2.24961	1.16968	2.24961	up	2006.1	4162.84	10.8479	12.0176	noncoding	NR_026981	RPL23AP82	RefSeq_NR	1520	chr22	+	51195513	51238064	NR_029406,NR_026982,NR_024529,NR_024528,NR_000029,ENST00000487264,ENST00000416673,	CACCTAAACTGAGTCCAGCTGGCTAACTCTAAATATATGTGTATCTTTTCAGCATAAAAA	intronic antisense	NM_001130920	RABL2B	rab-like protein 2B isoform 1	-	51205919	51222087
ASHG19A3A020633	2.24961	1.16968	2.24961	up	2006.1	4162.84	10.8479	12.0176	noncoding	NR_026981	RPL23AP82	RefSeq_NR	1520	chr22	+	51195513	51238064	NR_029406,NR_026982,NR_024529,NR_024528,NR_000029,ENST00000487264,ENST00000416673,	CACCTAAACTGAGTCCAGCTGGCTAACTCTAAATATATGTGTATCTTTTCAGCATAAAAA	natural antisense	NM_001130921	RABL2B	rab-like protein 2B isoform 1	-	51205919	51222087
ASHG19A3A020633	2.24961	1.16968	2.24961	up	2006.1	4162.84	10.8479	12.0176	noncoding	NR_026981	RPL23AP82	RefSeq_NR	1520	chr22	+	51195513	51238064	NR_029406,NR_026982,NR_024529,NR_024528,NR_000029,ENST00000487264,ENST00000416673,	CACCTAAACTGAGTCCAGCTGGCTAACTCTAAATATATGTGTATCTTTTCAGCATAAAAA	intronic antisense	NM_001130923	RABL2B	rab-like protein 2B isoform 3	-	51205919	51222087
ASHG19A3A029308	2.96014	1.56567	2.96014	up	68.8208	192.008	5.99134	7.557	noncoding	AL137279		misc_RNA	2353	chr6	-	905471	909594		GGGCTTGGCTGGCTTCAACAATTGAAACAAATGCAGCATCTCTCATATTAAAAGTGTTAC	intergenic
ASHG19A3A000176	5.30809	2.40819	5.30809	up	36.363	182.748	5.06827	7.47647	noncoding	ENST00000425692	AC022596.6	Ensembl	1426	chr17	-	16721455	16725806	NM_005557,NM_000526,	TTGAGCTGCAGTCCCAGCTCAGCATAAAGCATCCCTGGAGAACAGCCTGGAGGAGACCAA	intergenic
ASHG19A3A030014	3.04732	1.60754	3.04732	up	3532.83	11123.1	11.6888	13.2963	noncoding	ENST00000398713	RP11-793K1.1	Ensembl	384	chr6	-	51401957	51402341		CGTCATGGACCATGAAGAAGCGAGTCAAAAACACAGGAGGGAAAATCCTGGGATTCTTTT	intergenic
ASHG19A3A032944	2.10305	1.07248	2.10305	up	1546.76	2912.28	10.4685	11.541	noncoding	NR_026873	NCRNA00174	RefSeq_NR	4426	chr7	-	65841031	65865395	ENST00000421767,	GGAAAACCCCATCTCTTCTTTTAACCTTGAGAGTGGATTTCTGACGAATTGATAATAAAT	intergenic
ASHG19A3A023515	2.0058	1.00418	2.0058	up	45.7558	91.9437	5.40628	6.41045	noncoding	ENST00000480132	RP13-81O8.1	Ensembl	545	chr3	+	169855175	169856376		TTCAGTTTCATGTGTGTTCCGTCTCTACATCATTAACTGATGCTCAAAAGCTATACCTTC	intronic antisense	NM_024947	PHC3	polyhomeotic-like protein 3	-	169805367	169899537
ASHG19A3A029316	2.33197	1.22155	2.33197	up	117.507	253.246	6.76535	7.9869	noncoding	ENST00000411954	BX284650.2	Ensembl	1057	chr1	+	143687242	143716941		CCAGATTTGTATTCCAAATGGATAGTTTGATTATAAAAATCACATCCCTTCAGCCTGCAA	intergenic
ASHG19A3A048309	5.03623	2.33235	5.03623	up	98.0916	446.998	6.50409	8.83644	noncoding	uc010sgb.1	UNQ2963	UCSC_knowngene	2086	chr12	+	7261166	7273623		GAGCCGGGGAGACTTCCCAGAGAGCTGGTTGGGGGTTATGAAAGTGGCCTCACGGCTGAT	intronic antisense	NM_016546	C1RL	complement C1r subcomponent-like protein	-	7247145	7261869
ASHG19A3A044590	3.86293	1.9497	3.86293	up	437.876	1473.38	8.63682	10.5865	noncoding	ENST00000402743	RP11-570P14.1	Ensembl	360	chr1	-	44587824	44588184	NM_006938,	GTATTTTATTCTACTAGACAGTTTACCTCTGGATACACTACTTGTGGATGTTGAACCTAA	intronic antisense	NM_173484	KLF17	Krueppel-like factor 17	+	44584521	44600809
ASHG19A3A026921	2.44684	1.29092	2.44684	up	1588.08	3526.86	10.5054	11.7963	noncoding	uc010iyn.2	SMA4	UCSC_knowngene	1178	chr5	-	70422488	70585523	uc011crg.1,uc011cnn.1,uc003jxm.2,uc003jxm.2,NR_029426,NR_027386,NR_027028,NR_024054,NR_003660,NR_003504,ENST00000513408,ENST00000512685,ENST00000508727,ENST00000423899,ENST00000380734,ENST00000355132,	TTGGTGTAAGACATCACAATCCCATTATTCAGAGCGCGTATGGAGTGGAAACGCTTGTAG	intergenic
ASHG19A3A026311	2.18202	1.12566	2.18202	up	82.5895	172.175	6.25997	7.38564	noncoding	NR_003679	NBLA00301	RefSeq_NR	766	chr4	+	174451608	174462980		AAAGAAAGAAAGAAAGAAAACGCAGGTATTGCTTTTCGAAGTGCTTTGTAGGTAATCGAG	bidirectional	NM_021973	HAND2	heart- and neural crest derivatives-expressed	-	174447651	174451378
ASHG19A3A051449	2.63401	1.39726	2.63401	up	317.451	729.236	8.19272	9.58998	noncoding	ENST00000483820	RP11-132J14.1	Ensembl	769	chr14	+	56010118	56010887		AAGTCTGTGGCTCACATTGCCCATATGGAAAAGGCAAAGGCTAAAGAACTTGCCACCAAA	intergenic
ASHG19A3A029551	2.28889	1.19465	2.28889	up	114.928	243.918	6.73522	7.92987	noncoding	NR_026776	LOC100270746	RefSeq_NR	954	chr6	-	26987145	26988085		TGTGGATAAGAATGAGATATTAAGGCAGAATTAGCTGGGCTTTTAATCCCAAACAGTGTT	intergenic
ASHG19A3A037571	3.4228	1.77518	3.4228	up	1486.47	4707.32	10.4094	12.1846	noncoding	ENST00000457473	RP11-28P17.2	Ensembl	361	chr9	-	75270747	75271108		TACTAAGACTTTGAGAATCACTACAAGAAAAAACTCCATGTGGTGAAGGTTCTAAGCCAT	intronic antisense	NM_138691	TMC1	transmembrane channel-like protein 1	+	75136716	75451267
ASHG19A3A026206	3.42823	1.77746	3.42823	up	164.381	506.894	7.25218	9.02964	noncoding	G36794		misc_RNA	420	chr4	+	156845271	156845691		CAATATCTGTCTTCCTGAAATAACTCCAAACCTGAGTCAACACACATTCTTTTCGGATTG	natural antisense	NM_001334	CTSO	cathepsin O preproprotein	-	156845269	156875048
ASHG19A3A053561	4.08184	2.02922	4.08184	up	116.728	430.087	6.75609	8.78531	noncoding	AK027199		misc_RNA	2118	chr16	-	20866247	20868346		AAATAGCTTTGCATAACCATTGGGTTCTGCTTCTGATTCAGGTGCTGGGCATCATGTCCT	intergenic
ASHG19A3A016150	2.66124	1.4121	2.66124	up	1426.83	3432.63	10.3475	11.7596	noncoding	ENST00000449240	AC073415.2	Ensembl	153	chr2	+	109494763	109494916		TTCAGGCCAAGAAACAAAAGCAAAATTGTCTCATTCCCCAGTGCATTCAGATGAAAACTG	intergenic
ASHG19A3A043574	5.32297	2.41223	5.32297	up	37.9011	190.296	5.12992	7.54215	noncoding	ENST00000420049	RP11-393K12.2	Ensembl	436	chr10	+	7139113	7139637		TCAGTTGTGTCCTATTAGGTGCTCCGCTAACATTCTGCTTTCTCTTCTGAGCCGTCAATA	intergenic
ASHG19A3A014191	4.98922	2.31881	4.98922	up	973.288	4454.16	9.79013	12.1089	noncoding	NR_027467	LIMS3	RefSeq_NR	2525	chr2	-	111203464	111230619	uc002tel.2,	GGAAGTTTTTAGATAGGCTCATAGCCTTGTATTTCGTTTTAGATTGTAAGCTCAATGGTA	exon sense-overlapping	NM_001205288	LIMS3L	LIM and senescent cell antigen-like-containing	-	111222627	111230652
ASHG19A3A014191	4.98922	2.31881	4.98922	up	973.288	4454.16	9.79013	12.1089	noncoding	NR_027467	LIMS3	RefSeq_NR	2525	chr2	-	111203464	111230619	uc002tel.2,	GGAAGTTTTTAGATAGGCTCATAGCCTTGTATTTCGTTTTAGATTGTAAGCTCAATGGTA	exon sense-overlapping	NM_033514	LIMS3	LIM and senescent cell antigen-like-containing	-	111222627	111230652
ASHG19A3L0001954	3.79194	1.92293	3.79194	up	79.0388	277.326	6.198	8.12093	noncoding	AA604748	lincRNA-OXR1-1	lincRNA	262	chr8	+	107055703	107055965		GTGTTTTTCAGAGGCCCTCAGCCATGACTCCATCTTTAATAAATTTCTATAACTCTTTTA	intergenic
ASHG19A3A000369	3.33677	1.73845	3.33677	up	196.422	581.558	7.50413	9.24259	noncoding	ENST00000457658	TTTY15	Ensembl	630	chrY	+	14774264	14802370		acagtccctgtacagggtttctgacctgtgTTCAGTCTTTACAGAAGCTGACGAGAGATT	intergenic
ASHG19A3A021835	2.8465	1.50919	2.8465	up	3743.81	11068.1	11.7793	13.2885	noncoding	NR_003284	PA2G4P4	RefSeq_NR	2751	chr3	-	156527059	156529810	NM_006191,	TGACTCTGGTCTTGGGAGGCGAGGCTTCCCAACCACAGAAGACTACTTTAAATGAAAAAA	intergenic
ASHG19A3L0003403	8.88827	3.1519	8.88827	up	412.897	3304.54	8.55529	11.7072	noncoding	AK128058	lincRNA-ZNF532	lincRNA	6183	chr18	+	56529831	56653197	NM_018181,	TGAAACACATTTCATATGTAAATAAACGTGGGACATTTGGCCCTTGTGCTTCTGTGAGAG	exon sense-overlapping	NM_018181	ZNF532	zinc finger protein 532	+	56530060	56653709
ASHG19A3A035128	3.01634	1.5928	3.01634	up	272.913	712.718	7.96461	9.55741	noncoding	ENST00000453822	AC108510.2	Ensembl	1318	chr7	+	136398617	136399935		AAGTCTAAAGAAAATGTTCTTTATAAGAAACAGGAAGGCACCCCTGAGAGGCTCTATCTC	intergenic
ASHG19A3A030976	2.56338	1.35805	2.56338	up	283.222	636.436	8.02073	9.37878	noncoding	AF143872		misc_RNA	944	chr1	+	151097096	151098017		CCTGTGCTTTCTAGTTGGCTTTAGACATCTTGTTCTAGCAACAATGATGGTAGCAGCTCT	intergenic
ASHG19A3A050375	2.38177	1.25203	2.38177	up	941.26	1944.01	9.7447	10.9967	noncoding	ENST00000427733	KRT18P27	Ensembl	1299	chr13	+	90882637	90883936	ENST00000453838,	AGGATAGTGGATGACAAAGTGGTGTCTGAGACCAACGACACCAAAGTTCTGAGACATTAA	intergenic
ASHG19A3A034638	3.22845	1.69084	3.22845	up	66.2202	199.188	5.93291	7.62375	noncoding	ENST00000434994	AC004006.2	Ensembl	377	chr7	+	82286350	82286727		TAAACCTGCTGTCGGCATTTATAATCCTGGTGCTCATGGGCATCTGGGTATTCTTTGTTG	intergenic
ASHG19A3A043119	2.53082	1.3396	2.53082	up	150.063	346.537	7.12235	8.46195	noncoding	ENST00000420392	RP11-280G19.2	Ensembl	1805	chr10	-	94966613	94969384		CTTGTTCTATAGAGATACCATCAACATAGCCGAGGATGAGGACCTCAGGGTTCACTTTGA	intergenic
ASHG19A3A013252	2.70069	1.43333	2.70069	up	412.568	951.278	8.55336	9.98669	noncoding	ENST00000396295	AC010904.1	Ensembl	318	chr2	-	7464878	7465198	NM_004642,	TCACCGTCCCTAGGCTACACCCAGGGAACTGGGAACAGCCAGGTGCCCCAGAGCAAATAC	intergenic
ASHG19A3A054027	2.2966	1.1995	2.2966	up	4966.88	12145.2	12.217	13.4165	noncoding	ENST00000484096	RP11-568J23.1	Ensembl	664	chr16	-	85849478	85850142		TTGTATATGACATTCACCTGGCTGTCACCTTGTTGGTGTCATTGCCCAAGAAAAACTGGC	intergenic
ASHG19A3A020638	2.01649	1.01185	2.01649	up	1897.48	3484.36	10.7664	11.7782	noncoding	ENST00000432681	AC087431.1	Ensembl	526	chr3	-	659471	659997		ATTTTCATTCCATGCAGCAAAAATGTAGCTCACTTAGTGGGTTTGATGTGGTGGATGCTG	intergenic
ASHG19A3A022521	2.45547	1.296	2.45547	up	70.7508	165.844	6.03019	7.32619	noncoding	ENST00000416072	RP4-657D16.3	Ensembl	573	chr1	+	52259720	52264173		GACCAACGGGCATATTCCAAGATTAAAAGCCGTACATCTCTGTACAGAGGGCAGAAAAAA	natural antisense	NM_001101662	NRD1	nardilysin isoform b	-	52254865	52344609
ASHG19A3A022521	2.45547	1.296	2.45547	up	70.7508	165.844	6.03019	7.32619	noncoding	ENST00000416072	RP4-657D16.3	Ensembl	573	chr1	+	52259720	52264173		GACCAACGGGCATATTCCAAGATTAAAAGCCGTACATCTCTGTACAGAGGGCAGAAAAAA	natural antisense	NM_002525	NRD1	nardilysin isoform a	-	52254865	52344609
ASHG19A3A040809	2.64874	1.40531	2.64874	up	7480.74	23579.8	12.7805	14.1859	noncoding	ENST00000458237	RP11-64I1.2	Ensembl	837	chrX	+	32224018	32224855	NM_199185,NM_002520,ENST00000428821,ENST00000428039,ENST00000423757,ENST00000396690,ENST00000393516,ENST00000343743,	TATGTGAAGAATTGCTTCCAGATGACTGACCAGAGGCTATTCAAGATCTCTGGCAGTGGA	intronic antisense	NM_004011	DMD	dystrophin Dp260-1 isoform	-	31137344	32430371
ASHG19A3A040809	2.64874	1.40531	2.64874	up	7480.74	23579.8	12.7805	14.1859	noncoding	ENST00000458237	RP11-64I1.2	Ensembl	837	chrX	+	32224018	32224855	NM_199185,NM_002520,ENST00000428821,ENST00000428039,ENST00000423757,ENST00000396690,ENST00000393516,ENST00000343743,	TATGTGAAGAATTGCTTCCAGATGACTGACCAGAGGCTATTCAAGATCTCTGGCAGTGGA	intronic antisense	NM_000109	DMD	dystrophin Dp427c isoform	-	31137344	33357726
ASHG19A3A040809	2.64874	1.40531	2.64874	up	7480.74	23579.8	12.7805	14.1859	noncoding	ENST00000458237	RP11-64I1.2	Ensembl	837	chrX	+	32224018	32224855	NM_199185,NM_002520,ENST00000428821,ENST00000428039,ENST00000423757,ENST00000396690,ENST00000393516,ENST00000343743,	TATGTGAAGAATTGCTTCCAGATGACTGACCAGAGGCTATTCAAGATCTCTGGCAGTGGA	intronic antisense	NM_004007	DMD	dystrophin Dp427l isoform	-	31137344	33038317
ASHG19A3A040809	2.64874	1.40531	2.64874	up	7480.74	23579.8	12.7805	14.1859	noncoding	ENST00000458237	RP11-64I1.2	Ensembl	837	chrX	+	32224018	32224855	NM_199185,NM_002520,ENST00000428821,ENST00000428039,ENST00000423757,ENST00000396690,ENST00000393516,ENST00000343743,	TATGTGAAGAATTGCTTCCAGATGACTGACCAGAGGCTATTCAAGATCTCTGGCAGTGGA	intronic antisense	NM_004006	DMD	dystrophin Dp427m isoform	-	31137344	33229673
ASHG19A3A040809	2.64874	1.40531	2.64874	up	7480.74	23579.8	12.7805	14.1859	noncoding	ENST00000458237	RP11-64I1.2	Ensembl	837	chrX	+	32224018	32224855	NM_199185,NM_002520,ENST00000428821,ENST00000428039,ENST00000423757,ENST00000396690,ENST00000393516,ENST00000343743,	TATGTGAAGAATTGCTTCCAGATGACTGACCAGAGGCTATTCAAGATCTCTGGCAGTGGA	intronic antisense	NM_004012	DMD	dystrophin Dp260-2 isoform	-	31137344	32430371
ASHG19A3A040809	2.64874	1.40531	2.64874	up	7480.74	23579.8	12.7805	14.1859	noncoding	ENST00000458237	RP11-64I1.2	Ensembl	837	chrX	+	32224018	32224855	NM_199185,NM_002520,ENST00000428821,ENST00000428039,ENST00000423757,ENST00000396690,ENST00000393516,ENST00000343743,	TATGTGAAGAATTGCTTCCAGATGACTGACCAGAGGCTATTCAAGATCTCTGGCAGTGGA	intronic antisense	NM_004009	DMD	dystrophin Dp427p1 isoform	-	31137344	33146545
ASHG19A3A040809	2.64874	1.40531	2.64874	up	7480.74	23579.8	12.7805	14.1859	noncoding	ENST00000458237	RP11-64I1.2	Ensembl	837	chrX	+	32224018	32224855	NM_199185,NM_002520,ENST00000428821,ENST00000428039,ENST00000423757,ENST00000396690,ENST00000393516,ENST00000343743,	TATGTGAAGAATTGCTTCCAGATGACTGACCAGAGGCTATTCAAGATCTCTGGCAGTGGA	intronic antisense	NM_004010	DMD	dystrophin Dp427p2 isoform	-	31137344	33146544
ASHG19A3A054323	2.41537	1.27224	2.41537	up	85.7173	195.245	6.31528	7.58752	noncoding	BC015170		misc_RNA	1411	chr16	+	16241612	16242634		TAGACTTAGTCCCTCTTTTCCGGTGCCTGCAGCTGGTTTGGTGAGTCCAGTATTAATATA	intergenic
ASHG19A3A027044	3.43148	1.77883	3.43148	up	490.971	1473.16	8.80736	10.5862	noncoding	ENST00000510729	PPIAP11	Ensembl	493	chr5	-	81305420	81305913		TGCATGTGATCTGTGGCAAAGTGAAAGAAGGCATGAATATTGTGGAGGTCATGGAGTGCT	intronic antisense	NM_001131028	ATG10	ubiquitin-like-conjugating enzyme ATG10	+	81267843	81551216
ASHG19A3A027044	3.43148	1.77883	3.43148	up	490.971	1473.16	8.80736	10.5862	noncoding	ENST00000510729	PPIAP11	Ensembl	493	chr5	-	81305420	81305913		TGCATGTGATCTGTGGCAAAGTGAAAGAAGGCATGAATATTGTGGAGGTCATGGAGTGCT	intronic antisense	NM_031482	ATG10	ubiquitin-like-conjugating enzyme ATG10	+	81267843	81551216
ASHG19A3A028049	3.98442	1.99437	3.98442	up	881.726	3163.27	9.65607	11.6504	noncoding	uc003jgz.1	LOC729862	UCSC_knowngene	444	chr5	+	28926976	28927420	NR_027355,NR_027354,NR_027238,NM_002339,NM_001013255,NM_001013254,NM_001013253,ENST00000449530,ENST00000423774,	GAGACATGAGCAACAAAAGCTTCTGGGAGCAGAAGGGAGGCTCCAAGACCTCATCAACAA	intergenic
ASHG19A3A014000	2.00305	1.0022	2.00305	up	1142.3	1988.19	10.0282	11.0304	noncoding	NR_027238	LOC654342	RefSeq_NR	613	chr2	-	91824708	91847975	NR_027356,NR_027355,ENST00000452399,	CCTAGCATTAAGTTGCTTGACTAATACAAGTTTCAATAAATGTCGCTTCATTTCCCATGG	intergenic
ASHG19A3L0000860	2.04485	1.03199	2.04485	up	738.614	1301.13	9.39295	10.4249	noncoding	AK124977	lincRNA-UNKL-2	lincRNA	2638	chr16	-	1413205	1464704	NM_023076,	CTCAAGTGGATTAATTTCTGGAAGCCTCAATCTGTATGTTTGAGTATTTACATGAGAATG	exon sense-overlapping	NM_023076	UNKL	RING finger protein unkempt-like isoform 3	-	1413205	1429684
ASHG19A3L0000860	2.04485	1.03199	2.04485	up	738.614	1301.13	9.39295	10.4249	noncoding	AK124977	lincRNA-UNKL-2	lincRNA	2638	chr16	-	1413205	1464704	NM_023076,	CTCAAGTGGATTAATTTCTGGAAGCCTCAATCTGTATGTTTGAGTATTTACATGAGAATG	exon sense-overlapping	NM_001037125	UNKL	RING finger protein unkempt-like isoform 2	-	1448305	1464705
ASHG19A3L0000860	2.04485	1.03199	2.04485	up	738.614	1301.13	9.39295	10.4249	noncoding	AK124977	lincRNA-UNKL-2	lincRNA	2638	chr16	-	1413205	1464704	NM_023076,	CTCAAGTGGATTAATTTCTGGAAGCCTCAATCTGTATGTTTGAGTATTTACATGAGAATG	natural antisense	NM_032520	GNPTG	N-acetylglucosamine-1-phosphotransferase subunit	+	1401899	1413352
ASHG19A3L0000860	2.04485	1.03199	2.04485	up	738.614	1301.13	9.39295	10.4249	noncoding	AK124977	lincRNA-UNKL-2	lincRNA	2638	chr16	-	1413205	1464704	NM_023076,	CTCAAGTGGATTAATTTCTGGAAGCCTCAATCTGTATGTTTGAGTATTTACATGAGAATG	exon sense-overlapping	NM_001193389	UNKL	RING finger protein unkempt-like isoform 4	-	1413205	1429684
ASHG19A3L0000860	2.04485	1.03199	2.04485	up	738.614	1301.13	9.39295	10.4249	noncoding	AK124977	lincRNA-UNKL-2	lincRNA	2638	chr16	-	1413205	1464704	NM_023076,	CTCAAGTGGATTAATTTCTGGAAGCCTCAATCTGTATGTTTGAGTATTTACATGAGAATG	exon sense-overlapping	NM_001193388	UNKL	RING finger protein unkempt-like isoform 1	-	1413205	1464705
ASHG19A3A036207	2.03448	1.02466	2.03448	up	41.334	84.6071	5.26006	6.28472	noncoding	AK097840		misc_RNA	2028	chr8	-	144152426	144155415		TTTGAGACCTCTTCTTGGGTGCTTTAAGCTGACATGTCCACCATCAAGTCTTCTCACTGT	intergenic
ASHG19A3A047367	3.13549	1.64869	3.13549	up	199.282	556.712	7.52566	9.17435	noncoding	BX649153		misc_RNA	4757	chr12	-	14915440	14920865		TAGACATATTTTCAATTGCTCCATGGACCTTAAGAAAACTTGGTTGGTGTGCAGTTTGGT	intergenic
ASHG19A3A055127	3.53742	1.8227	3.53742	up	161.278	511.92	7.22207	9.04477	noncoding	uc002dnh.1	AK093382	UCSC_knowngene	1799	chr16	+	25078358	25080275		AAGAGCAAGGGAAGAGGTGAGGAACTTCAGtcccagctgctctggagtttgaggcaggag	intergenic
ASHG19A3A028559	2.45433	1.29533	2.45433	up	966.321	2067.81	9.78089	11.0762	noncoding	ENST00000513884	CTD-2341D24.1	Ensembl	920	chr5	+	97912044	97912964	NM_022802,NM_001329,NM_001083914,	TCAGTAATAGACCAGCAAGCAATTCATCCTGAGCTCAATGGTGCCACATACAGATATCCG	intergenic
ASHG19A3A027784	3.48979	1.80314	3.48979	up	81.0632	261.741	6.23368	8.03682	noncoding	CR604135		RNAdb	333	chr5	-	179157348	179157681		GGAAAGTCTGCTATGTAGCTAAGGTCACTGTGACCACAGAACAACAGATGAAAAGGAAAA	natural antisense	NM_001024649	CANX	calnexin precursor	+	179125929	179158639
ASHG19A3A027784	3.48979	1.80314	3.48979	up	81.0632	261.741	6.23368	8.03682	noncoding	CR604135		RNAdb	333	chr5	-	179157348	179157681		GGAAAGTCTGCTATGTAGCTAAGGTCACTGTGACCACAGAACAACAGATGAAAAGGAAAA	natural antisense	NM_001746	CANX	calnexin precursor	+	179125929	179158639
ASHG19A3A030683	3.30308	1.72381	3.30308	up	114.3	344.319	6.72735	8.45116	noncoding	ENST00000406807	RP1-281H8.3	Ensembl	720	chr6	-	149812705	149813425		AACCAAGAGACTAAAAAGGGCCAACCAAACTTGAATGTACAAATAGAGTACCTTCTTCAA	intergenic
ASHG19A3A042519	2.67806	1.42119	2.67806	up	354.442	822.899	8.34442	9.7656	noncoding	BC041955		misc_RNA	1068	chr10	-	21781588	21782604		ACCATGCGTGCACTTTGCCAAGGATCTTTGGTAACCAATAAAACGATCATGTTCACTCTG	intergenic
ASHG19A3A043355	8.59064	3.10277	8.59064	up	2411.02	24088.1	11.1075	14.2102	noncoding	ENST00000394996	RP11-498J9.1	Ensembl	622	chr10	-	120692185	120692807	ENST00000509421,ENST00000398295,ENST00000397561,	GGTCTCTATGGAATAAAGGATGATGTCTTCCTTAGTGTTCCTTGCATTTTGGGACAGAAT	intergenic
ASHG19A3A036119	2.00593	1.00427	2.00593	up	111.09	208.294	6.68632	7.69059	noncoding	U82321		RNAdb	2137	chr8	-	125624737	125626872		TATAAATGTGACAAGTCCTGGTGTTAGCTCCTGGCCTCCAATTGAGCAAGGTTTCAGTAG	intron sense-overlapping	NM_014751	MTSS1	metastasis suppressor protein 1	-	125563027	125740730
ASHG19A3A018940	2.37831	1.24994	2.37831	up	1655.43	3559.55	10.558	11.808	noncoding	ENST00000450190	MRPL51P2	Ensembl	376	chr21	-	44535443	44535819		AGAGTGTATGACAACATCAGGATCCTGGGAAACTTTGAAAAGCACCCCAAAAGCTGATCA	intergenic
ASHG19A3A049234	2.60832	1.38312	2.60832	up	3260.29	8185.43	11.5649	12.948	noncoding	ENST00000465341	CTD-2140B24.1	Ensembl	471	chr12	+	133702064	133702535		ATATGTTTGACTGGCTCCTGGTTCCCATGCTCTGGATGTTGCCAACAAAACTGAATAATC	intergenic
ASHG19A3A015686	2.016	1.01149	2.016	up	3913.3	7568.36	11.8466	12.8581	noncoding	ENST00000325668	RP11-416L21.1	Ensembl	435	chr2	+	60938618	60939055		AAGAAATATGCCATCTACATTGAACGGGTGCAGTGGGAAAAGGCTAACAGCATAGCTGTC	intergenic
ASHG19A3A007193	2.76368	1.46659	2.76368	up	272.121	653.738	7.95951	9.4261	noncoding	NR_015449	RNF216L	RefSeq_NR	2270	chr7	+	5013615	5037798	NM_207116,NM_207111,	AGGACACTATGCAATCACCCGAAAGGCCTTTTCTGATGCCATTAAAAAATGGCAGGAGCT	intergenic
ASHG19A3A037686	2.12971	1.09066	2.12971	up	54.9299	115.273	5.66605	6.75671	noncoding	ENST00000457976	RP11-305L7.3	Ensembl	506	chr9	-	93881419	93925369		TCAGCCTCTTTGGGGTTTGGGTTCTGACCAAGTAAATCGGGAATGTTGTTAACATATCAA	intergenic
ASHG19A3A024810	2.81129	1.49123	2.81129	up	288.027	703.564	8.04765	9.53888	noncoding	ENST00000509609	RP13-539F13.2	Ensembl	448	chr4	-	145841868	145842316		ATGGCCTGTGCCTTGCATTTTCTGATGGAGCCACAGCCAGAGTCTGAGCCAACTCTTGAT	intergenic
ASHG19A3A047415	2.5609	1.35665	2.5609	up	5388.52	15075.1	12.3202	13.6768	noncoding	ENST00000480211	RP11-318G8.1	Ensembl	153	chr12	-	25562226	25562379		TGGTAATACAATCAGGTACAACTCCAAAAGGAGACAATGGAGAAGAACCAAGCTGGGGCT	intergenic
ASHG19A3A053964	2.1001	1.07046	2.1001	up	478.707	861.769	8.76653	9.83699	noncoding	ENST00000478088	RP11-150D5.1	Ensembl	569	chr16	-	76268952	76269521		TGTCCCTTTCCCAGATGATCCAGAAGAGTGAAGCTTCCTGTCCGGGAAAACAAAACGGCC	intergenic
ASHG19A3A047758	3.42978	1.77812	3.42978	up	869.765	2663.73	9.63805	11.4162	noncoding	ENST00000473404	RP11-415I12.1	Ensembl	252	chr12	-	64154140	64154392		CAGCAAACAGGAGGAAAAGCAAGGCTTACAGAAGAATGTTCCTTCAGATGGAAGCAACAC	intergenic
ASHG19A3A032552	2.71435	1.44061	2.71435	up	30.4211	82.9327	4.80949	6.2501	noncoding	ENST00000416636	CLK2P	Ensembl	1476	chr7	-	23624680	23626156	NR_002711,	AAAGTGCTGGAGAAAATCAACGAGAAAGACCCTGGCAAGAACCTCTGTGTCCAGATGTTT	intergenic
ASHG19A3A038073	3.19613	1.67632	3.19613	up	189.369	541.299	7.45518	9.1315	noncoding	AK001094		NRED	1654	chr9	-	130606139	130728738		TCGATTTAAATTGTTTCCTTATTAGACTCTCGCTCTCTGGCCTGGGCTGGGTTTCATCAG	intron sense-overlapping	NM_000476	AK1	adenylate kinase isoenzyme 1	-	130628758	130640022
ASHG19A3A038073	3.19613	1.67632	3.19613	up	189.369	541.299	7.45518	9.1315	noncoding	AK001094		NRED	1654	chr9	-	130606139	130728738		TCGATTTAAATTGTTTCCTTATTAGACTCTCGCTCTCTGGCCTGGGCTGGGTTTCATCAG	intron sense-overlapping	NM_001035254	FAM102A	early estrogen-induced gene 1 protein isoform a	-	130702860	130742812
ASHG19A3A038073	3.19613	1.67632	3.19613	up	189.369	541.299	7.45518	9.1315	noncoding	AK001094		NRED	1654	chr9	-	130606139	130728738		TCGATTTAAATTGTTTCCTTATTAGACTCTCGCTCTCTGGCCTGGGCTGGGTTTCATCAG	intron sense-overlapping	NM_003863	DPM2	dolichol phosphate-mannose biosynthesis	-	130697373	130700763
ASHG19A3A038073	3.19613	1.67632	3.19613	up	189.369	541.299	7.45518	9.1315	noncoding	AK001094		NRED	1654	chr9	-	130606139	130728738		TCGATTTAAATTGTTTCCTTATTAGACTCTCGCTCTCTGGCCTGGGCTGGGTTTCATCAG	intron sense-overlapping	NM_175039	ST6GALNAC4	"alpha-N-acetyl-neuraminyl-2,3-beta-galactosyl-1,"	-	130670164	130679305
ASHG19A3A038073	3.19613	1.67632	3.19613	up	189.369	541.299	7.45518	9.1315	noncoding	AK001094		NRED	1654	chr9	-	130606139	130728738		TCGATTTAAATTGTTTCCTTATTAGACTCTCGCTCTCTGGCCTGGGCTGGGTTTCATCAG	intron sense-overlapping	NM_013443	ST6GALNAC6	alpha-N-acetylgalactosaminide	-	130647600	130661871
ASHG19A3A038073	3.19613	1.67632	3.19613	up	189.369	541.299	7.45518	9.1315	noncoding	AK001094		NRED	1654	chr9	-	130606139	130728738		TCGATTTAAATTGTTTCCTTATTAGACTCTCGCTCTCTGGCCTGGGCTGGGTTTCATCAG	intron sense-overlapping	NM_203305	FAM102A	early estrogen-induced gene 1 protein isoform b	-	130702860	130712993
ASHG19A3A038073	3.19613	1.67632	3.19613	up	189.369	541.299	7.45518	9.1315	noncoding	AK001094		NRED	1654	chr9	-	130606139	130728738		TCGATTTAAATTGTTTCCTTATTAGACTCTCGCTCTCTGGCCTGGGCTGGGTTTCATCAG	intron sense-overlapping	NM_173492	PIP5KL1	phosphatidylinositol-4-phosphate 5-kinase-like	-	130683807	130689770
ASHG19A3A038073	3.19613	1.67632	3.19613	up	189.369	541.299	7.45518	9.1315	noncoding	AK001094		NRED	1654	chr9	-	130606139	130728738		TCGATTTAAATTGTTTCCTTATTAGACTCTCGCTCTCTGGCCTGGGCTGGGTTTCATCAG	intron sense-overlapping	NM_001114753	ENG	endoglin isoform 1 precursor	-	130577290	130617047
ASHG19A3A038073	3.19613	1.67632	3.19613	up	189.369	541.299	7.45518	9.1315	noncoding	AK001094		NRED	1654	chr9	-	130606139	130728738		TCGATTTAAATTGTTTCCTTATTAGACTCTCGCTCTCTGGCCTGGGCTGGGTTTCATCAG	intron sense-overlapping	NM_000118	ENG	endoglin isoform 2 precursor	-	130577290	130617047
ASHG19A3A038073	3.19613	1.67632	3.19613	up	189.369	541.299	7.45518	9.1315	noncoding	AK001094		NRED	1654	chr9	-	130606139	130728738		TCGATTTAAATTGTTTCCTTATTAGACTCTCGCTCTCTGGCCTGGGCTGGGTTTCATCAG	intron sense-overlapping	NM_001135219	PIP5KL1	phosphatidylinositol-4-phosphate 5-kinase-like	-	130683807	130693076
ASHG19A3A038073	3.19613	1.67632	3.19613	up	189.369	541.299	7.45518	9.1315	noncoding	AK001094		NRED	1654	chr9	-	130606139	130728738		TCGATTTAAATTGTTTCCTTATTAGACTCTCGCTCTCTGGCCTGGGCTGGGTTTCATCAG	intron sense-overlapping	NM_175040	ST6GALNAC4	"alpha-N-acetyl-neuraminyl-2,3-beta-galactosyl-1,"	-	130670164	130679305
ASHG19A3A033572	3.14081	1.65114	3.14081	up	707.297	1926.99	9.33225	10.9834	noncoding	ENST00000419509	AC083875.2	Ensembl	405	chr7	-	132999762	133000167		CCAGTTTGGTTTCATTGTACTGACTCAGCTCACATCATGGACCATGAAGAAGCAACACAA	intronic antisense	NM_021807	EXOC4	exocyst complex component 4 isoform a	+	132937822	133750513
ASHG19A3A033572	3.14081	1.65114	3.14081	up	707.297	1926.99	9.33225	10.9834	noncoding	ENST00000419509	AC083875.2	Ensembl	405	chr7	-	132999762	133000167		CCAGTTTGGTTTCATTGTACTGACTCAGCTCACATCATGGACCATGAAGAAGCAACACAA	intronic antisense	NM_001037126	EXOC4	exocyst complex component 4 isoform b	+	132937822	133168946
ASHG19A3A036926	6.66706	2.73705	6.66706	up	102.414	605.032	6.56647	9.30352	noncoding	ENST00000512617	PVT1	Ensembl	1836	chr8	+	129000922	129004320		AAGAAAGGCCCAGGCATTTGCATCTATGTGTGCAGTTCTACTTGTCCTAAAGGCACTTCT	intergenic
ASHG19A3A055208	2.94464	1.55809	2.94464	up	134.296	359.279	6.96008	8.51817	noncoding	uc003kzj.2	BC032795	UCSC_knowngene	1045	chr5	+	133842304	133844920	ENST00000515627,	GCTAATGGTGGAATTTCTGGCATGTGGCAGggccaagtgcagtggctcacacctataatc	intergenic
ASHG19A3A025279	3.8904	1.95992	3.8904	up	80.6824	288.617	6.22734	8.18726	noncoding	ENST00000513014	RP11-751L19.1	Ensembl	541	chr4	+	9734993	9743985	NM_058187,ENST00000514073,	ATTGATCCAGCCATTGCTAATCTAAAACCTTCTTTGAAGCAGAAAGATGGTGAATATGGT	intergenic
ASHG19A3A013488	2.17003	1.11772	2.17003	up	172.583	342.173	7.32356	8.44128	noncoding	ENST00000427200	AC009414.1	Ensembl	443	chr2	-	36526530	36526973		AATGATCAGAAAAACAAGGAAGCCAAAGAGAAAGGTACCTGGGTTTGACTGAAGCGCCAG	intergenic
ASHG19A3A025052	2.00471	1.00339	2.00471	up	265.874	474.231	7.92359	8.92699	noncoding	NR_024008	C4orf38	RefSeq_NR	2179	chr4	-	184018173	184020352		GCACCAAACCAAACCATTCTTATTTAAACCTTGCTTCCTAGCTTATTTATTTCCCAAACA	bidirectional	NM_024949	WWC2	protein WWC2	+	184020462	184241929
ASHG19A3A047483	7.25903	2.85978	7.25903	up	467.208	3021.85	8.73077	11.5905	noncoding	ENST00000411674	RP11-115A15.3	Ensembl	924	chr1	-	80916766	80917690		CACGGTGGCTATGGCAGTTCCAGTAGCAGCAATAACTATGGAAGTGGCAGAAGATTTTAA	intergenic
ASHG19A3A021550	7.0903	2.82585	7.0903	up	161.083	992.815	7.22021	10.0461	noncoding	ENST00000466990	POU5F1P6	Ensembl	911	chr3	-	128393572	128395848		GGAGAACTTGTTCCTGCAGTGCCTGAAACCCACACTACAGCAGATTAGCCACATTGCCCA	intergenic
ASHG19A3A055302	3.47318	1.79626	3.47318	up	1062.91	3350.44	9.92766	11.7239	noncoding	uc010oxw.1	AF161426	UCSC_knowngene	477	chr1	+	144175658	144212182	uc001ekp.3,NM_001039703,	AAGACCAAGACCCATCATGCCCCAGGCTCAGCAGGGAGCTGCTGGAGGTAGTAGAGCCTG	intergenic
ASHG19A3L0001612	2.08655	1.06112	2.08655	up	58.1168	119.199	5.74851	6.80963	noncoding	chr5:170992545-171005495+	lincRNA-FBXW11-1	lincRNA	12951	chr5	+	170992545	171005495		TATTTTCCAACATCCTCTCCAACTCTCACATTCTATGATGATGCAGAGAGGCAGCCTGGA	intergenic
CUST_479_PI426073487	2.1053	1.07403	2.1053	up	1027.93	1877.54	9.87124	10.9453	noncoding	uc.481+	uc.481	UCR	204	chrX	+	123235474	123235678	NM_006603,NM_001042751,NM_001042750,NM_001042749,	CAGGTTAAAGATACTTCTAACAGGTTACAGTACATTTCCTCTGTATGTAAATTAGATGGG	exon sense-overlapping	NM_001042750	STAG2	cohesin subunit SA-2 isoform a	+	123095555	123236505
CUST_479_PI426073487	2.1053	1.07403	2.1053	up	1027.93	1877.54	9.87124	10.9453	noncoding	uc.481+	uc.481	UCR	204	chrX	+	123235474	123235678	NM_006603,NM_001042751,NM_001042750,NM_001042749,	CAGGTTAAAGATACTTCTAACAGGTTACAGTACATTTCCTCTGTATGTAAATTAGATGGG	exon sense-overlapping	NM_001042749	STAG2	cohesin subunit SA-2 isoform a	+	123094474	123236505
CUST_479_PI426073487	2.1053	1.07403	2.1053	up	1027.93	1877.54	9.87124	10.9453	noncoding	uc.481+	uc.481	UCR	204	chrX	+	123235474	123235678	NM_006603,NM_001042751,NM_001042750,NM_001042749,	CAGGTTAAAGATACTTCTAACAGGTTACAGTACATTTCCTCTGTATGTAAATTAGATGGG	exon sense-overlapping	NM_001042751	STAG2	cohesin subunit SA-2 isoform b	+	123095555	123236505
CUST_479_PI426073487	2.1053	1.07403	2.1053	up	1027.93	1877.54	9.87124	10.9453	noncoding	uc.481+	uc.481	UCR	204	chrX	+	123235474	123235678	NM_006603,NM_001042751,NM_001042750,NM_001042749,	CAGGTTAAAGATACTTCTAACAGGTTACAGTACATTTCCTCTGTATGTAAATTAGATGGG	exon sense-overlapping	NM_006603	STAG2	cohesin subunit SA-2 isoform b	+	123095555	123236505
ASHG19A3A023522	2.92269	1.5473	2.92269	up	2470.53	6701.09	11.1424	12.6897	noncoding	BC041913		misc_RNA	2227	chr3	+	170112404	170114616		GTGCTCTGAGCTTATACCTCAATTGTATTTTGTGCTGTTTTCCATTTTCATGCCTTGTAA	intergenic
ASHG19A3A037464	3.18104	1.6695	3.18104	up	500.249	1386.44	8.83541	10.5049	noncoding	ENST00000446396	RP11-111F5.1	Ensembl	307	chr9	-	46669134	46669441	ENST00000512403,ENST00000414918,ENST00000412428,	ATTTTAAGACTTGGTGGCTGAGAAACAACTCATCCTGGATGGCTGTGGGGCCAAATATAG	intergenic
ASHG19A3A044717	12.4241	3.63508	12.4241	up	233.199	2567.66	7.73555	11.3706	noncoding	uc009yby.1	AK123483	UCSC_knowngene	1965	chr11	-	565659	568420		CATTCTCAGAGCACAAAGACCCCATGATCTAGGGCAAACTTGTCCAACTGTTGGCCCATG	intergenic
ASHG19A3A013999	2.52076	1.33386	2.52076	up	135.739	314.073	6.9742	8.30806	noncoding	uc002sts.3	LOC654342	UCSC_knowngene	1165	chr2	-	91805191	91847975		ATGTTGCTTTTGTCATACATTAGTGGTAGTTCATCGCACGGCAATAGAAAACCAAAATAC	intergenic
ASHG19A3A049839	2.51458	1.33032	2.51458	up	52.7568	129.964	5.60862	6.93894	noncoding	ENST00000411449	RP11-120J20.1	Ensembl	460	chr13	-	111415020	111415480		GAGAACTGATATGTGTATTGAGCACATGAAGCACTCTAAGAGCCAAGAGAGCTTCCTGAC	intergenic
ASHG19A3A018663	3.84685	1.94368	3.84685	up	280.939	928.514	8.00818	9.95186	noncoding	ENST00000456825	RPL37P3	Ensembl	293	chr21	-	19266509	19266802		CGTGAAGGAACAACAGCTAAATCCAGAAAGACAACTGTTGCAGCATCCAGTTCATCTTAA	intergenic
ASHG19A3A053736	2.24764	1.16841	2.24764	up	2295.6	4832.37	11.0443	12.2127	noncoding	ENST00000498379	CTD-2600H12.1	Ensembl	384	chr16	-	48368381	48368765		ATTTGAGGGCAAACAGCTGAAGGATGGCCACACACTCTTAGACTACAACATCCAGAAAGA	intronic antisense	NM_031490	LONP2	"lon protease homolog 2, peroxisomal"	+	48278210	48387407
ASHG19A3A010699	2.97065	1.57078	2.97065	up	59.2448	167.536	5.7734	7.34418	noncoding	ENST00000417675	AC090771.2	Ensembl	378	chr18	+	57865031	57865409		ATAGAGATACTCCAGGCAGCCTACAAGCTCCACACATGGCAATTATGGTGTCTGATGAAA	intergenic
ASHG19A3A048430	2.33144	1.22122	2.33144	up	1557.25	3292.49	10.4805	11.7018	noncoding	AK095203		misc_RNA	1776	chr12	+	20835230	20837006		TGAAGGTAAAAGCTGTGCAAAAGGCATGAGACTCAGGCCTACTCTTTGTTTAAATGATGG	intergenic
ASHG19A3A039209	2.01893	1.01359	2.01893	up	469.171	815.335	8.73847	9.75206	noncoding	ENST00000432816	RP11-163B6.2	Ensembl	1264	chr9	+	125599835	125601099	ENST00000505463,	ACTTCAATCTTGGTGATGCCCTGGACAGCAGGAATTCCATGCAAAACATCCAAAAGACCA	intergenic
ASHG19A3A049909	2.18161	1.12539	2.18161	up	2129.02	4308.46	10.9373	12.0627	noncoding	CR620979		misc_RNA	1065	chr13	+	20662159	20663224		AATATTGACTGTAGGATAATCTCCTTGTTCCCCTCAAAATAGTCATGAAAGTGTACATGA	exon sense-overlapping	NM_003453	ZMYM2	zinc finger MYM-type protein 2	+	20532809	20665968
ASHG19A3A049909	2.18161	1.12539	2.18161	up	2129.02	4308.46	10.9373	12.0627	noncoding	CR620979		misc_RNA	1065	chr13	+	20662159	20663224		AATATTGACTGTAGGATAATCTCCTTGTTCCCCTCAAAATAGTCATGAAAGTGTACATGA	exon sense-overlapping	NM_001190964	ZMYM2	zinc finger MYM-type protein 2	+	20532847	20665968
ASHG19A3A049909	2.18161	1.12539	2.18161	up	2129.02	4308.46	10.9373	12.0627	noncoding	CR620979		misc_RNA	1065	chr13	+	20662159	20663224		AATATTGACTGTAGGATAATCTCCTTGTTCCCCTCAAAATAGTCATGAAAGTGTACATGA	exon sense-overlapping	NM_197968	ZMYM2	zinc finger MYM-type protein 2	+	20532809	20665968
ASHG19A3A049909	2.18161	1.12539	2.18161	up	2129.02	4308.46	10.9373	12.0627	noncoding	CR620979		misc_RNA	1065	chr13	+	20662159	20663224		AATATTGACTGTAGGATAATCTCCTTGTTCCCCTCAAAATAGTCATGAAAGTGTACATGA	exon sense-overlapping	NM_001190965	ZMYM2	zinc finger MYM-type protein 2	+	20532973	20665968
ASHG19A3A032047	4.10101	2.03598	4.10101	up	794.48	2903.99	9.50123	11.5372	noncoding	ENST00000405151	RP1-179E13.1	Ensembl	806	chr6	+	127004180	127004986		GGATGTCATCAGCATTGACAAGGGACACAATTTCTGTCTGATCTATGACACCAAGGGTTG	intergenic
ASHG19A3A043369	2.44434	1.28944	2.44434	up	3403.54	8039.32	11.6351	12.9246	noncoding	ENST00000425391	RP11-781P14.3	Ensembl	180	chr10	-	121829491	121829671		GTCCACCTCACAGCTCTCCTGGGATACAAAGCTGGCATGACCCACATCCTGTGCAAAGTC	intergenic
ASHG19A3A051492	4.02031	2.00731	4.02031	up	632.134	2232.9	9.1723	11.1796	noncoding	HIT000285654		H-invDB	706	chr14	+	60864453	60865158	NM_005105,	TTCACCTCAACCTCAACAGGCGAACAGGATATCTGAAGGGGTATACTCTAGTTGAATATG	intergenic
ASHG19A3A055133	2.00841	1.00605	2.00841	up	119.608	223.447	6.79165	7.79771	noncoding	uc002fke.2	FLJ00104	UCSC_knowngene	6196	chr16	-	87731753	87739290		CAGTCCATCCAGTGTGCAGAGGCTGGTACCGTTTTGTGTCATGCAGTTACTGGAATGTAC	natural antisense	NM_020655	JPH3	junctophilin-3	+	87636498	87731761
ASHG19A3A041223	2.74415	1.45636	2.74415	up	45.1838	121.841	5.38534	6.8417	noncoding	ENST00000446395	RP1-198G23.2	Ensembl	342	chrX	+	77809906	77810248		GCTAACTGTGCCAACTCCTACTACTTTATGACCTTCTTTAATTTCTTCCAATAATCAGAA	intergenic
ASHG19A3A031242	2.59672	1.37669	2.59672	up	857.382	1937.43	9.61492	10.9916	noncoding	ENST00000437516	HLA-N	Ensembl	135	chr6	+	30319192	30319327		ACATTGATCTGGCAGCAGGATGGGGAGGACTATACCTAGGACATGGAGCTTGCAGAGACC	intergenic
ASHG19A3A035915	7.38746	2.88508	7.38746	up	1266.09	8892.21	10.175	13.0601	noncoding	ENST00000222956	HNRNPA1P4	Ensembl	600	chr8	-	83203858	83204617	NR_003277,NR_002944,NM_031157,NM_002136,NM_001011725,NM_001011724,ENST00000512366,ENST00000505767,ENST00000444945,ENST00000437295,ENST00000436090,ENST00000432375,ENST00000430583,ENST00000429216,ENST00000424481,ENST00000421426,ENST00000406883,ENST00000406078,ENST00000404243,ENST00000396326,ENST00000391992,ENST00000379950,	AATCAGTCTTCAAATTTTGGACCCATGAAGGGAGGAAATTTTGGAGGCAGAAGCTCTGGC	intergenic
ASHG19A3A038721	3.60325	1.8493	3.60325	up	306.956	951.359	8.13788	9.98718	noncoding	uc004afe.1	CR626459	UCSC_knowngene	1471	chr9	+	69065509	69087326		ATATTGTTAGGCGAGATGGAAAGAAAGTATCAAGGAGTGAGCTGAAGCCACTGCCCTTGA	intergenic
ASHG19A3A007080	2.21811	1.14933	2.21811	up	2250.53	4635.65	11.0172	12.1665	noncoding	NR_000029	RPL23AP7	RefSeq_NR	1231	chr2	-	114368815	114384715	uc010euw.2,NR_029406,NR_026982,NR_026981,NR_024529,NR_024528,ENST00000487264,ENST00000416673,	GATCACCTAAACTGAGTCCAGCTGGCTAACTCTAAATATATGTGTATCTTTTCAGCATAA	bidirectional	NM_007082	RABL2A	rab-like protein 2A	+	114384816	114400975
ASHG19A3A007080	2.21811	1.14933	2.21811	up	2250.53	4635.65	11.0172	12.1665	noncoding	NR_000029	RPL23AP7	RefSeq_NR	1231	chr2	-	114368815	114384715	uc010euw.2,NR_029406,NR_026982,NR_026981,NR_024529,NR_024528,ENST00000487264,ENST00000416673,	GATCACCTAAACTGAGTCCAGCTGGCTAACTCTAAATATATGTGTATCTTTTCAGCATAA	bidirectional	NM_013412	RABL2A	rab-like protein 2A	+	114384816	114400975
ASHG19A3A016444	2.84553	1.5087	2.84553	up	26.7692	76.9383	4.62297	6.13166	noncoding	ENST00000451774	AC074093.1	Ensembl	2098	chr2	+	145425592	145831662	uc002twc.2,	GATTGTTGAGATCTGGCGACTTGTTTAAATTTCATCAGCCTCACTTCTATGAACTCTCAG	intergenic
ASHG19A3A000252	2.06765	1.04799	2.06765	up	67.3972	135.842	5.96044	7.00843	noncoding	ENST00000439074	RP11-528A4.2	Ensembl	702	chr3	-	193560348	193561798		ACACGCAGAGCACAGACCGTTTTTGATGGTGCTGCAGGGAACAAGGCCCCACCAGTGTGT	intergenic
ASHG19A3A040237	3.50317	1.80866	3.50317	up	119.722	379.266	6.79369	8.60235	noncoding	NR_003238	H2BFXP	RefSeq_NR	829	chrX	-	103315218	103317502		TGCACAAGGAGACCAAGAAAAACTCCCACAAAATCAGCTGCAAGTAAATCCCTCTGGATG	intergenic
ASHG19A3A015506	9.23542	3.20718	9.23542	up	400.053	3347.49	8.51374	11.7209	noncoding	ENST00000342073	AC093393.2	Ensembl	924	chr2	+	33861568	33862492		TCAAAGCAAGAGATGGCTAGTGCTTCACCAGCCAAAGAGGTCAAAGTCGTTTTGGAAACT	intergenic
ASHG19A3A054416	2.67556	1.41984	2.67556	up	42.094	111.507	5.28249	6.70233	noncoding	G43283		misc_RNA	150	chr1	-	161135347	161135497		CAAAAAGTGATATTGCAGAGGGTCTGGGGGCTGTACATGGGCAGGGGCTTGGTGAGCTTT	natural antisense	NM_001014443	USP21	ubiquitin carboxyl-terminal hydrolase 21	+	161129253	161135516
ASHG19A3A054416	2.67556	1.41984	2.67556	up	42.094	111.507	5.28249	6.70233	noncoding	G43283		misc_RNA	150	chr1	-	161135347	161135497		CAAAAAGTGATATTGCAGAGGGTCTGGGGGCTGTACATGGGCAGGGGCTTGGTGAGCTTT	bidirectional	NM_001122764	PPOX	protoporphyrinogen oxidase	+	161136180	161141010
ASHG19A3A054416	2.67556	1.41984	2.67556	up	42.094	111.507	5.28249	6.70233	noncoding	G43283		misc_RNA	150	chr1	-	161135347	161135497		CAAAAAGTGATATTGCAGAGGGTCTGGGGGCTGTACATGGGCAGGGGCTTGGTGAGCTTT	bidirectional	NM_000309	PPOX	protoporphyrinogen oxidase	+	161136180	161141010
ASHG19A3A054416	2.67556	1.41984	2.67556	up	42.094	111.507	5.28249	6.70233	noncoding	G43283		misc_RNA	150	chr1	-	161135347	161135497		CAAAAAGTGATATTGCAGAGGGTCTGGGGGCTGTACATGGGCAGGGGCTTGGTGAGCTTT	natural antisense	NM_012475	USP21	ubiquitin carboxyl-terminal hydrolase 21	+	161129253	161135516
ASHG19A3A017781	3.22803	1.69065	3.22803	up	684.311	1920.28	9.28845	10.9791	noncoding	ENST00000414761	SNRPFP1	Ensembl	252	chr20	-	48346127	48346379	NM_003095,	ATCTGGGTGAAGTTTTAATAAGGTGTAATAATGTCCTTTATATCAGAGGTGTGGAAGAAG	intergenic
ASHG19A3A034213	2.0151	1.01085	2.0151	up	14327.3	41086.5	13.815	14.8258	noncoding	ENST00000396038	AC078843.2	Ensembl	501	chr7	+	37415121	37415626		GCAACTGAATTCCAGTTTAGAGGAGGATTTGGTTGTGAACATGGTCAGCCACCTCAGTAA	intronic antisense	NM_014800	ELMO1	engulfment and cell motility protein 1 isoform	-	36892510	37488555
ASHG19A3A034213	2.0151	1.01085	2.0151	up	14327.3	41086.5	13.815	14.8258	noncoding	ENST00000396038	AC078843.2	Ensembl	501	chr7	+	37415121	37415626		GCAACTGAATTCCAGTTTAGAGGAGGATTTGGTTGTGAACATGGTCAGCCACCTCAGTAA	intronic antisense	NM_001206480	ELMO1	engulfment and cell motility protein 1 isoform	-	36892510	37488895
ASHG19A3A000180	4.3322	2.1151	4.3322	up	3428.47	16203.1	11.6437	13.7588	noncoding	ENST00000426153	ANXA2P2	Ensembl	585	chr9	+	33624271	33625291		ACCAGGAGCTGCAGGAAATTAACAGAATCATGGTCTCCCGCAGTGAAGTGGACATGTTGA	intergenic
ASHG19A3A049319	2.36303	1.24064	2.36303	up	63.2618	144.812	5.86611	7.10675	noncoding	AL390167		RNAdb	967	chr13	-	25498811	25500622	uc010tdg.1,ENST00000434100,	TATGATGGCATAAAGAATTGTATCAGAACGGGTAATCTGGCATTAAAACCCCTGTGCCAC	intergenic
ASHG19A3A028187	4.91091	2.29599	4.91091	up	261.02	1100.49	7.89922	10.1952	noncoding	ENST00000397001	RP11-269M20.1	Ensembl	513	chr5	+	49928921	49929435		AAGAACACATGAATATTGTGGAAGCCATGGAGCACTTTGGGTACAGGAATGGCAAGACCA	intergenic
ASHG19A3A035363	3.79039	1.92235	3.79039	up	1043.13	3594.78	9.89621	11.8186	noncoding	ENST00000477993	FABP5L3	Ensembl	1027	chr7	+	152133979	152140272	NM_001444,	CATTTTACATGCAGCTATTTCAAAGTGTGTTGGATTCATTAGGATCATCCCTTTGGTTAA	bidirectional	NM_170606	MLL3	histone-lysine N-methyltransferase MLL3	-	151832009	152133090
ASHG19A3A042644	2.11076	1.07776	2.11076	up	68.8496	141.308	5.99182	7.06958	noncoding	ENST00000423458	RP11-453N3.1	Ensembl	397	chr10	-	39055225	39055622	uc010mmw.2,ENST00000441919,ENST00000436016,ENST00000426062,ENST00000421091,	AAGATGTTCTGTGATGTGGGCAAGAGGCTGCTCTGTTTTCTGTGTTCTAACTCTCAGGAA	intergenic
ASHG19A3A022472	7.43176	2.8937	7.43176	up	1495.66	11233.3	10.4198	13.3135	noncoding	ENST00000424115	RP11-241K18.1	Ensembl	961	chr3	+	39376469	39377430	ENST00000424481,ENST00000404243,	AATACTTTACCAAACCATGAAACCAAGGTGGCTATGGCAGTTCCAGTAGCAGCAGTAGCT	intergenic
ASHG19A3A031764	2.9144	1.5432	2.9144	up	95.7917	258.531	6.47356	8.01676	noncoding	ENST00000452402	RP11-250B2.3	Ensembl	682	chr6	+	81153060	81175644		AAGCTTTCACTGGGAGATTATGAAGGGTAGATGCTTTGTGTCTCCATTGCCTCCTGTGAT	intergenic
ASHG19A3A012595	2.89106	1.5316	2.89106	up	218.428	557.968	7.64716	9.17876	noncoding	NR_029389	LOC100134317	RefSeq_NR	611	chr19	+	36802244	36803568	NR_029390,	CCATTTTGTTCAACATGGGCGTTTTCTTTGTGCATTGATTTGCATTTTTAAAGGTATTCC	intergenic
ASHG19A3A028469	2.63059	1.39538	2.63059	up	4377.41	12166.8	12.023	13.4184	noncoding	ENST00000469685	CTD-2331D11.1	Ensembl	875	chr5	+	84760251	84761128		AACTGCCAAAATATGGTGTGAAGTTGGCCTGACAAATTATGCTGCAGTGTATTGGACAGG	intergenic
ASHG19A3A034592	2.48604	1.31385	2.48604	up	142.905	324.877	7.04777	8.36162	noncoding	uc003ufs.1	LOC554248	UCSC_knowngene	1496	chr7	+	76178676	76256128	uc003squ.2,NR_029411,ENST00000484974,ENST00000450661,	AGGTCTATCAGCCACAGTCTCTGCAAGTTTCCAAGAGCAGCAGAAAATGAACACATTGCA	natural antisense	NM_012230	POMZP3	POM121 and ZP3 fusion protein isoform 1	-	76239302	76256620
ASHG19A3A034592	2.48604	1.31385	2.48604	up	142.905	324.877	7.04777	8.36162	noncoding	uc003ufs.1	LOC554248	UCSC_knowngene	1496	chr7	+	76178676	76256128	uc003squ.2,NR_029411,ENST00000484974,ENST00000450661,	AGGTCTATCAGCCACAGTCTCTGCAAGTTTCCAAGAGCAGCAGAAAATGAACACATTGCA	natural antisense	NM_152992	POMZP3	POM121 and ZP3 fusion protein isoform 2	-	76239302	76256620
ASHG19A3A013363	2.43039	1.28119	2.43039	up	43.2124	104.241	5.32113	6.60232	noncoding	ENST00000423706	AC012506.1	Ensembl	525	chr2	-	23553534	23554915		ATCCTGGATCACTCTGAGAGGTCACTGGAAAAGAACGAGAACAGCTTTCCCCATTTCTTA	intergenic
ASHG19A3A017876	3.18003	1.66904	3.18003	up	1015.32	2868.8	9.85228	11.5213	noncoding	ENST00000448371	RP11-157P1.4	Ensembl	307	chr20	-	60880487	60881452		CAGCAGGTGGCAAATTGTGGCCGCCATCTGTGTTTGCAAATAAAGTTTAACTGGAGTTTG	intronic antisense	NM_007002	ADRM1	proteasomal ubiquitin receptor ADRM1 precursor	+	60878026	60883918
ASHG19A3A017876	3.18003	1.66904	3.18003	up	1015.32	2868.8	9.85228	11.5213	noncoding	ENST00000448371	RP11-157P1.4	Ensembl	307	chr20	-	60880487	60881452		CAGCAGGTGGCAAATTGTGGCCGCCATCTGTGTTTGCAAATAAAGTTTAACTGGAGTTTG	intronic antisense	NM_175573	ADRM1	proteasomal ubiquitin receptor ADRM1 precursor	+	60878026	60883918
ASHG19A3A012941	2.0787	1.05568	2.0787	up	67.7267	137.031	5.96706	7.02274	noncoding	NR_033235	LOC100129083	RefSeq_NR	729	chr19	+	51919159	51920679		TTGAACCAGTAGCCATAAGCTGGGGTAGACCCTGTCCAGTCCTGTCGGGGGTAGGAGAAA	natural antisense	NM_001171158	SIGLEC10	sialic acid-binding Ig-like lectin 10 isoform 4	-	51913274	51921057
ASHG19A3A012941	2.0787	1.05568	2.0787	up	67.7267	137.031	5.96706	7.02274	noncoding	NR_033235	LOC100129083	RefSeq_NR	729	chr19	+	51919159	51920679		TTGAACCAGTAGCCATAAGCTGGGGTAGACCCTGTCCAGTCCTGTCGGGGGTAGGAGAAA	natural antisense	NM_001171157	SIGLEC10	sialic acid-binding Ig-like lectin 10 isoform 3	-	51913274	51921057
ASHG19A3A012941	2.0787	1.05568	2.0787	up	67.7267	137.031	5.96706	7.02274	noncoding	NR_033235	LOC100129083	RefSeq_NR	729	chr19	+	51919159	51920679		TTGAACCAGTAGCCATAAGCTGGGGTAGACCCTGTCCAGTCCTGTCGGGGGTAGGAGAAA	natural antisense	NM_001171160	SIGLEC10	sialic acid-binding Ig-like lectin 10 isoform 6	-	51913274	51921057
ASHG19A3A012941	2.0787	1.05568	2.0787	up	67.7267	137.031	5.96706	7.02274	noncoding	NR_033235	LOC100129083	RefSeq_NR	729	chr19	+	51919159	51920679		TTGAACCAGTAGCCATAAGCTGGGGTAGACCCTGTCCAGTCCTGTCGGGGGTAGGAGAAA	natural antisense	NM_001171161	SIGLEC10	sialic acid-binding Ig-like lectin 10 isoform 7	-	51913274	51921057
ASHG19A3A012941	2.0787	1.05568	2.0787	up	67.7267	137.031	5.96706	7.02274	noncoding	NR_033235	LOC100129083	RefSeq_NR	729	chr19	+	51919159	51920679		TTGAACCAGTAGCCATAAGCTGGGGTAGACCCTGTCCAGTCCTGTCGGGGGTAGGAGAAA	natural antisense	NM_001171159	SIGLEC10	sialic acid-binding Ig-like lectin 10 isoform 5	-	51913274	51921057
ASHG19A3A012941	2.0787	1.05568	2.0787	up	67.7267	137.031	5.96706	7.02274	noncoding	NR_033235	LOC100129083	RefSeq_NR	729	chr19	+	51919159	51920679		TTGAACCAGTAGCCATAAGCTGGGGTAGACCCTGTCCAGTCCTGTCGGGGGTAGGAGAAA	natural antisense	NM_033130	SIGLEC10	sialic acid-binding Ig-like lectin 10 isoform 1	-	51913274	51921057
ASHG19A3A012941	2.0787	1.05568	2.0787	up	67.7267	137.031	5.96706	7.02274	noncoding	NR_033235	LOC100129083	RefSeq_NR	729	chr19	+	51919159	51920679		TTGAACCAGTAGCCATAAGCTGGGGTAGACCCTGTCCAGTCCTGTCGGGGGTAGGAGAAA	natural antisense	NM_001171156	SIGLEC10	sialic acid-binding Ig-like lectin 10 isoform 2	-	51913274	51921057
ASHG19A3A048763	2.05787	1.04115	2.05787	up	959.38	1728.07	9.76952	10.8107	noncoding	NR_027032	LOC100130776	RefSeq_NR	1567	chr12	+	58120022	58122138		CTCCCGGCTCCCCACTTGTTACCTGCTTTATAAATATTTCTTAAACTACCAAAGGATTTT	natural antisense	NM_001122772	AGAP2	"arf-GAP with GTPase, ANK repeat and PH"	-	58118993	58132029
ASHG19A3A048763	2.05787	1.04115	2.05787	up	959.38	1728.07	9.76952	10.8107	noncoding	NR_027032	LOC100130776	RefSeq_NR	1567	chr12	+	58120022	58122138		CTCCCGGCTCCCCACTTGTTACCTGCTTTATAAATATTTCTTAAACTACCAAAGGATTTT	natural antisense	NM_014770	AGAP2	"arf-GAP with GTPase, ANK repeat and PH"	-	58118993	58135940
ASHG19A3A020560	3.33426	1.73737	3.33426	up	1106.88	3335.06	9.97897	11.7163	noncoding	ENST00000396089	CTA-268H5.9	Ensembl	486	chr22	+	45671479	45671966		AAGAACCAGATTGCCGTTTATGAACTCCTTTTTAAGCAGGGAGTCATGGTGGCTAAGGAG	intergenic
ASHG19A3A038715	2.19351	1.13324	2.19351	up	98.264	201.153	6.50716	7.6404	noncoding	uc004aew.1	AK308561	UCSC_knowngene	1596	chr9	+	68409997	68413434		GGAGGCATAAGACATTTTTTGTCTCTGCCTTCTGTTCTCTGTTTCTTGCTCCTTTTGTCT	intergenic
ASHG19A3A036175	2.10976	1.07708	2.10976	up	637.336	1159.09	9.18541	10.2625	noncoding	BC043181		misc_RNA	2248	chr8	-	141515913	141518142		AGAAGTAGAGAGAGAAGCCAAGCAGGAAATCTTCATACTGGAAAAGAAGTGCTCACCATT	intergenic
ASHG19A3A052923	2.39484	1.25993	2.39484	up	3648.56	8476.37	11.7422	13.0021	noncoding	NR_002188	GBAP1	RefSeq_NR	2036	chr1	-	155183616	155197325	NM_001171812,NM_001171811,NM_001005741,NM_000157,	TGATTCCTATGGCACCAGCCAGGAAAAATGGCAGCTCTTAAAGGAGAAAATGTTTGAGCC	natural antisense	NM_198883	MTX1	metaxin-1 isoform 2	+	155178489	155183624
ASHG19A3A020040	2.09057	1.0639	2.09057	up	130.984	253.498	6.92502	7.98892	noncoding	AK056836		NRED	2559	chr22	+	17593917	17596477	uc002zlz.1,	CTCCAGGGAGAAATGAAGACATGGTCCTACGTTGTTCTGTAATTATTTTCTATGTAAATT	exon sense-overlapping	NM_014339	IL17RA	interleukin-17 receptor A precursor	+	17565850	17596584
ASHG19A3A043836	3.75379	1.90835	3.75379	up	142.16	480.125	7.03916	8.9475	noncoding	ENST00000427864	RP11-96F8.1	Ensembl	105	chr10	+	39076134	39076239	NM_005467,ENST00000427470,	GAGAATGTTACAAATATTGTGCCACCATATAAAGCTTTCTCAGCCCAAGGCATGCCAGAG	intergenic
ASHG19A3A023990	12.6542	3.66155	12.6542	up	136.776	1546.08	6.98594	10.6475	noncoding	AK023947		NRED	1917	chr4	-	16743670	16745590		GCTACACATTAAACCAGCTGGAGTTGGTTGTAGGTAAAATAACTCAAAACCATGTTGTAT	intron sense-overlapping	NM_001290	LDB2	LIM domain-binding protein 2 isoform a	-	16503164	16900424
ASHG19A3A023990	12.6542	3.66155	12.6542	up	136.776	1546.08	6.98594	10.6475	noncoding	AK023947		NRED	1917	chr4	-	16743670	16745590		GCTACACATTAAACCAGCTGGAGTTGGTTGTAGGTAAAATAACTCAAAACCATGTTGTAT	intron sense-overlapping	NM_001130834	LDB2	LIM domain-binding protein 2 isoform b	-	16503164	16900424
ASHG19A3A020151	2.32538	1.21746	2.32538	up	110.491	238.437	6.67868	7.89614	noncoding	ENST00000449424	KB-1323B2.6	Ensembl	2593	chr22	+	21821679	21825558	uc002zsa.1,	GGTAGCGCCGTCAATTGCTTATTGTGAAATGCCCCTTCATAAACACCCATACACATTTTG	intergenic
ASHG19A3A025941	2.64639	1.40403	2.64639	up	77.2994	193.147	6.1636	7.56763	noncoding	ENST00000515767	RP11-447B21.1	Ensembl	1272	chr4	+	116841862	116843134		CAGATAGTGAATGGTAAAGTGGTGTCTGAGACCAACGACATCAAAGTTCTGAGACATTAA	intergenic
ASHG19A3A013500	2.2571	1.17447	2.2571	up	3806.19	8304.58	11.8044	12.9789	noncoding	ENST00000415722	AC007390.4	Ensembl	356	chr2	-	37421524	37421880	ENST00000433233,ENST00000431088,ENST00000422587,ENST00000413849,	CCAAATAAGCTCTGTACTTTGATTACCTATGTACCTGTTACCACTTTCAAAAATCTACAG	intergenic
ASHG19A3A044723	2.05449	1.03878	2.05449	up	617.833	1090.19	9.14399	10.1828	noncoding	ENST00000430163	RP5-882O7.5	Ensembl	390	chr1	-	45457505	45457895	NM_015969,	AGTTTGGAAACCACCCAGCTAAGCAAAAATCTGGAAGAACTCAATATCTCTTCAGCACAG	intergenic
ASHG19A3A037143	2.2716	1.18371	2.2716	up	485.571	943.083	8.79006	9.97376	noncoding	ENST00000456717	RP11-132E11.3	Ensembl	146	chr9	-	17096298	17096444		ATATGTGCCACCAGTGTTTCTGTCAGTATGCAAAGGACATAGCTTTTATTAAGCTGGATG	intergenic
ASHG19A3A028441	2.11051	1.07759	2.11051	up	8031.63	19915.7	12.8986	13.9762	noncoding	ENST00000460281	CTC-512J14.1	Ensembl	156	chr5	+	79611489	79611645	NM_001000,ENST00000495111,ENST00000446011,ENST00000424573,ENST00000422215,	AATAAAATCACGTACAACTCCAAAAGGAGACACTGGAGAAGAACCAAGCTGGGTCTATAA	intergenic
ASHG19A3A051955	3.60737	1.85095	3.60737	up	442.999	1387.05	8.65486	10.5058	noncoding	AK093628		misc_RNA	2050	chr15	-	32809905	32811954		ACATGGTTTGGGGATTGGGGAAAGGGAAGTCATGCTGTTAATAAAATAGTGAGGCATGTT	intergenic
ASHG19A3A050615	2.33702	1.22467	2.33702	up	5508.61	13748.2	12.3497	13.5743	noncoding	ENST00000438477	RP5-920G3.2	Ensembl	1003	chr1	-	120038461	120039464		GACAATGAATTTGACTACAACAACAGGGTGGTGAACCTCATTGCCCACATGGCCTTCAAA	intergenic
ASHG19A3A053267	2.39537	1.26025	2.39537	up	3540.05	8196.41	11.6921	12.9524	noncoding	BC040578		NRED	3284	chr15	+	93438055	93441314		CCAGATAATAGTTTTTATGCCTGGAATTTTTTGCAGTTTGATTTGTATGCGTATGACCTC	intergenic
ASHG19A3A032015	3.05085	1.60921	3.05085	up	62.793	181.397	5.85554	7.46475	noncoding	ENST00000407291	RP1-276J11.2	Ensembl	389	chr6	+	121702617	121703006		CATGGACCACAAAGAATCAGGATGAAAACACACAGGAGGGAAGATCCTGGGAATTTTTTC	intergenic
ASHG19A3A040555	2.9091	1.54057	2.9091	up	331.114	838.606	8.25102	9.79159	noncoding	ENST00000434763	RP11-66N11.5	Ensembl	852	chrX	-	152869951	152870803		AGGAGCTGGACAGTACTGGTCTCAGCAGATTGAGGACAGCACCAGAGGGGTTACCATGCA	intergenic
ASHG19A3A031226	2.51396	1.32996	2.51396	up	519.707	1125.29	8.89226	10.2222	noncoding	ENST00000439514	HLA-80	Ensembl	771	chr6	+	29924372	29926347		TTGTTCTTGGTGCTGTTTTCACCAGAGCTGTGGTCACTGCTGTGATGTGAAGAATAAGAG	intergenic
ASHG19A3A038586	2.50965	1.32749	2.50965	up	57.3498	139.842	5.7266	7.05408	noncoding	ENST00000445359	RP13-198D9.3	Ensembl	727	chr9	+	38643038	38643765		ACACTGAATGAAGAGTCTTATAAAGACAGCACTCCCACCATGCAGTGACTTCGGGACAAT	intergenic
ASHG19A3A046256	2.02979	1.02133	2.02979	up	1214.14	2180.93	10.1181	11.1394	noncoding	NR_015451	LOC283267	RefSeq_NR	3322	chr11	+	33097695	33100999		ATGTTCATCATCTCTTCTATACTAGAGCTGCAGTCTTACATTTGCTTACTTCCTGACATC	intergenic
ASHG19A3A020465	2.66046	1.41167	2.66046	up	1175.79	2778.44	10.0668	11.4785	noncoding	ENST00000441207	RP4-742C19.11	Ensembl	421	chr22	+	39551529	39551950		CTTCAGCTTGCAAATCATACTGGGTACATCAAAGTTGACTGGCAACGAGTGGAGAAAGAT	intergenic
[truncated: 901 more rows]

## Sheet: 103T vs 103N_down
# Fold Change cut-off: 2.0 # Condition pairs: 103T vs 103N # Column A: ProbeName, it represents probe name. # Column B: Fold change, positive value indicates up-regulation and negative value indicates down-regulation. # Column C: Log Fold change, log2 value of absolute fold change. Positive value indicates up-regulation and negative value indicates down-regulation. # Column D: Absolute Fold chang…
[truncated: 3,108 more rows]

[truncated: 10 more sheets: 104T vs 104N_up, 104T vs 104N_down, 109T vs 109N_up, 109T vs 109N_down, 110T vs 110N_up, 110T vs 110N_down, 119T vs 119N_up, 119T vs 119N_down, 120T vs 120N_up, 120T vs 120N_down]
