# Supplementary material for: LncRNAs Expression Signatures of Renal Clear Cell Carcinoma Revealed by Microarray
Source: PLoS One. 2012 Aug 6;7(8):e42377. doi: 10.1371/journal.pone.0042377 (PMC3412851; doi:10.1371/journal.pone.0042377)
Supplement: Table S10 — LncRNAs nearby Coding gene data table. (XLS) [file pone.0042377.s010.xls]

## Sheet: 103T vs 103N
# Condition pairs: 103T vs 103N # Fold Change cut-off: 2.0 This table contains the differentially expressed lincRNA and nearby coding gene pairs (distance < 300 kb). # Column A: seqname, the sequence identifier. # Column B: GeneSymbol, the symbol of the LncRNA. # Column C: Fold change - LncRNAs, the ratio of normalized intensities between two samples, positive value indicates up-regulation, and n…
seqname	GeneSymbol	Fold change - LncRNAs	Log Fold change - LncRNAs	Absolute Fold change - LncRNAs	Regulation - LncRNAs	source	RNAlength	Chrom	Strand	txStart	txEnd	GenomeRelationship	NearbyGene	NearbyGeneSymbol	NearbyProteinName	Fold change - mRNAs	Log Fold change - mRNAs	Absolute Fold change - mRNAs	Regulation - mRNAs	NearbyGeneChrom	NearbyGeneStrand	NearbyGenetxStart	NearbyGenetxEnd
NR_027345	NCRNA00173	3.74055	1.90325	3.74055	up	RefSeq_NR	1597	chr12	+	116971226	116973326	downstream	NM_001109903	RNFT2	RING finger and transmembrane domain-containing	2.47465	1.30723	2.47465	up	chr12	+	117176095	117291436
chr11:102425615-102440915+	lincRNA-MMP20	-3.12704	-1.6448	3.12704	down	lincRNA	15301	chr11	+	102425615	102440915	upstream	NM_001166	BIRC2	baculoviral IAP repeat-containing protein 2	3.04896	1.60832	3.04896	up	chr11	+	102217965	102249401
ENST00000452496	ASS1P12	-3.65157	-1.86852	3.65157	down	Ensembl	1227	chr9	+	32945993	32947220	downstream	NM_001539	DNAJA1	dnaJ homolog subfamily A member 1	2.02569	1.01841	2.02569	up	chr9	+	33025208	33039062
AK226132	lincRNA-ZFP106	2.45484	1.29563	2.45484	up	lincRNA	5684	chr15	-	42707320	42783303	downstream	NM_173089	CAPN3	calpain-3 isoform e	-2.44099	-1.28747	2.44099	down	chr15	+	42696976	42704515
NR_002578	GAS5	2.60067	1.37889	2.60067	up	RefSeq_NR	651	chr1	-	173833039	173837125	upstream	NM_001122770	ZBTB37	zinc finger and BTB domain-containing protein 37	-2.82356	-1.49752	2.82356	down	chr1	+	173837492	173855774
BX112397	lincRNA-FAM183A-2	-3.45901	-1.79036	3.45901	down	lincRNA	753	chr1	+	43464813	43465491	upstream	NM_148960	CLDN19	claudin-19 isoform a	-2.23799	-1.1622	2.23799	down	chr1	-	43198763	43205925
chr7:143147778-143169303-	lincRNA-TAS2R60	-3.70461	-1.88932	3.70461	down	lincRNA	21526	chr7	-	143147778	143169303	downstream	NM_176882	TAS2R40	taste receptor type 2 member 40	-3.69928	-1.88724	3.69928	down	chr7	+	142919171	142920143
NR_024279	FLJ37453	2.07852	1.05556	2.07852	up	RefSeq_NR	2732	chr1	-	16160709	16174642	upstream	NM_001042704	CLCNKA	chloride channel protein ClC-Ka isoform 2	-98.7369	-6.62552	98.7369	down	chr1	+	16348485	16360545
uc010wkl.1	DQ589083	2.10986	1.07715	2.10986	up	UCSC_knowngene	1661	chr17	-	45126240	45127901	upstream	NM_000212	ITGB3	integrin beta-3 precursor	-2.20527	-1.14095	2.20527	down	chr17	+	45331207	45390077
AW268874	lincRNA-PIBF1	-4.41029	-2.14087	4.41029	down	lincRNA	462	chr13	-	73596400	73596862	downstream	NM_006346	PIBF1	progesterone-induced-blocking factor 1	2.0932	1.06571	2.0932	up	chr13	+	73356229	73590591
ENST00000420287	RP11-505F3.4	4.67573	2.22519	4.67573	up	Ensembl	408	chr13	-	73674715	73675123	downstream	NM_006346	PIBF1	progesterone-induced-blocking factor 1	2.0932	1.06571	2.0932	up	chr13	+	73356229	73590591
ENST00000457669	AP000696.2	-3.83673	-1.93988	3.83673	down	Ensembl	1133	chr21	-	38004978	38009331	downstream	NM_012130	CLDN14	claudin-14	2.05798	1.04123	2.05798	up	chr21	-	37832919	37838725
BI459631	lincRNA-GUCA2B	-2.00726	-1.00523	2.00726	down	lincRNA	732	chr1	+	42501816	42502537	downstream	NM_033553	GUCA2A	guanylin precursor	-5.39317	-2.43113	5.39317	down	chr1	-	42628361	42630395
AX747492	lincRNA-HFE2	3.99432	1.99795	3.99432	up	lincRNA	4510	chr1	+	145209144	146424095	overlap	NM_153713	LIX1L	LIX1-like protein	3.99225	1.9972	3.99225	up	chr1	+	145477084	145499091
uc001wkc.1	AX746599	-6.88726	-2.78393	6.88726	down	UCSC_knowngene	2524	chr14	+	23982557	24013485	upstream	NM_001042635	NGDN	neuroguidin isoform 1	3.88012	1.9561	3.88012	up	chr14	+	23938897	23947402
uc002ioy.1	AK097622	-2.1861	-1.12836	2.1861	down	UCSC_knowngene	1754	chr17	-	47535222	47539111	downstream	NM_002634	PHB	prohibitin	-2.00684	-1.00492	2.00684	down	chr17	-	47481419	47492242
AA309472	lincRNA-SHANK2	-5.71487	-2.51472	5.71487	down	lincRNA	320	chr11	-	71083066	71083386	upstream	NM_001012710	KRTAP5-10	keratin-associated protein 5-10	-2.14666	-1.1021	2.14666	down	chr11	+	71276608	71277666
NR_027058	C17orf86	5.18852	2.37532	5.18852	up	RefSeq_NR	2183	chr17	+	75084724	75091067	downstream	NM_001039573	SEC14L1	SEC14-like protein 1 isoform b	3.06634	1.61652	3.06634	up	chr17	+	75137004	75213181
NR_003013	SCARNA16	8.19356	3.03449	8.19356	up	RefSeq_NR	187	chr17	+	75085388	75085574	downstream	NM_001039573	SEC14L1	SEC14-like protein 1 isoform b	3.06634	1.61652	3.06634	up	chr17	+	75137004	75213181
ENST00000392478	AC015815.2	-2.15825	-1.10986	2.15825	down	Ensembl	123	chr17	-	75085985	75087063	upstream	NM_001039573	SEC14L1	SEC14-like protein 1 isoform b	3.06634	1.61652	3.06634	up	chr17	+	75137004	75213181
ENST00000366365	C17orf86	5.0831	2.34571	5.0831	up	Ensembl	1028	chr17	+	75084949	75086180	downstream	NM_001039573	SEC14L1	SEC14-like protein 1 isoform b	3.06634	1.61652	3.06634	up	chr17	+	75137004	75213181
uc003eoc.1	BC043572	-2.1782	-1.12314	2.1782	down	UCSC_knowngene	1768	chr3	-	131044145	131100319	downstream	NM_014065	ASTE1	protein asteroid homolog 1	2.30772	1.20647	2.30772	up	chr3	-	130732720	130745646
BC034527		-5.36606	-2.42386	5.36606	down	misc_RNA	1077	chr1	-	211713915	211714910	upstream	NM_021194	SLC30A1	zinc transporter 1	-2.60502	-1.3813	2.60502	down	chr1	-	211748380	211752099
AK124321	lincRNA-RNF32-3	-3.06759	-1.61711	3.06759	down	lincRNA	2538	chr7	+	155755325	155759037	upstream	NM_000193	SHH	sonic hedgehog protein preproprotein	-3.10586	-1.63499	3.10586	down	chr7	-	155595557	155604967
AK296158	lincRNA-TMEM30B-1	4.32899	2.11403	4.32899	up	lincRNA	1756	chr14	+	61654286	62016579	downstream	NM_003082	SNAPC1	snRNA-activating protein complex subunit 1	3.13843	1.65004	3.13843	up	chr14	+	62229074	62263146
ENST00000508827	AL355916.1	-7.18517	-2.84502	7.18517	down	Ensembl	5103	chr14	-	62023037	62037371	upstream	NM_003082	SNAPC1	snRNA-activating protein complex subunit 1	3.13843	1.65004	3.13843	up	chr14	+	62229074	62263146
AA745165	lincRNA-C18orf45	-2.01357	-1.00976	2.01357	down	lincRNA	231	chr18	+	20861791	20862022	downstream	NM_013326	C18orf8	colon cancer-associated protein Mic1	2.06629	1.04704	2.06629	up	chr18	+	21083461	21111744
ENST00000470614	RP11-69M1.1	3.16235	1.661	3.16235	up	Ensembl	315	chr12	-	8147365	8147680	downstream	NM_001145465	NANOGNB	NANOG neighbor homeobox	-4.19871	-2.06995	4.19871	down	chr12	+	7917811	7926717
AL832122		2.06247	1.04437	2.06247	up	misc_RNA	5572	chr1	-	23607802	23613245	downstream	NM_001142546	LUZP1	leucine zipper protein 1	-2.49111	-1.31679	2.49111	down	chr1	-	23410515	23495351
AW879648	lincRNA-SLC37A3-2	-2.57937	-1.36702	2.57937	down	lincRNA	366	chr7	+	139954781	139955675	upstream	NM_030984	TBXAS1	thromboxane-A synthase isoform 2	5.63812	2.49521	5.63812	up	chr7	+	139528951	139720125
chr16:87577874-87589624-	lincRNA-ZCCHC14	-2.95105	-1.56123	2.95105	down	lincRNA	11751	chr16	-	87577874	87589624	downstream	NM_022818	MAP1LC3B	microtubule-associated proteins 1A/1B light	2.1089	1.07649	2.1089	up	chr16	+	87425800	87438380
uc003kzj.2	BC032795	2.94464	1.55809	2.94464	up	UCSC_knowngene	1045	chr5	+	133842304	133844920	upstream	NM_003337	UBE2B	ubiquitin-conjugating enzyme E2 B	2.95485	1.56308	2.95485	up	chr5	+	133706869	133727799
uc003nih.2	BC033330	-2.4446	-1.2896	2.4446	down	UCSC_knowngene	2883	chr6	+	26569551	26574925	upstream	NM_001732	BTN1A1	butyrophilin subfamily 1 member A1 precursor	-4.17091	-2.06036	4.17091	down	chr6	+	26501494	26510652
DB522844	lincRNA-LOC100131199	-2.52599	-1.33685	2.52599	down	lincRNA	463	chr7	-	141212709	141228978	upstream	NM_003143	SSBP1	single-stranded DNA-binding protein,	2.07017	1.04975	2.07017	up	chr7	+	141438175	141450257
ENST00000400856	RP11-106M7.2	-3.71412	-1.89302	3.71412	down	Ensembl	499	chr10	+	116569133	116570929	downstream	NM_020940	FAM160B1	hypothetical protein LOC57700 isoform a	3.64167	1.8646	3.64167	up	chr10	+	116581502	116624474
chr1:77167210-77175109-	lincRNA-ST6GALNAC3	-3.03788	-1.60306	3.03788	down	lincRNA	7900	chr1	-	77167210	77175109	downstream	NM_001160011	ST6GALNAC3	alpha-N-acetylgalactosaminide	2.8703	1.5212	2.8703	up	chr1	+	76540388	77042892
uc003fah.1	BC015836	-2.61523	-1.38694	2.61523	down	UCSC_knowngene	777	chr3	-	155008020	155011471	downstream	NM_007287	MME	neprilysin	-2.20641	-1.1417	2.20641	down	chr3	+	154797704	154901518
AK091382		-5.34634	-2.41855	5.34634	down	misc_RNA	2368	chr4	+	8495637	8498002	upstream	NM_018986	SH3TC1	SH3 domain and tetratricopeptide	2.47195	1.30565	2.47195	up	chr4	+	8201059	8242830
AK226132	lincRNA-ZFP106	2.45484	1.29563	2.45484	up	lincRNA	5684	chr15	-	42707320	42783303	downstream	NM_173087	CAPN3	calpain-3 isoform c	-2.75224	-1.46061	2.75224	down	chr15	+	42651697	42704515
NR_023938	C14orf132	2.47738	1.30881	2.47738	up	RefSeq_NR	7504	chr14	+	96505661	96560133	downstream	NM_000623	BDKRB2	B2 bradykinin receptor	-2.13469	-1.09403	2.13469	down	chr14	+	96671134	96710666
chr10:74002486-74020610+	lincRNA-DDIT4-1	-2.13655	-1.09528	2.13655	down	lincRNA	18125	chr10	+	74002486	74020610	downstream	NM_019058	DDIT4	DNA damage-inducible transcript 4 protein	8.70048	3.12109	8.70048	up	chr10	+	74033676	74035797
AA457263	lincRNA-GPR61	-3.42921	-1.77788	3.42921	down	lincRNA	451	chr1	+	110072368	110072818	upstream	NM_001040709	SYPL2	synaptophysin-like protein 2	-2.9817	-1.57614	2.9817	down	chr1	+	110009099	110024764
ENST00000421191	XXbac-BPG248L24.10	2.13572	1.09472	2.13572	up	Ensembl	306	chr6	-	31275591	31276326	upstream	NM_001166538	LST1	leukocyte-specific transcript 1 protein isoform	2.0284	1.02034	2.0284	up	chr6	+	31554976	31556686
uc003nih.2	BC033330	-2.4446	-1.2896	2.4446	down	UCSC_knowngene	2883	chr6	+	26569551	26574925	upstream	NM_007047	BTN3A2	butyrophilin subfamily 3 member A2 isoform a	3.87459	1.95404	3.87459	up	chr6	+	26365397	26378548
NR_001590	IFITM4P	3.27365	1.7109	3.27365	up	RefSeq_NR	342	chr6	-	29718584	29718925	downstream	NM_001098479	HLA-F	HLA class I histocompatibility antigen, alpha	2.64789	1.40484	2.64789	up	chr6	+	29691116	29695073
ENST00000441380	IFITM4P	3.25848	1.7042	3.25848	up	Ensembl	420	chr6	-	29718505	29718925	downstream	NM_001098479	HLA-F	HLA class I histocompatibility antigen, alpha	2.64789	1.40484	2.64789	up	chr6	+	29691116	29695073
AA594021	lincRNA-GNA13	-3.89442	-1.96141	3.89442	down	lincRNA	359	chr17	-	63099542	63099901	upstream	NM_001081955	RGS9	regulator of G-protein signaling 9 isoform 2	2.01036	1.00745	2.01036	up	chr17	+	63133455	63223821
NR_001590	IFITM4P	3.27365	1.7109	3.27365	up	RefSeq_NR	342	chr6	-	29718584	29718925	downstream	NM_018950	HLA-F	HLA class I histocompatibility antigen, alpha	2.01627	1.01169	2.01627	up	chr6	+	29691116	29694303
ENST00000441380	IFITM4P	3.25848	1.7042	3.25848	up	Ensembl	420	chr6	-	29718505	29718925	downstream	NM_018950	HLA-F	HLA class I histocompatibility antigen, alpha	2.01627	1.01169	2.01627	up	chr6	+	29691116	29694303
NR_024279	FLJ37453	2.07852	1.05556	2.07852	up	RefSeq_NR	2732	chr1	-	16160709	16174642	upstream	NM_014424	HSPB7	heat shock protein beta-7	-3.042	-1.60502	3.042	down	chr1	-	16340522	16345285
chr10:74002486-74020610+	lincRNA-DDIT4-1	-2.13655	-1.09528	2.13655	down	lincRNA	18125	chr10	+	74002486	74020610	downstream	NM_017626	DNAJB12	dnaJ homolog subfamily B member 12	2.2683	1.18161	2.2683	up	chr10	-	74092587	74114907
NR_027105	LOC285419	5.44424	2.44473	5.44424	up	RefSeq_NR	566	chr4	+	124573939	124851518	upstream	NM_199327	SPRY1	protein sprouty homolog 1	15.9128	3.99211	15.9128	up	chr4	+	124317955	124324907
AK095484		-2.00463	-1.00333	2.00463	down	misc_RNA	2135	chr11	+	43665787	43667921	downstream	NM_001145033	C11orf96	protein Ag2 homolog	2.13562	1.09466	2.13562	up	chr11	+	43964105	43965433
AF083120		-2.52564	-1.33665	2.52564	down	misc_RNA	158	chr11	+	62321164	62321291	downstream	NM_002696	POLR2G	DNA-directed RNA polymerase II subunit RPB7	2.85267	1.51231	2.85267	up	chr11	+	62529010	62534187
NR_015422	LOC149134	-2.11732	-1.08224	2.11732	down	RefSeq_NR	1123	chr1	+	246952918	246954788	downstream	NM_020394	ZNF695	zinc finger protein 695 isoform 1	-4.78546	-2.25866	4.78546	down	chr1	-	247148624	247171395
CR609715		2.52262	1.33493	2.52262	up	misc_RNA	1695	chr1	-	247350699	247352392	downstream	NM_020394	ZNF695	zinc finger protein 695 isoform 1	-4.78546	-2.25866	4.78546	down	chr1	-	247148624	247171395
chr8:30192504-30200352+	lincRNA-RBPMS-2	2.19271	1.13272	2.19271	up	lincRNA	7849	chr8	+	30192504	30200352	upstream	NM_006571	DCTN6	dynactin subunit 6	2.59014	1.37303	2.59014	up	chr8	+	30013812	30041155
ENST00000509266	AC026979.1	-6.00659	-2.58655	6.00659	down	Ensembl	1967	chr8	-	30044816	30047775	downstream	NM_006571	DCTN6	dynactin subunit 6	2.59014	1.37303	2.59014	up	chr8	+	30013812	30041155
uc003nih.2	BC033330	-2.4446	-1.2896	2.4446	down	UCSC_knowngene	2883	chr6	+	26569551	26574925	upstream	NM_001145009	BTN3A1	butyrophilin subfamily 3 member A1 isoform d	3.33867	1.73927	3.33867	up	chr6	+	26402464	26415444
chr7:73684091-73687309-	lincRNA-RFC2	-3.21452	-1.6846	3.21452	down	lincRNA	3219	chr7	-	73684091	73687309	downstream	NM_001081754	ELN	elastin isoform d precursor	2.13503	1.09425	2.13503	up	chr7	+	73442426	73484236
CR603409	lincRNA-FAM156A	3.39106	1.76174	3.39106	up	lincRNA	1248	chrX	-	52976959	52993397	upstream	NM_018969	GPR173	probable G-protein coupled receptor 173	5.1281	2.35842	5.1281	up	chrX	+	53078505	53109796
ENST00000513381	RP11-834C11.5	-5.25204	-2.39288	5.25204	down	Ensembl	499	chr12	-	54478915	54519614	downstream	NM_022658	HOXC8	homeobox protein Hox-C8	-2.76329	-1.46639	2.76329	down	chr12	+	54402889	54406545
AK302893	lincRNA-MICAL2-1	3.62603	1.85839	3.62603	up	lincRNA	3585	chr11	+	12115542	12284466	upstream	NM_017944	USP47	ubiquitin carboxyl-terminal hydrolase 47	3.2288	1.691	3.2288	up	chr11	+	11862969	11980872
DA088898	lincRNA-INCENP	-3.20729	-1.68135	3.20729	down	lincRNA	560	chr11	+	61740183	61740743	downstream	NM_002407	SCGB2A1	mammaglobin-B precursor	-2.80056	-1.48572	2.80056	down	chr11	+	61976139	61981411
exon2995-	lincRNA-TMEM174-2	-3.3909	-1.76167	3.3909	down	lincRNA	180	chr5	-	72715548	72715727	downstream	NM_153217	TMEM174	transmembrane protein 174	-16.3396	-4.0303	16.3396	down	chr5	+	72469022	72470970
exon2995-	lincRNA-TMEM174-2	-3.3909	-1.76167	3.3909	down	lincRNA	180	chr5	-	72715548	72715727	upstream	NM_001080479	RGNEF	rho-guanine nucleotide exchange factor isoform	-3.92348	-1.97214	3.92348	down	chr5	+	72921982	73237818
ENST00000498198	RP11-428G5.1	2.32398	1.2166	2.32398	up	Ensembl	289	chr12	+	32050753	32051042	downstream	NM_018169	C12orf35	hypothetical protein LOC55196	3.67384	1.87729	3.67384	up	chr12	+	32112352	32146043
AA457263	lincRNA-GPR61	-3.42921	-1.77788	3.42921	down	lincRNA	451	chr1	+	110072368	110072818	upstream	NM_001134404	CYB561D1	cytochrome b561 domain-containing protein 1	-2.56745	-1.36034	2.56745	down	chr1	+	110036700	110043063
AA384551	lincRNA-KIF13B	-3.52194	-1.81637	3.52194	down	lincRNA	304	chr8	-	29146752	29147056	downstream	NM_024567	HMBOX1	homeobox-containing protein 1	3.82134	1.93408	3.82134	up	chr8	+	28748224	28910242
ENST00000433054	RP11-1O7.1	2.48847	1.31526	2.48847	up	Ensembl	884	chr2	+	174162356	174163240	upstream	NM_133646	ZAK	mitogen-activated protein kinase kinase kinase	3.51538	1.81368	3.51538	up	chr2	+	173940564	174091873
DB251409	lincRNA-STARD3NL-2	-2.20704	-1.14211	2.20704	down	lincRNA	551	chr7	+	37960700	38166514	downstream	NM_001003799	TARP	TCR gamma alternate reading frame protein	3.05664	1.61195	3.05664	up	chr7	-	38299243	38313248
ENST00000509266	AC026979.1	-6.00659	-2.58655	6.00659	down	Ensembl	1967	chr8	-	30044816	30047775	upstream	NM_006867	RBPMS	RNA-binding protein with multiple splicing	2.27864	1.18817	2.27864	up	chr8	+	30241943	30429734
chr8:30192504-30200352+	lincRNA-RBPMS-2	2.19271	1.13272	2.19271	up	lincRNA	7849	chr8	+	30192504	30200352	downstream	NM_006867	RBPMS	RNA-binding protein with multiple splicing	2.27864	1.18817	2.27864	up	chr8	+	30241943	30429734
AJ227862		2.92168	1.5468	2.92168	up	misc_RNA	457	chr5	+	102118475	102118934	downstream	NM_000919	PAM	peptidyl-glycine alpha-amidating monooxygenase	3.83429	1.93896	3.83429	up	chr5	+	102201526	102366808
chr1:100774937-100789212+	lincRNA-CDC14A	-2.63177	-1.39603	2.63177	down	lincRNA	14276	chr1	+	100774937	100789212	downstream	NM_003672	CDC14A	dual specificity protein phosphatase CDC14A	2.17213	1.11911	2.17213	up	chr1	+	100818022	100985833
AA827066	lincRNA-KIRREL3-1	-3.76384	-1.9122	3.76384	down	lincRNA	472	chr11	-	128165590	128166053	upstream	NM_001162422	ETS1	protein C-ets-1 isoform 3	-3.83612	-1.93965	3.83612	down	chr11	-	128328655	128392205
NR_024330	NCRNA00085	2.7915	1.48104	2.7915	up	RefSeq_NR	2017	chr19	+	52196592	52208442	upstream	NM_001080405	CEACAM18	carcinoembryonic antigen-related cell adhesion	-2.42869	-1.28018	2.42869	down	chr19	+	51979837	51986611
NR_003013	SCARNA16	8.19356	3.03449	8.19356	up	RefSeq_NR	187	chr17	+	75085388	75085574	downstream	NM_001143998	SEC14L1	SEC14-like protein 1 isoform a	4.43246	2.14811	4.43246	up	chr17	+	75137004	75213181
ENST00000366365	C17orf86	5.0831	2.34571	5.0831	up	Ensembl	1028	chr17	+	75084949	75086180	downstream	NM_001143998	SEC14L1	SEC14-like protein 1 isoform a	4.43246	2.14811	4.43246	up	chr17	+	75137004	75213181
ENST00000392478	AC015815.2	-2.15825	-1.10986	2.15825	down	Ensembl	123	chr17	-	75085985	75087063	upstream	NM_001143998	SEC14L1	SEC14-like protein 1 isoform a	4.43246	2.14811	4.43246	up	chr17	+	75137004	75213181
NR_027058	C17orf86	5.18852	2.37532	5.18852	up	RefSeq_NR	2183	chr17	+	75084724	75091067	downstream	NM_001143998	SEC14L1	SEC14-like protein 1 isoform a	4.43246	2.14811	4.43246	up	chr17	+	75137004	75213181
BX112397	lincRNA-FAM183A-2	-3.45901	-1.79036	3.45901	down	lincRNA	753	chr1	+	43464813	43465491	downstream	NM_144626	TMEM125	transmembrane protein 125	-21.4605	-4.42361	21.4605	down	chr1	+	43735664	43739673
ENST00000499326	AC022087.2	2.00136	1.00098	2.00136	up	Ensembl	717	chr15	+	50647749	50648633	upstream	NM_003645	SLC27A2	very long-chain acyl-CoA synthetase isoform 1	-5.86146	-2.55126	5.86146	down	chr15	+	50474392	50528589
DW462947	lincRNA-GNLY	-2.14542	-1.10126	2.14542	down	lincRNA	365	chr2	-	85969367	85969715	upstream	NM_032827	ATOH8	protein atonal homolog 8	-2.26757	-1.18114	2.26757	down	chr2	+	85980908	86018506
chr1:13902316-13904644-	lincRNA-LRRC38	-2.53781	-1.34358	2.53781	down	lincRNA	2329	chr1	-	13902316	13904644	upstream	NM_015866	PRDM2	PR domain zinc finger protein 2 isoform b	-2.35472	-1.23556	2.35472	down	chr1	+	14031349	14114574
ENST00000450133	RP9P	2.57425	1.36415	2.57425	up	Ensembl	1212	chr7	-	32956426	32982650	downstream	NM_015483	KBTBD2	kelch repeat and BTB domain-containing protein	2.07954	1.05627	2.07954	up	chr7	-	32907777	32931468
BG260387	lincRNA-KRR1	-2.09343	-1.06587	2.09343	down	lincRNA	749	chr12	-	75957052	76377795	upstream	NM_004537	NAP1L1	nucleosome assembly protein 1-like 1	4.54307	2.18367	4.54307	up	chr12	-	76438671	76478738
AJ227862		2.92168	1.5468	2.92168	up	misc_RNA	457	chr5	+	102118475	102118934	downstream	NM_138822	PAM	peptidyl-glycine alpha-amidating monooxygenase	4.02773	2.00997	4.02773	up	chr5	+	102201526	102366808
BX953928	lincRNA-DOK2	-2.94196	-1.55678	2.94196	down	lincRNA	442	chr8	+	21714378	21714822	upstream	NM_001165038	GFRA2	GDNF family receptor alpha-2 isoform b	-2.33278	-1.22205	2.33278	down	chr8	-	21549529	21646346
BX646285	lincRNA-LZTS1-2	-2.05338	-1.038	2.05338	down	lincRNA	659	chr8	-	21436585	21437243	upstream	NM_001165038	GFRA2	GDNF family receptor alpha-2 isoform b	-2.33278	-1.22205	2.33278	down	chr8	-	21549529	21646346
chr12:132296472-132307497-	lincRNA-SFSWAP-1	-3.58864	-1.84344	3.58864	down	lincRNA	11026	chr12	-	132296472	132307497	downstream	NM_004592	SFSWAP	splicing factor, suppressor of white-apricot	3.69972	1.88741	3.69972	up	chr12	+	132195634	132284282
BX093893	lincRNA-GLIPR1	-3.34319	-1.74123	3.34319	down	lincRNA	464	chr12	+	75841430	75841894	downstream	NM_006851	GLIPR1	glioma pathogenesis-related protein 1 precursor	5.19772	2.37788	5.19772	up	chr12	+	75874512	75895716
BG260387	lincRNA-KRR1	-2.09343	-1.06587	2.09343	down	lincRNA	749	chr12	-	75957052	76377795	downstream	NM_006851	GLIPR1	glioma pathogenesis-related protein 1 precursor	5.19772	2.37788	5.19772	up	chr12	+	75874512	75895716
NR_024279	FLJ37453	2.07852	1.05556	2.07852	up	RefSeq_NR	2732	chr1	-	16160709	16174642	downstream	NM_001013641	TMEM82	transmembrane protein 82	-2.23878	-1.16271	2.23878	down	chr1	+	16068916	16074477
ENST00000513381	RP11-834C11.5	-5.25204	-2.39288	5.25204	down	Ensembl	499	chr12	-	54478915	54519614	downstream	NM_173860	HOXC12	homeobox protein Hox-C12	-2.96288	-1.567	2.96288	down	chr12	+	54348713	54350350
AK123196		2.63975	1.4004	2.63975	up	RNAdb	1909	chr2	+	46896008	46897917	upstream	NM_012249	RHOQ	rho-related GTP-binding protein RhoQ precursor	2.07247	1.05135	2.07247	up	chr2	+	46769866	46811827
chr20:2142500-2155375-	lincRNA-STK35	-4.86862	-2.28351	4.86862	down	lincRNA	12876	chr20	-	2142500	2155375	downstream	NM_080792	SIRPA	tyrosine-protein phosphatase non-receptor type	4.01172	2.00422	4.01172	up	chr20	+	1875424	1920540
uc010bol.1	AK307134	2.04073	1.02909	2.04073	up	UCSC_knowngene	2009	chr15	-	96812000	96870577	upstream	NM_001145157	NR2F2	COUP transcription factor 2 isoform c	-2.22804	-1.15578	2.22804	down	chr15	+	96876568	96883492
N80091	lincRNA-SPATA8-3	-2.49802	-1.32079	2.49802	down	lincRNA	436	chr15	+	96886179	96888182	upstream	NM_001145157	NR2F2	COUP transcription factor 2 isoform c	-2.22804	-1.15578	2.22804	down	chr15	+	96876568	96883492
AK307134		2.20979	1.14391	2.20979	up	NRED	840	chr15	-	96813169	96870577	upstream	NM_001145157	NR2F2	COUP transcription factor 2 isoform c	-2.22804	-1.15578	2.22804	down	chr15	+	96876568	96883492
CA442294	lincRNA-PARD3	-2.41197	-1.27021	2.41197	down	lincRNA	693	chr10	+	33653361	33654040	upstream	NM_001024628	NRP1	neuropilin-1 isoform b	6.62018	2.72687	6.62018	up	chr10	-	33486546	33623833
BG210085	lincRNA-PBX1-1	2.47029	1.30468	2.47029	up	lincRNA	282	chr1	+	163369198	163369747	upstream	NM_003617	RGS5	regulator of G-protein signaling 5 isoform 1	22.4984	4.49175	22.4984	up	chr1	-	163112088	163172963
ENST00000490750	RPLP0P2	2.71218	1.43945	2.71218	up	Ensembl	961	chr11	+	61404151	61405112	upstream	NM_145017	C11orf66	IIIG9 protein isoform 1	-4.34647	-2.11984	4.34647	down	chr11	+	61248584	61258400
NR_024607	MGC16121	-2.09854	-1.06939	2.09854	down	RefSeq_NR	786	chrX	-	133677407	133680660	upstream	NM_001170781	FAM122C	hypothetical protein LOC159091 isoform 4	2.06342	1.04504	2.06342	up	chrX	+	133941222	133945211
chr7:117584264-117586960+	lincRNA-NAA38	-4.81852	-2.26859	4.81852	down	lincRNA	2697	chr7	+	117584264	117586960	downstream	NM_016200	NAA38	N-alpha-acetyltransferase 38, NatC auxiliary	2.35294	1.23446	2.35294	up	chr7	+	117824085	117844093
AK129753		4.2806	2.09781	4.2806	up	misc_RNA	2007	chr11	-	86620031	86622038	downstream	NM_007173	PRSS23	serine protease 23 precursor	6.61428	2.72558	6.61428	up	chr11	+	86511490	86522273
exon848+	lincRNA-ZW10	-2.51096	-1.32824	2.51096	down	lincRNA	153	chr11	+	113592424	113592576	downstream	NM_213621	HTR3A	5-hydroxytryptamine receptor 3A isoform a	-3.23604	-1.69423	3.23604	down	chr11	+	113845796	113861034
exon847+	lincRNA-ZW10	-2.3843	-1.25356	2.3843	down	lincRNA	440	chr11	+	113591786	113592225	downstream	NM_213621	HTR3A	5-hydroxytryptamine receptor 3A isoform a	-3.23604	-1.69423	3.23604	down	chr11	+	113845796	113861034
BM043959	lincRNA-ADAMTSL4-2	-2.9244	-1.54814	2.9244	down	lincRNA	754	chr1	-	150541859	150542587	downstream	NM_019032	ADAMTSL4	ADAMTS-like protein 4 isoform 1	2.26193	1.17756	2.26193	up	chr1	+	150521897	150533412
AU185412	lincRNA-LIG3	-2.24478	-1.16658	2.24478	down	lincRNA	629	chr17	+	33306242	33306872	downstream	NM_001014445	NLE1	notchless protein homolog 1 isoform b	-3.99094	-1.99673	3.99094	down	chr17	-	33458367	33469322
ENST00000427064	AC090505.1	-3.05773	-1.61246	3.05773	down	Ensembl	464	chr3	+	194548618	194553321	upstream	NM_153690	FAM43A	hypothetical protein LOC131583	6.90575	2.7878	6.90575	up	chr3	+	194406621	194409766
AL049252		-2.24059	-1.16388	2.24059	down	NRED	3343	chr6	-	30268570	30271892	upstream	NM_025263	PRR3	proline-rich protein 3 isoform a	-2.51015	-1.32777	2.51015	down	chr6	+	30524485	30532473
NR_024053	HCG18	-3.97741	-1.99183	3.97741	down	RefSeq_NR	6600	chr6	-	30255173	30294927	upstream	NM_025263	PRR3	proline-rich protein 3 isoform a	-2.51015	-1.32777	2.51015	down	chr6	+	30524485	30532473
ENST00000423187	RP11-99H8.1	-3.75066	-1.90715	3.75066	down	Ensembl	432	chr1	-	71181615	71185972	upstream	NM_198717	PTGER3	prostaglandin E2 receptor EP3 subtype isoform 7	-3.2163	-1.6854	3.2163	down	chr1	-	71318035	71513491
ENST00000435407	AC024704.2	-3.47646	-1.79762	3.47646	down	Ensembl	416	chr2	-	114586966	114588696	downstream	NM_025181	SLC35F5	solute carrier family 35 member F5	-2.53108	-1.33975	2.53108	down	chr2	-	114471932	114514400
BM043959	lincRNA-ADAMTSL4-2	-2.9244	-1.54814	2.9244	down	lincRNA	754	chr1	-	150541859	150542587	downstream	NM_004698	PRPF3	U4/U6 small nuclear ribonucleoprotein Prp3	4.2244	2.07875	4.2244	up	chr1	+	150293927	150325704
CF128868	lincRNA-DLL1-2	-4.65814	-2.21975	4.65814	down	lincRNA	705	chr6	+	170349016	170349726	downstream	NM_032448	FAM120B	constitutive coactivator of peroxisome	-3.44248	-1.78345	3.44248	down	chr6	+	170615843	170714237
chr14:25152560-25164885-	lincRNA-GZMB	-2.22043	-1.15084	2.22043	down	lincRNA	12326	chr14	-	25152560	25164885	downstream	NM_004131	GZMB	granzyme B precursor	4.08135	2.02904	4.08135	up	chr14	-	25100160	25103432
ENST00000505910	RP11-723O4.3	-4.6558	-2.21903	4.6558	down	Ensembl	329	chr3	+	128588466	128588869	downstream	NM_024768	CCDC48	coiled-coil domain-containing protein 48	3.78082	1.9187	3.78082	up	chr3	+	128720471	128759585
BX104325	lincRNA-FAM102B-1	-5.48279	-2.45491	5.48279	down	lincRNA	451	chr1	+	109073813	109074249	upstream	NM_001143987	NBPF6	neuroblastoma breakpoint family, member 6	-2.20238	-1.13906	2.20238	down	chr1	+	108992903	109013260
BI048312	lincRNA-WNT9A	2.29202	1.19662	2.29202	up	lincRNA	393	chr1	+	227598421	228286740	overlap	NM_178549	ZNF678	zinc finger protein 678	-2.21828	-1.14944	2.21828	down	chr1	+	227751219	227850164
ENST00000344851	RP1-274L14.2	2.69758	1.43167	2.69758	up	Ensembl	1979	chr6	-	158658367	158663829	downstream	NM_032861	SERAC1	protein SERAC1	-3.61005	-1.85202	3.61005	down	chr6	-	158530535	158589312
NR_003277	LOC728643	7.33912	2.87561	7.33912	up	RefSeq_NR	542	chr10	-	47133296	47133836	downstream	NM_014696	GPRIN2	G protein-regulated inducer of neurite outgrowth	-2.60189	-1.37956	2.60189	down	chr10	+	46993545	47000568
AA564591	lincRNA-PPYR1-2	-2.68835	-1.42672	2.68835	down	lincRNA	385	chr10	+	46744329	47220766	overlap	NM_014696	GPRIN2	G protein-regulated inducer of neurite outgrowth	-2.60189	-1.37956	2.60189	down	chr10	+	46993545	47000568
ENST00000422732	RP11-314P12.2	-2.51707	-1.33175	2.51707	down	Ensembl	2444	chr10	-	47096453	47099716	downstream	NM_014696	GPRIN2	G protein-regulated inducer of neurite outgrowth	-2.60189	-1.37956	2.60189	down	chr10	+	46993545	47000568
exon2995-	lincRNA-TMEM174-2	-3.3909	-1.76167	3.3909	down	lincRNA	180	chr5	-	72715548	72715727	upstream	NM_001207	BTF3	transcription factor BTF3 isoform B	2.41057	1.26937	2.41057	up	chr5	+	72794249	72801448
ENST00000435260	AC046176.4	2.13398	1.09355	2.13398	up	Ensembl	1170	chr8	-	56962596	56963766	upstream	NM_001146227	RPS20	40S ribosomal protein S20 isoform 1	-2.80014	-1.4855	2.80014	down	chr8	-	56980738	56987140
uc003nih.2	BC033330	-2.4446	-1.2896	2.4446	down	UCSC_knowngene	2883	chr6	+	26569551	26574925	upstream	NM_006353	HMGN4	high mobility group nucleosome-binding	2.23893	1.16281	2.23893	up	chr6	+	26538571	26547164
NR_024279	FLJ37453	2.07852	1.05556	2.07852	up	RefSeq_NR	2732	chr1	-	16160709	16174642	downstream	NM_001024215	FBLIM1	filamin-binding LIM protein 1 isoform b	2.34023	1.22665	2.34023	up	chr1	+	16090993	16101715
AK294389	lincRNA-RNF103	2.17756	1.12271	2.17756	up	lincRNA	1135	chr2	-	86732790	86948245	upstream	NM_001078170	RGPD2	RANBP2-like and GRIP domain-containing protein	2.27733	1.18734	2.27733	up	chr2	+	87140934	87239861
N48415	lincRNA-ATP11C-1	-2.01659	-1.01192	2.01659	down	lincRNA	541	chrX	-	138928803	138929341	downstream	NM_001171878	MCF2	proto-oncogene DBL isoform e	-2.23154	-1.15804	2.23154	down	chrX	-	138663929	138725000
CV346902	lincRNA-TMEM45B-1	-3.60799	-1.8512	3.60799	down	lincRNA	589	chr11	+	129596130	129596709	downstream	NM_138788	TMEM45B	transmembrane protein 45B	-3.30645	-1.72528	3.30645	down	chr11	+	129685740	129729898
uc003tbd.2	BC041636	4.14468	2.05126	4.14468	up	UCSC_knowngene	1130	chr7	-	30555927	30601744	upstream	NM_006774	INMT	indolethylamine N-methyltransferase isoform 1	-2.34093	-1.22708	2.34093	down	chr7	+	30791750	30797218
AF083120		-2.52564	-1.33665	2.52564	down	misc_RNA	158	chr11	+	62321164	62321291	upstream	NM_003357	SCGB1A1	uteroglobin precursor	2.41942	1.27466	2.41942	up	chr11	+	62186506	62190678
ENST00000421191	XXbac-BPG248L24.10	2.13572	1.09472	2.13572	up	Ensembl	306	chr6	-	31275591	31276326	upstream	NM_205840	LST1	leukocyte-specific transcript 1 protein isoform	2.43646	1.28479	2.43646	up	chr6	+	31554976	31556686
BC002831		27.9497	4.80476	27.9497	up	misc_RNA	1013	chr20	+	57209827	57210789	upstream	NM_153360	APCDD1L	protein APCDD1-like precursor	3.10079	1.63264	3.10079	up	chr20	-	57034425	57089949
ENST00000439558	RP5-907D15.2	3.41471	1.77176	3.41471	up	Ensembl	648	chr20	+	57090782	57149026	upstream	NM_153360	APCDD1L	protein APCDD1-like precursor	3.10079	1.63264	3.10079	up	chr20	-	57034425	57089949
uc001lcv.1	DQ596646	2.11116	1.07804	2.11116	up	UCSC_knowngene	2195	chr10	-	118588285	118590480	downstream	NM_006229	PNLIPRP1	pancreatic lipase-related protein 1 precursor	-4.87958	-2.28676	4.87958	down	chr10	+	118350489	118368686
chr5:170992545-171005495+	lincRNA-FBXW11-1	2.08655	1.06112	2.08655	up	lincRNA	12951	chr5	+	170992545	171005495	upstream	NM_002520	NPM1	nucleophosmin isoform 1	3.0389	1.60355	3.0389	up	chr5	+	170814707	170837888
uc002qsa.2	LOC113386	2.12688	1.08874	2.12688	up	UCSC_knowngene	1396	chr19	+	58816739	58827011	upstream	NM_014480	ZNF544	zinc finger protein 544	2.63321	1.39682	2.63321	up	chr19	+	58740069	58775008
exon2995-	lincRNA-TMEM174-2	-3.3909	-1.76167	3.3909	down	lincRNA	180	chr5	-	72715548	72715727	upstream	NM_001037637	BTF3	transcription factor BTF3 isoform A	4.70156	2.23314	4.70156	up	chr5	+	72794249	72801448
NR_027252	C2orf58	-4.43282	-2.14823	4.43282	down	RefSeq_NR	1776	chr2	+	38358246	38408991	upstream	NM_001170791	FAM82A1	regulator of microtubule dynamics protein 2	-2.51252	-1.32914	2.51252	down	chr2	+	38152461	38244884
AA457263	lincRNA-GPR61	-3.42921	-1.77788	3.42921	down	lincRNA	451	chr1	+	110072368	110072818	downstream	NM_203404	AMPD2	AMP deaminase 2 isoform 3	-5.68536	-2.50725	5.68536	down	chr1	+	110168048	110174677
ENST00000470614	RP11-69M1.1	3.16235	1.661	3.16235	up	Ensembl	315	chr12	-	8147365	8147680	upstream	NM_004054	C3AR1	C3a anaphylatoxin chemotactic receptor	4.94224	2.30516	4.94224	up	chr12	-	8210918	8218955
ENST00000509266	AC026979.1	-6.00659	-2.58655	6.00659	down	Ensembl	1967	chr8	-	30044816	30047775	downstream	NM_015344	LEPROTL1	leptin receptor overlapping transcript-like 1	2.86801	1.52005	2.86801	up	chr8	+	29952921	29965587
chr8:30192504-30200352+	lincRNA-RBPMS-2	2.19271	1.13272	2.19271	up	lincRNA	7849	chr8	+	30192504	30200352	upstream	NM_015344	LEPROTL1	leptin receptor overlapping transcript-like 1	2.86801	1.52005	2.86801	up	chr8	+	29952921	29965587
AK095484		-2.00463	-1.00333	2.00463	down	misc_RNA	2135	chr11	+	43665787	43667921	downstream	NM_139178	ALKBH3	alpha-ketoglutarate-dependent dioxygenase alkB	2.77654	1.47329	2.77654	up	chr11	+	43902356	43941825
chr8:37801630-37818621-	lincRNA-GOT1L1	-2.9149	-1.54345	2.9149	down	lincRNA	16992	chr8	-	37801630	37818621	downstream	NM_025069	ZNF703	zinc finger protein 703	3.67989	1.87966	3.67989	up	chr8	+	37553300	37556396
BE083440	lincRNA-COL5A1-1	3.11266	1.63815	3.11266	up	lincRNA	369	chr9	+	137363031	137363837	upstream	NM_002957	RXRA	retinoic acid receptor RXR-alpha	3.46952	1.79474	3.46952	up	chr9	+	137218315	137332431
BX953928	lincRNA-DOK2	-2.94196	-1.55678	2.94196	down	lincRNA	442	chr8	+	21714378	21714822	downstream	NM_003974	DOK2	docking protein 2	2.03825	1.02733	2.03825	up	chr8	-	21766383	21771205
AA219474	lincRNA-RUNX2-2	-2.07739	-1.05477	2.07739	down	lincRNA	361	chr6	-	45828558	45828919	upstream	NM_021572	ENPP5	ectonucleotide pyrophosphatase/phosphodiesterase	-2.26266	-1.17802	2.26266	down	chr6	-	46127761	46138717
chr9:137160729-137173954-	lincRNA-WDR5-2	2.59473	1.37558	2.59473	up	lincRNA	13226	chr9	-	137160729	137173954	upstream	NM_002957	RXRA	retinoic acid receptor RXR-alpha	3.46952	1.79474	3.46952	up	chr9	+	137218315	137332431
AX747492	lincRNA-HFE2	3.99432	1.99795	3.99432	up	lincRNA	4510	chr1	+	145209144	146424095	upstream	NM_022359	PDE4DIP	myomegalin isoform 3	2.29422	1.198	2.29422	up	chr1	-	144951760	145076186
ENST00000449818	RP11-40H20.2	2.47744	1.30885	2.47744	up	Ensembl	867	chr1	+	27533420	27534287	downstream	NM_032125	TMEM222	transmembrane protein 222	-2.26192	-1.17755	2.26192	down	chr1	+	27648635	27662891
ENST00000438350	RP11-40H20.3	2.48233	1.31169	2.48233	up	Ensembl	221	chr1	+	27537754	27537975	downstream	NM_032125	TMEM222	transmembrane protein 222	-2.26192	-1.17755	2.26192	down	chr1	+	27648635	27662891
AX747038	lincRNA-BANK1-2	-2.37125	-1.24565	2.37125	down	lincRNA	3544	chr4	+	102341117	102995967	upstream	NM_000944	PPP3CA	serine/threonine-protein phosphatase 2B	-2.18025	-1.1245	2.18025	down	chr4	-	101944586	102268628
ENST00000455973	RP11-359N11.1	-2.57684	-1.3656	2.57684	down	Ensembl	470	chr6	-	14230005	14231801	downstream	NM_001165034	RNF182	E3 ubiquitin-protein ligase RNF182	-2.99399	-1.58207	2.99399	down	chr6	+	13924676	13980240
AK098701		-3.57997	-1.83995	3.57997	down	misc_RNA	1416	chr1	+	25031405	25034237	upstream	NM_005839	SRRM1	serine/arginine repetitive matrix protein 1	2.37654	1.24886	2.37654	up	chr1	+	24969593	24999772
ENST00000513381	RP11-834C11.5	-5.25204	-2.39288	5.25204	down	Ensembl	499	chr12	-	54478915	54519614	upstream	NM_015481	ZNF385A	zinc finger protein 385A isoform c	-5.61562	-2.48945	5.61562	down	chr12	-	54762919	54778481
AK125219	lincRNA-HAUS7	4.3357	2.11626	4.3357	up	lincRNA	2124	chrX	-	152713127	152760978	upstream	NM_001170761	SRPK3	serine/threonine-protein kinase SRPK3 isoform 3	-2.56197	-1.35725	2.56197	down	chrX	+	153046455	153051187
AX747492	lincRNA-HFE2	3.99432	1.99795	3.99432	up	lincRNA	4510	chr1	+	145209144	146424095	upstream	NM_001002810	PDE4DIP	myomegalin isoform 4	4.07965	2.02845	4.07965	up	chr1	-	144951760	144995033
uc009wxq.1	BC039493	-5.04824	-2.33578	5.04824	down	UCSC_knowngene	538	chr1	+	181143619	181151340	upstream	NM_016545	IER5	immediate early response gene 5 protein	2.33285	1.22209	2.33285	up	chr1	+	181057637	181059979
chr1:181081092-181121244+	lincRNA-CACNA1E-3	-5.30032	-2.40608	5.30032	down	lincRNA	40153	chr1	+	181081092	181121244	upstream	NM_016545	IER5	immediate early response gene 5 protein	2.33285	1.22209	2.33285	up	chr1	+	181057637	181059979
ENST00000456771	RP11-540K16.2	-2.66056	-1.41173	2.66056	down	Ensembl	532	chr1	-	181159606	181160285	downstream	NM_016545	IER5	immediate early response gene 5 protein	2.33285	1.22209	2.33285	up	chr1	+	181057637	181059979
BX101441	lincRNA-C10orf46-1	-3.78181	-1.91908	3.78181	down	lincRNA	712	chr10	+	120374728	120375440	downstream	NM_153810	C10orf46	chromosome 10 open reading frame 46	3.72264	1.89633	3.72264	up	chr10	-	120440493	120514758
AK097728	lincRNA-PRLHR-1	4.28318	2.09868	4.28318	up	lincRNA	1798	chr10	-	120433633	120514558	overlap	NM_153810	C10orf46	chromosome 10 open reading frame 46	3.72264	1.89633	3.72264	up	chr10	-	120440493	120514758
BM043959	lincRNA-ADAMTSL4-2	-2.9244	-1.54814	2.9244	down	lincRNA	754	chr1	-	150541859	150542587	downstream	NM_004425	ECM1	extracellular matrix protein 1 isoform 1	2.42726	1.27933	2.42726	up	chr1	+	150480486	150486265
AK024617		2.68318	1.42395	2.68318	up	misc_RNA	1862	chr17	+	37710439	37712286	downstream	NM_004448	ERBB2	receptor tyrosine-protein kinase erbB-2 isoform	-4.03776	-2.01355	4.03776	down	chr17	+	37856253	37884915
U26161	lincRNA-FKBP4	-3.28047	-1.7139	3.28047	down	lincRNA	422	chr12	+	2877503	2877919	downstream	NM_003324	TULP3	tubby-related protein 3 isoform 1	2.29195	1.19658	2.29195	up	chr12	+	3000032	3050306
BU657491	lincRNA-CACNA1C	-2.91474	-1.54337	2.91474	down	lincRNA	581	chr12	-	2870365	2879621	upstream	NM_003324	TULP3	tubby-related protein 3 isoform 1	2.29195	1.19658	2.29195	up	chr12	+	3000032	3050306
ENST00000429327	BX322559.2	-4.85644	-2.2799	4.85644	down	Ensembl	192	chr21	-	46796105	46796297	upstream	NM_030582	COL18A1	collagen alpha-1(XVIII) chain isoform 1	-2.0072	-1.00519	2.0072	down	chr21	+	46875423	46933634
ENST00000479610	RP11-59J16.2	-2.60443	-1.38097	2.60443	down	Ensembl	697	chr3	+	127208395	127209630	downstream	NM_172027	ABTB1	ankyrin repeat and BTB/POZ domain-containing	-2.04742	-1.03381	2.04742	down	chr3	+	127391780	127399769
CB265955	lincRNA-RAB4A-5	-3.39186	-1.76208	3.39186	down	lincRNA	616	chr1	+	228918736	228919347	upstream	NM_175055	HIST3H2BB	histone H2B type 3-B	2.55952	1.35587	2.55952	up	chr1	+	228645807	228646259
AK304777	lincRNA-FBLN2-2	14.13	3.82069	14.13	up	lincRNA	3873	chr3	+	13573823	13679512	upstream	NM_024923	NUP210	nuclear pore membrane glycoprotein 210	-3.23775	-1.69499	3.23775	down	chr3	-	13357736	13461809
uc002uns.1	AK125001	-2.02409	-1.01727	2.02409	down	UCSC_knowngene	1765	chr2	+	181988563	182264280	upstream	NM_006357	UBE2E3	ubiquitin-conjugating enzyme E2 E3	-5.33731	-2.41611	5.33731	down	chr2	+	181845341	181928150
AX747492	lincRNA-HFE2	3.99432	1.99795	3.99432	up	lincRNA	4510	chr1	+	145209144	146424095	overlap	NM_014455	RNF115	E3 ubiquitin-protein ligase RNF115	2.73535	1.45173	2.73535	up	chr1	+	145611035	145688776
chr2:223964483-223968702-	lincRNA-KCNE4-1	-2.01571	-1.01128	2.01571	down	lincRNA	4220	chr2	-	223964483	223968702	downstream	NM_203372	ACSL3	long-chain-fatty-acid--CoA ligase 3	-2.23111	-1.15776	2.23111	down	chr2	+	223725731	223808119
AA368654	lincRNA-OPTC	-2.60259	-1.37995	2.60259	down	lincRNA	281	chr1	-	203482904	203483185	upstream	NM_001001396	ATP2B4	plasma membrane calcium-transporting ATPase 4	-2.40058	-1.26338	2.40058	down	chr1	+	203595927	203713209
AK055958		2.09369	1.06605	2.09369	up	misc_RNA	2041	chr14	-	91314205	91316246	upstream	NM_001102367	C14orf159	hypothetical protein LOC80017 isoform a	-2.57717	-1.36579	2.57717	down	chr14	+	91580978	91691703
chr14:25152560-25164885-	lincRNA-GZMB	-2.22043	-1.15084	2.22043	down	lincRNA	12326	chr14	-	25152560	25164885	downstream	NM_015299	KHNYN	protein KHNYN	2.24159	1.16452	2.24159	up	chr14	+	24899140	24910547
chrX:128828944-128841419+	lincRNA-XPNPEP2-2	4.34392	2.119	4.34392	up	lincRNA	12476	chrX	+	128828944	128841419	downstream	NM_003399	XPNPEP2	xaa-Pro aminopeptidase 2 precursor	-17.5307	-4.13181	17.5307	down	chrX	+	128872945	128903525
AK095707		2.07392	1.05236	2.07392	up	misc_RNA	2984	chr16	+	81421429	81424413	downstream	NM_198390	CMIP	C-Maf-inducing protein isoform C-mip	-2.32804	-1.21911	2.32804	down	chr16	+	81478774	81745367
ENST00000421191	XXbac-BPG248L24.10	2.13572	1.09472	2.13572	up	Ensembl	306	chr6	-	31275591	31276326	downstream	NM_014068	PSORS1C1	psoriasis susceptibility 1 candidate 1	7.84918	2.97254	7.84918	up	chr6	+	31082607	31107869
BI048312	lincRNA-WNT9A	2.29202	1.19662	2.29202	up	lincRNA	393	chr1	+	227598421	228286740	overlap	NM_001024228	ARF1	ADP-ribosylation factor 1	-3.2246	-1.68912	3.2246	down	chr1	+	228270850	228286913
chr8:37801630-37818621-	lincRNA-GOT1L1	-2.9149	-1.54345	2.9149	down	lincRNA	16992	chr8	-	37801630	37818621	upstream	NM_004874	BAG4	BAG family molecular chaperone regulator 4	-6.29311	-2.65377	6.29311	down	chr8	+	38034105	38070819
CR749802	lincRNA-MBNL2-1	2.0997	1.07018	2.0997	up	lincRNA	4571	chr13	+	97794089	98046372	downstream	NM_021033	RAP2A	ras-related protein Rap-2a precursor	2.66168	1.41234	2.66168	up	chr13	+	98086474	98120252
chrX:118607438-118617354+	lincRNA-CXorf56-3	-3.22295	-1.68838	3.22295	down	lincRNA	9917	chrX	+	118607438	118617354	upstream	NM_001152	SLC25A5	ADP/ATP translocase 2	-2.64646	-1.40407	2.64646	down	chrX	+	118602362	118605359
chrX:118631438-118670334-	lincRNA-SLC25A5-2	-4.60296	-2.20256	4.60296	down	lincRNA	38897	chrX	-	118631438	118670334	downstream	NM_001152	SLC25A5	ADP/ATP translocase 2	-2.64646	-1.40407	2.64646	down	chrX	+	118602362	118605359
DA088898	lincRNA-INCENP	-3.20729	-1.68135	3.20729	down	lincRNA	560	chr11	+	61740183	61740743	downstream	NM_006551	SCGB1D2	secretoglobin family 1D member 2 precursor	-5.83948	-2.54584	5.83948	down	chr11	+	62009723	62012280
AK296262	lincRNA-PTEN-1	-2.17476	-1.12086	2.17476	down	lincRNA	1121	chr10	-	89892056	90343015	downstream	NM_000314	PTEN	phosphatidylinositol-3,4,5-trisphosphate	2.50638	1.32561	2.50638	up	chr10	+	89623194	89728532
AA457263	lincRNA-GPR61	-3.42921	-1.77788	3.42921	down	lincRNA	451	chr1	+	110072368	110072818	upstream	NM_001134400	CYB561D1	cytochrome b561 domain-containing protein 1	3.72806	1.89843	3.72806	up	chr1	+	110036700	110043063
BX112397	lincRNA-FAM183A-2	-3.45901	-1.79036	3.45901	down	lincRNA	753	chr1	+	43464813	43465491	upstream	NM_001146289	LEPRE1	prolyl 3-hydroxylase 1 isoform 2	3.5267	1.81832	3.5267	up	chr1	-	43212005	43232755
chr17:55283426-55307276+	lincRNA-MSI2	-5.07357	-2.343	5.07357	down	lincRNA	23851	chr17	+	55283426	55307276	downstream	NM_170721	MSI2	RNA-binding protein Musashi homolog 2 isoform b	-2.96761	-1.5693	2.96761	down	chr17	+	55334373	55710544
NR_024279	FLJ37453	2.07852	1.05556	2.07852	up	RefSeq_NR	2732	chr1	-	16160709	16174642	downstream	NM_015164	PLEKHM2	pleckstrin homology domain-containing family M	3.26264	1.70604	3.26264	up	chr1	+	16010826	16061264
AA457263	lincRNA-GPR61	-3.42921	-1.77788	3.42921	down	lincRNA	451	chr1	+	110072368	110072818	downstream	NM_000849	GSTM3	glutathione S-transferase Mu 3	-2.23339	-1.15924	2.23339	down	chr1	-	110276553	110283660
ENST00000412736	MEG3	-2.25443	-1.17276	2.25443	down	Ensembl	1670	chr14	+	101292454	101327308	upstream	NM_024515	WDR25	WD repeat-containing protein 25	-2.4102	-1.26915	2.4102	down	chr14	+	100842832	100996640
exon2439+	lincRNA-PTPN1-2	-2.78425	-1.47729	2.78425	down	lincRNA	272	chr20	+	49050156	49050427	upstream	NM_005194	CEBPB	CCAAT/enhancer-binding protein beta	3.21452	1.6846	3.21452	up	chr20	+	48807375	48809212
ENST00000412736	MEG3	-2.25443	-1.17276	2.25443	down	Ensembl	1670	chr14	+	101292454	101327308	upstream	NM_003836	DLK1	protein delta homolog 1 precursor	-2.27323	-1.18474	2.27323	down	chr14	+	101193201	101201467
chr11:102425615-102440915+	lincRNA-MMP20	-3.12704	-1.6448	3.12704	down	lincRNA	15301	chr11	+	102425615	102440915	upstream	NM_182962	BIRC3	baculoviral IAP repeat-containing protein 3	-3.01939	-1.59426	3.01939	down	chr11	+	102188193	102208465
AK094780	lincRNA-GALNTL2-1	10.4966	3.39185	10.4966	up	lincRNA	3105	chr3	+	15935568	16270147	upstream	NM_000060	BTD	biotinidase precursor	-3.66518	-1.87388	3.66518	down	chr3	+	15643254	15687325
AW167909	lincRNA-WRNIP1	-2.7517	-1.46032	2.7517	down	lincRNA	518	chr6	-	2812462	2812980	upstream	NM_000904	NQO2	ribosyldihydronicotinamide dehydrogenase	-2.73054	-1.44918	2.73054	down	chr6	+	3000066	3019994
ENST00000439330	RP3-393P12.1	-2.92335	-1.54762	2.92335	down	Ensembl	1433	chrX	-	47636225	47638096	downstream	NM_003254	TIMP1	metalloproteinase inhibitor 1 precursor	8.32414	3.0573	8.32414	up	chrX	+	47441689	47446190
ENST00000506371	AC010329.1	-2.30288	-1.20344	2.30288	down	Ensembl	3048	chr19	+	20997934	21005077	downstream	NM_001172671	ZNF430	zinc finger protein 430 isoform 2	2.89528	1.5337	2.89528	up	chr19	+	21203425	21242852
chrX:40874482-40878593+	lincRNA-USP9X-7	-2.54997	-1.35048	2.54997	down	lincRNA	4112	chrX	+	40874482	40878593	downstream	NM_001039590	USP9X	probable ubiquitin carboxyl-terminal hydrolase	2.01094	1.00787	2.01094	up	chrX	+	40944887	41095832
uc002ioy.1	AK097622	-2.1861	-1.12836	2.1861	down	UCSC_knowngene	1754	chr17	-	47535222	47539111	downstream	NM_001135186	ABI3	ABI gene family member 3 isoform 2	2.41137	1.26985	2.41137	up	chr17	+	47287588	47300587
BF818610	lincRNA-PMEPA1-2	-3.5305	-1.81987	3.5305	down	lincRNA	479	chr20	-	56700047	56700510	upstream	NM_178456	C20orf85	hypothetical protein LOC128602	-2.73839	-1.45333	2.73839	down	chr20	+	56725982	56736183
ENST00000451325	RP11-445P17.5	2.46641	1.30241	2.46641	up	Ensembl	435	chr10	-	5346393	5346828	upstream	NM_017422	CALML5	calmodulin-like protein 5	-2.03003	-1.0215	2.03003	down	chr10	-	5540657	5541533
AK296158	lincRNA-TMEM30B-1	4.32899	2.11403	4.32899	up	lincRNA	1756	chr14	+	61654286	62016579	upstream	NM_002431	MNAT1	CDK-activating kinase assembly factor MAT1	2.43125	1.2817	2.43125	up	chr14	+	61201458	61435398
AF083120		-2.52564	-1.33665	2.52564	down	misc_RNA	158	chr11	+	62321164	62321291	downstream	NM_173810	TTC9C	tetratricopeptide repeat protein 9C	2.41279	1.2707	2.41279	up	chr11	+	62495951	62506108
BM043959	lincRNA-ADAMTSL4-2	-2.9244	-1.54814	2.9244	down	lincRNA	754	chr1	-	150541859	150542587	downstream	NM_024579	C1orf54	hypothetical protein LOC79630 precursor	4.90766	2.29504	4.90766	up	chr1	+	150245182	150253335
AK125219	lincRNA-HAUS7	4.3357	2.11626	4.3357	up	lincRNA	2124	chrX	-	152713127	152760978	upstream	NM_021949	ATP2B3	plasma membrane calcium-transporting ATPase 3	-2.03933	-1.0281	2.03933	down	chrX	+	152801579	152848387
AX747492	lincRNA-HFE2	3.99432	1.99795	3.99432	up	lincRNA	4510	chr1	+	145209144	146424095	overlap	NM_003637	ITGA10	integrin alpha-10 precursor	-2.1395	-1.09727	2.1395	down	chr1	+	145524989	145543868
BI048312	lincRNA-WNT9A	2.29202	1.19662	2.29202	up	lincRNA	393	chr1	+	227598421	228286740	downstream	NM_020435	GJC2	gap junction gamma-2 protein	5.32149	2.41183	5.32149	up	chr1	+	228337552	228347527
HIT000243085		-2.45151	-1.29367	2.45151	down	H-invDB	1541	chr7	+	36118694	36125390	downstream	NM_015314	KIAA0895	hypothetical protein LOC23366 isoform 2	-2.59244	-1.37431	2.59244	down	chr7	-	36363758	36406850
ENST00000419108	AC078841.5	-2.30648	-1.20569	2.30648	down	Ensembl	1849	chr7	-	36148633	36150482	upstream	NM_015314	KIAA0895	hypothetical protein LOC23366 isoform 2	-2.59244	-1.37431	2.59244	down	chr7	-	36363758	36406850
AI201851	lincRNA-NFE2L3-3	-5.64805	-2.49775	5.64805	down	lincRNA	347	chr7	+	25988284	25988606	downstream	NM_016587	CBX3	chromobox protein homolog 3	3.79123	1.92267	3.79123	up	chr7	+	26241323	26253227
BX953928	lincRNA-DOK2	-2.94196	-1.55678	2.94196	down	lincRNA	442	chr8	+	21714378	21714822	downstream	NM_022749	FAM160B2	retinoic acid induced 16	2.16052	1.11138	2.16052	up	chr8	+	21946713	21961891
ENST00000411804	RP1-91G5.3	-2.36519	-1.24196	2.36519	down	Ensembl	707	chr1	+	152346429	152417932	downstream	NM_178430	LCE2D	late cornified envelope protein 2D	-2.07777	-1.05504	2.07777	down	chr1	+	152635871	152637135
CD102777	lincRNA-TPTE2	-4.59862	-2.2012	4.59862	down	lincRNA	752	chr13	-	20179522	20180277	upstream	NM_017520	MPHOSPH8	M-phase phosphoprotein 8	3.20474	1.68021	3.20474	up	chr13	+	20207787	20247599
NR_003272	PSPC1	2.49838	1.32099	2.49838	up	RefSeq_NR	1716	chr13	-	20248895	20357083	downstream	NM_017520	MPHOSPH8	M-phase phosphoprotein 8	3.20474	1.68021	3.20474	up	chr13	+	20207787	20247599
ENST00000445083	AC019100.3	-2.86034	-1.51618	2.86034	down	Ensembl	611	chr2	-	108784203	108834297	upstream	NM_001056	SULT1C2	sulfotransferase 1C2 isoform a	-2.0512	-1.03647	2.0512	down	chr2	+	108905094	108926371
ENST00000452402	RP11-250B2.3	2.9144	1.5432	2.9144	up	Ensembl	682	chr6	+	81153060	81175644	upstream	NM_000056	BCKDHB	2-oxoisovalerate dehydrogenase subunit beta,	-4.55185	-2.18645	4.55185	down	chr6	+	80816343	81055987
NR_024279	FLJ37453	2.07852	1.05556	2.07852	up	RefSeq_NR	2732	chr1	-	16160709	16174642	downstream	NM_207348	SLC25A34	solute carrier family 25 member 34	-2.84164	-1.50673	2.84164	down	chr1	+	16062808	16067884
uc001dqu.2	BC030750	2.4197	1.27483	2.4197	up	UCSC_knowngene	1327	chr1	-	95123089	95285834	downstream	NM_001993	F3	tissue factor isoform 1 precursor	-5.00524	-2.32344	5.00524	down	chr1	-	94994731	95007413
ENST00000499326	AC022087.2	2.00136	1.00098	2.00136	up	Ensembl	717	chr15	+	50647749	50648633	upstream	NM_001159629	SLC27A2	very long-chain acyl-CoA synthetase isoform 2	-2.49407	-1.3185	2.49407	down	chr15	+	50474392	50528589
AF083120		-2.52564	-1.33665	2.52564	down	misc_RNA	158	chr11	+	62321164	62321291	downstream	NM_000327	ROM1	rod outer segment membrane protein 1	7.59466	2.92499	7.59466	up	chr11	+	62380212	62382592
ENST00000396599	AC005062.3	2.21676	1.14845	2.21676	up	Ensembl	483	chr7	+	20042387	20042870	upstream	NM_001002926	TWISTNB	DNA-directed RNA polymerase I subunit RPA43	2.3965	1.26093	2.3965	up	chr7	-	19735084	19748660
ENST00000445083	AC019100.3	-2.86034	-1.51618	2.86034	down	Ensembl	611	chr2	-	108784203	108834297	downstream	NM_182588	RGPD4	ranBP2-like and GRIP domain-containing protein	2.56595	1.35949	2.56595	up	chr2	+	108443387	108509000
chr6:13349175-13352025-	lincRNA-TBC1D7	-3.4382	-1.78165	3.4382	down	lincRNA	2851	chr6	-	13349175	13352025	upstream	NM_018988	GFOD1	glucose-fructose oxidoreductase	13.1638	3.71851	13.1638	up	chr6	-	13363818	13487787
AI741919	lincRNA-INO80D	-6.95565	-2.79819	6.95565	down	lincRNA	468	chr2	-	206966865	206967332	upstream	NM_021121	EEF1B2	elongation factor 1-beta	2.7773	1.47368	2.7773	up	chr2	+	207024317	207027653
uc002uwa.2	AOX2	-2.22716	-1.15521	2.22716	down	UCSC_knowngene	978	chr2	+	201635394	201658962	upstream	NM_001100424	SPATS2L	SPATS2-like protein isoform b	2.01423	1.01023	2.01423	up	chr2	+	201170984	201346986
chr5:170992545-171005495+	lincRNA-FBXW11-1	2.08655	1.06112	2.08655	up	lincRNA	12951	chr5	+	170992545	171005495	upstream	NM_199185	NPM1	nucleophosmin isoform 2	4.64724	2.21637	4.64724	up	chr5	+	170814707	170837888
uc003nih.2	BC033330	-2.4446	-1.2896	2.4446	down	UCSC_knowngene	2883	chr6	+	26569551	26574925	upstream	NM_006994	BTN3A3	butyrophilin subfamily 3 member A3 isoform a	-3.77756	-1.91746	3.77756	down	chr6	+	26440699	26453643
AK304777	lincRNA-FBLN2-2	14.13	3.82069	14.13	up	lincRNA	3873	chr3	+	13573823	13679512	downstream	NM_004625	WNT7A	protein Wnt-7a precursor	-2.074	-1.05242	2.074	down	chr3	-	13860081	13921618
BX112397	lincRNA-FAM183A-2	-3.45901	-1.79036	3.45901	down	lincRNA	753	chr1	+	43464813	43465491	upstream	NM_199342	CCDC23	coiled-coil domain-containing protein 23	2.52477	1.33615	2.52477	up	chr1	-	43272722	43283059
DQ916738	lincRNA-ZC3H12C-2	3.33189	1.73634	3.33189	up	lincRNA	2761	chr11	-	110066286	110167437	upstream	NM_004109	FDX1	adrenodoxin, mitochondrial precursor	-2.11699	-1.08202	2.11699	down	chr11	+	110300593	110335605
uc010tgn.1	XTP6	-2.44034	-1.28708	2.44034	down	UCSC_knowngene	1348	chr13	+	50656413	51102670	upstream	NM_001127482	C13orf1	chronic lymphocytic leukemia deletion region	2.29888	1.20093	2.29888	up	chr13	-	50486841	50510625
CD000492	lincRNA-WISP3-2	-5.23341	-2.38775	5.23341	down	lincRNA	304	chr6	+	112311747	112312016	downstream	NM_001105206	LAMA4	laminin subunit alpha-4 isoform 1 precursor	29.0579	4.86086	29.0579	up	chr6	-	112429133	112575828
AY927639		-3.34725	-1.74298	3.34725	down	RNAdb	1483	chr6	+	132319845	132321331	upstream	NM_006208	ENPP1	ectonucleotide pyrophosphatase/phosphodiesterase	2.8472	1.50954	2.8472	up	chr6	+	132129155	132216295
ENST00000449818	RP11-40H20.2	2.47744	1.30885	2.47744	up	Ensembl	867	chr1	+	27533420	27534287	downstream	NM_004672	MAP3K6	mitogen-activated protein kinase kinase kinase	5.63852	2.49532	5.63852	up	chr1	-	27681669	27693337
ENST00000438350	RP11-40H20.3	2.48233	1.31169	2.48233	up	Ensembl	221	chr1	+	27537754	27537975	downstream	NM_004672	MAP3K6	mitogen-activated protein kinase kinase kinase	5.63852	2.49532	5.63852	up	chr1	-	27681669	27693337
ENST00000513381	RP11-834C11.5	-5.25204	-2.39288	5.25204	down	Ensembl	499	chr12	-	54478915	54519614	upstream	NM_014311	SMUG1	single-strand selective monofunctional uracil	2.38137	1.25179	2.38137	up	chr12	-	54575251	54582757
AF083120		-2.52564	-1.33665	2.52564	down	misc_RNA	158	chr11	+	62321164	62321291	upstream	NM_025080	ASRGL1	L-asparaginase	-2.89451	-1.53332	2.89451	down	chr11	+	62104773	62160887
ENST00000421191	XXbac-BPG248L24.10	2.13572	1.09472	2.13572	up	Ensembl	306	chr6	-	31275591	31276326	upstream	NM_001011700	MCCD1	mitochondrial coiled-coil domain protein 1	-25.4966	-4.67224	25.4966	down	chr6	+	31496738	31498008
ENST00000421191	XXbac-BPG248L24.10	2.13572	1.09472	2.13572	up	Ensembl	306	chr6	-	31275591	31276326	upstream	NM_001177519	MICA	MHC class I polypeptide-related sequence A	3.14515	1.65313	3.14515	up	chr6	+	31371370	31383090
ENST00000451325	RP11-445P17.5	2.46641	1.30241	2.46641	up	Ensembl	435	chr10	-	5346393	5346828	downstream	NM_001818	AKR1C4	aldo-keto reductase family 1 member C4	2.0036	1.00259	2.0036	up	chr10	+	5238797	5260910
NR_024330	NCRNA00085	2.7915	1.48104	2.7915	up	RefSeq_NR	2017	chr19	+	52196592	52208442	downstream	NM_002030	FPR3	N-formyl peptide receptor 3	6.55575	2.71276	6.55575	up	chr19	+	52298410	52329334
T19937	lincRNA-LRRC6	-4.10592	-2.03771	4.10592	down	lincRNA	209	chr8	-	133695859	133696068	upstream	NM_032205	PHF20L1	PHD finger protein 20-like protein 1 isoform 2	2.10417	1.07325	2.10417	up	chr8	+	133787603	133837587
AF083120		-2.52564	-1.33665	2.52564	down	misc_RNA	158	chr11	+	62321164	62321291	upstream	NM_024060	AHNAK	neuroblast differentiation-associated protein	6.98856	2.80499	6.98856	up	chr11	-	62201015	62314332
CD000492	lincRNA-WISP3-2	-5.23341	-2.38775	5.23341	down	lincRNA	304	chr6	+	112311747	112312016	downstream	NM_001033564	C6orf225	hypothetical protein LOC619208	2.00305	1.0022	2.00305	up	chr6	+	112408673	112423993
BG896515	lincRNA-MAP3K9-2	-2.29335	-1.19746	2.29335	down	lincRNA	419	chr14	+	71150688	71151023	upstream	NM_003813	ADAM21	disintegrin and metalloproteinase	-3.66927	-1.87549	3.66927	down	chr14	+	70924216	70926622
AA827066	lincRNA-KIRREL3-1	-3.76384	-1.9122	3.76384	down	lincRNA	472	chr11	-	128165590	128166053	upstream	NM_005238	ETS1	protein C-ets-1 isoform 2	-3.43633	-1.78087	3.43633	down	chr11	-	128328655	128392205
AW075897	lincRNA-SIN3A	-2.32663	-1.21824	2.32663	down	lincRNA	521	chr15	-	75750735	75751256	downstream	NM_015492	C15orf39	hypothetical protein LOC56905	2.56633	1.35971	2.56633	up	chr15	+	75494220	75504510
uc002ioy.1	AK097622	-2.1861	-1.12836	2.1861	down	UCSC_knowngene	1754	chr17	-	47535222	47539111	upstream	NM_002507	NGFR	tumor necrosis factor receptor superfamily	3.25759	1.70381	3.25759	up	chr17	+	47572654	47592382
AW269809	lincRNA-KPNA1	-4.18422	-2.06496	4.18422	down	lincRNA	382	chr3	-	122233924	122236198	upstream	NM_001146106	PARP9	poly [ADP-ribose] polymerase 9 isoform c	2.7079	1.43717	2.7079	up	chr3	-	122250619	122283194
ENST00000513381	RP11-834C11.5	-5.25204	-2.39288	5.25204	down	Ensembl	499	chr12	-	54478915	54519614	downstream	NM_153693	HOXC6	homeobox protein Hox-C6 isoform 2	-2.87666	-1.5244	2.87666	down	chr12	+	54410641	54424607
AK304777	lincRNA-FBLN2-2	14.13	3.82069	14.13	up	lincRNA	3873	chr3	+	13573823	13679512	upstream	NM_024827	HDAC11	histone deacetylase 11 isoform 1	3.46971	1.79482	3.46971	up	chr3	+	13521714	13547924
AX747492	lincRNA-HFE2	3.99432	1.99795	3.99432	up	lincRNA	4510	chr1	+	145209144	146424095	overlap	NM_032305	POLR3GL	DNA-directed RNA polymerase III subunit	2.16143	1.11199	2.16143	up	chr1	-	145456235	145470387
NR_024607	MGC16121	-2.09854	-1.06939	2.09854	down	RefSeq_NR	786	chrX	-	133677407	133680660	downstream	NM_001101357	CCDC160	coiled-coil domain-containing protein 160	-4.34366	-2.11891	4.34366	down	chrX	+	133371076	133379808
chr7:143147778-143169303-	lincRNA-TAS2R60	-3.70461	-1.88932	3.70461	down	lincRNA	21526	chr7	-	143147778	143169303	downstream	NM_153345	TMEM139	transmembrane protein 139 isoform a precursor	-2.95493	-1.56312	2.95493	down	chr7	+	142982062	142985141
ENST00000340510	AC004987.7	-5.02625	-2.32948	5.02625	down	Ensembl	3049	chr7	+	39773230	39832691	upstream	NM_020192	C7orf36	hypothetical protein LOC57002	2.01426	1.01025	2.01426	up	chr7	+	39606002	39612480
chr1:100774937-100789212+	lincRNA-CDC14A	-2.63177	-1.39603	2.63177	down	lincRNA	14276	chr1	+	100774937	100789212	upstream	NM_003729	RTCD1	RNA 3'-terminal phosphate cyclase isoform b	2.31772	1.2127	2.31772	up	chr1	+	100731713	100758325
ENST00000411804	RP1-91G5.3	-2.36519	-1.24196	2.36519	down	Ensembl	707	chr1	+	152346429	152417932	downstream	NM_178428	LCE2A	late cornified envelope protein 2A	-2.39081	-1.2575	2.39081	down	chr1	+	152670839	152671918
uc001nnk.1	AB231722	-5.16477	-2.3687	5.16477	down	UCSC_knowngene	158	chr11	+	58746331	58746843	upstream	NM_080661	GLYATL1	glycine N-acyltransferase-like protein 1 isoform	-12.9994	-3.70038	12.9994	down	chr11	+	58710721	58724516
uc001stu.2	BC035381	-4.20979	-2.07375	4.20979	down	UCSC_knowngene	3099	chr12	-	68102828	68123221	downstream	NM_006482	DYRK2	dual specificity	-3.20963	-1.68241	3.20963	down	chr12	+	68042511	68056444
DA335567	lincRNA-NT5C1B-RDH14-4	-2.53785	-1.3436	2.53785	down	lincRNA	585	chr2	+	18059960	18542882	overlap	NM_002252	KCNS3	potassium voltage-gated channel subfamily S	-2.13319	-1.09301	2.13319	down	chr2	+	18059944	18114225
AX747492	lincRNA-HFE2	3.99432	1.99795	3.99432	up	lincRNA	4510	chr1	+	145209144	146424095	overlap	NM_145277	HFE2	hemojuvelin isoform b	-2.60119	-1.37917	2.60119	down	chr1	+	145413190	145417545
AK123657		-2.23265	-1.15876	2.23265	down	misc_RNA	2126	chr11	+	17402952	17405078	upstream	NM_005013	NUCB2	nucleobindin-2 precursor	3.48712	1.80204	3.48712	up	chr11	+	17298285	17353070
ENST00000513381	RP11-834C11.5	-5.25204	-2.39288	5.25204	down	Ensembl	499	chr12	-	54478915	54519614	downstream	NM_014212	HOXC11	homeobox protein Hox-C11	3.1387	1.65017	3.1387	up	chr12	+	54366909	54370203
EC495588	lincRNA-RCN2	-2.9133	-1.54266	2.9133	down	lincRNA	90	chr15	-	77271632	77272065	upstream	NM_003978	PSTPIP1	proline-serine-threonine phosphatase-interacting	-3.83636	-1.93974	3.83636	down	chr15	+	77287464	77329671
exon92-	lincRNA-DMBX1	-4.47961	-2.16337	4.47961	down	lincRNA	197	chr1	-	46992321	46992517	upstream	NM_001097611	KNCN	kinocilin	-3.01784	-1.59352	3.01784	down	chr1	-	47011315	47016887
CA442294	lincRNA-PARD3	-2.41197	-1.27021	2.41197	down	lincRNA	693	chr10	+	33653361	33654040	upstream	NM_001024629	NRP1	neuropilin-1 isoform c	6.72114	2.74871	6.72114	up	chr10	-	33486546	33623833
AK296158	lincRNA-TMEM30B-1	4.32899	2.11403	4.32899	up	lincRNA	1756	chr14	+	61654286	62016579	upstream	NM_153811	SLC38A6	probable sodium-coupled neutral amino acid	2.24233	1.165	2.24233	up	chr14	+	61447831	61519261
ENST00000415349	AC125238.4	2.25242	1.17147	2.25242	up	Ensembl	1299	chr2	-	204629017	204630316	upstream	NM_005214	CTLA4	cytotoxic T-lymphocyte protein 4 isoform a	-2.19899	-1.13684	2.19899	down	chr2	+	204732508	204738683
ENST00000396848	AC010138.3	2.12902	1.09019	2.12902	up	Ensembl	867	chr2	-	204637353	204638225	upstream	NM_005214	CTLA4	cytotoxic T-lymphocyte protein 4 isoform a	-2.19899	-1.13684	2.19899	down	chr2	+	204732508	204738683
AK124977	lincRNA-UNKL-2	2.04485	1.03199	2.04485	up	lincRNA	2638	chr16	-	1413205	1464704	upstream	NM_024600	TMEM204	transmembrane protein 204	4.10358	2.03688	4.10358	up	chr16	+	1584230	1605243
ENST00000421191	XXbac-BPG248L24.10	2.13572	1.09472	2.13572	up	Ensembl	306	chr6	-	31275591	31276326	upstream	NM_005007	NFKBIL1	NF-kappa-B inhibitor-like protein 1 isoform 1	-2.97331	-1.57207	2.97331	down	chr6	+	31515352	31526606
AW269809	lincRNA-KPNA1	-4.18422	-2.06496	4.18422	down	lincRNA	382	chr3	-	122233924	122236198	downstream	NM_014367	FAM162A	growth and transformation-dependent protein	2.03377	1.02415	2.03377	up	chr3	+	122103022	122128961
AW075897	lincRNA-SIN3A	-2.32663	-1.21824	2.32663	down	lincRNA	521	chr15	-	75750735	75751256	upstream	NM_153271	SNX33	sorting nexin-33	-2.33169	-1.22138	2.33169	down	chr15	+	75941347	75950968
CD000492	lincRNA-WISP3-2	-5.23341	-2.38775	5.23341	down	lincRNA	304	chr6	+	112311747	112312016	downstream	NM_001105208	LAMA4	laminin subunit alpha-4 isoform 3 precursor	12.5919	3.65442	12.5919	up	chr6	-	112574985	112575828
BF737354	lincRNA-VDAC2	-2.35295	-1.23447	2.35295	down	lincRNA	545	chr10	+	76956241	76956749	upstream	NM_001174156	SAMD8	sphingomyelin synthase-related protein 1 isoform	2.10108	1.07113	2.10108	up	chr10	+	76871392	76941881
uc001jxd.1	AK023445	3.06004	1.61355	3.06004	up	UCSC_knowngene	1860	chr10	+	77056147	77121436	upstream	NM_001174156	SAMD8	sphingomyelin synthase-related protein 1 isoform	2.10108	1.07113	2.10108	up	chr10	+	76871392	76941881
BC009210	lincRNA-KIAA1199	2.38788	1.25573	2.38788	up	lincRNA	2959	chr15	-	81239669	81282169	overlap	NM_015154	MESDC2	LDLR chaperone MESD	2.45005	1.29281	2.45005	up	chr15	-	81268094	81282205
AA457263	lincRNA-GPR61	-3.42921	-1.77788	3.42921	down	lincRNA	451	chr1	+	110072368	110072818	downstream	NM_147148	GSTM4	glutathione S-transferase Mu 4 isoform 2	-2.32829	-1.21927	2.32829	down	chr1	+	110198697	110208123
NR_033373	FLJ39534	-2.2261	-1.15452	2.2261	down	RefSeq_NR	2540	chr3	+	47205859	47285605	upstream	NM_000316	PTH1R	parathyroid hormone/parathyroid hormone-related	-5.65417	-2.49931	5.65417	down	chr3	+	46919235	46945289
CD676340	lincRNA-FAM84B-3	-2.71998	-1.4436	2.71998	down	lincRNA	634	chr8	+	126479180	126553604	upstream	NM_173685	NSMCE2	E3 SUMO-protein ligase NSE2	2.9579	1.56457	2.9579	up	chr8	+	126104082	126379367
NR_027022	LOC127841	-2.2102	-1.14418	2.2102	down	RefSeq_NR	1290	chr1	-	204337557	204338847	downstream	NM_198447	GOLT1A	vesicle transport protein GOT1A	-2.02238	-1.01605	2.02238	down	chr1	-	204167287	204183220
AL049252		-2.24059	-1.16388	2.24059	down	NRED	3343	chr6	-	30268570	30271892	downstream	NM_014596	ZNRD1	DNA-directed RNA polymerase I subunit RPA12	2.5774	1.36592	2.5774	up	chr6	+	30029035	30032686
NR_024053	HCG18	-3.97741	-1.99183	3.97741	down	RefSeq_NR	6600	chr6	-	30255173	30294927	downstream	NM_014596	ZNRD1	DNA-directed RNA polymerase I subunit RPA12	2.5774	1.36592	2.5774	up	chr6	+	30029035	30032686
ENST00000424605	RP11-125B21.2	-2.35992	-1.23874	2.35992	down	Ensembl	746	chr9	-	2535651	2570754	upstream	NM_133497	KCNV2	potassium voltage-gated channel subfamily V	-2.09686	-1.06823	2.09686	down	chr9	+	2717525	2730037
BG427746	lincRNA-VLDLR-2	-2.69296	-1.42919	2.69296	down	lincRNA	882	chr9	-	2704036	2704737	upstream	NM_133497	KCNV2	potassium voltage-gated channel subfamily V	-2.09686	-1.06823	2.09686	down	chr9	+	2717525	2730037
AA587541	lincRNA-MEF2A	-2.78342	-1.47686	2.78342	down	lincRNA	441	chr15	+	99976938	99977379	downstream	NM_001171894	MEF2A	myocyte-specific enhancer factor 2A isoform 2	-2.38246	-1.25245	2.38246	down	chr15	+	100106132	100256629
AK124977	lincRNA-UNKL-2	2.04485	1.03199	2.04485	up	lincRNA	2638	chr16	-	1413205	1464704	upstream	NM_144570	HN1L	hematological and neurological expressed 1-like	2.57856	1.36657	2.57856	up	chr16	+	1728277	1752073
AY927639		-3.34725	-1.74298	3.34725	down	RNAdb	1483	chr6	+	132319845	132321331	upstream	NM_005021	ENPP3	ectonucleotide pyrophosphatase/phosphodiesterase	4.7499	2.2479	4.7499	up	chr6	+	131958441	132068550
uc003nih.2	BC033330	-2.4446	-1.2896	2.4446	down	UCSC_knowngene	2883	chr6	+	26569551	26574925	upstream	NM_001145008	BTN3A1	butyrophilin subfamily 3 member A1 isoform c	3.66522	1.8739	3.66522	up	chr6	+	26402464	26415444
ENST00000359838	RP3-337D23.3	-4.34255	-2.11854	4.34255	down	Ensembl	453	chr6	+	147480060	147502128	downstream	NM_001127715	STXBP5	syntaxin-binding protein 5 isoform b	-2.00529	-1.00381	2.00529	down	chr6	+	147525507	147708707
AJ227862		2.92168	1.5468	2.92168	up	misc_RNA	457	chr5	+	102118475	102118934	downstream	NM_138766	PAM	peptidyl-glycine alpha-amidating monooxygenase	4.22483	2.07889	4.22483	up	chr5	+	102201526	102366808
chrX:118607438-118617354+	lincRNA-CXorf56-3	-3.22295	-1.68838	3.22295	down	lincRNA	9917	chrX	+	118607438	118617354	downstream	NM_001105576	ANKRD58	ankyrin repeat domain-containing protein 58	2.24471	1.16653	2.24471	up	chrX	+	118892575	118894165
chrX:118631438-118670334-	lincRNA-SLC25A5-2	-4.60296	-2.20256	4.60296	down	lincRNA	38897	chrX	-	118631438	118670334	upstream	NM_001105576	ANKRD58	ankyrin repeat domain-containing protein 58	2.24471	1.16653	2.24471	up	chrX	+	118892575	118894165
ENST00000435407	AC024704.2	-3.47646	-1.79762	3.47646	down	Ensembl	416	chr2	-	114586966	114588696	downstream	NM_007082	RABL2A	rab-like protein 2A	2.28688	1.19338	2.28688	up	chr2	+	114384816	114400975
ENST00000419987	RP11-188P8.2	-2.06554	-1.04652	2.06554	down	Ensembl	799	chr10	+	20036751	20037550	downstream	NM_032812	PLXDC2	plexin domain-containing protein 2 precursor	3.66696	1.87458	3.66696	up	chr10	+	20105371	20569115
ENST00000421191	XXbac-BPG248L24.10	2.13572	1.09472	2.13572	up	Ensembl	306	chr6	-	31275591	31276326	upstream	NM_001145466	NCR3	natural cytotoxicity triggering receptor 3	-2.54163	-1.34576	2.54163	down	chr6	-	31556659	31560762
ENST00000509266	AC026979.1	-6.00659	-2.58655	6.00659	down	Ensembl	1967	chr8	-	30044816	30047775	upstream	NM_001008710	RBPMS	RNA-binding protein with multiple splicing	-4.40684	-2.13974	4.40684	down	chr8	+	30241943	30429734
chr8:30192504-30200352+	lincRNA-RBPMS-2	2.19271	1.13272	2.19271	up	lincRNA	7849	chr8	+	30192504	30200352	downstream	NM_001008710	RBPMS	RNA-binding protein with multiple splicing	-4.40684	-2.13974	4.40684	down	chr8	+	30241943	30429734
DW462947	lincRNA-GNLY	-2.14542	-1.10126	2.14542	down	lincRNA	365	chr2	-	85969367	85969715	downstream	NM_006433	GNLY	granulysin isoform NKG5	2.3435	1.22866	2.3435	up	chr2	+	85921413	85925875
ENST00000500215	AC007686.1	-4.69924	-2.23243	4.69924	down	Ensembl	2924	chr14	+	77507406	77535846	downstream	NM_033426	KIAA1737	hypothetical protein LOC85457	-4.80112	-2.26337	4.80112	down	chr14	+	77564577	77583630
ENST00000445083	AC019100.3	-2.86034	-1.51618	2.86034	down	Ensembl	611	chr2	-	108784203	108834297	upstream	NM_006588	SULT1C4	sulfotransferase 1C4	2.12595	1.08811	2.12595	up	chr2	+	108994420	109004270
chr5:172696910-172713472-	lincRNA-NKX2-5-2	2.61161	1.38494	2.61161	up	lincRNA	16563	chr5	-	172696910	172713472	downstream	NM_001166175	NKX2-5	homeobox protein Nkx-2.5 isoform 2	-3.54378	-1.82529	3.54378	down	chr5	-	172659106	172662315
ENST00000441207	RP4-742C19.11	2.66046	1.41167	2.66046	up	Ensembl	421	chr22	+	39551529	39551950	upstream	NM_001006666	APOBEC3F	DNA dC->dU-editing enzyme APOBEC-3F isoform b	3.17278	1.66575	3.17278	up	chr22	+	39436672	39440428
NR_033315	BDNFOS	-5.24418	-2.39072	5.24418	down	RefSeq_NR	1437	chr11	+	27528398	27719716	upstream	NM_030771	CCDC34	coiled-coil domain-containing protein 34 isoform	2.11683	1.0819	2.11683	up	chr11	-	27360060	27384795
NR_033313	BDNFOS	-5.7809	-2.53129	5.7809	down	RefSeq_NR	1279	chr11	+	27528398	27719716	upstream	NM_030771	CCDC34	coiled-coil domain-containing protein 34 isoform	2.11683	1.0819	2.11683	up	chr11	-	27360060	27384795
DW462947	lincRNA-GNLY	-2.14542	-1.10126	2.14542	down	lincRNA	365	chr2	-	85969367	85969715	downstream	NM_016494	RNF181	E3 ubiquitin-protein ligase RNF181	2.0048	1.00346	2.0048	up	chr2	+	85822836	85824831
uc010wkl.1	DQ589083	2.10986	1.07715	2.10986	up	UCSC_knowngene	1661	chr17	-	45126240	45127901	downstream	NM_054022	GOSR2	Golgi SNAP receptor complex member 2 isoform B	2.24358	1.1658	2.24358	up	chr17	+	45000485	45018733
BX115115	lincRNA-ACTR2	2.02264	1.01624	2.02264	up	lincRNA	649	chr2	-	65501495	65502138	downstream	NM_015147	CEP68	centrosomal protein of 68 kDa	4.67696	2.22557	4.67696	up	chr2	+	65283494	65314142
uc003mto.2	BC087858	-3.2231	-1.68845	3.2231	down	UCSC_knowngene	1322	chr6	+	1496349	1519554	upstream	NM_033260	FOXQ1	forkhead box protein Q1	-8.05122	-3.00921	8.05122	down	chr6	+	1312674	1314993
uc001nnk.1	AB231722	-5.16477	-2.3687	5.16477	down	UCSC_knowngene	158	chr11	+	58746331	58746843	downstream	NM_022074	FAM111A	hypothetical protein LOC63901	2.59519	1.37584	2.59519	up	chr11	+	58912251	58922511
AK125219	lincRNA-HAUS7	4.3357	2.11626	4.3357	up	lincRNA	2124	chrX	-	152713127	152760978	upstream	NM_001170760	SRPK3	serine/threonine-protein kinase SRPK3 isoform 2	-4.77517	-2.25555	4.77517	down	chrX	+	153046455	153051187
AK124977	lincRNA-UNKL-2	2.04485	1.03199	2.04485	up	lincRNA	2638	chr16	-	1413205	1464704	downstream	NM_003294	TPSAB1	tryptase alpha/beta-1 precursor	7.01634	2.81072	7.01634	up	chr16	+	1290677	1292555
chr8:49776604-49779322+	lincRNA-SNAI2-1	-2.40932	-1.26863	2.40932	down	lincRNA	2719	chr8	+	49776604	49779322	downstream	NM_001007176	C8orf22	pancreatic progenitor cell differentiation and	5.46816	2.45106	5.46816	up	chr8	+	49984902	49988642
NR_027022	LOC127841	-2.2102	-1.14418	2.2102	down	RefSeq_NR	1290	chr1	-	204337557	204338847	downstream	NM_000537	REN	renin preproprotein	-2.1986	-1.13658	2.1986	down	chr1	-	204123943	204135465
CR603409	lincRNA-FAM156A	3.39106	1.76174	3.39106	up	lincRNA	1248	chrX	-	52976959	52993397	upstream	NM_022117	TSPYL2	testis-specific Y-encoded-like protein 2	4.30343	2.10549	4.30343	up	chrX	+	53111541	53117728
DW462947	lincRNA-GNLY	-2.14542	-1.10126	2.14542	down	lincRNA	365	chr2	-	85969367	85969715	downstream	NM_006634	VAMP5	vesicle-associated membrane protein 5	4.45986	2.157	4.45986	up	chr2	+	85811530	85820511
ENST00000470614	RP11-69M1.1	3.16235	1.661	3.16235	up	Ensembl	315	chr12	-	8147365	8147680	downstream	NM_024865	NANOG	homeobox protein NANOG	-2.03943	-1.02817	2.03943	down	chr12	+	7941994	7948655
chr20:541348-562112+	lincRNA-TCF15	-2.02853	-1.02043	2.02853	down	lincRNA	20765	chr20	+	541348	562112	upstream	NM_021158	TRIB3	tribbles homolog 3	5.71931	2.51584	5.71931	up	chr20	+	361307	378203
DB302574	lincRNA-INSM2	-2.11413	-1.08006	2.11413	down	lincRNA	570	chr14	+	35898616	35899186	upstream	NM_002791	PSMA6	proteasome subunit alpha type-6	2.07035	1.04988	2.07035	up	chr14	+	35761573	35786682
uc003tbd.2	BC041636	4.14468	2.05126	4.14468	up	UCSC_knowngene	1130	chr7	-	30555927	30601744	upstream	NM_002047	GARS	glycyl-tRNA synthetase	2.22107	1.15125	2.22107	up	chr7	+	30634180	30673648
ENST00000498198	RP11-428G5.1	2.32398	1.2166	2.32398	up	Ensembl	289	chr12	+	32050753	32051042	downstream	NM_001003398	BICD1	protein bicaudal D homolog 1 isoform 2	8.35495	3.06263	8.35495	up	chr12	+	32260184	32531141
AK296262	lincRNA-PTEN-1	-2.17476	-1.12086	2.17476	down	lincRNA	1121	chr10	-	89892056	90343015	upstream	NM_020799	STAMBPL1	AMSH-like protease	20.9229	4.38701	20.9229	up	chr10	+	90640025	90683244
chr9:87653896-87666946-	lincRNA-NTRK2	-4.82804	-2.27144	4.82804	down	lincRNA	13051	chr9	-	87653896	87666946	downstream	NM_001007097	NTRK2	BDNF/NT-3 growth factors receptor isoform b	-4.80025	-2.26311	4.80025	down	chr9	+	87284625	87430621
ENST00000417149	RP11-298E9.6	-2.33276	-1.22204	2.33276	down	Ensembl	390	chr10	-	3282562	3299402	downstream	NM_002627	PFKP	6-phosphofructokinase type C isoform 1	5.98105	2.5804	5.98105	up	chr10	+	3109751	3178996
ENST00000451364	RP11-429G19.2	-2.02828	-1.02026	2.02828	down	Ensembl	716	chr10	-	97621069	97849912	overlap	NM_001001732	CC2D2B	protein CC2D2B isoform 2	-2.19368	-1.13336	2.19368	down	chr10	+	97759847	97792441
chr8:86474623-86517048-	lincRNA-CA2	-3.23028	-1.69166	3.23028	down	lincRNA	42426	chr8	-	86474623	86517048	downstream	NM_001128831	CA1	carbonic anhydrase 1	-2.06616	-1.04695	2.06616	down	chr8	-	86240457	86290342
chr1:39116163-39128263+	lincRNA-RRAGC-1	-2.58729	-1.37144	2.58729	down	lincRNA	12101	chr1	+	39116163	39128263	downstream	NM_022157	RRAGC	ras-related GTP-binding protein C	2.37929	1.25053	2.37929	up	chr1	-	39305014	39325340
uc010bol.1	AK307134	2.04073	1.02909	2.04073	up	UCSC_knowngene	2009	chr15	-	96812000	96870577	upstream	NM_021005	NR2F2	COUP transcription factor 2 isoform a	-2.02529	-1.01813	2.02529	down	chr15	+	96874110	96883492
N80091	lincRNA-SPATA8-3	-2.49802	-1.32079	2.49802	down	lincRNA	436	chr15	+	96886179	96888182	upstream	NM_021005	NR2F2	COUP transcription factor 2 isoform a	-2.02529	-1.01813	2.02529	down	chr15	+	96874110	96883492
AK307134		2.20979	1.14391	2.20979	up	NRED	840	chr15	-	96813169	96870577	upstream	NM_021005	NR2F2	COUP transcription factor 2 isoform a	-2.02529	-1.01813	2.02529	down	chr15	+	96874110	96883492
NR_024330	NCRNA00085	2.7915	1.48104	2.7915	up	RefSeq_NR	2017	chr19	+	52196592	52208442	downstream	NM_001462	FPR2	N-formyl peptide receptor 2	3.45207	1.78746	3.45207	up	chr19	+	52266641	52273779
BX485243	lincRNA-SRP54	-2.28952	-1.19504	2.28952	down	lincRNA	590	chr14	+	35432234	35432824	downstream	NM_001079519	FAM177A1	hypothetical protein LOC283635 isoform 2	-2.94649	-1.559	2.94649	down	chr14	+	35514112	35552589
AA136769	lincRNA-INSIG2-2	-5.58144	-2.48064	5.58144	down	lincRNA	356	chr2	-	118984269	118984617	downstream	NM_016133	INSIG2	insulin-induced gene 2 protein	2.18288	1.12623	2.18288	up	chr2	+	118846049	118867597
BI048312	lincRNA-WNT9A	2.29202	1.19662	2.29202	up	lincRNA	393	chr1	+	227598421	228286740	downstream	NM_052843	OBSCN	obscurin isoform a	2.67398	1.41899	2.67398	up	chr1	+	228395860	228548951
AK226132	lincRNA-ZFP106	2.45484	1.29563	2.45484	up	lincRNA	5684	chr15	-	42707320	42783303	downstream	NM_213600	PLA2G4F	cytosolic phospholipase A2 zeta	2.56542	1.3592	2.56542	up	chr15	-	42433331	42448839
CD000492	lincRNA-WISP3-2	-5.23341	-2.38775	5.23341	down	lincRNA	304	chr6	+	112311747	112312016	downstream	NM_001105209	LAMA4	laminin subunit alpha-4 isoform 3 precursor	3.03819	1.60321	3.03819	up	chr6	-	112574985	112575828
AK294389	lincRNA-RNF103	2.17756	1.12271	2.17756	up	lincRNA	1135	chr2	-	86732790	86948245	downstream	NM_145644	MRPL35	39S ribosomal protein L35, mitochondrial isoform	2.28934	1.19493	2.28934	up	chr2	+	86426555	86440477
BG260387	lincRNA-KRR1	-2.09343	-1.06587	2.09343	down	lincRNA	749	chr12	-	75957052	76377795	upstream	NM_139207	NAP1L1	nucleosome assembly protein 1-like 1	3.68292	1.88085	3.68292	up	chr12	-	76438671	76478738

## Sheet: 104T vs 104N
# Condition pairs: 104T vs 104N # Fold Change cut-off: 2.0 This table contains the differentially expressed lincRNA and nearby coding gene pairs (distance < 300 kb). # Column A: seqname, the sequence identifier. # Column B: GeneSymbol, the symbol of the LncRNA. # Column C: Fold change - LncRNAs, the ratio of normalized intensities between two samples, positive value indicates up-regulation, and n…
seqname	GeneSymbol	Fold change - LncRNAs	Log Fold change - LncRNAs	Absolute Fold change - LncRNAs	Regulation - LncRNAs	source	RNAlength	Chrom	Strand	txStart	txEnd	GenomeRelationship	NearbyGene	NearbyGeneSymbol	NearbyProteinName	Fold change - mRNAs	Log Fold change - mRNAs	Absolute Fold change - mRNAs	Regulation - mRNAs	NearbyGeneChrom	NearbyGeneStrand	NearbyGenetxStart	NearbyGenetxEnd
BY797754	lincRNA-ZNF469-2	2.05623	1.04	2.05623	up	lincRNA	538	chr16	+	88333119	88333657	downstream	NM_001127464	ZNF469	zinc finger protein 469	4.23285	2.08163	4.23285	up	chr16	+	88493878	88507165
ENST00000477702	NCRNA00173	2.93379	1.55276	2.93379	up	Ensembl	314	chr12	+	116973868	116974323	downstream	NM_001109903	RNFT2	RING finger and transmembrane domain-containing	2.20055	1.13786	2.20055	up	chr12	+	117176095	117291436
NR_027345	NCRNA00173	4.69436	2.23093	4.69436	up	RefSeq_NR	1597	chr12	+	116971226	116973326	downstream	NM_001109903	RNFT2	RING finger and transmembrane domain-containing	2.20055	1.13786	2.20055	up	chr12	+	117176095	117291436
BX953928	lincRNA-DOK2	-4.19002	-2.06696	4.19002	down	lincRNA	442	chr8	+	21714378	21714822	downstream	NM_001114137	EPB49	dematin isoform 2	-2.13118	-1.09165	2.13118	down	chr8	+	21911080	21940036
chr7:143147778-143169303-	lincRNA-TAS2R60	-2.00134	-1.00097	2.00134	down	lincRNA	21526	chr7	-	143147778	143169303	downstream	NM_176882	TAS2R40	taste receptor type 2 member 40	-3.14463	-1.65289	3.14463	down	chr7	+	142919171	142920143
BC009210	lincRNA-KIAA1199	4.7089	2.23539	4.7089	up	lincRNA	2959	chr15	-	81239669	81282169	upstream	NM_172217	IL16	pro-interleukin-16 isoform 2	3.10912	1.63651	3.10912	up	chr15	+	81517639	81605104
ENST00000453082	SNORD115-26	2.68604	1.42548	2.68604	up	Ensembl	6087	chr15	+	25463498	25620623	upstream	NM_003097	SNRPN	small nuclear ribonucleoprotein-associated	-3.17691	-1.66762	3.17691	down	chr15	+	25200134	25223729
uc002ilc.1	CR602880	3.54758	1.82684	3.54758	up	UCSC_knowngene	2080	chr17	-	45132466	45177627	upstream	NM_000212	ITGB3	integrin beta-3 precursor	-2.14509	-1.10104	2.14509	down	chr17	+	45331207	45390077
uc010wkm.1	CR624169	2.37327	1.24688	2.37327	up	UCSC_knowngene	416	chr17	-	45128651	45129168	upstream	NM_000212	ITGB3	integrin beta-3 precursor	-2.14509	-1.10104	2.14509	down	chr17	+	45331207	45390077
ENST00000420287	RP11-505F3.4	3.11461	1.63905	3.11461	up	Ensembl	408	chr13	-	73674715	73675123	downstream	NM_006346	PIBF1	progesterone-induced-blocking factor 1	-2.14908	-1.10372	2.14908	down	chr13	+	73356229	73590591
AF191495	lincRNA-F11R	4.76494	2.25246	4.76494	up	lincRNA	2187	chr1	-	160967605	161008711	upstream	NM_001102566	PCP4L1	Purkinje cell protein 4-like protein 1	-2.06982	-1.04951	2.06982	down	chr1	+	161228516	161255240
uc004exm.2	BC007360	3.00549	1.5876	3.00549	up	UCSC_knowngene	646	chrX	-	133678458	133680653	downstream	NM_000194	HPRT1	hypoxanthine-guanine phosphoribosyltransferase	-3.08131	-1.62354	3.08131	down	chrX	+	133594174	133634698
ENST00000440570	AC004383.4	2.02603	1.01866	2.02603	up	Ensembl	760	chrX	-	133677366	133680662	downstream	NM_000194	HPRT1	hypoxanthine-guanine phosphoribosyltransferase	-3.08131	-1.62354	3.08131	down	chrX	+	133594174	133634698
uc002cuc.2	BC013599	2.99968	1.58481	2.99968	up	UCSC_knowngene	1114	chr16	-	3178836	3182043	downstream	NM_001012633	IL32	interleukin-32 isoform A	4.49109	2.16707	4.49109	up	chr16	+	3115312	3119668
ENST00000423122	RP11-65J3.1	-3.1311	-1.64667	3.1311	down	Ensembl	545	chr9	+	132104121	132121817	downstream	NM_014064	METTL11A	alpha N-terminal protein methyltransferase 1A	-2.84222	-1.50702	2.84222	down	chr9	+	132388434	132397879
AA368654	lincRNA-OPTC	-5.39556	-2.43177	5.39556	down	lincRNA	281	chr1	-	203482904	203483185	downstream	NM_002725	PRELP	prolargin precursor	-2.28955	-1.19507	2.28955	down	chr1	+	203444882	203460479
AK000839		-2.20794	-1.1427	2.20794	down	misc_RNA	1951	chr17	-	46657698	46659621	downstream	NM_001075099	SKAP1	src kinase-associated phosphoprotein 1 isoform	2.71108	1.43887	2.71108	up	chr17	-	46210801	46507594
AK124321	lincRNA-RNF32-3	-3.49665	-1.80597	3.49665	down	lincRNA	2538	chr7	+	155755325	155759037	upstream	NM_000193	SHH	sonic hedgehog protein preproprotein	-3.27458	-1.71131	3.27458	down	chr7	-	155595557	155604967
BC036541	lincRNA-ZNF280D	-2.39508	-1.26007	2.39508	down	lincRNA	4811	chr15	-	56945018	57210767	downstream	NM_018365	MNS1	meiosis-specific nuclear structural protein 1	2.14493	1.10093	2.14493	up	chr15	-	56720928	56757335
BX953928	lincRNA-DOK2	-4.19002	-2.06696	4.19002	down	lincRNA	442	chr8	+	21714378	21714822	downstream	NM_182795	NPM2	nucleoplasmin-2	-2.7855	-1.47794	2.7855	down	chr8	+	21882353	21894408
AL832122		2.6514	1.40675	2.6514	up	misc_RNA	5572	chr1	-	23607802	23613245	upstream	NM_003196	TCEA3	transcription elongation factor A protein 3	3.25777	1.70388	3.25777	up	chr1	-	23707554	23751261
chr10:74002486-74020610+	lincRNA-DDIT4-1	-2.39599	-1.26062	2.39599	down	lincRNA	18125	chr10	+	74002486	74020610	downstream	NM_019058	DDIT4	DNA damage-inducible transcript 4 protein	12.4838	3.64199	12.4838	up	chr10	+	74033676	74035797
ENST00000421191	XXbac-BPG248L24.10	3.16652	1.6629	3.16652	up	Ensembl	306	chr6	-	31275591	31276326	upstream	NM_001166538	LST1	leukocyte-specific transcript 1 protein isoform	4.7488	2.24756	4.7488	up	chr6	+	31554976	31556686
ENST00000393071	AC013474.3	-3.83921	-1.94081	3.83921	down	Ensembl	732	chr2	-	127315006	127315739	upstream	NM_002101	GYPC	glycophorin-C isoform 1	-2.10454	-1.07351	2.10454	down	chr2	+	127413683	127454246
uc003nih.2	BC033330	-2.52292	-1.3351	2.52292	down	UCSC_knowngene	2883	chr6	+	26569551	26574925	upstream	NM_007047	BTN3A2	butyrophilin subfamily 3 member A2 isoform a	4.29648	2.10316	4.29648	up	chr6	+	26365397	26378548
AK097728	lincRNA-PRLHR-1	3.70756	1.89047	3.70756	up	lincRNA	1798	chr10	-	120433633	120514558	downstream	NM_004248	PRLHR	prolactin-releasing peptide receptor	-2.57521	-1.36469	2.57521	down	chr10	-	120352915	120355160
BX101441	lincRNA-C10orf46-1	-2.19711	-1.13561	2.19711	down	lincRNA	712	chr10	+	120374728	120375440	upstream	NM_004248	PRLHR	prolactin-releasing peptide receptor	-2.57521	-1.36469	2.57521	down	chr10	-	120352915	120355160
CR609715		2.33524	1.22357	2.33524	up	misc_RNA	1695	chr1	-	247350699	247352392	downstream	NM_003431	ZNF124	zinc finger protein 124	2.01418	1.01019	2.01418	up	chr1	-	247319202	247335318
uc003nih.2	BC033330	-2.52292	-1.3351	2.52292	down	UCSC_knowngene	2883	chr6	+	26569551	26574925	upstream	NM_001145009	BTN3A1	butyrophilin subfamily 3 member A1 isoform d	8.13152	3.02353	8.13152	up	chr6	+	26402464	26415444
BG013335	lincRNA-DIRAS2-2	-2.19845	-1.13649	2.19845	down	lincRNA	249	chr9	+	92444316	92444560	upstream	NM_006705	GADD45G	growth arrest and DNA damage-inducible protein	3.11858	1.64089	3.11858	up	chr9	+	92219926	92221469
exon2995-	lincRNA-TMEM174-2	-2.38396	-1.25336	2.38396	down	lincRNA	180	chr5	-	72715548	72715727	downstream	NM_153217	TMEM174	transmembrane protein 174	-4.83084	-2.27227	4.83084	down	chr5	+	72469022	72470970
uc002cuc.2	BC013599	2.99968	1.58481	2.99968	up	UCSC_knowngene	1114	chr16	-	3178836	3182043	downstream	NM_152341	PAQR4	progestin and adipoQ receptor family member 4	4.57214	2.19287	4.57214	up	chr16	+	3019341	3023485
chr13:20881350-20901600+	lincRNA-CRYL1	-2.66371	-1.41344	2.66371	down	lincRNA	20251	chr13	+	20881350	20901600	downstream	NM_175605	IFT88	intraflagellar transport protein 88 homolog	-2.0388	-1.02772	2.0388	down	chr13	+	21141207	21265576
AK096322	lincRNA-FBRS	2.47757	1.30893	2.47757	up	lincRNA	2890	chr16	+	30671242	30682130	upstream	NM_145271	ZNF688	zinc finger protein 688 isoform a	-2.01116	-1.00803	2.01116	down	chr16	-	30581018	30583728
ENST00000433054	RP11-1O7.1	2.41679	1.27309	2.41679	up	Ensembl	884	chr2	+	174162356	174163240	upstream	NM_133646	ZAK	mitogen-activated protein kinase kinase kinase	3.14791	1.6544	3.14791	up	chr2	+	173940564	174091873
AK096322	lincRNA-FBRS	2.47757	1.30893	2.47757	up	lincRNA	2890	chr16	+	30671242	30682130	upstream	NM_015527	TBC1D10B	TBC1 domain family member 10B	2.66975	1.41671	2.66975	up	chr16	-	30368421	30381522
ENST00000366408	RP11-375F2.2	-2.42421	-1.27751	2.42421	down	Ensembl	1129	chr1	-	168873142	169056243	upstream	NM_003666	BLZF1	Golgin-45	2.76927	1.4695	2.76927	up	chr1	+	169337193	169365780
AF191495	lincRNA-F11R	4.76494	2.25246	4.76494	up	lincRNA	2187	chr1	-	160967605	161008711	upstream	NM_003001	SDHC	succinate dehydrogenase cytochrome b560 subunit,	-2.07195	-1.05099	2.07195	down	chr1	+	161284165	161334535
ENST00000427447	AP000569.8	2.20192	1.13876	2.20192	up	Ensembl	9124	chr21	+	35303463	35349992	downstream	NM_006933	SLC5A3	sodium/myo-inositol cotransporter	-2.19535	-1.13445	2.19535	down	chr21	+	35445869	35478561
AK096322	lincRNA-FBRS	2.47757	1.30893	2.47757	up	lincRNA	2890	chr16	+	30671242	30682130	upstream	NM_152652	ZNF48	zinc finger protein 48 isoform 1	3.08163	1.6237	3.08163	up	chr16	+	30407056	30410715
AW086055	lincRNA-PRRC2C	3.09969	1.63213	3.09969	up	lincRNA	378	chr1	-	171562278	171562866	downstream	NM_002022	FMO4	dimethylaniline monooxygenase [N-oxide-forming]	-2.39913	-1.26251	2.39913	down	chr1	+	171283485	171311223
EB388332	lincRNA-MYOC	4.16217	2.05734	4.16217	up	lincRNA	699	chr1	+	171561933	171562679	upstream	NM_002022	FMO4	dimethylaniline monooxygenase [N-oxide-forming]	-2.39913	-1.26251	2.39913	down	chr1	+	171283485	171311223
ENST00000420922	AC073043.2	2.07002	1.04964	2.07002	up	Ensembl	772	chr2	-	200625272	200715596	upstream	NM_024520	C2orf47	hypothetical protein LOC79568 precursor	-4.41492	-2.14239	4.41492	down	chr2	+	200820039	200828847
ENST00000425356	RP11-54K16.2	2.1616	1.1121	2.1616	up	Ensembl	484	chr9	-	33019679	33020163	upstream	NM_016410	CHMP5	charged multivesicular body protein 5 isoform 1	-2.7188	-1.44297	2.7188	down	chr9	+	33264876	33282067
chrX:118631438-118670334-	lincRNA-SLC25A5-2	-2.03708	-1.0265	2.03708	down	lincRNA	38897	chrX	-	118631438	118670334	downstream	NM_006667	PGRMC1	membrane-associated progesterone receptor	-3.30428	-1.72434	3.30428	down	chrX	+	118370210	118378429
ENST00000415709	CRYBB2P1	2.56694	1.36005	2.56694	up	Ensembl	538	chr22	+	25851678	25855648	upstream	NM_000496	CRYBB2	beta-crystallin B2	3.56311	1.83314	3.56311	up	chr22	+	25615611	25627836
AK123196		2.78621	1.47831	2.78621	up	RNAdb	1909	chr2	+	46896008	46897917	upstream	NM_012249	RHOQ	rho-related GTP-binding protein RhoQ precursor	2.94987	1.56065	2.94987	up	chr2	+	46769866	46811827
chr10:74002486-74020610+	lincRNA-DDIT4-1	-2.39599	-1.26062	2.39599	down	lincRNA	18125	chr10	+	74002486	74020610	downstream	NM_001002762	DNAJB12	dnaJ homolog subfamily B member 12	2.15974	1.11086	2.15974	up	chr10	-	74092587	74114907
chr10:102330185-102341910+	lincRNA-PAX2-1	-2.80974	-1.49043	2.80974	down	lincRNA	11726	chr10	+	102330185	102341910	downstream	NM_003987	PAX2	paired box protein Pax-2 isoform a	2.98943	1.57987	2.98943	up	chr10	+	102505467	102589698
uc004exm.2	BC007360	3.00549	1.5876	3.00549	up	UCSC_knowngene	646	chrX	-	133678458	133680653	upstream	NM_001170781	FAM122C	hypothetical protein LOC159091 isoform 4	2.36569	1.24226	2.36569	up	chrX	+	133941222	133945211
ENST00000440570	AC004383.4	2.02603	1.01866	2.02603	up	Ensembl	760	chrX	-	133677366	133680662	upstream	NM_001170781	FAM122C	hypothetical protein LOC159091 isoform 4	2.36569	1.24226	2.36569	up	chrX	+	133941222	133945211
chr7:117584264-117586960+	lincRNA-NAA38	-3.54468	-1.82565	3.54468	down	lincRNA	2697	chr7	+	117584264	117586960	downstream	NM_016200	NAA38	N-alpha-acetyltransferase 38, NatC auxiliary	2.24421	1.16621	2.24421	up	chr7	+	117824085	117844093
exon848+	lincRNA-ZW10	-2.31405	-1.21042	2.31405	down	lincRNA	153	chr11	+	113592424	113592576	downstream	NM_213621	HTR3A	5-hydroxytryptamine receptor 3A isoform a	-2.30136	-1.20249	2.30136	down	chr11	+	113845796	113861034
exon847+	lincRNA-ZW10	-2.31281	-1.20964	2.31281	down	lincRNA	440	chr11	+	113591786	113592225	downstream	NM_213621	HTR3A	5-hydroxytryptamine receptor 3A isoform a	-2.30136	-1.20249	2.30136	down	chr11	+	113845796	113861034
uc002cuc.2	BC013599	2.99968	1.58481	2.99968	up	UCSC_knowngene	1114	chr16	-	3178836	3182043	downstream	NM_001042428	ZNF205	zinc finger protein 205	-2.82052	-1.49596	2.82052	down	chr16	+	3162562	3170518
uc002vga.1	AX747067	2.34687	1.23074	2.34687	up	UCSC_knowngene	2348	chr2	+	217079049	217081397	upstream	NM_001142311	TMEM169	transmembrane protein 169	4.04045	2.01452	4.04045	up	chr2	+	216946588	216967506
AK125138	lincRNA-SH3BP5L	4.05011	2.01796	4.05011	up	lincRNA	3859	chr1	-	249104650	249120832	upstream	NM_024836	ZNF672	zinc finger protein 672	4.47075	2.16052	4.47075	up	chr1	+	249132529	249143714
uc002cuc.2	BC013599	2.99968	1.58481	2.99968	up	UCSC_knowngene	1114	chr16	-	3178836	3182043	downstream	NM_001012635	IL32	interleukin-32 isoform C	2.29229	1.19679	2.29229	up	chr16	+	3115611	3119668
AK299029	lincRNA-RAPGEF3	-4.62139	-2.20833	4.62139	down	lincRNA	2776	chr12	-	48131323	48164823	upstream	NM_001143843	TMEM106C	transmembrane protein 106C isoform b	-3.07119	-1.6188	3.07119	down	chr12	+	48357329	48362661
G30682		-2.10461	-1.07355	2.10461	down	misc_RNA	278	chr7	+	66817837	66818115	upstream	NM_022906	STAG3L4	STAG3-like protein 4	-2.15471	-1.10749	2.15471	down	chr7	+	66767615	66786513
ENST00000432358	RP11-732M18.3	2.54707	1.34884	2.54707	up	Ensembl	424	chr6	+	158703294	158733390	upstream	NM_032861	SERAC1	protein SERAC1	-2.34638	-1.23044	2.34638	down	chr6	-	158530535	158589312
ENST00000344851	RP1-274L14.2	2.55538	1.35354	2.55538	up	Ensembl	1979	chr6	-	158658367	158663829	downstream	NM_032861	SERAC1	protein SERAC1	-2.34638	-1.23044	2.34638	down	chr6	-	158530535	158589312
AA564591	lincRNA-PPYR1-2	-3.01522	-1.59226	3.01522	down	lincRNA	385	chr10	+	46744329	47220766	overlap	NM_014696	GPRIN2	G protein-regulated inducer of neurite outgrowth	3.45537	1.78884	3.45537	up	chr10	+	46993545	47000568
ENST00000477702	NCRNA00173	2.93379	1.55276	2.93379	up	Ensembl	314	chr12	+	116973868	116974323	downstream	NM_024738	C12orf49	hypothetical protein LOC79794 precursor	2.59062	1.3733	2.59062	up	chr12	-	117153595	117175843
NR_027345	NCRNA00173	4.69436	2.23093	4.69436	up	RefSeq_NR	1597	chr12	+	116971226	116973326	downstream	NM_024738	C12orf49	hypothetical protein LOC79794 precursor	2.59062	1.3733	2.59062	up	chr12	-	117153595	117175843
exon2995-	lincRNA-TMEM174-2	-2.38396	-1.25336	2.38396	down	lincRNA	180	chr5	-	72715548	72715727	upstream	NM_001207	BTF3	transcription factor BTF3 isoform B	-2.11432	-1.08019	2.11432	down	chr5	+	72794249	72801448
AK124977	lincRNA-UNKL-2	2.50674	1.32581	2.50674	up	lincRNA	2638	chr16	-	1413205	1464704	downstream	NM_194259	UBE2I	SUMO-conjugating enzyme UBC9	-2.02424	-1.01738	2.02424	down	chr16	+	1359637	1375390
AX747492	lincRNA-HFE2	3.39448	1.76319	3.39448	up	lincRNA	4510	chr1	+	145209144	146424095	overlap	NM_001097616	GPR89C	putative Golgi pH regulator C	-3.49016	-1.80329	3.49016	down	chr1	+	145883867	145924049
BC037864	lincRNA-CD247	5.09607	2.34939	5.09607	up	lincRNA	4577	chr1	+	167391146	167395664	downstream	NM_052862	RCSD1	capZ-interacting protein	5.30006	2.40601	5.30006	up	chr1	+	167599473	167675486
chr5:172618919-172633619+	lincRNA-NKX2-5-1	-2.44621	-1.29055	2.44621	down	lincRNA	14701	chr5	+	172618919	172633619	upstream	NM_001031711	ERGIC1	endoplasmic reticulum-Golgi intermediate	5.6601	2.50083	5.6601	up	chr5	+	172261222	172379688
EC495588	lincRNA-RCN2	-2.88345	-1.52779	2.88345	down	lincRNA	90	chr15	-	77271632	77272065	downstream	NM_002902	RCN2	reticulocalbin-2 precursor	-4.13094	-2.04647	4.13094	down	chr15	+	77223961	77242601
exon95+	lincRNA-KNCN	-2.39692	-1.26118	2.39692	down	lincRNA	271	chr1	+	46997334	46997604	upstream	NM_001441	FAAH	fatty-acid amide hydrolase 1	-7.94038	-2.98921	7.94038	down	chr1	+	46859938	46879520
ENST00000421191	XXbac-BPG248L24.10	3.16652	1.6629	3.16652	up	Ensembl	306	chr6	-	31275591	31276326	upstream	NM_205840	LST1	leukocyte-specific transcript 1 protein isoform	3.5914	1.84455	3.5914	up	chr6	+	31554976	31556686
AK131566	lincRNA-NR4A1	-4.25033	-2.08757	4.25033	down	lincRNA	3513	chr12	+	52431498	52453285	downstream	NM_002284	KRT86	keratin, type II cuticular Hb6	3.37656	1.75555	3.37656	up	chr12	+	52695648	52702947
uc002qsa.2	LOC113386	-2.61186	-1.38508	2.61186	down	UCSC_knowngene	1396	chr19	+	58816739	58827011	upstream	NM_014480	ZNF544	zinc finger protein 544	2.14819	1.10312	2.14819	up	chr19	+	58740069	58775008
BX953928	lincRNA-DOK2	-4.19002	-2.06696	4.19002	down	lincRNA	442	chr8	+	21714378	21714822	downstream	NM_003974	DOK2	docking protein 2	6.35123	2.66703	6.35123	up	chr8	-	21766383	21771205
chr9:137160729-137173954-	lincRNA-WDR5-2	3.97557	1.99116	3.97557	up	lincRNA	13226	chr9	-	137160729	137173954	upstream	NM_002957	RXRA	retinoic acid receptor RXR-alpha	2.26866	1.18184	2.26866	up	chr9	+	137218315	137332431
AX747492	lincRNA-HFE2	3.39448	1.76319	3.39448	up	lincRNA	4510	chr1	+	145209144	146424095	upstream	NM_022359	PDE4DIP	myomegalin isoform 3	-2.81643	-1.49387	2.81643	down	chr1	-	144951760	145076186
ENST00000504610	AP002841.2	-2.08292	-1.05861	2.08292	down	Ensembl	2746	chr11	+	112141474	112233257	upstream	NM_001082969	C11orf57	hypothetical protein LOC55216 isoform a	4.1556	2.05506	4.1556	up	chr11	+	111944967	111955874
BI048312	lincRNA-WNT9A	3.19873	1.6775	3.19873	up	lincRNA	393	chr1	+	227598421	228286740	overlap	NM_053052	SNAP47	synaptosomal-associated protein 47	3.12857	1.6455	3.12857	up	chr1	+	227922696	227968932
AK316271	lincRNA-SUCLA2-1	-4.54225	-2.18341	4.54225	down	lincRNA	1801	chr13	-	48517468	48612125	upstream	NM_021999	ITM2B	integral membrane protein 2B	-9.54792	-3.25519	9.54792	down	chr13	+	48807273	48836232
ENST00000446783	RP11-40H20.1	-2.85332	-1.51264	2.85332	down	Ensembl	640	chr1	-	27527324	27527964	upstream	NM_032125	TMEM222	transmembrane protein 222	-2.36818	-1.24378	2.36818	down	chr1	+	27648635	27662891
uc002cuc.2	BC013599	2.99968	1.58481	2.99968	up	UCSC_knowngene	1114	chr16	-	3178836	3182043	downstream	NM_001002017	HCFC1R1	host cell factor C1 regulator 1 isoform 2	3.30062	1.72274	3.30062	up	chr16	-	3072625	3074287
AX747492	lincRNA-HFE2	3.39448	1.76319	3.39448	up	lincRNA	4510	chr1	+	145209144	146424095	upstream	NM_001002810	PDE4DIP	myomegalin isoform 4	3.92464	1.97256	3.92464	up	chr1	-	144951760	144995033
uc009wxq.1	BC039493	-2.01005	-1.00723	2.01005	down	UCSC_knowngene	538	chr1	+	181143619	181151340	upstream	NM_016545	IER5	immediate early response gene 5 protein	5.0037	2.32299	5.0037	up	chr1	+	181057637	181059979
chr1:181081092-181121244+	lincRNA-CACNA1E-3	-2.37372	-1.24715	2.37372	down	lincRNA	40153	chr1	+	181081092	181121244	upstream	NM_016545	IER5	immediate early response gene 5 protein	5.0037	2.32299	5.0037	up	chr1	+	181057637	181059979
ENST00000456771	RP11-540K16.2	-2.44859	-1.29195	2.44859	down	Ensembl	532	chr1	-	181159606	181160285	downstream	NM_016545	IER5	immediate early response gene 5 protein	5.0037	2.32299	5.0037	up	chr1	+	181057637	181059979
BX953928	lincRNA-DOK2	-4.19002	-2.06696	4.19002	down	lincRNA	442	chr8	+	21714378	21714822	downstream	NM_024815	NUDT18	nucleoside diphosphate-linked moiety X motif 18	3.21183	1.68339	3.21183	up	chr8	-	21964382	21966932
BU657491	lincRNA-CACNA1C	-2.6489	-1.40539	2.6489	down	lincRNA	581	chr12	-	2870365	2879621	upstream	NM_003324	TULP3	tubby-related protein 3 isoform 1	3.31867	1.73061	3.31867	up	chr12	+	3000032	3050306
ENST00000429327	BX322559.2	-2.2232	-1.15264	2.2232	down	Ensembl	192	chr21	-	46796105	46796297	upstream	NM_030582	COL18A1	collagen alpha-1(XVIII) chain isoform 1	-2.23835	-1.16243	2.23835	down	chr21	+	46875423	46933634
uc001iuc.2	BC043365	2.23233	1.15855	2.23233	up	UCSC_knowngene	2078	chr10	-	28811613	28821460	upstream	NM_016628	WAC	WW domain-containing adapter protein with	2.03934	1.0281	2.03934	up	chr10	+	28822423	28909923
chr1:29096302-29111760-	lincRNA-YTHDF2	-3.10441	-1.63432	3.10441	down	lincRNA	15459	chr1	-	29096302	29111760	downstream	NM_001172828	YTHDF2	YTH domain family protein 2 isoform 2	2.00648	1.00467	2.00648	up	chr1	+	29063451	29096287
ENST00000456895	AC068196.1	-2.48335	-1.31229	2.48335	down	Ensembl	833	chr2	-	181940777	181970695	downstream	NM_006357	UBE2E3	ubiquitin-conjugating enzyme E2 E3	-2.10514	-1.07391	2.10514	down	chr2	+	181845341	181928150
AK131566	lincRNA-NR4A1	-4.25033	-2.08757	4.25033	down	lincRNA	3513	chr12	+	52431498	52453285	downstream	NM_005556	KRT7	keratin, type II cytoskeletal 7	-3.60933	-1.85173	3.60933	down	chr12	+	52626953	52642709
AF191495	lincRNA-F11R	4.76494	2.25246	4.76494	up	lincRNA	2187	chr1	-	160967605	161008711	upstream	NM_001035513	SDHC	succinate dehydrogenase cytochrome b560 subunit,	-2.67099	-1.41737	2.67099	down	chr1	+	161284165	161334535
DA922283	lincRNA-TH	-3.3167	-1.72975	3.3167	down	lincRNA	568	chr11	-	2229882	2230451	upstream	NM_005706	TSSC4	protein TSSC4	2.37567	1.24833	2.37567	up	chr11	+	2423522	2425106
ENST00000421191	XXbac-BPG248L24.10	3.16652	1.6629	3.16652	up	Ensembl	306	chr6	-	31275591	31276326	downstream	NM_014068	PSORS1C1	psoriasis susceptibility 1 candidate 1	8.45153	3.07921	8.45153	up	chr6	+	31082607	31107869
chrX:118631438-118670334-	lincRNA-SLC25A5-2	-2.03708	-1.0265	2.03708	down	lincRNA	38897	chrX	-	118631438	118670334	downstream	NM_001152	SLC25A5	ADP/ATP translocase 2	-5.1901	-2.37576	5.1901	down	chrX	+	118602362	118605359
AK096322	lincRNA-FBRS	2.47757	1.30893	2.47757	up	lincRNA	2890	chr16	+	30671242	30682130	downstream	NM_152288	ORAI3	protein orai-3	5.26553	2.39658	5.26553	up	chr16	+	30960404	30966259
uc002cuc.2	BC013599	2.99968	1.58481	2.99968	up	UCSC_knowngene	1114	chr16	-	3178836	3182043	downstream	NM_020982	CLDN9	claudin-9	-3.06048	-1.61376	3.06048	down	chr16	+	3062456	3064506
ENST00000405813	AP003356.1	-2.35143	-1.23354	2.35143	down	Ensembl	534	chr8	+	103819069	103819607	downstream	NM_001695	ATP6V1C1	V-type proton ATPase subunit C 1	2.34993	1.23262	2.34993	up	chr8	+	104033247	104085285
BY797754	lincRNA-ZNF469-2	2.05623	1.04	2.05623	up	lincRNA	538	chr16	+	88333119	88333657	downstream	NM_153813	ZFPM1	zinc finger protein ZFPM1	-2.48913	-1.31564	2.48913	down	chr16	+	88520013	88601574
ENST00000413983	RP11-410N8.3	-2.94389	-1.55772	2.94389	down	Ensembl	469	chr20	+	31148894	31161690	downstream	NM_012325	MAPRE1	microtubule-associated protein RP/EB family	2.12227	1.08561	2.12227	up	chr20	+	31407698	31438211
AK096322	lincRNA-FBRS	2.47757	1.30893	2.47757	up	lincRNA	2890	chr16	+	30671242	30682130	upstream	NM_024031	PRR14	proline-rich protein 14	2.138	1.09626	2.138	up	chr16	+	30662240	30667734
AW167909	lincRNA-WRNIP1	-2.20111	-1.13823	2.20111	down	lincRNA	518	chr6	-	2812462	2812980	upstream	NM_000904	NQO2	ribosyldihydronicotinamide dehydrogenase	-4.03766	-2.01352	4.03766	down	chr6	+	3000066	3019994
AF191495	lincRNA-F11R	4.76494	2.25246	4.76494	up	lincRNA	2187	chr1	-	160967605	161008711	upstream	NM_001035512	SDHC	succinate dehydrogenase cytochrome b560 subunit,	-2.16059	-1.11142	2.16059	down	chr1	+	161284165	161334535
ENST00000506371	AC010329.1	-2.56263	-1.35763	2.56263	down	Ensembl	3048	chr19	+	20997934	21005077	downstream	NM_001172671	ZNF430	zinc finger protein 430 isoform 2	2.32052	1.21445	2.32052	up	chr19	+	21203425	21242852
AK096322	lincRNA-FBRS	2.47757	1.30893	2.47757	up	lincRNA	2890	chr16	+	30671242	30682130	downstream	NM_001080417	ZNF629	zinc finger protein 629	3.59501	1.846	3.59501	up	chr16	-	30789769	30798523
AB002362	lincRNA-IGSF1	-2.05206	-1.03707	2.05206	down	lincRNA	5413	chrX	-	130407484	130712873	overlap	NM_001004486	OR13H1	olfactory receptor 13H1	-2.41571	-1.27245	2.41571	down	chrX	+	130678047	130678974
uc001hje.2	CR624623	3.91294	1.96825	3.91294	up	UCSC_knowngene	838	chr1	-	212731175	212732013	downstream	NM_013349	NENF	neudesin precursor	2.14584	1.10154	2.14584	up	chr1	+	212606228	212619721
chrX:118631438-118670334-	lincRNA-SLC25A5-2	-2.03708	-1.0265	2.03708	down	lincRNA	38897	chrX	-	118631438	118670334	upstream	NM_003336	UBE2A	ubiquitin-conjugating enzyme E2 A isoform 1	-2.32962	-1.22009	2.32962	down	chrX	+	118708498	118718379
ENST00000504610	AP002841.2	-2.08292	-1.05861	2.08292	down	Ensembl	2746	chr11	+	112141474	112233257	upstream	NM_003002	SDHD	succinate dehydrogenase [ubiquinone] cytochrome	-6.82186	-2.77017	6.82186	down	chr11	+	111957570	111966518
uc003nih.2	BC033330	-2.52292	-1.3351	2.52292	down	UCSC_knowngene	2883	chr6	+	26569551	26574925	upstream	NM_003543	HIST1H4H	histone H4	2.26543	1.17979	2.26543	up	chr6	-	26285353	26285727
AK096322	lincRNA-FBRS	2.47757	1.30893	2.47757	up	lincRNA	2890	chr16	+	30671242	30682130	overlap	NM_001105079	FBRS	probable fibrosin-1	2.68311	1.42391	2.68311	up	chr16	+	30675777	30682131
BI048312	lincRNA-WNT9A	3.19873	1.6775	3.19873	up	lincRNA	393	chr1	+	227598421	228286740	downstream	NM_020435	GJC2	gap junction gamma-2 protein	2.69807	1.43193	2.69807	up	chr1	+	228337552	228347527
uc002vga.1	AX747067	2.34687	1.23074	2.34687	up	UCSC_knowngene	2348	chr2	+	217079049	217081397	upstream	NM_021141	XRCC5	X-ray repair cross-complementing protein 5	3.60162	1.84865	3.60162	up	chr2	+	216974019	217071016
N80091	lincRNA-SPATA8-3	-2.33303	-1.2222	2.33303	down	lincRNA	436	chr15	+	96886179	96888182	upstream	NM_001145156	NR2F2	COUP transcription factor 2 isoform c	-2.17061	-1.1181	2.17061	down	chr15	+	96875793	96883492
ENST00000452402	RP11-250B2.3	-2.7276	-1.44763	2.7276	down	Ensembl	682	chr6	+	81153060	81175644	upstream	NM_000056	BCKDHB	2-oxoisovalerate dehydrogenase subunit beta,	-7.94021	-2.98918	7.94021	down	chr6	+	80816343	81055987
AF083120		-2.01739	-1.01249	2.01739	down	misc_RNA	158	chr11	+	62321164	62321291	downstream	NM_000327	ROM1	rod outer segment membrane protein 1	2.41658	1.27297	2.41658	up	chr11	+	62380212	62382592
AK095608		2.02917	1.02089	2.02917	up	NRED	2784	chrX	+	15719056	15721845	downstream	NM_005089	ZRSR2	U2 small nuclear ribonucleoprotein auxiliary	2.90377	1.53793	2.90377	up	chrX	+	15808573	15841382
uc002cuc.2	BC013599	2.99968	1.58481	2.99968	up	UCSC_knowngene	1114	chr16	-	3178836	3182043	downstream	NM_017885	HCFC1R1	host cell factor C1 regulator 1 isoform 1	-2.39558	-1.26037	2.39558	down	chr16	-	3072625	3074287
uc002cuc.2	BC013599	2.99968	1.58481	2.99968	up	UCSC_knowngene	1114	chr16	-	3178836	3182043	downstream	NM_001012632	IL32	interleukin-32 isoform B	2.16746	1.11601	2.16746	up	chr16	+	3115662	3119668
ENST00000446783	RP11-40H20.1	-2.85332	-1.51264	2.85332	down	Ensembl	640	chr1	-	27527324	27527964	upstream	NM_005281	GPR3	G-protein coupled receptor 3	-2.69463	-1.43009	2.69463	down	chr1	+	27719151	27722317
NR_027451	LOC647979	2.00702	1.00505	2.00702	up	RefSeq_NR	5378	chr20	-	34633541	34638882	upstream	NM_015511	C20orf4	hypothetical protein LOC25980	2.49396	1.31844	2.49396	up	chr20	+	34824446	34844853
AF191495	lincRNA-F11R	4.76494	2.25246	4.76494	up	lincRNA	2187	chr1	-	160967605	161008711	upstream	NM_004106	FCER1G	high affinity immunoglobulin epsilon receptor	3.29701	1.72116	3.29701	up	chr1	+	161185086	161189038
uc002qsa.2	LOC113386	-2.61186	-1.38508	2.61186	down	UCSC_knowngene	1396	chr19	+	58816739	58827011	upstream	NM_001164530	ZNF135	zinc finger protein 135 isoform 5	-2.42667	-1.27898	2.42667	down	chr19	+	58570606	58581110
AW812672	lincRNA-MCPH1-1	-2.17657	-1.12206	2.17657	down	lincRNA	449	chr8	-	6559168	6563761	downstream	NM_001172574	MCPH1	microcephalin isoform 2	-2.07269	-1.0515	2.07269	down	chr8	+	6264112	6304940
CD000492	lincRNA-WISP3-2	-3.22143	-1.6877	3.22143	down	lincRNA	304	chr6	+	112311747	112312016	downstream	NM_001105206	LAMA4	laminin subunit alpha-4 isoform 1 precursor	2.44598	1.29041	2.44598	up	chr6	-	112429133	112575828
AK095608		2.02917	1.02089	2.02917	up	NRED	2784	chrX	+	15719056	15721845	upstream	NM_020665	TMEM27	collectrin precursor	-5.55916	-2.47487	5.55916	down	chrX	-	15645440	15683154
ENST00000446783	RP11-40H20.1	-2.85332	-1.51264	2.85332	down	Ensembl	640	chr1	-	27527324	27527964	upstream	NM_004672	MAP3K6	mitogen-activated protein kinase kinase kinase	2.07375	1.05224	2.07375	up	chr1	-	27681669	27693337
AY927493		2.34973	1.2325	2.34973	up	misc_RNA	130	chr14	-	105281910	105282241	downstream	NM_001137601	ZBTB42	zinc finger and BTB domain-containing protein	2.26821	1.18155	2.26821	up	chr14	+	105266932	105271048
AF083120		-2.01739	-1.01249	2.01739	down	misc_RNA	158	chr11	+	62321164	62321291	upstream	NM_025080	ASRGL1	L-asparaginase	-2.25754	-1.17475	2.25754	down	chr11	+	62104773	62160887
uc002ilc.1	CR602880	3.54758	1.82684	3.54758	up	UCSC_knowngene	2080	chr17	-	45132466	45177627	downstream	NM_001012511	GOSR2	Golgi SNAP receptor complex member 2 isoform C	2.07066	1.05009	2.07066	up	chr17	+	45000485	45014205
uc010wkm.1	CR624169	2.37327	1.24688	2.37327	up	UCSC_knowngene	416	chr17	-	45128651	45129168	downstream	NM_001012511	GOSR2	Golgi SNAP receptor complex member 2 isoform C	2.07066	1.05009	2.07066	up	chr17	+	45000485	45014205
ENST00000421191	XXbac-BPG248L24.10	3.16652	1.6629	3.16652	up	Ensembl	306	chr6	-	31275591	31276326	upstream	NM_001011700	MCCD1	mitochondrial coiled-coil domain protein 1	-17.7706	-4.15142	17.7706	down	chr6	+	31496738	31498008
NR_026761	C1orf97	2.41158	1.26998	2.41158	up	RefSeq_NR	797	chr1	+	211556096	211605876	upstream	NM_001136225	RCOR3	REST corepressor 3 isoform c	2.48571	1.31366	2.48571	up	chr1	+	211432707	211486655
ENST00000421191	XXbac-BPG248L24.10	3.16652	1.6629	3.16652	up	Ensembl	306	chr6	-	31275591	31276326	upstream	NM_001177519	MICA	MHC class I polypeptide-related sequence A	2.78702	1.47872	2.78702	up	chr6	+	31371370	31383090
uc002cuc.2	BC013599	2.99968	1.58481	2.99968	up	UCSC_knowngene	1114	chr16	-	3178836	3182043	downstream	NM_032296	FLYWCH1	FLYWCH-type zinc finger-containing protein 1	2.83433	1.50301	2.83433	up	chr16	+	2961979	3001209
chr6:27248371-27266346-	lincRNA-PRSS16	-2.16786	-1.11627	2.16786	down	lincRNA	17976	chr6	-	27248371	27266346	downstream	NM_005865	PRSS16	thymus-specific serine protease precursor	2.86928	1.52069	2.86928	up	chr6	+	27215501	27224399
chr5:141438289-141445854+	lincRNA-NDFIP1	-2.27102	-1.18334	2.27102	down	lincRNA	7566	chr5	+	141438289	141445854	downstream	NM_030571	NDFIP1	NEDD4 family-interacting protein 1	-2.91222	-1.54212	2.91222	down	chr5	+	141488323	141534008
AF083120		-2.01739	-1.01249	2.01739	down	misc_RNA	158	chr11	+	62321164	62321291	upstream	NM_024060	AHNAK	neuroblast differentiation-associated protein	2.14765	1.10276	2.14765	up	chr11	-	62201015	62314332
ENST00000435260	AC046176.4	-3.22866	-1.69094	3.22866	down	Ensembl	1170	chr8	-	56962596	56963766	downstream	NM_152417	TMEM68	transmembrane protein 68	-2.57872	-1.36665	2.57872	down	chr8	-	56651319	56685885
AW086055	lincRNA-PRRC2C	3.09969	1.63213	3.09969	up	lincRNA	378	chr1	-	171562278	171562866	upstream	NM_014955	METTL13	methyltransferase-like protein 13 isoform 2	2.17735	1.12258	2.17735	up	chr1	+	171750760	171766856
EB388332	lincRNA-MYOC	4.16217	2.05734	4.16217	up	lincRNA	699	chr1	+	171561933	171562679	downstream	NM_014955	METTL13	methyltransferase-like protein 13 isoform 2	2.17735	1.12258	2.17735	up	chr1	+	171750760	171766856
AW269809	lincRNA-KPNA1	-2.65238	-1.40729	2.65238	down	lincRNA	382	chr3	-	122233924	122236198	upstream	NM_001146106	PARP9	poly [ADP-ribose] polymerase 9 isoform c	5.76012	2.5261	5.76012	up	chr3	-	122250619	122283194
chr17:55283426-55307276+	lincRNA-MSI2	-2.77548	-1.47274	2.77548	down	lincRNA	23851	chr17	+	55283426	55307276	upstream	NM_021626	SCPEP1	retinoid-inducible serine carboxypeptidase	-2.96467	-1.56787	2.96467	down	chr17	+	55055467	55084129
ENST00000440570	AC004383.4	2.02603	1.01866	2.02603	up	Ensembl	760	chrX	-	133677366	133680662	downstream	NM_001101357	CCDC160	coiled-coil domain-containing protein 160	-4.30719	-2.10675	4.30719	down	chrX	+	133371076	133379808
uc004exm.2	BC007360	3.00549	1.5876	3.00549	up	UCSC_knowngene	646	chrX	-	133678458	133680653	downstream	NM_001101357	CCDC160	coiled-coil domain-containing protein 160	-4.30719	-2.10675	4.30719	down	chrX	+	133371076	133379808
DA728743	lincRNA-FOXA1	-2.41526	-1.27218	2.41526	down	lincRNA	789	chr14	-	38503496	38663486	upstream	NM_175060	CLEC14A	C-type lectin domain family 14 member A	2.12434	1.08702	2.12434	up	chr14	-	38723318	38725574
uc001stu.2	BC035381	-2.38368	-1.25319	2.38368	down	UCSC_knowngene	3099	chr12	-	68102828	68123221	downstream	NM_006482	DYRK2	dual specificity	-2.44761	-1.29137	2.44761	down	chr12	+	68042511	68056444
AF083120		-2.01739	-1.01249	2.01739	down	misc_RNA	158	chr11	+	62321164	62321291	downstream	NM_001404	EEF1G	elongation factor 1-gamma	-2.30323	-1.20366	2.30323	down	chr11	-	62327072	62341460
AX747492	lincRNA-HFE2	3.39448	1.76319	3.39448	up	lincRNA	4510	chr1	+	145209144	146424095	overlap	NM_145277	HFE2	hemojuvelin isoform b	-2.05293	-1.03769	2.05293	down	chr1	+	145413190	145417545
uc002cuc.2	BC013599	2.99968	1.58481	2.99968	up	UCSC_knowngene	1114	chr16	-	3178836	3182043	downstream	NM_001012636	IL32	interleukin-32 isoform D	2.60928	1.38365	2.60928	up	chr16	+	3115784	3119668
AK021565		-2.22087	-1.15112	2.22087	down	RNAdb	1903	chr17	+	73599615	73601517	upstream	NM_004524	LLGL2	lethal(2) giant larvae protein homolog 2 isoform	-2.20196	-1.13879	2.20196	down	chr17	+	73521782	73571290
ENST00000421191	XXbac-BPG248L24.10	3.16652	1.6629	3.16652	up	Ensembl	306	chr6	-	31275591	31276326	upstream	NM_005514	HLA-B	major histocompatibility complex, class I, B	2.57855	1.36656	2.57855	up	chr6	-	31321648	31324989
exon95+	lincRNA-KNCN	-2.39692	-1.26118	2.39692	down	lincRNA	271	chr1	+	46997334	46997604	upstream	NM_003579	RAD54L	DNA repair and recombination protein RAD54-like	-5.82492	-2.54224	5.82492	down	chr1	+	46713366	46744145
CD000492	lincRNA-WISP3-2	-3.22143	-1.6877	3.22143	down	lincRNA	304	chr6	+	112311747	112312016	downstream	NM_001105208	LAMA4	laminin subunit alpha-4 isoform 3 precursor	18.15	4.1819	18.15	up	chr6	-	112574985	112575828
uc003vcj.1	CR591034	2.56719	1.36019	2.56719	up	UCSC_knowngene	2178	chr7	-	104622195	104624373	upstream	NM_018682	MLL5	histone-lysine N-methyltransferase MLL5	3.94717	1.98082	3.94717	up	chr7	+	104654636	104754532
uc001iuc.2	BC043365	2.23233	1.15855	2.23233	up	UCSC_knowngene	2078	chr10	-	28811613	28821460	upstream	NM_012342	BAMBI	BMP and activin membrane-bound inhibitor homolog	-2.82111	-1.49627	2.82111	down	chr10	+	28966423	28971868
chr1:29096302-29111760-	lincRNA-YTHDF2	-3.10441	-1.63432	3.10441	down	lincRNA	15459	chr1	-	29096302	29111760	downstream	NM_152304	RAB42	putative Ras-related protein Rab-42 isoform 2	3.50557	1.80965	3.50557	up	chr1	+	28918711	28921088
BC009210	lincRNA-KIAA1199	4.7089	2.23539	4.7089	up	lincRNA	2959	chr15	-	81239669	81282169	upstream	NM_022566	MESDC1	mesoderm development candidate 1	2.8074	1.48923	2.8074	up	chr15	+	81293294	81296345
BC009210	lincRNA-KIAA1199	4.7089	2.23539	4.7089	up	lincRNA	2959	chr15	-	81239669	81282169	overlap	NM_015154	MESDC2	LDLR chaperone MESD	2.0639	1.04537	2.0639	up	chr15	-	81268094	81282205
chr7:1348449-1366599+	lincRNA-MICALL2	-2.54477	-1.34754	2.54477	down	lincRNA	18151	chr7	+	1348449	1366599	downstream	NM_002360	MAFK	transcription factor MafK	2.39746	1.26151	2.39746	up	chr7	+	1570367	1582679
AK124977	lincRNA-UNKL-2	2.50674	1.32581	2.50674	up	lincRNA	2638	chr16	-	1413205	1464704	upstream	NM_144570	HN1L	hematological and neurological expressed 1-like	7.03737	2.81504	7.03737	up	chr16	+	1728277	1752073
uc003nih.2	BC033330	-2.52292	-1.3351	2.52292	down	UCSC_knowngene	2883	chr6	+	26569551	26574925	upstream	NM_001145008	BTN3A1	butyrophilin subfamily 3 member A1 isoform c	3.37165	1.75345	3.37165	up	chr6	+	26402464	26415444
chrX:118631438-118670334-	lincRNA-SLC25A5-2	-2.03708	-1.0265	2.03708	down	lincRNA	38897	chrX	-	118631438	118670334	upstream	NM_001105576	ANKRD58	ankyrin repeat domain-containing protein 58	10.095	3.33557	10.095	up	chrX	+	118892575	118894165
ENST00000504402	RP11-367J11.3	-3.90069	-1.96373	3.90069	down	Ensembl	292	chr4	-	7096297	7105056	downstream	NM_153376	CCDC96	coiled-coil domain-containing protein 96	2.36313	1.2407	2.36313	up	chr4	-	7042575	7044728
uc002cuc.2	BC013599	2.99968	1.58481	2.99968	up	UCSC_knowngene	1114	chr16	-	3178836	3182043	downstream	NM_001012634	IL32	interleukin-32 isoform C	2.71308	1.43993	2.71308	up	chr16	+	3115638	3119668
BG180467	lincRNA-POTED-1	-2.13902	-1.09695	2.13902	down	lincRNA	893	chr21	+	11139159	11139834	upstream	NM_199261	TPTE	putative tyrosine-protein phosphatase TPTE	3.81411	1.93135	3.81411	up	chr21	-	10906742	10990920
uc002the.2	LOC541471	11.1134	3.47423	11.1134	up	UCSC_knowngene	1583	chr2	-	111965358	112252692	downstream	NM_006538	BCL2L11	bcl-2-like protein 11 isoform 6	3.0974	1.63106	3.0974	up	chr2	+	111878490	111926022
ENST00000414621	AC006027.2	2.16919	1.11716	2.16919	up	Ensembl	230	chr7	+	30430523	30451991	upstream	NM_152793	C7orf41	hypothetical protein LOC222166	-4.17075	-2.06031	4.17075	down	chr7	+	30174551	30202381
AK124977	lincRNA-UNKL-2	2.50674	1.32581	2.50674	up	lincRNA	2638	chr16	-	1413205	1464704	upstream	NM_001114331	CLCN7	H(+)/Cl(-) exchange transporter 7 isoform b	-2.33686	-1.22457	2.33686	down	chr16	-	1494934	1525085
AK124977	lincRNA-UNKL-2	2.50674	1.32581	2.50674	up	lincRNA	2638	chr16	-	1413205	1464704	downstream	NM_003294	TPSAB1	tryptase alpha/beta-1 precursor	3.35565	1.74659	3.35565	up	chr16	+	1290677	1292555
ENST00000423122	RP11-65J3.1	-3.1311	-1.64667	3.1311	down	Ensembl	545	chr9	+	132104121	132121817	upstream	NM_203434	IER5L	immediate early response gene 5-like protein	3.21912	1.68667	3.21912	up	chr9	-	131937830	131940540
uc003tbd.2	BC041636	2.63367	1.39708	2.63367	up	UCSC_knowngene	1130	chr7	-	30555927	30601744	upstream	NM_002047	GARS	glycyl-tRNA synthetase	-2.09334	-1.06581	2.09334	down	chr7	+	30634180	30673648
ENST00000414621	AC006027.2	2.16919	1.11716	2.16919	up	Ensembl	230	chr7	+	30430523	30451991	downstream	NM_002047	GARS	glycyl-tRNA synthetase	-2.09334	-1.06581	2.09334	down	chr7	+	30634180	30673648
ENST00000421191	XXbac-BPG248L24.10	3.16652	1.6629	3.16652	up	Ensembl	306	chr6	-	31275591	31276326	upstream	NM_006674	HCP5	HLA class I histocompatibility antigen protein	3.0396	1.60388	3.0396	up	chr6	+	31430956	31433586
uc003tbd.2	BC041636	2.63367	1.39708	2.63367	up	UCSC_knowngene	1130	chr7	-	30555927	30601744	downstream	NM_147128	ZNRF2	E3 ubiquitin-protein ligase ZNRF2	-3.04493	-1.60641	3.04493	down	chr7	+	30323922	30407308
ENST00000414621	AC006027.2	2.16919	1.11716	2.16919	up	Ensembl	230	chr7	+	30430523	30451991	upstream	NM_147128	ZNRF2	E3 ubiquitin-protein ligase ZNRF2	-3.04493	-1.60641	3.04493	down	chr7	+	30323922	30407308
AW812672	lincRNA-MCPH1-1	-2.17657	-1.12206	2.17657	down	lincRNA	449	chr8	-	6559168	6563761	upstream	NM_005218	DEFB1	beta-defensin 1 preproprotein	-8.45508	-3.07982	8.45508	down	chr8	-	6728096	6735529
BI048312	lincRNA-WNT9A	3.19873	1.6775	3.19873	up	lincRNA	393	chr1	+	227598421	228286740	downstream	NM_052843	OBSCN	obscurin isoform a	4.62676	2.21	4.62676	up	chr1	+	228395860	228548951
CD000492	lincRNA-WISP3-2	-3.22143	-1.6877	3.22143	down	lincRNA	304	chr6	+	112311747	112312016	downstream	NM_001105209	LAMA4	laminin subunit alpha-4 isoform 3 precursor	5.17237	2.37083	5.17237	up	chr6	-	112574985	112575828
uc002cuc.2	BC013599	2.99968	1.58481	2.99968	up	UCSC_knowngene	1114	chr16	-	3178836	3182043	downstream	NM_001142350	THOC6	THO complex subunit 6 homolog isoform 2	2.65124	1.40667	2.65124	up	chr16	+	3074031	3077756

## Sheet: 109T vs 109N
# Condition pairs: 109T vs 109N # Fold Change cut-off: 2.0 This table contains the differentially expressed lincRNA and nearby coding gene pairs (distance < 300 kb). # Column A: seqname, the sequence identifier. # Column B: GeneSymbol, the symbol of the LncRNA. # Column C: Fold change - LncRNAs, the ratio of normalized intensities between two samples, positive value indicates up-regulation, and n…
seqname	GeneSymbol	Fold change - LncRNAs	Log Fold change - LncRNAs	Absolute Fold change - LncRNAs	Regulation - LncRNAs	source	RNAlength	Chrom	Strand	txStart	txEnd	GenomeRelationship	NearbyGene	NearbyGeneSymbol	NearbyProteinName	Fold change - mRNAs	Log Fold change - mRNAs	Absolute Fold change - mRNAs	Regulation - mRNAs	NearbyGeneChrom	NearbyGeneStrand	NearbyGenetxStart	NearbyGenetxEnd
NR_026857	FLJ90757	-2.08864	-1.06257	2.08864	down	RefSeq_NR	4421	chr17	-	79002932	79008519	upstream	NM_017450	BAIAP2	brain-specific angiogenesis inhibitor	-2.27963	-1.1888	2.27963	down	chr17	+	79008946	79084312
uc002cuc.2	BC013599	3.41036	1.76992	3.41036	up	UCSC_knowngene	1114	chr16	-	3178836	3182043	downstream	NM_001012633	IL32	interleukin-32 isoform A	3.3911	1.76175	3.3911	up	chr16	+	3115312	3119668
AA368654	lincRNA-OPTC	-3.65845	-1.87123	3.65845	down	lincRNA	281	chr1	-	203482904	203483185	downstream	NM_002725	PRELP	prolargin precursor	-5.47066	-2.45172	5.47066	down	chr1	+	203444882	203460479
AK124321	lincRNA-RNF32-3	-2.46096	-1.29922	2.46096	down	lincRNA	2538	chr7	+	155755325	155759037	upstream	NM_000193	SHH	sonic hedgehog protein preproprotein	-3.13782	-1.64976	3.13782	down	chr7	-	155595557	155604967
AK296158	lincRNA-TMEM30B-1	2.86623	1.51915	2.86623	up	lincRNA	1756	chr14	+	61654286	62016579	downstream	NM_003082	SNAPC1	snRNA-activating protein complex subunit 1	2.04314	1.03079	2.04314	up	chr14	+	62229074	62263146
AL832122		2.13107	1.09158	2.13107	up	misc_RNA	5572	chr1	-	23607802	23613245	downstream	NM_001142546	LUZP1	leucine zipper protein 1	-2.10824	-1.07604	2.10824	down	chr1	-	23410515	23495351
AL832122		2.13107	1.09158	2.13107	up	misc_RNA	5572	chr1	-	23607802	23613245	upstream	NM_003196	TCEA3	transcription elongation factor A protein 3	2.31882	1.21339	2.31882	up	chr1	-	23707554	23751261
ENST00000428947	AP001187.11	-2.08816	-1.06224	2.08816	down	Ensembl	411	chr11	+	64649006	64649417	downstream	NM_138456	BATF2	basic leucine zipper transcriptional factor	2.85741	1.51471	2.85741	up	chr11	-	64755416	64764517
chr10:74002486-74020610+	lincRNA-DDIT4-1	-2.03826	-1.02734	2.03826	down	lincRNA	18125	chr10	+	74002486	74020610	downstream	NM_019058	DDIT4	DNA damage-inducible transcript 4 protein	6.54105	2.70952	6.54105	up	chr10	+	74033676	74035797
uc003nih.2	BC033330	-2.27606	-1.18654	2.27606	down	UCSC_knowngene	2883	chr6	+	26569551	26574925	upstream	NM_007048	BTN3A1	butyrophilin subfamily 3 member A1 isoform a	2.20498	1.14077	2.20498	up	chr6	+	26402464	26415444
ENST00000421191	XXbac-BPG248L24.10	7.83513	2.96996	7.83513	up	Ensembl	306	chr6	-	31275591	31276326	upstream	NM_001166538	LST1	leukocyte-specific transcript 1 protein isoform	5.62826	2.49269	5.62826	up	chr6	+	31554976	31556686
uc003nih.2	BC033330	-2.27606	-1.18654	2.27606	down	UCSC_knowngene	2883	chr6	+	26569551	26574925	upstream	NM_007047	BTN3A2	butyrophilin subfamily 3 member A2 isoform a	6.35621	2.66817	6.35621	up	chr6	+	26365397	26378548
ENST00000441380	IFITM4P	2.13542	1.09452	2.13542	up	Ensembl	420	chr6	-	29718505	29718925	downstream	NM_001098479	HLA-F	HLA class I histocompatibility antigen, alpha	5.45159	2.44668	5.45159	up	chr6	+	29691116	29695073
ENST00000441380	IFITM4P	2.13542	1.09452	2.13542	up	Ensembl	420	chr6	-	29718505	29718925	downstream	NM_018950	HLA-F	HLA class I histocompatibility antigen, alpha	8.53677	3.09369	8.53677	up	chr6	+	29691116	29694303
uc003nih.2	BC033330	-2.27606	-1.18654	2.27606	down	UCSC_knowngene	2883	chr6	+	26569551	26574925	upstream	NM_001145009	BTN3A1	butyrophilin subfamily 3 member A1 isoform d	6.63292	2.72964	6.63292	up	chr6	+	26402464	26415444
uc003oci.1	AK057104	2.08204	1.058	2.08204	up	UCSC_knowngene	3143	chr6	+	32862499	32871535	downstream	NM_033554	HLA-DPA1	HLA class II histocompatibility antigen, DP	7.98813	2.99786	7.98813	up	chr6	-	33032793	33041378
uc002cuc.2	BC013599	3.41036	1.76992	3.41036	up	UCSC_knowngene	1114	chr16	-	3178836	3182043	downstream	NM_152341	PAQR4	progestin and adipoQ receptor family member 4	8.93561	3.15957	8.93561	up	chr16	+	3019341	3023485
chr1:181081092-181121244+	lincRNA-CACNA1E-3	-3.24487	-1.69816	3.24487	down	lincRNA	40153	chr1	+	181081092	181121244	upstream	NM_004736	XPR1	xenotropic and polytropic retrovirus receptor 1	-2.07539	-1.05338	2.07539	down	chr1	+	180601145	180859415
ENST00000433054	RP11-1O7.1	2.38605	1.25462	2.38605	up	Ensembl	884	chr2	+	174162356	174163240	upstream	NM_133646	ZAK	mitogen-activated protein kinase kinase kinase	2.83575	1.50373	2.83575	up	chr2	+	173940564	174091873
BF108976	lincRNA-MYO1B-4	-2.11279	-1.07915	2.11279	down	lincRNA	509	chr2	+	192068946	192069452	upstream	NM_007315	STAT1	signal transducer and activator of transcription	3.45993	1.79074	3.45993	up	chr2	-	191833761	191878976
AJ227862		5.47871	2.45384	5.47871	up	misc_RNA	457	chr5	+	102118475	102118934	downstream	NM_000919	PAM	peptidyl-glycine alpha-amidating monooxygenase	2.25127	1.17074	2.25127	up	chr5	+	102201526	102366808
AW086055	lincRNA-PRRC2C	2.7321	1.45001	2.7321	up	lincRNA	378	chr1	-	171562278	171562866	downstream	NM_002022	FMO4	dimethylaniline monooxygenase [N-oxide-forming]	-4.452	-2.15445	4.452	down	chr1	+	171283485	171311223
AA368654	lincRNA-OPTC	-3.65845	-1.87123	3.65845	down	lincRNA	281	chr1	-	203482904	203483185	downstream	NM_006763	BTG2	protein BTG2	-7.94593	-2.99022	7.94593	down	chr1	+	203274663	203278729
AY927493		2.18158	1.12537	2.18158	up	misc_RNA	130	chr14	-	105281910	105282241	upstream	NM_017955	CDCA4	cell division cycle-associated protein 4	2.82297	1.49721	2.82297	up	chr14	-	105475909	105487425
AY927493		2.18158	1.12537	2.18158	up	misc_RNA	130	chr14	-	105281910	105282241	downstream	NM_022489	INF2	inverted formin-2 isoform 1	2.57823	1.36638	2.57823	up	chr14	+	105155942	105185947
AJ227862		5.47871	2.45384	5.47871	up	misc_RNA	457	chr5	+	102118475	102118934	downstream	NM_138822	PAM	peptidyl-glycine alpha-amidating monooxygenase	2.4222	1.27632	2.4222	up	chr5	+	102201526	102366808
uc002nwh.1	DQ593116	-2.17824	-1.12316	2.17824	down	UCSC_knowngene	118	chr19	-	35306610	35306728	downstream	NM_001012320	ZNF302	zinc finger protein 302	2.00007	1.00005	2.00007	up	chr19	+	35168566	35177302
DA430048	lincRNA-PLXNA2-1	-2.37692	-1.2491	2.37692	down	lincRNA	563	chr1	+	208132362	208139352	upstream	NM_001025109	CD34	hematopoietic progenitor cell antigen CD34	2.23735	1.16179	2.23735	up	chr1	-	208059882	208084683
AK091805		2.27665	1.18691	2.27665	up	misc_RNA	2929	chr2	-	10702420	10706491	upstream	NM_144583	ATP6V1C2	V-type proton ATPase subunit C 2 isoform b	-2.4272	-1.27929	2.4272	down	chr2	+	10861774	10925236
N80091	lincRNA-SPATA8-3	-2.40309	-1.26489	2.40309	down	lincRNA	436	chr15	+	96886179	96888182	upstream	NM_001145157	NR2F2	COUP transcription factor 2 isoform c	-2.04609	-1.03287	2.04609	down	chr15	+	96876568	96883492
BG210085	lincRNA-PBX1-1	3.07905	1.62249	3.07905	up	lincRNA	282	chr1	+	163369198	163369747	upstream	NM_003617	RGS5	regulator of G-protein signaling 5 isoform 1	23.8228	4.57427	23.8228	up	chr1	-	163112088	163172963
uc002cuc.2	BC013599	3.41036	1.76992	3.41036	up	UCSC_knowngene	1114	chr16	-	3178836	3182043	downstream	NM_001042428	ZNF205	zinc finger protein 205	-2.33172	-1.22139	2.33172	down	chr16	+	3162562	3170518
AA854104	lincRNA-MTCH2	2.94001	1.55582	2.94001	up	lincRNA	547	chr11	+	47626129	47626679	upstream	NM_002804	PSMC3	26S protease regulatory subunit 6A	3.56285	1.83303	3.56285	up	chr11	-	47440319	47448024
uc002cuc.2	BC013599	3.41036	1.76992	3.41036	up	UCSC_knowngene	1114	chr16	-	3178836	3182043	downstream	NM_001012635	IL32	interleukin-32 isoform C	3.84557	1.9432	3.84557	up	chr16	+	3115611	3119668
ENST00000432358	RP11-732M18.3	-2.82212	-1.49678	2.82212	down	Ensembl	424	chr6	+	158703294	158733390	upstream	NM_032861	SERAC1	protein SERAC1	-2.88213	-1.52713	2.88213	down	chr6	-	158530535	158589312
NR_027345	NCRNA00173	4.90021	2.29284	4.90021	up	RefSeq_NR	1597	chr12	+	116971226	116973326	downstream	NM_024738	C12orf49	hypothetical protein LOC79794 precursor	2.33806	1.22531	2.33806	up	chr12	-	117153595	117175843
AK021484	lincRNA-SYNPO2	2.97118	1.57104	2.97118	up	lincRNA	3422	chr4	+	119672345	119956974	overlap	NM_001128933	SYNPO2	synaptopodin-2 isoform b	3.19461	1.67564	3.19461	up	chr4	+	119809995	119959669
uc003nih.2	BC033330	-2.27606	-1.18654	2.27606	down	UCSC_knowngene	2883	chr6	+	26569551	26574925	upstream	NM_006353	HMGN4	high mobility group nucleosome-binding	2.02197	1.01576	2.02197	up	chr6	+	26538571	26547164
chr5:172618919-172633619+	lincRNA-NKX2-5-1	-2.83013	-1.50087	2.83013	down	lincRNA	14701	chr5	+	172618919	172633619	upstream	NM_001031711	ERGIC1	endoplasmic reticulum-Golgi intermediate	2.06326	1.04492	2.06326	up	chr5	+	172261222	172379688
ENST00000441380	IFITM4P	2.13542	1.09452	2.13542	up	Ensembl	420	chr6	-	29718505	29718925	downstream	NM_001098478	HLA-F	HLA class I histocompatibility antigen, alpha	4.45637	2.15587	4.45637	up	chr6	+	29691116	29694303
exon95+	lincRNA-KNCN	-2.73602	-1.45208	2.73602	down	lincRNA	271	chr1	+	46997334	46997604	upstream	NM_001441	FAAH	fatty-acid amide hydrolase 1	-2.89276	-1.53245	2.89276	down	chr1	+	46859938	46879520
ENST00000421191	XXbac-BPG248L24.10	7.83513	2.96996	7.83513	up	Ensembl	306	chr6	-	31275591	31276326	upstream	NM_205840	LST1	leukocyte-specific transcript 1 protein isoform	5.79381	2.53451	5.79381	up	chr6	+	31554976	31556686
ENST00000470614	RP11-69M1.1	2.3454	1.22984	2.3454	up	Ensembl	315	chr12	-	8147365	8147680	upstream	NM_004054	C3AR1	C3a anaphylatoxin chemotactic receptor	3.25516	1.70273	3.25516	up	chr12	-	8210918	8218955
ENST00000441380	IFITM4P	2.13542	1.09452	2.13542	up	Ensembl	420	chr6	-	29718505	29718925	upstream	NM_002116	HLA-A	HLA class I histocompatibility antigen, A-1	5.51168	2.46249	5.51168	up	chr6	+	29910308	29913661
exon95+	lincRNA-KNCN	-2.73602	-1.45208	2.73602	down	lincRNA	271	chr1	+	46997334	46997604	upstream	NM_006004	UQCRH	cytochrome b-c1 complex subunit 6,	-2.30017	-1.20174	2.30017	down	chr1	+	46769379	46782447
uc003oci.1	AK057104	2.08204	1.058	2.08204	up	UCSC_knowngene	3143	chr6	+	32862499	32871535	downstream	NM_002121	HLA-DPB1	HLA class II histocompatibility antigen, DP beta	3.95923	1.98522	3.95923	up	chr6	+	33043759	33054976
BX953928	lincRNA-DOK2	-3.85044	-1.94502	3.85044	down	lincRNA	442	chr8	+	21714378	21714822	downstream	NM_003974	DOK2	docking protein 2	7.87369	2.97704	7.87369	up	chr8	-	21766383	21771205
chr4:120932275-120933293+	lincRNA-MAD2L1-1	-2.00882	-1.00635	2.00882	down	lincRNA	1019	chr4	+	120932275	120933293	downstream	NM_002358	MAD2L1	mitotic spindle assembly checkpoint protein	3.93199	1.97526	3.93199	up	chr4	-	120980578	120988013
uc002cuc.2	BC013599	3.41036	1.76992	3.41036	up	UCSC_knowngene	1114	chr16	-	3178836	3182043	downstream	NM_001012718	IL32	interleukin-32 isoform B	2.16939	1.11729	2.16939	up	chr16	+	3115312	3119668
AA972029	lincRNA-MPDZ-1	-2.46764	-1.30313	2.46764	down	lincRNA	419	chr9	+	12958862	12959235	upstream	NM_000550	TYRP1	5,6-dihydroxyindole-2-carboxylic acid oxidase	-2.02428	-1.01741	2.02428	down	chr9	+	12693385	12710266
uc002cuc.2	BC013599	3.41036	1.76992	3.41036	up	UCSC_knowngene	1114	chr16	-	3178836	3182043	downstream	NM_001002017	HCFC1R1	host cell factor C1 regulator 1 isoform 2	2.69201	1.42869	2.69201	up	chr16	-	3072625	3074287
BX953928	lincRNA-DOK2	-3.85044	-1.94502	3.85044	down	lincRNA	442	chr8	+	21714378	21714822	downstream	NM_024815	NUDT18	nucleoside diphosphate-linked moiety X motif 18	2.52086	1.33392	2.52086	up	chr8	-	21964382	21966932
chr7:1348449-1366599+	lincRNA-MICALL2	-2.4353	-1.2841	2.4353	down	lincRNA	18151	chr7	+	1348449	1366599	upstream	NM_138445	GPR146	probable G-protein coupled receptor 146	2.1835	1.12664	2.1835	up	chr7	+	1097140	1098897
AK131566	lincRNA-NR4A1	-12.9535	-3.69527	12.9535	down	lincRNA	3513	chr12	+	52431498	52453285	downstream	NM_005556	KRT7	keratin, type II cytoskeletal 7	-3.42885	-1.77772	3.42885	down	chr12	+	52626953	52642709
AK293821	lincRNA-SYNCRIP-2	-2.30161	-1.20264	2.30161	down	lincRNA	1499	chr6	+	86303006	86304505	upstream	NM_002526	NT5E	5'-nucleotidase isoform 1 preproprotein	-2.84921	-1.51056	2.84921	down	chr6	+	86159301	86205509
DA330754	lincRNA-TMSB10	-2.09046	-1.06382	2.09046	down	lincRNA	558	chr2	-	85191205	85192095	downstream	NM_021103	TMSB10	thymosin beta-10	3.6677	1.87488	3.6677	up	chr2	+	85132762	85133799
AA164863	lincRNA-TMEM9	-2.44206	-1.2881	2.44206	down	lincRNA	472	chr1	-	201142621	201143091	downstream	NM_017596	KIF21B	kinesin-like protein KIF21B	5.79522	2.53486	5.79522	up	chr1	-	200938519	200992828
ENST00000421191	XXbac-BPG248L24.10	7.83513	2.96996	7.83513	up	Ensembl	306	chr6	-	31275591	31276326	downstream	NM_014068	PSORS1C1	psoriasis susceptibility 1 candidate 1	2.32877	1.21957	2.32877	up	chr6	+	31082607	31107869
ENST00000428947	AP001187.11	-2.08816	-1.06224	2.08816	down	Ensembl	411	chr11	+	64649006	64649417	downstream	NM_003273	TM7SF2	delta(14)-sterol reductase	-3.41452	-1.77168	3.41452	down	chr11	+	64879340	64883707
uc002cuc.2	BC013599	3.41036	1.76992	3.41036	up	UCSC_knowngene	1114	chr16	-	3178836	3182043	downstream	NM_020982	CLDN9	claudin-9	-5.45468	-2.4475	5.45468	down	chr16	+	3062456	3064506
CB857271	lincRNA-DLK1-1	-2.64195	-1.4016	2.64195	down	lincRNA	349	chr14	-	101257085	101257400	downstream	NM_003836	DLK1	protein delta homolog 1 precursor	-3.34083	-1.74021	3.34083	down	chr14	+	101193201	101201467
AL049252		-3.10131	-1.63288	3.10131	down	NRED	3343	chr6	-	30268570	30271892	downstream	NM_033229	TRIM15	tripartite motif-containing protein 15	2.30785	1.20655	2.30785	up	chr6	+	30130982	30140473
BF328678	lincRNA-ST14	-2.92872	-1.55027	2.92872	down	lincRNA	259	chr11	-	130089127	130089307	upstream	NM_139055	ADAMTS15	A disintegrin and metalloproteinase with	-2.88216	-1.52715	2.88216	down	chr11	+	130318868	130346539
AW167909	lincRNA-WRNIP1	-2.99461	-1.58237	2.99461	down	lincRNA	518	chr6	-	2812462	2812980	upstream	NM_000904	NQO2	ribosyldihydronicotinamide dehydrogenase	-3.04844	-1.60807	3.04844	down	chr6	+	3000066	3019994
BC002759	lincRNA-SLC48A1	-2.2691	-1.18212	2.2691	down	lincRNA	1041	chr12	+	48165369	48176533	overlap	NM_017842	SLC48A1	heme transporter HRG1	-2.32847	-1.21938	2.32847	down	chr12	+	48166966	48176536
AK299029	lincRNA-RAPGEF3	-3.79282	-1.92327	3.79282	down	lincRNA	2776	chr12	-	48131323	48164823	upstream	NM_017842	SLC48A1	heme transporter HRG1	-2.32847	-1.21938	2.32847	down	chr12	+	48166966	48176536
AB002362	lincRNA-IGSF1	-2.46868	-1.30374	2.46868	down	lincRNA	5413	chrX	-	130407484	130712873	overlap	NM_001004486	OR13H1	olfactory receptor 13H1	-2.3959	-1.26057	2.3959	down	chrX	+	130678047	130678974
ENST00000442418	RP11-86H7.1	-2.57817	-1.36635	2.57817	down	Ensembl	748	chr1	-	95104016	95285652	upstream	NM_152487	TMEM56	transmembrane protein 56	-2.70076	-1.43336	2.70076	down	chr1	+	95582893	95663161
chr1:95438681-95440571-	lincRNA-CNN3	-3.28622	-1.71643	3.28622	down	lincRNA	1891	chr1	-	95438681	95440571	upstream	NM_152487	TMEM56	transmembrane protein 56	-2.70076	-1.43336	2.70076	down	chr1	+	95582893	95663161
uc003nih.2	BC033330	-2.27606	-1.18654	2.27606	down	UCSC_knowngene	2883	chr6	+	26569551	26574925	upstream	NM_003543	HIST1H4H	histone H4	2.8623	1.51718	2.8623	up	chr6	-	26285353	26285727
AK096174		4.90528	2.29434	4.90528	up	misc_RNA	2220	chr12	+	122232715	122234935	downstream	NM_001024808	BCL7A	B-cell CLL/lymphoma 7 protein family member A	-2.69562	-1.43062	2.69562	down	chr12	+	122459860	122499950
BC026095		-2.21419	-1.14678	2.21419	down	misc_RNA	2212	chr11	+	59323030	59325212	upstream	NM_001004708	OR4D6	olfactory receptor 4D6	-2.4318	-1.28202	2.4318	down	chr11	+	59224433	59225378
chr5:170992545-171005495+	lincRNA-FBXW11-1	2.88529	1.52872	2.88529	up	lincRNA	12951	chr5	+	170992545	171005495	upstream	NM_001037738	NPM1	nucleophosmin isoform 3	2.08921	1.06296	2.08921	up	chr5	+	170814707	170833731
uc002cuc.2	BC013599	3.41036	1.76992	3.41036	up	UCSC_knowngene	1114	chr16	-	3178836	3182043	downstream	NM_001012632	IL32	interleukin-32 isoform B	4.48173	2.16405	4.48173	up	chr16	+	3115662	3119668
AY927493		2.18158	1.12537	2.18158	up	misc_RNA	130	chr14	-	105281910	105282241	downstream	NM_021709	SIVA1	apoptosis regulatory protein Siva isoform 2	2.21632	1.14816	2.21632	up	chr14	+	105219469	105225996
chr5:170992545-171005495+	lincRNA-FBXW11-1	2.88529	1.52872	2.88529	up	lincRNA	12951	chr5	+	170992545	171005495	upstream	NM_199185	NPM1	nucleophosmin isoform 2	2.45432	1.29532	2.45432	up	chr5	+	170814707	170837888
AK304777	lincRNA-FBLN2-2	4.02948	2.0106	4.02948	up	lincRNA	3873	chr3	+	13573823	13679512	downstream	NM_004625	WNT7A	protein Wnt-7a precursor	-2.10911	-1.07663	2.10911	down	chr3	-	13860081	13921618
CD000492	lincRNA-WISP3-2	-3.924	-1.97233	3.924	down	lincRNA	304	chr6	+	112311747	112312016	downstream	NM_001105206	LAMA4	laminin subunit alpha-4 isoform 1 precursor	4.02873	2.01032	4.02873	up	chr6	-	112429133	112575828
AY927493		2.18158	1.12537	2.18158	up	misc_RNA	130	chr14	-	105281910	105282241	downstream	NM_001137601	ZBTB42	zinc finger and BTB domain-containing protein	2.38161	1.25194	2.38161	up	chr14	+	105266932	105271048
ENST00000421191	XXbac-BPG248L24.10	7.83513	2.96996	7.83513	up	Ensembl	306	chr6	-	31275591	31276326	upstream	NM_001011700	MCCD1	mitochondrial coiled-coil domain protein 1	-88.0386	-6.46007	88.0386	down	chr6	+	31496738	31498008
ENST00000421191	XXbac-BPG248L24.10	7.83513	2.96996	7.83513	up	Ensembl	306	chr6	-	31275591	31276326	upstream	NM_001177519	MICA	MHC class I polypeptide-related sequence A	2.02873	1.02058	2.02873	up	chr6	+	31371370	31383090
chr6:27248371-27266346-	lincRNA-PRSS16	3.52149	1.81619	3.52149	up	lincRNA	17976	chr6	-	27248371	27266346	downstream	NM_005865	PRSS16	thymus-specific serine protease precursor	2.88855	1.53034	2.88855	up	chr6	+	27215501	27224399
AF083120		-2.86988	-1.52099	2.86988	down	misc_RNA	158	chr11	+	62321164	62321291	upstream	NM_024060	AHNAK	neuroblast differentiation-associated protein	4.3506	2.12121	4.3506	up	chr11	-	62201015	62314332
AW075897	lincRNA-SIN3A	-2.11534	-1.08089	2.11534	down	lincRNA	521	chr15	-	75750735	75751256	downstream	NM_015492	C15orf39	hypothetical protein LOC56905	3.72334	1.8966	3.72334	up	chr15	+	75494220	75504510
uc003oci.1	AK057104	2.08204	1.058	2.08204	up	UCSC_knowngene	3143	chr6	+	32862499	32871535	upstream	NM_002122	HLA-DQA1	HLA class II histocompatibility antigen, DQ	3.09724	1.63098	3.09724	up	chr6	+	32605182	32611429
ENST00000515084	AC007333.1	-3.25531	-1.7028	3.25531	down	Ensembl	1972	chr16	+	52305527	52314201	downstream	NM_001080430	TOX3	TOX high mobility group box family member 3	-4.25725	-2.08992	4.25725	down	chr16	-	52471917	52580806
DA728743	lincRNA-FOXA1	-2.21029	-1.14424	2.21029	down	lincRNA	789	chr14	-	38503496	38663486	upstream	NM_175060	CLEC14A	C-type lectin domain family 14 member A	7.0495	2.81752	7.0495	up	chr14	-	38723318	38725574
Y00062	lincRNA-ATP6V1G3-2	5.98881	2.58227	5.98881	up	lincRNA	4597	chr1	+	198284952	198726330	overlap	NM_080921	PTPRC	receptor-type tyrosine-protein phosphatase C	-2.11036	-1.07749	2.11036	down	chr1	+	198608136	198726545
uc003oci.1	AK057104	2.08204	1.058	2.08204	up	UCSC_knowngene	3143	chr6	+	32862499	32871535	upstream	NM_002800	PSMB9	proteasome subunit beta type-9 proprotein	9.91145	3.3091	9.91145	up	chr6	+	32821937	32827628
BM676747	lincRNA-DCT	-3.00834	-1.58897	3.00834	down	lincRNA	348	chr13	-	95166133	95166457	downstream	NM_005708	GPC6	glypican-6 precursor	3.6232	1.85727	3.6232	up	chr13	+	93879077	95060273
AY927493		2.18158	1.12537	2.18158	up	misc_RNA	130	chr14	-	105281910	105282241	downstream	NM_001031714	INF2	inverted formin-2 isoform 2	2.72853	1.44812	2.72853	up	chr14	+	105155942	105185947
uc002cuc.2	BC013599	3.41036	1.76992	3.41036	up	UCSC_knowngene	1114	chr16	-	3178836	3182043	downstream	NM_001012636	IL32	interleukin-32 isoform D	4.02149	2.00773	4.02149	up	chr16	+	3115784	3119668
ENST00000421191	XXbac-BPG248L24.10	7.83513	2.96996	7.83513	up	Ensembl	306	chr6	-	31275591	31276326	upstream	NM_005514	HLA-B	major histocompatibility complex, class I, B	2.78398	1.47715	2.78398	up	chr6	-	31321648	31324989
exon95+	lincRNA-KNCN	-2.73602	-1.45208	2.73602	down	lincRNA	271	chr1	+	46997334	46997604	upstream	NM_003579	RAD54L	DNA repair and recombination protein RAD54-like	-5.35582	-2.42111	5.35582	down	chr1	+	46713366	46744145
CD000492	lincRNA-WISP3-2	-3.924	-1.97233	3.924	down	lincRNA	304	chr6	+	112311747	112312016	downstream	NM_001105208	LAMA4	laminin subunit alpha-4 isoform 3 precursor	5.42082	2.43851	5.42082	up	chr6	-	112574985	112575828
AL049252		-3.10131	-1.63288	3.10131	down	NRED	3343	chr6	-	30268570	30271892	downstream	NM_014596	ZNRD1	DNA-directed RNA polymerase I subunit RPA12	2.08466	1.05981	2.08466	up	chr6	+	30029035	30032686
AK096174		4.90528	2.29434	4.90528	up	misc_RNA	2220	chr12	+	122232715	122234935	downstream	NM_144668	WDR66	WD repeat-containing protein 66 isoform 1	2.15501	1.10769	2.15501	up	chr12	+	122356479	122441832
uc003oci.1	AK057104	2.08204	1.058	2.08204	up	UCSC_knowngene	3143	chr6	+	32862499	32871535	downstream	NM_006120	HLA-DMA	HLA class II histocompatibility antigen, DM	5.04557	2.33502	5.04557	up	chr6	-	32916390	32920899
uc003nih.2	BC033330	-2.27606	-1.18654	2.27606	down	UCSC_knowngene	2883	chr6	+	26569551	26574925	upstream	NM_001145008	BTN3A1	butyrophilin subfamily 3 member A1 isoform c	4.80937	2.26585	4.80937	up	chr6	+	26402464	26415444
AK021484	lincRNA-SYNPO2	2.97118	1.57104	2.97118	up	lincRNA	3422	chr4	+	119672345	119956974	overlap	NM_133477	SYNPO2	synaptopodin-2 isoform a	2.14645	1.10195	2.14645	up	chr4	+	119809995	119982402
ENST00000515403	RP11-844P9.2	2.58026	1.36752	2.58026	up	Ensembl	3632	chr5	-	175570087	175612158	upstream	NM_138820	HIGD2A	HIG1 domain family member 2A	2.03873	1.02767	2.03873	up	chr5	+	175815783	175816751
AJ227862		5.47871	2.45384	5.47871	up	misc_RNA	457	chr5	+	102118475	102118934	downstream	NM_138766	PAM	peptidyl-glycine alpha-amidating monooxygenase	2.39012	1.25708	2.39012	up	chr5	+	102201526	102366808
uc002cuc.2	BC013599	3.41036	1.76992	3.41036	up	UCSC_knowngene	1114	chr16	-	3178836	3182043	downstream	NM_001012634	IL32	interleukin-32 isoform C	4.59139	2.19893	4.59139	up	chr16	+	3115638	3119668
AY927493		2.18158	1.12537	2.18158	up	misc_RNA	130	chr14	-	105281910	105282241	downstream	NM_006427	SIVA1	apoptosis regulatory protein Siva isoform 1	2.35081	1.23316	2.35081	up	chr14	+	105219469	105225996
ENST00000230113	RP4-763G1.2	-2.13102	-1.09155	2.13102	down	Ensembl	408	chr1	+	67995312	67998012	downstream	NM_018841	GNG12	guanine nucleotide-binding protein	-2.10976	-1.07708	2.10976	down	chr1	-	68167148	68299155
chr7:127179214-127190764+	lincRNA-GCC1	2.19142	1.13187	2.19142	up	lincRNA	11551	chr7	+	127179214	127190764	downstream	NM_006193	PAX4	paired box protein Pax-4	-2.64603	-1.40383	2.64603	down	chr7	-	127250345	127255780
BF108976	lincRNA-MYO1B-4	-2.11279	-1.07915	2.11279	down	lincRNA	509	chr2	+	192068946	192069452	upstream	NM_139266	STAT1	signal transducer and activator of transcription	5.06588	2.34081	5.06588	up	chr2	-	191840262	191878976
AY927493		2.18158	1.12537	2.18158	up	misc_RNA	130	chr14	-	105281910	105282241	downstream	NM_001008404	C14orf180	transmembrane protein C14orf180	4.50934	2.17292	4.50934	up	chr14	+	105046055	105056183
uc004bxu.2	BC094873	-2.95529	-1.5633	2.95529	down	UCSC_knowngene	1213	chr9	+	132105694	132106907	upstream	NM_203434	IER5L	immediate early response gene 5-like protein	2.37229	1.24628	2.37229	up	chr9	-	131937830	131940540
AK297025	lincRNA-FGD4	-2.21985	-1.15046	2.21985	down	lincRNA	2924	chr12	+	32638905	32793673	upstream	NM_001003398	BICD1	protein bicaudal D homolog 1 isoform 2	2.98899	1.57966	2.98899	up	chr12	+	32260184	32531141
ENST00000421191	XXbac-BPG248L24.10	7.83513	2.96996	7.83513	up	Ensembl	306	chr6	-	31275591	31276326	upstream	NM_006674	HCP5	HLA class I histocompatibility antigen protein	4.64765	2.2165	4.64765	up	chr6	+	31430956	31433586
ENST00000470614	RP11-69M1.1	2.3454	1.22984	2.3454	up	Ensembl	315	chr12	-	8147365	8147680	upstream	NM_018088	FAM90A1	hypothetical protein LOC55138	2.05973	1.04245	2.05973	up	chr12	-	8373855	8380214
CD000492	lincRNA-WISP3-2	-3.924	-1.97233	3.924	down	lincRNA	304	chr6	+	112311747	112312016	downstream	NM_001105209	LAMA4	laminin subunit alpha-4 isoform 3 precursor	2.1617	1.11217	2.1617	up	chr6	-	112574985	112575828

## Sheet: 110T vs 110N
# Condition pairs: 110T vs 110N # Fold Change cut-off: 2.0 This table contains the differentially expressed lincRNA and nearby coding gene pairs (distance < 300 kb). # Column A: seqname, the sequence identifier. # Column B: GeneSymbol, the symbol of the LncRNA. # Column C: Fold change - LncRNAs, the ratio of normalized intensities between two samples, positive value indicates up-regulation, and n…
seqname	GeneSymbol	Fold change - LncRNAs	Log Fold change - LncRNAs	Absolute Fold change - LncRNAs	Regulation - LncRNAs	source	RNAlength	Chrom	Strand	txStart	txEnd	GenomeRelationship	NearbyGene	NearbyGeneSymbol	NearbyProteinName	Fold change - mRNAs	Log Fold change - mRNAs	Absolute Fold change - mRNAs	Regulation - mRNAs	NearbyGeneChrom	NearbyGeneStrand	NearbyGenetxStart	NearbyGenetxEnd
ENST00000477702	NCRNA00173	3.23865	1.69539	3.23865	up	Ensembl	314	chr12	+	116973868	116974323	downstream	NM_001109903	RNFT2	RING finger and transmembrane domain-containing	2.15557	1.10807	2.15557	up	chr12	+	117176095	117291436
AK055084		2.11574	1.08116	2.11574	up	misc_RNA	2696	chr12	+	117018780	117021477	downstream	NM_001109903	RNFT2	RING finger and transmembrane domain-containing	2.15557	1.10807	2.15557	up	chr12	+	117176095	117291436
NR_027345	NCRNA00173	2.90768	1.53987	2.90768	up	RefSeq_NR	1597	chr12	+	116971226	116973326	downstream	NM_001109903	RNFT2	RING finger and transmembrane domain-containing	2.15557	1.10807	2.15557	up	chr12	+	117176095	117291436
AK021565		-2.73276	-1.45036	2.73276	down	RNAdb	1903	chr17	+	73599615	73601517	upstream	NM_001031803	LLGL2	lethal(2) giant larvae protein homolog 2 isoform	-8.51115	-3.08935	8.51115	down	chr17	+	73521782	73571290
BC009210	lincRNA-KIAA1199	4.04449	2.01596	4.04449	up	lincRNA	2959	chr15	-	81239669	81282169	upstream	NM_172217	IL16	pro-interleukin-16 isoform 2	3.67429	1.87746	3.67429	up	chr15	+	81517639	81605104
AF319524		-2.95796	-1.5646	2.95796	down	RNAdb	2253	chr15	+	25227154	25266498	upstream	NM_003097	SNRPN	small nuclear ribonucleoprotein-associated	-5.81468	-2.5397	5.81468	down	chr15	+	25200134	25223729
NR_024279	FLJ37453	2.33798	1.22526	2.33798	up	RefSeq_NR	2732	chr1	-	16160709	16174642	upstream	NM_001042704	CLCNKA	chloride channel protein ClC-Ka isoform 2	-45.4076	-5.50486	45.4076	down	chr1	+	16348485	16360545
ENST00000420287	RP11-505F3.4	2.69951	1.4327	2.69951	up	Ensembl	408	chr13	-	73674715	73675123	downstream	NM_006346	PIBF1	progesterone-induced-blocking factor 1	-2.7956	-1.48316	2.7956	down	chr13	+	73356229	73590591
uc001wkc.1	AX746599	-2.66371	-1.41343	2.66371	down	UCSC_knowngene	2524	chr14	+	23982557	24013485	upstream	NM_001042635	NGDN	neuroguidin isoform 1	2.09469	1.06674	2.09469	up	chr14	+	23938897	23947402
uc004bxu.2	BC094873	-4.61093	-2.20506	4.61093	down	UCSC_knowngene	1213	chr9	+	132105694	132106907	downstream	NM_014064	METTL11A	alpha N-terminal protein methyltransferase 1A	-2.38636	-1.25481	2.38636	down	chr9	+	132388434	132397879
ENST00000393071	AC013474.3	-16.1927	-4.01727	16.1927	down	Ensembl	732	chr2	-	127315006	127315739	upstream	NM_016815	GYPC	glycophorin-C isoform 2	-3.36808	-1.75193	3.36808	down	chr2	+	127413683	127454246
AL832122		2.95873	1.56498	2.95873	up	misc_RNA	5572	chr1	-	23607802	23613245	upstream	NM_003196	TCEA3	transcription elongation factor A protein 3	3.53245	1.82067	3.53245	up	chr1	-	23707554	23751261
ENST00000400856	RP11-106M7.2	-2.21471	-1.14712	2.21471	down	Ensembl	499	chr10	+	116569133	116570929	downstream	NM_020940	FAM160B1	hypothetical protein LOC57700 isoform a	2.25647	1.17407	2.25647	up	chr10	+	116581502	116624474
ENST00000427447	AP000569.8	2.15197	1.10566	2.15197	up	Ensembl	9124	chr21	+	35303463	35349992	upstream	NM_001001132	ITSN1	intersectin-1 isoform ITSN-s	2.32747	1.21877	2.32747	up	chr21	+	35014783	35210802
chr1:82115673-82123396-	lincRNA-ELTD1-1	2.04412	1.03148	2.04412	up	lincRNA	7724	chr1	-	82115673	82123396	upstream	NM_012302	LPHN2	latrophilin-2 precursor	-2.14452	-1.10066	2.14452	down	chr1	+	82266081	82458107
BM750448	lincRNA-FAM70A	2.40899	1.26843	2.40899	up	lincRNA	517	chrX	-	119184894	119746242	overlap	NM_139282	RHOXF1	rhox homeobox family member 1	4.52295	2.17726	4.52295	up	chrX	-	119243024	119249847
chr7:143147778-143169303-	lincRNA-TAS2R60	-2.15352	-1.1067	2.15352	down	lincRNA	21526	chr7	-	143147778	143169303	downstream	NM_015917	GSTK1	glutathione S-transferase kappa 1 isoform a	-3.75146	-1.90745	3.75146	down	chr7	+	142960521	142966222
ENST00000509266	AC026979.1	-2.96696	-1.56899	2.96696	down	Ensembl	1967	chr8	-	30044816	30047775	downstream	NM_006571	DCTN6	dynactin subunit 6	-2.21965	-1.15034	2.21965	down	chr8	+	30013812	30041155
uc001hje.2	CR624623	2.28392	1.19151	2.28392	up	UCSC_knowngene	838	chr1	-	212731175	212732013	upstream	NM_001146170	TATDN3	putative deoxyribonuclease TATDN3 isoform 4	-2.14994	-1.1043	2.14994	down	chr1	+	212965169	212990167
DA444159	lincRNA-SLCO2A1	-2.48704	-1.31443	2.48704	down	lincRNA	593	chr3	-	133847907	133877108	upstream	NM_016201	AMOTL2	angiomotin-like protein 2	6.07897	2.60383	6.07897	up	chr3	-	134074189	134093406
uc002cuc.2	BC013599	3.12143	1.64221	3.12143	up	UCSC_knowngene	1114	chr16	-	3178836	3182043	downstream	NM_152341	PAQR4	progestin and adipoQ receptor family member 4	8.54509	3.0951	8.54509	up	chr16	+	3019341	3023485
ENST00000498198	RP11-428G5.1	2.32796	1.21907	2.32796	up	Ensembl	289	chr12	+	32050753	32051042	downstream	NM_018169	C12orf35	hypothetical protein LOC55196	-2.16366	-1.11347	2.16366	down	chr12	+	32112352	32146043
ENST00000433054	RP11-1O7.1	3.05041	1.609	3.05041	up	Ensembl	884	chr2	+	174162356	174163240	upstream	NM_133646	ZAK	mitogen-activated protein kinase kinase kinase	2.98319	1.57685	2.98319	up	chr2	+	173940564	174091873
AK126393		-2.31467	-1.21081	2.31467	down	misc_RNA	2855	chr3	-	112316367	112319222	downstream	NM_017945	SLC35A5	probable UDP-sugar transporter protein SLC35A5	-2.2424	-1.16504	2.2424	down	chr3	+	112280894	112303003
AJ227862		6.2523	2.64439	6.2523	up	misc_RNA	457	chr5	+	102118475	102118934	downstream	NM_000919	PAM	peptidyl-glycine alpha-amidating monooxygenase	-4.04666	-2.01673	4.04666	down	chr5	+	102201526	102366808
AW086055	lincRNA-PRRC2C	-2.60137	-1.37927	2.60137	down	lincRNA	378	chr1	-	171562278	171562866	downstream	NM_002022	FMO4	dimethylaniline monooxygenase [N-oxide-forming]	-19.3368	-4.27327	19.3368	down	chr1	+	171283485	171311223
ENST00000431464	RP11-308D16.4	4.03064	2.01101	4.03064	up	Ensembl	646	chrX	+	135991633	136103777	upstream	NM_001164803	RBMX	heterogeneous nuclear ribonucleoprotein G	-3.94792	-1.98109	3.94792	down	chrX	-	135951352	135962939
NR_024330	NCRNA00085	3.26523	1.70718	3.26523	up	RefSeq_NR	2017	chr19	+	52196592	52208442	upstream	NM_033329	SIGLEC12	sialic acid-binding Ig-like lectin 12 isoform b	2.04286	1.03059	2.04286	up	chr19	-	51994612	52003647
AK124936	lincRNA-FAM47E	-2.18454	-1.12733	2.18454	down	lincRNA	1624	chr4	+	77135192	77204933	downstream	NM_003943	STBD1	starch-binding domain-containing protein 1	10.4253	3.38201	10.4253	up	chr4	+	77227676	77232283
ENST00000513381	RP11-834C11.5	-2.57616	-1.36522	2.57616	down	Ensembl	499	chr12	-	54478915	54519614	upstream	NM_016057	COPZ1	coatomer subunit zeta-1	-4.75614	-2.24979	4.75614	down	chr12	+	54718910	54745633
ENST00000411449	RP11-120J20.1	3.46613	1.79333	3.46613	up	Ensembl	460	chr13	-	111415020	111415480	downstream	NM_198218	ING1	inhibitor of growth protein 1 isoform B	7.76165	2.95636	7.76165	up	chr13	+	111365609	111373421
AX747492	lincRNA-HFE2	-4.48049	-2.16366	4.48049	down	lincRNA	4510	chr1	+	145209144	146424095	overlap	NM_006472	TXNIP	thioredoxin-interacting protein	-20.7651	-4.37609	20.7651	down	chr1	+	145438461	145442628
chrX:118631438-118670334-	lincRNA-SLC25A5-2	-2.27685	-1.18704	2.27685	down	lincRNA	38897	chrX	-	118631438	118670334	downstream	NM_006667	PGRMC1	membrane-associated progesterone receptor	-10.1639	-3.34538	10.1639	down	chrX	+	118370210	118378429
AJ227862		6.2523	2.64439	6.2523	up	misc_RNA	457	chr5	+	102118475	102118934	downstream	NM_138822	PAM	peptidyl-glycine alpha-amidating monooxygenase	-2.38227	-1.25234	2.38227	down	chr5	+	102201526	102366808
AK123196		4.12249	2.04352	4.12249	up	RNAdb	1909	chr2	+	46896008	46897917	upstream	NM_012249	RHOQ	rho-related GTP-binding protein RhoQ precursor	3.60963	1.85185	3.60963	up	chr2	+	46769866	46811827
AK129753		4.97193	2.31381	4.97193	up	misc_RNA	2007	chr11	-	86620031	86622038	downstream	NM_007173	PRSS23	serine protease 23 precursor	2.61391	1.38621	2.61391	up	chr11	+	86511490	86522273
DB288399	lincRNA-ZNF672	-2.13742	-1.09587	2.13742	down	lincRNA	558	chr1	+	249123012	249123570	downstream	NM_024836	ZNF672	zinc finger protein 672	2.79351	1.48208	2.79351	up	chr1	+	249132529	249143714
EG328305	lincRNA-NCS1	2.07475	1.05294	2.07475	up	lincRNA	333	chr9	-	133231603	133234745	upstream	NM_000050	ASS1	argininosuccinate synthase	-2.78458	-1.47746	2.78458	down	chr9	+	133320093	133376661
chr7:143147778-143169303-	lincRNA-TAS2R60	-2.15352	-1.1067	2.15352	down	lincRNA	21526	chr7	-	143147778	143169303	downstream	NM_001143681	GSTK1	glutathione S-transferase kappa 1 isoform d	-4.74735	-2.24712	4.74735	down	chr7	+	142960521	142966222
uc001qhs.2	BC112333	-3.20938	-1.6823	3.20938	down	UCSC_knowngene	1946	chr11	+	134306628	134375017	upstream	NM_052875	VPS26B	vacuolar protein sorting-associated protein 26B	2.27623	1.18664	2.27623	up	chr11	+	134094560	134117686
uc002cuc.2	BC013599	3.12143	1.64221	3.12143	up	UCSC_knowngene	1114	chr16	-	3178836	3182043	downstream	NM_001012635	IL32	interleukin-32 isoform C	-2.3131	-1.20983	2.3131	down	chr16	+	3115611	3119668
AK299029	lincRNA-RAPGEF3	-4.90571	-2.29446	4.90571	down	lincRNA	2776	chr12	-	48131323	48164823	upstream	NM_001143843	TMEM106C	transmembrane protein 106C isoform b	-3.17452	-1.66654	3.17452	down	chr12	+	48357329	48362661
NR_003277	LOC728643	-2.81707	-1.4942	2.81707	down	RefSeq_NR	542	chr10	-	47133296	47133836	downstream	NM_014696	GPRIN2	G protein-regulated inducer of neurite outgrowth	5.86902	2.55312	5.86902	up	chr10	+	46993545	47000568
AX747492	lincRNA-HFE2	-4.48049	-2.16366	4.48049	down	lincRNA	4510	chr1	+	145209144	146424095	overlap	NM_001097616	GPR89C	putative Golgi pH regulator C	-6.83577	-2.7731	6.83577	down	chr1	+	145883867	145924049
ENST00000406671	RP3-351K20.4	2.96765	1.56932	2.96765	up	Ensembl	891	chr6	+	127683657	127684548	upstream	NM_030963	RNF146	E3 ubiquitin-protein ligase RNF146 isoform a	-3.41453	-1.77169	3.41453	down	chr6	+	127588019	127609504
ENST00000446783	RP11-40H20.1	-2.5461	-1.34829	2.5461	down	Ensembl	640	chr1	-	27527324	27527964	downstream	NM_001013642	TRNP1	TMF-regulated nuclear protein 1	2.58788	1.37177	2.58788	up	chr1	+	27320194	27327377
EC495588	lincRNA-RCN2	-4.66549	-2.22203	4.66549	down	lincRNA	90	chr15	-	77271632	77272065	downstream	NM_002902	RCN2	reticulocalbin-2 precursor	-19.5688	-4.29048	19.5688	down	chr15	+	77223961	77242601
uc001lcv.1	DQ596646	2.17496	1.12099	2.17496	up	UCSC_knowngene	2195	chr10	-	118588285	118590480	downstream	NM_006229	PNLIPRP1	pancreatic lipase-related protein 1 precursor	-2.01397	-1.01004	2.01397	down	chr10	+	118350489	118368686
AK131566	lincRNA-NR4A1	-2.08082	-1.05715	2.08082	down	lincRNA	3513	chr12	+	52431498	52453285	downstream	NM_002284	KRT86	keratin, type II cuticular Hb6	3.91874	1.97039	3.91874	up	chr12	+	52695648	52702947
exon99+	lincRNA-CDCP2	2.11224	1.07878	2.11224	up	lincRNA	715	chr1	+	54587441	54588155	upstream	NM_052940	LRRC42	leucine-rich repeat-containing protein 42	-2.0756	-1.05353	2.0756	down	chr1	+	54412036	54433839
ENST00000470614	RP11-69M1.1	3.09326	1.62913	3.09326	up	Ensembl	315	chr12	-	8147365	8147680	upstream	NM_004054	C3AR1	C3a anaphylatoxin chemotactic receptor	3.18539	1.67147	3.18539	up	chr12	-	8210918	8218955
ENST00000509266	AC026979.1	-2.96696	-1.56899	2.96696	down	Ensembl	1967	chr8	-	30044816	30047775	downstream	NM_015344	LEPROTL1	leptin receptor overlapping transcript-like 1	4.85307	2.2789	4.85307	up	chr8	+	29952921	29965587
uc002cuc.2	BC013599	3.12143	1.64221	3.12143	up	UCSC_knowngene	1114	chr16	-	3178836	3182043	downstream	NM_016639	TNFRSF12A	tumor necrosis factor receptor superfamily	-3.56029	-1.83199	3.56029	down	chr16	+	3070312	3072383
AK316271	lincRNA-SUCLA2-1	-4.08204	-2.02929	4.08204	down	lincRNA	1801	chr13	-	48517468	48612125	upstream	NM_021999	ITM2B	integral membrane protein 2B	-7.77614	-2.95905	7.77614	down	chr13	+	48807273	48836232
chr18:46500588-46515984+	lincRNA-DYM-1	2.15964	1.11079	2.15964	up	lincRNA	15397	chr18	+	46500588	46515984	upstream	NM_014772	CTIF	CBP80/20-dependent translation initiation factor	2.25063	1.17033	2.25063	up	chr18	+	46065426	46389586
chr18:46516702-46521932+	lincRNA-DYM-2	2.0279	1.01999	2.0279	up	lincRNA	5231	chr18	+	46516702	46521932	upstream	NM_014772	CTIF	CBP80/20-dependent translation initiation factor	2.25063	1.17033	2.25063	up	chr18	+	46065426	46389586
ENST00000413128	RP11-420K5.1	3.63523	1.86205	3.63523	up	Ensembl	774	chr3	+	39685128	39686196	upstream	NM_002295	RPSA	40S ribosomal protein SA	-4.55251	-2.18666	4.55251	down	chr3	+	39448203	39454032
AX747492	lincRNA-HFE2	-4.48049	-2.16366	4.48049	down	lincRNA	4510	chr1	+	145209144	146424095	upstream	NM_001002810	PDE4DIP	myomegalin isoform 4	4.82794	2.27141	4.82794	up	chr1	-	144951760	144995033
ENST00000429327	BX322559.2	-8.25503	-3.04527	8.25503	down	Ensembl	192	chr21	-	46796105	46796297	upstream	NM_194255	SLC19A1	folate transporter 1 isoform 1	2.24325	1.16559	2.24325	up	chr21	-	46934628	46962385
BI029614	lincRNA-ERF	2.01467	1.01054	2.01467	up	lincRNA	493	chr19	-	42777698	42778182	downstream	NM_133328	DEDD2	DNA-binding death effector domain-containing	4.00534	2.00193	4.00534	up	chr19	-	42702751	42721813
BX112397	lincRNA-FAM183A-2	-3.45767	-1.7898	3.45767	down	lincRNA	753	chr1	+	43464813	43465491	upstream	NM_004559	YBX1	nuclease-sensitive element-binding protein 1	-2.25697	-1.17438	2.25697	down	chr1	+	43148065	43168020
chrX:118631438-118670334-	lincRNA-SLC25A5-2	-2.27685	-1.18704	2.27685	down	lincRNA	38897	chrX	-	118631438	118670334	downstream	NM_001152	SLC25A5	ADP/ATP translocase 2	-2.85787	-1.51494	2.85787	down	chrX	+	118602362	118605359
uc002cuc.2	BC013599	3.12143	1.64221	3.12143	up	UCSC_knowngene	1114	chr16	-	3178836	3182043	downstream	NM_020982	CLDN9	claudin-9	-3.60677	-1.85071	3.60677	down	chr16	+	3062456	3064506
BM750448	lincRNA-FAM70A	2.40899	1.26843	2.40899	up	lincRNA	517	chrX	-	119184894	119746242	overlap	NM_006777	ZBTB33	transcriptional regulator Kaiso	2.64337	1.40238	2.64337	up	chrX	+	119384606	119392251
chr17:55283426-55307276+	lincRNA-MSI2	-3.67768	-1.8788	3.67768	down	lincRNA	23851	chr17	+	55283426	55307276	downstream	NM_170721	MSI2	RNA-binding protein Musashi homolog 2 isoform b	-2.72673	-1.44717	2.72673	down	chr17	+	55334373	55710544
NR_024279	FLJ37453	2.33798	1.22526	2.33798	up	RefSeq_NR	2732	chr1	-	16160709	16174642	downstream	NM_015164	PLEKHM2	pleckstrin homology domain-containing family M	2.01869	1.01342	2.01869	up	chr1	+	16010826	16061264
CB857271	lincRNA-DLK1-1	-3.01581	-1.59255	3.01581	down	lincRNA	349	chr14	-	101257085	101257400	downstream	NM_003836	DLK1	protein delta homolog 1 precursor	-2.03661	-1.02617	2.03661	down	chr14	+	101193201	101201467
NR_026542	C21orf88	2.05911	1.04202	2.05911	up	RefSeq_NR	1469	chr21	-	40969076	40984749	downstream	NM_004627	WRB	tryptophan-rich protein isoform 1	-2.1311	-1.0916	2.1311	down	chr21	+	40752212	40769815
ENST00000442666	AC005042.4	2.40783	1.26773	2.40783	up	Ensembl	825	chr2	-	159535167	159591330	overlap	NM_001005476	PKP4	plakophilin-4 isoform b	-14.3869	-3.84669	14.3869	down	chr2	+	159313475	159537940
AK296158	lincRNA-TMEM30B-1	-4.95969	-2.31025	4.95969	down	lincRNA	1756	chr14	+	61654286	62016579	upstream	NM_002431	MNAT1	CDK-activating kinase assembly factor MAT1	-2.94352	-1.55754	2.94352	down	chr14	+	61201458	61435398
BQ446739	lincRNA-NPPC	-2.53401	-1.34142	2.53401	down	lincRNA	522	chr2	+	232742949	232743639	upstream	NM_001099285	PTMA	prothymosin alpha isoform 1	-2.76823	-1.46897	2.76823	down	chr2	+	232573234	232578250
ENST00000451325	RP11-445P17.5	2.64524	1.4034	2.64524	up	Ensembl	435	chr10	-	5346393	5346828	downstream	NM_003739	AKR1C3	aldo-keto reductase family 1 member C3	-2.3726	-1.24647	2.3726	down	chr10	+	5136567	5149878
DQ269985	lincRNA-AKR1C3-2	-5.16839	-2.36971	5.16839	down	lincRNA	972	chr10	+	5005636	5149693	overlap	NM_003739	AKR1C3	aldo-keto reductase family 1 member C3	-2.3726	-1.24647	2.3726	down	chr10	+	5136567	5149878
BQ446739	lincRNA-NPPC	-2.53401	-1.34142	2.53401	down	lincRNA	522	chr2	+	232742949	232743639	upstream	NM_002601	PDE6D	retinal rod rhodopsin-sensitive cGMP	-2.70958	-1.43807	2.70958	down	chr2	-	232597146	232645974
DB030353	lincRNA-RPUSD4-2	-2.30523	-1.20491	2.30523	down	lincRNA	613	chr11	+	125976772	125977385	downstream	NM_006278	ST3GAL4	CMP-N-acetylneuraminate-beta-galactosamide-	-2.12354	-1.08647	2.12354	down	chr11	+	126226095	126284533
ENST00000498198	RP11-428G5.1	2.32796	1.21907	2.32796	up	Ensembl	289	chr12	+	32050753	32051042	upstream	NM_001135863	METTL20	methyltransferase-like protein 20	-2.60342	-1.38041	2.60342	down	chr12	+	31812608	31822016
AK131566	lincRNA-NR4A1	-2.08082	-1.05715	2.08082	down	lincRNA	3513	chr12	+	52431498	52453285	upstream	NM_181711	GRASP	general receptor for phosphoinositides	2.70861	1.43755	2.70861	up	chr12	+	52400747	52409671
uc002cuc.2	BC013599	3.12143	1.64221	3.12143	up	UCSC_knowngene	1114	chr16	-	3178836	3182043	downstream	NM_001012632	IL32	interleukin-32 isoform B	-2.40222	-1.26437	2.40222	down	chr16	+	3115662	3119668
AK293062	lincRNA-GALNT1-2	-4.10734	-2.0382	4.10734	down	lincRNA	2194	chr18	+	33161002	33290012	upstream	NM_006965	ZNF24	zinc finger protein 24	-3.35967	-1.74832	3.35967	down	chr18	-	32912177	32924426
DQ269985	lincRNA-AKR1C3-2	-5.16839	-2.36971	5.16839	down	lincRNA	972	chr10	+	5005636	5149693	overlap	NM_001353	AKR1C1	aldo-keto reductase family 1 member C1	-9.77016	-3.28838	9.77016	down	chr10	+	5005453	5020158
EG328305	lincRNA-NCS1	2.07475	1.05294	2.07475	up	lincRNA	333	chr9	-	133231603	133234745	upstream	NM_054012	ASS1	argininosuccinate synthase	-3.2552	-1.70275	3.2552	down	chr9	+	133320093	133376661
AK095608		2.24772	1.16846	2.24772	up	NRED	2784	chrX	+	15719056	15721845	upstream	NM_020665	TMEM27	collectrin precursor	-8.56459	-3.09838	8.56459	down	chrX	-	15645440	15683154
ENST00000446783	RP11-40H20.1	-2.5461	-1.34829	2.5461	down	Ensembl	640	chr1	-	27527324	27527964	upstream	NM_004672	MAP3K6	mitogen-activated protein kinase kinase kinase	3.90163	1.96408	3.90163	up	chr1	-	27681669	27693337
BC034527		-2.05099	-1.03632	2.05099	down	misc_RNA	1077	chr1	-	211713915	211714910	downstream	NM_001136225	RCOR3	REST corepressor 3 isoform c	2.04387	1.03131	2.04387	up	chr1	+	211432707	211486655
uc002cuc.2	BC013599	3.12143	1.64221	3.12143	up	UCSC_knowngene	1114	chr16	-	3178836	3182043	downstream	NM_032296	FLYWCH1	FLYWCH-type zinc finger-containing protein 1	2.15519	1.10782	2.15519	up	chr16	+	2961979	3001209
AX747492	lincRNA-HFE2	-4.48049	-2.16366	4.48049	down	lincRNA	4510	chr1	+	145209144	146424095	overlap	NM_203458	NOTCH2NL	notch homolog 2 N-terminal-like protein	2.33385	1.22271	2.33385	up	chr1	+	145209110	145285912
NR_024330	NCRNA00085	3.26523	1.70718	3.26523	up	RefSeq_NR	2017	chr19	+	52196592	52208442	downstream	NM_002030	FPR3	N-formyl peptide receptor 3	2.8989	1.5355	2.8989	up	chr19	+	52298410	52329334
ENST00000435260	AC046176.4	-2.03051	-1.02184	2.03051	down	Ensembl	1170	chr8	-	56962596	56963766	downstream	NM_152417	TMEM68	transmembrane protein 68	-2.41646	-1.2729	2.41646	down	chr8	-	56651319	56685885
chr7:143147778-143169303-	lincRNA-TAS2R60	-2.15352	-1.1067	2.15352	down	lincRNA	21526	chr7	-	143147778	143169303	downstream	NM_001143680	GSTK1	glutathione S-transferase kappa 1 isoform c	-3.8228	-1.93463	3.8228	down	chr7	+	142960521	142966222
AW269809	lincRNA-KPNA1	-2.0333	-1.02383	2.0333	down	lincRNA	382	chr3	-	122233924	122236198	upstream	NM_001146106	PARP9	poly [ADP-ribose] polymerase 9 isoform c	2.40948	1.26872	2.40948	up	chr3	-	122250619	122283194
chr17:55283426-55307276+	lincRNA-MSI2	-3.67768	-1.8788	3.67768	down	lincRNA	23851	chr17	+	55283426	55307276	upstream	NM_021626	SCPEP1	retinoid-inducible serine carboxypeptidase	-7.98661	-2.99758	7.98661	down	chr17	+	55055467	55084129
AK304777	lincRNA-FBLN2-2	2.95283	1.5621	2.95283	up	lincRNA	3873	chr3	+	13573823	13679512	upstream	NM_024827	HDAC11	histone deacetylase 11 isoform 1	3.74986	1.90684	3.74986	up	chr3	+	13521714	13547924
ENST00000340510	AC004987.7	-2.19877	-1.1367	2.19877	down	Ensembl	3049	chr7	+	39773230	39832691	upstream	NM_020192	C7orf36	hypothetical protein LOC57002	2.03591	1.02568	2.03591	up	chr7	+	39606002	39612480
ENST00000442666	AC005042.4	2.40783	1.26773	2.40783	up	Ensembl	825	chr2	-	159535167	159591330	overlap	NM_003628	PKP4	plakophilin-4 isoform a	-5.66525	-2.50214	5.66525	down	chr2	+	159313475	159537940
ENST00000411449	RP11-120J20.1	3.46613	1.79333	3.46613	up	Ensembl	460	chr13	-	111415020	111415480	downstream	NM_024537	CARS2	probable cysteinyl-tRNA synthetase,	-2.45094	-1.29334	2.45094	down	chr13	-	111293756	111358480
BI029614	lincRNA-ERF	2.01467	1.01054	2.01467	up	lincRNA	493	chr19	-	42777698	42778182	upstream	NM_199285	PRR19	proline-rich protein 19	2.57142	1.36256	2.57142	up	chr19	+	42806283	42814973
BI029614	lincRNA-ERF	2.01467	1.01054	2.01467	up	lincRNA	493	chr19	-	42777698	42778182	downstream	NM_022752	ZNF574	zinc finger protein 574	3.31256	1.72795	3.31256	up	chr19	+	42580289	42585720
uc002ukz.1	LOC375295	7.52308	2.91132	7.52308	up	UCSC_knowngene	1156	chr2	-	177494567	177502659	downstream	NM_006554	MTX2	metaxin-2	-2.96584	-1.56844	2.96584	down	chr2	+	177134122	177202753
AK055958		2.6804	1.42245	2.6804	up	misc_RNA	2041	chr14	-	91314205	91316246	upstream	NM_001102369	C14orf159	hypothetical protein LOC80017 isoform c	-3.61171	-1.85268	3.61171	down	chr14	+	91580356	91691703
uc001wkc.1	AX746599	-2.66371	-1.41343	2.66371	down	UCSC_knowngene	2524	chr14	+	23982557	24013485	upstream	NM_004643	PABPN1	polyadenylate-binding protein 2	-60.357	-5.91545	60.357	down	chr14	+	23789396	23795394
AW269809	lincRNA-KPNA1	-2.0333	-1.02383	2.0333	down	lincRNA	382	chr3	-	122233924	122236198	downstream	NM_014367	FAM162A	growth and transformation-dependent protein	-3.32827	-1.73477	3.32827	down	chr3	+	122103022	122128961
AK021565		-2.73276	-1.45036	2.73276	down	RNAdb	1903	chr17	+	73599615	73601517	upstream	NM_004524	LLGL2	lethal(2) giant larvae protein homolog 2 isoform	-10.7619	-3.42786	10.7619	down	chr17	+	73521782	73571290
uc002cuc.2	BC013599	3.12143	1.64221	3.12143	up	UCSC_knowngene	1114	chr16	-	3178836	3182043	upstream	NM_003450	ZNF174	zinc finger protein 174 isoform a	2.09301	1.06558	2.09301	up	chr16	+	3451189	3459364
BC009210	lincRNA-KIAA1199	4.04449	2.01596	4.04449	up	lincRNA	2959	chr15	-	81239669	81282169	overlap	NM_015154	MESDC2	LDLR chaperone MESD	-2.09271	-1.06537	2.09271	down	chr15	-	81268094	81282205
NR_024279	FLJ37453	2.33798	1.22526	2.33798	up	RefSeq_NR	2732	chr1	-	16160709	16174642	downstream	NM_001089591	UQCRHL	ubiquinol-cytochrome c reductase hinge	-2.21143	-1.14498	2.21143	down	chr1	-	16133656	16134194
ENST00000476607	RP11-572M11.2	-2.01568	-1.01127	2.01568	down	Ensembl	425	chr3	-	112760236	112760661	downstream	NM_014170	GTPBP8	GTP-binding protein 8 isoform 1	-2.52588	-1.33678	2.52588	down	chr3	+	112709799	112720221
AJ227862		6.2523	2.64439	6.2523	up	misc_RNA	457	chr5	+	102118475	102118934	downstream	NM_138766	PAM	peptidyl-glycine alpha-amidating monooxygenase	-6.23239	-2.63979	6.23239	down	chr5	+	102201526	102366808
AK124936	lincRNA-FAM47E	-2.18454	-1.12733	2.18454	down	lincRNA	1624	chr4	+	77135192	77204933	upstream	NM_002416	CXCL9	C-X-C motif chemokine 9 precursor	2.08471	1.05984	2.08471	up	chr4	-	76922622	76928641
chrX:118631438-118670334-	lincRNA-SLC25A5-2	-2.27685	-1.18704	2.27685	down	lincRNA	38897	chrX	-	118631438	118670334	upstream	NM_001105576	ANKRD58	ankyrin repeat domain-containing protein 58	6.97663	2.80253	6.97663	up	chrX	+	118892575	118894165
BM750448	lincRNA-FAM70A	2.40899	1.26843	2.40899	up	lincRNA	517	chrX	-	119184894	119746242	downstream	NM_001105576	ANKRD58	ankyrin repeat domain-containing protein 58	6.97663	2.80253	6.97663	up	chrX	+	118892575	118894165
uc002cuc.2	BC013599	3.12143	1.64221	3.12143	up	UCSC_knowngene	1114	chr16	-	3178836	3182043	downstream	NM_001012634	IL32	interleukin-32 isoform C	-2.15224	-1.10584	2.15224	down	chr16	+	3115638	3119668
ENST00000509266	AC026979.1	-2.96696	-1.56899	2.96696	down	Ensembl	1967	chr8	-	30044816	30047775	upstream	NM_001008710	RBPMS	RNA-binding protein with multiple splicing	-3.55612	-1.8303	3.55612	down	chr8	+	30241943	30429734
NR_026542	C21orf88	2.05911	1.04202	2.05911	up	RefSeq_NR	1469	chr21	-	40969076	40984749	upstream	NM_006198	PCP4	Purkinje cell protein 4	-11.3538	-3.5051	11.3538	down	chr21	+	41239346	41301322
DB030353	lincRNA-RPUSD4-2	-2.30523	-1.20491	2.30523	down	lincRNA	613	chr11	+	125976772	125977385	downstream	NM_024556	FAM118B	hypothetical protein LOC79607	-3.44223	-1.78334	3.44223	down	chr11	+	126081618	126132879
ENST00000455212	AC007386.3	3.87121	1.95278	3.87121	up	Ensembl	582	chr2	-	65187186	65187768	upstream	NM_015147	CEP68	centrosomal protein of 68 kDa	2.41974	1.27485	2.41974	up	chr2	+	65283494	65314142
AK125219	lincRNA-HAUS7	2.24226	1.16496	2.24226	up	lincRNA	2124	chrX	-	152713127	152760978	upstream	NM_001170760	SRPK3	serine/threonine-protein kinase SRPK3 isoform 2	-2.34412	-1.22905	2.34412	down	chrX	+	153046455	153051187
BX111887	lincRNA-ZEB1-5	2.50294	1.32362	2.50294	up	lincRNA	500	chr10	-	32048015	32049105	upstream	NM_018287	ARHGAP12	rho GTPase-activating protein 12	-4.25469	-2.08905	4.25469	down	chr10	-	32095224	32217770
uc004bxu.2	BC094873	-4.61093	-2.20506	4.61093	down	UCSC_knowngene	1213	chr9	+	132105694	132106907	upstream	NM_203434	IER5L	immediate early response gene 5-like protein	5.46596	2.45047	5.46596	up	chr9	-	131937830	131940540
BM976593	lincRNA-CDS2	-2.00406	-1.00292	2.00406	down	lincRNA	719	chr20	-	5193468	5194179	downstream	NM_003818	CDS2	phosphatidate cytidylyltransferase 2	-2.39075	-1.25746	2.39075	down	chr20	+	5107481	5171989
AJ493605	lincRNA-C3orf35	3.64251	1.86493	3.64251	up	lincRNA	981	chr3	+	37427759	37459039	upstream	NM_002078	GOLGA4	Golgin subfamily A member 4 isoform 2	-15.6166	-3.96501	15.6166	down	chr3	+	37284681	37408370
ENST00000498198	RP11-428G5.1	2.32796	1.21907	2.32796	up	Ensembl	289	chr12	+	32050753	32051042	downstream	NM_001003398	BICD1	protein bicaudal D homolog 1 isoform 2	2.54261	1.34631	2.54261	up	chr12	+	32260184	32531141
AK297025	lincRNA-FGD4	3.6967	1.88624	3.6967	up	lincRNA	2924	chr12	+	32638905	32793673	upstream	NM_001003398	BICD1	protein bicaudal D homolog 1 isoform 2	2.54261	1.34631	2.54261	up	chr12	+	32260184	32531141
ENST00000470614	RP11-69M1.1	3.09326	1.62913	3.09326	up	Ensembl	315	chr12	-	8147365	8147680	upstream	NM_018088	FAM90A1	hypothetical protein LOC55138	3.53375	1.8212	3.53375	up	chr12	-	8373855	8380214
uc002cuc.2	BC013599	3.12143	1.64221	3.12143	up	UCSC_knowngene	1114	chr16	-	3178836	3182043	downstream	NM_001142350	THOC6	THO complex subunit 6 homolog isoform 2	-4.25915	-2.09056	4.25915	down	chr16	+	3074031	3077756

## Sheet: 119T vs 119N
# Condition pairs: 119T vs 119N # Fold Change cut-off: 2.0 This table contains the differentially expressed lincRNA and nearby coding gene pairs (distance < 300 kb). # Column A: seqname, the sequence identifier. # Column B: GeneSymbol, the symbol of the LncRNA. # Column C: Fold change - LncRNAs, the ratio of normalized intensities between two samples, positive value indicates up-regulation, and n…
seqname	GeneSymbol	Fold change - LncRNAs	Log Fold change - LncRNAs	Absolute Fold change - LncRNAs	Regulation - LncRNAs	source	RNAlength	Chrom	Strand	txStart	txEnd	GenomeRelationship	NearbyGene	NearbyGeneSymbol	NearbyProteinName	Fold change - mRNAs	Log Fold change - mRNAs	Absolute Fold change - mRNAs	Regulation - mRNAs	NearbyGeneChrom	NearbyGeneStrand	NearbyGenetxStart	NearbyGenetxEnd
exon3668+	lincRNA-DACT2-3	-2.50607	-1.32543	2.50607	down	lincRNA	101	chr6	+	168673026	168673126	upstream	NM_030615	KIF25	kinesin-like protein KIF25 isoform 1	-3.22279	-1.68831	3.22279	down	chr6	+	168418552	168445769
chr11:102425615-102440915+	lincRNA-MMP20	-2.61987	-1.3895	2.61987	down	lincRNA	15301	chr11	+	102425615	102440915	upstream	NM_001166	BIRC2	baculoviral IAP repeat-containing protein 2	2.40497	1.26602	2.40497	up	chr11	+	102217965	102249401
ENST00000428294	RP3-449O17.1	-4.71005	-2.23574	4.71005	down	Ensembl	700	chr22	-	38731766	38794921	downstream	NM_001039583	PICK1	PRKCA-binding protein	-2.75012	-1.45949	2.75012	down	chr22	+	38453261	38471708
NR_026857	FLJ90757	-2.51753	-1.33201	2.51753	down	RefSeq_NR	4421	chr17	-	79002932	79008519	upstream	NM_017450	BAIAP2	brain-specific angiogenesis inhibitor	2.50594	1.32535	2.50594	up	chr17	+	79008946	79084312
BC009210	lincRNA-KIAA1199	4.49178	2.16729	4.49178	up	lincRNA	2959	chr15	-	81239669	81282169	upstream	NM_172217	IL16	pro-interleukin-16 isoform 2	4.6982	2.23211	4.6982	up	chr15	+	81517639	81605104
CU692690	lincRNA-TNFRSF13C	-2.07451	-1.05277	2.07451	down	lincRNA	1342	chr22	+	42120333	42423168	upstream	NM_016272	TOB2	protein Tob2	2.46542	1.30184	2.46542	up	chr22	-	41829491	41843027
exon1959+	lincRNA-RBBP8-2	-2.39233	-1.25841	2.39233	down	lincRNA	93	chr18	+	20043793	20043885	upstream	NM_005257	GATA6	transcription factor GATA-6	-2.6461	-1.40387	2.6461	down	chr18	+	19749415	19782227
NR_024279	FLJ37453	2.97473	1.57276	2.97473	up	RefSeq_NR	2732	chr1	-	16160709	16174642	upstream	NM_001042704	CLCNKA	chloride channel protein ClC-Ka isoform 2	-227.535	-7.82994	227.535	down	chr1	+	16348485	16360545
ENST00000420287	RP11-505F3.4	18.5447	4.21294	18.5447	up	Ensembl	408	chr13	-	73674715	73675123	downstream	NM_006346	PIBF1	progesterone-induced-blocking factor 1	2.37161	1.24586	2.37161	up	chr13	+	73356229	73590591
chr7:1348449-1366599+	lincRNA-MICALL2	-3.84884	-1.94442	3.84884	down	lincRNA	18151	chr7	+	1348449	1366599	upstream	NM_001098201	GPER	G-protein coupled estrogen receptor 1	-2.06909	-1.04899	2.06909	down	chr7	+	1127722	1133451
NR_027058	C17orf86	4.00825	2.00297	4.00825	up	RefSeq_NR	2183	chr17	+	75084724	75091067	downstream	NM_001039573	SEC14L1	SEC14-like protein 1 isoform b	2.04692	1.03346	2.04692	up	chr17	+	75137004	75213181
NR_003013	SCARNA16	6.00217	2.58548	6.00217	up	RefSeq_NR	187	chr17	+	75085388	75085574	downstream	NM_001039573	SEC14L1	SEC14-like protein 1 isoform b	2.04692	1.03346	2.04692	up	chr17	+	75137004	75213181
ENST00000366365	C17orf86	4.43495	2.14892	4.43495	up	Ensembl	1028	chr17	+	75084949	75086180	downstream	NM_001039573	SEC14L1	SEC14-like protein 1 isoform b	2.04692	1.03346	2.04692	up	chr17	+	75137004	75213181
AK124321	lincRNA-RNF32-3	-2.43137	-1.28177	2.43137	down	lincRNA	2538	chr7	+	155755325	155759037	upstream	NM_000193	SHH	sonic hedgehog protein preproprotein	-3.63722	-1.86284	3.63722	down	chr7	-	155595557	155604967
AK296158	lincRNA-TMEM30B-1	3.325	1.73335	3.325	up	lincRNA	1756	chr14	+	61654286	62016579	downstream	NM_003082	SNAPC1	snRNA-activating protein complex subunit 1	3.63658	1.86258	3.63658	up	chr14	+	62229074	62263146
ENST00000508827	AL355916.1	-3.46771	-1.79398	3.46771	down	Ensembl	5103	chr14	-	62023037	62037371	upstream	NM_003082	SNAPC1	snRNA-activating protein complex subunit 1	3.63658	1.86258	3.63658	up	chr14	+	62229074	62263146
ENST00000470614	RP11-69M1.1	3.33013	1.73558	3.33013	up	Ensembl	315	chr12	-	8147365	8147680	downstream	NM_001145465	NANOGNB	NANOG neighbor homeobox	-2.13606	-1.09495	2.13606	down	chr12	+	7917811	7926717
uc002bnt.2	LOC254559	-2.40143	-1.26389	2.40143	down	UCSC_knowngene	4778	chr15	+	89904809	89941718	downstream	NM_198525	KIF7	kinesin-like protein KIF7	7.0676	2.82122	7.0676	up	chr15	-	90171200	90198682
AL832122		2.9226	1.54725	2.9226	up	misc_RNA	5572	chr1	-	23607802	23613245	downstream	NM_001142546	LUZP1	leucine zipper protein 1	-3.0239	-1.59641	3.0239	down	chr1	-	23410515	23495351
ENST00000393071	AC013474.3	-3.41595	-1.77229	3.41595	down	Ensembl	732	chr2	-	127315006	127315739	upstream	NM_016815	GYPC	glycophorin-C isoform 2	3.75336	1.90818	3.75336	up	chr2	+	127413683	127454246
ENST00000417473	AC099344.4	-2.41575	-1.27247	2.41575	down	Ensembl	499	chr2	+	11534106	11542372	upstream	NM_152391	PQLC3	PQ-loop repeat-containing protein 3 precursor	4.3116	2.10822	4.3116	up	chr2	+	11295539	11318998
AL832122		2.9226	1.54725	2.9226	up	misc_RNA	5572	chr1	-	23607802	23613245	upstream	NM_003196	TCEA3	transcription elongation factor A protein 3	3.87894	1.95566	3.87894	up	chr1	-	23707554	23751261
ENST00000428947	AP001187.11	-2.2627	-1.17805	2.2627	down	Ensembl	411	chr11	+	64649006	64649417	downstream	NM_138456	BATF2	basic leucine zipper transcriptional factor	3.51403	1.81313	3.51403	up	chr11	-	64755416	64764517
BF336285	lincRNA-PRSS48	-2.8796	-1.52587	2.8796	down	lincRNA	402	chr4	-	152243990	152244383	downstream	NM_001009555	SH3D19	SH3 domain-containing protein 19 isoform a	-2.01235	-1.00888	2.01235	down	chr4	-	152041432	152147660
ENST00000428294	RP3-449O17.1	-4.71005	-2.23574	4.71005	down	Ensembl	700	chr22	-	38731766	38794921	upstream	NM_006855	KDELR3	ER lumen protein retaining receptor 3 isoform a	2.14624	1.10181	2.14624	up	chr22	+	38864082	38879445
CR738423	lincRNA-CTTNBP2NL-1	-3.06475	-1.61577	3.06475	down	lincRNA	700	chr1	+	112548412	112550748	upstream	NM_007204	DDX20	probable ATP-dependent RNA helicase DDX20	-2.02721	-1.0195	2.02721	down	chr1	+	112298189	112310199
ENST00000400856	RP11-106M7.2	-2.51398	-1.32997	2.51398	down	Ensembl	499	chr10	+	116569133	116570929	downstream	NM_020940	FAM160B1	hypothetical protein LOC57700 isoform a	3.81859	1.93304	3.81859	up	chr10	+	116581502	116624474
AW387651	lincRNA-TFE3	-2.13948	-1.09726	2.13948	down	lincRNA	232	chrX	-	48903267	49031062	downstream	NM_005660	SLC35A2	UDP-galactose translocator isoform a	2.70164	1.43384	2.70164	up	chrX	-	48760458	48768917
chr1:77167210-77175109-	lincRNA-ST6GALNAC3	-2.14633	-1.10187	2.14633	down	lincRNA	7900	chr1	-	77167210	77175109	downstream	NM_001160011	ST6GALNAC3	alpha-N-acetylgalactosaminide	2.70862	1.43756	2.70862	up	chr1	+	76540388	77042892
chr10:74002486-74020610+	lincRNA-DDIT4-1	-3.19578	-1.67617	3.19578	down	lincRNA	18125	chr10	+	74002486	74020610	downstream	NM_019058	DDIT4	DNA damage-inducible transcript 4 protein	11.9509	3.57904	11.9509	up	chr10	+	74033676	74035797
ENST00000421191	XXbac-BPG248L24.10	3.16893	1.664	3.16893	up	Ensembl	306	chr6	-	31275591	31276326	upstream	NM_001166538	LST1	leukocyte-specific transcript 1 protein isoform	4.83649	2.27396	4.83649	up	chr6	+	31554976	31556686
uc003nih.2	BC033330	-3.25934	-1.70458	3.25934	down	UCSC_knowngene	2883	chr6	+	26569551	26574925	upstream	NM_007047	BTN3A2	butyrophilin subfamily 3 member A2 isoform a	3.03731	1.60279	3.03731	up	chr6	+	26365397	26378548
ENST00000435408	HCG9P5	-2.10889	-1.07648	2.10889	down	Ensembl	225	chr6	+	29716065	29716290	upstream	NM_001098479	HLA-F	HLA class I histocompatibility antigen, alpha	2.59297	1.37461	2.59297	up	chr6	+	29691116	29695073
NR_001590	IFITM4P	2.31453	1.21072	2.31453	up	RefSeq_NR	342	chr6	-	29718584	29718925	downstream	NM_001098479	HLA-F	HLA class I histocompatibility antigen, alpha	2.59297	1.37461	2.59297	up	chr6	+	29691116	29695073
ENST00000441380	IFITM4P	2.55673	1.3543	2.55673	up	Ensembl	420	chr6	-	29718505	29718925	downstream	NM_001098479	HLA-F	HLA class I histocompatibility antigen, alpha	2.59297	1.37461	2.59297	up	chr6	+	29691116	29695073
NR_001590	IFITM4P	2.31453	1.21072	2.31453	up	RefSeq_NR	342	chr6	-	29718584	29718925	downstream	NM_018950	HLA-F	HLA class I histocompatibility antigen, alpha	4.72533	2.24041	4.72533	up	chr6	+	29691116	29694303
ENST00000441380	IFITM4P	2.55673	1.3543	2.55673	up	Ensembl	420	chr6	-	29718505	29718925	downstream	NM_018950	HLA-F	HLA class I histocompatibility antigen, alpha	4.72533	2.24041	4.72533	up	chr6	+	29691116	29694303
ENST00000435408	HCG9P5	-2.10889	-1.07648	2.10889	down	Ensembl	225	chr6	+	29716065	29716290	upstream	NM_018950	HLA-F	HLA class I histocompatibility antigen, alpha	4.72533	2.24041	4.72533	up	chr6	+	29691116	29694303
chr8:99342599-99355474+	lincRNA-KCNS2-1	-2.06897	-1.04891	2.06897	down	lincRNA	12876	chr8	+	99342599	99355474	upstream	NM_005836	HRSP12	ribonuclease UK114	-3.69952	-1.88734	3.69952	down	chr8	-	99114566	99129418
ENST00000505358	AC004611.1	-2.37439	-1.24756	2.37439	down	Ensembl	1207	chr19	+	5558184	5581226	downstream	NM_198708	HSD11B1L	hydroxysteroid 11-beta-dehydrogenase 1-like	-2.30824	-1.20679	2.30824	down	chr19	+	5681074	5688533
BX101441	lincRNA-C10orf46-1	-3.7975	-1.92505	3.7975	down	lincRNA	712	chr10	+	120374728	120375440	upstream	NM_004248	PRLHR	prolactin-releasing peptide receptor	-2.93762	-1.55465	2.93762	down	chr10	-	120352915	120355160
AF083120		-2.76941	-1.46958	2.76941	down	misc_RNA	158	chr11	+	62321164	62321291	downstream	NM_002696	POLR2G	DNA-directed RNA polymerase II subunit RPB7	2.38129	1.25175	2.38129	up	chr11	+	62529010	62534187
BQ695043	lincRNA-FRZB	2.00475	1.00342	2.00475	up	lincRNA	726	chr2	-	183786672	183787397	downstream	NM_001463	FRZB	secreted frizzled-related protein 3 precursor	5.19244	2.37641	5.19244	up	chr2	-	183698004	183731498
ENST00000509266	AC026979.1	-3.13418	-1.64809	3.13418	down	Ensembl	1967	chr8	-	30044816	30047775	downstream	NM_006571	DCTN6	dynactin subunit 6	2.82657	1.49905	2.82657	up	chr8	+	30013812	30041155
uc003nih.2	BC033330	-3.25934	-1.70458	3.25934	down	UCSC_knowngene	2883	chr6	+	26569551	26574925	upstream	NM_001145009	BTN3A1	butyrophilin subfamily 3 member A1 isoform d	3.04046	1.60429	3.04046	up	chr6	+	26402464	26415444
AI269079	lincRNA-ANXA5	-2.8081	-1.4896	2.8081	down	lincRNA	462	chr4	+	122588554	122589016	upstream	NM_198179	QRFPR	pyroglutamylated RFamide peptide receptor	11.0314	3.46354	11.0314	up	chr4	-	122249796	122302181
chr7:73684091-73687309+	lincRNA-CLIP2	-2.35946	-1.23846	2.35946	down	lincRNA	3219	chr7	+	73684091	73687309	upstream	NM_031992	EIF4H	eukaryotic translation initiation factor 4H	2.38498	1.25398	2.38498	up	chr7	+	73588705	73611429
ENST00000429327	BX322559.2	-3.76615	-1.91309	3.76615	down	Ensembl	192	chr21	-	46796105	46796297	downstream	NM_015833	ADARB1	double-stranded RNA-specific editase 1 isoform	2.10909	1.07662	2.10909	up	chr21	+	46494492	46646478
BX508282	lincRNA-KCNMA1-2	-2.18081	-1.12487	2.18081	down	lincRNA	808	chr10	+	78326700	78327512	upstream	NM_032024	C10orf11	leucine-rich repeat-containing protein C10orf11	2.46822	1.30347	2.46822	up	chr10	+	77542518	78317126
ENST00000416845	AC093159.1	-2.61896	-1.389	2.61896	down	Ensembl	424	chr2	+	62690261	62691205	downstream	NM_001142615	EHBP1	EH domain-binding protein 1 isoform 3	-3.65935	-1.87159	3.65935	down	chr2	+	62900985	63273621
exon2995-	lincRNA-TMEM174-2	-3.10803	-1.636	3.10803	down	lincRNA	180	chr5	-	72715548	72715727	downstream	NM_153217	TMEM174	transmembrane protein 174	-7.01732	-2.81092	7.01732	down	chr5	+	72469022	72470970
uc003imv.2	DKFZp434I0714	2.74921	1.45902	2.74921	up	UCSC_knowngene	2999	chr4	+	153457415	153460414	downstream	NM_014447	ARFIP1	arfaptin-1 isoform 2	-2.0479	-1.03414	2.0479	down	chr4	+	153701111	153833063
ENST00000445730	RP11-525A16.1	2.49209	1.31736	2.49209	up	Ensembl	497	chr10	-	112188597	112255954	upstream	NM_001134363	RBM20	probable RNA-binding protein 20	-2.65564	-1.40906	2.65564	down	chr10	+	112404154	112599227
uc009wxq.1	BC039493	-2.35939	-1.23841	2.35939	down	UCSC_knowngene	538	chr1	+	181143619	181151340	upstream	NM_004736	XPR1	xenotropic and polytropic retrovirus receptor 1	-2.29568	-1.19892	2.29568	down	chr1	+	180601145	180859415
chr1:181081092-181121244+	lincRNA-CACNA1E-3	-3.67273	-1.87685	3.67273	down	lincRNA	40153	chr1	+	181081092	181121244	upstream	NM_004736	XPR1	xenotropic and polytropic retrovirus receptor 1	-2.29568	-1.19892	2.29568	down	chr1	+	180601145	180859415
AI269079	lincRNA-ANXA5	-2.8081	-1.4896	2.8081	down	lincRNA	462	chr4	+	122588554	122589016	downstream	NM_005033	EXOSC9	exosome complex component RRP45 isoform 2	3.33871	1.73929	3.33871	up	chr4	+	122722471	122738176
ENST00000505358	AC004611.1	-2.37439	-1.24756	2.37439	down	Ensembl	1207	chr19	+	5558184	5581226	downstream	NM_001040701	FUT6	alpha-(1,3)-fucosyltransferase	-2.09708	-1.06838	2.09708	down	chr19	-	5830636	5839742
ENST00000505358	AC004611.1	-2.37439	-1.24756	2.37439	down	Ensembl	1207	chr19	+	5558184	5581226	downstream	NM_152784	TMEM146	transmembrane protein 146 precursor	-2.56198	-1.35726	2.56198	down	chr19	+	5720687	5778742
AK096322	lincRNA-FBRS	5.0325	2.33128	5.0325	up	lincRNA	2890	chr16	+	30671242	30682130	upstream	NM_145271	ZNF688	zinc finger protein 688 isoform a	-2.74783	-1.45829	2.74783	down	chr16	-	30581018	30583728
ENST00000433054	RP11-1O7.1	2.05508	1.0392	2.05508	up	Ensembl	884	chr2	+	174162356	174163240	upstream	NM_133646	ZAK	mitogen-activated protein kinase kinase kinase	7.22474	2.85295	7.22474	up	chr2	+	173940564	174091873
DB251409	lincRNA-STARD3NL-2	-2.4718	-1.30556	2.4718	down	lincRNA	551	chr7	+	37960700	38166514	downstream	NM_001003799	TARP	TCR gamma alternate reading frame protein	2.02379	1.01706	2.02379	up	chr7	-	38299243	38313248
AW075897	lincRNA-SIN3A	-2.50948	-1.32739	2.50948	down	lincRNA	521	chr15	-	75750735	75751256	downstream	NM_017828	COMMD4	COMM domain-containing protein 4	2.14434	1.10054	2.14434	up	chr15	+	75628373	75632614
BF108976	lincRNA-MYO1B-4	-3.60762	-1.85105	3.60762	down	lincRNA	509	chr2	+	192068946	192069452	upstream	NM_007315	STAT1	signal transducer and activator of transcription	2.53784	1.3436	2.53784	up	chr2	-	191833761	191878976
AJ227862		3.69054	1.88383	3.69054	up	misc_RNA	457	chr5	+	102118475	102118934	downstream	NM_000919	PAM	peptidyl-glycine alpha-amidating monooxygenase	2.10156	1.07146	2.10156	up	chr5	+	102201526	102366808
AW387651	lincRNA-TFE3	-2.13948	-1.09726	2.13948	down	lincRNA	232	chrX	-	48903267	49031062	downstream	NM_001032384	PQBP1	polyglutamine-binding protein 1 isoform 1	-2.866	-1.51904	2.866	down	chrX	+	48755538	48760420
AW086055	lincRNA-PRRC2C	2.4972	1.32031	2.4972	up	lincRNA	378	chr1	-	171562278	171562866	downstream	NM_002022	FMO4	dimethylaniline monooxygenase [N-oxide-forming]	-3.31051	-1.72705	3.31051	down	chr1	+	171283485	171311223
EB388332	lincRNA-MYOC	4.00787	2.00284	4.00787	up	lincRNA	699	chr1	+	171561933	171562679	upstream	NM_002022	FMO4	dimethylaniline monooxygenase [N-oxide-forming]	-3.31051	-1.72705	3.31051	down	chr1	+	171283485	171311223
AA827066	lincRNA-KIRREL3-1	-3.75634	-1.90933	3.75634	down	lincRNA	472	chr11	-	128165590	128166053	upstream	NM_001162422	ETS1	protein C-ets-1 isoform 3	-2.45065	-1.29317	2.45065	down	chr11	-	128328655	128392205
ENST00000428947	AP001187.11	-2.2627	-1.17805	2.2627	down	Ensembl	411	chr11	+	64649006	64649417	downstream	NM_006244	PPP2R5B	serine/threonine-protein phosphatase 2A 56 kDa	2.41989	1.27494	2.41989	up	chr11	+	64692142	64701950
BX112397	lincRNA-FAM183A-2	-2.51719	-1.33182	2.51719	down	lincRNA	753	chr1	+	43464813	43465491	downstream	NM_144626	TMEM125	transmembrane protein 125	2.63876	1.39986	2.63876	up	chr1	+	43735664	43739673
DA922283	lincRNA-TH	-2.01422	-1.01022	2.01422	down	lincRNA	568	chr11	-	2229882	2230451	upstream	NM_000218	KCNQ1	potassium voltage-gated channel subfamily KQT	-2.35417	-1.23522	2.35417	down	chr11	+	2466220	2870340
AK124936	lincRNA-FAM47E	2.05308	1.03779	2.05308	up	lincRNA	1624	chr4	+	77135192	77204933	downstream	NM_003943	STBD1	starch-binding domain-containing protein 1	5.21607	2.38296	5.21607	up	chr4	+	77227676	77232283
BF950033	lincRNA-ARID1A	-2.30689	-1.20595	2.30689	down	lincRNA	283	chr1	+	26948061	26948325	upstream	NM_001006665	RPS6KA1	ribosomal protein S6 kinase alpha-1 isoform b	12.9414	3.69393	12.9414	up	chr1	+	26872342	26901520
CF128868	lincRNA-DLL1-2	-4.56385	-2.19025	4.56385	down	lincRNA	705	chr6	+	170349016	170349726	upstream	NM_001029863	C6orf120	hypothetical protein LOC387263 precursor	2.70234	1.43421	2.70234	up	chr6	+	170102256	170106402
ENST00000413128	RP11-420K5.1	2.19011	1.131	2.19011	up	Ensembl	774	chr3	+	39685128	39686196	upstream	NM_001012321	RPSA	40S ribosomal protein SA	2.19209	1.13231	2.19209	up	chr3	+	39449110	39454032
uc002nwh.1	DQ593116	-2.12257	-1.08582	2.12257	down	UCSC_knowngene	118	chr19	-	35306610	35306728	downstream	NM_001012320	ZNF302	zinc finger protein 302	2.85459	1.51329	2.85459	up	chr19	+	35168566	35177302
ENST00000505358	AC004611.1	-2.37439	-1.24756	2.37439	down	Ensembl	1207	chr19	+	5558184	5581226	downstream	NM_000149	FUT3	galactoside 3(4)-L-fucosyltransferase	-2.65388	-1.40811	2.65388	down	chr19	-	5842898	5851485
BG260387	lincRNA-KRR1	-2.77759	-1.47383	2.77759	down	lincRNA	749	chr12	-	75957052	76377795	downstream	NM_006851	GLIPR1	glioma pathogenesis-related protein 1 precursor	4.4915	2.1672	4.4915	up	chr12	+	75874512	75895716
CU692690	lincRNA-TNFRSF13C	-2.07451	-1.05277	2.07451	down	lincRNA	1342	chr22	+	42120333	42423168	upstream	NM_014460	CSDC2	cold shock domain-containing protein C2	-4.93958	-2.30439	4.93958	down	chr22	+	41957013	41972670
AK128058	lincRNA-ZNF532	4.55822	2.18847	4.55822	up	lincRNA	6183	chr18	+	56529831	56653197	overlap	NM_018181	ZNF532	zinc finger protein 532	-2.40519	-1.26615	2.40519	down	chr18	+	56530060	56653709
NR_024279	FLJ37453	2.97473	1.57276	2.97473	up	RefSeq_NR	2732	chr1	-	16160709	16174642	overlap	NM_015001	SPEN	msx2-interacting protein	2.08526	1.06023	2.08526	up	chr1	+	16174358	16266950
uc003yed.2	CR590356	-2.03272	-1.02341	2.03272	down	UCSC_knowngene	1430	chr8	-	90729655	90769797	upstream	NM_001359	DECR1	2,4-dienoyl-CoA reductase, mitochondrial	-2.09022	-1.06366	2.09022	down	chr8	+	91013579	91064227
chr20:2142500-2155375-	lincRNA-STK35	-2.59585	-1.37621	2.59585	down	lincRNA	12876	chr20	-	2142500	2155375	downstream	NM_080792	SIRPA	tyrosine-protein phosphatase non-receptor type	6.48405	2.69689	6.48405	up	chr20	+	1875424	1920540
ENST00000428294	RP3-449O17.1	-4.71005	-2.23574	4.71005	down	Ensembl	700	chr22	-	38731766	38794921	downstream	NM_001039584	PICK1	PRKCA-binding protein	-2.8009	-1.48589	2.8009	down	chr22	+	38453261	38471708
N80091	lincRNA-SPATA8-3	-2.33791	-1.22522	2.33791	down	lincRNA	436	chr15	+	96886179	96888182	upstream	NM_001145157	NR2F2	COUP transcription factor 2 isoform c	-2.27312	-1.18467	2.27312	down	chr15	+	96876568	96883492
CA442294	lincRNA-PARD3	-2.34783	-1.23133	2.34783	down	lincRNA	693	chr10	+	33653361	33654040	upstream	NM_001024628	NRP1	neuropilin-1 isoform b	4.1424	2.05047	4.1424	up	chr10	-	33486546	33623833
AK091805		3.56413	1.83355	3.56413	up	misc_RNA	2929	chr2	-	10702420	10706491	upstream	NM_001039362	ATP6V1C2	V-type proton ATPase subunit C 2 isoform a	-2.02155	-1.01546	2.02155	down	chr2	+	10861774	10925236
DB349331	lincRNA-CTNND1	-2.36049	-1.23909	2.36049	down	lincRNA	556	chr11	-	57603513	57604068	downstream	NM_001331	CTNND1	catenin delta-1 isoform 1B	-2.07738	-1.05476	2.07738	down	chr11	+	57529233	57586652
uc002qsa.2	LOC113386	2.14223	1.09911	2.14223	up	UCSC_knowngene	1396	chr19	+	58816739	58827011	downstream	NM_181846	ZSCAN22	zinc finger and SCAN domain-containing protein	4.06187	2.02214	4.06187	up	chr19	+	58838384	58853712
chr7:117584264-117586960+	lincRNA-NAA38	-4.67691	-2.22556	4.67691	down	lincRNA	2697	chr7	+	117584264	117586960	downstream	NM_016200	NAA38	N-alpha-acetyltransferase 38, NatC auxiliary	2.02468	1.0177	2.02468	up	chr7	+	117824085	117844093
AK129753		3.24269	1.69719	3.24269	up	misc_RNA	2007	chr11	-	86620031	86622038	downstream	NM_007173	PRSS23	serine protease 23 precursor	4.0587	2.02102	4.0587	up	chr11	+	86511490	86522273
exon848+	lincRNA-ZW10	-3.69946	-1.88732	3.69946	down	lincRNA	153	chr11	+	113592424	113592576	downstream	NM_213621	HTR3A	5-hydroxytryptamine receptor 3A isoform a	-2.73068	-1.44926	2.73068	down	chr11	+	113845796	113861034
exon847+	lincRNA-ZW10	-4.05083	-2.01822	4.05083	down	lincRNA	440	chr11	+	113591786	113592225	downstream	NM_213621	HTR3A	5-hydroxytryptamine receptor 3A isoform a	-2.73068	-1.44926	2.73068	down	chr11	+	113845796	113861034
chr3:194505234-194523815+	lincRNA-C3orf21-1	-2.00371	-1.00267	2.00371	down	lincRNA	18582	chr3	+	194505234	194523815	upstream	NM_153690	FAM43A	hypothetical protein LOC131583	6.53842	2.70894	6.53842	up	chr3	+	194406621	194409766
AL049252		-3.04995	-1.60879	3.04995	down	NRED	3343	chr6	-	30268570	30271892	upstream	NM_025263	PRR3	proline-rich protein 3 isoform a	-2.51943	-1.3331	2.51943	down	chr6	+	30524485	30532473
NR_024053	HCG18	-2.06815	-1.04834	2.06815	down	RefSeq_NR	6600	chr6	-	30255173	30294927	upstream	NM_025263	PRR3	proline-rich protein 3 isoform a	-2.51943	-1.3331	2.51943	down	chr6	+	30524485	30532473
chr14:25152560-25164885-	lincRNA-GZMB	-2.25171	-1.17102	2.25171	down	lincRNA	12326	chr14	-	25152560	25164885	downstream	NM_004131	GZMB	granzyme B precursor	10.8184	3.43541	10.8184	up	chr14	-	25100160	25103432
ENST00000415252	RP1-3D11.2	-3.52738	-1.8186	3.52738	down	Ensembl	457	chrX	-	106756212	106789051	upstream	NM_002764	PRPS1	ribose-phosphate pyrophosphokinase 1 isoform 1	5.40898	2.43536	5.40898	up	chrX	+	106871653	106894256
ENST00000505910	RP11-723O4.3	-2.12666	-1.08859	2.12666	down	Ensembl	329	chr3	+	128588466	128588869	downstream	NM_024768	CCDC48	coiled-coil domain-containing protein 48	5.31816	2.41093	5.31816	up	chr3	+	128720471	128759585
BC146281	lincRNA-C14orf104	2.90273	1.53741	2.90273	up	lincRNA	3292	chr14	-	50033026	50319473	upstream	NM_001663	ARF6	ADP-ribosylation factor 6	2.03256	1.0233	2.03256	up	chr14	+	50359735	50363772
ENST00000494283	RP11-58E21.1	-2.45223	-1.29409	2.45223	down	Ensembl	713	chr14	+	50519574	50520287	upstream	NM_001663	ARF6	ADP-ribosylation factor 6	2.03256	1.0233	2.03256	up	chr14	+	50359735	50363772
CN412465	lincRNA-FGD2	-2.78681	-1.47861	2.78681	down	lincRNA	563	chr6	-	37103028	37103592	downstream	NM_152734	C6orf89	hypothetical protein LOC221477	2.19603	1.1349	2.19603	up	chr6	+	36853639	36896740
BX112397	lincRNA-FAM183A-2	-2.51719	-1.33182	2.51719	down	lincRNA	753	chr1	+	43464813	43465491	upstream	NM_015911	ZNF691	zinc finger protein 691 isoform 2	2.54973	1.35034	2.54973	up	chr1	+	43312279	43318146
chr5:126903301-126920351-	lincRNA-PRRC1	-2.16394	-1.11366	2.16394	down	lincRNA	17051	chr5	-	126903301	126920351	upstream	NM_001127385	CTXN3	cortexin-3	-6.25807	-2.64572	6.25807	down	chr5	+	126988706	126994322
AK097799		-2.04847	-1.03455	2.04847	down	misc_RNA	1756	chr4	+	140099193	140100951	downstream	NM_031296	RAB33B	ras-related protein Rab-33B	2.65498	1.4087	2.65498	up	chr4	+	140374960	140397069
BE439827	lincRNA-MAS1	-2.05816	-1.04136	2.05816	down	lincRNA	652	chr6	-	160373545	160374196	upstream	NM_003057	SLC22A1	solute carrier family 22 member 1 isoform a	-2.69424	-1.42988	2.69424	down	chr6	+	160542862	160579750
AK026910	lincRNA-CROCC	-2.41114	-1.26972	2.41114	down	lincRNA	1883	chr1	+	17066767	17270032	overlap	NM_014675	CROCC	rootletin	2.70932	1.43793	2.70932	up	chr1	+	17248444	17299474
ENST00000423122	RP11-65J3.1	-2.35478	-1.23559	2.35478	down	Ensembl	545	chr9	+	132104121	132121817	upstream	NM_032809	FAM73B	hypothetical protein LOC84895	2.85353	1.51275	2.85353	up	chr9	+	131799252	131834351
uc004bxu.2	BC094873	-2.83747	-1.50461	2.83747	down	UCSC_knowngene	1213	chr9	+	132105694	132106907	upstream	NM_032809	FAM73B	hypothetical protein LOC84895	2.85353	1.51275	2.85353	up	chr9	+	131799252	131834351
exon2995-	lincRNA-TMEM174-2	-3.10803	-1.636	3.10803	down	lincRNA	180	chr5	-	72715548	72715727	upstream	NM_001207	BTF3	transcription factor BTF3 isoform B	2.68507	1.42496	2.68507	up	chr5	+	72794249	72801448
BQ303919	lincRNA-RGNEF-3	-2.40011	-1.2631	2.40011	down	lincRNA	549	chr5	-	72797022	73644097	overlap	NM_001207	BTF3	transcription factor BTF3 isoform B	2.68507	1.42496	2.68507	up	chr5	+	72794249	72801448
DA922283	lincRNA-TH	-2.01422	-1.01022	2.01422	down	lincRNA	568	chr11	-	2229882	2230451	downstream	NM_000207	INS	insulin preproprotein	-2.07444	-1.05272	2.07444	down	chr11	-	2181008	2182439
AW387651	lincRNA-TFE3	-2.13948	-1.09726	2.13948	down	lincRNA	232	chrX	-	48903267	49031062	upstream	NM_006150	PRICKLE3	prickle-like protein 3	-2.38073	-1.2514	2.38073	down	chrX	-	49031905	49042776
NR_028408	LOC400027	2.09403	1.06628	2.09403	up	RefSeq_NR	2202	chr12	-	46119502	46121704	downstream	NM_001025356	ANO6	anoctamin-6 isoform a	3.05217	1.60983	3.05217	up	chr12	+	45609769	45826134
uc002nwh.1	DQ593116	-2.12257	-1.08582	2.12257	down	UCSC_knowngene	118	chr19	-	35306610	35306728	upstream	NM_182983	HPN	serine protease hepsin	-2.3144	-1.21064	2.3144	down	chr19	+	35531409	35557477
AK056943		-2.18792	-1.12956	2.18792	down	misc_RNA	1856	chr20	+	23128722	23130576	downstream	NM_013248	NXT1	NTF2-related export protein 1	2.92025	1.54609	2.92025	up	chr20	+	23331372	23335408
ENST00000340510	AC004987.7	-3.56147	-1.83247	3.56147	down	Ensembl	3049	chr7	+	39773230	39832691	upstream	NM_001166018	POU6F2	POU domain, class 6, transcription factor 2	-2.97257	-1.57171	2.97257	down	chr7	+	39017608	39504390
NR_024279	FLJ37453	2.97473	1.57276	2.97473	up	RefSeq_NR	2732	chr1	-	16160709	16174642	downstream	NM_001024215	FBLIM1	filamin-binding LIM protein 1 isoform b	2.25277	1.1717	2.25277	up	chr1	+	16090993	16101715
ENST00000509266	AC026979.1	-3.13418	-1.64809	3.13418	down	Ensembl	1967	chr8	-	30044816	30047775	upstream	NM_001008711	RBPMS	RNA-binding protein with multiple splicing	-2.26225	-1.17776	2.26225	down	chr8	+	30241943	30429734
BC037864	lincRNA-CD247	4.05652	2.02024	4.05652	up	lincRNA	4577	chr1	+	167391146	167395664	downstream	NM_052862	RCSD1	capZ-interacting protein	14.3313	3.8411	14.3313	up	chr1	+	167599473	167675486
chr5:172618919-172633619+	lincRNA-NKX2-5-1	-2.14927	-1.10385	2.14927	down	lincRNA	14701	chr5	+	172618919	172633619	upstream	NM_001031711	ERGIC1	endoplasmic reticulum-Golgi intermediate	2.01052	1.00757	2.01052	up	chr5	+	172261222	172379688
uc001dqu.2	BC030750	-2.53452	-1.34171	2.53452	down	UCSC_knowngene	1327	chr1	-	95123089	95285834	upstream	NM_144988	ALG14	UDP-N-acetylglucosamine transferase subunit	2.04925	1.0351	2.04925	up	chr1	-	95448278	95538507
chr1:95438681-95440571-	lincRNA-CNN3	-4.35986	-2.12428	4.35986	down	lincRNA	1891	chr1	-	95438681	95440571	upstream	NM_144988	ALG14	UDP-N-acetylglucosamine transferase subunit	2.04925	1.0351	2.04925	up	chr1	-	95448278	95538507
ENST00000442418	RP11-86H7.1	-3.39489	-1.76337	3.39489	down	Ensembl	748	chr1	-	95104016	95285652	upstream	NM_144988	ALG14	UDP-N-acetylglucosamine transferase subunit	2.04925	1.0351	2.04925	up	chr1	-	95448278	95538507
CV346902	lincRNA-TMEM45B-1	-2.66615	-1.41476	2.66615	down	lincRNA	589	chr11	+	129596130	129596709	downstream	NM_138788	TMEM45B	transmembrane protein 45B	-3.07465	-1.62042	3.07465	down	chr11	+	129685740	129729898
uc003tbd.2	BC041636	2.26414	1.17896	2.26414	up	UCSC_knowngene	1130	chr7	-	30555927	30601744	upstream	NM_006774	INMT	indolethylamine N-methyltransferase isoform 1	-2.15236	-1.10592	2.15236	down	chr7	+	30791750	30797218
ENST00000421191	XXbac-BPG248L24.10	3.16893	1.664	3.16893	up	Ensembl	306	chr6	-	31275591	31276326	upstream	NM_205840	LST1	leukocyte-specific transcript 1 protein isoform	3.53065	1.81994	3.53065	up	chr6	+	31554976	31556686
BF950033	lincRNA-ARID1A	-2.30689	-1.20595	2.30689	down	lincRNA	283	chr1	+	26948061	26948325	downstream	NM_032283	ZDHHC18	palmitoyltransferase ZDHHC18	2.14682	1.1022	2.14682	up	chr1	+	27153200	27182211
AA457263	lincRNA-GPR61	-2.12129	-1.08494	2.12129	down	lincRNA	451	chr1	+	110072368	110072818	downstream	NM_203404	AMPD2	AMP deaminase 2 isoform 3	-3.23211	-1.69248	3.23211	down	chr1	+	110168048	110174677
ENST00000470614	RP11-69M1.1	3.33013	1.73558	3.33013	up	Ensembl	315	chr12	-	8147365	8147680	upstream	NM_004054	C3AR1	C3a anaphylatoxin chemotactic receptor	7.291	2.86612	7.291	up	chr12	-	8210918	8218955
ENST00000435408	HCG9P5	-2.10889	-1.07648	2.10889	down	Ensembl	225	chr6	+	29716065	29716290	downstream	NM_002116	HLA-A	HLA class I histocompatibility antigen, A-1	5.57472	2.4789	5.57472	up	chr6	+	29910308	29913661
ENST00000441380	IFITM4P	2.55673	1.3543	2.55673	up	Ensembl	420	chr6	-	29718505	29718925	upstream	NM_002116	HLA-A	HLA class I histocompatibility antigen, A-1	5.57472	2.4789	5.57472	up	chr6	+	29910308	29913661
NR_001590	IFITM4P	2.31453	1.21072	2.31453	up	RefSeq_NR	342	chr6	-	29718584	29718925	upstream	NM_002116	HLA-A	HLA class I histocompatibility antigen, A-1	5.57472	2.4789	5.57472	up	chr6	+	29910308	29913661
ENST00000509266	AC026979.1	-3.13418	-1.64809	3.13418	down	Ensembl	1967	chr8	-	30044816	30047775	downstream	NM_015344	LEPROTL1	leptin receptor overlapping transcript-like 1	5.62524	2.49192	5.62524	up	chr8	+	29952921	29965587
BX953928	lincRNA-DOK2	-5.80451	-2.53717	5.80451	down	lincRNA	442	chr8	+	21714378	21714822	downstream	NM_003974	DOK2	docking protein 2	8.77113	3.13276	8.77113	up	chr8	-	21766383	21771205
ENST00000480386	RP11-357H14.4	-2.40389	-1.26537	2.40389	down	Ensembl	566	chr17	+	46706036	46712294	downstream	NM_005175	ATP5G1	ATP synthase lipid-binding protein,	-3.46648	-1.79347	3.46648	down	chr17	+	46970147	46973232
ENST00000435695	AC002454.1	-2.11056	-1.07762	2.11056	down	Ensembl	432	chr7	+	92465796	92546501	downstream	NM_001039372	HEPACAM2	HEPACAM family member 2 isoform 1	-2.27558	-1.18624	2.27558	down	chr7	-	92817899	92855782
BC037864	lincRNA-CD247	4.05652	2.02024	4.05652	up	lincRNA	4577	chr1	+	167391146	167395664	upstream	NM_001080426	DUSP27	inactive dual specificity phosphatase 27	-3.01522	-1.59226	3.01522	down	chr1	+	167064086	167098402
ENST00000433480	RP11-305D15.2	-2.4439	-1.28919	2.4439	down	Ensembl	829	chr13	-	48870962	48877797	downstream	NM_021999	ITM2B	integral membrane protein 2B	-2.05772	-1.04105	2.05772	down	chr13	+	48807273	48836232
AA972029	lincRNA-MPDZ-1	-2.10446	-1.07345	2.10446	down	lincRNA	419	chr9	+	12958862	12959235	upstream	NM_000550	TYRP1	5,6-dihydroxyindole-2-carboxylic acid oxidase	-2.4398	-1.28676	2.4398	down	chr9	+	12693385	12710266
BE439827	lincRNA-MAS1	-2.05816	-1.04136	2.05816	down	lincRNA	652	chr6	-	160373545	160374196	upstream	NM_153187	SLC22A1	solute carrier family 22 member 1 isoform b	-3.99768	-1.99916	3.99768	down	chr6	+	160542862	160579750
NR_026655	FLJ12825	-2.2495	-1.1696	2.2495	down	RefSeq_NR	3942	chr12	+	54452037	54516018	downstream	NM_015481	ZNF385A	zinc finger protein 385A isoform c	-2.95098	-1.56119	2.95098	down	chr12	-	54762919	54778481
ENST00000513381	RP11-834C11.5	-3.73194	-1.89993	3.73194	down	Ensembl	499	chr12	-	54478915	54519614	upstream	NM_015481	ZNF385A	zinc finger protein 385A isoform c	-2.95098	-1.56119	2.95098	down	chr12	-	54762919	54778481
uc001wkc.1	AX746599	-4.14585	-2.05167	4.14585	down	UCSC_knowngene	2524	chr14	+	23982557	24013485	upstream	NM_020834	HOMEZ	homeobox and leucine zipper protein Homez	-2.07132	-1.05055	2.07132	down	chr14	-	23742843	23755309
uc009wxq.1	BC039493	-2.35939	-1.23841	2.35939	down	UCSC_knowngene	538	chr1	+	181143619	181151340	upstream	NM_016545	IER5	immediate early response gene 5 protein	5.93183	2.56848	5.93183	up	chr1	+	181057637	181059979
chr1:181081092-181121244+	lincRNA-CACNA1E-3	-3.67273	-1.87685	3.67273	down	lincRNA	40153	chr1	+	181081092	181121244	upstream	NM_016545	IER5	immediate early response gene 5 protein	5.93183	2.56848	5.93183	up	chr1	+	181057637	181059979
ENST00000456771	RP11-540K16.2	-5.1397	-2.36168	5.1397	down	Ensembl	532	chr1	-	181159606	181160285	downstream	NM_016545	IER5	immediate early response gene 5 protein	5.93183	2.56848	5.93183	up	chr1	+	181057637	181059979
chr16:84296674-84307824-	lincRNA-KCNG4	-2.35568	-1.23615	2.35568	down	lincRNA	11151	chr16	-	84296674	84307824	upstream	NM_021197	WFDC1	WAP four-disulfide core domain protein 1	4.18961	2.06681	4.18961	up	chr16	+	84328400	84363450
uc010qus.1	EU250747	-2.45591	-1.29626	2.45591	down	UCSC_knowngene	2229	chr10	-	131862603	131909081	downstream	NM_002412	MGMT	methylated-DNA--protein-cysteine	2.10491	1.07376	2.10491	up	chr10	+	131265453	131565783
CN412465	lincRNA-FGD2	-2.78681	-1.47861	2.78681	down	lincRNA	563	chr6	-	37103028	37103592	downstream	NM_153370	PI16	peptidase inhibitor 16 precursor	-2.31983	-1.21402	2.31983	down	chr6	+	36922208	36932613
ENST00000429327	BX322559.2	-3.76615	-1.91309	3.76615	down	Ensembl	192	chr21	-	46796105	46796297	upstream	NM_030582	COL18A1	collagen alpha-1(XVIII) chain isoform 1	-2.13721	-1.09573	2.13721	down	chr21	+	46875423	46933634
BQ185896	lincRNA-NPAS4	-2.49643	-1.31987	2.49643	down	lincRNA	555	chr11	+	66177770	66184608	downstream	NM_005125	CCS	copper chaperone for superoxide dismutase	2.08436	1.0596	2.08436	up	chr11	+	66360689	66373490
AW129555	lincRNA-DEPTOR-2	-3.67622	-1.87822	3.67622	down	lincRNA	380	chr8	-	121073763	121074142	downstream	NM_022783	DEPTOR	DEP domain-containing mTOR-interacting protein	-2.04759	-1.03392	2.04759	down	chr8	+	120885899	121063157
ENST00000505358	AC004611.1	-2.37439	-1.24756	2.37439	down	Ensembl	1207	chr19	+	5558184	5581226	downstream	NM_001134316	PRR22	proline-rich protein 22	2.68193	1.42327	2.68193	up	chr19	-	5782970	5784776
ENST00000479610	RP11-59J16.2	-2.55377	-1.35263	2.55377	down	Ensembl	697	chr3	+	127208395	127209630	downstream	NM_172027	ABTB1	ankyrin repeat and BTB/POZ domain-containing	-2.2811	-1.18973	2.2811	down	chr3	+	127391780	127399769
ENST00000479610	RP11-59J16.2	-2.55377	-1.35263	2.55377	down	Ensembl	697	chr3	+	127208395	127209630	downstream	NM_004526	MCM2	DNA replication licensing factor MCM2	2.29271	1.19706	2.29271	up	chr3	+	127317252	127341278
DB078790	lincRNA-EBF2-1	-3.21144	-1.68322	3.21144	down	lincRNA	568	chr8	-	26047433	26047981	upstream	NM_004331	BNIP3L	BCL2/adenovirus E1B 19 kDa protein-interacting	2.4533	1.29472	2.4533	up	chr8	+	26240522	26270644
chr7:1348449-1366599+	lincRNA-MICALL2	-3.84884	-1.94442	3.84884	down	lincRNA	18151	chr7	+	1348449	1366599	upstream	NM_138445	GPR146	probable G-protein coupled receptor 146	6.17377	2.62615	6.17377	up	chr7	+	1097140	1098897
AK304777	lincRNA-FBLN2-2	9.7992	3.29266	9.7992	up	lincRNA	3873	chr3	+	13573823	13679512	upstream	NM_024923	NUP210	nuclear pore membrane glycoprotein 210	-2.82906	-1.50032	2.82906	down	chr3	-	13357736	13461809
AW274645	lincRNA-PPP2R5C-1	-2.6318	-1.39605	2.6318	down	lincRNA	367	chr14	-	102415403	102416162	downstream	NM_178587	PPP2R5C	serine/threonine-protein phosphatase 2A 56 kDa	2.47054	1.30483	2.47054	up	chr14	+	102276139	102378962
AK131566	lincRNA-NR4A1	3.1354	1.64865	3.1354	up	lincRNA	3513	chr12	+	52431498	52453285	downstream	NM_005556	KRT7	keratin, type II cytoskeletal 7	-3.89643	-1.96215	3.89643	down	chr12	+	52626953	52642709
chr2:223964483-223968702-	lincRNA-KCNE4-1	-2.83406	-1.50287	2.83406	down	lincRNA	4220	chr2	-	223964483	223968702	downstream	NM_203372	ACSL3	long-chain-fatty-acid--CoA ligase 3	-2.29126	-1.19614	2.29126	down	chr2	+	223725731	223808119
AF191495	lincRNA-F11R	-2.07024	-1.0498	2.07024	down	lincRNA	2187	chr1	-	160967605	161008711	upstream	NM_001035513	SDHC	succinate dehydrogenase cytochrome b560 subunit,	-2.34508	-1.22964	2.34508	down	chr1	+	161284165	161334535
uc003wyp.1	CR613267	-2.58262	-1.36883	2.58262	down	UCSC_knowngene	2275	chr8	+	17942376	17955126	upstream	NM_177924	ASAH1	acid ceramidase isoform a preproprotein	-2.00528	-1.0038	2.00528	down	chr8	-	17913924	17941879
ENST00000513381	RP11-834C11.5	-3.73194	-1.89993	3.73194	down	Ensembl	499	chr12	-	54478915	54519614	downstream	NM_014620	HOXC4	homeobox protein Hox-C4	-2.90838	-1.54021	2.90838	down	chr12	+	54410641	54449814
NR_026655	FLJ12825	-2.2495	-1.1696	2.2495	down	RefSeq_NR	3942	chr12	+	54452037	54516018	upstream	NM_014620	HOXC4	homeobox protein Hox-C4	-2.90838	-1.54021	2.90838	down	chr12	+	54410641	54449814
AW418755	lincRNA-APLF	-2.45954	-1.29839	2.45954	down	lincRNA	635	chr2	-	68855011	68857996	upstream	NM_014482	BMP10	bone morphogenetic protein 10 preproprotein	-2.28387	-1.19148	2.28387	down	chr2	-	69092612	69098649
AK055958		4.44448	2.15202	4.44448	up	misc_RNA	2041	chr14	-	91314205	91316246	upstream	NM_001102367	C14orf159	hypothetical protein LOC80017 isoform a	-2.74247	-1.45548	2.74247	down	chr14	+	91580978	91691703
DA330754	lincRNA-TMSB10	-2.41444	-1.27169	2.41444	down	lincRNA	558	chr2	-	85191205	85192095	downstream	NM_021103	TMSB10	thymosin beta-10	2.08106	1.05732	2.08106	up	chr2	+	85132762	85133799
ENST00000425071	AC010082.1	-2.32067	-1.21454	2.32067	down	Ensembl	471	chr7	+	18191397	18367235	downstream	NM_014707	HDAC9	histone deacetylase 9 isoform 3	4.65313	2.2182	4.65313	up	chr7	+	18535368	18708465
chr14:25152560-25164885-	lincRNA-GZMB	-2.25171	-1.17102	2.25171	down	lincRNA	12326	chr14	-	25152560	25164885	downstream	NM_015299	KHNYN	protein KHNYN	3.10823	1.63609	3.10823	up	chr14	+	24899140	24910547
ENST00000411804	RP1-91G5.3	-2.06718	-1.04766	2.06718	down	Ensembl	707	chr1	+	152346429	152417932	downstream	NM_001024679	C1orf68	skin-specific protein 32	-2.31789	-1.21281	2.31789	down	chr1	+	152691997	152692905
AA164863	lincRNA-TMEM9	-2.72997	-1.44889	2.72997	down	lincRNA	472	chr1	-	201142621	201143091	downstream	NM_017596	KIF21B	kinesin-like protein KIF21B	7.58585	2.92331	7.58585	up	chr1	-	200938519	200992828
AK095707		4.29867	2.10389	4.29867	up	misc_RNA	2984	chr16	+	81421429	81424413	downstream	NM_198390	CMIP	C-Maf-inducing protein isoform C-mip	-2.5542	-1.35287	2.5542	down	chr16	+	81478774	81745367
DA922283	lincRNA-TH	-2.01422	-1.01022	2.01422	down	lincRNA	568	chr11	-	2229882	2230451	upstream	NM_005706	TSSC4	protein TSSC4	2.08189	1.05789	2.08189	up	chr11	+	2423522	2425106
ENST00000421191	XXbac-BPG248L24.10	3.16893	1.664	3.16893	up	Ensembl	306	chr6	-	31275591	31276326	downstream	NM_014068	PSORS1C1	psoriasis susceptibility 1 candidate 1	3.37371	1.75433	3.37371	up	chr6	+	31082607	31107869
BX537809		-2.04389	-1.03132	2.04389	down	misc_RNA	1733	chr11	-	104599707	104601095	upstream	NM_033306	CASP4	caspase-4 isoform gamma precursor	-2.02563	-1.01837	2.02563	down	chr11	-	104813593	104827422
AK124936	lincRNA-FAM47E	2.05308	1.03779	2.05308	up	lincRNA	1624	chr4	+	77135192	77204933	upstream	NM_001130016	ART3	ecto-ADP-ribosyltransferase 3 isoform a	-2.46919	-1.30404	2.46919	down	chr4	+	76995862	77033955
CR749802	lincRNA-MBNL2-1	2.80009	1.48547	2.80009	up	lincRNA	4571	chr13	+	97794089	98046372	downstream	NM_021033	RAP2A	ras-related protein Rap-2a precursor	3.07208	1.61922	3.07208	up	chr13	+	98086474	98120252
chrX:118607438-118617354+	lincRNA-CXorf56-3	-2.06217	-1.04417	2.06217	down	lincRNA	9917	chrX	+	118607438	118617354	upstream	NM_001152	SLC25A5	ADP/ATP translocase 2	-3.09543	-1.63014	3.09543	down	chrX	+	118602362	118605359
DA088898	lincRNA-INCENP	-2.9769	-1.57381	2.9769	down	lincRNA	560	chr11	+	61740183	61740743	downstream	NM_006551	SCGB1D2	secretoglobin family 1D member 2 precursor	-2.58249	-1.36876	2.58249	down	chr11	+	62009723	62012280
AK296262	lincRNA-PTEN-1	-2.74882	-1.45881	2.74882	down	lincRNA	1121	chr10	-	89892056	90343015	downstream	NM_000314	PTEN	phosphatidylinositol-3,4,5-trisphosphate	3.71251	1.8924	3.71251	up	chr10	+	89623194	89728532
NR_026655	FLJ12825	-2.2495	-1.1696	2.2495	down	RefSeq_NR	3942	chr12	+	54452037	54516018	upstream	NM_017409	HOXC10	homeobox protein Hox-C10	2.01367	1.00983	2.01367	up	chr12	+	54378945	54384062
ENST00000513381	RP11-834C11.5	-3.73194	-1.89993	3.73194	down	Ensembl	499	chr12	-	54478915	54519614	downstream	NM_017409	HOXC10	homeobox protein Hox-C10	2.01367	1.00983	2.01367	up	chr12	+	54378945	54384062
DA706379	lincRNA-C1QTNF4	-2.76829	-1.469	2.76829	down	lincRNA	574	chr11	-	47629926	47630498	downstream	NM_001128225	SLC39A13	zinc transporter ZIP13 isoform a	2.46047	1.29893	2.46047	up	chr11	+	47430045	47438051
ENST00000428947	AP001187.11	-2.2627	-1.17805	2.2627	down	Ensembl	411	chr11	+	64649006	64649417	downstream	NM_080668	CDCA5	sororin	-2.21215	-1.14545	2.21215	down	chr11	-	64844926	64851615
AK096322	lincRNA-FBRS	5.0325	2.33128	5.0325	up	lincRNA	2890	chr16	+	30671242	30682130	downstream	NM_152288	ORAI3	protein orai-3	3.46765	1.79396	3.46765	up	chr16	+	30960404	30966259
ENST00000452496	ASS1P12	-12.8498	-3.68368	12.8498	down	Ensembl	1227	chr9	+	32945993	32947220	downstream	NM_018225	SMU1	WD40 repeat-containing protein SMU1	2.19535	1.13445	2.19535	up	chr9	-	33041849	33076714
BX112397	lincRNA-FAM183A-2	-2.51719	-1.33182	2.51719	down	lincRNA	753	chr1	+	43464813	43465491	upstream	NM_001146289	LEPRE1	prolyl 3-hydroxylase 1 isoform 2	2.8462	1.50904	2.8462	up	chr1	-	43212005	43232755
chr17:55283426-55307276+	lincRNA-MSI2	-5.39812	-2.43246	5.39812	down	lincRNA	23851	chr17	+	55283426	55307276	downstream	NM_170721	MSI2	RNA-binding protein Musashi homolog 2 isoform b	-3.66504	-1.87383	3.66504	down	chr17	+	55334373	55710544
NR_024279	FLJ37453	2.97473	1.57276	2.97473	up	RefSeq_NR	2732	chr1	-	16160709	16174642	downstream	NM_015164	PLEKHM2	pleckstrin homology domain-containing family M	4.33583	2.11631	4.33583	up	chr1	+	16010826	16061264
AA457263	lincRNA-GPR61	-2.12129	-1.08494	2.12129	down	lincRNA	451	chr1	+	110072368	110072818	downstream	NM_000849	GSTM3	glutathione S-transferase Mu 3	-3.3207	-1.73149	3.3207	down	chr1	-	110276553	110283660
ENST00000412736	MEG3	-2.11858	-1.0831	2.11858	down	Ensembl	1670	chr14	+	101292454	101327308	upstream	NM_024515	WDR25	WD repeat-containing protein 25	-2.48638	-1.31405	2.48638	down	chr14	+	100842832	100996640
uc002bnt.2	LOC254559	-2.40143	-1.26389	2.40143	down	UCSC_knowngene	4778	chr15	+	89904809	89941718	downstream	NM_016321	RHCG	ammonium transporter Rh type C	-80.1055	-6.32383	80.1055	down	chr15	-	90014637	90039799
AK096322	lincRNA-FBRS	5.0325	2.33128	5.0325	up	lincRNA	2890	chr16	+	30671242	30682130	upstream	NM_024031	PRR14	proline-rich protein 14	2.31232	1.20934	2.31232	up	chr16	+	30662240	30667734
AL049252		-3.04995	-1.60879	3.04995	down	NRED	3343	chr6	-	30268570	30271892	downstream	NM_033229	TRIM15	tripartite motif-containing protein 15	2.12188	1.08534	2.12188	up	chr6	+	30130982	30140473
NR_024053	HCG18	-2.06815	-1.04834	2.06815	down	RefSeq_NR	6600	chr6	-	30255173	30294927	downstream	NM_033229	TRIM15	tripartite motif-containing protein 15	2.12188	1.08534	2.12188	up	chr6	+	30130982	30140473
chr11:102425615-102440915+	lincRNA-MMP20	-2.61987	-1.3895	2.61987	down	lincRNA	15301	chr11	+	102425615	102440915	upstream	NM_182962	BIRC3	baculoviral IAP repeat-containing protein 3	-2.12216	-1.08553	2.12216	down	chr11	+	102188193	102208465
BF950033	lincRNA-ARID1A	-2.30689	-1.20595	2.30689	down	lincRNA	283	chr1	+	26948061	26948325	upstream	NM_002953	RPS6KA1	ribosomal protein S6 kinase alpha-1 isoform a	-2.00699	-1.00503	2.00699	down	chr1	+	26856248	26901520
ENST00000505910	RP11-723O4.3	-2.12666	-1.08859	2.12666	down	Ensembl	329	chr3	+	128588466	128588869	upstream	NM_002950	RPN1	dolichyl-diphosphooligosaccharide--protein	-2.58961	-1.37274	2.58961	down	chr3	-	128338812	128369719
AK131566	lincRNA-NR4A1	3.1354	1.64865	3.1354	up	lincRNA	3513	chr12	+	52431498	52453285	upstream	NM_001077401	ACVRL1	serine/threonine-protein kinase receptor R3	-3.37547	-1.75509	3.37547	down	chr12	+	52306112	52317145
uc001znn.1	LOC729082	-2.89386	-1.533	2.89386	down	UCSC_knowngene	1379	chr15	+	41576200	41601901	downstream	NM_006293	TYRO3	tyrosine-protein kinase receptor TYRO3	-4.14592	-2.05169	4.14592	down	chr15	+	41851219	41871536
NR_026757	LOC729082	2.31453	1.21072	2.31453	up	RefSeq_NR	1894	chr15	+	41576200	41591794	downstream	NM_006293	TYRO3	tyrosine-protein kinase receptor TYRO3	-4.14592	-2.05169	4.14592	down	chr15	+	41851219	41871536
AW167909	lincRNA-WRNIP1	-4.0185	-2.00666	4.0185	down	lincRNA	518	chr6	-	2812462	2812980	upstream	NM_000904	NQO2	ribosyldihydronicotinamide dehydrogenase	-2.99361	-1.58189	2.99361	down	chr6	+	3000066	3019994
AK096322	lincRNA-FBRS	5.0325	2.33128	5.0325	up	lincRNA	2890	chr16	+	30671242	30682130	downstream	NM_001080417	ZNF629	zinc finger protein 629	2.94679	1.55915	2.94679	up	chr16	-	30789769	30798523
CR611332		2.05767	1.04101	2.05767	up	misc_RNA	2122	chr5	+	139496842	139498964	downstream	NM_001007189	C5orf53	IgA-inducing protein homolog precursor	2.44511	1.2899	2.44511	up	chr5	+	139505520	139508391
ENST00000428947	AP001187.11	-2.2627	-1.17805	2.2627	down	Ensembl	411	chr11	+	64649006	64649417	upstream	NM_201997	SF1	splicing factor 1 isoform 4	-2.25187	-1.17113	2.25187	down	chr11	-	64532075	64546316
CV315884	lincRNA-ZNF652	-2.22485	-1.15371	2.22485	down	lincRNA	244	chr17	+	47338132	47338356	upstream	NM_001135186	ABI3	ABI gene family member 3 isoform 2	7.22511	2.85302	7.22511	up	chr17	+	47287588	47300587
chr16:84296674-84307824-	lincRNA-KCNG4	-2.35568	-1.23615	2.35568	down	lincRNA	11151	chr16	-	84296674	84307824	downstream	NM_019065	NECAB2	N-terminal EF-hand calcium-binding protein 2	-3.86379	-1.95002	3.86379	down	chr16	+	84002236	84036379
AK096322	lincRNA-FBRS	5.0325	2.33128	5.0325	up	lincRNA	2890	chr16	+	30671242	30682130	overlap	NM_001105079	FBRS	probable fibrosin-1	4.12387	2.044	4.12387	up	chr16	+	30675777	30682131
ENST00000505358	AC004611.1	-2.37439	-1.24756	2.37439	down	Ensembl	1207	chr19	+	5558184	5581226	downstream	NM_015414	RPL36	60S ribosomal protein L36	-2.90997	-1.541	2.90997	down	chr19	+	5690345	5691678
BQ185896	lincRNA-NPAS4	-2.49643	-1.31987	2.49643	down	lincRNA	555	chr11	+	66177770	66184608	upstream	NM_020404	CD248	endosialin precursor	6.42941	2.68469	6.42941	up	chr11	-	66081957	66084515
AF083120		-2.76941	-1.46958	2.76941	down	misc_RNA	158	chr11	+	62321164	62321291	downstream	NM_173810	TTC9C	tetratricopeptide repeat protein 9C	2.06545	1.04645	2.06545	up	chr11	+	62495951	62506108
AK124257		2.20463	1.14054	2.20463	up	misc_RNA	2362	chr7	-	140423814	140426175	downstream	NM_004546	NDUFB2	NADH dehydrogenase [ubiquinone] 1 beta	-2.04214	-1.03008	2.04214	down	chr7	+	140396480	140406446
ENST00000505358	AC004611.1	-2.37439	-1.24756	2.37439	down	Ensembl	1207	chr19	+	5558184	5581226	downstream	NM_198705	HSD11B1L	hydroxysteroid 11-beta-dehydrogenase 1-like	-2.61768	-1.38829	2.61768	down	chr19	+	5681034	5688533
BX953928	lincRNA-DOK2	-5.80451	-2.53717	5.80451	down	lincRNA	442	chr8	+	21714378	21714822	downstream	NM_022749	FAM160B2	retinoic acid induced 16	2.75001	1.45943	2.75001	up	chr8	+	21946713	21961891
DB030353	lincRNA-RPUSD4-2	-3.21249	-1.68369	3.21249	down	lincRNA	613	chr11	+	125976772	125977385	downstream	NM_006278	ST3GAL4	CMP-N-acetylneuraminate-beta-galactosamide-	-2.0576	-1.04096	2.0576	down	chr11	+	126226095	126284533
chr5:171107070-171142645+	lincRNA-FBXW11-3	-2.36313	-1.2407	2.36313	down	lincRNA	35576	chr5	+	171107070	171142645	upstream	NM_001037738	NPM1	nucleophosmin isoform 3	2.78935	1.47993	2.78935	up	chr5	+	170814707	170833731
uc003eoc.1	BC043572	-3.45084	-1.78695	3.45084	down	UCSC_knowngene	1768	chr3	-	131044145	131100319	upstream	NM_001171905	NUDT16	U8 snoRNA-decapping enzyme isoform 3	-2.56631	-1.35969	2.56631	down	chr3	+	131100514	131107674
ENST00000442418	RP11-86H7.1	-3.39489	-1.76337	3.39489	down	Ensembl	748	chr1	-	95104016	95285652	downstream	NM_001993	F3	tissue factor isoform 1 precursor	-3.26816	-1.70848	3.26816	down	chr1	-	94994731	95007413
uc001dqu.2	BC030750	-2.53452	-1.34171	2.53452	down	UCSC_knowngene	1327	chr1	-	95123089	95285834	downstream	NM_001993	F3	tissue factor isoform 1 precursor	-3.26816	-1.70848	3.26816	down	chr1	-	94994731	95007413
exon847+	lincRNA-ZW10	-4.05083	-2.01822	4.05083	down	lincRNA	440	chr11	+	113591786	113592225	downstream	NM_001161772	HTR3A	5-hydroxytryptamine receptor 3A isoform c	2.21611	1.14803	2.21611	up	chr11	+	113848221	113861034
exon848+	lincRNA-ZW10	-3.69946	-1.88732	3.69946	down	lincRNA	153	chr11	+	113592424	113592576	downstream	NM_001161772	HTR3A	5-hydroxytryptamine receptor 3A isoform c	2.21611	1.14803	2.21611	up	chr11	+	113848221	113861034
AF083120		-2.76941	-1.46958	2.76941	down	misc_RNA	158	chr11	+	62321164	62321291	downstream	NM_000327	ROM1	rod outer segment membrane protein 1	2.32721	1.2186	2.32721	up	chr11	+	62380212	62382592
AK131566	lincRNA-NR4A1	3.1354	1.64865	3.1354	up	lincRNA	3513	chr12	+	52431498	52453285	upstream	NM_181711	GRASP	general receptor for phosphoinositides	15.4143	3.9462	15.4143	up	chr12	+	52400747	52409671
chr6:13349175-13352025-	lincRNA-TBC1D7	-2.63659	-1.39867	2.63659	down	lincRNA	2851	chr6	-	13349175	13352025	upstream	NM_018988	GFOD1	glucose-fructose oxidoreductase	9.54025	3.25403	9.54025	up	chr6	-	13363818	13487787
AF191495	lincRNA-F11R	-2.07024	-1.0498	2.07024	down	lincRNA	2187	chr1	-	160967605	161008711	upstream	NM_004106	FCER1G	high affinity immunoglobulin epsilon receptor	4.3761	2.12965	4.3761	up	chr1	+	161185086	161189038
chr5:171107070-171142645+	lincRNA-FBXW11-3	-2.36313	-1.2407	2.36313	down	lincRNA	35576	chr5	+	171107070	171142645	upstream	NM_199185	NPM1	nucleophosmin isoform 2	2.3605	1.23909	2.3605	up	chr5	+	170814707	170837888
uc003nih.2	BC033330	-3.25934	-1.70458	3.25934	down	UCSC_knowngene	2883	chr6	+	26569551	26574925	upstream	NM_006994	BTN3A3	butyrophilin subfamily 3 member A3 isoform a	-2.54708	-1.34885	2.54708	down	chr6	+	26440699	26453643
ENST00000428947	AP001187.11	-2.2627	-1.17805	2.2627	down	Ensembl	411	chr11	+	64649006	64649417	upstream	NM_201995	SF1	splicing factor 1 isoform 2	-3.34492	-1.74197	3.34492	down	chr11	-	64532075	64546316
uc002qsa.2	LOC113386	2.14223	1.09911	2.14223	up	UCSC_knowngene	1396	chr19	+	58816739	58827011	upstream	NM_001164530	ZNF135	zinc finger protein 135 isoform 5	-2.18149	-1.12532	2.18149	down	chr19	+	58570606	58581110
CD000492	lincRNA-WISP3-2	-6.65571	-2.73459	6.65571	down	lincRNA	304	chr6	+	112311747	112312016	downstream	NM_001105206	LAMA4	laminin subunit alpha-4 isoform 1 precursor	8.25304	3.04492	8.25304	up	chr6	-	112429133	112575828
ENST00000420156	RP4-543J13.1	-2.44985	-1.29269	2.44985	down	Ensembl	332	chr1	+	114749048	114804900	upstream	NM_020190	OLFML3	olfactomedin-like protein 3 precursor	4.36409	2.12568	4.36409	up	chr1	+	114522029	114524875
AF083120		-2.76941	-1.46958	2.76941	down	misc_RNA	158	chr11	+	62321164	62321291	upstream	NM_025080	ASRGL1	L-asparaginase	-2.54703	-1.34882	2.54703	down	chr11	+	62104773	62160887
uc001wkc.1	AX746599	-4.14585	-2.05167	4.14585	down	UCSC_knowngene	2524	chr14	+	23982557	24013485	downstream	NM_032452	JPH4	junctophilin-4	-2.14464	-1.10073	2.14464	down	chr14	-	24037243	24048009
ENST00000421191	XXbac-BPG248L24.10	3.16893	1.664	3.16893	up	Ensembl	306	chr6	-	31275591	31276326	upstream	NM_001011700	MCCD1	mitochondrial coiled-coil domain protein 1	-41.4071	-5.37181	41.4071	down	chr6	+	31496738	31498008
AA564591	lincRNA-PPYR1-2	-5.29059	-2.40343	5.29059	down	lincRNA	385	chr10	+	46744329	47220766	upstream	NM_001042387	PTPN20A	tyrosine-protein phosphatase non-receptor type	-2.04011	-1.02865	2.04011	down	chr10	-	46550122	46641003
CU692690	lincRNA-TNFRSF13C	-2.07451	-1.05277	2.07451	down	lincRNA	1342	chr22	+	42120333	42423168	downstream	NM_001002034	FAM109B	sesquipedalian-2	3.76824	1.91389	3.76824	up	chr22	+	42470254	42475442
NR_026757	LOC729082	2.31453	1.21072	2.31453	up	RefSeq_NR	1894	chr15	+	41576200	41591794	upstream	NM_007236	CHP	calcium-binding protein p22	-2.2859	-1.19276	2.2859	down	chr15	+	41523436	41574083
uc001znn.1	LOC729082	-2.89386	-1.533	2.89386	down	UCSC_knowngene	1379	chr15	+	41576200	41601901	upstream	NM_007236	CHP	calcium-binding protein p22	-2.2859	-1.19276	2.2859	down	chr15	+	41523436	41574083
ENST00000421191	XXbac-BPG248L24.10	3.16893	1.664	3.16893	up	Ensembl	306	chr6	-	31275591	31276326	upstream	NM_001177519	MICA	MHC class I polypeptide-related sequence A	3.36276	1.74964	3.36276	up	chr6	+	31371370	31383090
AF083120		-2.76941	-1.46958	2.76941	down	misc_RNA	158	chr11	+	62321164	62321291	upstream	NM_024060	AHNAK	neuroblast differentiation-associated protein	5.27553	2.39932	5.27553	up	chr11	-	62201015	62314332
NR_024383	LOC645323	-2.20143	-1.13844	2.20143	down	RefSeq_NR	3360	chr5	-	87960263	87974262	upstream	NM_001131005	MEF2C	myocyte-specific enhancer factor 2C isoform 2	-2.63849	-1.39971	2.63849	down	chr5	-	88014057	88199922
AW075897	lincRNA-SIN3A	-2.50948	-1.32739	2.50948	down	lincRNA	521	chr15	-	75750735	75751256	downstream	NM_015492	C15orf39	hypothetical protein LOC56905	3.76974	1.91446	3.76974	up	chr15	+	75494220	75504510
ENST00000513381	RP11-834C11.5	-3.73194	-1.89993	3.73194	down	Ensembl	499	chr12	-	54478915	54519614	downstream	NM_004503	HOXC6	homeobox protein Hox-C6 isoform 1	-3.93457	-1.97621	3.93457	down	chr12	+	54422193	54424607
NR_026655	FLJ12825	-2.2495	-1.1696	2.2495	down	RefSeq_NR	3942	chr12	+	54452037	54516018	upstream	NM_004503	HOXC6	homeobox protein Hox-C6 isoform 1	-3.93457	-1.97621	3.93457	down	chr12	+	54422193	54424607
CV315884	lincRNA-ZNF652	-2.22485	-1.15371	2.22485	down	lincRNA	244	chr17	+	47338132	47338356	downstream	NM_002507	NGFR	tumor necrosis factor receptor superfamily	5.97895	2.57989	5.97895	up	chr17	+	47572654	47592382
AW269809	lincRNA-KPNA1	-3.15719	-1.65864	3.15719	down	lincRNA	382	chr3	-	122233924	122236198	upstream	NM_001146106	PARP9	poly [ADP-ribose] polymerase 9 isoform c	4.52381	2.17754	4.52381	up	chr3	-	122250619	122283194
ENST00000513381	RP11-834C11.5	-3.73194	-1.89993	3.73194	down	Ensembl	499	chr12	-	54478915	54519614	downstream	NM_153693	HOXC6	homeobox protein Hox-C6 isoform 2	-4.13564	-2.04811	4.13564	down	chr12	+	54410641	54424607
NR_026655	FLJ12825	-2.2495	-1.1696	2.2495	down	RefSeq_NR	3942	chr12	+	54452037	54516018	upstream	NM_153693	HOXC6	homeobox protein Hox-C6 isoform 2	-4.13564	-2.04811	4.13564	down	chr12	+	54410641	54424607
AK304777	lincRNA-FBLN2-2	9.7992	3.29266	9.7992	up	lincRNA	3873	chr3	+	13573823	13679512	upstream	NM_024827	HDAC11	histone deacetylase 11 isoform 1	2.23368	1.15942	2.23368	up	chr3	+	13521714	13547924
AK131566	lincRNA-NR4A1	3.1354	1.64865	3.1354	up	lincRNA	3513	chr12	+	52431498	52453285	downstream	NM_001098673	C12orf44	autophagy-related protein 101	2.41425	1.27157	2.41425	up	chr12	+	52463757	52471279
DA728743	lincRNA-FOXA1	-2.0756	-1.05353	2.0756	down	lincRNA	789	chr14	-	38503496	38663486	upstream	NM_175060	CLEC14A	C-type lectin domain family 14 member A	8.16429	3.02933	8.16429	up	chr14	-	38723318	38725574
Y00062	lincRNA-ATP6V1G3-2	7.4623	2.89962	7.4623	up	lincRNA	4597	chr1	+	198284952	198726330	overlap	NM_080921	PTPRC	receptor-type tyrosine-protein phosphatase C	-2.35173	-1.23372	2.35173	down	chr1	+	198608136	198726545
ENST00000429469	RP11-553K8.2	-2.48419	-1.31277	2.48419	down	Ensembl	363	chr1	-	198566853	198567998	upstream	NM_080921	PTPRC	receptor-type tyrosine-protein phosphatase C	-2.35173	-1.23372	2.35173	down	chr1	+	198608136	198726545
uc001nnk.1	AB231722	-2.56049	-1.35642	2.56049	down	UCSC_knowngene	158	chr11	+	58746331	58746843	upstream	NM_080661	GLYATL1	glycine N-acyltransferase-like protein 1 isoform	-3.49954	-1.80716	3.49954	down	chr11	+	58710721	58724516
BC050642	lincRNA-ENO1-1	2.15996	1.111	2.15996	up	lincRNA	1898	chr1	-	8921062	9288096	upstream	NM_004285	H6PD	GDH/6PGL endoplasmic bifunctional protein	2.12303	1.08613	2.12303	up	chr1	+	9294862	9331394
NR_028408	LOC400027	2.09403	1.06628	2.09403	up	RefSeq_NR	2202	chr12	-	46119502	46121704	downstream	NM_001142680	ANO6	anoctamin-6 isoform c	-2.03875	-1.02768	2.03875	down	chr12	+	45609875	45834187
uc001stu.2	BC035381	-3.52286	-1.81675	3.52286	down	UCSC_knowngene	3099	chr12	-	68102828	68123221	downstream	NM_006482	DYRK2	dual specificity	-3.39727	-1.76437	3.39727	down	chr12	+	68042511	68056444
NR_002578	GAS5	2.35647	1.23663	2.35647	up	RefSeq_NR	651	chr1	-	173833039	173837125	downstream	NM_014458	KLHL20	kelch-like protein 20	-3.77514	-1.91653	3.77514	down	chr1	+	173684079	173755840
AF191495	lincRNA-F11R	-2.07024	-1.0498	2.07024	down	lincRNA	2187	chr1	-	160967605	161008711	downstream	NM_001033667	LY9	T-lymphocyte surface antigen Ly-9 isoform b	-2.05471	-1.03893	2.05471	down	chr1	+	160765927	160772483
uc003yed.2	CR590356	-2.03272	-1.02341	2.03272	down	UCSC_knowngene	1430	chr8	-	90729655	90769797	upstream	NM_003821	RIPK2	receptor-interacting serine/threonine-protein	2.34924	1.2322	2.34924	up	chr8	+	90769974	90803292
BM676747	lincRNA-DCT	-2.2717	-1.18377	2.2717	down	lincRNA	348	chr13	-	95166133	95166457	downstream	NM_005708	GPC6	glypican-6 precursor	3.59387	1.84554	3.59387	up	chr13	+	93879077	95060273
CR611332		2.05767	1.04101	2.05767	up	misc_RNA	2122	chr5	+	139496842	139498964	overlap	NM_005859	PURA	transcriptional activator protein Pur-alpha	2.74223	1.45535	2.74223	up	chr5	+	139493707	139499001
CA442294	lincRNA-PARD3	-2.34783	-1.23133	2.34783	down	lincRNA	693	chr10	+	33653361	33654040	upstream	NM_001024629	NRP1	neuropilin-1 isoform c	4.53597	2.18141	4.53597	up	chr10	-	33486546	33623833
AW075897	lincRNA-SIN3A	-2.50948	-1.32739	2.50948	down	lincRNA	521	chr15	-	75750735	75751256	downstream	NM_024608	NEIL1	endonuclease 8-like 1	-2.59294	-1.37459	2.59294	down	chr15	+	75639330	75647588
AK124977	lincRNA-UNKL-2	2.99891	1.58444	2.99891	up	lincRNA	2638	chr16	-	1413205	1464704	upstream	NM_024600	TMEM204	transmembrane protein 204	8.4927	3.08622	8.4927	up	chr16	+	1584230	1605243
BX953928	lincRNA-DOK2	-5.80451	-2.53717	5.80451	down	lincRNA	442	chr8	+	21714378	21714822	downstream	NM_001114138	EPB49	dematin isoform 2	4.4577	2.1563	4.4577	up	chr8	+	21916685	21940036
ENST00000421191	XXbac-BPG248L24.10	3.16893	1.664	3.16893	up	Ensembl	306	chr6	-	31275591	31276326	upstream	NM_005007	NFKBIL1	NF-kappa-B inhibitor-like protein 1 isoform 1	-2.32758	-1.21883	2.32758	down	chr6	+	31515352	31526606
uc001wkc.1	AX746599	-4.14585	-2.05167	4.14585	down	UCSC_knowngene	2524	chr14	+	23982557	24013485	upstream	NM_004643	PABPN1	polyadenylate-binding protein 2	-21.6344	-4.43526	21.6344	down	chr14	+	23789396	23795394
ENST00000421191	XXbac-BPG248L24.10	3.16893	1.664	3.16893	up	Ensembl	306	chr6	-	31275591	31276326	upstream	NM_005514	HLA-B	major histocompatibility complex, class I, B	2.32767	1.21889	2.32767	up	chr6	-	31321648	31324989
chr1:13902316-13904644-	lincRNA-LRRC38	-2.45194	-1.29392	2.45194	down	lincRNA	2329	chr1	-	13902316	13904644	upstream	NM_012231	PRDM2	PR domain zinc finger protein 2 isoform a	-2.19373	-1.13339	2.19373	down	chr1	+	14031349	14151574
exon92-	lincRNA-DMBX1	-2.7199	-1.44355	2.7199	down	lincRNA	197	chr1	-	46992321	46992517	downstream	NM_003579	RAD54L	DNA repair and recombination protein RAD54-like	-2.17453	-1.1207	2.17453	down	chr1	+	46713366	46744145
exon95+	lincRNA-KNCN	-3.21857	-1.68642	3.21857	down	lincRNA	271	chr1	+	46997334	46997604	upstream	NM_003579	RAD54L	DNA repair and recombination protein RAD54-like	-2.17453	-1.1207	2.17453	down	chr1	+	46713366	46744145
CD000492	lincRNA-WISP3-2	-6.65571	-2.73459	6.65571	down	lincRNA	304	chr6	+	112311747	112312016	downstream	NM_001105208	LAMA4	laminin subunit alpha-4 isoform 3 precursor	8.96401	3.16414	8.96401	up	chr6	-	112574985	112575828
chr16:84296674-84307824-	lincRNA-KCNG4	-2.35568	-1.23615	2.35568	down	lincRNA	11151	chr16	-	84296674	84307824	downstream	NM_182980	OSGIN1	oxidative stress-induced growth inhibitor 1	-4.08656	-2.03089	4.08656	down	chr16	+	83982671	83999937
chr1:29096302-29111760-	lincRNA-YTHDF2	-2.86128	-1.51666	2.86128	down	lincRNA	15459	chr1	-	29096302	29111760	downstream	NM_152304	RAB42	putative Ras-related protein Rab-42 isoform 2	5.97817	2.5797	5.97817	up	chr1	+	28918711	28921088
BC009210	lincRNA-KIAA1199	4.49178	2.16729	4.49178	up	lincRNA	2959	chr15	-	81239669	81282169	upstream	NM_022566	MESDC1	mesoderm development candidate 1	2.10856	1.07626	2.10856	up	chr15	+	81293294	81296345
BX110954	lincRNA-ZNF572-1	-4.27289	-2.09521	4.27289	down	lincRNA	620	chr8	+	125860978	125862459	downstream	NM_173685	NSMCE2	E3 SUMO-protein ligase NSE2	2.57579	1.36502	2.57579	up	chr8	+	126104082	126379367
chr7:1348449-1366599+	lincRNA-MICALL2	-3.84884	-1.94442	3.84884	down	lincRNA	18151	chr7	+	1348449	1366599	downstream	NM_002360	MAFK	transcription factor MafK	3.12411	1.64345	3.12411	up	chr7	+	1570367	1582679
U66048		-2.31069	-1.20832	2.31069	down	NRED	2959	chrX	+	149128983	149131935	upstream	NM_001164415	HSFX2	heat shock transcription factor, X-linked	-3.77407	-1.91612	3.77407	down	chrX	+	148855725	148858528
ENST00000428294	RP3-449O17.1	-4.71005	-2.23574	4.71005	down	Ensembl	700	chr22	-	38731766	38794921	downstream	NM_001004426	PLA2G6	85 kDa calcium-independent phospholipase A2	-2.12832	-1.08972	2.12832	down	chr22	-	38507501	38577761
uc003nih.2	BC033330	-3.25934	-1.70458	3.25934	down	UCSC_knowngene	2883	chr6	+	26569551	26574925	upstream	NM_001145008	BTN3A1	butyrophilin subfamily 3 member A1 isoform c	3.18134	1.66964	3.18134	up	chr6	+	26402464	26415444
CU692690	lincRNA-TNFRSF13C	-2.07451	-1.05277	2.07451	down	lincRNA	1342	chr22	+	42120333	42423168	upstream	NM_001469	XRCC6	X-ray repair cross-complementing protein 6	2.02205	1.01582	2.02205	up	chr22	+	42017294	42060052
ENST00000359838	RP3-337D23.3	-2.6783	-1.42132	2.6783	down	Ensembl	453	chr6	+	147480060	147502128	downstream	NM_001127715	STXBP5	syntaxin-binding protein 5 isoform b	-2.16527	-1.11454	2.16527	down	chr6	+	147525507	147708707
chrX:118607438-118617354+	lincRNA-CXorf56-3	-2.06217	-1.04417	2.06217	down	lincRNA	9917	chrX	+	118607438	118617354	downstream	NM_001105576	ANKRD58	ankyrin repeat domain-containing protein 58	4.26456	2.0924	4.26456	up	chrX	+	118892575	118894165
BC028019	lincRNA-C9orf57	2.03372	1.02412	2.03372	up	lincRNA	3343	chr9	+	74526576	74600965	upstream	NM_001025780	FAM108B1	abhydrolase domain-containing protein FAM108B1	2.06848	1.04857	2.06848	up	chr9	-	74480067	74526148
ENST00000411804	RP1-91G5.3	-2.06718	-1.04766	2.06718	down	Ensembl	707	chr1	+	152346429	152417932	downstream	NM_178429	LCE2C	late cornified envelope protein 2C	-2.42538	-1.27821	2.42538	down	chr1	+	152647770	152649049
ENST00000509266	AC026979.1	-3.13418	-1.64809	3.13418	down	Ensembl	1967	chr8	-	30044816	30047775	upstream	NM_001008710	RBPMS	RNA-binding protein with multiple splicing	-3.06395	-1.61539	3.06395	down	chr8	+	30241943	30429734
AW274645	lincRNA-PPP2R5C-1	-2.6318	-1.39605	2.6318	down	lincRNA	367	chr14	-	102415403	102416162	upstream	NM_181291	WDR20	WD repeat-containing protein 20 isoform 1	2.93114	1.55146	2.93114	up	chr14	+	102606211	102690010
AK090904		4.43395	2.14859	4.43395	up	RNAdb	2547	chr4	+	128759331	128761879	downstream	NM_032239	LARP1B	la-related protein 1B isoform 3	3.38191	1.75784	3.38191	up	chr4	+	128982502	129030056
AK128052		2.0222	1.01593	2.0222	up	misc_RNA	3587	chr4	-	128761608	128765195	upstream	NM_032239	LARP1B	la-related protein 1B isoform 3	3.38191	1.75784	3.38191	up	chr4	+	128982502	129030056
BE439827	lincRNA-MAS1	-2.05816	-1.04136	2.05816	down	lincRNA	652	chr6	-	160373545	160374196	downstream	NM_152858	WTAP	pre-mRNA-splicing regulator WTAP isoform 2	3.70782	1.89057	3.70782	up	chr6	+	160148151	160170453
AK124977	lincRNA-UNKL-2	2.99891	1.58444	2.99891	up	lincRNA	2638	chr16	-	1413205	1464704	upstream	NM_001114331	CLCN7	H(+)/Cl(-) exchange transporter 7 isoform b	-2.32937	-1.21994	2.32937	down	chr16	-	1494934	1525085
DB239440	lincRNA-SLC7A13	-4.01902	-2.00684	4.01902	down	lincRNA	578	chr8	-	87229854	87333375	upstream	NM_007013	WWP1	NEDD4-like E3 ubiquitin-protein ligase WWP1	2.74479	1.4567	2.74479	up	chr8	+	87354993	87480178
uc003tbd.2	BC041636	2.26414	1.17896	2.26414	up	UCSC_knowngene	1130	chr7	-	30555927	30601744	upstream	NM_032222	FAM188B	hypothetical protein LOC84182	-2.54733	-1.34898	2.54733	down	chr7	+	30811032	30932002
uc010wkm.1	CR624169	-2.6231	-1.39127	2.6231	down	UCSC_knowngene	416	chr17	-	45128651	45129168	upstream	NM_001002841	MYL4	myosin light chain 4	-2.32044	-1.2144	2.32044	down	chr17	+	45286427	45301045
AK124977	lincRNA-UNKL-2	2.99891	1.58444	2.99891	up	lincRNA	2638	chr16	-	1413205	1464704	downstream	NM_003294	TPSAB1	tryptase alpha/beta-1 precursor	15.2861	3.93415	15.2861	up	chr16	+	1290677	1292555
AW167909	lincRNA-WRNIP1	-4.0185	-2.00666	4.0185	down	lincRNA	518	chr6	-	2812462	2812980	downstream	NM_020135	WRNIP1	ATPase WRNIP1 isoform 1	2.32386	1.21652	2.32386	up	chr6	+	2765665	2785979
ENST00000423122	RP11-65J3.1	-2.35478	-1.23559	2.35478	down	Ensembl	545	chr9	+	132104121	132121817	upstream	NM_203434	IER5L	immediate early response gene 5-like protein	4.68279	2.22737	4.68279	up	chr9	-	131937830	131940540
uc004bxu.2	BC094873	-2.83747	-1.50461	2.83747	down	UCSC_knowngene	1213	chr9	+	132105694	132106907	upstream	NM_203434	IER5L	immediate early response gene 5-like protein	4.68279	2.22737	4.68279	up	chr9	-	131937830	131940540
CR603409	lincRNA-FAM156A	4.14734	2.05219	4.14734	up	lincRNA	1248	chrX	-	52976959	52993397	upstream	NM_022117	TSPYL2	testis-specific Y-encoded-like protein 2	2.8556	1.51379	2.8556	up	chrX	+	53111541	53117728
chr11:8215149-8227449+	lincRNA-LMO1-2	-2.30498	-1.20476	2.30498	down	lincRNA	12301	chr11	+	8215149	8227449	upstream	NM_177972	TUB	tubby protein homolog isoform b	-2.14293	-1.09958	2.14293	down	chr11	+	8102908	8127654
AF191495	lincRNA-F11R	-2.07024	-1.0498	2.07024	down	lincRNA	2187	chr1	-	160967605	161008711	upstream	NM_004550	NDUFS2	NADH dehydrogenase [ubiquinone] iron-sulfur	-2.29778	-1.20024	2.29778	down	chr1	+	161169104	161184184
AK296262	lincRNA-PTEN-1	-2.74882	-1.45881	2.74882	down	lincRNA	1121	chr10	-	89892056	90343015	upstream	NM_020799	STAMBPL1	AMSH-like protease	7.61778	2.92937	7.61778	up	chr10	+	90640025	90683244
AK096322	lincRNA-FBRS	5.0325	2.33128	5.0325	up	lincRNA	2890	chr16	+	30671242	30682130	upstream	NM_001142305	ZNF771	zinc finger protein 771	-2.01289	-1.00927	2.01289	down	chr16	+	30418734	30429916
ENST00000421191	XXbac-BPG248L24.10	3.16893	1.664	3.16893	up	Ensembl	306	chr6	-	31275591	31276326	upstream	NM_006674	HCP5	HLA class I histocompatibility antigen protein	3.15042	1.65554	3.15042	up	chr6	+	31430956	31433586
ENST00000417149	RP11-298E9.6	-2.47378	-1.30672	2.47378	down	Ensembl	390	chr10	-	3282562	3299402	downstream	NM_002627	PFKP	6-phosphofructokinase type C isoform 1	12.3304	3.62414	12.3304	up	chr10	+	3109751	3178996
ENST00000421002	RP11-380B4.2	-2.24949	-1.1696	2.24949	down	Ensembl	903	chr13	-	33451568	33485788	upstream	NM_004795	KL	klotho precursor	-2.70091	-1.43344	2.70091	down	chr13	+	33590570	33640282
N80091	lincRNA-SPATA8-3	-2.33791	-1.22522	2.33791	down	lincRNA	436	chr15	+	96886179	96888182	upstream	NM_021005	NR2F2	COUP transcription factor 2 isoform a	-2.43164	-1.28193	2.43164	down	chr15	+	96874110	96883492
AW812672	lincRNA-MCPH1-1	-2.61327	-1.38585	2.61327	down	lincRNA	449	chr8	-	6559168	6563761	upstream	NM_005218	DEFB1	beta-defensin 1 preproprotein	-11.2654	-3.49383	11.2654	down	chr8	-	6728096	6735529
ENST00000505358	AC004611.1	-2.37439	-1.24756	2.37439	down	Ensembl	1207	chr19	+	5558184	5581226	downstream	NM_000150	FUT6	alpha-(1,3)-fucosyltransferase	-2.08206	-1.05801	2.08206	down	chr19	-	5830636	5839742
BF950033	lincRNA-ARID1A	-2.30689	-1.20595	2.30689	down	lincRNA	283	chr1	+	26948061	26948325	upstream	NM_005517	HMGN2	non-histone chromosomal protein HMG-17	3.78631	1.92079	3.78631	up	chr1	+	26798901	26803133
ENST00000470614	RP11-69M1.1	3.33013	1.73558	3.33013	up	Ensembl	315	chr12	-	8147365	8147680	upstream	NM_018088	FAM90A1	hypothetical protein LOC55138	2.68554	1.42521	2.68554	up	chr12	-	8373855	8380214
CD000492	lincRNA-WISP3-2	-6.65571	-2.73459	6.65571	down	lincRNA	304	chr6	+	112311747	112312016	downstream	NM_001105209	LAMA4	laminin subunit alpha-4 isoform 3 precursor	2.61414	1.38633	2.61414	up	chr6	-	112574985	112575828
BX110954	lincRNA-ZNF572-1	-4.27289	-2.09521	4.27289	down	lincRNA	620	chr8	+	125860978	125862459	downstream	NM_003129	SQLE	squalene monooxygenase	2.12044	1.08436	2.12044	up	chr8	+	126010719	126034525

## Sheet: 120T vs 120N
# Condition pairs: 120T vs 120N # Fold Change cut-off: 2.0 This table contains the differentially expressed lincRNA and nearby coding gene pairs (distance < 300 kb). # Column A: seqname, the sequence identifier. # Column B: GeneSymbol, the symbol of the LncRNA. # Column C: Fold change - LncRNAs, the ratio of normalized intensities between two samples, positive value indicates up-regulation, and n…
seqname	GeneSymbol	Fold change - LncRNAs	Log Fold change - LncRNAs	Absolute Fold change - LncRNAs	Regulation - LncRNAs	source	RNAlength	Chrom	Strand	txStart	txEnd	GenomeRelationship	NearbyGene	NearbyGeneSymbol	NearbyProteinName	Fold change - mRNAs	Log Fold change - mRNAs	Absolute Fold change - mRNAs	Regulation - mRNAs	NearbyGeneChrom	NearbyGeneStrand	NearbyGenetxStart	NearbyGenetxEnd
ENST00000477702	NCRNA00173	-2.84506	-1.50846	2.84506	down	Ensembl	314	chr12	+	116973868	116974323	downstream	NM_001109903	RNFT2	RING finger and transmembrane domain-containing	2.29786	1.20029	2.29786	up	chr12	+	117176095	117291436
NR_027345	NCRNA00173	-3.51894	-1.81514	3.51894	down	RefSeq_NR	1597	chr12	+	116971226	116973326	downstream	NM_001109903	RNFT2	RING finger and transmembrane domain-containing	2.29786	1.20029	2.29786	up	chr12	+	117176095	117291436
ENST00000428294	RP3-449O17.1	-4.12004	-2.04266	4.12004	down	Ensembl	700	chr22	-	38731766	38794921	downstream	NM_001039583	PICK1	PRKCA-binding protein	-2.11445	-1.08028	2.11445	down	chr22	+	38453261	38471708
ENST00000425356	RP11-54K16.2	2.3284	1.21934	2.3284	up	Ensembl	484	chr9	-	33019679	33020163	upstream	NM_001539	DNAJA1	dnaJ homolog subfamily A member 1	3.50272	1.80848	3.50272	up	chr9	+	33025208	33039062
ENST00000452496	ASS1P12	-14.9244	-3.8996	14.9244	down	Ensembl	1227	chr9	+	32945993	32947220	downstream	NM_001539	DNAJA1	dnaJ homolog subfamily A member 1	3.50272	1.80848	3.50272	up	chr9	+	33025208	33039062
AK021565		-2.34127	-1.22729	2.34127	down	RNAdb	1903	chr17	+	73599615	73601517	upstream	NM_001031803	LLGL2	lethal(2) giant larvae protein homolog 2 isoform	-4.02739	-2.00984	4.02739	down	chr17	+	73521782	73571290
chr20:2142500-2155375-	lincRNA-STK35	-2.08808	-1.06218	2.08808	down	lincRNA	12876	chr20	-	2142500	2155375	upstream	NM_003091	SNRPB	small nuclear ribonucleoprotein-associated	2.8645	1.51828	2.8645	up	chr20	-	2442280	2451499
CR595169		2.22098	1.1512	2.22098	up	RNAdb	1493	chr1	-	173833394	173836186	upstream	NM_001122770	ZBTB37	zinc finger and BTB domain-containing protein 37	-2.00778	-1.0056	2.00778	down	chr1	+	173837492	173855774
AF088026		-3.80774	-1.92894	3.80774	down	RNAdb	703	chr1	+	173832385	173833077	downstream	NM_001122770	ZBTB37	zinc finger and BTB domain-containing protein 37	-2.00778	-1.0056	2.00778	down	chr1	+	173837492	173855774
chr7:143147778-143169303-	lincRNA-TAS2R60	-2.3906	-1.25737	2.3906	down	lincRNA	21526	chr7	-	143147778	143169303	downstream	NM_176882	TAS2R40	taste receptor type 2 member 40	-2.50219	-1.32319	2.50219	down	chr7	+	142919171	142920143
AX721103		-2.38353	-1.2531	2.38353	down	misc_RNA	642	chr6	-	28083684	28084323	upstream	NM_001007531	NKAPL	NKAP-like protein	-2.35601	-1.23634	2.35601	down	chr6	+	28227097	28228736
uc002cuc.2	BC013599	2.71715	1.44209	2.71715	up	UCSC_knowngene	1114	chr16	-	3178836	3182043	downstream	NM_001012633	IL32	interleukin-32 isoform A	-4.47858	-2.16304	4.47858	down	chr16	+	3115312	3119668
AA368654	lincRNA-OPTC	-4.8889	-2.28951	4.8889	down	lincRNA	281	chr1	-	203482904	203483185	downstream	NM_002725	PRELP	prolargin precursor	-8.85218	-3.14603	8.85218	down	chr1	+	203444882	203460479
AK000839		-6.24692	-2.64314	6.24692	down	misc_RNA	1951	chr17	-	46657698	46659621	downstream	NM_001075099	SKAP1	src kinase-associated phosphoprotein 1 isoform	-2.39987	-1.26296	2.39987	down	chr17	-	46210801	46507594
AK124321	lincRNA-RNF32-3	-3.12382	-1.64331	3.12382	down	lincRNA	2538	chr7	+	155755325	155759037	upstream	NM_000193	SHH	sonic hedgehog protein preproprotein	-3.55902	-1.83148	3.55902	down	chr7	-	155595557	155604967
ENST00000508827	AL355916.1	-2.42639	-1.27881	2.42639	down	Ensembl	5103	chr14	-	62023037	62037371	upstream	NM_003082	SNAPC1	snRNA-activating protein complex subunit 1	2.12773	1.08932	2.12773	up	chr14	+	62229074	62263146
ENST00000393071	AC013474.3	5.52055	2.46481	5.52055	up	Ensembl	732	chr2	-	127315006	127315739	upstream	NM_016815	GYPC	glycophorin-C isoform 2	2.47059	1.30486	2.47059	up	chr2	+	127413683	127454246
uc003kzj.2	BC032795	2.04243	1.03029	2.04243	up	UCSC_knowngene	1045	chr5	+	133842304	133844920	upstream	NM_003337	UBE2B	ubiquitin-conjugating enzyme E2 B	2.28882	1.1946	2.28882	up	chr5	+	133706869	133727799
chr5:172618919-172633619+	lincRNA-NKX2-5-1	-2.60915	-1.38358	2.60915	down	lincRNA	14701	chr5	+	172618919	172633619	upstream	NM_016093	RPL26L1	60S ribosomal protein L26-like 1	3.00473	1.58724	3.00473	up	chr5	+	172386438	172396774
uc002nwh.1	DQ593116	-2.05786	-1.04115	2.05786	down	UCSC_knowngene	118	chr19	-	35306610	35306728	upstream	NM_001136199	GRAMD1A	GRAM domain-containing protein 1A isoform 2	2.36155	1.23973	2.36155	up	chr19	+	35491245	35517373
ENST00000428294	RP3-449O17.1	-4.12004	-2.04266	4.12004	down	Ensembl	700	chr22	-	38731766	38794921	upstream	NM_006855	KDELR3	ER lumen protein retaining receptor 3 isoform a	7.51775	2.9103	7.51775	up	chr22	+	38864082	38879445
ENST00000492365	KB-1683C8.1	2.4036	1.26519	2.4036	up	Ensembl	877	chr8	-	98636430	98637307	upstream	NM_018407	LAPTM4B	lysosomal-associated transmembrane protein 4B	3.21871	1.68648	3.21871	up	chr8	+	98787808	98864830
ENST00000429327	BX322559.2	-2.43973	-1.28672	2.43973	down	Ensembl	192	chr21	-	46796105	46796297	upstream	NM_130445	COL18A1	collagen alpha-1(XVIII) chain isoform 2	-2.12649	-1.08847	2.12649	down	chr21	+	46825096	46933634
AA827066	lincRNA-KIRREL3-1	-3.4247	-1.77598	3.4247	down	lincRNA	472	chr11	-	128165590	128166053	upstream	NM_001143820	ETS1	protein C-ets-1 isoform 1	-2.13881	-1.09681	2.13881	down	chr11	-	128328655	128457453
chr10:74002486-74020610+	lincRNA-DDIT4-1	-2.64254	-1.40192	2.64254	down	lincRNA	18125	chr10	+	74002486	74020610	downstream	NM_019058	DDIT4	DNA damage-inducible transcript 4 protein	8.44557	3.07819	8.44557	up	chr10	+	74033676	74035797
AA457263	lincRNA-GPR61	-2.82762	-1.49959	2.82762	down	lincRNA	451	chr1	+	110072368	110072818	upstream	NM_001040709	SYPL2	synaptophysin-like protein 2	-9.72207	-3.28126	9.72207	down	chr1	+	110009099	110024764
uc002cuc.2	BC013599	2.71715	1.44209	2.71715	up	UCSC_knowngene	1114	chr16	-	3178836	3182043	upstream	NM_001032292	ZNF174	zinc finger protein 174 isoform b	-2.25251	-1.17153	2.25251	down	chr16	+	3451189	3455043
ENST00000421191	XXbac-BPG248L24.10	2.81979	1.49559	2.81979	up	Ensembl	306	chr6	-	31275591	31276326	upstream	NM_001166538	LST1	leukocyte-specific transcript 1 protein isoform	2.97735	1.57403	2.97735	up	chr6	+	31554976	31556686
uc003nih.2	BC033330	-2.38933	-1.25661	2.38933	down	UCSC_knowngene	2883	chr6	+	26569551	26574925	upstream	NM_007047	BTN3A2	butyrophilin subfamily 3 member A2 isoform a	3.66043	1.87201	3.66043	up	chr6	+	26365397	26378548
AW182066	lincRNA-LOC100506581-4	-2.18424	-1.12713	2.18424	down	lincRNA	277	chr16	+	86669933	86670751	upstream	NM_005250	FOXL1	forkhead box protein L1	4.58841	2.198	4.58841	up	chr16	+	86612114	86615304
BX101441	lincRNA-C10orf46-1	-2.93374	-1.55274	2.93374	down	lincRNA	712	chr10	+	120374728	120375440	upstream	NM_004248	PRLHR	prolactin-releasing peptide receptor	-2.1653	-1.11457	2.1653	down	chr10	-	120352915	120355160
AK095484		-2.23278	-1.15884	2.23278	down	misc_RNA	2135	chr11	+	43665787	43667921	downstream	NM_001145033	C11orf96	protein Ag2 homolog	-2.73363	-1.45082	2.73363	down	chr11	+	43964105	43965433
ENST00000509266	AC026979.1	-3.08162	-1.62369	3.08162	down	Ensembl	1967	chr8	-	30044816	30047775	downstream	NM_006571	DCTN6	dynactin subunit 6	2.00922	1.00663	2.00922	up	chr8	+	30013812	30041155
uc003nih.2	BC033330	-2.38933	-1.25661	2.38933	down	UCSC_knowngene	2883	chr6	+	26569551	26574925	upstream	NM_001145009	BTN3A1	butyrophilin subfamily 3 member A1 isoform d	3.34278	1.74105	3.34278	up	chr6	+	26402464	26415444
AK000839		-6.24692	-2.64314	6.24692	down	misc_RNA	1951	chr17	-	46657698	46659621	upstream	NM_005831	CALCOCO2	calcium-binding and coiled-coil	2.41547	1.2723	2.41547	up	chr17	+	46908371	46942229
chr2:113359154-113374304-	lincRNA-CHCHD5-1	-2.58783	-1.37174	2.58783	down	lincRNA	15151	chr2	-	113359154	113374304	upstream	NM_000576	IL1B	interleukin-1 beta proprotein	3.65089	1.86825	3.65089	up	chr2	-	113587336	113594356
chr7:1348449-1366599+	lincRNA-MICALL2	-2.70152	-1.43377	2.70152	down	lincRNA	18151	chr7	+	1348449	1366599	downstream	NM_032302	PSMG3	proteasome assembly chaperone 3	2.44852	1.29191	2.44852	up	chr7	-	1606969	1609629
ENST00000492365	KB-1683C8.1	2.4036	1.26519	2.4036	up	Ensembl	877	chr8	-	98636430	98637307	upstream	NM_178812	MTDH	protein LYRIC	2.32814	1.21918	2.32814	up	chr8	+	98656406	98742488
exon2995-	lincRNA-TMEM174-2	-2.30095	-1.20223	2.30095	down	lincRNA	180	chr5	-	72715548	72715727	downstream	NM_153217	TMEM174	transmembrane protein 174	-12.6565	-3.6618	12.6565	down	chr5	+	72469022	72470970
exon2995+	lincRNA-FOXD1-2	2.27861	1.18816	2.27861	up	lincRNA	180	chr5	+	72715548	72715727	upstream	NM_153217	TMEM174	transmembrane protein 174	-12.6565	-3.6618	12.6565	down	chr5	+	72469022	72470970
exon2995-	lincRNA-TMEM174-2	-2.30095	-1.20223	2.30095	down	lincRNA	180	chr5	-	72715548	72715727	upstream	NM_001080479	RGNEF	rho-guanine nucleotide exchange factor isoform	-2.29067	-1.19577	2.29067	down	chr5	+	72921982	73237818
exon2995+	lincRNA-FOXD1-2	2.27861	1.18816	2.27861	up	lincRNA	180	chr5	+	72715548	72715727	downstream	NM_001080479	RGNEF	rho-guanine nucleotide exchange factor isoform	-2.29067	-1.19577	2.29067	down	chr5	+	72921982	73237818
uc002cuc.2	BC013599	2.71715	1.44209	2.71715	up	UCSC_knowngene	1114	chr16	-	3178836	3182043	downstream	NM_152341	PAQR4	progestin and adipoQ receptor family member 4	14.9323	3.90036	14.9323	up	chr16	+	3019341	3023485
ENST00000445730	RP11-525A16.1	2.31917	1.21361	2.31917	up	Ensembl	497	chr10	-	112188597	112255954	upstream	NM_001134363	RBM20	probable RNA-binding protein 20	-3.06761	-1.61712	3.06761	down	chr10	+	112404154	112599227
NR_027345	NCRNA00173	-3.51894	-1.81514	3.51894	down	RefSeq_NR	1597	chr12	+	116971226	116973326	downstream	NM_001085481	MAP1LC3B2	microtubule-associated proteins 1A/1B light	2.41644	1.27288	2.41644	up	chr12	+	116997185	117014425
ENST00000477702	NCRNA00173	-2.84506	-1.50846	2.84506	down	Ensembl	314	chr12	+	116973868	116974323	downstream	NM_001085481	MAP1LC3B2	microtubule-associated proteins 1A/1B light	2.41644	1.27288	2.41644	up	chr12	+	116997185	117014425
uc009wxq.1	BC039493	-2.96841	-1.56969	2.96841	down	UCSC_knowngene	538	chr1	+	181143619	181151340	upstream	NM_004736	XPR1	xenotropic and polytropic retrovirus receptor 1	-2.00206	-1.00149	2.00206	down	chr1	+	180601145	180859415
chr1:181081092-181121244+	lincRNA-CACNA1E-3	-6.74641	-2.75412	6.74641	down	lincRNA	40153	chr1	+	181081092	181121244	upstream	NM_004736	XPR1	xenotropic and polytropic retrovirus receptor 1	-2.00206	-1.00149	2.00206	down	chr1	+	180601145	180859415
ENST00000433054	RP11-1O7.1	2.86604	1.51906	2.86604	up	Ensembl	884	chr2	+	174162356	174163240	upstream	NM_133646	ZAK	mitogen-activated protein kinase kinase kinase	2.24764	1.16841	2.24764	up	chr2	+	173940564	174091873
AK021565		-2.34127	-1.22729	2.34127	down	RNAdb	1903	chr17	+	73599615	73601517	upstream	NM_207346	TSEN54	tRNA-splicing endonuclease subunit Sen54	2.05742	1.04083	2.05742	up	chr17	+	73512608	73520820
AK131566	lincRNA-NR4A1	-3.49679	-1.80603	3.49679	down	lincRNA	3513	chr12	+	52431498	52453285	upstream	NM_001130015	ANKRD33	ankyrin repeat domain-containing protein 33	2.17193	1.11898	2.17193	up	chr12	+	52281792	52285505
ENST00000414613	AC010733.8	2.04985	1.03552	2.04985	up	Ensembl	1231	chr2	-	61163953	61165184	upstream	NM_001129993	KIAA1841	KIAA1841 protein isoform a	2.01094	1.00787	2.01094	up	chr2	+	61293005	61351413
CN284611	lincRNA-CUX2	2.50753	1.32627	2.50753	up	lincRNA	731	chr12	+	111378154	111378886	upstream	NM_001173976	TCTN1	tectonic-1 isoform 5	2.37879	1.25023	2.37879	up	chr12	+	111051831	111086935
ENST00000509266	AC026979.1	-3.08162	-1.62369	3.08162	down	Ensembl	1967	chr8	-	30044816	30047775	upstream	NM_006867	RBPMS	RNA-binding protein with multiple splicing	2.99913	1.58454	2.99913	up	chr8	+	30241943	30429734
AJ227862		3.50317	1.80866	3.50317	up	misc_RNA	457	chr5	+	102118475	102118934	downstream	NM_000919	PAM	peptidyl-glycine alpha-amidating monooxygenase	4.55744	2.18822	4.55744	up	chr5	+	102201526	102366808
AX721103		-2.38353	-1.2531	2.38353	down	misc_RNA	642	chr6	-	28083684	28084323	upstream	NM_024493	ZKSCAN3	zinc finger protein with KRAB and SCAN domains	-6.0166	-2.58895	6.0166	down	chr6	+	28317690	28334524
EB388332	lincRNA-MYOC	3.15748	1.65878	3.15748	up	lincRNA	699	chr1	+	171561933	171562679	upstream	NM_002022	FMO4	dimethylaniline monooxygenase [N-oxide-forming]	-11.2817	-3.49591	11.2817	down	chr1	+	171283485	171311223
CN284611	lincRNA-CUX2	2.50753	1.32627	2.50753	up	lincRNA	731	chr12	+	111378154	111378886	downstream	NM_015267	CUX2	homeobox protein cut-like 2	2.98471	1.57759	2.98471	up	chr12	+	111471827	111788358
AA827066	lincRNA-KIRREL3-1	-3.4247	-1.77598	3.4247	down	lincRNA	472	chr11	-	128165590	128166053	upstream	NM_001162422	ETS1	protein C-ets-1 isoform 3	-2.11977	-1.08391	2.11977	down	chr11	-	128328655	128392205
BX112397	lincRNA-FAM183A-2	-2.29124	-1.19613	2.29124	down	lincRNA	753	chr1	+	43464813	43465491	downstream	NM_144626	TMEM125	transmembrane protein 125	-4.48162	-2.16402	4.48162	down	chr1	+	43735664	43739673
AA368654	lincRNA-OPTC	-4.8889	-2.28951	4.8889	down	lincRNA	281	chr1	-	203482904	203483185	downstream	NM_006763	BTG2	protein BTG2	-2.67118	-1.41748	2.67118	down	chr1	+	203274663	203278729
DB030353	lincRNA-RPUSD4-2	-2.38771	-1.25563	2.38771	down	lincRNA	613	chr11	+	125976772	125977385	downstream	NM_001039661	TIRAP	toll/interleukin-1 receptor domain-containing	-2.29641	-1.19938	2.29641	down	chr11	+	126152981	126164828
ENST00000425356	RP11-54K16.2	2.3284	1.21934	2.3284	up	Ensembl	484	chr9	-	33019679	33020163	upstream	NM_016410	CHMP5	charged multivesicular body protein 5 isoform 1	2.05685	1.04044	2.05685	up	chr9	+	33264876	33282067
AK124936	lincRNA-FAM47E	-4.39955	-2.13736	4.39955	down	lincRNA	1624	chr4	+	77135192	77204933	downstream	NM_003943	STBD1	starch-binding domain-containing protein 1	2.91828	1.54512	2.91828	up	chr4	+	77227676	77232283
ENST00000513381	RP11-834C11.5	-2.59162	-1.37386	2.59162	down	Ensembl	499	chr12	-	54478915	54519614	upstream	NM_016057	COPZ1	coatomer subunit zeta-1	2.93934	1.55549	2.93934	up	chr12	+	54718910	54745633
ENST00000417795	AC034220.3	3.06106	1.61403	3.06106	up	Ensembl	1792	chr5	-	131646977	131705608	downstream	NM_001131027	PDLIM4	PDZ and LIM domain protein 4 isoform 2	-2.45288	-1.29448	2.45288	down	chr5	+	131593350	131609147
uc003kwu.1	BX538252	2.22419	1.15328	2.22419	up	UCSC_knowngene	916	chr5	-	131701645	131705196	downstream	NM_001131027	PDLIM4	PDZ and LIM domain protein 4 isoform 2	-2.45288	-1.29448	2.45288	down	chr5	+	131593350	131609147
ENST00000450133	RP9P	2.35095	1.23325	2.35095	up	Ensembl	1212	chr7	-	32956426	32982650	downstream	NM_015483	KBTBD2	kelch repeat and BTB domain-containing protein	3.62501	1.85798	3.62501	up	chr7	-	32907777	32931468
AJ227862		3.50317	1.80866	3.50317	up	misc_RNA	457	chr5	+	102118475	102118934	downstream	NM_138822	PAM	peptidyl-glycine alpha-amidating monooxygenase	3.05845	1.6128	3.05845	up	chr5	+	102201526	102366808
CU692690	lincRNA-TNFRSF13C	-2.34034	-1.22672	2.34034	down	lincRNA	1342	chr22	+	42120333	42423168	upstream	NM_014460	CSDC2	cold shock domain-containing protein C2	-11.5278	-3.52704	11.5278	down	chr22	+	41957013	41972670
ENST00000513381	RP11-834C11.5	-2.59162	-1.37386	2.59162	down	Ensembl	499	chr12	-	54478915	54519614	downstream	NM_173860	HOXC12	homeobox protein Hox-C12	-2.18377	-1.12682	2.18377	down	chr12	+	54348713	54350350
chr20:2142500-2155375-	lincRNA-STK35	-2.08808	-1.06218	2.08808	down	lincRNA	12876	chr20	-	2142500	2155375	downstream	NM_080792	SIRPA	tyrosine-protein phosphatase non-receptor type	4.17248	2.0609	4.17248	up	chr20	+	1875424	1920540
ENST00000428294	RP3-449O17.1	-4.12004	-2.04266	4.12004	down	Ensembl	700	chr22	-	38731766	38794921	downstream	NM_001039584	PICK1	PRKCA-binding protein	-2.17962	-1.12408	2.17962	down	chr22	+	38453261	38471708
AA457263	lincRNA-GPR61	-2.82762	-1.49959	2.82762	down	lincRNA	451	chr1	+	110072368	110072818	downstream	NM_000851	GSTM5	glutathione S-transferase Mu 5	-5.20941	-2.38112	5.20941	down	chr1	+	110254863	110260890
ENST00000490750	RPLP0P2	3.78884	1.92175	3.78884	up	Ensembl	961	chr11	+	61404151	61405112	upstream	NM_145017	C11orf66	IIIG9 protein isoform 1	-2.29959	-1.20137	2.29959	down	chr11	+	61248584	61258400
chr7:117584264-117586960+	lincRNA-NAA38	-4.25536	-2.08928	4.25536	down	lincRNA	2697	chr7	+	117584264	117586960	downstream	NM_016200	NAA38	N-alpha-acetyltransferase 38, NatC auxiliary	4.67377	2.22459	4.67377	up	chr7	+	117824085	117844093
ENST00000454403	RP11-396A22.4	3.62502	1.85799	3.62502	up	Ensembl	411	chr13	-	41958908	41959319	downstream	NM_152903	KBTBD6	kelch repeat and BTB domain-containing protein	-2.86356	-1.51781	2.86356	down	chr13	-	41701708	41706936
exon848+	lincRNA-ZW10	-2.62657	-1.39318	2.62657	down	lincRNA	153	chr11	+	113592424	113592576	downstream	NM_213621	HTR3A	5-hydroxytryptamine receptor 3A isoform a	-2.86954	-1.52082	2.86954	down	chr11	+	113845796	113861034
AL049252		-3.00242	-1.58612	3.00242	down	NRED	3343	chr6	-	30268570	30271892	upstream	NM_025263	PRR3	proline-rich protein 3 isoform a	-2.27088	-1.18325	2.27088	down	chr6	+	30524485	30532473
CF128868	lincRNA-DLL1-2	-3.89375	-1.96116	3.89375	down	lincRNA	705	chr6	+	170349016	170349726	downstream	NM_032448	FAM120B	constitutive coactivator of peroxisome	-2.47462	-1.30721	2.47462	down	chr6	+	170615843	170714237
uc002cuc.2	BC013599	2.71715	1.44209	2.71715	up	UCSC_knowngene	1114	chr16	-	3178836	3182043	downstream	NM_001012635	IL32	interleukin-32 isoform C	-5.09587	-2.34933	5.09587	down	chr16	+	3115611	3119668
uc003tvu.2	BC017910	-2.72653	-1.44707	2.72653	down	UCSC_knowngene	487	chr7	+	66800962	66805009	upstream	NM_022906	STAG3L4	STAG3-like protein 4	2.98482	1.57765	2.98482	up	chr7	+	66767615	66786513
ENST00000344851	RP1-274L14.2	2.18963	1.13069	2.18963	up	Ensembl	1979	chr6	-	158658367	158663829	downstream	NM_032861	SERAC1	protein SERAC1	-3.60107	-1.84843	3.60107	down	chr6	-	158530535	158589312
NR_003277	LOC728643	6.22348	2.63772	6.22348	up	RefSeq_NR	542	chr10	-	47133296	47133836	downstream	NM_014696	GPRIN2	G protein-regulated inducer of neurite outgrowth	4.27041	2.09437	4.27041	up	chr10	+	46993545	47000568
AA564591	lincRNA-PPYR1-2	-2.81701	-1.49416	2.81701	down	lincRNA	385	chr10	+	46744329	47220766	overlap	NM_014696	GPRIN2	G protein-regulated inducer of neurite outgrowth	4.27041	2.09437	4.27041	up	chr10	+	46993545	47000568
exon2995+	lincRNA-FOXD1-2	2.27861	1.18816	2.27861	up	lincRNA	180	chr5	+	72715548	72715727	downstream	NM_001207	BTF3	transcription factor BTF3 isoform B	2.79316	1.4819	2.79316	up	chr5	+	72794249	72801448
exon2995-	lincRNA-TMEM174-2	-2.30095	-1.20223	2.30095	down	lincRNA	180	chr5	-	72715548	72715727	upstream	NM_001207	BTF3	transcription factor BTF3 isoform B	2.79316	1.4819	2.79316	up	chr5	+	72794249	72801448
CU692690	lincRNA-TNFRSF13C	-2.34034	-1.22672	2.34034	down	lincRNA	1342	chr22	+	42120333	42423168	upstream	NM_001098	ACO2	aconitate hydratase, mitochondrial precursor	-4.83742	-2.27424	4.83742	down	chr22	+	41865128	41924993
AK021484	lincRNA-SYNPO2	-3.0737	-1.61998	3.0737	down	lincRNA	3422	chr4	+	119672345	119956974	overlap	NM_001128933	SYNPO2	synaptopodin-2 isoform b	-2.15501	-1.1077	2.15501	down	chr4	+	119809995	119959669
DA922283	lincRNA-TH	-2.72716	-1.4474	2.72716	down	lincRNA	568	chr11	-	2229882	2230451	downstream	NM_000207	INS	insulin preproprotein	-2.20428	-1.14031	2.20428	down	chr11	-	2181008	2182439
NR_028408	LOC400027	-2.0124	-1.00891	2.0124	down	RefSeq_NR	2202	chr12	-	46119502	46121704	downstream	NM_001025356	ANO6	anoctamin-6 isoform a	2.61703	1.38793	2.61703	up	chr12	+	45609769	45826134
ENST00000340510	AC004987.7	-2.28218	-1.19041	2.28218	down	Ensembl	3049	chr7	+	39773230	39832691	upstream	NM_001166018	POU6F2	POU domain, class 6, transcription factor 2	-2.52696	-1.3374	2.52696	down	chr7	+	39017608	39504390
ENST00000449818	RP11-40H20.2	5.13837	2.36131	5.13837	up	Ensembl	867	chr1	+	27533420	27534287	upstream	NM_001013642	TRNP1	TMF-regulated nuclear protein 1	2.47032	1.3047	2.47032	up	chr1	+	27320194	27327377
ENST00000446783	RP11-40H20.1	2.27358	1.18497	2.27358	up	Ensembl	640	chr1	-	27527324	27527964	downstream	NM_001013642	TRNP1	TMF-regulated nuclear protein 1	2.47032	1.3047	2.47032	up	chr1	+	27320194	27327377
ENST00000425205	RP11-40H20.4	-2.20511	-1.14085	2.20511	down	Ensembl	379	chr1	-	27555596	27560843	downstream	NM_001013642	TRNP1	TMF-regulated nuclear protein 1	2.47032	1.3047	2.47032	up	chr1	+	27320194	27327377
chr5:172618919-172633619+	lincRNA-NKX2-5-1	-2.60915	-1.38358	2.60915	down	lincRNA	14701	chr5	+	172618919	172633619	upstream	NM_001031711	ERGIC1	endoplasmic reticulum-Golgi intermediate	4.67507	2.22499	4.67507	up	chr5	+	172261222	172379688
exon92-	lincRNA-DMBX1	-2.20041	-1.13777	2.20041	down	lincRNA	197	chr1	-	46992321	46992517	downstream	NM_001441	FAAH	fatty-acid amide hydrolase 1	-3.97803	-1.99205	3.97803	down	chr1	+	46859938	46879520
exon95+	lincRNA-KNCN	-2.30384	-1.20404	2.30384	down	lincRNA	271	chr1	+	46997334	46997604	upstream	NM_001441	FAAH	fatty-acid amide hydrolase 1	-3.97803	-1.99205	3.97803	down	chr1	+	46859938	46879520
ENST00000421191	XXbac-BPG248L24.10	2.81979	1.49559	2.81979	up	Ensembl	306	chr6	-	31275591	31276326	upstream	NM_205840	LST1	leukocyte-specific transcript 1 protein isoform	2.08303	1.05868	2.08303	up	chr6	+	31554976	31556686
AA583819	lincRNA-LGI2	-2.88196	-1.52705	2.88196	down	lincRNA	257	chr4	-	25090390	25090645	downstream	NM_003102	SOD3	extracellular superoxide dismutase [Cu-Zn]	-2.38155	-1.2519	2.38155	down	chr4	+	24797084	24802467
AK124473		-2.01141	-1.0082	2.01141	down	misc_RNA	2210	chr4	+	24661478	24673189	downstream	NM_003102	SOD3	extracellular superoxide dismutase [Cu-Zn]	-2.38155	-1.2519	2.38155	down	chr4	+	24797084	24802467
AX721103		-2.38353	-1.2531	2.38353	down	misc_RNA	642	chr6	-	28083684	28084323	downstream	NM_003520	HIST1H2BN	histone H2B type 1-N	2.22899	1.15639	2.22899	up	chr6	+	27806439	27806888
BX478947	lincRNA-CD53	-2.62479	-1.3922	2.62479	down	lincRNA	685	chr1	-	111460165	111460747	upstream	NM_024901	DENND2D	DENN domain-containing protein 2D	3.90432	1.96507	3.90432	up	chr1	-	111729800	111743281
ENST00000435407	AC024704.2	-2.04295	-1.03066	2.04295	down	Ensembl	416	chr2	-	114586966	114588696	upstream	NM_005721	ACTR3	actin-related protein 3	3.16484	1.66213	3.16484	up	chr2	+	114647536	114716167
exon2995+	lincRNA-FOXD1-2	2.27861	1.18816	2.27861	up	lincRNA	180	chr5	+	72715548	72715727	downstream	NM_001037637	BTF3	transcription factor BTF3 isoform A	3.11863	1.64091	3.11863	up	chr5	+	72794249	72801448
exon2995-	lincRNA-TMEM174-2	-2.30095	-1.20223	2.30095	down	lincRNA	180	chr5	-	72715548	72715727	upstream	NM_001037637	BTF3	transcription factor BTF3 isoform A	3.11863	1.64091	3.11863	up	chr5	+	72794249	72801448
AA457263	lincRNA-GPR61	-2.82762	-1.49959	2.82762	down	lincRNA	451	chr1	+	110072368	110072818	downstream	NM_203404	AMPD2	AMP deaminase 2 isoform 3	-2.68861	-1.42686	2.68861	down	chr1	+	110168048	110174677
ENST00000470614	RP11-69M1.1	2.84935	1.51063	2.84935	up	Ensembl	315	chr12	-	8147365	8147680	upstream	NM_004054	C3AR1	C3a anaphylatoxin chemotactic receptor	3.36851	1.75211	3.36851	up	chr12	-	8210918	8218955
AK095484		-2.23278	-1.15884	2.23278	down	misc_RNA	2135	chr11	+	43665787	43667921	downstream	NM_139178	ALKBH3	alpha-ketoglutarate-dependent dioxygenase alkB	2.02689	1.01927	2.02689	up	chr11	+	43902356	43941825
DA088898	lincRNA-INCENP	-2.85136	-1.51165	2.85136	down	lincRNA	560	chr11	+	61740183	61740743	upstream	NM_001139443	BEST1	bestrophin-1 isoform 2	2.6658	1.41457	2.6658	up	chr11	+	61717355	61731066
exon95+	lincRNA-KNCN	-2.30384	-1.20404	2.30384	down	lincRNA	271	chr1	+	46997334	46997604	upstream	NM_006004	UQCRH	cytochrome b-c1 complex subunit 6,	-3.04426	-1.60609	3.04426	down	chr1	+	46769379	46782447
exon92-	lincRNA-DMBX1	-2.20041	-1.13777	2.20041	down	lincRNA	197	chr1	-	46992321	46992517	downstream	NM_006004	UQCRH	cytochrome b-c1 complex subunit 6,	-3.04426	-1.60609	3.04426	down	chr1	+	46769379	46782447
BX953928	lincRNA-DOK2	-3.80292	-1.92711	3.80292	down	lincRNA	442	chr8	+	21714378	21714822	downstream	NM_003974	DOK2	docking protein 2	5.36398	2.4233	5.36398	up	chr8	-	21766383	21771205
AA219474	lincRNA-RUNX2-2	-2.29544	-1.19877	2.29544	down	lincRNA	361	chr6	-	45828558	45828919	upstream	NM_021572	ENPP5	ectonucleotide pyrophosphatase/phosphodiesterase	-2.14257	-1.09935	2.14257	down	chr6	-	46127761	46138717
uc002cuc.2	BC013599	2.71715	1.44209	2.71715	up	UCSC_knowngene	1114	chr16	-	3178836	3182043	downstream	NM_016639	TNFRSF12A	tumor necrosis factor receptor superfamily	5.57372	2.47864	5.57372	up	chr16	+	3070312	3072383
chr2:237543636-237554786+	lincRNA-COPS8-1	-2.55422	-1.35288	2.55422	down	lincRNA	11151	chr2	+	237543636	237554786	upstream	NM_024726	IQCA1	IQ and AAA domain-containing protein 1	-2.04728	-1.03371	2.04728	down	chr2	-	237232793	237416092
AX747492	lincRNA-HFE2	3.41281	1.77096	3.41281	up	lincRNA	4510	chr1	+	145209144	146424095	upstream	NM_022359	PDE4DIP	myomegalin isoform 3	4.39181	2.13482	4.39181	up	chr1	-	144951760	145076186
AK316271	lincRNA-SUCLA2-1	-2.67671	-1.42046	2.67671	down	lincRNA	1801	chr13	-	48517468	48612125	upstream	NM_021999	ITM2B	integral membrane protein 2B	-3.59693	-1.84677	3.59693	down	chr13	+	48807273	48836232
ENST00000446783	RP11-40H20.1	2.27358	1.18497	2.27358	up	Ensembl	640	chr1	-	27527324	27527964	upstream	NM_032125	TMEM222	transmembrane protein 222	-2.37225	-1.24625	2.37225	down	chr1	+	27648635	27662891
ENST00000449818	RP11-40H20.2	5.13837	2.36131	5.13837	up	Ensembl	867	chr1	+	27533420	27534287	downstream	NM_032125	TMEM222	transmembrane protein 222	-2.37225	-1.24625	2.37225	down	chr1	+	27648635	27662891
ENST00000425205	RP11-40H20.4	-2.20511	-1.14085	2.20511	down	Ensembl	379	chr1	-	27555596	27560843	upstream	NM_032125	TMEM222	transmembrane protein 222	-2.37225	-1.24625	2.37225	down	chr1	+	27648635	27662891
uc002cuc.2	BC013599	2.71715	1.44209	2.71715	up	UCSC_knowngene	1114	chr16	-	3178836	3182043	downstream	NM_001002017	HCFC1R1	host cell factor C1 regulator 1 isoform 2	2.09267	1.06535	2.09267	up	chr16	-	3072625	3074287
AK098701		-2.20038	-1.13775	2.20038	down	misc_RNA	1416	chr1	+	25031405	25034237	upstream	NM_005839	SRRM1	serine/arginine repetitive matrix protein 1	2.32177	1.21522	2.32177	up	chr1	+	24969593	24999772
ENST00000513381	RP11-834C11.5	-2.59162	-1.37386	2.59162	down	Ensembl	499	chr12	-	54478915	54519614	upstream	NM_015481	ZNF385A	zinc finger protein 385A isoform c	-2.56783	-1.36055	2.56783	down	chr12	-	54762919	54778481
AX747492	lincRNA-HFE2	3.41281	1.77096	3.41281	up	lincRNA	4510	chr1	+	145209144	146424095	upstream	NM_001002810	PDE4DIP	myomegalin isoform 4	5.88529	2.55711	5.88529	up	chr1	-	144951760	144995033
uc009wxq.1	BC039493	-2.96841	-1.56969	2.96841	down	UCSC_knowngene	538	chr1	+	181143619	181151340	upstream	NM_016545	IER5	immediate early response gene 5 protein	4.16733	2.05912	4.16733	up	chr1	+	181057637	181059979
chr1:181081092-181121244+	lincRNA-CACNA1E-3	-6.74641	-2.75412	6.74641	down	lincRNA	40153	chr1	+	181081092	181121244	upstream	NM_016545	IER5	immediate early response gene 5 protein	4.16733	2.05912	4.16733	up	chr1	+	181057637	181059979
ENST00000456771	RP11-540K16.2	-2.85266	-1.51231	2.85266	down	Ensembl	532	chr1	-	181159606	181160285	downstream	NM_016545	IER5	immediate early response gene 5 protein	4.16733	2.05912	4.16733	up	chr1	+	181057637	181059979
BU657491	lincRNA-CACNA1C	-2.95268	-1.56203	2.95268	down	lincRNA	581	chr12	-	2870365	2879621	upstream	NM_003324	TULP3	tubby-related protein 3 isoform 1	3.28172	1.71445	3.28172	up	chr12	+	3000032	3050306
CN412465	lincRNA-FGD2	-2.56295	-1.35781	2.56295	down	lincRNA	563	chr6	-	37103028	37103592	downstream	NM_153370	PI16	peptidase inhibitor 16 precursor	-3.69318	-1.88486	3.69318	down	chr6	+	36922208	36932613
ENST00000429327	BX322559.2	-2.43973	-1.28672	2.43973	down	Ensembl	192	chr21	-	46796105	46796297	upstream	NM_194255	SLC19A1	folate transporter 1 isoform 1	3.12998	1.64616	3.12998	up	chr21	-	46934628	46962385
AW129555	lincRNA-DEPTOR-2	-2.38529	-1.25417	2.38529	down	lincRNA	380	chr8	-	121073763	121074142	downstream	NM_022783	DEPTOR	DEP domain-containing mTOR-interacting protein	-2.52356	-1.33546	2.52356	down	chr8	+	120885899	121063157
uc001lkg.1	AK124226	-2.19595	-1.13485	2.19595	down	UCSC_knowngene	3086	chr10	+	129979399	130115990	upstream	NM_152311	CLRN3	clarin-3	2.38876	1.25626	2.38876	up	chr10	-	129676113	129691211
ENST00000479610	RP11-59J16.2	-2.09136	-1.06444	2.09136	down	Ensembl	697	chr3	+	127208395	127209630	downstream	NM_172027	ABTB1	ankyrin repeat and BTB/POZ domain-containing	-3.56079	-1.8322	3.56079	down	chr3	+	127391780	127399769
ENST00000479610	RP11-59J16.2	-2.09136	-1.06444	2.09136	down	Ensembl	697	chr3	+	127208395	127209630	downstream	NM_004526	MCM2	DNA replication licensing factor MCM2	14.6669	3.8745	14.6669	up	chr3	+	127317252	127341278
chr7:1348449-1366599+	lincRNA-MICALL2	-2.70152	-1.43377	2.70152	down	lincRNA	18151	chr7	+	1348449	1366599	upstream	NM_138445	GPR146	probable G-protein coupled receptor 146	-2.44277	-1.28852	2.44277	down	chr7	+	1097140	1098897
chr1:29096302-29111760-	lincRNA-YTHDF2	-2.91357	-1.54279	2.91357	down	lincRNA	15459	chr1	-	29096302	29111760	downstream	NM_001172828	YTHDF2	YTH domain family protein 2 isoform 2	2.2058	1.1413	2.2058	up	chr1	+	29063451	29096287
AK304777	lincRNA-FBLN2-2	-3.34654	-1.74267	3.34654	down	lincRNA	3873	chr3	+	13573823	13679512	upstream	NM_024923	NUP210	nuclear pore membrane glycoprotein 210	-2.23151	-1.15802	2.23151	down	chr3	-	13357736	13461809
AX747492	lincRNA-HFE2	3.41281	1.77096	3.41281	up	lincRNA	4510	chr1	+	145209144	146424095	overlap	NM_014455	RNF115	E3 ubiquitin-protein ligase RNF115	2.13729	1.09579	2.13729	up	chr1	+	145611035	145688776
AK131566	lincRNA-NR4A1	-3.49679	-1.80603	3.49679	down	lincRNA	3513	chr12	+	52431498	52453285	downstream	NM_005556	KRT7	keratin, type II cytoskeletal 7	-4.24309	-2.08512	4.24309	down	chr12	+	52626953	52642709
ENST00000513381	RP11-834C11.5	-2.59162	-1.37386	2.59162	down	Ensembl	499	chr12	-	54478915	54519614	downstream	NM_014620	HOXC4	homeobox protein Hox-C4	-2.40783	-1.26773	2.40783	down	chr12	+	54410641	54449814
chr13:28387150-28402025-	lincRNA-GSX1	-2.11419	-1.0801	2.11419	down	lincRNA	14876	chr13	-	28387150	28402025	downstream	NM_145657	GSX1	GS homeobox 1	-2.15047	-1.10466	2.15047	down	chr13	+	28366779	28368089
CU692690	lincRNA-TNFRSF13C	-2.34034	-1.22672	2.34034	down	lincRNA	1342	chr22	+	42120333	42423168	downstream	NM_033318	C22orf32	hypothetical protein LOC91689 precursor	-2.93816	-1.55491	2.93816	down	chr22	+	42475698	42480288
AA164863	lincRNA-TMEM9	-3.45387	-1.78822	3.45387	down	lincRNA	472	chr1	-	201142621	201143091	downstream	NM_017596	KIF21B	kinesin-like protein KIF21B	5.47191	2.45205	5.47191	up	chr1	-	200938519	200992828
CK819477	lincRNA-APLN-2	-2.00382	-1.00275	2.00382	down	lincRNA	356	chrX	-	128809864	128812318	upstream	NM_003399	XPNPEP2	xaa-Pro aminopeptidase 2 precursor	-28.5931	-4.8376	28.5931	down	chrX	+	128872945	128903525
ENST00000421191	XXbac-BPG248L24.10	2.81979	1.49559	2.81979	up	Ensembl	306	chr6	-	31275591	31276326	downstream	NM_014068	PSORS1C1	psoriasis susceptibility 1 candidate 1	9.64699	3.27008	9.64699	up	chr6	+	31082607	31107869
AK124936	lincRNA-FAM47E	-4.39955	-2.13736	4.39955	down	lincRNA	1624	chr4	+	77135192	77204933	upstream	NM_001130016	ART3	ecto-ADP-ribosyltransferase 3 isoform a	-2.65418	-1.40826	2.65418	down	chr4	+	76995862	77033955
chrX:118607438-118617354+	lincRNA-CXorf56-3	-2.2555	-1.17345	2.2555	down	lincRNA	9917	chrX	+	118607438	118617354	upstream	NM_001152	SLC25A5	ADP/ATP translocase 2	-2.98131	-1.57595	2.98131	down	chrX	+	118602362	118605359
BG619841	lincRNA-SLC25A5-3	-2.05895	-1.04191	2.05895	down	lincRNA	544	chrX	-	118610256	118610797	downstream	NM_001152	SLC25A5	ADP/ATP translocase 2	-2.98131	-1.57595	2.98131	down	chrX	+	118602362	118605359
DA088898	lincRNA-INCENP	-2.85136	-1.51165	2.85136	down	lincRNA	560	chr11	+	61740183	61740743	downstream	NM_006551	SCGB1D2	secretoglobin family 1D member 2 precursor	-3.32483	-1.73328	3.32483	down	chr11	+	62009723	62012280
ENST00000513381	RP11-834C11.5	-2.59162	-1.37386	2.59162	down	Ensembl	499	chr12	-	54478915	54519614	downstream	NM_017409	HOXC10	homeobox protein Hox-C10	-7.48356	-2.90373	7.48356	down	chr12	+	54378945	54384062
AA457263	lincRNA-GPR61	-2.82762	-1.49959	2.82762	down	lincRNA	451	chr1	+	110072368	110072818	upstream	NM_001134400	CYB561D1	cytochrome b561 domain-containing protein 1	2.6188	1.3889	2.6188	up	chr1	+	110036700	110043063
AK096322	lincRNA-FBRS	2.15157	1.10539	2.15157	up	lincRNA	2890	chr16	+	30671242	30682130	downstream	NM_152288	ORAI3	protein orai-3	2.44579	1.2903	2.44579	up	chr16	+	30960404	30966259
uc002cuc.2	BC013599	2.71715	1.44209	2.71715	up	UCSC_knowngene	1114	chr16	-	3178836	3182043	downstream	NM_020982	CLDN9	claudin-9	-13.6755	-3.77352	13.6755	down	chr16	+	3062456	3064506
uc003kzj.2	BC032795	2.04243	1.03029	2.04243	up	UCSC_knowngene	1045	chr5	+	133842304	133844920	downstream	NM_021982	SEC24A	protein transport protein Sec24A	2.63152	1.3959	2.63152	up	chr5	+	133984478	134063601
ENST00000429250	RP11-90J7.3	-2.50716	-1.32605	2.50716	down	Ensembl	607	chr10	+	80008496	80310446	upstream	NM_001026	RPS24	40S ribosomal protein S24 isoform c	2.63824	1.39957	2.63824	up	chr10	+	79793517	79800473
BX112397	lincRNA-FAM183A-2	-2.29124	-1.19613	2.29124	down	lincRNA	753	chr1	+	43464813	43465491	upstream	NM_001146289	LEPRE1	prolyl 3-hydroxylase 1 isoform 2	2.63368	1.39708	2.63368	up	chr1	-	43212005	43232755
ENST00000426284	AC096772.4	3.03271	1.60061	3.03271	up	Ensembl	444	chr2	+	208546313	208546757	downstream	NM_152523	CCNYL1	cyclin-Y-like protein 1 isoform 2	4.0814	2.02907	4.0814	up	chr2	+	208576263	208620896
ENST00000454403	RP11-396A22.4	3.62502	1.85799	3.62502	up	Ensembl	411	chr13	-	41958908	41959319	downstream	NM_032138	KBTBD7	kelch repeat and BTB domain-containing protein	-4.69076	-2.22982	4.69076	down	chr13	-	41765710	41768702
AA457263	lincRNA-GPR61	-2.82762	-1.49959	2.82762	down	lincRNA	451	chr1	+	110072368	110072818	downstream	NM_000849	GSTM3	glutathione S-transferase Mu 3	-2.55931	-1.35575	2.55931	down	chr1	-	110276553	110283660
ENST00000428029	AC084018.1	-2.13597	-1.09489	2.13597	down	Ensembl	895	chr12	-	122233674	122240839	downstream	NM_032790	ORAI1	calcium release-activated calcium channel	2.95308	1.56222	2.95308	up	chr12	+	122064454	122079946
exon2751+	lincRNA-TPRA1-4	-3.20966	-1.68242	3.20966	down	lincRNA	101	chr3	+	126878038	126878138	upstream	NM_032343	CHCHD6	coiled-coil-helix-coiled-coil-helix	2.33835	1.22549	2.33835	up	chr3	+	126423117	126679244
ENST00000413983	RP11-410N8.3	-2.29469	-1.1983	2.29469	down	Ensembl	469	chr20	+	31148894	31161690	downstream	NM_012325	MAPRE1	microtubule-associated protein RP/EB family	2.14764	1.10275	2.14764	up	chr20	+	31407698	31438211
AK096322	lincRNA-FBRS	2.15157	1.10539	2.15157	up	lincRNA	2890	chr16	+	30671242	30682130	downstream	NM_001142544	CTF1	cardiotrophin-1 isoform 2	-4.04672	-2.01675	4.04672	down	chr16	+	30907927	30914881
AK131566	lincRNA-NR4A1	-3.49679	-1.80603	3.49679	down	lincRNA	3513	chr12	+	52431498	52453285	upstream	NM_001077401	ACVRL1	serine/threonine-protein kinase receptor R3	-2.29075	-1.19582	2.29075	down	chr12	+	52306112	52317145
CN412465	lincRNA-FGD2	-2.56295	-1.35781	2.56295	down	lincRNA	563	chr6	-	37103028	37103592	downstream	NM_016059	PPIL1	peptidyl-prolyl cis-trans isomerase-like 1	4.36346	2.12547	4.36346	up	chr6	-	36822605	36842800
AW167909	lincRNA-WRNIP1	-2.45647	-1.29659	2.45647	down	lincRNA	518	chr6	-	2812462	2812980	upstream	NM_000904	NQO2	ribosyldihydronicotinamide dehydrogenase	-3.16124	-1.66049	3.16124	down	chr6	+	3000066	3019994
uc002aqr.1	BC047537	-2.02487	-1.01783	2.02487	down	UCSC_knowngene	3969	chr15	-	67697735	67814182	downstream	NM_001145102	SMAD3	mothers against decapentaplegic homolog 3	-2.4488	-1.29208	2.4488	down	chr15	+	67418053	67487533
chrX:118607438-118617354+	lincRNA-CXorf56-3	-2.2555	-1.17345	2.2555	down	lincRNA	9917	chrX	+	118607438	118617354	downstream	NM_003336	UBE2A	ubiquitin-conjugating enzyme E2 A isoform 1	2.1498	1.1042	2.1498	up	chrX	+	118708498	118718379
BG619841	lincRNA-SLC25A5-3	-2.05895	-1.04191	2.05895	down	lincRNA	544	chrX	-	118610256	118610797	upstream	NM_003336	UBE2A	ubiquitin-conjugating enzyme E2 A isoform 1	2.1498	1.1042	2.1498	up	chrX	+	118708498	118718379
AK096322	lincRNA-FBRS	2.15157	1.10539	2.15157	up	lincRNA	2890	chr16	+	30671242	30682130	overlap	NM_001105079	FBRS	probable fibrosin-1	2.33341	1.22244	2.33341	up	chr16	+	30675777	30682131
uc003kwu.1	BX538252	2.22419	1.15328	2.22419	up	UCSC_knowngene	916	chr5	-	131701645	131705196	downstream	NM_003687	PDLIM4	PDZ and LIM domain protein 4 isoform 1	-2.79978	-1.48531	2.79978	down	chr5	+	131593350	131609147
ENST00000417795	AC034220.3	3.06106	1.61403	3.06106	up	Ensembl	1792	chr5	-	131646977	131705608	downstream	NM_003687	PDLIM4	PDZ and LIM domain protein 4 isoform 1	-2.79978	-1.48531	2.79978	down	chr5	+	131593350	131609147
AF083120		-2.44257	-1.2884	2.44257	down	misc_RNA	158	chr11	+	62321164	62321291	downstream	NM_173810	TTC9C	tetratricopeptide repeat protein 9C	2.22568	1.15425	2.22568	up	chr11	+	62495951	62506108
DQ269985	lincRNA-AKR1C3-2	2.98741	1.5789	2.98741	up	lincRNA	972	chr10	+	5005636	5149693	overlap	NM_003739	AKR1C3	aldo-keto reductase family 1 member C3	2.92034	1.54614	2.92034	up	chr10	+	5136567	5149878
AI201851	lincRNA-NFE2L3-3	-2.52874	-1.33842	2.52874	down	lincRNA	347	chr7	+	25988284	25988606	downstream	NM_016587	CBX3	chromobox protein homolog 3	2.73025	1.44903	2.73025	up	chr7	+	26241323	26253227
uc002cuc.2	BC013599	2.71715	1.44209	2.71715	up	UCSC_knowngene	1114	chr16	-	3178836	3182043	downstream	NM_024339	THOC6	THO complex subunit 6 homolog isoform 1	2.72289	1.44514	2.72289	up	chr16	+	3074031	3077756
ENST00000442418	RP11-86H7.1	-3.01691	-1.59307	3.01691	down	Ensembl	748	chr1	-	95104016	95285652	downstream	NM_001993	F3	tissue factor isoform 1 precursor	-2.58843	-1.37208	2.58843	down	chr1	-	94994731	95007413
ENST00000428029	AC084018.1	-2.13597	-1.09489	2.13597	down	Ensembl	895	chr12	-	122233674	122240839	upstream	NM_001024808	BCL7A	B-cell CLL/lymphoma 7 protein family member A	-2.24697	-1.16798	2.24697	down	chr12	+	122459860	122499950
chr2:238206264-238224402+	lincRNA-COL6A3-4	2.01519	1.01092	2.01519	up	lincRNA	18139	chr2	+	238206264	238224402	downstream	NM_022449	RAB17	ras-related protein Rab-17	-2.72421	-1.44584	2.72421	down	chr2	-	238482964	238499769
AF083120		-2.44257	-1.2884	2.44257	down	misc_RNA	158	chr11	+	62321164	62321291	downstream	NM_000327	ROM1	rod outer segment membrane protein 1	2.16549	1.11469	2.16549	up	chr11	+	62380212	62382592
uc002cuc.2	BC013599	2.71715	1.44209	2.71715	up	UCSC_knowngene	1114	chr16	-	3178836	3182043	downstream	NM_001012632	IL32	interleukin-32 isoform B	-3.82165	-1.9342	3.82165	down	chr16	+	3115662	3119668
DQ269985	lincRNA-AKR1C3-2	2.98741	1.5789	2.98741	up	lincRNA	972	chr10	+	5005636	5149693	overlap	NM_001353	AKR1C1	aldo-keto reductase family 1 member C1	2.13986	1.09752	2.13986	up	chr10	+	5005453	5020158
AW812672	lincRNA-MCPH1-1	-2.26064	-1.17673	2.26064	down	lincRNA	449	chr8	-	6559168	6563761	downstream	NM_001172574	MCPH1	microcephalin isoform 2	-3.27131	-1.70987	3.27131	down	chr8	+	6264112	6304940
CD000492	lincRNA-WISP3-2	-3.39659	-1.76409	3.39659	down	lincRNA	304	chr6	+	112311747	112312016	downstream	NM_001105206	LAMA4	laminin subunit alpha-4 isoform 1 precursor	19.3738	4.27604	19.3738	up	chr6	-	112429133	112575828
ENST00000420156	RP4-543J13.1	-2.10272	-1.07226	2.10272	down	Ensembl	332	chr1	+	114749048	114804900	upstream	NM_020190	OLFML3	olfactomedin-like protein 3 precursor	-3.34567	-1.7423	3.34567	down	chr1	+	114522029	114524875
uc001wkc.1	AX746599	-2.58621	-1.37084	2.58621	down	UCSC_knowngene	2524	chr14	+	23982557	24013485	downstream	NM_032452	JPH4	junctophilin-4	-2.08572	-1.06054	2.08572	down	chr14	-	24037243	24048009
NR_026862	PPP1R3E	-2.01162	-1.00836	2.01162	down	RefSeq_NR	4521	chr14	-	23765112	23772057	upstream	NM_032452	JPH4	junctophilin-4	-2.08572	-1.06054	2.08572	down	chr14	-	24037243	24048009
ENST00000421191	XXbac-BPG248L24.10	2.81979	1.49559	2.81979	up	Ensembl	306	chr6	-	31275591	31276326	upstream	NM_001011700	MCCD1	mitochondrial coiled-coil domain protein 1	-109.939	-6.78056	109.939	down	chr6	+	31496738	31498008
ENST00000392819	AC016732.2	3.08121	1.6235	3.08121	up	Ensembl	969	chr2	-	158067017	158067987	upstream	NM_014568	GALNT5	polypeptide N-acetylgalactosaminyltransferase 5	2.59872	1.3778	2.59872	up	chr2	+	158114339	158167913
CU692690	lincRNA-TNFRSF13C	-2.34034	-1.22672	2.34034	down	lincRNA	1342	chr22	+	42120333	42423168	downstream	NM_001002034	FAM109B	sesquipedalian-2	2.87154	1.52183	2.87154	up	chr22	+	42470254	42475442
uc002cuc.2	BC013599	2.71715	1.44209	2.71715	up	UCSC_knowngene	1114	chr16	-	3178836	3182043	downstream	NM_032296	FLYWCH1	FLYWCH-type zinc finger-containing protein 1	-3.91448	-1.96882	3.91448	down	chr16	+	2961979	3001209
chr6:27248371-27266346-	lincRNA-PRSS16	-2.03284	-1.0235	2.03284	down	lincRNA	17976	chr6	-	27248371	27266346	downstream	NM_005865	PRSS16	thymus-specific serine protease precursor	6.76783	2.75869	6.76783	up	chr6	+	27215501	27224399
DQ269985	lincRNA-AKR1C3-2	2.98741	1.5789	2.98741	up	lincRNA	972	chr10	+	5005636	5149693	downstream	NM_001818	AKR1C4	aldo-keto reductase family 1 member C4	3.33465	1.73753	3.33465	up	chr10	+	5238797	5260910
AF083120		-2.44257	-1.2884	2.44257	down	misc_RNA	158	chr11	+	62321164	62321291	upstream	NM_024060	AHNAK	neuroblast differentiation-associated protein	7.86324	2.97512	7.86324	up	chr11	-	62201015	62314332
BG896515	lincRNA-MAP3K9-2	-2.0044	-1.00317	2.0044	down	lincRNA	419	chr14	+	71150688	71151023	upstream	NM_003813	ADAM21	disintegrin and metalloproteinase	-2.59564	-1.37609	2.59564	down	chr14	+	70924216	70926622
DQ275636		-2.02983	-1.02136	2.02983	down	RNAdb	682	chr5	+	87972389	87973039	downstream	NM_001131005	MEF2C	myocyte-specific enhancer factor 2C isoform 2	-2.13245	-1.09251	2.13245	down	chr5	-	88014057	88199922
ENST00000513381	RP11-834C11.5	-2.59162	-1.37386	2.59162	down	Ensembl	499	chr12	-	54478915	54519614	downstream	NM_004503	HOXC6	homeobox protein Hox-C6 isoform 1	-2.59054	-1.37325	2.59054	down	chr12	+	54422193	54424607
AK299216	lincRNA-SKAP2-2	2.59185	1.37398	2.59185	up	lincRNA	1360	chr7	-	26709157	27034858	downstream	NM_013322	SNX10	sorting nexin-10 isoform 1	2.72185	1.44459	2.72185	up	chr7	+	26331514	26413949
AW269809	lincRNA-KPNA1	-2.84272	-1.50727	2.84272	down	lincRNA	382	chr3	-	122233924	122236198	upstream	NM_001146106	PARP9	poly [ADP-ribose] polymerase 9 isoform c	2.8975	1.53481	2.8975	up	chr3	-	122250619	122283194
ENST00000513381	RP11-834C11.5	-2.59162	-1.37386	2.59162	down	Ensembl	499	chr12	-	54478915	54519614	downstream	NM_153693	HOXC6	homeobox protein Hox-C6 isoform 2	-4.6112	-2.20514	4.6112	down	chr12	+	54410641	54424607
uc002nwh.1	DQ593116	-2.05786	-1.04115	2.05786	down	UCSC_knowngene	118	chr19	-	35306610	35306728	upstream	NM_020895	GRAMD1A	GRAM domain-containing protein 1A isoform 1	4.53445	2.18093	4.53445	up	chr19	+	35491245	35517373
Y00062	lincRNA-ATP6V1G3-2	3.40021	1.76562	3.40021	up	lincRNA	4597	chr1	+	198284952	198726330	overlap	NM_080921	PTPRC	receptor-type tyrosine-protein phosphatase C	-2.55179	-1.35151	2.55179	down	chr1	+	198608136	198726545
uc001stu.2	BC035381	-2.82195	-1.49669	2.82195	down	UCSC_knowngene	3099	chr12	-	68102828	68123221	downstream	NM_006482	DYRK2	dual specificity	-3.13417	-1.64808	3.13417	down	chr12	+	68042511	68056444
ENST00000429250	RP11-90J7.3	-2.50716	-1.32605	2.50716	down	Ensembl	607	chr10	+	80008496	80310446	upstream	NM_001142285	RPS24	40S ribosomal protein S24 isoform d	2.1646	1.1141	2.1646	up	chr10	+	79793517	79816571
AF088026		-3.80774	-1.92894	3.80774	down	RNAdb	703	chr1	+	173832385	173833077	upstream	NM_014458	KLHL20	kelch-like protein 20	-2.97406	-1.57243	2.97406	down	chr1	+	173684079	173755840
CR595169		2.22098	1.1512	2.22098	up	RNAdb	1493	chr1	-	173833394	173836186	downstream	NM_014458	KLHL20	kelch-like protein 20	-2.97406	-1.57243	2.97406	down	chr1	+	173684079	173755840
AW268874	lincRNA-PIBF1	-2.09912	-1.06978	2.09912	down	lincRNA	462	chr13	-	73596400	73596862	downstream	NM_024808	C13orf34	protein aurora borealis	2.18023	1.12448	2.18023	up	chr13	+	73302041	73330328
ENST00000513381	RP11-834C11.5	-2.59162	-1.37386	2.59162	down	Ensembl	499	chr12	-	54478915	54519614	downstream	NM_014212	HOXC11	homeobox protein Hox-C11	3.06041	1.61373	3.06041	up	chr12	+	54366909	54370203
EC495588	lincRNA-RCN2	3.62736	1.85892	3.62736	up	lincRNA	90	chr15	-	77271632	77272065	upstream	NM_003978	PSTPIP1	proline-serine-threonine phosphatase-interacting	-2.15212	-1.10576	2.15212	down	chr15	+	77287464	77329671
ENST00000421191	XXbac-BPG248L24.10	2.81979	1.49559	2.81979	up	Ensembl	306	chr6	-	31275591	31276326	upstream	NM_005007	NFKBIL1	NF-kappa-B inhibitor-like protein 1 isoform 1	-2.44078	-1.28734	2.44078	down	chr6	+	31515352	31526606
ENST00000441207	RP4-742C19.11	2.03206	1.02294	2.03206	up	Ensembl	421	chr22	+	39551529	39551950	downstream	NM_145731	SYNGR1	synaptogyrin-1 isoform 1b	2.01196	1.0086	2.01196	up	chr22	+	39745953	39774394
uc002cuc.2	BC013599	2.71715	1.44209	2.71715	up	UCSC_knowngene	1114	chr16	-	3178836	3182043	downstream	NM_001012636	IL32	interleukin-32 isoform D	-5.32985	-2.41409	5.32985	down	chr16	+	3115784	3119668
ENST00000428029	AC084018.1	-2.13597	-1.09489	2.13597	down	Ensembl	895	chr12	-	122233674	122240839	upstream	NM_001178003	WDR66	WD repeat-containing protein 66 isoform 2	-2.42341	-1.27704	2.42341	down	chr12	+	122356462	122409974
uc001znn.1	LOC729082	-2.65162	-1.40688	2.65162	down	UCSC_knowngene	1379	chr15	+	41576200	41601901	downstream	NM_016359	NUSAP1	nucleolar and spindle-associated protein 1	2.05643	1.04014	2.05643	up	chr15	+	41624925	41673248
AK021565		-2.34127	-1.22729	2.34127	down	RNAdb	1903	chr17	+	73599615	73601517	upstream	NM_004524	LLGL2	lethal(2) giant larvae protein homolog 2 isoform	-3.77992	-1.91836	3.77992	down	chr17	+	73521782	73571290
exon92-	lincRNA-DMBX1	-2.20041	-1.13777	2.20041	down	lincRNA	197	chr1	-	46992321	46992517	downstream	NM_003579	RAD54L	DNA repair and recombination protein RAD54-like	-4.1446	-2.05123	4.1446	down	chr1	+	46713366	46744145
exon95+	lincRNA-KNCN	-2.30384	-1.20404	2.30384	down	lincRNA	271	chr1	+	46997334	46997604	upstream	NM_003579	RAD54L	DNA repair and recombination protein RAD54-like	-4.1446	-2.05123	4.1446	down	chr1	+	46713366	46744145
CD000492	lincRNA-WISP3-2	-3.39659	-1.76409	3.39659	down	lincRNA	304	chr6	+	112311747	112312016	downstream	NM_001105208	LAMA4	laminin subunit alpha-4 isoform 3 precursor	16.2421	4.02167	16.2421	up	chr6	-	112574985	112575828
ENST00000470614	RP11-69M1.1	2.84935	1.51063	2.84935	up	Ensembl	315	chr12	-	8147365	8147680	upstream	NM_018416	FOXJ2	forkhead box protein J2	-2.34433	-1.22917	2.34433	down	chr12	+	8185358	8208118
chr1:29096302-29111760-	lincRNA-YTHDF2	-2.91357	-1.54279	2.91357	down	lincRNA	15459	chr1	-	29096302	29111760	downstream	NM_152304	RAB42	putative Ras-related protein Rab-42 isoform 2	100.646	6.65315	100.646	up	chr1	+	28918711	28921088
AB208948	lincRNA-STON2-2	-6.13022	-2.61594	6.13022	down	lincRNA	4302	chr14	-	81726999	81893748	downstream	NM_015859	GTF2A1	transcription initiation factor IIA subunit 1	-2.72582	-1.44669	2.72582	down	chr14	-	81646393	81687294
CV387322	lincRNA-SEL1L-3	-2.08514	-1.06014	2.08514	down	lincRNA	581	chr14	+	81889991	81890556	upstream	NM_015859	GTF2A1	transcription initiation factor IIA subunit 1	-2.72582	-1.44669	2.72582	down	chr14	-	81646393	81687294
uc001jxd.1	AK023445	2.56399	1.35839	2.56399	up	UCSC_knowngene	1860	chr10	+	77056147	77121436	upstream	NM_001174156	SAMD8	sphingomyelin synthase-related protein 1 isoform	2.18875	1.13011	2.18875	up	chr10	+	76871392	76941881
uc003kzj.2	BC032795	2.04243	1.03029	2.04243	up	UCSC_knowngene	1045	chr5	+	133842304	133844920	downstream	NM_014829	DDX46	probable ATP-dependent RNA helicase DDX46	2.00305	1.0022	2.00305	up	chr5	+	134094460	134166812
ENST00000414613	AC010733.8	2.04985	1.03552	2.04985	up	Ensembl	1231	chr2	-	61163953	61165184	upstream	NM_002618	PEX13	peroxisome biogenesis factor 13	2.20389	1.14005	2.20389	up	chr2	+	61244811	61279125
NR_033373	FLJ39534	-2.08542	-1.06034	2.08542	down	RefSeq_NR	2540	chr3	+	47205859	47285605	upstream	NM_000316	PTH1R	parathyroid hormone/parathyroid hormone-related	-4.13891	-2.04925	4.13891	down	chr3	+	46919235	46945289
uc003nih.2	BC033330	-2.38933	-1.25661	2.38933	down	UCSC_knowngene	2883	chr6	+	26569551	26574925	upstream	NM_001145008	BTN3A1	butyrophilin subfamily 3 member A1 isoform c	2.75989	1.46461	2.75989	up	chr6	+	26402464	26415444
AK021484	lincRNA-SYNPO2	-3.0737	-1.61998	3.0737	down	lincRNA	3422	chr4	+	119672345	119956974	overlap	NM_133477	SYNPO2	synaptopodin-2 isoform a	-2.85369	-1.51283	2.85369	down	chr4	+	119809995	119982402
CU692690	lincRNA-TNFRSF13C	-2.34034	-1.22672	2.34034	down	lincRNA	1342	chr22	+	42120333	42423168	upstream	NM_001469	XRCC6	X-ray repair cross-complementing protein 6	2.58488	1.3701	2.58488	up	chr22	+	42017294	42060052
AJ227862		3.50317	1.80866	3.50317	up	misc_RNA	457	chr5	+	102118475	102118934	downstream	NM_138766	PAM	peptidyl-glycine alpha-amidating monooxygenase	5.67806	2.5054	5.67806	up	chr5	+	102201526	102366808
chrX:118607438-118617354+	lincRNA-CXorf56-3	-2.2555	-1.17345	2.2555	down	lincRNA	9917	chrX	+	118607438	118617354	downstream	NM_001105576	ANKRD58	ankyrin repeat domain-containing protein 58	2.17552	1.12136	2.17552	up	chrX	+	118892575	118894165
BG619841	lincRNA-SLC25A5-3	-2.05895	-1.04191	2.05895	down	lincRNA	544	chrX	-	118610256	118610797	upstream	NM_001105576	ANKRD58	ankyrin repeat domain-containing protein 58	2.17552	1.12136	2.17552	up	chrX	+	118892575	118894165
ENST00000504402	RP11-367J11.3	-8.25577	-3.0454	8.25577	down	Ensembl	292	chr4	-	7096297	7105056	downstream	NM_153376	CCDC96	coiled-coil domain-containing protein 96	3.01668	1.59296	3.01668	up	chr4	-	7042575	7044728
uc002cuc.2	BC013599	2.71715	1.44209	2.71715	up	UCSC_knowngene	1114	chr16	-	3178836	3182043	downstream	NM_001012634	IL32	interleukin-32 isoform C	-3.6265	-1.85858	3.6265	down	chr16	+	3115638	3119668
ENST00000421191	XXbac-BPG248L24.10	2.81979	1.49559	2.81979	up	Ensembl	306	chr6	-	31275591	31276326	upstream	NM_001145466	NCR3	natural cytotoxicity triggering receptor 3	-2.45702	-1.29691	2.45702	down	chr6	-	31556659	31560762
ENST00000509266	AC026979.1	-3.08162	-1.62369	3.08162	down	Ensembl	1967	chr8	-	30044816	30047775	upstream	NM_001008710	RBPMS	RNA-binding protein with multiple splicing	-2.89055	-1.53134	2.89055	down	chr8	+	30241943	30429734
AW274645	lincRNA-PPP2R5C-1	-2.13367	-1.09334	2.13367	down	lincRNA	367	chr14	-	102415403	102416162	upstream	NM_181291	WDR20	WD repeat-containing protein 20 isoform 1	-2.00539	-1.00388	2.00539	down	chr14	+	102606211	102690010
ENST00000504402	RP11-367J11.3	-8.25577	-3.0454	8.25577	down	Ensembl	292	chr4	-	7096297	7105056	downstream	NM_025196	GRPEL1	grpE protein homolog 1, mitochondrial precursor	3.63585	1.86229	3.63585	up	chr4	-	7061779	7069800
chr2:113359154-113374304-	lincRNA-CHCHD5-1	-2.58783	-1.37174	2.58783	down	lincRNA	15151	chr2	-	113359154	113374304	downstream	NM_198581	ZC3H6	zinc finger CCCH domain-containing protein 6	-2.3339	-1.22274	2.3339	down	chr2	+	113033177	113097640
BG898852	lincRNA-RAB3IP	4.49015	2.16676	4.49015	up	lincRNA	605	chr12	-	70474248	70474753	upstream	NM_014505	KCNMB4	calcium-activated potassium channel subunit	-4.54952	-2.18571	4.54952	down	chr12	+	70760061	70824978
AK021565		-2.34127	-1.22729	2.34127	down	RNAdb	1903	chr17	+	73599615	73601517	upstream	NM_014738	KIAA0195	hypothetical protein LOC9772	-2.32825	-1.21924	2.32825	down	chr17	+	73452663	73496533
ENST00000441207	RP4-742C19.11	2.03206	1.02294	2.03206	up	Ensembl	421	chr22	+	39551529	39551950	upstream	NM_001006666	APOBEC3F	DNA dC->dU-editing enzyme APOBEC-3F isoform b	2.97594	1.57335	2.97594	up	chr22	+	39436672	39440428
NR_033315	BDNFOS	-2.36069	-1.23921	2.36069	down	RefSeq_NR	1437	chr11	+	27528398	27719716	upstream	NM_030771	CCDC34	coiled-coil domain-containing protein 34 isoform	2.83645	1.50409	2.83645	up	chr11	-	27360060	27384795
chr20:541348-562112+	lincRNA-TCF15	-3.53535	-1.82185	3.53535	down	lincRNA	20765	chr20	+	541348	562112	upstream	NM_031229	RBCK1	ranBP-type and C3HC4-type zinc finger-containing	2.33554	1.22376	2.33554	up	chr20	+	388708	411610
ENST00000494283	RP11-58E21.1	-2.38946	-1.25669	2.38946	down	Ensembl	713	chr14	+	50519574	50520287	upstream	NM_014315	KLHDC2	kelch domain-containing protein 2	-2.24163	-1.16455	2.24163	down	chr14	+	50234786	50249856
chr2:113359154-113374304-	lincRNA-CHCHD5-1	-2.58783	-1.37174	2.58783	down	lincRNA	15151	chr2	-	113359154	113374304	upstream	NM_173204	IL1F7	interleukin-1 family member 7 isoform 4	-2.23867	-1.16264	2.23867	down	chr2	+	113670547	113676458
chr20:541348-562112+	lincRNA-TCF15	-3.53535	-1.82185	3.53535	down	lincRNA	20765	chr20	+	541348	562112	upstream	NM_021158	TRIB3	tribbles homolog 3	72.9646	6.18912	72.9646	up	chr20	+	361307	378203
uc003tbd.2	BC041636	2.70832	1.4374	2.70832	up	UCSC_knowngene	1130	chr7	-	30555927	30601744	upstream	NM_002047	GARS	glycyl-tRNA synthetase	6.30349	2.65615	6.30349	up	chr7	+	30634180	30673648
ENST00000498198	RP11-428G5.1	2.1228	1.08597	2.1228	up	Ensembl	289	chr12	+	32050753	32051042	downstream	NM_001003398	BICD1	protein bicaudal D homolog 1 isoform 2	4.7716	2.25447	4.7716	up	chr12	+	32260184	32531141
ENST00000421191	XXbac-BPG248L24.10	2.81979	1.49559	2.81979	up	Ensembl	306	chr6	-	31275591	31276326	upstream	NM_006674	HCP5	HLA class I histocompatibility antigen protein	2.16039	1.11129	2.16039	up	chr6	+	31430956	31433586
chr9:87653896-87666946-	lincRNA-NTRK2	-2.16446	-1.11401	2.16446	down	lincRNA	13051	chr9	-	87653896	87666946	downstream	NM_001007097	NTRK2	BDNF/NT-3 growth factors receptor isoform b	-13.8676	-3.79365	13.8676	down	chr9	+	87284625	87430621
chr1:39116163-39128263+	lincRNA-RRAGC-1	-3.76704	-1.91343	3.76704	down	lincRNA	12101	chr1	+	39116163	39128263	downstream	NM_022157	RRAGC	ras-related GTP-binding protein C	3.05836	1.61276	3.05836	up	chr1	-	39305014	39325340
uc010bol.1	AK307134	-2.83612	-1.50392	2.83612	down	UCSC_knowngene	2009	chr15	-	96812000	96870577	upstream	NM_021005	NR2F2	COUP transcription factor 2 isoform a	-2.1322	-1.09235	2.1322	down	chr15	+	96874110	96883492
N80091	lincRNA-SPATA8-3	-2.04506	-1.03214	2.04506	down	lincRNA	436	chr15	+	96886179	96888182	upstream	NM_021005	NR2F2	COUP transcription factor 2 isoform a	-2.1322	-1.09235	2.1322	down	chr15	+	96874110	96883492
AW812672	lincRNA-MCPH1-1	-2.26064	-1.17673	2.26064	down	lincRNA	449	chr8	-	6559168	6563761	upstream	NM_005218	DEFB1	beta-defensin 1 preproprotein	-4.30849	-2.10718	4.30849	down	chr8	-	6728096	6735529
ENST00000470614	RP11-69M1.1	2.84935	1.51063	2.84935	up	Ensembl	315	chr12	-	8147365	8147680	upstream	NM_018088	FAM90A1	hypothetical protein LOC55138	2.99578	1.58293	2.99578	up	chr12	-	8373855	8380214
CD000492	lincRNA-WISP3-2	-3.39659	-1.76409	3.39659	down	lincRNA	304	chr6	+	112311747	112312016	downstream	NM_001105209	LAMA4	laminin subunit alpha-4 isoform 3 precursor	4.5656	2.19081	4.5656	up	chr6	-	112574985	112575828
BX110954	lincRNA-ZNF572-1	-2.05239	-1.0373	2.05239	down	lincRNA	620	chr8	+	125860978	125862459	downstream	NM_003129	SQLE	squalene monooxygenase	2.713	1.43989	2.713	up	chr8	+	126010719	126034525
uc002cuc.2	BC013599	2.71715	1.44209	2.71715	up	UCSC_knowngene	1114	chr16	-	3178836	3182043	downstream	NM_001142350	THOC6	THO complex subunit 6 homolog isoform 2	4.39239	2.13501	4.39239	up	chr16	+	3074031	3077756
