# Supplementary material for: LncRNAs Expression Signatures of Renal Clear Cell Carcinoma Revealed by Microarray
Source: PLoS One. 2012 Aug 6;7(8):e42377. doi: 10.1371/journal.pone.0042377 (PMC3412851; doi:10.1371/journal.pone.0042377)
Supplement: Table S11 — mRNAs Expression Profiling Data. (XLS) [file pone.0042377.s011.xls]

## Sheet: All Targets Value - mRNAs
	Raw Intensities												Normalized Intensities												Annotations
ProbeName	[103N](raw)	[103T](raw)	[104N](raw)	[104T](raw)	[109N](raw)	[109T](raw)	[110N](raw)	[110T](raw)	[119N](raw)	[119T](raw)	[120N](raw)	[120T](raw)	[103N](normalized)	[103T](normalized)	[104N](normalized)	[104T](normalized)	[109N](normalized)	[109T](normalized)	[110N](normalized)	[110T](normalized)	[119N](normalized)	[119T](normalized)	[120N](normalized)	[120T](normalized)	type	seqname	GeneSymbol	source	RNAlength	chrom	strand	txStart	txEnd	Xhyb	probeSeq	EntrezID	unigene	GO	ProteinAccession	product
ASHG19A3A052390	689.898	638.371	443.147	524.501	814.509	1047.11	533.701	460.145	963.513	1310.98	762.541	739.477	9.29945	9.38471	8.92593	9.4842	9.66972	9.8543	9.13803	9.58873	9.3208	10.282	9.341	9.27654	coding	NM_005697	SCAMP2	RefSeq_coding	1313	chr15	-	75137196	75165670		TTGGATTGCAGCCCTGTCTACACTGGATAATCATTCCCTGGCCATATCAGTCATCATGAT	10066	Hs.458917	GO:0005515|GO:0006892|GO:0015031|GO:0005794|GO:0005768|GO:0016021|GO:0043231|GO:0016020|GO:0005730|GO:0005634|GO:0055038|GO:0032588	NP_005688	Secretory carrier membrane protein 2
ASHG19A3A005781	1849.25	1637.65	1785.7	1060.56	1535.6	1946.71	1505.53	954.253	2397.05	1843.57	2444.19	2685.41	10.7252	10.7335	10.8937	10.4165	10.6197	10.7428	10.6839	10.5539	10.7659	10.7587	11.0435	11.2067	coding	NM_130800	MEN1	RefSeq_coding	2748	chr11	-	64570995	64578035		CCTAGTGTGGGATGTAAGCGCGGAGGCCGCCGCCCACCGCCCGCCGCCATGGGGCTGAAG	4221	Hs.423348	GO:0070412|GO:0000403|GO:0003690|GO:0000400|GO:0018024|GO:0047485|GO:0005515|GO:0006281|GO:0000165|GO:0007420|GO:0034968|GO:0046329|GO:0045786|GO:0008285|GO:0045736|GO:0001933|GO:0043433|GO:0051974|GO:0000122|GO:0030511|GO:0032925|GO:0006974|GO:0009411|GO:0010332|GO:0000785|GO:0032154|GO:0005737|GO:0005829|GO:0035097|GO:0035097|GO:0016363|GO:0005730|GO:0005634|GO:0043234|GO:0005625	NP_570716	Multiple endocrine neoplasia I
ASHG19A3A047831	1763.53	3348.09	902.078	438.276	917.346	2460.32	1377	476.264	2307.42	3527.67	895.393	810.744	10.6515	11.7227	9.91956	9.23816	9.8494	11.0676	10.5539	9.64296	10.707	11.6862	9.55575	9.41515	coding	NM_001321	CSRP2	RefSeq_coding	901	chr12	-	77252495	77272799		AAGTGTTCCAGATGTGGGGATTCTGTATATGCTGCCGAGAAGATAATTGGAGCTGGAAAG	1466	Hs.530904	GO:0046872|GO:0003674|GO:0008270|GO:0030154|GO:0007275|GO:0045445|GO:0005634	NP_001312	Cysteine and glycine-rich protein 2
ASHG19A3A052312	286.693	220.956	235.872	114.041	504.954	661.627	319.763	39.0554	788.375	376.007	320.268	430.442	8.03914	7.77961	8.05353	7.27728	8.98386	9.19034	8.39139	6.06272	9.03327	8.42908	8.1549	8.44483	coding	NM_033429	CALML4	RefSeq_coding	4655	chr15	-	68483043	68498448		TATGACAAGCAGCAGAGGGGGAAGATAAAAGCCACCGACCTCATGGTGGCCATGAGGTGC	91860	Hs.709550	GO:0005509	NP_219501	Calmodulin-like 4
ASHG19A3A029765	553.055	1001.58	218.161	281.303	278.836	2216.91	400.265	92.8103	439.009	776.22	325.191	1630.78	8.98206	10.061	7.95133	8.6154	8.11709	10.9231	8.73477	7.34432	8.18028	9.51587	8.1718	10.4949	coding	NM_148919	PSMB8	RefSeq_coding	1135	chr6	-	32808496	32811816		CCAGGACACTACAGTTTCTCTATGCGATCTCCAGAGCTCGCTTTACCCCGGGGAATGCAG	5696	Hs.180062	GO:0008233|GO:0005515|GO:0004298|GO:0006977|GO:0000082|GO:0000216|GO:0016070|GO:0000084|GO:0031145|GO:0031145|GO:0006915|GO:0000075|GO:0034641|GO:0019221|GO:0044419|GO:0016071|GO:0000278|GO:0051436|GO:0051437|GO:0051603|GO:0042981|GO:0006521|GO:0051439|GO:0060337|GO:0016032|GO:0005737|GO:0005634|GO:0000502|GO:0005839	NP_683720	Proteasome (prosome, macropain) subunit, beta type, 8 (large multifunctional peptidase 7)
ASHG19A3A025431	423.614	1048.73	284.887	232.778	439.593	1012.08	647.304	142.559	668.711	973.881	351.754	872.22	8.59186	10.1267	8.31692	8.34482	8.77825	9.80783	9.42109	7.97521	8.78964	9.86065	8.28258	9.53309	coding	NM_016009	SH3GLB1	RefSeq_coding	6373	chr1	+	87170256	87213866		AACTTTTGGGACAATATATGATTGATGCAGGGACTGAGTTTGGCCCAGGAACAGCTTATG	51100	Hs.136309	GO:0017124|GO:0008093|GO:0008289|GO:0005515|GO:0042803|GO:0006916|GO:0006915|GO:0046847|GO:0007165|GO:0005794|GO:0000139|GO:0005737|GO:0016020|GO:0005741|GO:0005739	NP_057093	SH3-domain GRB2-like endophilin B1
ASHG19A3A046708	190.95	198.221	135.757	52.4354	209.539	238.585	220.504	87.0064	310.718	183.288	194.351	438.63	7.46614	7.61395	7.31291	6.07446	7.70249	7.68259	7.86014	7.24904	7.69141	7.38175	7.48347	8.47653	coding	NM_001099653	FAM86C	RefSeq_coding	2106	chr11	+	71498556	71512276	uc003dpr.3,NR_024363,NR_024362,NR_024361,NR_024254,NR_024253,NR_024241,NR_003494,NM_201598,NM_201400,NM_001137610,NM_001083537,ENST00000509817,ENST00000484945,ENST00000478302,ENST00000340703,	GTGAAGCACCCGCCGTCAGTCAAGTATGCCCGGTGCTTTCTCTCAGAACTCATCAAAAAG	55199	Hs.567527		NP_689776	Family with sequence similarity 86, member C
ASHG19A3A025127	96.8921	102.05	80.2733	71.2047	77.9941	101.168	78.6061	62.8317	97.8481	114.962	68.9206	99.2864	6.48671	6.57199	6.58413	6.55044	6.31537	6.4344	6.37434	6.76528	6.11669	6.7052	6.12838	6.19672	coding	NM_182524	ZNF595	RefSeq_coding	2894	chr4	+	53226	88099		GTTCCATATTTATCTTTGAACATGTAGCATCTCTTTCCGCAAATAAATGCAGACTTTGGT	152687	Hs.709469	GO:0003677|GO:0046872|GO:0008270|GO:0006355|GO:0005622|GO:0005634	NP_872330	Zinc finger protein 595
ASHG19A3A013697	2803.79	6900.21	2702.69	2226.5	3504.92	5048.34	3973.74	4825.28	6843.23	8675.63	3246.17	9080.01	11.3398	12.7295	11.5087	11.387	11.8931	12.122	12.2046	12.5967	12.4543	12.9799	11.4656	12.9019	coding	NM_006430	CCT4	RefSeq_coding	2349	chr2	-	62095262	62115791		AACAGAACTAAGAAACCGGCATGCCCAGGGAGAAAAAACTGCAGGCATTAATGTCCGAAA	10575	Hs.421509	GO:0005524|GO:0000166|GO:0051082|GO:0051084|GO:0044267|GO:0006457|GO:0005832|GO:0005737|GO:0005737|GO:0005856|GO:0005829|GO:0042470|GO:0005815|GO:0005730|GO:0005634	NP_006421	Chaperonin containing TCP1, subunit 4 (delta)
ASHG19A3A006787	270.773	142.848	263.923	239.377	326.309	141.877	262.844	177.375	625.357	196.584	357.52	375.057	7.95036	7.08374	8.20764	8.38441	8.34991	6.92087	8.11397	8.28628	8.68917	7.48907	8.30652	8.23163	coding	NM_018896	CACNA1G	RefSeq_coding	7825	chr17	+	48638448	48704431	NM_198396,	CAGCCTGGGAGGCTCCGACCCACAGATCCCTCTAGCTGAGATGGAGGCTCTGTCTCTGAC	8913	Hs.591169	GO:0008332|GO:0005244|GO:0007411|GO:0006811|GO:0055085|GO:0006810|GO:0016021|GO:0016020|GO:0005891	NP_938407	Calcium channel, voltage-dependent, T type, alpha 1G subunit
ASHG19A3A003996	442.685	309.356	361.995	263.644	465.53	393.104	435.631	269.704	1113.04	530.809	770.292	641.146	8.65331	8.283	8.63812	8.53028	8.86277	8.4122	8.85458	8.87151	9.53309	8.9423	9.35398	9.05731	coding	NM_002194	INPP1	RefSeq_coding	2035	chr2	+	191208195	191236390		TGCTCTGTCCTCATCCCCGGCTTAGCTGACGGCCCAGAGGGTGGGTGCCAATTCCACCAG	3628	Hs.32309	GO:0016787|GO:0004437|GO:0004441|GO:0046872|GO:0006796|GO:0007165	NP_002185	Inositol polyphosphate-1-phosphatase
ASHG19A3A004480	9731.87	14305.1	8260.54	9616.43	9247.1	19320.8	10790.2	19990	11642.9	21405	10555.6	13544.7	13.2029	13.6235	13.207	13.3633	13.4012	14.0256	13.711	14.3131	13.3061	14.1834	13.2738	13.4549	coding	NM_006263	PSME1	RefSeq_coding	1012	chr14	+	24605377	24608175		GGTCATGGAGATCCGCAATGCTTATGCTGTGTTATATGACATCATCCTGAAGAACTTCGA	5720	Hs.75348	GO:0006977|GO:0000082|GO:0000216|GO:0016070|GO:0000084|GO:0031145|GO:0031145|GO:0006915|GO:0000075|GO:0034641|GO:0016071|GO:0000278|GO:0051436|GO:0051437|GO:0042981|GO:0006521|GO:0051439|GO:0016032|GO:0005737|GO:0008537|GO:0000502	NP_788955	Proteasome (prosome, macropain) activator subunit 1 (PA28 alpha)
ASHG19A3A012575	1058.26	1261.91	730.634	1122.8	1208.4	1449.72	876.939	323.583	1206.55	843.314	1038.28	1456.38	9.9215	10.3799	9.61133	10.4987	10.2549	10.3103	9.86986	9.12041	9.65001	9.64481	9.76356	10.321	coding	NM_172341	PSENEN	RefSeq_coding	678	chr19	+	36236493	36237903		GGTTCTTCCGAGAGGCCTTCCTTGTCCCAGCCTACACAGAACAGAGCCAAATCAAAGGCT	55851	Hs.534465	GO:0004190|GO:0004175|GO:0008233|GO:0005515|GO:0007220|GO:0007219|GO:0042987|GO:0006915|GO:0008624|GO:0006509|GO:0031293|GO:0048011|GO:0043085|GO:0016485|GO:0005794|GO:0032580|GO:0005783|GO:0005789|GO:0005887|GO:0005886|GO:0005886	NP_758844	Presenilin enhancer 2 homolog (C. elegans)
ASHG19A3A029866	1505.23	788.677	1254.55	813.673	1121.51	1252.74	973.59	622.068	1850.08	1041.02	1522.45	1400.45	10.4269	9.70746	10.3814	10.0622	10.1434	10.0961	10.0269	10.003	10.3441	9.94852	10.3135	10.2625	coding	NM_001135105	KCNK16	RefSeq_coding	1412	chr6	-	39282474	39290330		TTTGCCTCTCCCATCATCCAACAGCAAGTGGGCTCCTATGTGGCTGGGTTCCTCTGCACA	83795	Hs.287765	GO:0005267|GO:0005244|GO:0006811|GO:0071805|GO:0006813|GO:0016021|GO:0016020	NP_115491	Potassium channel, subfamily K, member 16
ASHG19A3A014689	245.949	331.399	314.775	304.46	288.947	257.193	268.481	209.723	463.813	296.468	298.825	441.507	7.81094	8.39402	8.45026	8.73532	8.17129	7.79628	8.14248	8.51604	8.25596	8.08831	8.06311	8.48807	coding	NM_016953	PDE11A	RefSeq_coding	9285	chr2	-	178487978	178937482		AGATATCTCCAATGACCTTGACCTCACCAGCCTGAGCTACAAGATTCTCATCTTTGTCTG	50940	Hs.570273	GO:0004115|GO:0047555|GO:0004114|GO:0004112|GO:0016787|GO:0046872|GO:0007596|GO:0030168|GO:0007165|GO:0005575|GO:0005737|GO:0005829|GO:0005829	NP_058649	Phosphodiesterase 11A
ASHG19A3A001749	86.1058	66.2813	89.7354	50.1873	115.316	80.7369	93.4773	46.3392	194.984	82.9577	136.072	146.493	6.32281	5.9023	6.73634	6.00111	6.87115	6.10181	6.6278	6.30641	7.04692	6.23194	7.02247	6.79075	coding	NM_001099696	REPIN1	RefSeq_coding	2987	chr7	+	150065878	150071133		CGGGCGCCGCGTCCCTGCACAGCCCGCCGCAGAGCAGAGGAAGAACCGATGCTGGAACGT	29803	Hs.647086	GO:0003677|GO:0046872|GO:0008270|GO:0006260|GO:0005622|GO:0005664|GO:0005634	NP_055189	Replication initiator 1
ASHG19A3A029678	267.934	66.3498	185.116	57.0492	114.615	42.4458	101.365	42.6365	132.31	71.2661	99.1723	60.0912	7.93332	5.90436	7.71742	6.20254	6.8624	5.15594	6.74242	6.18612	6.51572	6.01369	6.609	5.41083	coding	NM_205854	SFTA2	RefSeq_coding	462	chr6	-	30899127	30899952		AAGATCTCAACACCATGTTGTCTGCAACACATGACAGCCATTGAAGCCTGTGTCCTTCTT	389376	Hs.211267	GO:0005576	NP_995326	Surfactant associated 2
ASHG19A3A042525	174.673	140.858	106.887	136.714	140.877	136.548	207.225	474.998	186.504	145.112	123.672	166.354	7.34162	7.06514	6.9774	7.557	7.13881	6.86405	7.77219	9.63895	6.98425	7.03951	6.89713	6.98732	coding	NM_005028	PIP4K2A	RefSeq_coding	3833	chr10	-	22823766	23003503		AGAAAACATGCCGAGCCATTTCAAGTTTAAGGAATACTGCCCGATGGTCTTCCGTAACCT	5305	Hs.57079	GO:0016308|GO:0016309|GO:0005524|GO:0016301|GO:0000166|GO:0016740|GO:0016310|GO:0005575	NP_005019	Phosphatidylinositol-5-phosphate 4-kinase, type II, alpha
ASHG19A3A021548	195.665	180.506	218.289	184.417	222.475	232.226	209.542	146.379	296.624	248.423	247.761	288.957	7.49951	7.45766	7.95221	8.00209	7.79436	7.6397	7.78666	8.01421	7.62744	7.83798	7.8152	7.83068	coding	NM_007354	C3orf27	RefSeq_coding	2700	chr3	-	128290843	128294929		AACTTCTGTCCCATTTTTCAGAGCTAAAGTGACAAGCCACATCCACGTCCCTGGTTAAAG	23434	Hs.194283		NP_031380	Chromosome 3 open reading frame 27
ASHG19A3A001644	98.9891	88.7008	111.749	102.896	172.064	127.41	112.399	92.2963	188.125	124.699	122.794	162.621	6.51661	6.35684	7.04181	7.12585	7.42452	6.761	6.89514	7.33462	6.99602	6.83046	6.88815	6.95033	coding	NM_001097589	SPRR3	RefSeq_coding	918	chr1	+	152974222	152976331		GAACACCTCGACCTTCTCTGCACAGCAGGTCCAGCATCCTTTGAAGCATGAGTTCTTACC	6707	Hs.139322	GO:0005515|GO:0005198|GO:0008544|GO:0031424|GO:0030216|GO:0018149|GO:0042060|GO:0005737	NP_005407	Small proline-rich protein 3
ASHG19A3A026957	230.252	168.961	204.407	175.656	235.987	243.377	218.733	130.174	313.976	213.337	230.244	293.15	7.72169	7.35741	7.8593	7.93171	7.87764	7.71366	7.84811	7.83573	7.70441	7.61283	7.71266	7.85393	coding	NM_005713	COL4A3BP	RefSeq_coding	5395	chr5	-	74666928	74807454	NM_001130105,	TTCCTCCATGTCTTCCATTGATCTAGTCAGTGCCTCTGATGATGTTCACAGATTCAGCTC	10087	Hs.270437	GO:0097001|GO:0070273|GO:0005515|GO:0004672|GO:0035621|GO:0000902|GO:0008283|GO:0006672|GO:0007029|GO:0003007|GO:0006955|GO:0001701|GO:0055088|GO:0006869|GO:0070584|GO:0006936|GO:0006468|GO:0034976|GO:0007165|GO:0006665|GO:0006810|GO:0005794|GO:0005737|GO:0005829|GO:0005783|GO:0005789|GO:0005789|GO:0005739|GO:0048471	NP_112729	Collagen, type IV, alpha 3 (Goodpasture antigen) binding protein
ASHG19A3A000850	656.239	817.502	735.461	356.513	1040.14	897.206	662.373	290.337	1559.2	577.467	918.687	1184.81	9.22734	9.75535	9.62243	8.95686	10.026	9.63895	9.4557	8.97255	10.061	9.06198	9.59206	10.0195	coding	NM_001007229	SPOP	RefSeq_coding	2982	chr17	-	47676247	47755525		CAGCAGCTGTCGCCGCCGCTCTCAGAGATTTCCTGTTAGACAAGACAAATTAGAGTTTTC	8405	Hs.463382	GO:0005515|GO:0006397|GO:0005634	NP_003554	Speckle-type POZ protein
ASHG19A3H0000507	130.701	111.353	142.632	109.049	141.571	132.394	139.299	112.282	196.535	123.169	133.134	154.333	6.92124	6.69947	7.37918	7.21224	7.14516	6.81854	7.20459	7.62537	7.05963	6.81226	6.99469	6.86932	coding	NM_153693_intron1-	NM_153693	HOX cluster	11160	chr12	-	54411198	54422359		AGGATAAGGAAGGGTTAGTGAAGTAGGAATTCATCCCTTTGCCTTTACCTGGTCGGTCTA
ASHG19A3A014892	2004.19	5942.09	2210.05	2873.76	1843.61	2774.48	2298.8	1986.73	2521.33	5977.51	1856.1	2595.4	10.8461	12.5237	11.1986	11.7156	10.9095	11.2444	11.3419	11.4813	10.8457	12.4462	10.6097	11.1532	coding	NM_213589	RAPH1	RefSeq_coding	9615	chr2	-	204298540	204400058		GTAATGGCTTAGCACACTAGTCGTACAGTCAGTGTAAATGTTTTTCATTTACATGTTTTC	65059	Hs.471162	GO:0007160|GO:0007165|GO:0005737|GO:0005856|GO:0030175|GO:0030027|GO:0005634|GO:0005886	NP_998754	Ras association (RalGDS/AF-6) and pleckstrin homology domains 1
ASHG19A3A008639	693.729	1539.46	623.469	543.475	719.757	1220.53	742.042	474.813	1471.28	1916.93	716.426	1123.75	9.3087	10.6421	9.38966	9.53009	9.49613	10.0615	9.62304	9.63839	9.96387	10.816	9.24859	9.93743	coding	NM_001001998	EXOSC10	RefSeq_coding	2834	chr1	-	11126677	11159938		GGACACCGTGCTCCCGTCTCTCAGGCAGCGAAGTTCGATCCATCAACCAAAATCTATGAA	5394	Hs.632368	GO:0008408|GO:0003723|GO:0004532|GO:0016787|GO:0042802|GO:0000166|GO:0005515|GO:0004674|GO:0071034|GO:0006396|GO:0044237|GO:0071044|GO:0000460|GO:0071028|GO:0071035|GO:0071048|GO:0000956|GO:0000184|GO:0006139|GO:0005737|GO:0005622|GO:0000176|GO:0005730|GO:0005634|GO:0035327	NP_002676	Exosome component 10
ASHG19A3A050844	1833.81	2552.87	1312.43	152.782	2893.04	3608.48	2438.6	954.106	3500.43	4682.47	2433.93	1565.23	10.7096	11.3635	10.4407	7.7214	11.5901	11.6299	11.437	10.5534	11.385	12.0947	11.0326	10.4385	coding	NM_016029	DHRS7	RefSeq_coding	1404	chr14	-	60611501	60632211		TTGCCCAGGACCTGTGCAATCAAATATTGTGGAGAATTCCCTAGCTGGAGAAGTCACAAA	51635	Hs.59719	GO:0005488|GO:0016491|GO:0055114	NP_057113	Dehydrogenase/reductase (SDR family) member 7
ASHG19A3A008966	95.6431	100.866	98.4694	97.086	94.3447	105.709	75.1639	70.7006	117.332	88.0884	88.4463	123.964	6.47145	6.55391	6.86417	7.04109	6.58813	6.49696	6.31385	6.94065	6.35748	6.31811	6.45802	6.54022	coding	NM_012352	OR1A2	RefSeq_coding	930	chr17	+	3100812	3101742		GTGATAACTGTGATGTATGTGGCAGTGACCCCAGCATTAAATCCTTTCATCTATAGTCTG	26189	Hs.532660	GO:0004984|GO:0004872|GO:0050896|GO:0007608|GO:0016021|GO:0005886	NP_036484	Olfactory receptor, family 1, subfamily A, member 2
ASHG19A3A020724	202.086	151.517	103.065	30.22	241.711	184.337	146.794	20.7679	193.794	166.726	147.168	154.298	7.5444	7.18495	6.92774	5.19577	7.91293	7.30486	7.27356	5.13482	7.0378	7.24409	7.12571	6.86832	coding	NM_002880	RAF1	RefSeq_coding	3291	chr3	-	12625101	12705700		AGTGATGCTGTCCACTCGGATTGGGTCAGGCTCTTTTGGAACTGTTTATAAGGGTAAATG	5894	Hs.159130	GO:0005524|GO:0016301|GO:0046872|GO:0000166|GO:0005515|GO:0004672|GO:0004674|GO:0005057|GO:0016740|GO:0000165|GO:0007265|GO:0000186|GO:0006915|GO:0007411|GO:0007596|GO:0008283|GO:0007173|GO:0008286|GO:0008285|GO:0048011|GO:0016310|GO:0030168|GO:0033138|GO:0006468|GO:0007165|GO:0007264|GO:0007268|GO:0005829|GO:0005829|GO:0005741|GO:0005886	NP_002871	V-raf-1 murine leukemia viral oncogene homolog 1
CUST_48_PI426249100	103.333	54.7054	92.4996	75.5973	97.757	97.9595	79.2093	40.4049	117.946	72.763	84.6917	93.092	6.58074	5.61112	6.77906	6.64322	6.63787	6.38545	6.38449	6.11109	6.36468	6.04747	6.39742	6.09375	coding	NM_021193_Exon1+	NM_021193	HOX cluster	574	chr2	+	176964529	176965103	NM_021193,	AATCTGCAGTCGCCAGACTCTTTCTACTTCTCCAACCTGAGGCCGAATGGCGGCCAGTTG
ASHG19A3A012692	18105.1	18739.6	15232.7	14339.8	25499.3	23661.8	13808	10581.9	22202.5	17805.1	22723.4	19946.7	14.2121	13.9047	14.1978	13.9475	15.0544	14.2873	14.0704	13.5152	14.3934	13.9595	14.6362	13.9475	coding	NM_001042544	LTBP4	RefSeq_coding	5163	chr19	+	41103140	41135725		GCCGCCGCCCCCTCCTGCTGGTGCTGTTGCTGCCGCTCTTCGCAGCCGCCACCTCCGCCG	8425	Hs.466766	GO:0005488|GO:0005509|GO:0005539|GO:0005178|GO:0050431|GO:0005024|GO:0030252|GO:0046879|GO:0007275|GO:0006457|GO:0045595|GO:0001558|GO:0030162|GO:0017015|GO:0031012|GO:0005576|GO:0005615|GO:0005578	NP_003564	Latent transforming growth factor beta binding protein 4
ASHG19A3A045732	75.6106	51.0276	84.6073	77.4527	73.6592	83.8637	76.6391	53.2535	116.329	58.642	77.797	258.413	6.13338	5.50496	6.65441	6.6847	6.23689	6.16172	6.34009	6.51736	6.34472	5.72119	6.28612	7.66892	coding	NM_020693	DSCAML1	RefSeq_coding	6899	chr11	-	117298488	117667976		TCAGTGCAGGAATATGTTAGCGTTGTATCTTGGGAGAAAGACACAGTCTCCATCATCCCA	57453	Hs.659513	GO:0042803|GO:0007409|GO:0007420|GO:0001709|GO:0007417|GO:0070593|GO:0009953|GO:0048704|GO:0007156|GO:0007162|GO:0009986|GO:0016021|GO:0005886	NP_065744	Down syndrome cell adhesion molecule like 1
ASHG19A3A047748	371.319	328.546	331.487	308.206	297.001	388.471	244.397	229.014	481.572	429.583	429.839	495.523	8.4113	8.37996	8.52081	8.75141	8.21072	8.39723	8.01247	8.64028	8.31161	8.62941	8.54884	8.66129	coding	NM_178539	FAM19A2	RefSeq_coding	4069	chr12	-	62102042	62586551		TAATAAGAACAAGATAGAAGAACGGTCACAAACAGTCAAGTGCTCCTGCTTCCCTGGGCA	338811	Hs.269745	GO:0005737	NP_848634	Family with sequence similarity 19 (chemokine (C-C motif)-like), member A2
ASHG19A3A012139	553.926	362.125	504.374	446.168	202.628	264.861	186.437	229.646	634.391	365.672	321.341	944.349	8.98429	8.53195	9.10128	9.26138	7.65652	7.83706	7.61719	8.64363	8.71151	8.38693	8.15771	9.66157	coding	NM_020415	RETN	RefSeq_coding	479	chr19	+	7733971	7735340		TCTAGCAAGACCCTGTGCTCCATGGAAGAAGCCATCAATGAGAGGATCCAGGAGGTCGCC	56729	Hs.283091	GO:0005179|GO:0008150|GO:0045444|GO:0032868|GO:0005576|GO:0005615|GO:0005634	NP_065148	Resistin
ASHG19A3A043229	5103.15	2006.12	6768.83	2504.63	5344.41	2847.74	3744.44	2365.61	8326.19	3174.26	10075.7	4729.27	12.2559	11.037	12.8738	11.5523	12.5404	11.2822	12.1017	11.6882	12.7416	11.5244	13.1963	11.975	coding	NM_001174084	POLL	RefSeq_coding	2804	chr10	-	103338638	103348027		CAGGGCGTTCCCACTCACCCCCGAAAGTCCTCCTCCTTCCTCTGCGAGTCTGTGTTGGAG	27343	Hs.523230	GO:0003677|GO:0003887|GO:0016829|GO:0046872|GO:0016779|GO:0016740|GO:0006260|GO:0006289|GO:0016446|GO:0005622|GO:0005634	NP_037406	Polymerase (DNA directed), lambda
ASHG19A3A033731	60.873	79.202	87.6548	59.0771	94.3397	98.585	49.0838	21.6365	105.012	57.4386	119.838	155.976	5.81382	6.17553	6.7022	6.25829	6.58787	6.39602	5.70542	5.20007	6.20775	5.69231	6.85547	6.88564	coding	NM_001164458	ACTR3C	RefSeq_coding	1298	chr7	-	149944301	150020758		CTGGCCAAGCTGGGAAGTCCGGCGCAACTCCGCACCGCAGAGCCGGCGCCTCCTCGGCAG	653857	Hs.664579	GO:0005524|GO:0003779|GO:0000166|GO:0030833|GO:0005856	NP_001157931	ARP3 actin-related protein 3 homolog C (yeast)
ASHG19A3A049086	77.9081	183.466	96.852	181.9	114.053	129.472	76.9097	99.729	138.314	101.566	136.679	374.312	6.17473	7.48196	6.84323	7.98109	6.85592	6.78491	6.34456	7.45263	6.57253	6.53424	7.0277	8.22799	coding	NM_001109903	RNFT2	RefSeq_coding	2914	chr12	+	117176095	117291434		AAAGGGAAGCAACAGGAACTTCTGCAACTGGTTTTTATCGGAAAGATCATCCTGCCTGCA	84900	Hs.437195	GO:0046872|GO:0008270|GO:0016021|GO:0016020	NP_116203	Ring finger protein, transmembrane 2
ASHG19A3A038791	155.342	821.595	110.508	130.976	258.136	404.781	265.214	138.2	376.495	312.315	100.86	354.83	7.16916	9.76308	7.02541	7.49089	8.00796	8.45426	8.1252	7.92509	7.95699	8.16558	6.63242	8.14666	coding	NM_012383	OSTF1	RefSeq_coding	1313	chr9	+	77703397	77762113		TTTGGACAACAGAGTGGGTGTTAATGGCTTAGACAAAGCTGGAAGCACTGCCTTATACTG	26578	Hs.494192	GO:0017124|GO:0042802|GO:0005515|GO:0001503|GO:0007165|GO:0005737|GO:0005622	NP_036515	Osteoclast stimulating factor 1
ASHG19A3A005796	663.781	327.519	564.246	399.941	517.901	476.209	498.65	496.501	1363.85	694.807	889.988	792.274	9.24181	8.37438	9.24892	9.11313	9.02077	8.69933	9.05224	9.70235	9.83452	9.34525	9.54492	9.38005	coding	NM_133274	FCAR	RefSeq_coding	1561	chr19	+	55385548	55401839	NM_133273,NM_133272,	AAACAGACCACCCTCCTGTGTCTTGGGGACTTTCCCATGCCTTTCATATCTGCCAAATCG	2204	Hs.659872	GO:0019862|GO:0004872|GO:0006955|GO:0005576|GO:0005887|GO:0005886	NP_579813	Fc fragment of IgA, receptor for
ASHG19A3A018761	78.8443	98.1804	68.561	88.4249	70.59	82.8499	54.8838	77.3569	126.148	111.154	93.7362	138.682	6.19472	6.51171	6.36809	6.89316	6.17447	6.14221	5.86367	7.07207	6.4559	6.66329	6.5346	6.71235	coding	NM_181614	KRTAP19-7	RefSeq_coding	192	chr21	-	31933417	31933608		CAGATACAGCTGCTGCCACCCATCATGCTATGGGGGATACTGGTCTTCTGGATTCTATTG	337974	Hs.553696	GO:0005882	NP_853645	Keratin associated protein 19-7
ASHG19A3A027388	221.509	608.017	175.625	435.725	212.695	476.479	340.787	181.603	314.126	571.662	221.541	485.726	7.66595	9.31445	7.64832	9.23038	7.72842	8.70168	8.49329	8.32099	7.70512	9.04956	7.65931	8.6305	coding	NM_015146	41160	RefSeq_coding	4344	chr5	-	132091696	132113067	NM_001098813,	CTATGCAAACACGTAAAAGCCATGAATGCTGGAATCCAAAACTGACGAGGTTTATTTTTT	23176	Hs.522057	GO:0005525|GO:0000166|GO:0005515|GO:0007049|GO:0005737|GO:0005856|GO:0031105	NP_055961	Septin 8
ASHG19A3A040983	108.467	102.687	93.4789	139.061	88.9187	117.531	98.3075	110.487	192.006	129.682	139.801	260.795	6.65084	6.58104	6.79411	7.58127	6.49955	6.64461	6.69876	7.60382	7.02396	6.88564	7.05408	7.68351	coding	NM_001098407	GAGE2D	RefSeq_coding	561	chrX	+	49226137	49233479	NM_001475,NM_001474,NM_001472,NM_001468,NM_001127345,NM_001127212,NM_001127200,NM_001127199,NM_001098412,NM_001098411,NM_001098406,NM_001040663,	GAGGCAGTGCTGTGTGGTTCCTGCCGTCCGGACTCTTTTTCCTCTACTGAGATTCATCTG	100101629	Hs.668804	GO:0005515|GO:0006968	NP_036328	G antigen 8
ASHG19A3A019281	15033.8	12484.1	13698.6	21178.7	13568.1	19183.5	10302.1	22647.7	13211.1	13211.3	12160.7	18706.2	13.9047	13.4549	14.0161	14.4669	13.966	14.0031	13.6393	14.4245	13.5114	13.5779	13.4954	13.8563	coding	NM_178865	SERINC2	RefSeq_coding	2011	chr1	+	31885962	31907524		GACTTCGTGCCTTACTGAGTCTCTAAGACTTTTTCTAATAAACAAGCCAGTGCGTGTACC	347735	Hs.270655	GO:0016021|GO:0016020	NP_849196	Serine incorporator 2
ASHG19A3A025646	108.739	102.661	129.362	115.588	136.032	149.524	134.85	107.129	179.179	116.461	147.471	258.865	6.65508	6.58048	7.24328	7.30006	7.09644	6.99685	7.15376	7.56292	6.93028	6.7257	7.12874	7.67167	coding	NM_152291	MUC7	RefSeq_coding	2467	chr4	+	71337833	71348713		CTCGACTGGAGTGTTATAAAACCTGAAAATTCTCTTGTGCTTTCTCTTCTTTTGCTTCTA	4589	Hs.631946	GO:0005515|GO:0005576	NP_689504	Mucin 7, secreted
ASHG19A3A034994	308.378	186.92	418.759	189.685	421.491	189.677	372.671	359.933	1616.58	331.689	762.346	463.052	8.14579	7.51072	8.84471	8.04493	8.718	7.34065	8.62894	9.2661	10.1215	8.25181	9.34046	8.55973	coding	NM_003117	SPAM1	RefSeq_coding	2438	chr7	+	123565285	123611459		GGAGAAGGCAAGTTACAAAGATAGACCTTCCCTCAAGATAATCAGATTTTCATGGTATTA	6677	Hs.121494	GO:0004415|GO:0016798|GO:0007339|GO:0005975|GO:0007155|GO:0007342|GO:0031225|GO:0005886	NP_694859	Sperm adhesion molecule 1 (PH-20 hyaluronidase, zona pellucida binding)
ASHG19A3A054696	1993.47	26357.9	1572.86	14545	1871.7	15784.3	1537.76	23957.6	1830.73	15959.5	1765.61	14967.2	10.8372	14.3311	10.7002	13.9733	10.9346	13.7498	10.7202	14.4884	10.3216	13.839	10.5317	13.582	coding	NM_003946	NOL3	RefSeq_coding	1402	chr16	+	67207869	67209624		GATTCTGACCAGTGACTTACACAAAAGGCGCTCTATACATATTATAATATATTCGCTTAC	8996	Hs.513667	GO:0003723|GO:0042802|GO:0005515|GO:0008380|GO:0006916|GO:0006397|GO:0042981|GO:0005737|GO:0005829|GO:0005622|GO:0005730|GO:0005634	NP_003937	Nucleolar protein 3 (apoptosis repressor with CARD domain)
ASHG19A3A005069	113.094	148.714	97.2779	95.3903	117.293	103.806	120.263	78.7197	179.504	118.331	119.621	115.473	6.71289	7.15247	6.85001	7.00938	6.89316	6.47281	6.99162	7.09793	6.93284	6.74984	6.85293	6.43272	coding	NM_018909	PCDHA6	RefSeq_coding	5287	chr5	+	140207649	140391929		TTTAAATGAAGATCATGATGCCAAACCACGACAGCCCAACCCTGACTGGCGTTACTCTGC	56117	Hs.199343			Protocadherin alpha cluster, complex locus
CUST_19_PI418767722	220.028	490.2	162.493	92.9459	349.068	828.634	264.516	40.299	391.633	148.403	229.743	344.395	7.65652	8.97767	7.55115	6.97229	8.44441	9.51932	8.12262	6.10644	8.00975	7.07708	7.70994	8.10007	coding	NM_000291	PGK1	RefSeq_coding	2439	chrX	+	77359665	77382322		ATATTGCTGAATGCAAGAAGTGGGGCAGCAGCAGTGGAGAGATGGGACAATTAGATAAAT	5230	Hs.78771	GO:0005524|GO:0000166|GO:0004618|GO:0004618|GO:0016740|GO:0005975|GO:0006094|GO:0006006|GO:0006096|GO:0016310|GO:0005737|GO:0005829	NP_000282	Phosphoglycerate kinase 1
ASHG19A3A013372	655.724	674.827	859.9	704.635	876.086	783.521	820.934	628.126	1587.94	828.306	1131.83	1216.16	9.22659	9.47388	9.84973	9.86459	9.78602	9.43546	9.76836	10.017	10.0942	9.61846	9.87392	10.0589	coding	NM_004881	TP53I3	RefSeq_coding	1675	chr2	-	24300304	24307728		ATTTGCCTGATCCTCTTCGGCGTTGTCCTGCTCTGCCGCATCCAGCCCTGTACCGCCATC	9540	Hs.50649	GO:0070402|GO:0003960|GO:0005488|GO:0016491|GO:0042803|GO:0048038|GO:0008270|GO:0006739|GO:0008631|GO:0055114|GO:0005575	NP_671713	Tumor protein p53 inducible protein 3
ASHG19A3A028271	73.6586	64.6626	72.166	74.5119	69.3439	75.1886	60.2057	50.1652	89.7655	64.7972	66.207	97.2775	6.09182	5.86515	6.43335	6.61999	6.14517	5.99638	5.9919	6.4281	6.0013	5.87023	6.07571	6.16192	coding	NM_020928	ZSWIM6	RefSeq_coding	5519	chr5	+	60628099	60841998		AAATCATGGCAGTGAATTACCCAACTTAACCAATGCTCTGCCTCAGGGTGCAAATGCCAA	57688	Hs.650537	GO:0046872|GO:0008270	NP_065979	Zinc finger, SWIM-type containing 6
ASHG19A3A043403	970.058	3397.53	1279.16	4271.66	1148.59	3409.01	1207.75	1551.71	897.308	3106.42	1615.63	1438.18	9.78673	11.745	10.4049	12.243	10.178	11.541	10.3455	11.1592	9.22034	11.4933	10.4026	10.3043	coding	NM_014661	FAM53B	RefSeq_coding	5740	chr10	-	126307862	126432930		TCTCTCAGGAATTTGCTTGTTACTTGTACTGTGTAAATAAAGCTTCCTGGTTCAATACCC	9679	Hs.129195	GO:0003674|GO:0008150|GO:0005575	NP_055476	Family with sequence similarity 53, member B
ASHG19A3A034797	18495	35990.1	20487.1	37597.9	19083	28906.7	19176.9	30181.1	25138.7	29604.9	20724.4	30363.9	14.2538	14.6666	14.6552	15.2226	14.4884	14.5898	14.5636	14.7767	14.5861	14.6264	14.4625	14.5599	coding	NM_001008395	C7orf59	RefSeq_coding	613	chr7	+	99746529	99751833		GGAGACCTCCCTTTGTGCTCCCTCACTCCCTAATAAACATGAGTCTGATGTTCTCCAGCC	389541	Hs.406520		NP_001008396	Chromosome 7 open reading frame 59
ASHG19A3A052138	315.635	123.762	423.24	158.823	598.608	247.362	330.215	222.105	895.988	196.688	534.239	228.565	8.18156	6.86489	8.85945	7.78042	9.23058	7.74114	8.44029	8.60193	9.21742	7.49052	8.83944	7.47656	coding	NM_207381	TNFAIP8L3	RefSeq_coding	2292	chr15	-	51348800	51397473		CCACGTTACAAACAAGACTCATCCCCTTATCTTTTCATCTTCAGAGGGGAAAGGGACTTG	388121	Hs.306343		NP_997264	Tumor necrosis factor, alpha-induced protein 8-like 3
ASHG19A3A012095	1148.54	356.021	5594.36	1080.27	4796.91	1419.46	3852.01	1880.77	1733.67	506.2	5626.09	1643.15	10.0345	8.50372	12.5906	10.4416	12.3717	10.281	12.1537	11.4103	10.2352	8.87792	12.2953	10.5063	coding	NM_152784	TMEM146	RefSeq_coding	2528	chr19	+	5720687	5778741		ATGTTCAAGTACTCAGATCACCCCCTCAACCGGAGTTTCGGGCTGTCTTTTGACTATAAT	257062	Hs.631842	GO:0016021|GO:0016020	NP_689997	Transmembrane protein 146
ASHG19A3A004685	82.849	53.2312	72.1532	43.0967	87.0629	75.1135	69.4032	39.4305	124.409	89.7781	88.0689	84.571	6.26395	5.56959	6.43316	5.75983	6.46966	5.99469	6.20254	6.07825	6.43812	6.34609	6.45129	5.94222	coding	NM_013942	PAX3	RefSeq_coding	1080	chr2	-	223158348	223163700		ATCGACGGCATCCTGAGCGAGCGAGGAAAGGCCCTGGTCTCCGGAGTTTCCTCGCATTAA	5077	Hs.42146	GO:0005515|GO:0043565|GO:0003700|GO:0016563|GO:0006915|GO:0007275|GO:0009887|GO:0010552|GO:0006355|GO:0007605|GO:0006366|GO:0005634	NP_852126	Paired box 3
ASHG19A3H0000573	108.215	222.206	79.5229	106.809	113.936	110.814	102.317	124.492	100.915	204.063	75.1326	105.321	6.64615	7.78869	6.57253	7.18039	6.85312	6.56308	6.75885	7.7711	6.15702	7.54372	6.24076	6.2882	coding	NM_014620_Exon4-	NM_014620	HOX cluster	1180	chr12	-	54448633	54449813		ACTAATTCACATCCACTGGTTTATTATTGATCACGGGGCATTTCACATCGACACTAAAAT
ASHG19A3A031044	131.602	163.332	137.591	123.943	177.268	190.309	129.421	101.706	371.567	235.913	202.864	267.953	6.93223	7.30076	7.33182	7.4067	7.46401	7.34372	7.09828	7.4822	7.93696	7.76123	7.54234	7.7242	coding	NM_001949	E2F3	RefSeq_coding	5050	chr6	+	20402136	20493945		AACTGATCCAAAGCTGCACCCTGGACCTCAAACTGTTAACCGAGGATTCAGAGAATCAAA	1871	Hs.269408	GO:0003677|GO:0005515|GO:0003700|GO:0016563|GO:0000080|GO:0000085|GO:0000278|GO:0008284|GO:0045893|GO:0006367|GO:0005654|GO:0005654|GO:0005634|GO:0005667	NP_001940	E2F transcription factor 3
ASHG19A3A008113	9569.18	10843.5	9141.7	7549.18	8655.5	10509.2	8398.01	8974.23	12045	12732.9	10630.3	8732.1	13.1786	13.2771	13.3524	13.0069	13.29	13.1812	13.3359	13.3255	13.3485	13.5251	13.2868	12.8383	coding	NM_006923	SDF2	RefSeq_coding	1075	chr17	-	26975607	26988933		TTGGCATCATGGACTGTTAATGTATGTGATTTTCCCCCTATTTTCTCTCTCCAAAATGAT	6388	Hs.514036	GO:0004169|GO:0006486|GO:0005576|GO:0005615|GO:0016020	NP_008854	Stromal cell-derived factor 2
ASHG19A3A038569	225.38	88.0163	312.485	116.746	269.334	149.981	183.828	67.0508	552.964	173.952	394.088	193.983	7.69254	6.34575	8.44015	7.31514	8.06615	7.0013	7.60113	6.85971	8.51933	7.30903	8.43638	7.22573	coding	NM_014858	TMCC2	RefSeq_coding	4021	chr1	+	205197037	205242470		TTAATAATTTAGACCCCAGGCCTCATATGAATATAAGAGGGGGTGCGGTCTTCCCCAAGA	9911	Hs.6360	GO:0016021|GO:0016020	NP_055673	Transmembrane and coiled-coil domain family 2
ASHG19A3A054840	796.326	487.678	893.472	512.468	768.701	644.741	704.38	579.31	1548.84	652.151	1226.31	824.062	9.50683	8.97053	9.90761	9.45142	9.5913	9.14882	9.54891	9.90653	10.0492	9.24402	9.98423	9.44041	coding	NM_182981	OSGIN1	RefSeq_coding	1958	chr16	+	83986826	83999938		TCCCGATCTCGCGGGGGACTCTGTGATCCGTGTTCCCCTGACCCTCCTAGTGCACAACTT	29948	Hs.128055	GO:0008083|GO:0030154|GO:0007275|GO:0030308|GO:0040008|GO:0005575	NP_892026	Oxidative stress induced growth inhibitor 1
ASHG19A3A047556	605.416	2208.25	489	671.278	721.45	961.93	673.043	237.798	966.398	872.899	557.069	862.621	9.11636	11.16	9.05746	9.79677	9.4987	9.73257	9.47984	8.69453	9.32431	9.70087	8.89798	9.5186	coding	NM_018113	LMBR1L	RefSeq_coding	2358	chr12	-	49490924	49504680		ATTGCATAATCTGAGCCAGAGTTTGGGACCAGGACCTCCTGCTTTTCCATACTTAACTGT	55716	Hs.272838	GO:0004872|GO:0006897|GO:0016021|GO:0005886	NP_060583	Limb region 1 homolog (mouse)-like
ASHG19A3A052285	477.185	282.344	454.348	289.13	584.08	519.447	542.761	546.096	518.646	614.953	1460.61	3334.28	8.76228	8.15385	8.96045	8.65534	9.19063	8.82498	9.16192	9.83201	8.43021	9.16298	10.2513	11.4888	coding	NM_005621	S100A12	RefSeq_coding	466	chr1	-	153346183	153348075		TGAAGGCTTTTTACCCAGCAATGTCCTCAATGAGGGTCTTTTCTTTCCCTCACCAAAACC	6283	Hs.19413	GO:0050786|GO:0050786|GO:0005509|GO:0005515|GO:0008270|GO:0042742|GO:0050832|GO:0006954|GO:0045087|GO:0031640|GO:0043123|GO:0006805|GO:0005737|GO:0005829|GO:0005576|GO:0005626|GO:0005634	NP_005612	S100 calcium binding protein A12
ASHG19A3A012784	667.809	571.958	682.164	606.03	690.763	614.559	512.497	461.311	1142.71	660.124	842.844	740.525	9.25082	9.21646	9.51308	9.66538	9.43815	9.07336	9.08803	9.59408	9.57524	9.26469	9.47328	9.27869	coding	NM_012116	CBLC	RefSeq_coding	1591	chr19	+	45281125	45303902		ATCCTGCAGACCATCCCTGCCAACAAACCCCTGTCCCAGGTGCTCCTGGAGGGACAGAAG	23624	Hs.466907	GO:0017124|GO:0005509|GO:0005154|GO:0001784|GO:0004871|GO:0004842|GO:0008270|GO:0007166|GO:0043407|GO:0007175|GO:0042059|GO:0042787|GO:0005634	NP_036248	Cas-Br-M (murine) ecotropic retroviral transforming sequence c
ASHG19A3A010786	696.637	303.176	595.744	341.28	420.95	444.132	376.128	247.342	654.28	342.634	655.653	441.695	9.31496	8.25625	9.32287	8.89287	8.71549	8.59051	8.64306	8.7483	8.75592	8.2981	9.11606	8.48867	coding	NM_177543	PPAP2C	RefSeq_coding	1394	chr19	-	281045	291169		AGGAAGTCTGTGCGGAGGGGCCGCGCGCGCGCCTCCATCCCGCCCCGCCTGGCCTGGGAG	8612	Hs.465506	GO:0016787|GO:0008195|GO:0004721|GO:0042392|GO:0006665|GO:0016021|GO:0016020|GO:0005886	NP_808211	Phosphatidic acid phosphatase type 2C
ASHG19A3A042769	4675.8	22548.1	4391.16	8309.42	2670.77	11944.5	3554.4	6288.6	3498.8	9559.16	3669.82	12210	12.1297	14.1274	12.2319	13.1425	11.4627	13.3657	12.0107	12.9362	11.3836	13.1045	11.669	13.311	coding	NM_023009	MARCKSL1	RefSeq_coding	1584	chr1	-	32799440	32801834		AAACCATTCTCTTCCACCTGGTTTTACTGTAACATTTGGAAAAGGAATAAATGTCGTCCC	65108	Hs.75061	GO:0005516|GO:0008284|GO:0016192|GO:0005886	NP_075385	MARCKS-like 1
ASHG19A3A021293	154.42	305.772	73.1254	30.4617	235.768	321.606	175.627	31.1331	167.569	186.673	80.0864	191.254	7.16203	8.26778	6.4508	5.20924	7.87636	8.12112	7.54062	5.72862	6.83463	7.41245	6.32213	7.20337	coding	NM_000158	GBE1	RefSeq_coding	3118	chr3	-	81538849	81810950		TGGAGCATGCTTACTATGCCAGCTTTGGTTACCAAATCACAAGCTTCTTTGCAGCTTCCA	2632	Hs.436062	GO:0003844|GO:0043169|GO:0004553|GO:0016757|GO:0005975|GO:0006091|GO:0006006|GO:0005978|GO:0005977|GO:0005829	NP_000149	Glucan (1,4-alpha-), branching enzyme 1
ASHG19A3A031717	1031.17	395.829	1344.93	543.72	1256.32	564.382	716.398	528.715	2071.46	646.621	2029.4	773.145	9.87791	8.66887	10.4708	9.53069	10.3139	8.94493	9.57895	9.79342	10.519	9.2294	10.7477	9.33813	coding	NM_001160130	KCNQ5	RefSeq_coding	6568	chr6	+	73331570	73908571		AGTGTGATGTATCAGTGGAAGACCTCACCCCACCACTTAAAACTGTCATTCGAGCTATCA	56479	Hs.445324	GO:0005242|GO:0005244|GO:0006811|GO:0006813|GO:0006461|GO:0007268|GO:0055085|GO:0016021|GO:0005886|GO:0008076	NP_062816	Potassium voltage-gated channel, KQT-like subfamily, member 5
ASHG19A3A000970	548.75	428.684	521.795	300.467	655.831	456.197	438.77	261.006	804.858	403.249	792.591	712.31	8.96856	8.77843	9.14338	8.71319	9.36534	8.6307	8.86529	8.82095	9.06442	8.5305	9.3947	9.22034	coding	NM_001012751	ABI1	RefSeq_coding	3557	chr10	-	27035526	27150016	NM_001012750,	CCTTCGCCACCCACTATTGGACCAGCAGCCCCGGGCTCAGCTCCTGGTTCCCAGTATGGC	10006	Hs.508148	GO:0008092|GO:0005515|GO:0030296|GO:0008154|GO:0006928|GO:0008285|GO:0018108|GO:0001756|GO:0007169|GO:0030054|GO:0005737|GO:0005856|GO:0005829|GO:0005783|GO:0030175|GO:0030426|GO:0005622|GO:0030027|GO:0005634|GO:0005625|GO:0045202|GO:0019717	NP_005461	Abl-interactor 1
ASHG19A3A054353	2047.79	567.703	1970.79	343.899	2824.86	853.543	1739.24	286.079	5576.31	597.101	1424.42	876.972	10.8762	9.20537	11.038	8.90407	11.5509	9.5622	10.9067	8.95026	12.1264	9.11567	10.2062	9.54217	coding	NM_005622	ACSM3	RefSeq_coding	2158	chr16	+	20775311	20808478		ATTTGAGGTAGAAAATGCCCTGAATGAACACCCTTCAGTTGCAGAGTCAGCTGTTGTCAG	6296	Hs.706754	GO:0005524|GO:0047760|GO:0016874|GO:0046872|GO:0003674|GO:0000166|GO:0006631|GO:0006629|GO:0008217|GO:0005575|GO:0005759|GO:0005739	NP_973729	Acyl-CoA synthetase medium-chain family member 3
ASHG19A3A031408	168.113	159.908	181.772	157.365	156.67	167.426	184.001	177.664	515.424	264.543	313.1	312.113	7.28186	7.26615	7.69486	7.76426	7.28995	7.16414	7.60244	8.28906	8.41904	7.93186	8.12568	7.95271	coding	NM_014357	LCE2B	RefSeq_coding	619	chr1	+	152658598	152659874		TGCAGGTTTTGTTTTCCTCCTTTACCTCATGTTATAATAAAGCTCTGATTTCTGACTCAC	26239	Hs.234766	GO:0003674|GO:0008544|GO:0031424|GO:0005575	NP_055172	Late cornified envelope 2B
ASHG19A3A006495	219.761	258.606	143.83	102.426	155.076	329.94	193.257	235.869	368.562	287.281	276.637	363.87	7.65467	8.01755	7.38934	7.11802	7.27686	8.15366	7.6735	8.67985	7.92497	8.04687	7.95852	8.1814	coding	NM_178273	PILRA	RefSeq_coding	1070	chr7	+	99971067	99997722		TCGAGGGGACCAAACTCTCCATCACCCAGGGGAACCCTTCCAAAACACAGAGGAGCCATA	29992	Hs.444407	GO:0005515|GO:0004872|GO:0044419|GO:0007165|GO:0005576|GO:0016021|GO:0005886	NP_840057	Paired immunoglobin-like type 2 receptor alpha
ASHG19A3A050648	838.925	1502.34	725.047	683.952	862.138	1656.75	712.256	600.577	903.11	1497.29	754.852	585.591	9.58167	10.6097	9.59852	9.82164	9.76743	10.4987	9.5685	9.9591	9.23198	10.4665	9.32983	8.91188	coding	NM_138476	MDP1	RefSeq_coding	731	chr14	-	24683159	24685241		TCTCCCAGATGATCTTCTTTGATGATGAGAGGCGGAATATTGTAGACGTCAGCAAACTGG	145553	Hs.220963	GO:0016787|GO:0046872|GO:0004725	NP_612485	Magnesium-dependent phosphatase 1
ASHG19A3A021669	921.62	1489.05	834.761	612.108	694.052	809.769	1491.83	2881.97	1016.76	3213.59	1609.44	408.646	9.71755	10.5981	9.80001	9.67613	9.4446	9.48452	10.6644	11.9391	9.39409	11.541	10.3966	8.37156	coding	NM_002899	RBP1	RefSeq_coding	916	chr3	-	139236275	139258671		TCACTTTTCCTTTTCTTAAAACAAAGCCATGCCAATAAAGTGATCTGTGTTCAAAACGTC	5947	Hs.529571	GO:0008289|GO:0016918|GO:0005501|GO:0019841|GO:0005215|GO:0030852|GO:0033189|GO:0042573|GO:0042572|GO:0006776|GO:0005737	NP_002890	Retinol binding protein 1, cellular
ASHG19A3A003830	263.111	184.636	246.08	149.379	208.542	169.813	216.9	95.2266	340.949	113.471	212.981	254.656	7.9105	7.49145	8.1093	7.68911	7.69592	7.18575	7.83661	7.3841	7.82016	6.68812	7.60914	7.64551	coding	NM_001178086	ZFX	RefSeq_coding	6801	chrX	+	24167761	24234372		CGCCGGCCGCCCGCACGTCCGTCCGTGGATGATGCTGGCAAAATAGAACACGATGGTTCT	7543	Hs.336681	GO:0003677|GO:0046872|GO:0003713|GO:0030528|GO:0008270|GO:0005622|GO:0005730|GO:0005634	NP_003401	Zinc finger protein, X-linked
ASHG19A3A006628	137.767	621.578	92.7358	68.3553	293.592	189.258	255.784	145.5	222.711	246.885	203.269	492.998	6.99561	9.34464	6.78208	6.48297	8.19317	7.33764	8.07582	8.00522	7.23473	7.82696	7.54545	8.65299	coding	NM_182720	CREM	RefSeq_coding	1955	chr10	+	35484054	35501885	NM_182718,	ATGGCTGTAACTGGAGATGACACAGCTGCCACTGGTGACATGCCAACTTACCAGATCCGA	1390	Hs.200250	GO:0003677|GO:0008140|GO:0005515|GO:0046983|GO:0043565|GO:0003700|GO:0030154|GO:0007275|GO:0006355|GO:0006355|GO:0007165|GO:0007283|GO:0005634	NP_898883	CAMP responsive element modulator
ASHG19A3A000644	511.943	1808.28	508.026	386.221	481.863	1184.78	619.271	834.697	893.558	926.776	577.581	897.541	8.86963	10.883	9.11059	9.06462	8.919	10.0243	9.35289	10.3841	9.21535	9.78643	8.94801	9.57838	coding	NM_000995	RPL34	RefSeq_coding	918	chr4	+	109541721	109551637		TTTTTTCTTCCTCTTCCGGGGACGTTGTCTGCAGGCACTCAGAATGGTCCAGCGTTTGAC	6164	Hs.438227	GO:0003723|GO:0005515|GO:0003735|GO:0044267|GO:0031018|GO:0010467|GO:0006412|GO:0006414|GO:0006415|GO:0019058|GO:0016032|GO:0019083|GO:0005829|GO:0005829|GO:0022625|GO:0005622|GO:0005840	NP_296374	Ribosomal protein L34
ASHG19A3A051010	107.999	149.075	118.888	120.439	127.02	132.847	125.947	109.74	122.138	164.412	107.188	195.767	6.64205	7.15792	7.12742	7.3605	7.00586	6.82403	7.05976	7.59486	6.41285	7.22446	6.71125	7.24162	coding	NM_138791	C14orf148	RefSeq_coding	753	chr14	-	77872997	77889232		GCTCAACATATTTCTGGCATTCTTTTGAAAATTACTTTCCTGTTGGCCCATTGCTATCTT	122945	Hs.97556	GO:0005488|GO:0016491|GO:0004735|GO:0055114|GO:0006561	NP_001106946	Chromosome 14 open reading frame 148
ASHG19A3A004477	153.066	261.696	173.599	240.348	174.982	250.228	152.834	139.33	279.615	247.734	210.342	411.042	7.14984	8.0364	7.63315	8.39035	7.44811	7.75573	7.33129	7.93777	7.54138	7.83277	7.59268	8.37878	coding	NM_006230	POLD2	RefSeq_coding	1616	chr7	-	44154286	44163147		TTGGCGGGATGCGGCGCGCCGCGCGTGAACCTCCTTGGCCTGGGCGAAGCTGTGTGGACC	5425	Hs.306791	GO:0003677|GO:0003887|GO:0016779|GO:0005515|GO:0016740|GO:0006281|GO:0006260|GO:0006271|GO:0000084|GO:0006284|GO:0000278|GO:0006289|GO:0006297|GO:0000723|GO:0000722|GO:0032201|GO:0006283|GO:0005654|GO:0005654|GO:0005634	NP_006221	Polymerase (DNA directed), delta 2, regulatory subunit 50kDa
ASHG19A3A033334	10246.2	45625.1	10168	34061.4	9120.92	24833.1	14096.6	30056.7	11443.6	44058.5	14857.4	27377.8	13.2813	14.9462	13.5271	15.0987	13.3787	14.3492	14.1087	14.7727	13.2668	15.1323	13.845	14.4232	coding	NM_003768	PEA15	RefSeq_coding	2474	chr1	+	160175124	160185160		TTCTGTCTGCAGTGTGCACGGCCTTGTTCTAACCCGGAATAAAGGTGATTGATTGTATTG	8682	Hs.517216	GO:0005515|GO:0006916|GO:0008643|GO:0046325|GO:0042981|GO:0043278|GO:0006810|GO:0005737|GO:0005875	NP_003759	Phosphoprotein enriched in astrocytes 15
ASHG19A3A038753	251.376	146.422	239.126	193.387	344.632	235.456	190.228	198.967	539.991	248.5	300.805	274.387	7.84305	7.12409	8.07137	8.07399	8.4266	7.66011	7.64797	8.44734	8.48391	7.83848	8.07137	7.75815	coding	NM_001170416	TJP2	RefSeq_coding	4500	chr9	+	71820077	71870124		CCCCTTGTTTTCCCCAACCTTTCTTCATGGGAAGGGGAGGGAAGCAAAACCATTCTCACA	9414	Hs.50382	GO:0004385|GO:0005515|GO:0006915|GO:0006921|GO:0005912|GO:0030054|GO:0005737|GO:0005634|GO:0005886|GO:0005886|GO:0005923	NP_963923	Tight junction protein 2 (zona occludens 2)
ASHG19A3A007854	70.5054	67.4053	47.4067	53.0531	88.7722	107.487	47.3332	46.1738	85.6085	80.8735	49.4301	111.236	6.02523	5.93128	5.8793	6.0922	6.49735	6.51978	5.64923	6.30204	5.93242	6.19511	5.68884	6.37256	coding	NM_004860	FXR2	RefSeq_coding	3016	chr17	-	7494547	7518215		AAGAAAGCCCTGGGAGCCAACTGCATCTTTCTCAACATCACAAACAGTGAGCTCTTCATT	9513	Hs.52788	GO:0003723|GO:0005515|GO:0005737|GO:0022625	NP_004851	Fragile X mental retardation, autosomal homolog 2
ASHG19A3A022227	66.4623	49.4862	47.2736	51.8768	92.1912	72.7634	57.4834	42.9206	84.876	78.7495	61.2677	96.5354	5.9395	5.45544	5.87586	6.05755	6.55288	5.94498	5.92911	6.1953	5.92171	6.15672	5.97536	6.14952	coding	NM_001080517	SETD5	RefSeq_coding	6827	chr3	+	9439402	9519836		ATTAATTGGACCCCGTGATTTCCAATCTCTGCTGTGTTGGACGTCATGAGCATTGCAATC	55209	Hs.288164		NP_001073986	SET domain containing 5
ASHG19A3A010355	132.462	98.0684	87.8298	90.3582	115.937	139.251	99.0986	64.2308	128.56	83.922	87.8954	126.066	6.94196	6.51	6.70417	6.92865	6.87666	6.89229	6.71162	6.79666	6.48284	6.24808	6.44793	6.56451	coding	NM_176787	PIGN	RefSeq_coding	4893	chr18	-	59711459	59854289		CAAATTACACACTGGCTTGGAAAGTACTCCCATGTTCCGTTTGATCTTGGCAATTTAATG	23556	Hs.157031	GO:0016780|GO:0016740|GO:0006501|GO:0044267|GO:0043687|GO:0016254|GO:0005783|GO:0005789|GO:0016021|GO:0016020	NP_789744	Phosphatidylinositol glycan anchor biosynthesis, class N
ASHG19A3A049919	61.454	38.6487	87.697	60.8633	80.1696	62.487	75.1223	51.8045	176.233	55.015	82.2859	118.174	5.82547	5.08788	6.70286	6.30317	6.35684	5.71401	6.31298	6.47783	6.90913	5.62777	6.36278	6.46739	coding	NM_001010922	BCL2L15	RefSeq_coding	4986	chr1	-	114419436	114430169		AAACGGAATGCATTGTGAACACTCTACTCATGGACTTCTTGAGCCCAACATTGCAGGTTG	440603	Hs.123106	GO:0006915|GO:0005829|GO:0005634	NP_001010922	BCL2-like 15
ASHG19A3A047740	94.4763	113.309	54.3175	43.9699	113.059	113.669	73.3578	20.8696	80.1172	67.6863	82.3844	93.8735	6.45337	6.7297	6.05952	5.79162	6.83926	6.59896	6.2798	5.14435	5.84359	5.93742	6.36468	6.10558	coding	NM_005730	CTDSP2	RefSeq_coding	5038	chr12	-	58213711	58240747		TCAAGGAAGGATCTGTGTGGTCATTGACCTCGATGAAACCCTTGTGCATAGCTCCTTTAA	10106	Hs.524530	GO:0008420|GO:0016787|GO:0046872|GO:0004721|GO:0006470|GO:0005634|GO:0005625	NP_005721	CTD (carboxy-terminal domain, RNA polymerase II, polypeptide A) small phosphatase 2
ASHG19A3A006173	367.767	370.071	202.397	133.521	201.942	566.709	151.462	35.333	155.221	397.095	240.735	431.771	8.39762	8.56382	7.84459	7.51748	7.65236	8.95145	7.31981	5.91694	6.73057	8.50755	7.77975	8.44938	coding	NM_152832	FAM89B	RefSeq_coding	1428	chr11	+	65339819	65341669		GCTGGCCGCGCTGCGCAAGGAGATGCTGTGGGGCCTGTACGAGTCAATCCAGGACTACAA	23625	Hs.25723		NP_690045	Family with sequence similarity 89, member B
ASHG19A3A048543	134.552	353.733	128.506	119.619	188.556	240.397	106.304	177.132	113.071	245.044	121.471	154.264	6.96295	8.49376	7.23442	7.35013	7.55104	7.69388	6.81454	8.28378	6.30761	7.81663	6.87354	6.8681	coding	NM_001013635	C12orf68	RefSeq_coding	2380	chr12	+	48577365	48579709		TGTGTATTCCTTCTCAATGCTTTCCTTGGTGTTAACCTTAATAAAAAGGCGTCATCTCCC	387856	Hs.251699	GO:0005737	NP_001013657	Chromosome 12 open reading frame 68
ASHG19A3A046416	131.135	140.676	96.3774	138.555	117.331	166.241	95.1592	89.9192	171.911	168.855	119.097	202.017	6.9262	7.06278	6.8362	7.57627	6.89392	7.15157	6.65116	7.29807	6.87324	7.26194	6.84772	7.28995	coding	NM_000062	SERPING1	RefSeq_coding	1984	chr11	+	57365026	57382326		GACCCTGGGGGACTCTCTACTCAGTCTGCACTGGAGCTGCCTGGTGACCAGAAGTTTGGA	710	Hs.384598	GO:0030414|GO:0005515|GO:0004867|GO:0008015|GO:0007596|GO:0007597|GO:0006958|GO:0045087|GO:0001869|GO:0010951|GO:0030168|GO:0002576|GO:0005576|GO:0005576|GO:0005615|GO:0031093	NP_001027466	Serpin peptidase inhibitor, clade G (C1 inhibitor), member 1
ASHG19A3A018127	135.413	122.691	140.57	134.077	125.105	127.973	105.027	84.0732	207.906	140.538	125.543	178.338	6.97149	6.85149	7.35902	7.52526	6.98471	6.76939	6.79906	7.19623	7.13516	6.99375	6.9184	7.0965	coding	NM_001052	SSTR4	RefSeq_coding	1258	chr20	+	23016056	23017314		TTTCTACGTGGTGCAGCTGCTGAACCTCTTCGTGACCAGCCTTGATGCCACCGTCAACCA	6754	Hs.673846	GO:0004930|GO:0004872|GO:0004994|GO:0007186|GO:0007187|GO:0008285|GO:0005887|GO:0005886|GO:0005886	NP_001043	Somatostatin receptor 4
ASHG19A3A017715	140.462	112.855	136.419	121.931	147.175	155.996	115.494	97.8287	231.662	156.821	171.714	207.791	7.02298	6.72338	7.32025	7.38139	7.1993	7.06183	6.93223	7.42353	7.28647	7.15556	7.32217	7.33362	coding	NM_181502	SPINLW1	RefSeq_coding	2445	chr20	-	44169266	44175016		AAGCAAACTGAAAGCAAACTTCCCTGACTCTCTAGAATTGCCTTGTGTCTGGCAAAGTGG
ASHG19A3A052242	800.624	325.765	294.788	123.007	1571.52	870.541	709.16	75.1182	596.18	325.32	858.324	700.077	9.51731	8.3663	8.35759	7.39519	10.6527	9.59379	9.56009	7.0284	8.62424	8.22293	9.49301	9.19667	coding	NM_001218	CA12	RefSeq_coding	3992	chr15	-	63615730	63674075		ATTGTCCATTATAACTCAGACCTTTATCCTGACGCCAGCACTGCCAGCAACAAGTCAGAA	771	Hs.210995	GO:0004089|GO:0016829|GO:0046872|GO:0008270|GO:0006730|GO:0016021|GO:0016020	NP_996808	Carbonic anhydrase XII
ASHG19A3A007393	1123.82	1460.34	889.793	285.105	1242.07	2145.33	858.558	1033.25	956.26	3042.4	1045.39	1944.9	10.0014	10.5734	9.90174	8.63395	10.2964	10.8741	9.83922	10.6521	9.30933	11.4602	9.77431	10.7431	coding	NM_001779	CD58	RefSeq_coding	1153	chr1	-	117057156	117113715	NR_026665,	GTGACAGAAAACCAGACAGAACCAACTCCAATTGATTGGTAACAGAAGATGAAGACAACA	965	Hs.34341	GO:0005515|GO:0007596|GO:0007155|GO:0016337|GO:0050900|GO:0031225|GO:0005887|GO:0005886	NP_001770	CD58 molecule
ASHG19A3A014517	212.934	287.342	109.571	197.985	128.181	171.349	138.532	90.2712	204.778	202.359	158.911	344.698	7.61474	8.18156	7.01542	8.10829	7.01556	7.19985	7.19676	7.30296	7.11356	7.53082	7.22032	8.1027	coding	NM_004288	CYTIP	RefSeq_coding	2282	chr2	-	158271130	158300604		ATCAGAATGCCTGCTCCTCGGAAATGTTCACTTTGATATGCAAAATACAGGAGGACAGCC	9595	Hs.270	GO:0005515|GO:0030155|GO:0005938|GO:0005737|GO:0005769	NP_004279	Cytohesin 1 interacting protein
ASHG19A3A021065	904.38	565.668	816.414	517.682	796.077	766.308	570.896	388.865	1267.02	735.091	1095.27	902.665	9.69092	9.20007	9.76308	9.46503	9.63771	9.40353	9.23979	9.37266	9.71974	9.43397	9.83562	9.58737	coding	NM_003363	USP4	RefSeq_coding	4120	chr3	-	49314576	49377536		AATCATCAGCAAGTCCCTATTCCTCAGTGTCTGCCTCTCTCATTGCAAATGGTGATAGCA	7375	Hs.77500	GO:0031685|GO:0008234|GO:0008233|GO:0005515|GO:0004221|GO:0004843|GO:0031397|GO:0016579|GO:0034394|GO:0031647|GO:0006511|GO:0005737|GO:0005764|GO:0005634	NP_955475	Ubiquitin specific peptidase 4 (proto-oncogene)
ASHG19A3A003169	62.7408	41.6891	118.776	52.5346	112.041	47.6777	59.887	18.566	106.101	78.601	166.431	87.4502	5.85386	5.20352	7.12661	6.07766	6.82586	5.32438	5.98428	4.95993	6.22296	6.15343	7.28186	5.99416	coding	NM_001163523	ITPRIPL1	RefSeq_coding	1947	chr2	+	96991068	96994090		CTCTTTAAGATCGTGTTCCTACTAACACTGACGATGCAGAGGCCTCCATGGCTGTGATAA	150771	Hs.65009	GO:0016021|GO:0016020	NP_848590	Inositol 1,4,5-triphosphate receptor interacting protein-like 1
ASHG19A3A034281	189.002	92.873	193.227	113.418	97.6544	129.854	79.3301	35.4985	98.955	70.5905	131.61	64.6156	7.4512	6.42599	7.78061	7.2703	6.63685	6.7897	6.38704	5.92418	6.12936	6.00013	6.97882	5.52479	coding	NM_001029835	CCM2	RefSeq_coding	1892	chr7	+	45067232	45116068		AATCTCTCCAAAGAAATTCCTCAAACAGAATTTCACACAGGGTATTCCATGGAGAATGAG	83605	Hs.148272	GO:0005515|GO:0061154|GO:0007229|GO:0051403|GO:0001570|GO:0005737	NP_113631	Cerebral cavernous malformation 2
ASHG19A3A003879	480.51	3668.25	359.205	1482.32	284.644	2040.78	452.709	2706.59	387.838	2701.78	494.058	2080.6	8.77269	11.8549	8.62722	10.8702	8.15105	10.8039	8.91062	11.8604	7.99552	11.2787	8.73303	10.8267	coding	NM_001223	CASP1	RefSeq_coding	1301	chr11	-	104896245	104972158	NM_001017534,	GCAGGGACGCTGGGACTCTCAGCAGCTCCTCAGGCAGTGCAGGACAACCCAGCTATGCCC	834	Hs.2490	GO:0008656|GO:0004197|GO:0008233|GO:0005515|GO:0006915|GO:0071260|GO:0043123|GO:0006508|GO:0042981|GO:0007165|GO:0005737|GO:0005829|GO:0005829|GO:0005622	NP_150637	Caspase 1, apoptosis-related cysteine peptidase (interleukin 1, beta, convertase)
ASHG19A3A002435	92.7906	128.028	42.3352	55.0721	101.342	100.411	61.9985	31.2616	44.3185	51.194	94.8331	181.621	6.4298	6.91361	5.72888	6.14608	6.6917	6.42492	6.0338	5.73464	5.01774	5.52329	6.54882	7.12535	coding	NM_001136473	LITAF	RefSeq_coding	2577	chr16	-	11641581	11680806		CCTGCGGGAGCCTGTGCCTGCTGGGGCAGGAGTGCAGTGGTACGATCGTAGCTCTCCGCA	9516	Hs.459940	GO:0003702|GO:0050699|GO:0004871|GO:0006915|GO:0043123|GO:0006357|GO:0007165|GO:0005794|GO:0005765|GO:0016020	NP_004853	Lipopolysaccharide-induced TNF factor
ASHG19A3A051811	667.996	1160.85	635.721	566.974	698.848	790.114	663.527	729.44	764.178	1580.23	707.979	374.693	9.25115	10.2655	9.41774	9.58186	9.4533	9.44788	9.45774	10.2212	8.9921	10.5436	9.23346	8.22958	coding	NM_181291	WDR20	RefSeq_coding	2597	chr14	+	102606211	102690009		GTGAAGATGCCCTTTTTACCCGTTGACGTTTATTTTACGTAAAATAAACTGTTGTTTCCA	91833	Hs.36859		NP_851825	WD repeat domain 20
ASHG19A3A002135	67.8277	51.839	57.0279	81.7637	54.2699	65.174	49.3244	55.8354	125.084	88.6869	73.2914	207.212	5.96927	5.52847	6.126	6.77	5.80799	5.77956	5.71392	6.58929	6.44484	6.32777	6.21033	7.32931	coding	NM_001130015	ANKRD33	RefSeq_coding	1779	chr12	+	52281792	52285504		AGCAAGTCCGTGCCAGAGCTGTTAGTGCCAGCCGAAGCCCAGTCCTTCAGGACACCAAAG	341405	Hs.433492		NP_872414	Ankyrin repeat domain 33
ASHG19A3A004164	2786.4	3030.05	2163.62	3020.24	1591.92	3287.64	2591.07	2678.99	3088.57	2730.45	2933.27	3976.78	11.3294	11.5933	11.169	11.7829	10.6727	11.4888	11.5264	11.8427	11.1907	11.2935	11.3154	11.7394	coding	NM_003583	DYRK2	RefSeq_coding	6010	chr12	+	68042511	68056443		GCCGCTCCCGCCGCCTACCCGACCGATTGGCGGCAGTAAGCACACAATGAATGATCACCT	8445	Hs.173135	GO:0005524|GO:0000287|GO:0030145|GO:0000166|GO:0004672|GO:0004674|GO:0004713|GO:0016740|GO:0042771|GO:0006915|GO:0045725|GO:0006468|GO:0005737|GO:0043231|GO:0005730|GO:0005634	NP_006473	Dual-specificity tyrosine-(Y)-phosphorylation regulated kinase 2
ASHG19A3A050410	157.993	121.814	197.522	177.968	178.848	327.564	148.217	136.755	223.883	149.263	186.799	69.9417	7.19114	6.84124	7.81187	7.94994	7.47705	8.14449	7.28761	7.91157	7.24015	7.08644	7.43415	5.65163	coding	NM_001001715	FARP1	RefSeq_coding	1321	chr13	+	98795433	98897556		CCTGAAAGGGTTTAGTTTTTAAAAGGAGTACCTCATTTACCATATTACTGTGTTCTGAGA	10160	Hs.403917	GO:0005089|GO:0005488|GO:0008092|GO:0005085|GO:0035023|GO:0005737|GO:0005856|GO:0019898|GO:0005622	NP_005757	FERM, RhoGEF (ARHGEF) and pleckstrin domain protein 1 (chondrocyte-derived)
ASHG19A3A048006	481.922	601.51	437.169	613.408	546.663	569.645	570.615	311.551	761.619	643.23	542.425	637.706	8.77751	9.29428	8.90383	9.67852	9.09992	8.95702	9.23933	9.06847	8.98598	9.22235	8.86057	9.04609	coding	NM_001137664	ANAPC7	RefSeq_coding	2224	chr12	-	110813273	110841535		TTGTAAGTACTTTCCCATGTTTCTATCTACTGTAGTCATTAAGAACTTGAGGTCTGAAGT	51434	Hs.719935	GO:0005488|GO:0031145|GO:0031145|GO:0000075|GO:0051301|GO:0007067|GO:0000278|GO:0007094|GO:0051436|GO:0051437|GO:0070979|GO:0051439|GO:0005680|GO:0005829|GO:0005829|GO:0005654|GO:0005654	NP_057322	Anaphase promoting complex subunit 7
ASHG19A3A001112	277.656	347.324	293.588	393.305	257.023	355.161	259.547	174.374	560.88	351.425	386.064	536.765	7.98932	8.4649	8.35112	9.08689	8.00235	8.26198	8.09709	8.25948	8.53822	8.33602	8.40807	8.78462	coding	NM_001024957	BRMS1	RefSeq_coding	1360	chr11	-	66104803	66112582		TGTGTCCCCTCAGAAGAGAAAATCGGATGACAGGCGGACCCACAGGCCCCTCAGGGTCTG	25855	Hs.100426	GO:0051059|GO:0005515|GO:0006915|GO:0032088|GO:0019987|GO:2000210|GO:0090312|GO:0005737|GO:0005634	NP_056214	Breast cancer metastasis suppressor 1
ASHG19A3A046511	3917.35	5097	4550.05	7213.15	3920.64	6041.06	3772.5	5675.23	3553.85	5196.88	4028.29	5421.99	11.8493	12.2938	12.2798	12.9505	12.0743	12.3805	12.1155	12.8044	11.4061	12.2267	11.8129	12.1642	coding	NM_001085372	C11orf83	RefSeq_coding	658	chr11	+	62439125	62439850		GAGACGCGAGTCGGATGTGGTGAACTGAAAGAACCAATAAAATCATGTTCCTCCACCCAG	790955	Hs.569009	GO:0005576	NP_001078841	Chromosome 11 open reading frame 83
CUST_4_PI418767722	77940.2	190982	74920.3	166885	64452.4	170811	75850.5	176499	91450.1	151942	64676.4	175542	16.4875	17.2479	16.6121	17.2033	16.4875	17.1586	16.5865	17.3717	16.6091	17.0238	16.3969	17.1822	coding	NM_006098	GNB2L1	RefSeq_coding	1125	chr5	-	180663927	180670906		TGTGGCAGGTGACCATTGGCACACGCTAGAAGTTTATGGCAGAGCTTTACAAATAAAAAA	10399	Hs.5662	GO:0005515|GO:0019903|GO:0005102|GO:0005737|GO:0030496|GO:0043025|GO:0005886	NP_006089	Guanine nucleotide binding protein (G protein), beta polypeptide 2-like 1
CUST_17_PI418767722	5914.89	13078.9	5369.17	13795.1	4797.27	12986.9	6050.69	12551.6	5902.31	12500.7	4891.2	10588.5	12.435	13.5068	12.5212	13.8937	12.3734	13.4861	12.8234	13.7463	12.2164	13.4975	12.0904	13.1029	coding	NM_003753	EIF3D	RefSeq_coding	1949	chr22	-	36906897	36925277		GATGCTTAGTGGAATGTGTGTCTAACTTGCTCTCTGACATTTAGCAGATGAAATAAAATA	8664	Hs.55682	GO:0005515|GO:0003743|GO:0003743|GO:0044267|GO:0001732|GO:0010467|GO:0006412|GO:0006413|GO:0006413|GO:0005737|GO:0005829|GO:0005829|GO:0005852	NP_003744	Eukaryotic translation initiation factor 3, subunit D
ASHG19A3A011661	2832.66	827.51	2235.72	1330.46	1852.87	1933.08	1408.79	680.432	4117.56	1353.45	3696.72	2245.31	11.3586	9.77378	11.2171	10.7269	10.918	10.7315	10.589	10.1205	11.6313	10.3296	11.6857	10.9379	coding	NM_001130915	MAMSTR	RefSeq_coding	1579	chr19	-	49216254	49222976		CAATGACCCTGGCGGCTTCCTCCCAGCGTTCCCAAATCATTCGCTCCAAGTTCCGATCTG	284358	Hs.191815	GO:0003676|GO:0005634	NP_872380	MEF2 activating motif and SAP domain containing transcriptional regulator
ASHG19A3A041736	17939.4	3901.01	12134.4	7384.64	9603.52	10484.1	7516.85	2817.81	22798.7	7137.73	19643.6	10576.4	14.1892	11.9336	13.8135	12.9768	13.4639	13.1762	13.1409	11.9118	14.4377	12.6997	14.3609	13.0989	coding	NM_001170760	SRPK3	RefSeq_coding	1999	chrX	+	153046455	153051186		GCCTCTTCCTCCCCCGCCCCAGGGGGCGGCCGTAGCCTCAGCGCGGGCTCACAGACCTCA	26576	Hs.104865	GO:0005524|GO:0000166|GO:0004674|GO:0016740|GO:0030154|GO:0007275|GO:0007517|GO:0060537|GO:0006468|GO:0005575	NP_055185	SRSF protein kinase 3
ASHG19A3A040554	614.113	2429.01	805.938	665.377	672.283	881.972	772.943	1092.91	1188.44	1633.41	609.006	629.719	9.13753	11.2935	9.74974	9.78757	9.40146	9.61275	9.68347	10.7244	9.62494	10.5877	9.01872	9.02309	coding	NM_017518	HAUS7	RefSeq_coding	1892	chrX	-	152713123	152736603	AK125219,	ATGAACTAATGGAGAAATAGAAAGTCTTCAGTGATGGCCTACGCCAAAGCACAGGATGGG	55559	Hs.170835	GO:0005515|GO:0031996|GO:0031996|GO:0007049|GO:0051301|GO:0051297|GO:0007067|GO:0051225|GO:0070652|GO:0005813|GO:0005737|GO:0005856|GO:0005874|GO:0005730|GO:0005886|GO:0005819	NP_059988	HAUS augmin-like complex, subunit 7
ASHG19A3A053618	254.796	274.413	173.051	136.002	308.942	870.486	263.315	125.815	321.224	389.814	354.449	483.273	7.8632	8.10532	7.62924	7.54821	8.27062	9.5934	8.11641	7.785	7.73611	8.48117	8.29358	8.62203	coding	NM_003039	SLC2A5	RefSeq_coding	2454	chr1	-	9097006	9129887	NR_024180,NM_001135585,	TGCCTTTGGGTCATCCTTCCAGTATGGGTACAACGTGGCTGCTGTCAACTCCCCAGCACT	6518	Hs.530003	GO:0005353|GO:0005355|GO:0022891|GO:0005975|GO:0008643|GO:0015755|GO:0015758|GO:0008645|GO:0055085|GO:0016021|GO:0005886	NP_003030	Solute carrier family 2 (facilitated glucose/fructose transporter), member 5
ASHG19A3A015424	408.503	3866.94	315.957	5909.11	365.791	4121.34	330.915	2445.07	429.062	3991.21	444.062	10934.5	8.53969	11.9224	8.45496	12.6831	8.51119	11.8137	8.44507	11.7278	8.14643	11.8713	8.59494	13.1511	coding	NM_002246	KCNK3	RefSeq_coding	3978	chr2	+	26915580	26954066		CTGCCTATCTGTCTTCACACTGAGAATGGCGCCCAATAAATGCTATCCACGGAGACCAGG	3777	Hs.645288	GO:0005252|GO:0005267|GO:0008022|GO:0046982|GO:0042803|GO:0005244|GO:0007420|GO:0071456|GO:0071294|GO:0090102|GO:0006811|GO:0071805|GO:0006813|GO:0051481|GO:0042493|GO:0007268|GO:0005887|GO:0005886	NP_002237	Potassium channel, subfamily K, member 3
ASHG19A3A012893	46304.8	98804	44510	69022.6	32267.7	66672.4	44374.5	74034.4	59803.8	74835.3	40899	71672.7	15.7106	15.9594	15.8077	15.9803	15.4262	15.7539	15.7815	15.8255	16.024	15.8495	15.6765	15.9037	coding	NM_012423	RPL13A	RefSeq_coding	1142	chr19	+	49990864	49995562		ACAGGCATCGCCCATGCTCCTCACCTGTATTTTGTAATCAGAAATAAATTGCTTTTAAAG	23521	Hs.523185	GO:0003735|GO:0044267|GO:0031018|GO:0010467|GO:0006412|GO:0006414|GO:0006415|GO:0019058|GO:0016032|GO:0019083|GO:0005829|GO:0005829|GO:0015934|GO:0030529	NP_036555	Ribosomal protein L13a
ASHG19A3A021514	639.272	954.733	602.242	712.259	613.128	673.368	771.574	405.988	798.899	1287.37	655.863	652.86	9.19063	9.99307	9.33728	9.87791	9.26343	9.21404	9.68133	9.42893	9.05616	10.2546	9.11685	9.09006	coding	NM_017836	SLC41A3	RefSeq_coding	2349	chr3	-	125725200	125803134	NM_001164475,NM_001008487,	AGAAGGTAAAGAAGAGGCATGTCCAGTATGCTTTGCAGGGTGTGTTTGCTCTTTTCCATG	54946	Hs.573007	GO:0008324|GO:0016021|GO:0005886	NP_060306	Solute carrier family 41, member 3
ASHG19A3A035026	124.144	1926.87	134.395	486.583	145.172	2086.94	168.796	97.0097	169.932	1617.17	119.634	366.67	6.846	10.9831	7.30006	9.38547	7.18098	10.8397	7.48161	7.41138	6.85582	10.572	6.85312	8.19414	coding	NM_013332	C7orf68	RefSeq_coding	1432	chr7	+	128095883	128098471		AGTTTTGTGGCGGGAAGCTTCTGCGCTGGTGCTTAGTAACCGACTTTCCTCCGGACTCCT	29923	Hs.706124	GO:0005102|GO:0035425|GO:0008284|GO:0006950|GO:0009986|GO:0005615|GO:0016021|GO:0016020|GO:0030141	NP_037464	Chromosome 7 open reading frame 68
ASHG19A3A031045	756.526	1622.76	568.874	499.738	1074.04	1458.34	1039.81	143.959	1391.52	953.972	607.285	1571.95	9.43103	10.7202	9.25916	9.41644	10.0757	10.316	10.1218	7.99114	9.86495	9.82898	9.01601	10.4433	coding	NM_002810	PSMD4	RefSeq_coding	1332	chr1	+	151227196	151239952	NR_002319,ENST00000480546,	ATCCTGTCCAAGCTACATACTGTCCAACCCAAGGGCAAGATCACCTTCTGCACGGGCATC	5710	Hs.505059	GO:0005515|GO:0008270|GO:0006977|GO:0006281|GO:0000082|GO:0000216|GO:0016070|GO:0000084|GO:0031145|GO:0031145|GO:0006915|GO:0000075|GO:0034641|GO:0016071|GO:0000278|GO:0051436|GO:0051437|GO:0042981|GO:0006521|GO:0051439|GO:0016032|GO:0000502	NP_002801	Proteasome (prosome, macropain) 26S subunit, non-ATPase, 4
ASHG19A3A044334	326.29	550.107	305.615	382.026	300.601	419.291	325.594	283.756	294.798	499.843	279.765	401.448	8.22995	9.15529	8.40943	9.04934	8.22784	8.50209	8.41828	8.94013	7.61813	8.86145	7.97171	8.34112	coding	NM_001134375	CCNJ	RefSeq_coding	4153	chr10	+	97803158	97820623		GCAAATAGCAAGTATGGTGCTAAAGTCTACACCAATGGAATTAGATGAGTGCTATGCACT	54619	Hs.596479	GO:0005634	NP_061957	Cyclin J
ASHG19A3A022606	862.999	578.037	714.62	258.293	1141.34	695.792	835.534	126.162	955.037	548.854	1111.09	669.4	9.62572	9.23123	9.58113	8.50209	10.1692	9.26383	9.79627	7.78979	9.30822	8.98657	9.8543	9.12842	coding	NM_199069	NDUFAF3	RefSeq_coding	1387	chr3	+	49059073	49060924		GCTACGTAGCTTGTACCGAGCGCGACCCTCGCTGCGCTGTCCGCCCGTTGAGCTTCCCTG	25915	Hs.31387	GO:0005515|GO:0032981|GO:0016020|GO:0005743|GO:0005739|GO:0005634	NP_951056	NADH dehydrogenase (ubiquinone) 1 alpha subcomplex, assembly factor 3
ASHG19A3A005947	331.393	723.316	244.698	107.775	494.732	530.773	379.307	173.265	730.199	778.097	390.402	571.251	8.25198	9.57719	8.10254	7.19451	8.95845	8.85388	8.65549	8.24852	8.91841	9.51905	8.42398	8.87854	coding	NM_139322	ATRN	RefSeq_coding	3967	chr20	+	3451664	3596550		AATTTCACCTGGCCCATCAAAATTCAGGTGCAAACTGAACAATGAGGACGCATGGACACA	8455	Hs.276252	GO:0005488|GO:0004872|GO:0005529|GO:0006954|GO:0040014|GO:0006979|GO:0005737|GO:0005576|GO:0005615|GO:0005887|GO:0005886	NP_647538	Attractin
ASHG19A3A004121	332.165	294.446	294.281	159.263	278.587	302.846	258.953	143.978	486.062	180.825	312.46	316.609	8.2567	8.215	8.35489	7.78636	8.11525	8.03281	8.09302	7.99131	8.32441	7.36192	8.12262	7.97508	coding	NM_003256	TIMP4	RefSeq_coding	1463	chr3	-	12194572	12200647		ATCATCACTACCATCTGAACTGTGGCTGCCAAATCACCACCTGCTACACAGTACCCTGTA	7079	Hs.591665	GO:0004857|GO:0046872|GO:0008191|GO:0008150|GO:0007417|GO:0042698|GO:0034097|GO:0042493|GO:0032496|GO:0043434|GO:0005576|GO:0005615|GO:0005578|GO:0030017	NP_003247	TIMP metallopeptidase inhibitor 4
ASHG19A3A032338	142.423	183.795	84.3897	108.913	177.272	210.822	154.822	21.5631	181.711	180.28	128.592	221.162	7.04284	7.48432	6.65116	7.21036	7.46415	7.50035	7.3533	5.19402	6.94808	7.35741	6.95109	7.42798	coding	NM_033657	DAP3	RefSeq_coding	1650	chr1	+	155658873	155708317	NR_027023,ENST00000452809,	TGGACCGACACGGGTATTGTACCGCTGAGGGAAAGGAGCGGGACTCCGGACCTCCAGGAG	7818	Hs.516746	GO:0005515|GO:0008637|GO:0008624|GO:0005761|GO:0005739|GO:0005730|GO:0005730|GO:0005634|GO:0015935	NP_387506	Death associated protein 3
ASHG19A3A043245	13442.1	3774.75	9528.9	5662.78	7969.92	7808.18	6448.21	3476.2	13277.2	5513.8	12130.6	5790.13	13.7002	11.8924	13.4227	12.6241	13.1646	12.7519	12.92	12.1812	13.5239	12.3188	13.4929	12.2582	coding	NM_005029	PITX3	RefSeq_coding	1407	chr10	-	103989945	104001231		TCTCCAGGCTTCCCCTCCCTCGTTTTCAAAGATAAATGAAATAAACGTGCGCGGACTGTC	5309	Hs.137568	GO:0043565|GO:0003700|GO:0016563|GO:0071542|GO:0002088|GO:0002089|GO:0007626|GO:0030901|GO:0007275|GO:0048666|GO:0009887|GO:0006355|GO:0005634	NP_005020	Paired-like homeodomain 3
ASHG19A3A008408	4561.03	5578.67	6158.73	6669.73	5333.45	5214.5	4668.23	4252.45	5318.26	6161.25	6692.58	5079.09	12.0927	12.4255	12.7195	12.8372	12.5334	12.1674	12.4516	12.4462	12.0392	12.5041	12.5392	12.0695	coding	NM_001098833	ATXN7L3	RefSeq_coding	3635	chr17	-	42269173	42275529		TAGCTAACTTTGTAAACGCTGTGTATTCCCTCTGCCCCCATGGCTGCTGGTGTAAATAAA	56970	Hs.512651	GO:0030374|GO:0046872|GO:0005515|GO:0003713|GO:0016568|GO:0016578|GO:0045893|GO:0000124|GO:0005634	NP_064603	Ataxin 7-like 3
ASHG19A3A006609	176.928	144.611	146.01	147.695	191.784	216.603	127.917	98.2616	179.861	156.945	134.69	172.668	7.35697	7.10515	7.40798	7.67305	7.57511	7.53695	7.08296	7.43029	6.93521	7.15738	7.01141	7.04425	coding	NM_182580	CYB561D1	RefSeq_coding	4944	chr1	+	110036700	110043062		TTTCTGACAGCGCTGTCCCGGCCAGGAACCAGTCTTTTCTCCTGGCACCCTGTATTCATG	284613	Hs.514682	GO:0046872|GO:0022900|GO:0006810|GO:0016021|GO:0016020	NP_872386	Cytochrome b-561 domain containing 1
ASHG19A3A001404	352.363	161.987	425.926	182.124	337.369	239.194	288.42	164.935	584.016	212.92	494.109	276.86	8.33551	7.28631	8.86848	7.98404	8.39845	7.68671	8.24922	8.18435	8.59362	7.60945	8.73351	7.7711	coding	NM_001042412	CYLD	RefSeq_coding	8608	chr16	+	50776028	50835846		AGCCGGGGCGAGGGGCGACGCCCCGCCGCCCGAGTTTCCCCCTTTCTAGGGTGAGGATGG	1540	Hs.578973	GO:0008234|GO:0046872|GO:0008233|GO:0070064|GO:0005515|GO:0019901|GO:0003735|GO:0004221|GO:0004843|GO:0008270|GO:0016055|GO:0007049|GO:0042347|GO:0032088|GO:0090090|GO:0032480|GO:0070536|GO:0070507|GO:0007346|GO:0006412|GO:0006511|GO:0005737|GO:0005881|GO:0005856|GO:0005829|GO:0031234|GO:0005622|GO:0030496|GO:0048471|GO:0005886|GO:0005840	NP_056062	Cylindromatosis (turban tumor syndrome)
ASHG19A3A035343	90.9892	121.279	47.0423	51.326	57.0395	139.062	55.7336	35.3386	37.9265	81.6587	46.632	96.1395	6.40036	6.83447	5.8699	6.03683	5.87352	6.89001	5.88581	5.91739	4.80143	6.20883	5.61259	6.1425	coding	NM_016118	NUB1	RefSeq_coding	3112	chr7	+	151038857	151075530		ATATTGATCCATCAAAAGTGGACAATTTGTTGCAGTTGGGGTTTACTGCCCAGGAAGCCC	51667	Hs.647082	GO:0005515|GO:0032436|GO:0016567|GO:0034341|GO:0034612|GO:0006511|GO:0005634	NP_057202	Negative regulator of ubiquitin-like proteins 1
ASHG19A3A005381	130.621	115.57	68.412	39.5761	129.727	113.078	85.0368	49.506	130.439	111.875	87.0544	147.974	6.9206	6.76094	6.364	5.63096	7.03294	6.59125	6.48916	6.40781	6.50096	6.67073	6.43461	6.80663	coding	NM_024828	C9orf82	RefSeq_coding	2833	chr9	-	26840683	26892826		CAGCGTCTCGGGCTCCTTGCAGCAGGAAACTAAATATATTTTGCCAACTTTGGAAAAAGA	79886	Hs.178357		NP_079104	Chromosome 9 open reading frame 82
ASHG19A3A006520	3687.24	2072.48	3999.93	1970.84	3268.1	2515.67	2277.83	1642.56	4954.82	2487.2	5568.15	3356.88	11.7512	11.0807	12.0876	11.2327	11.7811	11.1067	11.3253	11.2327	11.927	11.1592	12.2732	11.5	coding	NM_181077	GOLGA8A	RefSeq_coding	4264	chr15	-	34671271	34682001	NM_001023567,	GCTTCTGGTGGTTGCCACTCATCTGAGGCTTCCTCCTCCGCCTCCTCCTCTCTGCATGCG	440270	Hs.720151	GO:0005794|GO:0032580|GO:0016020	NP_001018861	Golgin A8 family, member B
ASHG19A3A017098	95.0289	92.2403	92.8624	73.3748	94.2343	104.664	67.7191	54.5976	82.8512	74.3444	91.4005	96.4963	6.46211	6.41576	6.78491	6.5991	6.5865	6.4834	6.16604	6.55419	5.88799	6.0748	6.50085	6.14859	coding	NM_001632	ALPP	RefSeq_coding	2883	chr2	+	233243347	233247597		TGATTTAAACCCGGGCAGCCTGGAGTGCAGCTCATACTCCATGCCCAGAATTCCTGCCTC	250	Hs.284255	GO:0004035|GO:0004035|GO:0016787|GO:0046872|GO:0031225|GO:0009986|GO:0016021|GO:0005886	NP_001623	Alkaline phosphatase, placental
ASHG19A3A011813	3460.42	980.626	2516.96	1595.24	1946.11	1965.75	1665.82	942.88	5120.45	1850.63	4178.04	2369.52	11.6578	10.0307	11.398	10.9586	10.9967	10.7579	10.847	10.5402	11.9788	10.7633	11.8613	11.0136	coding	NM_144687	NLRP12	RefSeq_coding	3871	chr19	-	54296856	54327648		AGAGTGAGAAAGCATTATTTCAGCAAAAGGTCTTTCCTCCCTTGCTCTCTCCTCCAACCA	91662	Hs.631573	GO:0005524|GO:0008656|GO:0000166|GO:0005515|GO:0006919|GO:0043124|GO:0045751|GO:0050710|GO:0050711|GO:0045409|GO:0031953|GO:0009968|GO:0050729|GO:0050718|GO:0045381|GO:0008588|GO:0007165|GO:0005737	NP_653288	NLR family, pyrin domain containing 12
ASHG19A3A015721	14323.1	8535.02	12976.4	5239.34	23000.1	18029.9	19147.7	12997.4	25005	13505.9	25010.5	10761.6	13.8135	13.0093	13.9568	12.5167	14.8356	13.9258	14.5599	13.7844	14.5804	13.6135	14.8075	13.1276	coding	NM_005917	MDH1	RefSeq_coding	1268	chr2	+	63816121	63834328		GATGGCAACTCCTATGGTGTTCCTGATGATCTGCTCTACTCATTCCCTGTTGTAATCAAG	4190	Hs.526521	GO:0030060|GO:0051287|GO:0005488|GO:0004470|GO:0016491|GO:0006734|GO:0005975|GO:0044262|GO:0006094|GO:0006006|GO:0006108|GO:0006107|GO:0055114|GO:0006099|GO:0005813|GO:0005737|GO:0005829|GO:0005739|GO:0005625	NP_005908	Malate dehydrogenase 1, NAD (soluble)
ASHG19A3A026678	80.2267	57.1163	61.4366	52.4513	67.5064	63.4606	57.7761	37.5901	231.985	78.1454	95.7949	113.881	6.21797	5.67437	6.21617	6.07535	6.1053	5.73805	5.93523	6.00419	7.28815	6.14331	6.56223	6.40973	coding	NM_144647	CAPSL	RefSeq_coding	1019	chr5	-	35904397	35938881		GTGATCCCAGGTCCTCCAATTAATACTAAGAGAGTGGACCAGGGCCCCTGAGGAAGACAG	133690	Hs.55150	GO:0005509|GO:0005737	NP_653248	Calcyphosine-like
ASHG19A3A025826	317.972	291.627	211.807	116.238	446.624	447.895	383.695	100.023	679.987	361.053	354.046	453.624	8.19523	8.20306	7.91234	7.30752	8.8032	8.60082	8.67347	7.45656	8.81211	8.37081	8.29238	8.53165	coding	NM_015143	METAP1	RefSeq_coding	2835	chr4	+	99916787	99983959		ATTGTGGGCATGGAATCCACAAGCTTTTTCATACAGCTCCCAATGTACCCCACTATGCTA	23173	Hs.480364	GO:0004177|GO:0046872|GO:0008235|GO:0008233|GO:0005515|GO:0031365|GO:0009987|GO:0018206|GO:0006508|GO:0006417|GO:0005737	NP_055958	Methionyl aminopeptidase 1
ASHG19A3A006128	92.1136	107.966	91.0859	40.1485	95.1974	110.022	100.935	53.3856	110.159	58.5587	59.1434	50.7247	6.41831	6.65495	6.75938	5.65386	6.60152	6.55259	6.7376	6.52049	6.27316	5.71835	5.92883	5.1535	coding	NM_152357	ZNF440	RefSeq_coding	4181	chr19	+	11925106	11946016	NM_021915,	ACCAAAACCCCAGGAGAAACTTCAGGAGTCTCATAGAAGAAAAAGTCAATGAAATTAAAG	126070	Hs.418192	GO:0003677|GO:0046872|GO:0008270|GO:0006355|GO:0005622|GO:0005634	NP_689570	Zinc finger protein 440
ASHG19A3A006295	222.707	144.009	107.175	30.511	174.059	243.204	113.802	24.8187	147.352	280.993	218.875	130.412	7.67447	7.09718	6.98167	5.21207	7.4405	7.71235	6.91297	5.39953	6.66013	8.01303	7.64288	6.62145	coding	NM_172087	TNFSF13	RefSeq_coding	2245	chr17	+	7461608	7464925		GCAGTGCTCACCCAAAAACAGAAGAATGACTCCGATGTGACAGAGGTGATGTGGCAACCA	8741	Hs.54673	GO:0005125|GO:0005515|GO:0005102|GO:0005164|GO:0016070|GO:0006955|GO:0016071|GO:0008284|GO:0048298|GO:0007165|GO:0005576|GO:0005615|GO:0016020|GO:0005654	NP_742085	Tumor necrosis factor (ligand) superfamily, member 13
ASHG19A3A041911	53190	56572.1	47748.6	136652	28846.7	68375.9	36816.4	53426.9	38774.3	95743.9	35343.3	120868	15.8729	15.2051	15.8764	16.8774	15.2286	15.7966	15.5261	15.3725	15.2797	16.1682	15.4242	16.5461	coding	NM_013230	CD24	RefSeq_coding	2194	chrY	-	21152525	21154705		TGTGTGTGTGAATGAACACTCTTTTGCTTTATTCCAGAATGCTGTACATCTATTTTGGAT	100133941	Hs.644105	GO:0005515|GO:0019901|GO:0030296|GO:0004871|GO:0032597|GO:0031295|GO:0016055|GO:0007411|GO:0001775|GO:0016477|GO:0016337|GO:0032600|GO:0042632|GO:0007204|GO:0002768|GO:0008629|GO:0032913|GO:0043406|GO:0042104|GO:0061098|GO:0043408|GO:0001959|GO:0030856|GO:0042325|GO:0045730|GO:0043627|GO:0001666|GO:0002237|GO:0031225|GO:0009986|GO:0016020|GO:0045121|GO:0005886	NP_037362	CD24 molecule
ASHG19A3A010897	843.32	80.2672	641.387	101.373	456.943	66.2998	427.958	48.1808	409.886	226.808	496.189	218.726	9.58998	6.19826	9.42995	7.10099	8.83541	5.80417	8.82949	6.36665	8.07991	7.70222	8.74077	7.41196	coding	NM_001080400	PLIN4	RefSeq_coding	6353	chr19	-	4502191	4517716		CCACTGCACCAGCAATGCTAGAAAACCAAGCCAATAAAAGTGATTTCTTTTTTCATTAAA	729359	Hs.591387	GO:0005737|GO:0005811|GO:0005886	NP_001073869	Perilipin 4
ASHG19A3A028696	547.552	350.678	457.284	293.235	533.014	371.956	455.507	343.265	1541.73	578.892	884.506	906.372	8.96416	8.48041	8.96917	8.6781	9.06198	8.33071	8.92014	9.20282	10.0424	9.06515	9.53789	9.59316	coding	NM_177478	FTMT	RefSeq_coding	894	chr5	+	121187649	121188521		AAAGTCAGCTGTCTCCTGCTTTCTTGCCCTTAAAATCACCTCCATCTTTATATTCTTCTG	94033	Hs.105324	GO:0005488|GO:0008199|GO:0004322|GO:0046914|GO:0006879|GO:0006826|GO:0055114|GO:0008284|GO:0051349|GO:0051353|GO:0051347|GO:0005739	NP_803431	Ferritin mitochondrial
ASHG19A3A049219	2115.61	2239.25	1843.2	1521.68	1447.27	1452.49	1542.79	1714	1683.41	2188.79	1644.32	701.456	10.9296	11.1847	10.935	10.8979	10.533	10.3115	10.7238	11.2903	10.1838	10.9971	10.4317	9.19888	coding	NM_001142641	FBRSL1	RefSeq_coding	4563	chr12	+	133067156	133161771		ACCCTGTTTGTTTTAAATATTCTGTTCCCATGTCAATCAGTGACGATAAATACAGCCTTG	57666	Hs.411138		NP_001136113	Fibrosin-like 1
ASHG19A3A028364	160.885	213.315	98.8852	134.669	112.092	198.788	156.638	76.3877	212.068	266.677	114.327	151.651	7.21837	7.72595	6.87048	7.53163	6.82679	7.41059	7.37304	7.05331	7.16808	7.94204	6.79567	6.84323	coding	NM_014813	LRIG2	RefSeq_coding	4015	chr1	+	113615830	113667342		ATCTATAGCTGCATGGCACAAAATACAGCAGGAGGTCTCTCAGCAAATGCTTCCCTAACA	9860	Hs.448972	GO:0005737|GO:0016021|GO:0005886	NP_055628	Leucine-rich repeats and immunoglobulin-like domains 2
ASHG19A3A054963	1706.89	6091.64	1945.47	2809.05	1742.88	7240.45	3673.38	3527.95	3651.43	8515.84	3262.05	3501.43	10.6062	12.5587	11.0192	11.694	10.8231	12.6329	12.0635	12.2077	11.4467	12.9455	11.4751	11.5607	coding	NM_182705	FAM101B	RefSeq_coding	3895	chr17	-	289773	295731		TGACACCTGCCCCACTCCATTTTGCTTTGTGATGTCTTCATTTAACAATAAATTATCTGA	359845	Hs.729155		NP_874364	Family with sequence similarity 101, member B
ASHG19A3A052393	8480.27	4466.96	7074.05	2515.98	13945.2	9423.38	8815.15	4970.9	15204.8	5524.7	10970.9	10256.5	12.9921	12.1127	12.9373	11.5572	14.0127	13.0263	13.4103	12.6365	13.7318	12.3242	13.3359	13.0565	coding	NM_004255	COX5A	RefSeq_coding	784	chr15	-	75212618	75230495		ATGCTCGCTGGGTAACATACTTCAACAAGCCAGATATAGATGCCTGGGAATTGCGTAAAG	9377	Hs.401903	GO:0004129|GO:0009055|GO:0046872|GO:0022904|GO:0016020|GO:0005743|GO:0005739	NP_004246	Cytochrome c oxidase subunit Va
ASHG19A3A037740	556.519	507.28	590.303	758.887	608.817	1100.65	463.826	344.077	1028.43	868.923	698.384	641.786	8.99081	9.03182	9.31095	9.96147	9.25376	9.92071	8.94518	9.20661	9.40919	9.69179	9.20998	9.05908	coding	NM_000136	FANCC	RefSeq_coding	4612	chr9	-	97861337	98079991		ATAAAGCATGCTGGTAAAACCACTACCCTCAGAGAGAGCCAAAAATACAGAAGAGGCGGA	2176	Hs.494529	GO:0005515|GO:0006281|GO:0006461|GO:0000785|GO:0005737|GO:0005829|GO:0005654|GO:0005634	NP_000127	Fanconi anemia, complementation group C
ASHG19A3A021105	204.368	146.828	96.3871	26.5762	230.134	226.179	172.88	31.3724	176.17	191.235	172.088	133.478	7.56224	7.13007	6.83653	4.99485	7.84269	7.60267	7.51797	5.74021	6.90898	7.44578	7.32602	6.65418	coding	NM_006545	NPRL2	RefSeq_coding	1672	chr3	-	50384918	50388486		TTTGACACAGTCCAAGTGTACATCATCACCAAGCCAGAGCTGCAGAACAAGCTTATCACT	10641	Hs.437083	GO:0005515|GO:0004672|GO:0033673	NP_006536	Nitrogen permease regulator-like 2 (S. cerevisiae)
ASHG19A3A017561	789.862	320.506	1029.32	372.763	698.979	464.063	841.668	509.62	2541.38	565.657	1532.79	615.324	9.49371	8.33649	10.1092	9.01695	9.45353	8.65842	9.80501	9.73544	10.8575	9.03327	10.3239	8.98782	coding	NM_080675	SUN5	RefSeq_coding	1267	chr20	-	31571581	31592239		GCCCAGAGAGCAGCCTCACCAGAACCCCTACCCTAAGAGAGATTAAAATTTATTCTTTAC	140732	Hs.375186	GO:0003674|GO:0007283|GO:0005575	NP_542406	Sad1 and UNC84 domain containing 5
ASHG19A3A005348	130.707	106.242	178.548	89.4391	147.158	167.313	157.445	121.067	314.04	153.483	175.698	191.48	6.92157	6.6277	7.67006	6.91184	7.19892	7.16292	7.38101	7.73065	7.70486	7.12699	7.35682	7.20498	coding	NM_024300	CHCHD7	RefSeq_coding	1703	chr8	+	57124314	57131174	NM_001011669,	AGAAACTCATGCACCAAACTCGAACTGGTAAGAAGACTGTTAGAATGCCCTCGGTAACAC	79145	Hs.436913	GO:0005739	NP_077276	Coiled-coil-helix-coiled-coil-helix domain containing 7
ASHG19A3A041750	157.878	97.3405	213.677	122.773	189.154	99.5224	158.277	104.417	456.871	112.008	245.02	133.013	7.19052	6.49755	7.92342	7.39217	7.5571	6.41163	7.3871	7.52046	8.23631	6.67197	7.80129	6.65116	coding	NM_020061	OPN1LW	RefSeq_coding	1234	chrX	+	153409724	153424505	NM_001048181,NM_000513,	TACTTTGCCAAAAGTGCCACTATCTACAACCCCGTTATCTATGTCTTTATGAACCGGCAG	5956	Hs.592247	GO:0004930|GO:0009881|GO:0007602|GO:0018298|GO:0050896|GO:0007165|GO:0007601|GO:0005887|GO:0005886	NP_064445	Opsin 1 (cone pigments), long-wave-sensitive
ASHG19A3A044595	783.037	345.875	425.775	347.595	510.118	686.976	347.344	235.952	632.101	460.689	565.501	620.242	9.48111	8.45981	8.86808	8.919	8.99644	9.24808	8.52081	8.68014	8.70608	8.73374	8.91766	8.99837	coding	NM_007329	DMBT1	RefSeq_coding	7686	chr10	+	124320180	124403252	NM_004406,NM_004406,	ACAATGGCTGGCTCTCCCATAACTGTGGCCATAGTGAAGACGCTGGTGTCATCTGCTCAG	1755	Hs.279611	GO:0051636|GO:0051637|GO:0048306|GO:0008329|GO:0005044|GO:0005044|GO:0035375|GO:0030855|GO:0030855|GO:0043152|GO:0045087|GO:0044419|GO:0007275|GO:0002221|GO:0015031|GO:0009615|GO:0005737|GO:0005576|GO:0019898|GO:0016020|GO:0030670|GO:0042589	NP_060049	Deleted in malignant brain tumors 1
ASHG19A3A000966	1766.13	921.77	1291.14	1481.69	1347.55	3410.82	1409.36	616.656	2042.84	1863.12	1915.96	1095.06	10.6541	9.93908	10.4162	10.8688	10.4249	11.5422	10.5905	9.98827	10.4987	10.7746	10.6635	9.8974	coding	NM_001012718	IL32	RefSeq_coding	1093	chr16	+	3115312	3119667		GACCCCAGACCTCTGTCTCTCTCGGCAGGCCTTGGCTCCTTGAACTTTTGGCCGCCATGT	9235	Hs.943	GO:0005125|GO:0007155|GO:0006952|GO:0006955|GO:0005576|GO:0005615	NP_004212	Interleukin 32
ASHG19A3A035692	897.558	476.157	855.964	531.093	896.149	618.694	752.106	484.313	2227.51	641.159	1195.06	857.274	9.67901	8.93443	9.84228	9.50015	9.81516	9.0864	9.6408	9.66954	10.6462	9.21742	9.94585	9.50596	coding	NM_001007243	STAR	RefSeq_coding	2641	chr8	-	38000217	38008600	NM_000349,	TATCCTTGACCCCTTCCTTTGCACAGTGAGTGATGGCGTTTTTATCTCCTGATGATGATG
ASHG19A3A029019	130.488	303.969	140.071	57.8713	119.475	247.379	168.559	87.7325	354.338	433.507	196.505	117.598	6.91869	8.25965	7.35365	6.22522	6.91612	7.74129	7.48067	7.26327	7.86772	8.64182	7.49739	6.45925	coding	NM_152406	AFAP1L1	RefSeq_coding	4223	chr5	+	148651400	148721365		AGGAAGAGGAGCCCATCCATCGTAGCCTCCAACCAAGGAAGGGTGCTACAGAAAGCCAAG	134265	Hs.483793	GO:0005515	NP_689619	Actin filament associated protein 1-like 1
ASHG19A3A005822	112.801	86.4256	89.6477	94.1511	109.295	105.299	93.3696	66.0233	103.037	72.8322	75.8973	120.292	6.71009	6.31991	6.7348	6.98952	6.79031	6.49127	6.62654	6.83755	6.18365	6.04892	6.25331	6.49297	coding	NM_133635	POFUT2	RefSeq_coding	2878	chr21	-	46683843	46707811		ACCAGTGGATCTGCGCACACGCCAGGTTTTTTATTGGCACCTCAGTCTCAACATTTTCTT	23275	Hs.592164	GO:0046922|GO:0016757|GO:0005975|GO:0006004|GO:0005783	NP_598368	Protein O-fucosyltransferase 2
ASHG19A3A039469	1512.36	2943.18	1598.8	5844.36	1115.71	3650.61	1195.95	4736.27	1547.22	3996.61	1367.46	4448.07	10.4336	11.5553	10.722	12.6636	10.1356	11.6451	10.331	12.5765	10.0452	11.874	10.1553	11.8887	coding	NM_021138	TRAF2	RefSeq_coding	2298	chr9	+	139780964	139821066		GAGAGCTTGCCATCCAGCTCACGAAGACAGAGTTATTAAACCATTCAAATCTCTGTGGTC	7186	Hs.522506	GO:0005174|GO:0019899|GO:0016874|GO:0046872|GO:0005515|GO:0004871|GO:0046625|GO:0004842|GO:0008270|GO:0007250|GO:0006919|GO:0008633|GO:0006915|GO:0043623|GO:0008624|GO:0043507|GO:0051092|GO:0050870|GO:0002726|GO:0032743|GO:0051091|GO:0070534|GO:0051865|GO:0051865|GO:0006461|GO:0070207|GO:0042981|GO:0007165|GO:0033209|GO:0035631|GO:0005737|GO:0005829|GO:0005829|GO:0009898	NP_066961	TNF receptor-associated factor 2
ASHG19A3A028924	125.775	516.938	77.6026	76.6021	58.2785	244.485	103.04	89.6814	41.4201	446.046	54.0602	26.0265	6.86584	9.06281	6.53535	6.66315	5.90057	7.7231	6.77081	7.29383	4.92497	8.6839	5.80725	4.07606	coding	NM_018939	PCDHB6	RefSeq_coding	3030	chr5	+	140529838	140532866		TTACTGAAGTGTCAACACATTAGTTTGTGAGCCTCATGTAAGAACATGATGGTCTTTTTT	56130	Hs.283085	GO:0005509|GO:0016339|GO:0007155|GO:0007156|GO:0007399|GO:0007416|GO:0007268|GO:0016021|GO:0005887|GO:0005886	NP_061762	Protocadherin beta 6
ASHG19A3A039915	215.486	238.724	182.913	242.098	231.508	245.751	174.609	173.832	293.349	253.626	227.965	344.569	7.63023	7.89813	7.70202	8.40101	7.85046	7.73127	7.53181	8.2537	7.61153	7.86733	7.70126	8.10204	coding	NM_133179	XAGE3	RefSeq_coding	543	chrX	-	52891559	52897119		AGTTGTGAGGGTGTGAGGGTCGCGTTCCTGCTGTCTGGACTTTTTCTGTCCCACTGAGAC	170626	Hs.43879		NP_573440	X antigen family, member 3
ASHG19A3A002133	579.209	350.648	576.134	206.514	704.452	1016.78	434.159	67.596	496.084	621.752	393.763	122.267	9.04982	8.4802	9.27708	8.16558	9.46484	9.81404	8.84885	6.87198	8.35759	9.17803	8.4352	6.51948	coding	NM_001130012	SLC9A3R2	RefSeq_coding	2192	chr16	+	2076887	2089026		GCCTGGTTCCGACAAGGACACTGAGGATGGCAGTGCCTGGAAGCAAGATCCCTTCCAGGA	9351	Hs.440896	GO:0008013|GO:0016247|GO:0019902|GO:0008022|GO:0005515|GO:0005102|GO:0048839|GO:0006461|GO:0016324|GO:0005737|GO:0012505|GO:0005634|GO:0005886	NP_004776	Solute carrier family 9 (sodium/hydrogen exchanger), member 3 regulator 2
ASHG19A3A018584	1344.44	141.299	789.228	647.179	1229.44	803.553	483.039	50.3755	960.214	265.347	1079.93	170.543	10.2504	7.06934	9.72184	9.74495	10.2838	9.47421	9.00342	6.43482	9.31311	7.93582	9.81516	7.02485	coding	NM_017806	LIME1	RefSeq_coding	1206	chr20	+	62367977	62370459		AGAAGCGCAAAGGGACCCATCGCAGTCCCCAAGAGCCACAGCAGGGGAAGACTGAGGTGA	54923	Hs.233220	GO:0016021|GO:0005886	NP_060276	Lck interacting transmembrane adaptor 1
ASHG19A3A025591	96.1905	51.2666	84.6701	51.7109	152.303	64.5859	185.156	54.1021	228.548	62.007	113.003	83.6514	6.4786	5.51051	6.65528	6.05183	7.24936	5.76508	7.60995	6.5401	7.26876	5.80812	6.78216	5.92388	coding	NM_012108	STAP1	RefSeq_coding	1524	chr4	+	68424445	68472617		AAATATGATCCTGAGGCCTGGTAGTGACAGTAGAAACTACTCCATCACTATTCGGCAGGA	26228	Hs.435579	GO:0005070|GO:0006944|GO:0006886|GO:0007165|GO:0007169|GO:0005737	NP_036240	Signal transducing adaptor family member 1
ASHG19A3A001346	559.94	1202.8	551.322	2775.04	555.019	1960.91	388.884	1052.75	568.019	1431.19	654.881	2098.97	9.00144	10.321	9.22016	11.6777	9.12323	10.7518	8.69383	10.6778	8.55713	10.4059	9.11313	10.8391	coding	NM_001040161	C16orf13	RefSeq_coding	563	chr16	-	684428	686347		ACGTGGACCAGCGCTGCCTGGACAGGAACCCAGAATGGGGGCTTCGGGACACAGCCCTCC	84326	Hs.239500		NP_115742	Chromosome 16 open reading frame 13
ASHG19A3A001970	271.593	236.453	332.658	326.623	274.131	276.333	241.001	239.152	535.087	249.963	420.288	304.853	7.95609	7.88398	8.52504	8.8316	8.09186	7.8953	7.99092	8.70168	8.47397	7.8487	8.51984	7.91486	coding	NM_001126241	TP73	RefSeq_coding	2728	chr1	+	3607235	3650467		ACCACGCCGACCCCAGCCTCGTCAGGACCTGGGGGCCCTGAAGATCCCCGAGCAGTACCG	7161	Hs.697294	GO:0003682|GO:0003684|GO:0003690|GO:0046872|GO:0002039|GO:0010843|GO:0005515|GO:0003700|GO:0016563|GO:0008134|GO:0016564|GO:0042771|GO:0006978|GO:0008630|GO:0007049|GO:0007050|GO:0034644|GO:0033326|GO:0048546|GO:0030900|GO:0021766|GO:0006954|GO:0006298|GO:0031571|GO:0043508|GO:0043524|GO:0000122|GO:0048666|GO:0045793|GO:0043193|GO:0010552|GO:0045893|GO:0009791|GO:0051262|GO:0001836|GO:0006974|GO:…	NP_005418	Tumor protein p73
ASHG19A3A031114	538.012	282.261	664.378	403.972	818.295	386.655	483.452	339.884	1108.94	317.503	1444.42	442.633	8.93841	8.15313	9.47828	9.12298	9.67666	8.38776	9.00546	9.19034	9.52641	8.18726	10.2275	8.49329	coding	NM_003540	HIST1H4F	RefSeq_coding	368	chr6	+	26240653	26241021		CTGAGCCTCACCCCGGCTTTTTATTTAACAGCTCACCCATAAAAGGCCCTTTTCAGGGCC	8361	Hs.247816		NP_003531	Histone cluster 1, H4f
ASHG19A3A049805	59.7469	65.2515	55.4984	47.7224	52.7852	65.3858	58.6889	38.8591	83.029	69.6588	59.5233	77.1931	5.78674	5.87941	6.08912	5.92327	5.77234	5.78593	5.95709	6.05571	5.88985	5.98079	5.9369	5.80353	coding	NM_052867	NALCN	RefSeq_coding	6923	chr13	-	101706129	102068813		TTGCATTTCCATGATGTTTGAGTCCCCGTTTCGAAGAGTCATGCATGCACCTACTTTGCA	259232	Hs.525146	GO:0005272|GO:0005244|GO:0006811|GO:0006814|GO:0055085|GO:0016021|GO:0016020	NP_443099	Sodium leak channel, non-selective
ASHG19A3A054698	152.645	81.405	81.1421	75.701	126.584	138.266	62.199	40.575	107.02	130.284	84.4472	112.119	7.14641	6.21995	6.5991	6.6456	7.00167	6.88164	6.03815	6.11618	6.23252	6.88931	6.39349	6.38826	coding	NM_024712	ELMO3	RefSeq_coding	2548	chr16	+	67233027	67237926		ATCATCCACAGTGCAGCACCAATGGGCGACGAGATGGCTCATCACCTGTACGTACTGCAG	79767	Hs.377416	GO:0017124|GO:0005488|GO:0006915|GO:0006909|GO:0005737|GO:0005856	NP_078988	Engulfment and cell motility 3
ASHG19A3A036200	77.9464	69.1669	53.8501	62.183	71.3271	91.9966	56.2279	45.1028	47.7499	116.146	55.4939	87.6199	6.17579	5.97028	6.04785	6.33651	6.18876	6.29591	5.89784	6.26766	5.11604	6.72095	5.84516	5.99662	coding	NM_003695	LY6D	RefSeq_coding	806	chr8	-	143866297	143868008		CACTCCTTCTGTTTTGTTGCCGTTTATTTTTGTACTCAAATCTCTACATGGAGATAAATG	8581	Hs.415762	GO:0005515|GO:0007155|GO:0030098|GO:0031225|GO:0009986|GO:0005624|GO:0005886	NP_003686	Lymphocyte antigen 6 complex, locus D
ASHG19A3A038173	148.874	134.655	163.182	119.445	143.385	134.214	108.954	100.615	173.585	173.672	199.397	181.057	7.11053	6.99359	7.55473	7.34785	7.16521	6.83915	6.85173	7.46586	6.88732	7.30504	7.51924	7.1207	coding	NM_017585	SLC2A6	RefSeq_coding	2563	chr9	-	136336216	136344276		AACCTGACTCTGGGGCTGTACATCCACTTTGGCCCCAGGCCTCTGAGCCCCAACAGCACT	11182	Hs.244378	GO:0055056|GO:0005355|GO:0022891|GO:0008643|GO:0015758|GO:0055085|GO:0016021|GO:0016020|GO:0005886	NP_060055	Solute carrier family 2 (facilitated glucose transporter), member 6
ASHG19A3A005811	158.255	109.733	120.291	72.4975	142.001	156.938	82.6587	57.6693	141.05	132.993	164.814	129.647	7.19451	6.67656	7.14353	6.57965	7.14966	7.06958	6.44811	6.63726	6.59832	6.91801	7.27015	6.61072	coding	NM_133454	SGSM1	RefSeq_coding	6018	chr22	+	25202135	25322813	NM_001098498,	GATGACGGAAACAGAAAGGAAAGAGTCCTCCCAGAGCTGCAGTTCGGGCCGCCAGAACAT	129049	Hs.474397	GO:0005097|GO:0032313|GO:0005794|GO:0005622	NP_597711	Small G protein signaling modulator 1
ASHG19A3A004476	104.134	101.675	96.3889	96.1184	111.958	119.177	68.9034	68.399	119.034	107.366	118.016	128.402	6.59125	6.56608	6.83663	7.02223	6.82403	6.66603	6.19293	6.8888	6.37932	6.60997	6.83545	6.59291	coding	NM_006182	DDR2	RefSeq_coding	3172	chr1	+	162602227	162750237		CCACAGAGAATGCTCTGCACCCGTTGATACTCCAGTTCCAACACCATCTTCTGAGATGAT	4921	Hs.593833	GO:0005524|GO:0005518|GO:0000166|GO:0004872|GO:0004714|GO:0007155|GO:0008284|GO:0006468|GO:0007165|GO:0007169|GO:0016324|GO:0005887|GO:0016020	NP_006173	Discoidin domain receptor tyrosine kinase 2
ASHG19A3A020423	9377.58	81924.9	9133.4	33250.1	5583	37425	11956.5	65333.5	10195.7	57984.2	11695	58939	13.1521	15.6765	13.3498	15.0475	12.6171	14.8953	13.8563	15.6236	13.0637	15.505	13.4252	15.6114	coding	NM_002305	LGALS1	RefSeq_coding	586	chr22	+	38071612	38075807		AACTACATGGCAGCTGACGGTGACTTCAAGATCAAATGTGTGGCCTTTGACTGAAATCAG	3956	Hs.445351	GO:0016936|GO:0001948|GO:0030395|GO:0043236|GO:0005515|GO:0042803|GO:0004871|GO:0005529|GO:0006915|GO:0071333|GO:0071407|GO:0033555|GO:0045445|GO:0010812|GO:0010977|GO:0043123|GO:0034120|GO:0042981|GO:0048678|GO:0042493|GO:0007165|GO:0009986|GO:0005737|GO:0031012|GO:0005576|GO:0005615|GO:0005622|GO:0005634|GO:0005578	NP_002296	Lectin, galactoside-binding, soluble, 1
ASHG19A3A054762	479.327	1471.99	246.023	1594.09	86.7938	1037.19	209.197	1061.99	214.539	1177.4	157.896	935.039	8.76803	10.5848	8.1085	10.9582	6.46411	9.84198	7.78468	10.6878	7.18393	10.1238	7.21224	9.6408	coding	NM_000734	CD247	RefSeq_coding	1687	chr1	-	167399877	167487847		ATGACAAAATCATCTTTGTGAAGGCCTCGCAGGAAGACCCAACACATGGGACCTATAACT	919	Hs.156445	GO:0042802|GO:0005515|GO:0042803|GO:0004888|GO:0031295|GO:0050852|GO:0007166|GO:0044419|GO:0050690|GO:0050776|GO:0016032|GO:0042101|GO:0042105|GO:0005737|GO:0016021|GO:0005886|GO:0005886|GO:0005886	NP_932170	CD247 molecule
ASHG19A3A038057	170.141	167.554	156.923	193.977	163.89	206.441	146.293	164.159	419.784	314.326	303.979	381.162	7.29731	7.34432	7.50391	8.07913	7.35365	7.46864	7.27015	8.17773	8.11625	8.17443	8.08642	8.25765	coding	NM_001035534	FAM129B	RefSeq_coding	3818	chr9	-	130267618	130341268		AACTGGGCCAGTTCCGGTCCCTTCCTTTTGGGGCTCTCACTCTGGAGGATGGGGTGGATG	64855	Hs.522401	GO:0005515	NP_073744	Family with sequence similarity 129, member B
ASHG19A3A018764	645.141	340.143	447.299	444.226	423.703	547.636	392.639	326.26	743.479	577.16	649.688	649.036	9.20238	8.4335	8.94205	9.2535	8.72609	8.89859	8.71066	9.1318	8.94775	9.0616	9.10189	9.07864	coding	NM_181602	KRTAP6-1	RefSeq_coding	219	chr21	-	31986005	31986223		TCCCGCTCCCTCTGTGGCTATGGCTATGGATGCGGCTCTGGCTCTGGCTACTATTATTGA	337966	Hs.553689	GO:0005829|GO:0005882	NP_853633	Keratin associated protein 6-1
ASHG19A3A009402	338.757	697.475	342.728	777.298	236.199	402.333	246.803	315.323	335.807	576.33	251.01	614.042	8.28116	9.5252	8.56745	9.99651	7.87909	8.44568	8.02562	9.08372	7.79706	9.05889	7.83277	8.98322	coding	NM_013975	LIG3	RefSeq_coding	3701	chr17	+	33307537	33332088		ATTCAGCCTGACACGCTTTGCCAGGAACAAACCTCATGTGAAAGAAAACAAAATGAATTT	3980	Hs.100299	GO:0005524|GO:0003677|GO:0003910|GO:0003909|GO:0003909|GO:0016874|GO:0046872|GO:0000166|GO:0005515|GO:0008270|GO:0006266|GO:0051103|GO:0006281|GO:0006260|GO:0033151|GO:0006284|GO:0007049|GO:0051301|GO:0007131|GO:0007283|GO:0005622|GO:0005654|GO:0005654|GO:0005634	NP_039269	Ligase III, DNA, ATP-dependent
ASHG19A3A019675	96.6497	113.621	54.6632	86.6107	91.8692	147.21	69.9628	98.7295	200.866	154.816	101.319	225.893	6.48396	6.73534	6.06723	6.85736	6.54842	6.97449	6.21409	7.43616	7.08542	7.13829	6.63713	7.46099	coding	NM_001017981	RNF215	RefSeq_coding	1922	chr22	-	30774804	30783302		TCGAGTGGAAGTTGACCTTGTGGACCACCTGTGGCCTCTCCAAGGATGGCTATGGAGGAT	200312	Hs.592194	GO:0046872|GO:0008270|GO:0016021|GO:0016020	NP_001017981	Ring finger protein 215
ASHG19A3A019993	856.376	309.449	1197.61	599.457	568.866	636.432	765.199	407.672	1191.19	474.728	1818.05	781.132	9.61387	8.284	10.3147	9.64977	9.15799	9.12751	9.66652	9.43492	9.62838	8.77449	10.5807	9.3552	coding	NM_001145137	CPT1B	RefSeq_coding	2721	chr22	-	51007290	51016506		GGCGCGGCTGGCGGCGGGGCCGGCCTAAGCGCGCCCGCGCACCCATCTGCCCCCGTCCTA	1375	Hs.439777	GO:0008415|GO:0004095|GO:0016740|GO:0006853|GO:0044255|GO:0006635|GO:0006631|GO:0046320|GO:0006810|GO:0016021|GO:0016020|GO:0005792|GO:0005741|GO:0005739	NP_689452	Carnitine palmitoyltransferase 1B (muscle)
ASHG19A3A048684	256.549	196.327	230.651	134.102	233.011	217.479	229.026	125.04	684.207	282.068	380.964	295.389	7.8732	7.59594	8.02505	7.52566	7.8603	7.54249	7.91805	7.77728	8.82109	8.01964	8.39294	7.86565	coding	NM_001005490	OR6C74	RefSeq_coding	939	chr12	+	55641071	55642009		GTTGCCCCCATGTTGAATCCCTTTATTTATACACTGAGAAACAAACAAGTAAAAGATGTT	254783	Hs.554556	GO:0004984|GO:0004872|GO:0050896|GO:0007608|GO:0016021|GO:0005886	NP_001005490	Olfactory receptor, family 6, subfamily C, member 74
ASHG19A3A030251	522.383	1041.31	581.416	1555.73	655.712	666.165	569.154	297.95	631.283	434.12	501.332	601.358	8.89943	10.1143	9.28912	10.9258	9.36441	9.19702	9.23469	9.00729	8.70336	8.64363	8.75831	8.94931	coding	NM_001170755	NBPF15	RefSeq_coding	4802	chr1	+	148558187	148596267		TATATTTCTGGCCCCCCAGTGTCAGTCCATTCATGACAAAGTTTGACCAGTCTTTGCCAA	284565	Hs.656782	GO:0005737	NP_775909	Neuroblastoma breakpoint family, member 15
ASHG19A3A002566	286.382	428.458	266.19	450.569	273.355	358.474	293.421	239.122	467.36	483.402	410.563	636.78	8.03741	8.77751	8.21942	9.27545	8.0877	8.27783	8.26983	8.70138	8.26534	8.80408	8.48503	9.04278	coding	NM_001142554	TRMT1	RefSeq_coding	2195	chr19	-	13215713	13227463		AGGCCAAGGTCAAGGCCTCAGCCAGGGCCAAGTTCTCTGCAGCCTGTGGTCCCCCTGTGA	55621	Hs.515169	GO:0003723|GO:0046872|GO:0008168|GO:0004809|GO:0016740|GO:0008270|GO:0008033	NP_060192	TRM1 tRNA methyltransferase 1 homolog (S. cerevisiae)
ASHG19A3A036982	235.829	476.962	186.158	168.544	232.424	787.624	240.762	285.534	173.978	636.714	231.885	199.903	7.75091	8.93636	7.72487	7.87209	7.85626	9.44233	7.98878	8.94723	6.89169	9.211	7.72409	7.27266	coding	NM_178172	GPIHBP1	RefSeq_coding	2296	chr8	+	144295067	144299043		TAACTGTTCTCTTCTTTTCCTTATTAATAAAACACACAATGCCTAGCTGGGGGGTCGGAA	338328	Hs.426410	GO:0034185|GO:0035478|GO:0008035|GO:0035473|GO:0008289|GO:0071813|GO:0042632|GO:0006869|GO:0090321|GO:0051006|GO:0050821|GO:0071503|GO:0070328|GO:0031362|GO:0009897|GO:0034364|GO:0016021|GO:0005886	NP_835466	Glycosylphosphatidylinositol anchored high density lipoprotein binding protein 1
ASHG19A3A000940	117.496	95.0775	85.5257	102.241	119.278	140.408	121.145	87.5429	265.855	204.105	178.271	267.367	6.76493	6.46196	6.66817	7.11475	6.91372	6.90534	7.00032	7.25974	7.47304	7.54409	7.37342	7.72119	coding	NM_001011722	ARHGEF10L	RefSeq_coding	4269	chr1	+	17907047	18024369		GCACCGAGTGTCCTTCCAGCCCAAGATGACCCAGCTCATGAAGGCCGCCAAGAGCGGGAC	55160	Hs.443460	GO:0005089|GO:0005085|GO:0035023|GO:0005737|GO:0005622	NP_060595	Rho guanine nucleotide exchange factor (GEF) 10-like
ASHG19A3A049592	129.192	52.965	85.1515	77.009	63.9459	112.567	67.2278	31.7299	107.229	79.979	142.128	73.4032	6.90471	5.56087	6.66293	6.67302	6.02772	6.58458	6.15591	5.75848	6.23459	6.17835	7.07659	5.72563	coding	NM_152720	NEK3	RefSeq_coding	2255	chr13	-	52706779	52733510		TTCCAGGAGAAAGGGCCCTCACGGGTGAGCGGGGCGACTGGGCTCCCCCGCGGTGCAGTT	4752	Hs.409989	GO:0005524|GO:0046872|GO:0000166|GO:0005515|GO:0004674|GO:0016740|GO:0007049|GO:0051301|GO:0007067|GO:0006468|GO:0005634	NP_689933	NIMA (never in mitosis gene a)-related kinase 3
ASHG19A3A042955	123.049	87.6615	136.72	74.9493	109.859	133.612	124.052	68.1645	256.61	81.8341	159.239	120.102	6.83481	6.33966	7.32356	6.62842	6.79601	6.83237	7.03648	6.88367	7.42371	6.21208	7.2224	6.49084	coding	NM_018207	TRIM62	RefSeq_coding	3865	chr1	-	33611003	33647671		AAGGGAAAAATCCATGAGACCAACCTCACATATGAAGACTTCCCGACCTCCAAGTACACA	55223	Hs.656006	GO:0046872|GO:0008270|GO:0005622	NP_060677	Tripartite motif-containing 62
ASHG19A3A020904	98.1698	105.658	72.2582	88.1386	74.3314	103.146	87.9027	71.6463	109.535	121.894	99.9526	137.934	6.50583	6.61954	6.4344	6.88638	6.24785	6.46411	6.53664	6.95883	6.26366	6.7945	6.6209	6.70365	coding	NM_001171172	CX3CR1	RefSeq_coding	3224	chr3	-	39304985	39321930		TGAAGGCTCCCCATTAATGAGAGCTGACTGTGCTGTGCTTTGCTGACTGCAGGGCCTGCT	1524	Hs.78913	GO:0004930|GO:0004950|GO:0004896|GO:0005515|GO:0004872|GO:0007186|GO:0007155|GO:0006968|GO:0021795|GO:0006935|GO:0044419|GO:0048246|GO:0002282|GO:0016525|GO:0043066|GO:0009611|GO:0005887|GO:0005886	NP_001328	Chemokine (C-X3-C motif) receptor 1
ASHG19A3A048460	26374.7	5803.87	19476.4	11383.1	14453.9	14762.5	11388.8	3766.47	28624.8	9607.96	29063.6	13590.5	14.842	12.4835	14.5861	13.6212	14.0687	13.6415	13.7963	12.2874	14.8328	13.1134	15.0732	13.4604	coding	NM_001171888	FGFR1OP2	RefSeq_coding	998	chr12	+	27091304	27113677		GGGTCCATTTTAAAAGTGCTTTTACATTGAATTTCCCTCCCAGATTAGATCAGCAAATAA	26127	Hs.591162	GO:0009611|GO:0005737	NP_056448	FGFR1 oncogene partner 2
ASHG19A3A036412	52.7391	49.6852	44.0049	36.8705	42.2377	36.7242	31.5739	28.9465	49.6281	52.4815	53.102	46.5317	5.60763	5.46118	5.78027	5.51785	5.46956	4.94602	5.05904	5.62193	5.17068	5.55823	5.78529	5.01237	coding	NM_001100161	XPO7	RefSeq_coding	4907	chr8	+	21777179	21864095		TGGGGGGGAGGGGGGGCCGGAGAGGAGCATGAATGGAGCAAAATGGCGGATCATGTGCAG
ASHG19A3A041706	476.781	307.302	474.341	326.505	451.489	420.716	394.62	250.537	742.052	403.771	635.615	534.735	8.76109	8.27508	9.01951	8.83089	8.81937	8.5073	8.71848	8.76362	8.94493	8.53297	9.07447	8.77773	coding	NM_175868	MAGEA6	RefSeq_coding	1787	chrX	+	151867244	151870814		TGCAGCCTCAGCATGCGCTGGCCGGATGTACCCTGAGGTGCCCTCTCACTTCCTCCTTCA	4105	Hs.441113	GO:0003674|GO:0005515|GO:0008150|GO:0005575	NP_787064	Melanoma antigen family A, 6
ASHG19A3A005313	3200.34	2183.88	2946.57	1424.1	2819.55	2419.77	2675.79	1371.62	5831.94	1966.36	4310.79	2644.05	11.5353	11.1429	11.6313	10.8131	11.5493	11.044	11.5748	10.9962	12.1964	10.8487	11.9043	11.1809	coding	NM_022874	SMN1	RefSeq_coding	1545	chr5	+	70220767	70248836	NM_022877,	ATGCCAGGGCCAAGACTGGGACCAGGAAAGATAATTCCCCCACCACCTCCCATATGTCCA	6606	Hs.535788		NP_075012	Survival of motor neuron 1, telomeric
ASHG19A3A045471	101.715	185.392	220.248	137.226	164.209	167.653	165.672	162.619	193.506	196.955	296.164	250.891	6.5565	7.49779	7.96282	7.56327	7.35697	7.16601	7.45509	8.16488	7.036	7.49348	8.05124	7.61855	coding	NM_001080494	TTC39A	RefSeq_coding	2759	chr1	-	51752930	51787938		TTGGAGAAGGAGGAGGGAAAAAGGGGCTGTGGGATTTAGTGGCTGGGCTGCACCCCCTGG	22996	Hs.112949	GO:0005488|GO:0003674|GO:0008150|GO:0005575	NP_001138304	Tetratricopeptide repeat domain 39A
ASHG19A3A014782	2428.9	339.117	1497.21	653.642	1045.08	1137.26	853.456	196.628	1623.95	469.345	1441.38	575.613	11.1195	8.42995	10.6215	9.75535	10.0307	9.96883	9.83052	8.43111	10.125	8.75855	10.2245	8.88787	coding	NM_001126240	TP73	RefSeq_coding	2822	chr1	+	3607235	3650467	NM_005427,NM_001126242,	TTTTAACAGGATTGGGGTGTCCAAACTGCATCGAGTATTTCACCTCCCAAGGGTTACAGA	7161	Hs.697294	GO:0003682|GO:0003684|GO:0003690|GO:0046872|GO:0002039|GO:0010843|GO:0005515|GO:0003700|GO:0016563|GO:0008134|GO:0016564|GO:0042771|GO:0006978|GO:0008630|GO:0007049|GO:0007050|GO:0034644|GO:0033326|GO:0048546|GO:0030900|GO:0021766|GO:0006954|GO:0006298|GO:0031571|GO:0043508|GO:0043524|GO:0000122|GO:0048666|GO:0045793|GO:0043193|GO:0010552|GO:0045893|GO:0009791|GO:0051262|GO:0001836|GO:0006974|GO:…	NP_005418	Tumor protein p73
ASHG19A3A017017	59.792	56.0361	67.5638	80.1913	68.6206	73.4471	60.4853	42.5384	69.3306	98.6773	74.9585	99.163	5.78811	5.64802	6.34672	6.73966	6.13045	5.95971	5.99859	6.18307	5.63158	6.49225	6.23848	6.19521	coding	NM_201574	SLC4A3	RefSeq_coding	4255	chr2	+	220492291	220506701		AGCTGAGGGACGGTGATGGAACCACCGACCTGGCCCTGTCAAGTCCAAGGCTGCTGTGTT	6508	Hs.1176	GO:0015297|GO:0005452|GO:0005215|GO:0015701|GO:0006811|GO:0055085|GO:0006810|GO:0005887|GO:0005624|GO:0005886	NP_963868	Solute carrier family 4, anion exchanger, member 3
ASHG19A3A016971	18738.1	4975.95	18189.1	8077.89	14576.8	9941.16	12978.4	6479.8	31142.1	8373.58	25232.6	10769.4	14.27	12.2595	14.4837	13.0993	14.0862	13.1029	13.9631	12.9679	14.9731	12.9214	14.8258	13.1297	coding	NM_005731	ARPC2	RefSeq_coding	1424	chr2	+	219082119	219119070		TCCGTCCTTGCCTCCCTTACCCACCCTCACCGGCCCTTGTTTCTCCTTCCCCTGGGGGCA	10109	Hs.529303	GO:0003779|GO:0005515|GO:0005200|GO:0006928|GO:0030838|GO:0005885|GO:0005794|GO:0015629|GO:0031252|GO:0042995|GO:0005737|GO:0005925	NP_690601	Actin related protein 2/3 complex, subunit 2, 34kDa
ASHG19A3A048613	3596.53	20892.5	3121.73	4110.42	3735.76	5203.38	2612.51	6591.59	1368.51	15454.1	3534.93	3462.79	11.7176	14.0402	11.7278	12.1787	11.9946	12.1635	11.5392	12.9768	9.83822	13.7844	11.6131	11.5401	coding	NM_181711	GRASP	RefSeq_coding	1950	chr12	+	52400747	52409671		TCCACCGTTGTGCATATTGTTGCTTCTGAACCACAAACTGTATAAATGGATGGTTTTTTG	160622	Hs.407202	GO:0030306|GO:0030165|GO:0008104|GO:0007165|GO:0030054|GO:0005737|GO:0048471|GO:0005886|GO:0045211|GO:0045202	NP_859062	GRP1 (general receptor for phosphoinositides 1)-associated scaffold protein
ASHG19A3A046222	108.982	66.4983	77.3622	66.4033	85.3483	80.3303	99.9732	44.0834	100.869	79.0792	85.0654	129.812	6.65821	5.90796	6.53056	6.43829	6.44255	6.0937	6.72435	6.23605	6.15631	6.16221	6.40444	6.61427	coding	NM_003986	BBOX1	RefSeq_coding	1901	chr11	+	27062508	27149354		TGAACTGCTTGTTCACTTGCTGCTGTTGCCACTGCTGGTACAGAAATAGAAGGTAAGACA	8424	Hs.591996	GO:0008336|GO:0008336|GO:0008336|GO:0005506|GO:0046872|GO:0016491|GO:0016702|GO:0008270|GO:0045329|GO:0045329|GO:0034641|GO:0055114|GO:0015629|GO:0005737|GO:0005829|GO:0043231|GO:0005739	NP_003977	Butyrobetaine (gamma), 2-oxoglutarate dioxygenase (gamma-butyrobetaine hydroxylase) 1
ASHG19A3A021063	91.3787	139.282	67.3166	63.7707	79.7694	114.966	74.3623	26.6844	122.289	82.1631	97.1506	114.076	6.40474	7.04884	6.34166	6.37343	6.34896	6.6167	6.29753	5.50189	6.41484	6.21747	6.57904	6.4127	coding	NM_198562	C3orf62	RefSeq_coding	3590	chr3	-	49306029	49314508		TGTATTGATGCATTCCTCCATTTTGGCACCTGAAAGAGAGTCTTGGAGAACTGCAGGAGA	375341	Hs.403828		NP_940964	Chromosome 3 open reading frame 62
ASHG19A3A004533	100.485	248.914	124.784	264.994	73.5689	107.125	102.088	104.023	156.575	162.175	99.3499	233.717	6.53753	7.96052	7.19066	8.5378	6.23404	6.51495	6.75373	7.51605	6.74123	7.20424	6.6124	7.51023	coding	NM_006669	LILRB1	RefSeq_coding	2971	chr19	+	55128628	55149002		TGGTCTTTGTGCACATTTACATCAAGCTCAGCCTGGGCGGCACAGCCAGATGCGAGATGC	10859	Hs.667388	GO:0008157|GO:0004872|GO:0050776|GO:0009615|GO:0016021|GO:0005886	NP_006660	Leukocyte immunoglobulin-like receptor, subfamily B (with TM and ITIM domains), member 1
ASHG19A3A008372	311.537	1373.64	278.53	735.483	277.819	625.982	259.047	199.381	212.355	970.992	213.365	288.263	8.16281	10.4945	8.2855	9.91816	8.10952	9.10255	8.09399	8.45049	7.17048	9.85578	7.61229	7.82696	coding	NM_024927	PLEKHH3	RefSeq_coding	3076	chr17	-	40819932	40829048		CCAAGGGCTACAATGGGTGTGGGTAATTTTCTAGTTTGTTTCTTAATTTATTTGTAGAAG	79990	Hs.632251	GO:0007165|GO:0005856	NP_079203	Pleckstrin homology domain containing, family H (with MyTH4 domain) member 3
ASHG19A3A045945	116.701	114.689	90.6136	173.17	89.819	110.732	69.2343	65.387	117.311	83.3848	128.894	273.756	6.75595	6.75148	6.75078	7.91125	6.51481	6.56185	6.19941	6.82159	6.35718	6.23812	6.95367	7.75401	coding	NM_001025237	TSPAN4	RefSeq_coding	1479	chr11	+	844445	867116		CTCAGTCCCGACTGGGCTCTACCTGAGGACCCTGGGGAGCCTGGGCCTGGCCCTCCTCAG	7106	Hs.654836	GO:0006461|GO:0005887|GO:0005886	NP_003262	Tetraspanin 4
ASHG19A3A054793	2818.79	4247.48	2361.1	4357.09	2771.31	3519.63	2119.6	4081.45	2793.89	5083.96	2473.11	6084.04	11.3504	12.0454	11.307	12.2701	11.5221	11.5878	11.2171	12.3904	11.0123	12.1924	11.0646	12.3224	coding	NM_002811	PSMD7	RefSeq_coding	1678	chr16	+	74330680	74340184		CAGGGGTTGTGATCCAGCTCCATATATTGTTTACCTTCAAAGATACAATTAAATGGCTTG	5713	Hs.440604	GO:0005515|GO:0006977|GO:0000082|GO:0000216|GO:0016070|GO:0000084|GO:0031145|GO:0031145|GO:0006915|GO:0000075|GO:0034641|GO:0016071|GO:0000278|GO:0051436|GO:0051437|GO:0042981|GO:0006521|GO:0051439|GO:0016032|GO:0000502|GO:0005838	NP_002802	Proteasome (prosome, macropain) 26S subunit, non-ATPase, 7
ASHG19A3A054752	87.7315	49.2954	89.4153	47.622	76.574	58.2189	73.5069	34.4637	151.054	71.335	94.8641	100.94	6.34854	5.44934	6.73095	5.92053	6.28889	5.60965	6.2829	5.87665	6.69508	6.01472	6.54958	6.22213	coding	NM_007014	WWP2	RefSeq_coding	4527	chr16	+	69796273	69975643		TTTTACTATGTGGATCACAATACTCGGACCACCACCTGGCAGCGTCCGACCGCGGAGTAC	11060	Hs.408458	GO:0001085|GO:0001085|GO:0016881|GO:0016874|GO:0005515|GO:0008134|GO:0004842|GO:0004842|GO:0046718|GO:0044419|GO:0010629|GO:0010553|GO:0010553|GO:0051224|GO:0043433|GO:0032410|GO:0043161|GO:0070534|GO:0006464|GO:0016567|GO:0016567|GO:0016567|GO:0042787|GO:0005737|GO:0005622|GO:0005634|GO:0000151	NP_955456	WW domain containing E3 ubiquitin protein ligase 2
ASHG19A3A002859	518.24	390.009	759.463	400.1	615.81	428.421	489.527	348.691	890.676	496.336	961.391	684.066	8.88903	8.64735	9.66538	9.11359	9.26926	8.53422	9.02177	9.22539	9.21153	8.851	9.65814	9.15952	coding	NM_001145724	HOMER3	RefSeq_coding	1297	chr19	-	19040009	19049858		TGCCTCTGAACAGCATCTGACACAGGTGCCCCCGAGCCCTCTCGTCAGTGCCAACGGCCC	9454	Hs.720208	GO:0008022|GO:0005515|GO:0019904|GO:0007216|GO:0006605|GO:0030054|GO:0005575|GO:0005737|GO:0005886|GO:0014069|GO:0045211|GO:0045202	NP_004829	Homer homolog 3 (Drosophila)
ASHG19A3A025171	18845.1	8738.32	15311.6	8611.51	11489.2	10247.8	7655.16	10518.2	16948.8	10553.1	17002.7	8559.31	14.2803	13.042	14.2084	13.1826	13.725	13.1553	13.1762	13.5068	13.9196	13.2423	14.0971	12.8115	coding	NM_178557	NAT8L	RefSeq_coding	5894	chr4	+	2061238	2070815		TGCCCCTCCCCTGAATGGCCCCCAATGCTGCTGTTTTTCAATAAAACCAGAGTTGAAGGC	339983	Hs.318529	GO:0008415|GO:0017188|GO:0016740|GO:0008152|GO:0005737|GO:0016021|GO:0016020|GO:0005792|GO:0031966|GO:0030867	NP_848652	N-acetyltransferase 8-like (GCN5-related, putative)
ASHG19A3A010852	535.222	915.203	464.502	539.35	443.408	778.596	342.333	311.35	231.611	767.21	516.254	1133.56	8.93029	9.92993	8.99195	9.51905	8.78989	9.42593	8.50156	9.06764	7.28588	9.49742	8.79633	9.95216	coding	NM_016199	LSM7	RefSeq_coding	536	chr19	-	2321521	2328614		GAAAAAGGAGAGCATCTTGGACTTGTCCAAGTACATCGACAAGACGATCCGGGTAAAGTT	51690	Hs.512610	GO:0003723|GO:0017070|GO:0005515|GO:0008380|GO:0000398|GO:0005634|GO:0030529	NP_057283	LSM7 homolog, U6 small nuclear RNA associated (S. cerevisiae)
CUST_38_PI426249100	178.324	187.366	186.959	116.904	176.628	153.756	124.382	92.1582	207.216	161.586	183.364	192.313	7.36993	7.51457	7.73152	7.31703	7.46041	7.0387	7.04049	7.33277	7.13047	7.19878	7.40987	7.21098	coding	NM_004502_Exon1-	NM_004502	HOX cluster	503	chr17	-	46687880	46688383	NM_004502,	TTTCTAAATATCCAGCCTCAAGTTCGGTTTTCGCTACCGGAGCCTTCCCAGAACAAACTT
ASHG19A3A037594	1439.54	2566.03	1620.16	2462.33	1679.82	1860.04	1209.12	1796.7	1134.91	1877.74	2092.26	2110.29	10.361	11.3702	10.7405	11.5291	10.7587	10.6803	10.3475	11.3497	9.56441	10.7848	10.7989	10.847	coding	NM_018339	RFK	RefSeq_coding	2707	chr9	-	79000432	79009444		TAGCCATTGCTTTTGAGAATCAGATAGTGTGTTGTTTAGGGGTTAATTGTGTCTATATCT	55312	Hs.37558	GO:0005524|GO:0046872|GO:0000166|GO:0008531|GO:0008531|GO:0016740|GO:0009231|GO:0006766|GO:0006767|GO:0005737|GO:0005829	NP_060809	Riboflavin kinase
ASHG19A3A034228	213.909	385.285	155.813	228.616	148.76	306.188	199.94	247.15	325.596	373.081	172.835	291.99	7.62082	8.63107	7.49399	8.31671	7.21645	8.04806	7.72097	8.74664	7.75623	8.41569	7.33221	7.84752	coding	NM_020192	C7orf36	RefSeq_coding	907	chr7	+	39606002	39612480		AGGTTATAAGAAAGGTGCAGAAGTCATTTTAAACTATGGACGACTCCGAGGAACATTGAG	57002	Hs.83313		NP_064577	Chromosome 7 open reading frame 36
ASHG19A3A011423	498.193	449.163	592.886	273.644	463.773	230.937	523.125	938.629	1420.83	418.342	746.947	614.529	8.83015	8.84378	9.31607	8.5814	8.85633	7.63079	9.11378	10.5341	9.90489	8.58854	9.31338	8.98462	coding	NM_152657	GGN	RefSeq_coding	2168	chr19	-	38874991	38878668		AAGCTGGAGCACTACGACTTGCAGGCCACCCATTCCAACTGAGTGTAGTCGGCTCAACAC	199720	Hs.447948	GO:0046983|GO:0030154|GO:0007276|GO:0007275|GO:0008104|GO:0007283|GO:0005737|GO:0005730|GO:0048471	NP_689870	Gametogenetin
ASHG19A3A029578	90.0179	59.4338	57.113	65.7054	66.7409	68.4991	72.9023	71.8602	160.365	92.8812	94.9856	98.0202	6.38422	5.73881	6.12754	6.4192	6.08832	5.85395	6.26957	6.96394	6.77587	6.39612	6.55152	6.17514	coding	NM_033057	OR2B2	RefSeq_coding	1212	chr6	-	27878962	27880174		CAAAAAGCTATATTTGTTTCTGTTGCCTAAACATTTTCATTGAACAAGCCCCCAGAATTG	81697	Hs.307111	GO:0004984|GO:0004872|GO:0050896|GO:0007608|GO:0016021|GO:0005886	NP_149046	Olfactory receptor, family 2, subfamily B, member 2
ASHG19A3A038167	474.353	605.519	331.9	561.425	372.011	748.167	364.134	393.159	566.826	906.804	298.94	470.078	8.7531	9.3053	8.52213	9.5685	8.5333	9.368	8.59051	9.38695	8.55482	9.75834	8.06376	8.58448	coding	NM_006753	SURF6	RefSeq_coding	2352	chr9	-	136197552	136203047		AGATAGGATGTGAGGTGAGCATGAGCTTGAGCTGAGAGACAGACACAACAGTATCTGAAA	6838	Hs.274430	GO:0003677|GO:0003723|GO:0042254|GO:0001652|GO:0005730|GO:0044451|GO:0005634	NP_006744	Surfeit 6
ASHG19A3A036314	144.597	85.4423	109.304	103.981	119.571	126.539	115.91	72.8659	203.172	122.158	147.731	264.25	7.06317	6.30037	7.01202	7.13954	6.91712	6.75236	6.93868	6.98732	7.10152	6.79937	7.13084	7.70452	coding	NM_001164447	FAM90A10	RefSeq_coding	1395	chr8	+	7626498	7629509	NM_018088,NM_001164453,NM_001164448,NM_001136572,ENST00000511144,ENST00000444103,	CCTCTATGAGGACCTTCAGGTTTCCTCCTCCTCAGAGGACAGCGATTCTGACCTGGAGTG	441328	Hs.694406	GO:0003676|GO:0008270	NP_001157919	Family with sequence similarity 90, member A10
ASHG19A3A029012	418.376	346.46	573.547	292.215	459.126	290.682	400.267	392.96	1959.36	460.206	933.562	608.09	8.57277	8.46173	9.27224	8.67291	8.84227	7.97288	8.73489	9.38606	10.4365	8.73149	9.61882	8.96743	coding	NM_032566	SPINK7	RefSeq_coding	566	chr5	+	147691989	147695479		AATCTTGACTGAATGGAGAAAGTTTCTGTGCTACCCCTACAAACCCATGCCTCACTGACA	84651	Hs.244569	GO:0030414|GO:0005515|GO:0004867|GO:0005576	NP_115955	Serine peptidase inhibitor, Kazal type 7 (putative)
ASHG19A3A006822	496.01	101.967	693.815	153.829	473.039	248.05	517.14	204.85	1559.84	178.161	854.258	273.305	8.82203	6.57008	9.53764	7.73289	8.88816	7.74443	9.09977	8.48826	10.0619	7.34081	9.4891	7.75235	coding	NM_198883	MTX1	RefSeq_coding	1552	chr1	+	155178489	155183622		GATCATCACCCACCTTCGAAAAGAGGTACATACTTTTTGGATAGACACCAAGAACTACGT	4580	Hs.490874	GO:0005515|GO:0006626|GO:0015031|GO:0016021|GO:0016020|GO:0005743|GO:0005741|GO:0005739	NP_942584	Metaxin 1
ASHG19A3A007002	650.719	363.745	263.169	69.1844	745.18	875.943	463.603	23.1066	287.222	162.847	573.824	553.761	9.21455	8.53846	8.20306	6.50409	9.54826	9.6052	8.94436	5.29629	7.58341	7.20954	8.93716	8.83138	coding	NM_206873	PPP1CA	RefSeq_coding	1356	chr11	-	67165651	67169376		TCGATCATCGGGCGCCTGCTGGAAGGTGACATACACGGCCAGTACTACGACCTTCTGCGA	5499	Hs.183994	GO:0016787|GO:0046872|GO:0005515|GO:0008599|GO:0004722|GO:0005975|GO:0007049|GO:0051301|GO:0005977|GO:0006629|GO:0006470|GO:0019433|GO:0070688|GO:0072357|GO:0005737|GO:0005829|GO:0005730|GO:0005654|GO:0005634	NP_996756	Protein phosphatase 1, catalytic subunit, alpha isozyme
ASHG19A3A032453	1992.61	1513.5	1629.24	764.157	2060.53	2037.89	1849.43	758.313	5072.55	2071.34	2938.31	2968.79	10.8362	10.6193	10.7496	9.97197	11.0866	10.802	11.003	10.2721	11.9633	10.9231	11.3205	11.3398	coding	NM_198097	C7orf28B	RefSeq_coding	1785	chr7	-	6838571	6865861	NM_015622,	ATGAGAATTTTATACAAATACCTTACCACCTCCCTTTTCCCAAGGCACATCGAACCTGAG	221960	Hs.567779	GO:0005765|GO:0016020	NP_932765	Chromosome 7 open reading frame 28B
ASHG19A3A034430	486.212	327.481	648.343	388.201	617.731	389.669	590.643	240.147	1472.66	439.501	929.707	776.549	8.79234	8.37417	9.44482	9.07156	9.27493	8.402	9.28628	8.70824	9.96564	8.66201	9.61096	9.34493	coding	NM_001159522	ZNF727	RefSeq_coding	1679	chr7	+	63505820	63538925		TGAGTCCAGTACCCGTCTGTACTATTCCATCTCTTCCGCTCCATTAGCTCCTCGGTGACT	442319	Hs.640774	GO:0003677|GO:0046872|GO:0008270|GO:0006355|GO:0005622|GO:0005634	NP_001152994	Zinc finger protein 727
ASHG19A3A005090	838.342	775.978	308.788	290.328	376.208	574.291	383.257	72.9947	482.136	372.536	404.531	696.029	9.58014	9.68289	8.42311	8.66272	8.54977	8.96786	8.67092	6.98952	8.31392	8.41425	8.4661	9.18784	coding	NM_018959	DAZAP1	RefSeq_coding	2185	chr19	+	1407583	1435680		AGCTCAGCCAGACTTCCCCTATGGTCAGTATGCAGGTTACGGGCAGGACTTGAGTGGCTT	26528	Hs.222510	GO:0003723|GO:0000166|GO:0030154|GO:0007275|GO:0007283|GO:0005737|GO:0005730|GO:0005634	NP_733829	DAZ associated protein 1
ASHG19A3A011471	101.007	61.3821	128.955	42.4541	117.867	73.3351	118.318	68.4179	227.203	87.8654	203.69	111.596	6.54562	5.78798	7.23845	5.73935	6.89957	5.95709	6.96829	6.88915	7.26081	6.31459	7.5486	6.37873	coding	NM_024876	ADCK4	RefSeq_coding	2458	chr19	-	41197433	41222790		TACACGGTTGAATGACAAGTTCAACCTTCCCTAAAACCCCCGGTGACGAGTCCAGCCGCG	79934	Hs.130712	GO:0016301|GO:0004674|GO:0016740|GO:0016021|GO:0016020|GO:0005739	NP_079152	AarF domain containing kinase 4
ASHG19A3A006444	677.249	571.848	553.255	221.787	840.313	1051.25	658.053	390.291	944.166	712.056	864.507	1327.95	9.27224	9.21612	9.22487	8.27359	9.72435	9.86123	9.44448	9.37778	9.29094	9.38521	9.50302	10.184	coding	NM_176805	MRPS11	RefSeq_coding	1053	chr15	+	89010683	89021491		CGGCTCCCAGCCACACCAAGTTCAGCACACAGATCCAGGTAGTCTCTGCTAGTAATGAGC	64963	Hs.111286	GO:0003735|GO:0042769|GO:0006412|GO:0005622|GO:0005763|GO:0005739|GO:0005840	NP_789775	Mitochondrial ribosomal protein S11
ASHG19A3A047474	1681.48	3351.46	1322.98	1232.3	1595.31	2448.49	1915.02	1447.31	1882.86	1849.08	1573.75	3762.04	10.5796	11.7246	10.4505	10.6305	10.6764	11.0625	11.0632	11.0615	10.3712	10.7616	10.3634	11.6605	coding	NM_033114	ZCRB1	RefSeq_coding	1844	chr12	-	42705888	42719932		GGGTTGCATTTATTTTATTTTTGGATAAAGACTCTGCACAAAACTGTACCAGGGCAATAA	85437	Hs.496279	GO:0003723|GO:0046872|GO:0000166|GO:0008270|GO:0008380|GO:0006397|GO:0005689|GO:0005654|GO:0005634	NP_149105	Zinc finger CCHC-type and RNA binding motif 1
ASHG19A3A053120	351.99	386.168	160.397	69.8295	414.804	510.324	347.151	101.879	384.713	470.68	346.071	640.83	8.33349	8.63438	7.53181	6.51817	8.69427	8.79971	8.52007	7.48415	7.986	8.76313	8.26198	9.05607	coding	NM_005530	IDH3A	RefSeq_coding	2701	chr15	+	78441718	78462883		CTTTTTGACCATGCTGCAAGAATTGAGGCTGCGTGTTTTGCTACAATTAAGGACGGAAAG	3419	Hs.591110	GO:0051287|GO:0004449|GO:0000287|GO:0016491|GO:0016616|GO:0006103|GO:0006734|GO:0005975|GO:0006102|GO:0055114|GO:0006099|GO:0005759|GO:0005739	NP_005521	Isocitrate dehydrogenase 3 (NAD+) alpha
ASHG19A3A016566	401.198	287.36	537.22	230.417	466.567	283.899	403.327	290.694	1052.38	304.806	597.908	301.512	8.51842	8.18198	9.18279	8.32903	8.86635	7.93681	8.74808	8.97541	9.44574	8.12859	8.99081	7.89683	coding	NM_144711	KLHL23	RefSeq_coding	2211	chr2	+	170551000	170606438		AAAGTTCAGAGCTACAATTCCGATATCAACGAATGGAGCCTCATCACCTCCAGTCCACAT	493911	Hs.655150	GO:0016787|GO:0046872|GO:0033883|GO:0008152	NP_001186217	Phosphatase, orphan 2
ASHG19A3A022811	1018.64	1686.51	1006.46	1260.47	824.122	997.107	921.811	1505.3	1049.16	2647.29	761.672	970.817	9.85893	10.7705	10.081	10.6569	9.69036	9.78481	9.94658	11.1151	9.44013	11.2509	9.33847	9.70922	coding	NM_018029	FLJ10213	RefSeq_coding	1679	chr3	+	73110809	73112469		GGAGTGTTGGGTGGAATCATAGATCCATGCACTCCTAACATGAACTAATTCTCATTATTT	55096	Hs.658858	GO:0005515	NP_060499	Endogenous Borna-like N element-2
ASHG19A3A003761	84.7789	170.237	44.4683	66.9552	81.3792	126.303	87.2222	117.694	67.0832	304.874	56.119	166.79	6.29814	7.36927	5.79347	6.45129	6.37746	6.74976	6.52569	7.68884	5.58611	8.12922	5.86215	6.99225	coding	NM_001174156	SAMD8	RefSeq_coding	6782	chr10	+	76871392	76941880		ATGCTGAATTTCTTTGTCACCGAATATACACCAAGAAGCTGGAATTTCTTGCACACTTTA	142891	Hs.727615	GO:0003674|GO:0006629|GO:0006665|GO:0006686|GO:0016021|GO:0016020	NP_653261	Sterile alpha motif domain containing 8
ASHG19A3A011613	182.455	397.785	71.745	90.4964	96.4769	160.605	162.017	189.401	202.955	508.401	155.115	90.4612	7.39991	8.67591	6.42599	6.93093	6.61911	7.10168	7.42053	8.37753	7.09955	8.88447	7.19183	6.0476	coding	NM_000960	PTGIR	RefSeq_coding	2103	chr19	-	47123725	47128354		TTGTCTAAATATTTAGAAGGCGGAGAAGTTCCCAGAGGCTTCTGTACAGTCAGGTCTGCT	5739	Hs.458324	GO:0004930|GO:0005085|GO:0004872|GO:0007187|GO:0007596|GO:0007267|GO:0030168|GO:0005887|GO:0005886|GO:0005886	NP_000951	Prostaglandin I2 (prostacyclin) receptor (IP)
ASHG19A3A012877	74063.2	82111.4	85645.5	25170.6	160701	79385.2	76486.3	23149.7	91915.3	63643.9	113131	100819	16.4012	15.6801	16.7804	14.72	17.3237	16.0318	16.6044	14.4551	16.6259	15.6402	17.1008	16.3097	coding	NM_000146	FTL	RefSeq_coding	889	chr19	+	49468565	49470135	AF119897,AF119895,AF113686,	TTTGTGGTTAGCTCCTTCTTGCCAACCAACCATGAGCTCCCAGATTCGTCAGAATTATTC	2512	Hs.433670	GO:0008199|GO:0042802|GO:0005506|GO:0016491|GO:0005515|GO:0006879|GO:0016044|GO:0006826|GO:0055114|GO:0006892|GO:0005829|GO:0008043	NP_000137	Ferritin, light polypeptide
ASHG19A3A048471	67.1364	66.5031	40.7029	45.3916	82.8974	82.0189	51.6623	46.6743	77.4228	90.9387	59.6532	102.269	5.95436	5.9084	5.67472	5.84427	6.40361	6.12671	5.77867	6.31811	5.79162	6.36429	5.93928	6.24341	coding	NM_020782	KLHDC5	RefSeq_coding	6477	chr12	+	27933186	27955972		AGTTCTCTGCCTGTGAGTGTAAGGGAAAAATTTATGTCATTGGAGGATACACTACCAGAG	57542	Hs.505104		NP_065833	Kelch domain containing 5
ASHG19A3A005269	399.006	347.001	375.154	291.039	526.617	412.193	402.435	231.21	837.27	445.047	509.872	832.117	8.50997	8.46333	8.69285	8.66613	9.04477	8.4802	8.7437	8.65223	9.11636	8.68014	8.78093	9.45624	coding	NM_022443	MLF1	RefSeq_coding	2208	chr3	+	158288952	158324252		AGCAGTTTTGAGGATGACCCCTTCTTCTCTGAGTCCATTCTTGCACACCGAGAAAATATG	4291	Hs.85195	GO:0003677|GO:0005515|GO:0019904|GO:0007049|GO:0007050|GO:0030154|GO:0007275|GO:0002318|GO:0005737|GO:0005737|GO:0005634|GO:0005634	NP_071888	Myeloid leukemia factor 1
ASHG19A3A035649	2846.5	19988.8	2528.51	21826	2679.27	26640.2	2189.41	14729.8	3089	34721.8	2686.3	12567	11.3635	13.9779	11.4083	14.5157	11.4693	14.472	11.2664	13.9499	11.192	14.8356	11.171	13.357	coding	NM_018660	ZNF395	RefSeq_coding	4807	chr8	-	28203103	28243977		CCCATCTGTGAGTTTGTCTTATTGGCGCCTTTTTCCTCAGCTGTCTTCCAAGTATTATTT	55893	Hs.435535	GO:0003677|GO:0046872|GO:0008270|GO:0006355|GO:0005737|GO:0005622|GO:0005634	NP_061130	Zinc finger protein 395
ASHG19A3A054414	261.4	213.327	180.647	178.694	179.797	235.135	163.018	179.257	316.834	213.949	235.587	427.235	7.90103	7.7261	7.68688	7.95589	7.48574	7.65836	7.42844	8.30435	7.71899	7.61787	7.74929	8.43467	coding	NM_001145348	JMJD5	RefSeq_coding	2531	chr16	+	27215295	27233089		TTTATACTCTGCTATATGTGTGTCCGCTGCTTTTAGGCAACCAGCCGCTGCCCCTGGGCC	79831	Hs.145717	GO:0003682|GO:0051864|GO:0046872|GO:0016491|GO:0016702|GO:0000086|GO:0007049|GO:0016568|GO:0070544|GO:0055114|GO:0045893|GO:0005634	NP_079049	Jumonji domain containing 5
ASHG19A3A028702	690.366	1752.04	425.483	105.334	1072.01	1681.97	882.916	143.602	1460.11	1419.31	644.862	1181.51	9.30163	10.8279	8.86745	7.15865	10.0712	10.5267	9.88084	7.9882	9.94995	10.3926	9.09026	10.0158	coding	NM_003100	SNX2	RefSeq_coding	2091	chr5	+	122110749	122165800		GTGAACAAGGCTGCCGACGCTGTCAACAAAATGACAATCAAGATGAATGAATCGGATGCA	6643	Hs.713554	GO:0008289|GO:0035091|GO:0005515|GO:0008565|GO:0007154|GO:0006897|GO:0006886|GO:0005737|GO:0031901|GO:0005768|GO:0010008|GO:0016020	NP_003091	Sorting nexin 2
ASHG19A3A048594	510.635	591.187	351.236	336.799	514.476	639.413	404.601	263.834	522.766	579.638	454.885	602.653	8.86618	9.2679	8.60384	8.87225	9.00979	9.13535	8.75118	8.83724	8.44267	9.06643	8.62971	8.95275	coding	NM_005171	ATF1	RefSeq_coding	2439	chr12	+	51157818	51214906		TTCTGGAGTTTCTGCTGCTGTCACTTCTATGTCTGTTCCAACTCCCATCTATCAGACTAG	466	Hs.648565	GO:0010843|GO:0005515|GO:0032403|GO:0046982|GO:0003700|GO:0003705|GO:0002755|GO:0002755|GO:0002756|GO:0002756|GO:0008063|GO:0043623|GO:0045087|GO:0048011|GO:0045740|GO:0010976|GO:0045944|GO:0006355|GO:0032025|GO:0014070|GO:0051403|GO:0034130|GO:0034134|GO:0034138|GO:0034142|GO:0002224|GO:0006351|GO:0005654|GO:0005634|GO:0005667	NP_005162	Activating transcription factor 1
ASHG19A3A001604	61.7084	58.9013	61.4527	50.2163	49.2383	84.5158	43.3943	45.1497	75.8156	106.233	63.2725	69.7592	5.83176	5.72389	6.21679	6.00175	5.67956	6.1718	5.52315	6.26928	5.76112	6.59596	6.01817	5.64847	coding	NM_001083111	GNRH1	RefSeq_coding	1297	chr8	-	25276775	25282556		TTTTTGGCTCTCTGCCTCTAAACAGAATGAAGCCAATTCAAAAACTCCTAGCTGGCCTTA	2796	Hs.82963	GO:0005183|GO:0005179|GO:0006916|GO:0007267|GO:0007565|GO:0007275|GO:0008285|GO:0042698|GO:0010468|GO:0031960|GO:0045471|GO:0007165|GO:0005576|GO:0005576|GO:0005615|GO:0005625	NP_001076580	Gonadotropin-releasing hormone 1 (luteinizing-releasing hormone)
ASHG19A3A017012	139.661	146.128	111.895	141.005	122.206	152.28	103.425	115.392	108.496	197.304	147.387	229.797	7.01447	7.12132	7.04443	7.60253	6.94901	7.0256	6.77587	7.66272	6.25136	7.496	7.1275	7.48544	coding	NM_001005209	TMEM198	RefSeq_coding	2239	chr2	+	220408744	220415315		GGCACTGCCGGCCCTCGTCTGCATCATGTGCTGTTTGTTTGGAGTCGTCTACTGCTTCTT	130612	Hs.446664	GO:0016021|GO:0016020	NP_001005209	Transmembrane protein 198
ASHG19A3A001918	2414.62	416.595	1862.17	790.34	1123.54	1208.23	767.42	259.192	1196.7	587.444	2124.89	725.66	11.1093	8.73741	10.9473	10.0243	10.1463	10.0486	9.67107	8.81116	9.63603	9.08841	10.8244	9.25319	coding	NM_001114726	PRRT4	RefSeq_coding	2411	chr7	-	127990379	128001739		GGCCTGGGAGGCCCACGTGTACGGGCGATTACACCGTGGACTTCCGCCCGCCCTCCCCAA	401399	Hs.381096	GO:0016021|GO:0016020	NP_001167635	Proline-rich transmembrane protein 4
ASHG19A3A038180	1517.12	879.461	2025.3	1022.7	1696.77	1181.12	1176.04	914.942	2704.57	1288.35	2949.65	1690.52	10.4433	9.86534	11.0797	10.3653	10.7725	10.0229	10.3103	10.5049	10.9549	10.2558	11.328	10.5426	coding	NM_007101	SARDH	RefSeq_coding	3398	chr9	-	136528685	136605077		AGAACTTGGGCCACACTCCTTCCTTGCCCTCTTGAGCTCATTCGTCACCCTGTTGGGTGA	1757	Hs.198003	GO:0004047|GO:0050660|GO:0016491|GO:0008480|GO:0006546|GO:0055114|GO:0005737|GO:0005759|GO:0005739	NP_009032	Sarcosine dehydrogenase
ASHG19A3A023432	1838.1	519.047	1221.65	1187.72	1027.62	1285.76	1042.6	712.256	1467.73	981.752	1623.57	1043.81	10.7142	9.06909	10.3412	10.5782	10.0047	10.1333	10.1267	10.1867	9.9571	9.87475	10.4094	9.81634	coding	NM_172160	KCNAB1	RefSeq_coding	3715	chr3	+	155838336	156256927		AAAGACAAATCTCCCAAGAAAGCCTCAGAAAACGCTAAAGACAGCAGCCTTAGTCCCTCA	7881	Hs.654519	GO:0016491|GO:0015459|GO:0005244|GO:0005249|GO:0006811|GO:0055114|GO:0006813|GO:0055085|GO:0005737|GO:0016021	NP_751892	Potassium voltage-gated channel, shaker-related subfamily, beta member 1
ASHG19A3A043928	1134.16	881.837	737.307	895.101	836.823	1120.51	761.405	899.296	2041.7	1661.53	1584.9	1938.78	10.0167	9.8706	9.62528	10.178	9.71809	9.94707	9.65995	10.482	10.4974	10.6106	10.3742	10.739	coding	NM_003055	SLC18A3	RefSeq_coding	2440	chr10	+	50818346	50820765		TGTGTAGAGCCTGCATCTGTCTGTCCTTCCTTCCATTGCTCCCAGTGCCAAACTTGGGCC	6572	Hs.654374	GO:0042166|GO:0005277|GO:0015870|GO:0007269|GO:0007268|GO:0055085|GO:0030121|GO:0030122|GO:0030424|GO:0043679|GO:0060201|GO:0060201|GO:0031410|GO:0005887|GO:0005624|GO:0005886|GO:0008021	NP_003046	Solute carrier family 18 (vesicular acetylcholine), member 3
ASHG19A3A017989	2570.18	684.484	3039.62	2307.61	2786.39	1400.59	1480.06	698.108	2818.94	923.452	3276.38	1245.51	11.2034	9.49742	11.6875	11.4407	11.5332	10.2619	10.6541	10.1619	11.0282	9.78054	11.4827	10.0957	coding	NM_000915	OXT	RefSeq_coding	512	chr20	+	3052265	3053162		GCTTCCCCCATAGCCACCCCAGAAATGGTGAAAATAAAATAAAGCAGGTTTTTCTCCTCT	5020	Hs.113216	GO:0005179|GO:0005185|GO:0031855|GO:0005515|GO:0042756|GO:0042755|GO:0007204|GO:0007565|GO:0007625|GO:0007507|GO:0042538|GO:0060179|GO:0002125|GO:0042711|GO:0007613|GO:0045776|GO:0003077|GO:0060455|GO:0045777|GO:0045925|GO:0060450|GO:0003079|GO:0010701|GO:0045778|GO:0060406|GO:0032308|GO:0050806|GO:0051965|GO:0070474|GO:0044058|GO:0002027|GO:0051930|GO:0014823|GO:0001975|GO:0051591|GO:0042220|GO:…	NP_000906	Oxytocin, prepropeptide
ASHG19A3A038242	41206	58977.2	39406.6	66848.3	34633.4	57620.8	33696.2	56580.4	44986.6	64540.8	37088.9	48214.8	15.5314	15.254	15.6335	15.9378	15.5127	15.5663	15.3808	15.4522	15.5391	15.6619	15.4994	15.2255	coding	NM_003792	EDF1	RefSeq_coding	658	chr9	-	139756570	139760738		AGCTTGCGGGGGACCCTCCCCAGCCCATTCCTGCTGTCAAACAAACAAAACCTTGCAAAG	8721	Hs.174050	GO:0005516|GO:0004402|GO:0008168|GO:0005515|GO:0043565|GO:0003700|GO:0016563|GO:0003713|GO:0030154|GO:0045446|GO:0007275|GO:0043388|GO:0019216|GO:0006355|GO:0005737|GO:0005737|GO:0005622|GO:0005730|GO:0005634|GO:0005634|GO:0005634|GO:0005669	NP_694880	Endothelial differentiation-related factor 1
ASHG19A3A001971	69.5303	62.0554	83.2064	50.0301	86.9535	70.4108	75.1368	40.2216	129.394	78.864	90.7282	111.697	6.00398	5.80335	6.63335	5.99629	6.46784	5.89573	6.31342	6.10366	6.49048	6.15778	6.49127	6.38021	coding	NM_001126242	TP73	RefSeq_coding	2673	chr1	+	3607235	3650467		AGCAGCAGCAGCTCCTACAGAGGCCGCCCCGGGATGCTCAACAACCATGGCCACGCAGTG	7161	Hs.697294	GO:0003682|GO:0003684|GO:0003690|GO:0046872|GO:0002039|GO:0010843|GO:0005515|GO:0003700|GO:0016563|GO:0008134|GO:0016564|GO:0042771|GO:0006978|GO:0008630|GO:0007049|GO:0007050|GO:0034644|GO:0033326|GO:0048546|GO:0030900|GO:0021766|GO:0006954|GO:0006298|GO:0031571|GO:0043508|GO:0043524|GO:0000122|GO:0048666|GO:0045793|GO:0043193|GO:0010552|GO:0045893|GO:0009791|GO:0051262|GO:0001836|GO:0006974|GO:…	NP_005418	Tumor protein p73
ASHG19A3A002523	61.4392	88.2745	65.5802	43.0031	86.8414	98.6855	95.2049	43.1265	100.412	57.1109	56.1168	155.254	5.82495	6.34946	6.30565	5.75736	6.46558	6.39709	6.65184	6.20278	6.15046	5.68267	5.86206	6.87738	coding	NM_001142432	MORF4L2	RefSeq_coding	1998	chrX	-	102930427	102943086	NM_001142429,	tgtaaagtaccaggacagtgcatggcacatATACCTGCCTTTCTTTCTAGGTTGTATCTC	9643	Hs.326387	GO:0005515|GO:0006281|GO:0016568|GO:0001558|GO:0005730|GO:0005634	NP_036418	Mortality factor 4 like 2
ASHG19A3A031010	291.014	270.825	260.479	278.417	548.9	336.05	412.791	212.445	631.823	376.247	426.255	574.369	8.06175	8.08746	8.18966	8.60399	9.10621	8.18172	8.78124	8.53766	8.7049	8.43035	8.53766	8.88616	coding	NM_001040280	CD83	RefSeq_coding	2475	chr6	+	14117864	14137146		GAGATTGTCCTGCTGCTGGCTCTGGTTATTTTCTACTTAACACTCATCATTTTCACTTGT	9308	Hs.595133	GO:0006952|GO:0006959|GO:0032713|GO:0043372|GO:0032733|GO:0032743|GO:0014070|GO:0007165|GO:0009897|GO:0005887|GO:0005886	NP_004224	CD83 molecule
ASHG19A3A026308	188.914	2934.16	75.8074	381.773	199.533	1338.05	199.642	337.012	158.294	2071.94	179.864	2338.65	7.44975	11.5499	6.50096	9.04825	7.63501	10.1944	7.71899	9.17912	6.75609	10.9236	7.38248	10.9941	coding	NM_003864	SAP30	RefSeq_coding	1126	chr4	+	174292092	174298682		AGAAAAGGGAGTGATGATGATGGAGGTGATTCACCTGTTCAAGATATTGATACCCCAGAG	8819	Hs.591715	GO:0003677|GO:0046872|GO:0005515|GO:0003714|GO:0000122|GO:0000118|GO:0005634	NP_003855	Sin3A-associated protein, 30kDa
ASHG19A3A006350	383.01	134.32	261.928	217.363	262.245	262.248	258.962	121.382	435.469	244.152	474.169	331.659	8.44972	6.98911	8.19574	8.24467	8.02934	7.82466	8.09312	7.73406	8.16676	7.81002	8.6839	8.04097	coding	NM_173087	CAPN3	RefSeq_coding	3040	chr15	+	42651697	42704515		CTCCCTCATGGGCTGCTCCATTGATACAATCATTCCGGTTCAGTATGAGACAAGAATGGC	825	Hs.143261	GO:0005509|GO:0004198|GO:0008234|GO:0008233|GO:0004871|GO:0007517|GO:0006508|GO:0051592|GO:0042493|GO:0045214|GO:0007165|GO:0005737|GO:0005622|GO:0005634	NP_775113	Calpain 3, (p94)
ASHG19A3A031366	718.997	1103.18	555.352	899.198	421.624	1018.84	478.647	720.983	654.053	1301.57	537.655	369.563	9.35462	10.1985	9.23014	10.1856	8.71848	9.8176	8.99066	10.2056	8.75538	10.2724	8.84969	8.20397	coding	NM_003782	B3GALT4	RefSeq_coding	1704	chr6	+	33244916	33246604		ATCTGTTTCCTTATACCAGATCCTCAGTCTCACTAAAGACAGCGATATGGGAGACACCCA	8705	Hs.534375	GO:0008499|GO:0008378|GO:0047915|GO:0016757|GO:0006486|GO:0005794|GO:0000139|GO:0016021|GO:0016020	NP_003773	UDP-Gal:betaGlcNAc beta 1,3-galactosyltransferase, polypeptide 4
ASHG19A3A003157	293.055	337.558	285.8	298.155	317.62	346.248	400.953	230.779	739.428	379.552	509.784	569.081	8.07205	8.42029	8.32226	8.70101	8.31098	8.22135	8.7379	8.64938	8.93841	8.44419	8.78069	8.87052	coding	NM_001163286	EWSR1	RefSeq_coding	2511	chr22	+	29663997	29696514		AGCCAGCAGCCACTGCACCTACAAGCTATTCCTCTACACAGCCGACTAGTTATGATCAGA	2130	Hs.374477	GO:0003723|GO:0005516|GO:0046872|GO:0000166|GO:0005515|GO:0008270|GO:0005737|GO:0005622|GO:0005634|GO:0005886	NP_053733	Ewing sarcoma breakpoint region 1
CUST_16_PI418767722	2444.1	4243.88	2240.22	3854.14	2032.55	3227.9	2264.67	3657.43	1470.25	4333.66	2403.5	5461.08	11.1283	12.0437	11.2227	12.0896	11.0632	11.4634	11.3189	12.2543	9.96258	11.9914	11.0113	12.1764	coding	NM_001536	PRMT1	RefSeq_coding	1386	chr19	+	50180495	50191704	NR_033397,NM_198319,NM_198318,	GGCACATCGTGACTGTGTTTTTCATAACTTATGTTTTTATATGGTTGCATTTACGCCAAT	3276	Hs.20521	GO:0008170|GO:0044020|GO:0008168|GO:0005515|GO:0008276|GO:0016740|GO:0007166|GO:0043985|GO:0001701|GO:0031175|GO:0018216|GO:0006479|GO:0005737|GO:0005829|GO:0005634	NP_938074	Protein arginine methyltransferase 1
ASHG19A3A019022	74.4708	60.7594	61.1593	44.3155	44.7901	89.8857	63.1406	51.3146	68.056	64.4523	62.1622	46.9812	6.10912	5.77234	6.21197	5.80379	5.55548	6.26071	6.05866	6.46071	5.60622	5.86318	5.9957	5.02749	coding	NM_058180	C21orf58	RefSeq_coding	2991	chr21	-	47721049	47743785		ATTTAATAACTAGGGACACCTGTGTCCACAGCTGTGGCACAGACTCCCACTAAAGAAGTA	54058	Hs.236572		NP_478060	Chromosome 21 open reading frame 58
ASHG19A3A014616	3648.52	4526.24	4143.18	6211.69	3817.66	4931.83	3599.73	5200.01	4141.36	6560.76	4280.36	1615.48	11.7417	12.1274	12.1418	12.7454	12.0318	12.0736	12.0347	12.7132	11.6451	12.5786	11.8917	10.4823	coding	NM_007033	RER1	RefSeq_coding	3118	chr1	+	2323213	2336881		CAAGCCTGATGGGGCTGTTTTCTCACAATATAAACGAATAAAGTGTCTTCTGGCCTACTT	11079	Hs.591454	GO:0003674|GO:0006890|GO:0005794|GO:0000139|GO:0030173|GO:0016021|GO:0016020	NP_008964	RER1 retention in endoplasmic reticulum 1 homolog (S. cerevisiae)
ASHG19A3A039854	882.937	334.434	689.268	432.13	474.847	544.782	436.602	227.969	635.818	290.971	583.388	402.994	9.6577	8.40533	9.52903	9.21782	8.89429	8.89087	8.85799	8.63297	8.71502	8.06409	8.96289	8.34765	coding	NM_207672	GRIPAP1	RefSeq_coding	3260	chrX	-	48833334	48858675		CCTAGATGAGATTAACCTGTTTTTTATTCAACTGTTGTCTCTACCTTCCCAATTTGATCA	56850	Hs.109929	GO:0003674|GO:0008150|GO:0005575|GO:0005769	NP_997555	GRIP1 associated protein 1
ASHG19A3A047634	3591	848.218	2576.46	1437.4	1806.01	1752.52	1503.9	701.709	2656.3	1081.28	2382.71	1587.47	11.7145	9.81219	11.4377	10.8244	10.8753	10.5931	10.6821	10.1701	10.9296	10.0021	11.0004	10.4571	coding	NM_001173467	SP7	RefSeq_coding	3010	chr12	-	53720361	53730004		TCTCCCTGCCAGACCTCCAGAGAGGAGAGACTCGGGACAGCCAGCCCCAGGTTCCCCCAG	121340	Hs.209402	GO:0003677|GO:0046872|GO:0030528|GO:0008270|GO:0001649|GO:0006357|GO:0005622|GO:0005634	NP_690599	Sp7 transcription factor
ASHG19A3A009442	549.196	848.168	290.215	204.37	657.735	977.648	486.458	114.256	446.164	463.822	461.908	448.212	8.97053	9.81192	8.33789	8.15271	9.36911	9.75671	9.0135	7.64919	8.20493	8.743	8.64911	8.5163	coding	NM_032351	MRPL45	RefSeq_coding	1713	chr17	+	36452997	36479100	uc002ilp.1,	AAAGCAGGATTGGTTATTCCTCCAGAAAAATCGGACCGTTCCATACATCTGGCCTGTACA	84311	Hs.462913	GO:0015450|GO:0003735|GO:0006886|GO:0006412|GO:0005744|GO:0005739|GO:0005739|GO:0005840	NP_115727	Mitochondrial ribosomal protein L45
ASHG19A3A003516	105.028	76.795	98.088	74.4559	84.7156	80.1925	91.5103	66.1484	134.152	53.5538	118.111	135.019	6.60187	6.12754	6.85864	6.6186	6.43067	6.09082	6.59614	6.83959	6.5355	5.59012	6.8362	6.67339	coding	NM_001170687	MIB2	RefSeq_coding	3308	chr1	+	1550794	1565990	NM_001170689,	GGCGGGCGACTGGACGGCCGGACAGGTCCCGAGCAGCCCCGCCCAACATGGACCCAGACC	142678	Hs.135805	GO:0003779|GO:0016874|GO:0046872|GO:0004871|GO:0004842|GO:0008270|GO:0007219|GO:0043123|GO:0007165|GO:0005737|GO:0005768	NP_543151	Mindbomb homolog 2 (Drosophila)
ASHG19A3A035391	4267	2544.09	5308.22	5570.19	9287.12	3217.08	4131.6	2738.61	10125.7	3192.56	8446.22	4748.29	11.9732	11.357	12.5007	12.5977	13.4165	11.4578	12.2589	11.8766	13.05	11.5316	12.9078	11.9823	coding	NM_001427	EN2	RefSeq_coding	3405	chr7	+	155250823	155257520		ACCCCCACCCCCGCATTTTTGTGTGTTGAAATTCTTGAAGGTTACATTAAATAAAACAAA	2020	Hs.134989	GO:0043565|GO:0003700|GO:0030528|GO:0030902|GO:0030901|GO:0007275|GO:0048666|GO:0045944|GO:0006355|GO:0005634	NP_001418	Engrailed homeobox 2
ASHG19A3A018429	1056.34	1767.02	885.671	685.08	1450.6	2152.19	1152.09	864.35	1232.23	1810.84	1151.75	3248.25	9.91875	10.8438	9.89404	9.82248	10.5352	10.8781	10.2805	10.4296	9.68162	10.7301	9.89647	11.4569	coding	NM_018683	RNF114	RefSeq_coding	2478	chr20	+	48552913	48570420		ACCAGAATTACATCATGGAAGGTGTGAAGGCCACCATTAAGGATGCATCTCTTCAGCCAA	55905	Hs.144949	GO:0046872|GO:0008270|GO:0030154|GO:0007275|GO:0007283|GO:0005622	NP_061153	Ring finger protein 114
ASHG19A3A007899	439.122	973.438	326.846	360.976	519.049	726.809	519.002	470.112	838.251	984.705	523.61	691.853	8.64345	10.0229	8.50173	8.97402	9.02668	9.32155	9.10351	9.62168	9.11865	9.87791	8.81368	9.17844	coding	NM_004853	STX8	RefSeq_coding	988	chr17	-	9153788	9479275		AACTCGAGAGAGACTACTTCTGGCATCCTTTAAGAATGAGGGTGCCGAACCAGATCTAAT	9482	Hs.431109	GO:0031625|GO:0006810|GO:0005783|GO:0005887|GO:0016020	NP_004844	Syntaxin 8
ASHG19A3A037910	91.5681	78.5013	98.3252	49.1977	92.1268	91.0323	105.935	52.5384	148.825	75.9383	100.074	104.896	6.4081	6.16115	6.86253	5.96882	6.55175	6.28089	6.81075	6.49833	6.67318	6.10237	6.6227	6.28259	coding	NM_001163788	ROD1	RefSeq_coding	7237	chr9	-	114980714	115095944		ATAATAATGACAAAAGCAGAGACTTCACTCGCTTAGACCTTCCTACTGGTGATGGCCAGC	9991	Hs.269988	GO:0003723|GO:0000166|GO:0009653|GO:0006397|GO:0045595|GO:0005634	NP_005147	ROD1 regulator of differentiation 1 (S. pombe)
ASHG19A3A004343	185.787	345.666	210.034	318.898	176.327	261.41	240.934	213.622	335.285	311.927	152.564	257.322	7.42273	8.45838	7.89844	8.80037	7.45785	7.82055	7.99039	8.54405	7.79493	8.16365	7.16972	7.66193	coding	NM_004875	POLR1C	RefSeq_coding	1138	chr6	+	43484790	43497114		GCCCGGGTTCGAGATCATTATATCTGTAAGAAAGATTTGCTGGCTGCGGTGGCTCACACC	9533	Hs.727715	GO:0003677|GO:0003899|GO:0005515|GO:0046983|GO:0006363|GO:0006362|GO:0006360|GO:0006361|GO:0005736|GO:0005654|GO:0005654|GO:0005634	NP_976035	Polymerase (RNA) I polypeptide C, 30kDa
ASHG19A3A002592	163.513	133.468	145.758	93.8076	143.602	134.186	157.848	67.7939	323.706	120.005	189.303	176.773	7.24409	6.97958	7.40625	6.98559	7.16765	6.83885	7.38453	6.87585	7.74742	6.77093	7.45001	7.08028	coding	NM_001144943	RAB34	RefSeq_coding	1333	chr17	-	27041298	27045286	NM_001142625,NM_001142624,	GATTCCCCATCACCAATTCGGCTGGGGCGCCCTGCAAGGCCGCAGGCAGGATGAACATTC	83871	Hs.301853	GO:0005525|GO:0003924|GO:0019001|GO:0000166|GO:0006897|GO:0015031|GO:0007264|GO:0005794|GO:0005737|GO:0005769|GO:0001726	NP_114140	RAB34, member RAS oncogene family
ASHG19A3A005064	108.912	131.705	104.758	72.9033	91.301	94.927	87.1203	79.1335	150.65	105.939	85.785	111.202	6.65711	6.96239	6.94891	6.58813	6.53947	6.33903	6.52407	7.10538	6.6917	6.5923	6.41545	6.37211	coding	NM_018904	PCDHA13	RefSeq_coding	5260	chr5	+	140261853	140391929		AGGAGGACTCAGAATGCTTGAAAGAGCCACGACAGCCCAACCCTGACTGGCGTTACTCTG	56117	Hs.199343			Protocadherin alpha cluster, complex locus
ASHG19A3A027586	202.321	277.871	151.644	212.099	178.606	499.366	138.175	164.574	197.251	299.734	170.132	678.598	7.54582	8.12262	7.45894	8.21195	7.47544	8.77329	7.19262	8.18226	7.06374	8.10552	7.31013	9.14646	coding	NM_001025070	RPS14	RefSeq_coding	787	chr5	-	149823793	149829319		GGATTGAGTTCGTTCCTGGTCTCAGAAGGCCCGTTTTGCTTTCAGGGAGGAGCTTGTGAA	6208	Hs.725969	GO:0003723|GO:0048027|GO:0005515|GO:0003735|GO:0045182|GO:0044267|GO:0031018|GO:0030218|GO:0010467|GO:0030490|GO:0000122|GO:0006417|GO:0000028|GO:0000028|GO:0006412|GO:0006412|GO:0006412|GO:0006414|GO:0006415|GO:0019058|GO:0016032|GO:0019083|GO:0005829|GO:0005829|GO:0022627|GO:0005622|GO:0005730|GO:0005840	NP_005608	Ribosomal protein S14
ASHG19A3A002363	219.558	407.282	116.451	40.57	273.714	486.88	245.158	46.0987	249.548	442.136	170.719	194.163	7.65284	8.70779	7.09793	5.67149	8.08902	8.7333	8.01691	6.29941	7.38359	8.67069	7.31528	7.228	coding	NM_001135822	FDPS	RefSeq_coding	1357	chr1	+	155278538	155290457		AGCAGGAATCCGTATCTGGGAACAGAATGAACGGAGACCAGAATTCAGATGTTTATGCCC	2224	Hs.335918	GO:0004161|GO:0004337|GO:0046872|GO:0016740|GO:0006695|GO:0044419|GO:0008299|GO:0005737|GO:0005829|GO:0005730|GO:0005634	NP_001995	Farnesyl diphosphate synthase
ASHG19A3A023863	108.886	107.216	107.875	99.8522	110.221	163.63	91.6659	79.9108	124.603	108.61	102.434	151.522	6.65686	6.64312	6.99107	7.08206	6.79988	7.12699	6.59947	7.12021	6.43938	6.62723	6.65129	6.84202	coding	NM_003703	NOP14	RefSeq_coding	2939	chr4	-	2939663	2965118		TTTATTTGAAAATCACTGGGCTGCTATTTCCAACTTCCGACTTCTGGCACCCAGTGGTGA	8602	Hs.627133	GO:0030515|GO:0000480|GO:0000447|GO:0000472|GO:0000462|GO:0006364|GO:0042274|GO:0030686|GO:0030692|GO:0005739|GO:0005730|GO:0005634|GO:0032040	NP_003694	NOP14 nucleolar protein homolog (yeast)
ASHG19A3A035658	160.466	149.315	169.048	135.827	182.46	232.523	149.993	101.062	185.184	165.154	166.804	212.691	7.21479	7.15998	7.59844	7.54516	7.50576	7.6409	7.30408	7.47248	6.97482	7.23129	7.28455	7.36844	coding	NM_057158	DUSP4	RefSeq_coding	3404	chr8	-	29193616	29206322		TGGAGTCTGGATTTGTTTTGTTGTGTTTTGCTTTCCTTCCTGGAAGAAATCCCGAGGGGA	1846	Hs.417962	GO:0017017|GO:0016787|GO:0004725|GO:0008330|GO:0000165|GO:0002755|GO:0002755|GO:0002756|GO:0002756|GO:0008063|GO:0001706|GO:0000188|GO:0045087|GO:0048011|GO:0006470|GO:0051403|GO:0034130|GO:0034134|GO:0034138|GO:0034142|GO:0002224|GO:0005654|GO:0005634	NP_476499	Dual specificity phosphatase 4
ASHG19A3A040556	46.357	103.675	48.5896	93.88	62.4163	59.4583	33.7542	48.052	52.0218	71.1137	47.91	112.515	5.42537	6.59469	5.91559	6.98643	5.99427	5.64323	5.15609	6.36249	5.23647	6.01111	5.64821	6.39267	coding	NM_001135740	PNCK	RefSeq_coding	1522	chrX	-	152935189	152938743		GTAGGCCTGGGATGTGGAGGCGTGTATGCGGTGGCCTCGCTGGGAGGCGTCCGTCTGGGG	139728	Hs.436667	GO:0005524|GO:0005516|GO:0004683|GO:0000166|GO:0016740|GO:0006468|GO:0005737|GO:0005634	NP_001129212	Pregnancy up-regulated non-ubiquitously expressed CaM kinase
ASHG19A3A011444	82396.7	145326	73164.7	96165.8	61513.9	100864	46230.7	111686	57364.5	125563	69447.8	131547	16.5728	16.5679	16.5555	16.4156	16.4439	16.3656	15.8531	16.3838	15.9505	16.6121	16.4935	16.6609	coding	NM_001020	RPS16	RefSeq_coding	603	chr19	-	39923848	39926618		CGATAAGCCCATCGTGACTCAAAACTCACTTGTATAATAAACAGTTTTTGAGGGATTTTA	6217	Hs.397609	GO:0003723|GO:0005515|GO:0003735|GO:0044267|GO:0031018|GO:0010467|GO:0006364|GO:0042274|GO:0006412|GO:0006412|GO:0006412|GO:0006414|GO:0006415|GO:0019058|GO:0016032|GO:0019083|GO:0005829|GO:0005829|GO:0022627|GO:0022627|GO:0005622|GO:0015935	NP_001011	Ribosomal protein S16
ASHG19A3A053825	847.6	1879.16	602.129	2016.74	976.518	699.382	569.144	15568.7	212.302	1760.42	650.223	5921.83	9.59713	10.9478	9.33652	11.2629	9.93405	9.27047	9.2345	14.0001	7.16972	10.6944	9.10382	12.2878	coding	NM_001128850	RRAD	RefSeq_coding	1476	chr16	-	66955581	66959439		GCGGTAGCTATTTGTTTACATGCAGATTTTTGTAATAAAGGCTATTTCCTGATAGTCATG	6236	Hs.1027	GO:0005525|GO:0003924|GO:0005516|GO:0000166|GO:0005515|GO:0006184|GO:0030308|GO:0007165|GO:0007264|GO:0005886	NP_004156	Ras-related associated with diabetes
ASHG19A3A011436	193.596	133.098	158.487	191.916	146.735	181.499	158.287	177.562	488.107	259.715	327.604	298.685	7.48544	6.97596	7.51662	8.06104	7.19588	7.28039	7.38726	8.28805	8.33071	7.90387	8.18448	7.88369	coding	NM_001080468	SYCN	RefSeq_coding	482	chr19	-	39693561	39694906		AGCTGATGCATTGCTGGTCTCTCATCTGCAGCTTCCACAGAGTGCCAAGCCCCTCACTCA	342898	Hs.124123	GO:0006887|GO:0031410|GO:0016020|GO:0030667|GO:0030658	NP_001073937	Syncollin
ASHG19A3A028824	425.945	222.339	447.129	253.811	416.349	273.852	380.15	283.274	1087.11	351.025	708.044	427.176	8.60039	7.78928	8.94161	8.47244	8.70026	7.88339	8.66	8.93841	9.49789	8.33386	9.2337	8.43396	coding	NM_178019	CATSPER3	RefSeq_coding	1367	chr5	+	134303595	134347397		TATGTTTTTACCCTATGCCCTCCGCCAGCTCATGGGCAAACAGTTCACTTACCTGTATAT	347732	Hs.631804	GO:0005227|GO:0005262|GO:0005244|GO:0030154|GO:0001539|GO:0006811|GO:0007275|GO:0006814|GO:0030317|GO:0007283|GO:0055085|GO:0001669|GO:0005929|GO:0005783|GO:0020017|GO:0019861|GO:0016021|GO:0005886	NP_821138	Cation channel, sperm associated 3
ASHG19A3A022684	96.6595	48.8049	83.3877	76.699	83.0806	76.8956	83.351	67.0496	174.985	54.1952	113.477	91.949	6.48437	5.43319	6.63697	6.66563	6.40697	6.02914	6.4587	6.85956	6.899	5.60566	6.78702	6.07379	coding	NM_206825	GNL3	RefSeq_coding	2159	chr3	+	52719935	52728508		GTCTGGAAGTTGCTGCAGCCACCACGACGCTCTTCTACGGCTACGGCTTTGTCTCTGCTG	26354	Hs.313544	GO:0005525|GO:0000166|GO:0005515|GO:0042127|GO:0005622|GO:0005730|GO:0005634	NP_996562	Guanine nucleotide binding protein-like 3 (nucleolar)
ASHG19A3A006601	273.362	320.228	186.754	79.1391	351.668	452.744	323.574	76.5907	380.028	192.205	292.181	382.011	7.9675	8.33462	7.72964	6.71816	8.45496	8.61876	8.40962	7.05687	7.97212	7.45453	8.03153	8.26065	coding	NM_181893	UBE2D3	RefSeq_coding	2006	chr4	-	103717133	103790003		ATGCTTTCTAACCGAAAGTGCCTTTCAAAAGAACTTAGTGATTTGGCCCGTGACCCTCCA	7323	Hs.518773	GO:0005524|GO:0016881|GO:0016874|GO:0000166|GO:0005515|GO:0004842|GO:0030509|GO:0006281|GO:0006915|GO:0032480|GO:0043687|GO:0043161|GO:0070979|GO:0070936|GO:0006464|GO:0006513|GO:0000209|GO:0016567|GO:0016567|GO:0007179|GO:0006511|GO:0005768|GO:0010008|GO:0005886	NP_871622	Ubiquitin-conjugating enzyme E2D 3 (UBC4/5 homolog, yeast)
ASHG19A3A020088	114.103	69.3084	70.0479	79.7037	76.7077	96.9359	68.0364	61.947	172.824	112.344	140.894	101.648	6.72502	5.97343	6.39811	6.72939	6.29193	6.37127	6.17259	6.74371	6.88106	6.67479	7.06349	6.23336	coding	NM_001178010	CDC45	RefSeq_coding	2036	chr22	+	19467413	19508134		AGAAGAGCTCCAGGTTGTTCGCCGGTCCCATGAGTGACAGGACAGCCCCAAGGTCTCCCA	8318	Hs.474217	GO:0005515|GO:0006260|GO:0000076|GO:0006271|GO:0006270|GO:0000082|GO:0000216|GO:0000084|GO:0000075|GO:0000278|GO:0000083|GO:0005813|GO:0005737|GO:0005654|GO:0005654|GO:0005634	NP_003495	Cell division cycle 45 homolog (S. cerevisiae)
ASHG19A3A020773	855.055	202.845	627.517	418.301	354.477	368.611	392.001	256.628	1319.37	433.056	957.78	605.072	9.61096	7.65135	9.39988	9.1732	8.46791	8.31653	8.70824	8.79971	9.78794	8.64108	9.65421	8.95971	coding	NM_005677	COLQ	RefSeq_coding	3007	chr3	-	15491640	15563258	NM_080539,	ATTTATCTTCAGCTTTTCTTCCTCTCTATCGTGTCTCAGCCGACTTTCATCAACAGCGTT	8292	Hs.146735	GO:0001507|GO:0008105|GO:0042135|GO:0005605|GO:0030054|GO:0005615|GO:0045202	NP_536800	Collagen-like tail subunit (single strand of homotrimer) of asymmetric acetylcholinesterase
ASHG19A3A053948	240.303	157.724	181.788	157.903	205.697	233.652	172.407	173.189	405.008	232.094	274.08	334.305	7.77494	7.24313	7.69511	7.77045	7.67824	7.64746	7.51217	8.24706	8.06191	7.73521	7.94701	8.05188	coding	NM_001170716	BCAR1	RefSeq_coding	3195	chr16	-	75262928	75300707		ACCCACCGTCCCCAGGAAGCAGAACAGAGGGGTCGGACCCCTGGTCCTTCCTTTGAGTGG	9564	Hs.479747	GO:0017124|GO:0005515|GO:0019901|GO:0019903|GO:0004871|GO:0050853|GO:0007186|GO:0007186|GO:0050852|GO:0007015|GO:0050851|GO:0007596|GO:0007155|GO:0051301|GO:0016477|GO:0008283|GO:0007173|GO:0008286|GO:0007229|GO:0048011|GO:0048008|GO:0030335|GO:0042981|GO:0001558|GO:0007165|GO:0030054|GO:0005737|GO:0005829|GO:0005829|GO:0005925|GO:0005624|GO:0001726	NP_055382	Breast cancer anti-estrogen resistance 1
ASHG19A3A041711	101.213	68.0518	109.678	78.1695	81.042	98.2912	107.318	76.2762	241.395	104.476	149.66	149.15	6.54863	5.94489	7.0165	6.69904	6.37211	6.39216	6.82792	7.05049	7.34115	6.57536	7.14761	6.81696	coding	NM_001178113	ZNF185	RefSeq_coding	3897	chrX	+	152086408	152142024		GGCCAAATCTGGAGGCAGGAGGGAGCCTGCAGGTAGACACATGGAACCTTCTCCTCTCTA	7739	Hs.16622	GO:0046872|GO:0008270|GO:0030054|GO:0005737|GO:0005856|GO:0005925	NP_009081	Zinc finger protein 185 (LIM domain)
ASHG19A3A008821	1549.83	16343.1	1513.98	8848.95	2643.09	19344.7	2714.09	18784.8	2737.65	14219.7	2183.69	1647.55	10.4718	13.7723	10.6374	13.2219	11.4453	14.0271	11.5945	14.2454	10.9741	13.6816	10.8692	10.5122	coding	NM_134268	CYGB	RefSeq_coding	1951	chr17	-	74523439	74533782		CTAGTTTCTGATGTTTGTAACCAGACCCAGCTGTGTCATTAAACAGACCCGTTCTTGCTG	114757	Hs.95120	GO:0020037|GO:0046872|GO:0019825|GO:0005344|GO:0004601|GO:0015671|GO:0006979|GO:0006810|GO:0005737	NP_599030	Cytoglobin
ASHG19A3A051246	485.871	185.251	471.826	223.544	551.371	286.45	505.147	288.31	1497.03	403.727	945.422	499.183	8.79094	7.49629	9.01275	8.28661	9.11313	7.9506	9.07124	8.96232	9.9906	8.53277	9.63669	8.66995	coding	NM_006683	EDDM3A	RefSeq_coding	879	chr14	+	21214098	21216538		GATATTGACTCTCTTTATACCTACCCAAGCTGAACGACCCTCCTTTTCTTAAATAAAATA	10876	Hs.304757	GO:0007321|GO:0005576|GO:0005615	NP_006674	Epididymal protein 3A
ASHG19A3A021219	5375.29	5222.28	3972.5	1557.01	7338.56	5720.29	5487.47	3269.16	7588.58	7164.16	5666.92	5979.33	12.3183	12.3272	12.0782	10.927	13.0412	12.2904	12.6865	12.104	12.5893	12.7041	12.3053	12.3025	coding	NM_025075	THOC7	RefSeq_coding	1028	chr3	-	63819546	63849597		AGCCATAGACAGGCTAATTGCCCACCACTCCCAGGAATATTGAAATAGCTACATGACCAT	80145	Hs.288151	GO:0003723|GO:0005515|GO:0008380|GO:0046784|GO:0006406|GO:0006397|GO:0006810|GO:0000347|GO:0000445|GO:0005737|GO:0005634|GO:0000346	NP_079351	THO complex 7 homolog (Drosophila)
ASHG19A3A047524	272.447	283.108	253.719	266.096	323.413	350.714	281.294	258.189	613.851	403.813	520.328	618.883	7.96127	8.16106	8.15006	8.54244	8.33829	8.24334	8.21223	8.80593	8.66585	8.53351	8.8064	8.9951	coding	NM_015401	HDAC7	RefSeq_coding	4301	chr12	-	48176508	48213763		GCCTTGCCGACAGTGTCCTTGCTGCCCGCAATCACTCTGGGGCTGCCCGCCCCTGCCAGG	51564	Hs.200063	GO:0032041|GO:0046969|GO:0046970|GO:0034739|GO:0016787|GO:0005080|GO:0070491|GO:0016568|GO:0032703|GO:0045668|GO:0090050|GO:0005737|GO:0000118|GO:0005634	NP_056216	Histone deacetylase 7
ASHG19A3A048724	121.662	112.432	150.111	121.235	113.424	152.334	227.659	93.6788	235.533	118.236	158.728	171.827	6.8173	6.71631	7.44512	7.37185	6.84499	7.02673	7.90893	7.35876	7.30752	6.74825	7.21882	7.03709	coding	NM_001135195	SLC39A5	RefSeq_coding	1985	chr12	+	56624500	56631627		TATGTGACGTGGCCTCCGATCCACCTGGACACCTGGAGGCTAAGCCTGGATTCCCCCTTC	283375	Hs.591018	GO:0046873|GO:0006811|GO:0055085|GO:0006829|GO:0016323|GO:0016021|GO:0005886	NP_775867	Solute carrier family 39 (metal ion transporter), member 5
ASHG19A3A031662	126.998	78.1225	57.7244	29.6573	102.146	100.142	102.528	27.7437	140.736	145.95	79.8644	211.925	6.87902	6.15283	6.14135	5.17119	6.70157	6.4208	6.76246	5.55982	6.5964	7.04926	6.31913	7.36249	coding	NM_004282	BAG2	RefSeq_coding	2068	chr6	+	57037103	57050010		ATCCTTCTGGAAATGATCCACAGTATCCAAAATAGCCAGGACATGAGGCAGATCAGTGAC	9532	Hs.729098	GO:0005515|GO:0006915|GO:0006457|GO:0019538	NP_004273	BCL2-associated athanogene 2
ASHG19A3A001785	366.51	413.206	382.607	252.805	380.434	448.267	350.427	160.348	405.38	302.769	406.409	756.654	8.39139	8.72929	8.71848	8.46664	8.56745	8.60257	8.53525	8.14507	8.06334	8.11917	8.47342	9.30626	coding	NM_001100590	KIAA0232	RefSeq_coding	7789	chr4	+	6784458	6885897		ggccgccgcgccgcccggcAGCCTCGGCAGGTTCTGCCGGAGACTTCCATTTGGCCTCAA	9778	Hs.79276	GO:0005524|GO:0000166	NP_055558	KIAA0232
ASHG19A3A002245	2477.8	1352.03	4535.16	1879.62	3024.99	1745.75	3327.04	2003.32	6885.03	1834.52	5529.71	2584.43	11.1473	10.4766	12.2732	11.1732	11.6611	10.5872	11.9118	11.4905	12.4597	10.7502	12.2656	11.1487	coding	NM_001134388	ZDHHC4	RefSeq_coding	1479	chr7	+	6617064	6628609		AGGCGCCGGAGCCCAGCGGCTGGCGGGCCGCCGTCCCACCCCCACCTCGCCCGAGTCCGG	55146	Hs.5268	GO:0008415|GO:0046872|GO:0016740|GO:0008270|GO:0016021|GO:0016020	NP_060576	Zinc finger, DHHC-type containing 4
ASHG19A3A037182	189.912	94.2138	139.279	136.321	149.715	174.435	129.914	84.0295	239.384	94.324	153.478	143.933	7.4588	6.44803	7.34711	7.55362	7.22534	7.224	7.10202	7.19564	7.33092	6.41892	7.17747	6.76535	coding	NM_002172	IFNA14	RefSeq_coding	778	chr9	-	21239201	21239978		AGACTCACTTCTCCTATAACCACCACAAGTTGAATCAAAATTTTCAAATGTTTTCAGGAG	3448	Hs.93907	GO:0005125|GO:0005126|GO:0007596|GO:0019221|GO:0006952|GO:0060338|GO:0009615|GO:0060337|GO:0005576|GO:0005576|GO:0005615	NP_002163	Interferon, alpha 14
ASHG19A3A019986	244.155	257.14	228.816	231.394	241.105	263.098	215.115	191.826	454.011	284.213	360.744	373.206	7.79924	8.0105	8.01436	8.33691	7.90931	7.8288	7.82361	8.39696	8.22799	8.02985	8.31832	8.22413	coding	NM_178548	TFAP2E	RefSeq_coding	2189	chr1	+	36038970	36060925		AAATTGATAAATCAGAGGTGCTACTGAGGAGTTGGTGCCCCTCATTCCAGAATCTCCTAC	339488	Hs.567844	GO:0003677|GO:0046982|GO:0042803|GO:0003700|GO:0045944|GO:0006355|GO:0005634	NP_848643	Transcription factor AP-2 epsilon (activating enhancer binding protein 2 epsilon)
ASHG19A3A033162	162.592	79.609	140.183	87.2458	233.142	147.695	137.502	68.5176	189.7	98.7143	133.908	108.075	7.23501	6.18353	7.35524	6.86998	7.86101	6.97859	7.18547	6.89084	7.00708	6.49311	7.00227	6.32857	coding	NM_017654	SAMD9	RefSeq_coding	6853	chr7	-	92728831	92747322		TGTGATCTCCTACATCACCCTGGAAGTGAGACTTCTTCGGTTTCTTCTAGAGTCAGTTTG	54809	Hs.65641	GO:0005737	NP_060124	Sterile alpha motif domain containing 9
ASHG19A3A043193	226.729	195.597	137.543	54.5497	306.533	458.166	176.328	44.1393	249.735	298.975	236.926	255.322	7.7005	7.59019	7.33111	6.1323	8.2567	8.63863	7.54621	6.23848	7.38533	8.1009	7.75893	7.65054	coding	NM_031212	SLC25A28	RefSeq_coding	1584	chr10	-	101370274	101380221		AGTTAAAAAAGACATTGAGTGATGTAATCCACCCTGGGGGCAATAGCCATATTGCCAATG	81894	Hs.403790	GO:0006811|GO:0006826|GO:0016021|GO:0016020|GO:0005743|GO:0005739	NP_112489	Solute carrier family 25, member 28
ASHG19A3A017623	868.992	408.747	624.78	408.123	552.964	821.487	532.259	229.636	733.101	444.496	750.735	664.75	9.63553	8.71255	9.39409	9.13869	9.11685	9.50881	9.13383	8.64345	8.92417	8.67872	9.32112	9.11802	coding	NM_016558	SCAND1	RefSeq_coding	916	chr20	-	34541545	34542428		TCCGACTCCCTCAAGGGTGACGCGAGCTCTGCCCTTTAACCGGAAACGTCTCCCTGCTCA	51282	Hs.584909	GO:0042802|GO:0003700|GO:0006355|GO:0006351|GO:0016032|GO:0005634	NP_361012	SCAN domain containing 1
ASHG19A3A044487	5138.5	2188.86	8377.96	4209.33	7598.38	4644.76	6506.44	2566.21	10854.1	3731.27	10720.5	3823.79	12.2632	11.146	13.223	12.217	13.093	11.9777	12.9313	11.7871	13.1839	11.7749	13.3006	11.6835	coding	NM_001134363	RBM20	RefSeq_coding	7233	chr10	+	112404154	112599227		GCCCCCCTCCACTTGCCGCATATCTGTAGCATCTGTGACAAGAAGGTGTTTGATTTGAAG	282996	Hs.116630	GO:0003723|GO:0000166|GO:0008270|GO:0005622|GO:0005634	NP_001127835	RNA binding motif protein 20
ASHG19A3A045946	303.723	447.945	247.078	173.095	409.509	429.567	374.136	140.943	696.523	610.953	424.305	605.038	8.12367	8.84055	8.11437	7.91069	8.67743	8.53881	8.63475	7.95631	8.84772	9.15592	8.53151	8.95938	coding	NM_018982	YIPF1	RefSeq_coding	1876	chr1	-	54317406	54355453		ATAACCGACGCGTTGCATTGGCCACAATTGTGACAATTGTGTTGCTCCATATGCTGCTTT	54432	Hs.11923	GO:0016021|GO:0016020|GO:0030133	NP_061855	Yip1 domain family, member 1
ASHG19A3A013177	129.582	70.7012	59.441	59.0677	107.801	125.685	78.726	51.968	92.2885	78.2271	88.9222	119.868	6.90996	6.00516	6.17664	6.25811	6.77197	6.74242	6.37683	6.48247	6.04039	6.14506	6.46603	6.48714	coding	NM_005762	TRIM28	RefSeq_coding	2989	chr19	+	59055835	59062082		ATTGCAACGTACACAAGCATGAACCCCTTGTGCTGTTTTGTGAGAGCTGTGATACTCTCA	10155	Hs.467408	GO:0070087|GO:0046872|GO:0005515|GO:0004672|GO:0043565|GO:0003700|GO:0003713|GO:0003714|GO:0016564|GO:0008270|GO:0001837|GO:0010467|GO:0000122|GO:0043193|GO:0046777|GO:0006357|GO:0006351|GO:0006351|GO:0000785|GO:0005622|GO:0005719|GO:0005720|GO:0005730|GO:0005654|GO:0005634	NP_005753	Tripartite motif-containing 28
ASHG19A3A044124	103.901	83.4494	90.963	88.0947	89.0107	95.1192	85.6526	71.186	131.656	78.6145	91.2392	116.297	6.58826	6.26025	6.7574	6.88551	6.50148	6.34207	6.49878	6.94967	6.51075	6.15416	6.49863	6.44305	coding	NM_014000	VCL	RefSeq_coding	5647	chr10	+	75757871	75879912		TACGAACCTGAGCTGCTGTTAATGCCATCCAATCAGCCGGTCAACCAGCCCATTCTGGCC	7414	Hs.643896	GO:0017048|GO:0003779|GO:0045294|GO:0008013|GO:0002166|GO:0045296|GO:0005515|GO:0005198|GO:0034333|GO:0043297|GO:0007596|GO:0007155|GO:0007160|GO:0006928|GO:0090136|GO:0030032|GO:0002009|GO:0006936|GO:0030336|GO:0030168|GO:0002576|GO:0034394|GO:0005884|GO:0005912|GO:0005913|GO:0005911|GO:0030055|GO:0043034|GO:0043034|GO:0005737|GO:0005856|GO:0005829|GO:0005829|GO:0005576|GO:0005916|GO:0005925|GO:…	NP_054706	Vinculin
ASHG19A3A033115	3859.61	1627.45	3782.63	1979.9	3218.88	2563.04	2870.88	1874.32	6071.82	2487.37	5204.97	3270.86	11.8293	10.7248	12.003	11.2368	11.7535	11.1359	11.6761	11.4065	12.2646	11.16	12.173	11.4656	coding	NM_001142749	KIAA1324L	RefSeq_coding	6855	chr7	-	86506224	86689014		GCGGCCTGGGCTGGGGACCTGCCCTCCTCCTCCAGCCGCCCGCTTCCTCCTTGCCAGGAG	222223	Hs.208093	GO:0016021|GO:0016020	NP_689961	KIAA1324-like
ASHG19A3A053105	3197.57	731.049	2414.25	1184.28	1819.72	1922.86	1409.81	658.872	2855.46	1061.46	2755.4	1251.5	11.5338	9.59408	11.3381	10.5717	10.888	10.7212	10.5924	10.0806	11.0527	9.98006	11.2127	10.107	coding	NM_003978	PSTPIP1	RefSeq_coding	1870	chr15	+	77287464	77329671		ATTTTGCTGCTGATTCTAGCCCCAAACAAAACAGGTTGAGCTTTTTCCTCCCCTCAGAAG	9051	Hs.129758	GO:0003779|GO:0003824|GO:0005515|GO:0019903|GO:0007155|GO:0007165|GO:0005826|GO:0032154|GO:0005737|GO:0005856|GO:0030027|GO:0048471|GO:0001725	NP_003969	Proline-serine-threonine phosphatase interacting protein 1
ASHG19A3A034574	66.682	42.5832	54.3326	28.6248	91.4503	86.2541	69.1892	35.0704	88.4127	57.6809	69.423	71.2564	5.94399	5.23503	6.05983	5.11582	6.54221	6.1977	6.19868	5.90499	5.97821	5.69649	6.13657	5.68098	coding	NM_000941	POR	RefSeq_coding	2509	chr7	+	75544419	75616172		CTGGTTCCTCTTCAGAAAGAAAAAAGAAGAAGTCCCCGAGTTCACCAAAATTCAGACATT	5447	Hs.354056	GO:0010181|GO:0050661|GO:0003958|GO:0003958|GO:0019899|GO:0050660|GO:0005506|GO:0016491|GO:0090346|GO:0071375|GO:0046210|GO:0055114|GO:0055114|GO:0032770|GO:0090181|GO:0005783|GO:0005789|GO:0016020|GO:0005792|GO:0005739|GO:0005625	NP_000932	P450 (cytochrome) oxidoreductase
ASHG19A3A037298	106.011	111.983	72.9793	91.2443	159.804	165.296	83.0665	72.8558	109.064	129.483	91.7199	156.878	6.61413	6.70859	6.44694	6.94196	7.31613	7.1426	6.45397	6.98674	6.25785	6.88367	6.50559	6.89216	coding	NM_004629	FANCG	RefSeq_coding	2649	chr9	-	35073834	35080013		ATCTGCTGTTACTTCTGAAAACTTGGAGTCCCCCAGCTGAGGAATTAGATGCTCCATTGA	2189	Hs.591084	GO:0003684|GO:0005515|GO:0006281|GO:0000075|GO:0007005|GO:0001541|GO:0009314|GO:0007286|GO:0005737|GO:0005739|GO:0005654|GO:0005634	NP_004620	Fanconi anemia, complementation group G
ASHG19A3A008997	7472.01	12013.2	7009.64	14675.5	6846.82	11457	6148.36	6937.97	7465.72	12663.3	6687.99	9590.66	12.7783	13.4	12.9235	13.9843	12.9235	13.3121	12.8592	13.0272	12.5653	13.5181	12.5379	12.9711	coding	NM_015528	RNF167	RefSeq_coding	1723	chr17	+	4843629	4848515		GGCAAGCAGAGGGACTGGGTCTTCACTTCTTGGGCTAATAAAATTGTTTCTTTGTGGACT	26001	Hs.7158	GO:0016874|GO:0046872|GO:0005515|GO:0004842|GO:0008270|GO:0045786|GO:0000209|GO:0005737|GO:0012505|GO:0016021|GO:0016020	NP_056343	Ring finger protein 167
ASHG19A3A047045	52.0395	82.6754	51.5236	74.7034	64.7664	114.843	55.8571	55.6052	66.3212	78.0541	48.1588	122.771	5.58993	6.24491	5.99225	6.62321	6.04485	6.6151	5.88906	6.58373	5.57087	6.14182	5.65542	6.52526	coding	NM_174926	TMEM136	RefSeq_coding	922	chr11	+	120196015	120201346		TGTTTTTCTGGTTTTGGTCTTTTCATCACAGGATGGCATTAGCTCTGTGTCTGCAGGTGC	219902	Hs.643516	GO:0016021|GO:0016020	NP_777586	Transmembrane protein 136
ASHG19A3A017570	272.333	227.414	163.354	134.936	266.116	373.188	155.052	130.596	259.507	281.974	254.268	389.527	7.96038	7.82606	7.55598	7.53428	8.04817	8.33484	7.35613	7.83936	7.43787	8.01927	7.84975	8.2875	coding	NM_007238	PXMP4	RefSeq_coding	5727	chr20	-	32290550	32308136		CTGGCGGCCTTCCTCGGGGGTATCCTGGTGTTTGGAGAAAACAATAACATCAACAGCCAG	11264	Hs.654857	GO:0016021|GO:0016020|GO:0005624|GO:0005778|GO:0005777	NP_899634	Peroxisomal membrane protein 4, 24kDa
ASHG19A3A025653	651.062	1512.59	762.575	2981.63	680.39	1165.57	706.759	1546.73	1002.79	1538.44	780.939	808.327	9.21593	10.6181	9.67329	11.7684	9.41644	10.0056	9.55281	11.1532	9.37749	10.5087	9.37448	9.41074	coding	NM_001037442	RUFY3	RefSeq_coding	4435	chr4	+	71587695	71674335		GTTACTTGGTGAAGCTGAAGTTTAAGAGTTCTGGGGAAAAATAAAATCTAGTAATTCCAG	22902	Hs.7972	GO:0030154|GO:0007275|GO:0050771|GO:0007399|GO:0030175|GO:0030426	NP_055776	RUN and FYVE domain containing 3
ASHG19A3A020491	307.159	72.484	175.384	100.118	106.401	148.016	95.1224	35.8838	155.216	99.8994	183.023	115.525	8.13929	6.03782	7.64594	7.08574	6.75498	6.98108	6.65073	5.93694	6.73046	6.50965	7.40656	6.43351	coding	NM_005297	MCHR1	RefSeq_coding	2423	chr22	+	41075181	41078817		TTAATGTGCATCTGCCTCCGAATGTTAATGTGTCTAGGTGATGTCAGTGGGAGCCATGAA	2847	Hs.248122	GO:0004930|GO:0042562|GO:0030273|GO:0008188|GO:0008022|GO:0004872|GO:0007186|GO:0007204|GO:0007631|GO:0006091|GO:0007193|GO:0007218|GO:0051928|GO:0005887|GO:0031513|GO:0005886|GO:0005886	NP_005288	Melanin-concentrating hormone receptor 1
ASHG19A3A029921	172.761	123.944	94.8062	26.8376	399.772	366.026	205.801	18.9837	228.871	263.559	146.972	179.716	7.32504	6.86662	6.81322	5.00993	8.63941	8.30751	7.76356	4.99045	7.27188	7.92707	7.12373	7.10791	coding	NM_001097616	GPR89C	RefSeq_coding	1569	chr1	+	145883867	145924048	NM_016334,NM_001097613,NM_001097612,	AACCATCAGGTTTCTGGGGAATGATAAAAAGTGTTACCACTTCAGCATCAGGAAGTGAAA	653519	Hs.559115	GO:0004871|GO:0008308|GO:0051452|GO:0006811|GO:0043123|GO:0015031|GO:0044070|GO:0007165|GO:0005794|GO:0032580|GO:0030660|GO:0016021|GO:0016020	NP_001091082	G protein-coupled receptor 89A
ASHG19A3A008199	182.011	1039.64	73.1099	55.5687	75.6193	138.2	123.509	208.172	69.7055	363.107	52.5877	119.74	7.39643	10.1115	6.45069	6.15899	6.27358	6.88137	7.02921	8.5073	5.6424	8.37828	5.77382	6.48503	coding	NM_001032278	MMP28	RefSeq_coding	1042	chr17	-	34105509	34122640		CAAAACCCATGTAATTCCTTGATAAATTTTCAATGCAGGGCAGATAAACTGTTGCTAACA	79148	Hs.380710	GO:0005509|GO:0004222|GO:0008233|GO:0008270|GO:0008152|GO:0006508|GO:0005576|GO:0005578	NP_077278	Matrix metallopeptidase 28
ASHG19A3A002658	269.789	173.164	251.24	130.685	215.547	224.23	167.983	88.2622	205.323	213.658	258.885	274.412	7.94562	7.39433	8.13865	7.48713	7.74778	7.58786	7.47488	7.27283	7.11781	7.61592	7.87636	7.75857	coding	NM_001143966	TBC1D7	RefSeq_coding	1064	chr6	-	13305185	13328770		ATCATTAGAAATTCTCCTAAAAGATGACCGTCTGGGAATCTTGCCTCCACACCACGAGTC	51256	Hs.484678	GO:0005096|GO:0005097|GO:0005515|GO:0031398|GO:0032313|GO:0016023|GO:0031410|GO:0005622	NP_057579	TBC1 domain family, member 7
ASHG19A3A043425	421.321	1700.02	258.965	1842.1	628.952	1710.51	661.595	1161.14	228.142	1501.27	1338.82	4428.39	8.58243	10.7863	8.17901	11.1492	9.30088	10.5553	9.4533	10.7932	7.26598	10.4702	10.1167	11.8809	coding	NM_000760	CSF3R	RefSeq_coding	3003	chr1	-	36931643	36948509	NM_172313,NM_156039,NM_156038,	GGCCTTTTGTGCTTGTTTCCTATAACTTCAGTATTGTAAACTAGTTTTTGGTTTGCAGTT	1441	Hs.524517	GO:0004896|GO:0004872|GO:0007155|GO:0006952|GO:0007165|GO:0005576|GO:0005887|GO:0005886	NP_758519	Colony stimulating factor 3 receptor (granulocyte)
ASHG19A3A019827	2018.42	3048.82	1438.8	1848.95	2534.98	5595.79	1990.42	756.599	2588.47	3477.49	2082.13	3847.89	10.859	11.6012	10.5654	11.1549	11.383	12.2577	11.1235	10.2698	10.888	11.6674	10.7893	11.6921	coding	NM_194326	RPS19BP1	RefSeq_coding	952	chr22	-	39925098	39928860		GTAAACCTGAAGTTTCTGACCAGGACGAGAAGCACCGTGGCTGAGTCTGTGAGCCAGCAG	91582	Hs.526933	GO:0005730|GO:0005654|GO:0005634	NP_919307	Ribosomal protein S19 binding protein 1
ASHG19A3A054632	363.76	250.475	379.902	258.391	355.454	243.651	338.602	290.961	1000.57	390.889	708.479	434.818	8.37878	7.96962	8.71099	8.50291	8.47163	7.71669	8.48528	8.97748	9.37335	8.48464	9.2345	8.46207	coding	NM_001174069	LMX1A	RefSeq_coding	3366	chr1	-	165171104	165325478		CCAGAAGCGGGCGGGACGCCCTCCGGGTCCCTTACAGTGCCCCTTCTCGACCTGGGGCAG	4009	Hs.667312	GO:0046872|GO:0043565|GO:0003700|GO:0030528|GO:0008270|GO:0007411|GO:0021953|GO:0021549|GO:0021542|GO:0007275|GO:0045665|GO:0001558|GO:0006355|GO:0005634	NP_796372	LIM homeobox transcription factor 1, alpha
ASHG19A3A004070	253.177	283.217	163.776	55.4512	341.979	506.232	350.321	50.6283	504.11	394.461	219.743	524.193	7.85444	8.16236	7.55896	6.1554	8.41707	8.7911	8.53422	6.44162	8.38326	8.49744	7.64947	8.74742	coding	NM_002766	PRPSAP1	RefSeq_coding	2359	chr17	-	74306867	74350230		TGTAGCTAAGTCTCCTGATGCTGCAAAGAGGGCCCAGTCCTATGCGGAGAGACTGCGTCT	5635	Hs.77498	GO:0004857|GO:0042802|GO:0000287|GO:0005515|GO:0004749|GO:0006139|GO:0009165|GO:0043234	NP_002757	Phosphoribosyl pyrophosphate synthetase-associated protein 1
ASHG19A3A044354	23629	55212.2	18366.3	62892	25585.1	91699.7	22973.1	64446.9	21285.1	64421	25132.5	39865.4	14.6855	15.1714	14.4999	15.838	15.0648	16.2218	14.8613	15.6047	14.3224	15.6584	14.8171	14.9349	coding	NM_002629	PGAM1	RefSeq_coding	1762	chr10	+	99186026	99193197		CATGGGTCCAGTGTTCATCTGAGCATAACTGTACTAAATCCTTTTTCCATATCAGTATAA	5223	Hs.632918	GO:0004083|GO:0004082|GO:0016787|GO:0016853|GO:0004619|GO:0004619|GO:0019901|GO:0005975|GO:0006094|GO:0006006|GO:0006096|GO:0006110|GO:0043456|GO:0045730|GO:0005829|GO:0005829	NP_002620	Phosphoglycerate mutase 1 (brain)
ASHG19A3A019461	993.958	431.842	681.45	508.907	808.984	1174.99	608.141	363.2	1513.49	686.027	1199.95	1035.69	9.82074	8.79274	9.51164	9.43912	9.66035	10.0155	9.32654	9.2796	10.0101	9.32691	9.94957	9.80602	coding	NM_005984	SLC25A1	RefSeq_coding	1620	chr22	-	19163094	19166301		GGGCCTGTACCGCGGCCTTAGCTCCCTGCTCTACGGTTCCATCCCCAAGGCGGCCGTCAG	6576	Hs.725671	GO:0015137|GO:0005515|GO:0015142|GO:0005975|GO:0044255|GO:0006094|GO:0006006|GO:0035338|GO:0006843|GO:0035674|GO:0019432|GO:0016021|GO:0016020|GO:0005743|GO:0005739	NP_005975	Solute carrier family 25 (mitochondrial carrier; citrate transporter), member 1
CUST_1_PI418767722	33728.3	42909.9	26345.3	27375.7	25843.7	39524.4	33970.8	35109.3	22955.6	43558.1	27096.5	31920.2	15.306	14.8912	15.0501	14.811	15.082	14.9753	15.3899	14.9462	14.4463	15.1071	14.969	14.6067	coding	NM_002107	H3F3A	RefSeq_coding	1117	chr1	+	226250420	226259702	NR_002315,	CATGCAAGTACATGTTTTTAATGTTGTCTGTCTTCTGTGCTGTTCCTGTAAGTTTGCTAT	3020	Hs.533624		NP_002098	H3 histone, family 3A
ASHG19A3A051404	1099.17	1615.55	618.839	810.336	770.698	1926.58	878.532	458.21	714.697	943.332	684.211	1245.88	9.97197	10.7148	9.37778	10.057	9.59505	10.7264	9.87215	9.58219	8.88685	9.81438	9.17912	10.0968	coding	NM_002408	MGAT2	RefSeq_coding	2728	chr14	+	50087488	50090198		TCCTGTACTATTGTGTTTTGAGTGTGTTTTGGAACCTTCATAGAACACACTTTCTTTTGG	4247	Hs.93338	GO:0008455|GO:0005529|GO:0016757|GO:0044267|GO:0009312|GO:0009311|GO:0043687|GO:0006487|GO:0018279|GO:0005794|GO:0000139|GO:0005795|GO:0016021|GO:0016020|GO:0005624	NP_002399	Mannosyl (alpha-1,6-)-glycoprotein beta-1,2-N-acetylglucosaminyltransferase
ASHG19A3A001496	3030.48	1289.05	3040.81	1625.9	2993.84	2249.63	3254.25	2095.44	5589.69	1921.19	4392.59	2499.14	11.4563	10.4082	11.6882	10.9834	11.6456	10.9399	11.8766	11.5439	12.1305	10.8213	11.9327	11.0926	coding	NM_001077261	NCOR2	RefSeq_coding	8550	chr12	-	124808961	125020149		GCGAGCGGCTGCCATCCCCCCCATCCAGGTCACCAAAGTCCATGAGCCCCCCCGGGAGGA	9612	Hs.137510	GO:0003677|GO:0005112|GO:0042826|GO:0047485|GO:0005515|GO:0003714|GO:0003714|GO:0016564|GO:0044255|GO:0010553|GO:0000122|GO:0072365|GO:0016604|GO:0005730|GO:0005654|GO:0005634|GO:0005634|GO:0017053	NP_006303	Nuclear receptor corepressor 2
ASHG19A3A019902	1540.57	1919.57	1513.58	2684.1	1377.61	2501.43	1117.37	1308.98	1845.73	2070.3	1769.41	4086.23	10.4641	10.9777	10.6369	11.6358	10.4588	11.0976	10.2362	10.9369	10.3395	10.9217	10.5363	11.7836	coding	NM_015140	TTLL12	RefSeq_coding	3421	chr22	-	43562628	43583137		AAGAACTATCTTTCTTGTAGCAAAGCTGCACCTGATGATGCTGCCTCTCCTCTCTGTGTT	23170	Hs.517670	GO:0004835|GO:0006464	NP_055955	Tubulin tyrosine ligase-like family, member 12
ASHG19A3A008852	2288.88	2415.82	6381.12	1890.19	5323.73	4893.22	5546.98	2207.09	2768	1532.22	7424.97	5616.29	11.0409	11.2873	12.7827	11.1782	12.5314	12.06	12.7062	11.6012	10.9936	10.5031	12.7031	12.217	coding	NM_005567	LGALS3BP	RefSeq_coding	2277	chr17	-	76967335	76976061		GGGCCTTTGGTCAAATATTCTTCTGATTACTTCCAAGCCCCCTCTGACTACAGATACTAC	3959	Hs.514535	GO:0005515|GO:0005044|GO:0007155|GO:0006968|GO:0007165|GO:0031012|GO:0005576|GO:0005615|GO:0016020|GO:0005578	NP_005558	Lectin, galactoside-binding, soluble, 3 binding protein
ASHG19A3A015322	1785.36	3211.6	1152.64	3147.05	1190.66	3374.56	2513.09	2109.29	1218.15	3712.36	1587.23	1804.93	10.6704	11.6681	10.2625	11.8409	10.2367	11.5244	11.4823	11.5499	9.66118	11.7694	10.3755	10.6457	coding	NM_152391	PQLC3	RefSeq_coding	1812	chr2	+	11295539	11318996		GAAGGCATTGTTTTGTTAGATGCAGTAATGATGTTTACCAGAGATTATTGTTTCCTATGC	130814	Hs.274415	GO:0016021|GO:0016020	NP_689604	PQ loop repeat containing 3
ASHG19A3A006338	255.111	151.443	214.65	152.989	308.72	274.842	298.229	99.5585	430.064	266.925	447.115	195.733	7.86473	7.18393	7.92923	7.72432	8.26967	7.88773	8.29375	7.45011	8.15017	7.94292	8.60287	7.24142	coding	NM_172361	CD46	RefSeq_coding	3146	chr1	+	207925401	207968857	NM_172357,	ATCCCCCAGTTCCAAAGTGTCTTAAAGGATATCCTAAACCTGAGGAAGGAATACTTGACA	4179	Hs.510402	GO:0001848|GO:0004175|GO:0004857|GO:0004872|GO:0006958|GO:0045087|GO:0044419|GO:0045916|GO:0006508|GO:0007338|GO:0005794|GO:0001669|GO:0016323|GO:0009986|GO:0005737|GO:0031410|GO:0002079|GO:0005887|GO:0005886	NP_758871	CD46 molecule, complement regulatory protein
ASHG19A3A013414	190.201	142.804	206.121	202.025	175.9	193.517	157.411	156.792	365.334	229.488	281.445	526.129	7.46084	7.08316	7.87073	8.13391	7.45406	7.36912	7.38047	8.11397	7.90947	7.71907	7.98113	8.75338	coding	NM_001166239	CGREF1	RefSeq_coding	1783	chr2	-	27323462	27341773		CCCGCCCCGGCCGGCCGGAGACCCGAGCCCATCGCCGTCAGCCAGCCAGGGCCGCGCGGG	10669	Hs.159525	GO:0005509|GO:0007155|GO:0007049|GO:0007050|GO:0030308|GO:0008285|GO:0006950|GO:0005576	NP_006560	Cell growth regulator with EF-hand domain 1
ASHG19A3A012212	269.739	407.186	174.128	126.748	272.112	465.65	359.291	63.3154	423.791	308.949	256.101	612.48	7.94525	8.70727	7.63705	7.43991	8.08185	8.66559	8.57016	6.77668	8.1313	8.15181	7.8608	8.97927	coding	NM_001137673	ILF3	RefSeq_coding	3757	chr19	+	10764936	10796443		AAGCCCACCTTTGCTTTTTATGGAAAGCATTACTTTATTTAAAGAGACAGACAATGACGC	3609	Hs.465885	GO:0003677|GO:0003723|GO:0003725|GO:0005515|GO:0016563|GO:0016564|GO:0000279|GO:0045892|GO:0045893|GO:0005737|GO:0005622|GO:0005739|GO:0005730|GO:0005634|GO:0005634|GO:0030529	NP_703194	Interleukin enhancer binding factor 3, 90kDa
ASHG19A3A026020	45.5292	55.9964	59.2934	55.9299	47.2258	57.1041	55.0217	41.1163	66.3383	67.9934	68.6072	37.2647	5.39857	5.64623	6.17385	6.17075	5.62947	5.58275	5.86738	6.13561	5.5714	5.94519	6.12179	4.66307	coding	NM_024900	PHF17	RefSeq_coding	4190	chr4	+	129730778	129785785		GAGTTGCAGTTATTTGTAATTATAAACAGTAAGTGTATCAGGGCAGGGGTGACAATAAAA	79960	Hs.12420	GO:0046872|GO:0005515|GO:0008270|GO:0006915|GO:0043966|GO:0043983|GO:0043984|GO:0043981|GO:0043982|GO:0030308|GO:0006950|GO:0005737|GO:0000123|GO:0005739|GO:0005634	NP_955352	PHD finger protein 17
ASHG19A3A006563	137.917	68.8858	136.717	60.5905	145.609	121.965	115.276	50.9265	184.278	65.9868	173.359	104.833	6.99782	5.96314	7.32337	6.29725	7.1856	6.70076	6.92986	6.44981	6.96766	5.89952	7.33688	6.28151	coding	NM_181642	SPINT1	RefSeq_coding	2484	chr15	+	41136245	41149852		GGGGCTCAGGCGACTTTCCCCCAGGGCCCCTCCATGGAAAGGCGCCATCCAGGTGGGCTT	6692	Hs.233950	GO:0030414|GO:0005515|GO:0004867|GO:0005576|GO:0005624	NP_857593	Serine peptidase inhibitor, Kunitz type 1
ASHG19A3A047318	761.707	6173.56	742.267	473.305	1215.8	3005.27	1131.58	195.201	1931.12	1950.31	1025.36	4896.23	9.43964	12.5775	9.63438	9.3444	10.2647	11.363	10.2584	8.42193	10.4125	10.8386	9.7495	12.0208	coding	NM_003651	CSDA	RefSeq_coding	1976	chr12	-	10851677	10875953	NR_027011,	TACCACGTGGGACAGACCTTTGACCGTCGCTCACGGGTCTTACCCCATCCCAACAGAATA	8531	Hs.221889	GO:0003677|GO:0003702|GO:0003690|GO:0003730|GO:0003700|GO:0003697|GO:0003714|GO:0016564|GO:0009566|GO:0001701|GO:0008584|GO:0043066|GO:0048642|GO:0000122|GO:0031100|GO:0046622|GO:0006355|GO:0009409|GO:0007283|GO:0006351|GO:0005737|GO:0005921|GO:0005634|GO:0005844	NP_003642	Cold shock domain protein A
ASHG19A3A054772	1792.81	110.601	2212.22	1640.91	1866.01	913.503	1221.52	1306.71	1592.96	564.011	1330.38	176.952	10.6778	6.68778	11.1998	10.9947	10.9303	9.66067	10.3627	10.9336	10.0982	9.02701	10.1064	7.08233	coding	NM_001017967	MARVELD3	RefSeq_coding	2239	chr16	+	71660069	71675866		ATAGTAATCTCATTACCCTGGACTGTTCTCATAATGTAACAGATCACTAACACTGAATCT	91862	Hs.513706	GO:0016021|GO:0016020	NP_443090	MARVEL domain containing 3
ASHG19A3A002413	336.751	361.71	374.972	394.536	340.804	370.559	328.603	298.147	570.579	344.333	408.774	523.823	8.27453	8.52908	8.69152	9.09104	8.41261	8.3246	8.43132	9.00805	8.56316	8.30593	8.47789	8.74579	coding	NM_001136196	TNPO2	RefSeq_coding	4949	chr19	-	12810008	12833462		CCCAAGACACTGCTGGAAAACACAGGTCGCCTGACGAGTCCCTCTGCCATTCCAGCCATC	30000	Hs.416049	GO:0008139|GO:0005515|GO:0008565|GO:0006886|GO:0005737|GO:0005634	NP_038461	Transportin 2
ASHG19A3A046081	172.58	170.96	191.156	152.796	195.333	184.731	172.907	177.005	373.574	203.692	230.559	266.618	7.32337	7.37498	7.76309	7.72204	7.59938	7.30821	7.51845	8.28205	7.94424	7.54194	7.71476	7.7184	coding	NM_001005181	OR56B4	RefSeq_coding	960	chr11	+	6129008	6129966		CAGAGAAAAAGATTCCCCTTATTCCTGTGTTCCTTAATGTGCTGCACAATGTCATCCCCC	196335	Hs.632154	GO:0004984|GO:0004872|GO:0050896|GO:0007608|GO:0016021|GO:0005886	NP_001005181	Olfactory receptor, family 56, subfamily B, member 4
ASHG19A3A012069	1431.99	1013.33	1506.88	1111.54	1722.89	2564.39	1092.48	1031.89	1799.84	1172.75	960.883	355.177	10.3537	10.0745	10.6305	10.4813	10.8014	11.1371	10.197	10.6506	10.2973	10.1185	9.6577	8.14864	coding	NM_001159846	MPND	RefSeq_coding	1523	chr19	+	4343523	4360082		GATGTGGAGATGGCCTACGTCCAGGACAGCTTCCTGACCAATGACATCCTTCACGAGATG	84954	Hs.321689	GO:0008233	NP_116257	MPN domain containing
ASHG19A3A052530	564.138	1170.31	400.642	603.702	613.904	2256	570.558	232.504	834.569	1564.68	441.745	1257.41	9.01297	10.2777	8.77946	9.65995	9.26503	10.9442	9.23908	8.65865	9.11165	10.5302	8.58675	10.1125	coding	NM_001126131	POLG	RefSeq_coding	4452	chr15	-	89859536	89878026		TTTTCAGTGCAGTCGATATTGACCGGTGCCTCAGGAAGGAAGTGACCATGGATTGTAAAA	5428	Hs.706868	GO:0003677|GO:0003887|GO:0004527|GO:0016779|GO:0002020|GO:0005515|GO:0016740|GO:0006259|GO:0006261|GO:0007568|GO:0006287|GO:0006264|GO:0005760|GO:0005743|GO:0042645|GO:0005739	NP_002684	Polymerase (DNA directed), gamma
ASHG19A3A008575	147.635	211.682	162.572	209.298	169.252	196.169	138.233	94.9139	222.813	186.561	155.902	289.571	7.09694	7.71446	7.55156	8.18992	7.40153	7.39085	7.19354	7.38024	7.23543	7.41127	7.19739	7.8348	coding	NM_052855	ANKRD40	RefSeq_coding	4169	chr17	-	48770551	48785270		GACCAGCGCCAGCATTCCAGCCATTTTTCTTCACTGGAGCATTTCCATTTAATATGCAAG	91369	Hs.463426		NP_443087	Ankyrin repeat domain 40
ASHG19A3A052447	85.3334	181.029	92.0264	179.158	79.3502	132.695	83.3084	82.6129	133.315	128.162	87.3221	175.481	6.30838	7.46239	6.77226	7.96012	6.3418	6.82159	6.45802	7.17144	6.52537	6.86877	6.43842	7.06947	coding	NM_153815	RASGRF1	RefSeq_coding	4860	chr15	-	79252290	79298002		ATGAGACAAGCTATGGTTTGCAATGTTCTGGATGTATAACCTGTTTCCAGCCTGGCCTGA	5923	Hs.459035	GO:0005088|GO:0005089|GO:0005085|GO:0032863|GO:0006915|GO:0008624|GO:0007616|GO:0048011|GO:0031175|GO:0032320|GO:0035020|GO:0046578|GO:0035023|GO:0051056|GO:0007165|GO:0007264|GO:0007268|GO:0005829|GO:0005829|GO:0005829|GO:0030426|GO:0005622|GO:0005886|GO:0005886|GO:0019717	NP_722522	Ras protein-specific guanine nucleotide-releasing factor 1
ASHG19A3A029718	229.106	142.996	129.58	76.3438	226.145	336.476	174.287	44.3306	152.972	206.093	200.245	136.853	7.71366	7.08533	7.24641	6.65811	7.81503	8.18342	7.52867	6.24518	6.70914	7.55768	7.52507	6.69156	coding	NM_000434	NEU1	RefSeq_coding	2088	chr6	-	31826829	31830709		AGTGAGCGATGTTGAGACAGGAGTAGTATTTCTTTTCTACTCCCTTTGTGCTCACAAGGC	4758	Hs.520037	GO:0004308|GO:0016798|GO:0005515|GO:0008152|GO:0016023|GO:0043202|GO:0005765|GO:0005764|GO:0005886	NP_000425	Sialidase 1 (lysosomal sialidase)
ASHG19A3A048707	234.678	169.271	183.267	174.006	192.893	199.643	163.983	149.121	287.2	215.611	209.847	240.721	7.74493	7.36028	7.70471	7.9186	7.58066	7.41639	7.43787	8.0425	7.58302	7.62896	7.58786	7.5509	coding	NM_001345	DGKA	RefSeq_coding	2756	chr12	+	56324945	56347805		TGAAAGGACCTTTCACTCCCTACTTTTGGCCAGGGCCTTCTGTGCCACCTGCCAAGACCA	1606	Hs.524488	GO:0005524|GO:0005509|GO:0004143|GO:0000166|GO:0005543|GO:0016740|GO:0007205|GO:0007596|GO:0035556|GO:0030168|GO:0005829|GO:0005886	NP_963848	Diacylglycerol kinase, alpha 80kDa
ASHG19A3A016629	580.564	1916.15	297.984	160.701	340.664	452.124	395.568	1705.31	399.134	951.781	391.177	116.197	9.05314	10.9747	8.37311	7.80022	8.41154	8.61475	8.72109	11.286	8.04043	9.82633	8.42646	6.44185	coding	NM_021192	HOXD11	RefSeq_coding	1463	chr2	+	176972083	176974314		CTTCCTCTTCGGTGAATGCAGGTTATTTAAACTTTGGGAAATGTACTTTTAGTCTGTCAT	3237	Hs.421136	GO:0043565|GO:0003700|GO:0030528|GO:0009952|GO:0001658|GO:0060351|GO:0048589|GO:0009953|GO:0042733|GO:0001656|GO:0001759|GO:0007389|GO:0010720|GO:0032332|GO:0009954|GO:0006355|GO:0001501|GO:0006351|GO:0005634	NP_067015	Homeobox D11
ASHG19A3A003107	559.718	382.973	493.065	318.538	406.935	489.28	369.987	245.515	959.954	418.886	718.677	625.252	9.00032	8.62065	9.06743	8.79856	8.66847	8.7395	8.61886	8.7372	9.31289	8.59051	9.25442	9.01097	coding	NM_001161530	CSF2RA	RefSeq_coding	1789	chrY	+	1351570	1378828		tcaagcgattctcctgcctcagactcccagGTTCTGACGACGGGAACCTCGGCTCTGTGT	1438	Hs.520937	GO:0004896|GO:0005515|GO:0004872|GO:0005576|GO:0005887|GO:0005886|GO:0005886	NP_758452	Colony stimulating factor 2 receptor, alpha, low-affinity (granulocyte-macrophage)
ASHG19A3A030650	8706.39	9433.25	8073.74	13451.8	9328.2	7497.53	7097.19	9949.82	6898	10382.8	9685.07	9930.31	13.04	13.1221	13.1742	13.8664	13.4242	12.681	13.0637	13.4346	12.4628	13.2243	13.1391	13.0127	coding	NM_031287	SF3B5	RefSeq_coding	786	chr6	-	144416017	144416754		CGTCTCGTTTTTGGCTAATTGATTGTCATTGGCTTTTTCCATAAAGTTTAGAAATCGTTC	83443	Hs.110695	GO:0008380|GO:0010467|GO:0000398|GO:0005689|GO:0005654|GO:0005634	NP_112577	Splicing factor 3b, subunit 5, 10kDa
ASHG19A3A000772	3196.94	818.262	1900.36	1105.63	1654.44	1684.26	1253.48	724.337	2392.94	1005.73	2028.6	1062.51	11.5327	9.75573	10.9831	10.4727	10.7363	10.5278	10.4003	10.213	10.7644	9.90432	10.7468	9.84973	coding	NM_001004057	GRK4	RefSeq_coding	2183	chr4	+	2965342	3042474		TGTCTCCATCCCCTGGCAGAATGAGGGCTGCCTGACCATGGTCCCCAGTGAGAAGGAAGT	2868	Hs.32959	GO:0005524|GO:0004703|GO:0000166|GO:0004871|GO:0016740|GO:0006468|GO:0008277|GO:0005938|GO:0005737	NP_892027	G protein-coupled receptor kinase 4
ASHG19A3A036359	201.954	189.644	190.423	193.128	195.787	204.138	173.765	144.279	318.702	189.817	236.678	280.02	7.54307	7.53497	7.7564	8.07	7.60253	7.45229	7.52487	7.99472	7.72432	7.43616	7.75725	7.78608	coding	NM_001033017	DEFB135	RefSeq_coding	234	chr8	+	11839829	11842099		CCACAAGGAGCGTCCTCTTGGCCCTCGTGGTCCTTAACTTACTCTTCTATGTTCCACCAG	613209	Hs.558284	GO:0042742|GO:0005576	NP_001028189	Defensin, beta 135
ASHG19A3A004928	96.2898	71.3259	74.9644	78.6927	114.181	116.689	86.8414	49.4712	104.087	63.5985	107.729	78.9355	6.47987	6.01655	6.4862	6.70893	6.85788	6.63419	6.51957	6.4055	6.19745	5.84359	6.71738	5.83756	coding	NM_016828	OGG1	RefSeq_coding	2258	chr3	+	9791627	9808352		ACCTTATGCTGGCTGGGCCCAAGCGCTCTGTCAGGTCATCACCACTTTTATGACCTTTCT	4968	Hs.380271	GO:0003684|GO:0004519|GO:0016798|GO:0016829|GO:0008534|GO:0005515|GO:0006281|GO:0006284|GO:0006285|GO:0045007|GO:0045007|GO:0006289|GO:0033158|GO:0006979|GO:0009314|GO:0005737|GO:0005739|GO:0016363|GO:0016607|GO:0005730|GO:0005654|GO:0005654|GO:0005654|GO:0005634	NP_058438	8-oxoguanine DNA glycosylase
ASHG19A3A041335	706.902	1587.17	644.389	478.313	1304.31	1179.23	973.818	250.552	1709.15	1163.07	808.447	585.885	9.33164	10.6839	9.4376	9.36088	10.3737	10.0205	10.0278	8.76383	10.2066	10.1042	9.42157	8.91285	coding	NM_001080425	BEX4	RefSeq_coding	1290	chrX	+	102470019	102472120		GTCGCGGCGGCGCACCTCGCGTCAAGAATCCGGAGGAGGAGACTGCAAGGATAGGCCCAG	56271	Hs.184736	GO:0005737|GO:0005634	NP_001121160	Brain expressed, X-linked 4
ASHG19A3A020642	2141.33	1364.2	3502.8	1995.09	2562.49	1813.26	2189.13	1724.88	3792.67	2248.74	4515.08	2122.06	10.9442	10.4866	11.8809	11.2472	11.3966	10.6506	11.2659	11.2973	11.5046	11.0314	11.9744	10.8578	coding	NM_181809	BMP8A	RefSeq_coding	5642	chr1	+	39957317	39995537		TCCTTACTGAAAAGTCTTGAGCAAACAGTTGCCGCTCTCCACCCCCTGCTTTTTAAAAAA	353500	Hs.472497	GO:0005125|GO:0008083|GO:0051216|GO:0030154|GO:0040007|GO:0007275|GO:0001503|GO:0005576|GO:0005615	NP_861525	Bone morphogenetic protein 8a
ASHG19A3A009101	168.243	148.145	198.49	123.425	167.12	156.386	145.503	109.182	264.796	180.436	198.216	189.21	7.28305	7.14569	7.81754	7.40075	7.38614	7.06466	7.26211	7.5892	7.46706	7.35805	7.51147	7.18575	coding	NM_153007	ODF4	RefSeq_coding	1149	chr17	+	8243187	8249363		TATCCATCCCCATAGGCTGGAGCTATTTCATTGGTTGGCTGGTGCTTATCCTATACTTCA	146852	Hs.186045	GO:0030154|GO:0007275|GO:0007283|GO:0016021|GO:0016020|GO:0009434|GO:0001520	NP_694552	Outer dense fiber of sperm tails 4
ASHG19A3A004939	432.807	165.009	411.281	141.557	398.52	197.211	304.059	192.869	861.04	254.307	545.304	178.727	8.62263	7.31736	8.82035	7.6084	8.63502	7.39798	8.31932	8.40586	9.16192	7.87247	8.86848	7.10063	coding	NM_017452	STAU1	RefSeq_coding	3399	chr20	-	47729877	47804904	NM_001037328,	TCCTGGAACGCCCTCTTTTTAAAAAAGAAAGCATAACCCCTACTGTAGAACTAAATGCAC	6780	Hs.596704	GO:0003725|GO:0005515|GO:0008157|GO:0008298|GO:0005737|GO:0005622|GO:0005875|GO:0043005|GO:0043025|GO:0005791|GO:0010494	NP_059348	Staufen, RNA binding protein, homolog 1 (Drosophila)
ASHG19A3A050105	69.9139	66.6542	78.5769	63.6244	82.6458	76.944	60.6846	44.5185	50.7286	108.945	94.1015	91.0681	6.01418	5.9121	6.55339	6.37025	6.39859	6.03001	6.00419	6.25125	5.20142	6.63242	6.53903	6.05973	coding	NM_182508	C13orf30	RefSeq_coding	3318	chr13	+	43355685	43365683		GGCCTCTGGCTTTGTGATATTATTCTAGAGTCCCAGTAACCCACAATTGTTGATGAGGAG	144809	Hs.16970		NP_872314	Chromosome 13 open reading frame 30
ASHG19A3A003876	3780.64	8894.08	2797.74	1107.49	4091.81	6641.04	3004.27	1123.19	3963.02	8776.35	3365.18	9950.75	11.7919	13.0613	11.5562	10.476	12.1257	12.4999	11.7409	10.7556	11.5735	12.9985	11.5332	13.0151	coding	NM_001207	BTF3	RefSeq_coding	1021	chr5	+	72794249	72801448		CGCGGCCCCTTATTCGCTCCGACAAGATGAAAGAAACAATCATGAACCAGGAAAAACTCG	689	Hs.591768	GO:0003702|GO:0005515|GO:0006366|GO:0005634	NP_001198	Basic transcription factor 3
ASHG19A3A050657	508.857	462.421	777.042	425.917	612.232	507.915	497.817	382.414	1255.39	578.481	1087.64	774.752	8.86057	8.88734	9.6979	9.19986	9.26114	8.79479	9.04885	9.35289	9.70681	9.0638	9.82443	9.34193	coding	NM_138452	DHRS1	RefSeq_coding	1488	chr14	-	24759805	24768666		AGGGTTGTAGTAGTTGTCCACCTCTGGACAGTCCCACTCAGCCCCTTCTTCACTCTCTGG	115817	Hs.348350	GO:0005488|GO:0016491|GO:0055114|GO:0005783|GO:0005743|GO:0005739	NP_612461	Dehydrogenase/reductase (SDR family) member 1
ASHG19A3A003883	145.474	138.014	108.564	86.9113	149.141	180.88	105.219	69.2523	145.885	148.284	128.594	174.302	7.07305	7.03424	6.99966	6.86362	7.22004	7.27534	6.80186	6.90778	6.64668	7.0758	6.9512	7.05841	coding	NM_001241	CCNT2	RefSeq_coding	4513	chr2	+	135676392	135714584		ATGAGCAAAAGTTCCAAAAGTTCAGGTGGGCTACGGACATCTCAGCACCCTCGTGAAACT	905	Hs.658324	GO:0007049|GO:0051301|GO:0010467|GO:0044419|GO:0000079|GO:0006368|GO:0006366|GO:0016032|GO:0005654|GO:0005654|GO:0005634	NP_490595	Cyclin T2
ASHG19A3A026917	642.988	401.096	362.508	107.266	487.626	520.84	266.283	38.13	621.525	436.43	410.282	860.059	9.19815	8.68481	8.64005	7.18723	8.93636	8.83054	8.13209	6.02704	8.67969	8.65147	8.48404	9.51128	coding	NM_001515	GTF2H2	RefSeq_coding	1951	chr5	-	70330952	70363497	NR_033417,NM_001098729,NM_001098728,NM_001042490,	TCTGTTATTGGATTGTCTGCAGAAGTTCGCGTTTGCACTGTACTTGCTCGTGAAACTGGT	2966	Hs.607501	GO:0008094|GO:0008353|GO:0046872|GO:0003676|GO:0047485|GO:0005515|GO:0004672|GO:0003700|GO:0008135|GO:0008270|GO:0006281|GO:0002031|GO:0010467|GO:0006370|GO:0006289|GO:0000718|GO:0050434|GO:0009411|GO:0006363|GO:0006362|GO:0006368|GO:0006368|GO:0006360|GO:0006366|GO:0006366|GO:0006361|GO:0006367|GO:0006367|GO:0006351|GO:0006283|GO:0006412|GO:0016032|GO:0005675|GO:0005622|GO:0005654|GO:0005654|GO:…	NP_001506	General transcription factor IIH, polypeptide 2, 44kDa
ASHG19A3A015468	1689.74	349.898	887.608	678.348	709.223	979.435	620.45	374.496	1828.67	791.202	1508.56	864.32	10.5886	8.47694	9.89821	9.81289	9.47548	9.76029	9.35503	9.32613	10.3194	9.54492	10.299	9.52208	coding	NM_199280	FAM179A	RefSeq_coding	3564	chr2	+	29204163	29275094		ATTTCTGAAGCAATCTCTCCCATCTTACGACTTGCAGAAGGTCATGGCGGCCATTAAACA	165186	Hs.525977	GO:0005488	NP_954974	Family with sequence similarity 179, member A
ASHG19A3A037937	1116.39	493.329	852.664	575.253	781.766	823.067	764.554	529.787	2089.99	890.856	1492.49	1315.71	9.99365	8.98832	9.83562	9.60065	9.61457	9.51093	9.66359	9.79504	10.5349	9.73192	10.2854	10.1733	coding	NM_017443	POLE3	RefSeq_coding	2288	chr9	-	116169517	116173029		GCCCCGCCGAGTCAGCCACGCCTTCGTCTCCCACGCGCTGCGCCCGGCCGCGCCGTCACC	54107	Hs.108112	GO:0003887|GO:0016779|GO:0005515|GO:0043565|GO:0016740|GO:0006260|GO:0043966|GO:0005671|GO:0005622|GO:0005634	NP_059139	Polymerase (DNA directed), epsilon 3 (p17 subunit)
ASHG19A3A023010	93.3802	71.1326	51.045	72.1142	80.491	93.2042	66.9156	72.3724	84.4019	120.036	86.322	162.49	6.43784	6.01304	5.98017	6.57106	6.36203	6.31547	6.14871	6.97596	5.91466	6.77116	6.42357	6.94875	coding	NM_017699	SIDT1	RefSeq_coding	5021	chr3	+	113251217	113348421		TGTTTGGAAAAAATGACGTATGGTTCTGGGTCATCTTCTCTGCAATCCACGTTCTGGCCT	54847	Hs.591291	GO:0016021|GO:0016020	NP_060169	SID1 transmembrane family, member 1
ASHG19A3A013140	92.0376	129.619	62.8462	75.8119	98.2054	117.533	79.7965	73.5206	184.24	180.583	108.724	145.835	6.41719	6.93419	6.24728	6.64749	6.64461	6.6447	6.39658	6.99856	6.96705	7.35999	6.73	6.78499	coding	NM_003435	ZNF134	RefSeq_coding	2248	chr19	+	58125829	58133636		ATTTTAGAGTTATTTGAGAGCCCATATTTCACCTTGAGGAGGGTGCTGCTGCTGTGACAG	7693	Hs.469694	GO:0003677|GO:0046872|GO:0003700|GO:0008270|GO:0006355|GO:0006351|GO:0005622|GO:0005730|GO:0005634|GO:0005634	NP_003426	Zinc finger protein 134
ASHG19A3A031291	3256.28	2890.92	2886.8	2304.5	3946.09	2844.19	3053.45	2621.92	6375.94	3621.31	5424.48	5794.97	11.5627	11.5296	11.6043	11.4377	12.0841	11.2794	11.7702	11.8186	12.3402	11.7262	12.2422	12.2595	coding	NM_000595	LTA	RefSeq_coding	1386	chr6	+	31540092	31542098		GGCCTCGGTCCCTCCTGCACCTGCTGCCTGGATCCCCGGCCTGCCTGGGCCTGGGCCTTG	4049	Hs.36	GO:0005125|GO:0005515|GO:0005102|GO:0005164|GO:0007267|GO:0050830|GO:0006959|GO:0006917|GO:0048535|GO:0048147|GO:0044130|GO:0002876|GO:0002925|GO:0032729|GO:0042493|GO:0001666|GO:0032496|GO:0007584|GO:0007165|GO:0005576|GO:0005615|GO:0016020	NP_001153212	Lymphotoxin alpha (TNF superfamily, member 1)
ASHG19A3A012726	146.102	91.559	102.618	122.435	87.5897	113.442	104.661	87.129	265.551	161.707	218.278	242.653	7.08045	6.40378	6.92278	7.38726	6.47811	6.59626	6.79369	7.25114	7.47082	7.19914	7.64027	7.56455	coding	NM_199002	ARHGEF1	RefSeq_coding	3261	chr19	+	42388445	42411600		CCCGAGCGCGGAGGCTTCGGTTCCGGTGGCGGCGATGGCTTCTCTTTCCACCTGGAGCAG	9138	Hs.631550	GO:0005096|GO:0005089|GO:0005085|GO:0005515|GO:0007266|GO:0008283|GO:0050771|GO:0048011|GO:0050772|GO:0035023|GO:0050770|GO:0005737|GO:0005829|GO:0005622|GO:0005886|GO:0005886	NP_945353	Rho guanine nucleotide exchange factor (GEF) 1
ASHG19A3A046538	2091.82	3882.75	1033.21	5182.91	587.644	3282	1117.02	3471.17	716.627	2858.84	1119.51	6093.26	10.9108	11.9275	10.1133	12.4999	9.20147	11.4862	10.2355	12.1795	8.89216	11.3719	9.8638	12.325	coding	NM_031471	FERMT3	RefSeq_coding	2558	chr11	+	63974151	63991363		AAGACCAGATGTAGCTACAGGATGATGAAACATGGTTTCAAACGAGTTCTTTCTTGTTAC	83706	Hs.180535	GO:0005178|GO:0005515|GO:0007155|GO:0033622|GO:0007159|GO:0070527|GO:0033632|GO:0030054|GO:0042995|GO:0002102	NP_848537	Fermitin family member 3
ASHG19A3A031005	3191.46	5060.78	2808.98	2044.05	3120.44	5370.76	3566.34	5379.8	3799.38	5939.42	2980.34	5118.57	11.5286	12.2874	11.5621	11.2794	11.7145	12.1997	12.0176	12.7506	11.5078	12.435	11.3427	12.0818	coding	NM_016167	NOL7	RefSeq_coding	896	chr6	+	13615558	13621126		TTGCCAACAAGAGGTTACCAGTGAAAAGAGCTGCTGTCCAGTTTTTGAATAATGCTTGGG	51406	Hs.306242	GO:0005739|GO:0005730|GO:0005634	NP_057251	Nucleolar protein 7, 27kDa
ASHG19A3A001464	179.874	120.958	168.95	112.62	152.364	100.881	164.111	105.155	539.507	124.815	262.357	185.738	7.37981	6.83082	7.59746	7.26041	7.25007	6.43055	7.43969	7.53234	8.48316	6.83221	7.89318	7.15722	coding	NM_001045557	SLA	RefSeq_coding	3228	chr8	-	134048973	134115310		CTCAGGCAGCCCTGATGCTCCACCGGCTCTGGGCATCACCAGCGGCCCCAGGGAAAAAGA	6503	Hs.75367	GO:0005070|GO:0005737|GO:0005768	NP_006739	Src-like-adaptor
ASHG19A3A001474	488.665	677.81	227.826	604.391	485.651	554.004	441.83	521.173	1105.17	896.938	786.532	1266.87	8.79971	9.4824	8.00638	9.66118	8.93098	8.91402	8.87463	9.77216	9.52029	9.74226	9.38471	10.1245	coding	NM_001048230	ADORA1	RefSeq_coding	2782	chr1	+	203096835	203136533		GCTCTGCCAGCTTTGGTGACCTTGGGTGCTTGCCTCGTGCCCCTTGGTGCCCGTCTGCTG	134	Hs.77867	GO:0031683|GO:0001664|GO:0001609|GO:0032795|GO:0004629|GO:0005515|GO:0046982|GO:0001883|GO:0004872|GO:0000186|GO:0007267|GO:0050890|GO:0050965|GO:0008624|GO:0006954|GO:0007193|GO:0030147|GO:0043066|GO:0055118|GO:0008285|GO:0042323|GO:0014050|GO:0045822|GO:0046888|GO:0050728|GO:0002686|GO:0050995|GO:0070256|GO:0032900|GO:0032229|GO:0051967|GO:0045908|GO:0007399|GO:0006909|GO:0045777|GO:0045741|GO:…	NP_001041695	Adenosine A1 receptor
ASHG19A3A001089	418.655	321.474	364.997	349.713	423.495	348.418	383.094	285.887	1395.84	517.621	743.016	810.814	8.57393	8.34263	8.6505	8.93	8.72518	8.2303	8.66951	8.94931	9.87362	8.90894	9.30726	9.4157	coding	NM_001024463	PPIP5K1	RefSeq_coding	4983	chr15	-	43825659	43882430		GCATAATGCCCTTTCCCTACGTCAAGTGCCACCTATGGAAACCAGCCAGCCATACGAGGA
ASHG19A3A050175	172.058	110.469	401.14	174.228	287.048	195.14	282.938	185.401	373.626	151.805	555.156	263.704	7.31763	6.68632	8.78124	7.92045	8.16236	7.38224	8.22202	8.3493	7.94439	7.11225	8.89245	7.70137	coding	NM_001040443	PHF11	RefSeq_coding	1649	chr13	+	50069800	50103116		ATTCAAATTAAGACTAGACTGGAATCTGGAGCAGTGTGTGTGACAACCCCTCTCTGCACA	51131	Hs.369039	GO:0046872|GO:0008270|GO:0005634	NP_001035534	PHD finger protein 11
ASHG19A3A013047	757.333	646.577	640.187	655.033	680.743	766.643	572.923	511.047	1189.2	894.927	952.808	1223.13	9.43249	9.40716	9.42683	9.75971	9.41785	9.40463	9.2438	9.7388	9.62586	9.73855	9.64713	10.0683	coding	NM_006737	KIR3DL2	RefSeq_coding	1877	chr19	+	55361897	55378661		TTCCGTGCCCTGCCCTGCGTGTGGTCAAACTCAAGTGACCCACTGCTTGTTTCTGTCACA	3811	Hs.645228	GO:0030109|GO:0004872|GO:0006955|GO:0050776|GO:0005887|GO:0005886	NP_037421	Killer cell immunoglobulin-like receptor, three domains, long cytoplasmic tail, 1
ASHG19A3A022989	1591.69	223.791	1699.12	1509.75	1994.61	967.76	1613.51	381.316	2265.88	553.948	2020.56	565.985	10.5073	7.80095	10.8193	10.8897	11.0286	9.74127	10.7998	9.35055	10.6756	8.9989	10.7405	8.86324	coding	NM_001134437	PHLDB2	RefSeq_coding	5957	chr3	+	111451326	111695362		GAAAAGGAGAAACCTGTGTTAATGTGTCTTCCCAACATCCCACTCTCTTCAGCAATCGCT	90102	Hs.603252	GO:0005737|GO:0045111|GO:0005886	NP_665696	Pleckstrin homology-like domain, family B, member 2
ASHG19A3A011799	69.9388	69.7588	65.9191	39.8783	62.9754	86.8896	65.6248	59.8436	124.591	115.612	81.0299	127.194	6.01492	5.98358	6.31231	5.64302	6.00619	6.20855	6.11954	6.69308	6.43909	6.71319	6.34025	6.57826	coding	NM_001102603	ZNF160	RefSeq_coding	4336	chr19	-	53569867	53606687		GGGGACCCAGCTCTTCTTGCAGCCACTGGAAGCTGATCACCTGGAGTGAAGACCTCACAC	90338	Hs.655967	GO:0003677|GO:0046872|GO:0008270|GO:0030097|GO:0006355|GO:0005622|GO:0005634	NP_942596	Zinc finger protein 160
ASHG19A3A000709	288.22	552.268	129.531	56.4544	292.169	1359.08	189.138	30.392	245.48	337.286	110.589	836.483	8.04887	9.16091	7.24544	6.18477	8.18756	10.2193	7.639	5.69457	7.36293	8.27583	6.75231	9.4633	coding	NM_001002235	SERPINA1	RefSeq_coding	3199	chr14	-	94843084	94857029		TTGAGGAGAGCTTGAGGAGAGCAGGAAAGGACAATGCCGTCTTCTGTCTCGTGGGGCATC	5265	Hs.525557	GO:0002020|GO:0005515|GO:0004867|GO:0004867|GO:0006953|GO:0007596|GO:0006954|GO:0010951|GO:0030168|GO:0002576|GO:0030162|GO:0046687|GO:0034097|GO:0032355|GO:0001666|GO:0010288|GO:0032496|GO:0033986|GO:0014070|GO:0034014|GO:0005576|GO:0005576|GO:0005615|GO:0031093|GO:0005578	NP_001121179	Serpin peptidase inhibitor, clade A (alpha-1 antiproteinase, antitrypsin), member 1
ASHG19A3A033098	1391.59	171.201	1281.54	1657.22	1264.64	1543.16	1221.1	632.381	1409.23	603.993	1845.92	665.373	10.3001	7.37636	10.4074	11.0116	10.3239	10.3963	10.3618	10.0264	9.89	9.13649	10.6013	9.11915	coding	NM_014510	PCLO	RefSeq_coding	17095	chr7	-	82449795	82792197		GTGTTGGGCATGTGAATCTCCAAGTGCCTGTGTAATAAATAAAGTATCTTTATTTCATTC	27445	Hs.12376	GO:0005509|GO:0005544|GO:0005522|GO:0005215|GO:0008270|GO:0007010|GO:0016079|GO:0030054|GO:0005856|GO:0016020|GO:0045202|GO:0008021	NP_149015	Piccolo (presynaptic cytomatrix protein)
ASHG19A3A001265	124.56	140.383	102.318	39.5776	169.115	227.736	160.144	75.0774	252.508	160.739	143.434	210.549	6.85063	7.05963	6.91882	5.63107	7.40056	7.61263	7.40364	7.02756	7.40038	7.19114	7.09008	7.3541	coding	NM_001037663	EEF1B2	RefSeq_coding	900	chr2	+	207024317	207027653		CCCGTCATCTTCGGGAGCCGTGGAGCGTGGGGCGCCCACAATTTGCGCGCTCTCTTTCTG	1933	Hs.421608	GO:0005515|GO:0003746|GO:0044267|GO:0010467|GO:0006412|GO:0006414|GO:0006414|GO:0005829|GO:0005829|GO:0005853	NP_066944	Eukaryotic translation elongation factor 1 beta 2
ASHG19A3A039096	162.1	95.8134	232.638	100.651	170.474	115.246	181.867	118.158	335.923	121.334	229.286	178.757	7.23109	6.47438	8.03468	7.09245	7.41138	6.61999	7.58905	7.6955	7.79733	6.78737	7.70859	7.10099	coding	NM_006687	ACTL7A	RefSeq_coding	1433	chr9	+	111624602	111626035		AGAGAAATATGCTGAAATGCTGTTTGAAGCCTTCAACACCCCTGCAATGCACATCGCCTA	10881	Hs.123530	GO:0005200|GO:0005737|GO:0005856|GO:0001673|GO:0009434	NP_006678	Actin-like 7A
ASHG19A3A003923	205.689	99.5476	126.298	53.3623	181.121	86.6428	160.577	59.4043	230.481	111.939	103.561	119.721	7.56987	6.53562	7.20853	6.09994	7.49456	6.20509	7.40693	6.68067	7.28052	6.67141	6.66603	6.48476	coding	NM_001633	AMBP	RefSeq_coding	1450	chr9	-	116822409	116840752		GGAACCAGAGCCCATCTTAATCCCGAGAGTCCGGAGGGCTGTGCTACCCCAAGAAGAGGA	259	Hs.436911	GO:0019862|GO:0019855|GO:0046904|GO:0020037|GO:0030414|GO:0042803|GO:0004867|GO:0005215|GO:0007155|GO:0007565|GO:0042167|GO:0044419|GO:0046329|GO:0050777|GO:0018298|GO:0005576|GO:0005792|GO:0005886	NP_001624	Alpha-1-microglobulin/bikunin precursor
ASHG19A3A002118	213.979	142.171	189.156	146.016	228.559	190.767	162.003	143.358	367.716	146.442	253.854	232.989	7.62132	7.0773	7.74842	7.65787	7.8309	7.34769	7.42002	7.98663	7.92136	7.05503	7.84837	7.50596	coding	NM_001129826	CSAG3	RefSeq_coding	770	chrX	+	151927810	151928737	NM_001080848,	TCTCAACCCTGGCCCAGAAGCCCTATCAAAGTTCCCAAGACAACCCGGAAGGGAAAAGGG	728461	Hs.729845	GO:0042493	NP_004900	CSAG family, member 2
ASHG19A3A047841	4901.9	1790.13	4472.45	2380.9	3941.96	3173.11	3302.03	1941.13	7603.65	2614.61	6049.01	3493.1	12.2004	10.8654	12.2563	11.4775	12.081	11.437	11.9008	11.4519	12.5953	11.2321	12.3904	11.5562	coding	NM_001143885	PPP1R12A	RefSeq_coding	5582	chr12	-	80167343	80329235		GATTCCCGGGAGCCCCCAGCCCGACAGGACAACCTTCCTTCCCCGCTTCCTCCTTTCCAG	4659	Hs.49582	GO:0004721|GO:0005515|GO:0004871|GO:0006470|GO:0046822|GO:0007165|GO:0005737	NP_002471	Protein phosphatase 1, regulatory (inhibitor) subunit 12A
ASHG19A3A030332	291.072	426.254	228.359	118.291	314.584	343.365	338.317	139.867	517.134	491.635	256.269	585.393	8.06191	8.77151	8.01012	7.33347	8.2965	8.20764	8.48464	7.9419	8.42563	8.83696	7.86137	8.91161	coding	NM_004849	ATG5	RefSeq_coding	3244	chr6	-	106632353	106773695		AGTTGCACACACTAGGAGATCTCCTCAAAGAAGTTTGTCCTTCTGCTATTGATCCTGAAG	9474	Hs.486063	GO:0005515|GO:0000045|GO:0006914|GO:0001974|GO:0060047|GO:0043066|GO:0031397|GO:0032480|GO:0043687|GO:0042493|GO:0042311|GO:0055015|GO:0005776|GO:0005737|GO:0034045	NP_004840	ATG5 autophagy related 5 homolog (S. cerevisiae)
ASHG19A3A044238	124.773	109.065	101.694	108.881	103.941	127.699	87.4502	91.447	211.629	143.398	142.637	178.107	6.85312	6.66849	6.90815	7.20996	6.72402	6.76577	6.52865	7.32115	7.16414	7.02317	7.08099	7.09398	coding	NM_001168247	SLFNL1	RefSeq_coding	2133	chr1	-	41481268	41487397		TGACCTGAATGCCCCCAGGCCAACTGCCTCAAGGATTCCATTTGAGAAGATGCAGGCTGG	200172	Hs.194609	GO:0005524|GO:0000166	NP_659427	Schlafen-like 1
ASHG19A3A002793	2439.66	891.053	2678.38	632.785	3281.09	3160.66	2003.02	296.624	2961.07	1531.23	3053.34	712.881	11.1256	9.88761	11.4972	9.71522	11.7856	11.4297	11.1346	9.00056	11.114	10.5019	11.3729	9.22348	coding	NM_001145289	AKR7L	RefSeq_coding	2135	chr1	-	19592475	19600568		CTGGATCCTGCCCACTGTGTACCAGCTTCTGGAAGGAGCACCACTTCGAGGGCATTGCCC	246181	Hs.662342	GO:0016491|GO:0055114	NP_957704	Aldo-keto reductase family 7-like
ASHG19A3A051428	178.584	1201.96	173.925	38.5411	79.5734	102.356	114.034	81.2033	135.824	209.965	119.603	447.382	7.37237	10.3194	7.63572	5.58721	6.34504	6.45387	6.91553	7.14527	6.54863	7.58575	6.85256	8.5131	coding	NM_000956	PTGER2	RefSeq_coding	2494	chr14	+	52781015	52795320		GAACATGGTTTGACTCATCTTATATGGGAAACCATGTAGCAGTGAGTCATATCTTAATAT	5732	Hs.2090	GO:0004930|GO:0004957|GO:0004872|GO:0007186|GO:0042127|GO:0005887|GO:0005886|GO:0005886	NP_000947	Prostaglandin E receptor 2 (subtype EP2), 53kDa
ASHG19A3A020947	1207.86	172.385	1235.09	541.175	2576.73	297.832	823.435	244.024	1745.24	173.907	2172.79	90.4451	10.1097	7.38784	10.3618	9.52348	11.4096	8.01028	9.77431	8.72957	10.2421	7.30787	10.859	6.0469	coding	NM_004391	CYP8B1	RefSeq_coding	3950	chr3	-	42913684	42917633		GGGGCATGGTATTTTATTCATTTCTGACCTCCAATTCCCTAAGTGGAGATTAAATGTTAG	1582	Hs.447793	GO:0033778|GO:0009055|GO:0020037|GO:0046872|GO:0004497|GO:0019825|GO:0008397|GO:0006699|GO:0008206|GO:0055114|GO:0006805|GO:0005783|GO:0005789|GO:0016021|GO:0016020|GO:0005792	NP_004382	Cytochrome P450, family 8, subfamily B, polypeptide 1
ASHG19A3A052371	331.982	402.305	268.042	646.9	400.747	364.783	319.74	176.023	507.39	374.805	433.019	706.163	8.25596	8.68863	8.22896	9.7447	8.64333	8.30259	8.39109	8.27453	8.39335	8.42379	8.55994	9.20661	coding	NM_005979	S100A13	RefSeq_coding	743	chr1	-	153591279	153600715		TGGATGTCTTACCCCAAGCTGGGCCTTGCAGTACCTGTGGCTGGCTGTGCTGGTTGAGCC	6284	Hs.516505	GO:0050786|GO:0005509|GO:0005507|GO:0048602|GO:0008289|GO:0005515|GO:0042803|GO:0008270|GO:0050663|GO:0050703|GO:0043303|GO:0043123|GO:0015031|GO:0005737|GO:0005829|GO:0005576|GO:0005615|GO:0005634|GO:0048471	NP_005970	S100 calcium binding protein A13
ASHG19A3A033186	98.6933	286.424	77.3604	106.728	220.949	175.721	108.645	42.8636	98.028	69.0223	76.7267	79.7843	6.5134	8.17652	6.5304	7.17887	7.78372	7.23435	6.84647	6.19275	6.11861	5.96765	6.26857	5.85244	coding	NM_001160210	SLC25A13	RefSeq_coding	3207	chr7	-	95749532	95951459		CTTTGTTTATGGTAGCCTTTCAGCTGTTTGACAAAGCTGGCAAAGGAGAAGTAACTTTTG	10165	Hs.489190	GO:0015183|GO:0005313|GO:0015172|GO:0005488|GO:0005509|GO:0005215|GO:0006754|GO:0015813|GO:0015800|GO:0015810|GO:0005975|GO:0045333|GO:0006094|GO:0006006|GO:0043490|GO:0051592|GO:0055085|GO:0006810|GO:0005887|GO:0016020|GO:0005743|GO:0005743|GO:0005739	NP_055066	Solute carrier family 25, member 13 (citrin)
ASHG19A3A004507	136.111	132.823	112.796	124.313	136.393	162.337	114.115	112.975	206.807	147.962	149.734	185.247	6.97872	6.97387	7.05461	7.41059	7.09955	7.11615	6.91671	7.63466	7.12806	7.07116	7.14919	7.15376	coding	NM_006478	GAS2L1	RefSeq_coding	2557	chr22	+	29702996	29708774		TCCCCGGGGCCGCGGGATGAGCCAGCGATCCTGAACTGTGTTCCTGCCCACAGTGACTCG	10634	Hs.322852	GO:0007050|GO:0005737|GO:0005856	NP_689423	Growth arrest-specific 2 like 1
ASHG19A3A017224	73.0432	83.6188	48.1717	77.1303	69.4493	98.3879	58.2554	62.2737	92.1786	93.3435	69.3465	126.925	6.07797	6.26433	5.90311	6.67683	6.14845	6.39333	5.9466	6.75252	6.03901	6.40278	6.13569	6.57536	coding	NM_173821	C2orf85	RefSeq_coding	1798	chr2	+	242811885	242815482		AGGACTTCTGGATCTGGGTGTCCATGACCGTGTGCGTCTTCTGGCTGATGTGCATGTGTC	285093	Hs.376307	GO:0016021|GO:0016020	NP_776182	Chromosome 2 open reading frame 85
ASHG19A3A047727	6629.59	1295.84	4553.78	2610.73	3346.46	3426.79	2481.74	1003.71	5535.21	1788.81	5629.46	2632.85	12.6047	10.4162	12.2814	11.6026	11.8231	11.5485	11.4616	10.6141	12.1138	10.7191	12.2972	11.1739	coding	NM_032496	ARHGAP9	RefSeq_coding	2614	chr12	-	57866038	57873633		TCTGTCTTGAACCTGATTCTTTCTTCTTATCTCCTTCCTGTGTCCACCTCAAGACTCCCA	64333	Hs.437126	GO:0005096|GO:0005096|GO:0005515|GO:0051056|GO:0007165|GO:0007264|GO:0005829|GO:0005622	NP_115885	Rho GTPase activating protein 9
ASHG19A3A029930	206.978	212.779	268.165	306.347	215.75	220.041	141.804	949.221	268.485	428.908	217.764	117.232	7.57825	7.72289	8.22995	8.74463	7.74872	7.557	7.22663	10.5464	7.4865	8.62615	7.63751	6.45411	coding	NM_206922	CRIP3	RefSeq_coding	956	chr6	-	43273210	43276530		TAAAACTTGTGTTTATTGAATTTCAGCCTCTGTGGCTTCTTCAATAAAATGTTGGCTCCC	401262	Hs.653165	GO:0046872|GO:0008270|GO:0042098|GO:0005737	NP_996805	Cysteine-rich protein 3
ASHG19A3A003465	210.94	137.231	185.49	94.0471	154.098	570.736	132.885	47.3195	331.399	630.914	185.525	740.845	7.60086	7.02541	7.71899	6.98802	7.26598	8.95938	7.13548	6.34082	7.77975	9.20036	7.42452	9.27988	coding	NM_001168325	TESC	RefSeq_coding	958	chr12	-	117476729	117537251		TGAGTGGAGATCAGCCTACCATTCGGAACCTGCGCAAGGGACCCAGTGGCCTGGCTGATG	54997	Hs.525709	GO:0005509|GO:0000287|GO:0019212|GO:0005515|GO:0008584|GO:0008285|GO:0010628|GO:0043193|GO:0045654|GO:0033628|GO:0005737|GO:0030027|GO:0005634|GO:0005634|GO:0005886|GO:0001726	NP_060369	Tescalcin
ASHG19A3A012712	83.9985	60.0371	75.4682	70.1406	60.9552	72.5842	62.3527	56.2549	60.383	92.4317	61.8663	77.6572	6.28536	5.75235	6.49519	6.52667	5.96173	5.94092	6.04087	6.59988	5.44641	6.38975	5.98817	5.81248	coding	NM_001098825	TMEM91	RefSeq_coding	751	chr19	+	41869870	41889985		AGAGGAGAAAGCGGCAACCGGGGTTGTAGTTCATGGGCTTGACTGCTTCTTTTCTCCGCG	641649	Hs.709417	GO:0009607|GO:0016021|GO:0016020	NP_001092295	Transmembrane protein 91
ASHG19A3A036572	1807.11	3503.02	1180.39	667.616	2084.65	3181.04	1671.68	1181.94	3106.88	3862.64	1460.62	3070.56	10.6885	11.79	10.292	9.79013	11.1019	11.4411	10.8505	10.8131	11.2022	11.8237	10.2515	11.3815	coding	NM_001135694	VDAC3	RefSeq_coding	1461	chr8	+	42249345	42263413		TTGAAACATCCATAAACCTTGCTTGGACAGCTGGGAGTAACAACACCCGTTTTGGCATTG	7419	Hs.699301	GO:0000166|GO:0015288|GO:0005515|GO:0008308|GO:0015853|GO:0044070|GO:0055085|GO:0016020|GO:0005741|GO:0005739|GO:0046930	NP_005653	Voltage-dependent anion channel 3
ASHG19A3A002112	92.2189	77.1467	134.768	56.6627	138.82	72.4607	94.4453	74.7288	198.469	119.567	207.243	104.527	6.42098	6.13513	7.3045	6.19166	7.12034	5.93894	6.64221	7.0208	7.07266	6.7664	7.56944	6.27726	coding	NM_001128932	CYP4F11	RefSeq_coding	2973	chr19	-	16023179	16045676		GCAAAGACCTCCTAGCAGAGGGGGAGAGGAGGGATGCCGCAGCTGAGCCTGTCCTGGCTG	57834	Hs.187393	GO:0070330|GO:0009055|GO:0020037|GO:0046872|GO:0004497|GO:0004497|GO:0016705|GO:0006954|GO:0055114|GO:0055114|GO:0006805|GO:0005783|GO:0005789|GO:0016021|GO:0016020|GO:0005792	NP_067010	Cytochrome P450, family 4, subfamily F, polypeptide 11
ASHG19A3A046861	106.463	63.5818	144.177	42.7664	123.576	60.8119	77.999	65.4024	214.162	63.7901	170.582	58.0242	6.61938	5.83907	7.39201	5.75082	6.96651	5.67743	6.3638	6.82265	7.18156	5.84855	7.31458	5.35739	coding	NM_033395	KIAA1731	RefSeq_coding	8044	chr11	+	93394815	93463522		AATAGTTCTACCTACCATCATCTTCACACTTTTGTGAATAGAGAGACAGACACAAAACGG	85459	Hs.458418		NP_203753	KIAA1731
ASHG19A3A022120	171.578	297.312	103.514	102.24	231.686	193.404	138.204	61.3698	225.381	145.551	99.7846	238.898	7.31302	8.22758	6.93358	7.1146	7.85189	7.36752	7.19336	6.73132	7.24964	7.04443	6.61884	7.54138	coding	NM_018385	LSG1	RefSeq_coding	3589	chr3	-	194361517	194393206		AATCAACACCATCATGGGCAACAAGAAAGTATCTGTGTCTGCCACACCTGGTCACACAAA	55341	Hs.728879	GO:0005525|GO:0016787|GO:0000166|GO:0051168|GO:0015031|GO:0015030|GO:0005737|GO:0005783|GO:0005622|GO:0005634	NP_060855	Large subunit GTPase 1 homolog (S. cerevisiae)
ASHG19A3A002162	123.753	99.845	99.5563	77.076	67.9648	82.7909	116.727	106.256	269.84	143.809	211.361	172.183	6.84229	6.54034	6.87945	6.6753	6.11544	6.14051	6.94959	7.55012	7.49539	7.02682	7.59814	7.03968	coding	NM_001130147	CCDC77	RefSeq_coding	2359	chr12	+	498515	551804		AACGACTCCACGCAGCTCGCCCTTGGTTATTTGGACAAGAGGCACATTGACCCAATTTGG	84318	Hs.631656		NP_115734	Coiled-coil domain containing 77
ASHG19A3A014230	1399.14	2834.13	1371.83	3270.36	1558.23	2470.44	1283.38	2545.84	1850.99	2593.41	1500.25	1812.41	10.3129	11.5087	10.4978	11.8931	10.6413	11.0734	10.4296	11.7749	10.3452	11.2208	10.2917	10.6532	coding	NM_080605	B3GALT6	RefSeq_coding	2793	chr1	+	1167628	1170418		AGACCCCCAACAGGAAGAGTCTAAAAATCCAGTTTGCAACCACTTCTGACCTACAAAAAA	126792	Hs.284284	GO:0008499|GO:0035250|GO:0047220|GO:0016757|GO:0006024|GO:0006486|GO:0005794|GO:0032580|GO:0005797|GO:0016021|GO:0016020	NP_542172	UDP-Gal:betaGal beta 1,3-galactosyltransferase polypeptide 6
ASHG19A3A026733	216.696	359.637	206.714	281.672	189.701	253.741	210.831	288.521	308.136	373.023	233.105	269.168	7.63675	8.52007	7.87463	8.61839	7.56029	7.77829	7.79824	8.96321	7.67798	8.41558	7.73289	7.73127	coding	NM_000997	RPL37	RefSeq_coding	1586	chr5	-	40831429	40835387		CTTCAGAACATTCACTTATAAAGAAACCCTGCTGATTAAATCTCTCTTGGGCTTCCTCCC	6167	Hs.80545	GO:0003723|GO:0046872|GO:0005515|GO:0019843|GO:0003735|GO:0044267|GO:0031018|GO:0010467|GO:0006412|GO:0006414|GO:0006415|GO:0019058|GO:0016032|GO:0019083|GO:0005829|GO:0005829|GO:0022625|GO:0005622|GO:0005840	NP_000988	Ribosomal protein L37
ASHG19A3A015604	87.255	48.7323	51.9548	76.1073	53.6515	71.4219	55.3946	60.3805	104.332	64.4518	76.7915	96.4942	6.341	5.43049	6.00281	6.65418	5.79264	5.91519	5.87598	6.70957	6.20065	5.86295	6.26957	6.14845	coding	NM_001430	EPAS1	RefSeq_coding	5184	chr2	+	46524540	46613842		AAACTCAGAAAAGTGACTCCTTTTCCAGGGAAAAAGGAACTTGGGTTCCCTTCTCTCCGT	2034	Hs.468410	GO:0003677|GO:0035035|GO:0005515|GO:0046982|GO:0043565|GO:0003700|GO:0003705|GO:0004871|GO:0003713|GO:0008134|GO:0030528|GO:0001525|GO:0030154|GO:0007275|GO:0048625|GO:0045944|GO:0006355|GO:0001666|GO:0007165|GO:0006366|GO:0005634|GO:0005667|GO:0005667	NP_001421	Endothelial PAS domain protein 1
ASHG19A3A045268	1977.07	2815.35	2022.83	2414.73	2195.37	2890.89	1525.36	2143.36	2093.58	3069.13	1951.98	1529.09	10.8267	11.5	11.0774	11.4972	11.1761	11.3044	10.7082	11.5706	10.5406	11.4744	10.693	10.3984	coding	NM_022830	TUT1	RefSeq_coding	2844	chr11	-	62342516	62359109		ATCTCAAGTGAAGACATGGCCCCTGAAGGGCAATAAAGCTGCTAGTTTATTAATACAGTC	64852	Hs.728983	GO:0005524|GO:0003723|GO:0050265|GO:0019899|GO:0003730|GO:0046872|GO:0000166|GO:0016779|GO:0004652|GO:0005515|GO:0016740|GO:0008270|GO:0071044|GO:0006379|GO:0006378|GO:0006378|GO:0016180|GO:0005622|GO:0005847|GO:0016607|GO:0005730|GO:0005634	NP_073741	Terminal uridylyl transferase 1, U6 snRNA-specific
ASHG19A3A048537	1184.32	671.476	1380.87	650.111	1406.09	700.85	1391.59	562.761	1606.37	882.553	1315.81	698.322	10.0761	9.46693	10.5043	9.74974	10.4932	9.27377	10.5745	9.86495	10.1092	9.71931	10.0905	9.19279	coding	NM_017842	SLC48A1	RefSeq_coding	3034	chr12	+	48166966	48176535	BC002759,	TCACTTCTGGGGGGCCCTTTCAGAGGCACTTTTAAAGCAAATAAAACATTTATTGTTCAG	55652	Hs.438867	GO:0006810|GO:0005768|GO:0010008|GO:0016021|GO:0005765|GO:0016020	NP_060312	Solute carrier family 48 (heme transporter), member 1
ASHG19A3A020384	4395.33	9550.7	6024.41	33847.1	7081.56	51711.2	6375.91	25754.6	6969.59	17625	9718.41	29915.7	12.0296	13.1326	12.6831	15.0877	12.9789	15.3899	12.9089	14.5774	12.4765	13.9475	13.1417	14.5433	coding	NM_002133	HMOX1	RefSeq_coding	1550	chr22	+	35777086	35790194		GTTTAACGGCACTGTGGCCTTGGTCTAACTTTTGTGTGAAATAATAAACAACATTGTCTG	3162	Hs.517581	GO:0019899|GO:0020037|GO:0004392|GO:0004392|GO:0004392|GO:0046872|GO:0016491|GO:0004630|GO:0042803|GO:0004871|GO:0008630|GO:0001525|GO:0006916|GO:0008219|GO:0006879|GO:0031670|GO:0001935|GO:0034101|GO:0007588|GO:0042167|GO:0042167|GO:0006788|GO:0007243|GO:0055072|GO:0055072|GO:0034383|GO:0002686|GO:0032764|GO:0043305|GO:0043524|GO:0043433|GO:0048662|GO:0006778|GO:0043123|GO:0045766|GO:0045768|GO:…	NP_002124	Heme oxygenase (decycling) 1
ASHG19A3A051498	168.8	344.615	121.677	200.715	252.666	206.44	241.357	245.728	257.059	314.115	211.47	311.528	7.28781	8.45281	7.1585	8.12591	7.97705	7.46853	7.99454	8.7379	7.42589	8.17385	7.59904	7.95101	coding	NM_153811	SLC38A6	RefSeq_coding	1662	chr14	+	61447831	61519259		TTACAAGAATAATATACCCCTAGTTGCAAGAATGAATTATTCCGGAAGACACCCTGGATG	145389	Hs.200738	GO:0006865|GO:0006811|GO:0006814|GO:0016021|GO:0016020	NP_722518	Solute carrier family 38, member 6
ASHG19A3A051747	513.18	221.2	415.452	283.571	397.971	446.971	309.545	140.405	662.196	351.947	576.848	539.676	8.87463	7.78061	8.83445	8.62686	8.63245	8.59737	8.34705	7.94896	8.7759	8.33867	8.94564	8.79448	coding	NM_000623	BDKRB2	RefSeq_coding	4197	chr14	+	96671134	96710666		AGTCCAAATGTTCTCTCCCTGGAAGATATCAATGTTTCTGTCTGTTCGTGAGGACTCCGT	624	Hs.726620	GO:0004930|GO:0004947|GO:0004435|GO:0002020|GO:0005515|GO:0046982|GO:0004872|GO:0031702|GO:0007186|GO:0050482|GO:0008015|GO:0007166|GO:0007204|GO:0006954|GO:0043066|GO:0045776|GO:0008285|GO:0033137|GO:0043114|GO:0019229|GO:0042493|GO:0009651|GO:0006939|GO:0007169|GO:0005768|GO:0005887|GO:0005886|GO:0005886|GO:0005886	NP_000614	Bradykinin receptor B2
ASHG19A3A005747	63.1165	75.6195	65.1667	88.0594	62.8876	53.8498	61.5194	53.3014	95.6935	113.658	68.3717	243.948	5.8628	6.10356	6.29674	6.88499	6.00454	5.50324	6.02431	6.51852	6.0873	6.69004	6.11768	7.57186	coding	NM_080813	COL13A1	RefSeq_coding	2956	chr10	+	71561643	71718903	NM_080805,NM_080802,NM_080801,	CTCCAGCCAAATAATTGCCCTGAAGGGCGAACAGAGCCAGGCCAGCATCCAAGGTCCACC
ASHG19A3A048276	125.578	89.0895	87.3115	70.7114	179.871	204.758	178.39	79.1853	254.207	155.033	235.183	223.067	6.8624	6.36486	6.69625	6.53919	7.48695	7.45656	7.56155	7.10657	7.40987	7.13995	7.74493	7.43991	coding	NM_001164093	COPS7A	RefSeq_coding	2054	chr12	+	6833448	6841039		AATTTTAGACCGCTCCATGTCTGATTCCTCACCGCAGAACCGACTTAGTGCCTTTACAAT	50813	Hs.530823	GO:0005737|GO:0005730|GO:0005634|GO:0008180	NP_057403	COP9 constitutive photomorphogenic homolog subunit 7A (Arabidopsis)
ASHG19A3A025650	595.056	646.071	530.103	466.986	578.437	1120.12	569.159	713.473	734.5	1188.22	822.771	766.843	9.09026	9.4059	9.16387	9.32544	9.1779	9.94658	9.23502	10.1902	8.9277	10.136	9.44416	9.32544	coding	NM_020368	UTP3	RefSeq_coding	2088	chr4	+	71554195	71556267		GTGTAACTTTTCACATAAAGAGAATGCATCTTTGACAGTTATCTTATTTGTAAGGCAGCC	57050	Hs.322901	GO:0003674|GO:0007420|GO:0016568|GO:0016458|GO:0007275|GO:0005730|GO:0005634	NP_065101	UTP3, small subunit (SSU) processome component, homolog (S. cerevisiae)
ASHG19A3A034805	198.968	126.276	124.663	49.1108	230.363	281.73	173.279	33.1374	179.697	185.347	234.009	162.654	7.52339	6.89412	7.18832	5.96485	7.84372	7.92456	7.5206	5.81876	6.93367	7.40117	7.73755	6.95061	coding	NM_019606	MEPCE	RefSeq_coding	2769	chr7	+	100027528	100031740		TTCCAGTATGGGAATTATTGCAAATACTATGGGTACCGCAATCCTTCCTGTGAGGATGGG	56257	Hs.178011	GO:0008168|GO:0016740	NP_062552	Methylphosphate capping enzyme
ASHG19A3A042986	1311.82	724.165	1571.05	815.623	1417.71	907.807	1329.27	689.295	3299.78	938.388	1931.57	1478.97	10.2208	9.57838	10.6993	10.066	10.5043	9.65229	10.4924	10.1409	11.2939	9.80666	10.6793	10.3441	coding	NM_001007271	DUSP13	RefSeq_coding	1788	chr10	-	76854191	76868970		TGATTTTGACATCAGTGCCTACTTCTCCTCTGCGGCTGACTTCATCCACCGTGCCCTCAA	51207	Hs.178170	GO:0016787|GO:0004725|GO:0008138|GO:0008138|GO:0007126|GO:0006470|GO:0006470|GO:0007283|GO:0005737	NP_057448	Dual specificity phosphatase 13
ASHG19A3A051660	96.2418	123.108	91.8789	120.398	89.6322	117.665	85.9916	77.2883	138.61	134.027	86.5994	201.686	6.47933	6.85633	6.77062	7.3592	6.51138	6.6463	6.50389	7.07054	6.57553	6.92923	6.42799	7.28735	coding	NM_004796	NRXN3	RefSeq_coding	6163	chr14	+	78870092	80330758		TGCTTTCTCAGGGATATGCACTCTGCACTTCCATTCCTGCAGTGAAATTAACTCGAGCTT	9369	Hs.368307	GO:0046872|GO:0004872|GO:0007411|GO:0007155|GO:0016021|GO:0005887|GO:0016020	NP_620426	Neurexin 3
ASHG19A3A004234	68.3731	87.3669	60.7334	71.2213	63.9526	68.6831	74.2138	47.8428	96.3097	89.0475	62.0255	96.6693	5.98119	6.33555	6.20335	6.55061	6.02784	5.85831	6.29487	6.35701	6.09612	6.33412	5.99273	6.15177	coding	NM_004086	COCH	RefSeq_coding	2558	chr14	+	31343740	31359822		GCGCAGCCGGGTGGATCTCGAGCAGGTGTGAGCAGCCTATCAGTCACCATGTCCGCAGCC	1690	Hs.21016	GO:0007605|GO:0005576|GO:0005578	NP_004077	Coagulation factor C homolog, cochlin (Limulus polyphemus)
ASHG19A3A036985	285.762	233.353	283.122	209.472	377.76	318.148	241.776	133.972	747.527	293.306	385.455	362.828	8.03404	7.86433	8.30826	8.19161	8.5555	8.10653	7.99622	7.87821	8.95686	8.07239	8.40624	8.17759	coding	NM_030895	ZNF696	RefSeq_coding	4686	chr8	+	144373558	144382118		AGTTGTCAAATTTCCCACCGGCCCAGCTCATCGAGCTTCTTCCCAGCTGTGAACAGGAGG	79943	Hs.512740	GO:0003677|GO:0046872|GO:0008270|GO:0005622|GO:0005634	NP_112157	Zinc finger protein 696
ASHG19A3A000583	116.296	95.5462	116.239	77.025	117.516	94.5351	102.796	65.8705	190.332	131.413	148.603	130.943	6.75078	6.46875	7.09485	6.67383	6.89514	6.33302	6.76606	6.83447	7.01132	6.90314	7.13898	6.62842	coding	NM_001081755	ELN	RefSeq_coding	3423	chr7	+	73442426	73484234	NM_000501,	TGCAGCCGCTAAAGCAGCTAAATACGGTGCTGCTGGCCTTGGAGGTGTCCTAGGGGGTGC	2006	Hs.647061	GO:0030023|GO:0005201|GO:0005515|GO:0008015|GO:0008283|GO:0009887|GO:0007585|GO:0005576|GO:0005578	NP_001075224	Elastin
ASHG19A3A028366	1741.31	104.189	1656.07	257.978	2896.7	1704.49	1311.26	219.169	2705.37	307.336	1900.66	165.905	10.6319	6.60163	10.7732	8.50088	11.5933	10.5497	10.4669	8.57989	10.9554	8.14449	10.6449	6.98313	coding	NM_153217	TMEM174	RefSeq_coding	1758	chr5	+	72469022	72470968		ACACCATCTACCCTCAAGATAACTCTGCATTTGTGGTTGATGAGGGCTGCCTTTCTTTCA	134288	Hs.508588	GO:0016021|GO:0016020	NP_694949	Transmembrane protein 174
ASHG19A3A005722	288.048	93.9729	216.655	141.463	252.754	135.643	230.959	67.5125	316.188	84.1835	403.489	122.401	8.04786	6.4445	7.94255	7.60698	7.97776	6.85406	7.92923	6.86998	7.71591	6.25378	8.46374	6.521	coding	NM_080590	CAPS	RefSeq_coding	1532	chr19	+	5914192	5916221		CCGCGGGGTGTACAGTGGCCGTGCCCACCCCAAGGTCACACTGGCGGAATTCCAGGACTA	828	Hs.584744	GO:0005509|GO:0035556|GO:0005737	NP_542157	Calcyphosine
ASHG19A3A040590	740.673	1131.94	698.896	1024.71	844.075	1210.27	776.264	989.371	1358.66	1594.62	725.319	933.051	9.39721	10.2287	9.55039	10.3679	9.73092	10.0513	9.6886	10.5962	9.83084	10.5553	9.26815	9.63631	coding	NM_014235	UBL4A	RefSeq_coding	2318	chrX	-	153712057	153714932		TATGAAAGTGAAAAGTCCAGTGGTATTGGCATTGGCAGCAGGTGAGCAATTTCACCCAGT	8266	Hs.76480	GO:0019787|GO:0006464|GO:0071816|GO:0006810|GO:0071818|GO:0005737|GO:0005829	NP_055050	Ubiquitin-like 4A
ASHG19A3A037762	511.35	574.462	371.233	284.829	647.824	815.857	601.466	211.675	871.439	823.163	416.628	709.778	8.8687	9.22366	8.67522	8.63225	9.34582	9.50057	9.30933	8.5305	9.17768	9.6086	8.50648	9.21516	coding	NM_007001	SLC35D2	RefSeq_coding	1643	chr9	-	99082988	99145992		ATTCACTCAACATCATCCTCAGTGTCTTTGCCATTATTCTCGGGGCTTTCATAGCAGCTG	11046	Hs.494556	GO:0005338|GO:0005338|GO:0008150|GO:0015780|GO:0015780|GO:0055085|GO:0005794|GO:0000139|GO:0005575|GO:0016021|GO:0016020	NP_008932	Solute carrier family 35, member D2
ASHG19A3A000955	200.35	238.537	123.022	134.37	157.869	280.618	135.872	152.461	198.8	191.985	164.587	228.3	7.53286	7.89683	7.17161	7.52793	7.29965	7.91842	7.16537	8.07377	7.07413	7.45303	7.26957	7.47513	coding	NM_001012514	ITM2C	RefSeq_coding	1982	chr2	+	231729620	231743962		CGAGATCCTGCTGACGCCGGCTAGGCTGGCCCGAGATAACTTCTTCCGCTGTGGTGTGCT	81618	Hs.111577	GO:0005524|GO:0001540|GO:0005515|GO:0012502|GO:0010977|GO:0030182|GO:0030182|GO:0005794|GO:0016021|GO:0005765|GO:0005764|GO:0005764|GO:0016020|GO:0048471	NP_112188	Integral membrane protein 2C
ASHG19A3A040608	158.643	147.094	100.356	118.668	162.583	171.804	127.974	110.289	232.927	179.334	172.544	231.894	7.19787	7.13345	6.89054	7.33777	7.34147	7.20337	7.08395	7.60162	7.29251	7.34891	7.32947	7.49878	coding	NM_001162936	LOC100132963	RefSeq_coding	1028	chrX	-	154051623	154062937		TCTCCTTTGCCTTTGTCTGCCTTGGGAATACAAGAAAAAACAGGATCGAAACCACGCTCA	100132963	Hs.220762	GO:0016021|GO:0005886	NP_001156408	Hypothetical protein LOC100132963
ASHG19A3A048663	181.357	98.0953	237.912	127.345	203.132	148.447	210.462	129.229	418.819	77.6706	267.203	124.114	7.39075	6.51025	8.06424	7.44678	7.66053	6.9851	7.79511	7.82684	8.1123	6.13609	7.91486	6.54161	coding	NM_004503	HOXC6	RefSeq_coding	1681	chr12	+	54422193	54424606		TAGACCGACCAGGTAAAGGCAAAGGGATGAATTCCTACTTCACTAACCCTTCCTTATCCT	3221	Hs.549040	GO:0043565|GO:0003700|GO:0030528|GO:0009952|GO:0051216|GO:0048562|GO:0007275|GO:0006355|GO:0006351|GO:0005634	NP_705897	Homeobox C4
ASHG19A3A038367	426.081	113.036	189.428	95.5485	235.335	135.851	236.109	91.0695	548.795	163.93	208.294	205.843	8.60054	6.7257	7.75046	7.01276	7.87422	6.85681	7.95951	7.31575	8.50708	7.22032	7.57656	7.31851	coding	NM_000550	TYRP1	RefSeq_coding	2876	chr9	+	12693385	12710265		TTTGTCCTCCTGCACACCTTCACAGATGCAGTCTTTGATGAATGGCTGAGGAGATACAAT	7306	Hs.270279	GO:0005507|GO:0046872|GO:0016716|GO:0005515|GO:0046982|GO:0042803|GO:0043438|GO:0042438|GO:0030318|GO:0032438|GO:0055114|GO:0043473|GO:0030669|GO:0010008|GO:0016021|GO:0042470|GO:0033162|GO:0016020	NP_000541	Tyrosinase-related protein 1
ASHG19A3A043413	1574.61	1128.71	1376.7	523.528	2323.17	1568.89	1455.77	802.62	2143.17	1211.27	1915.48	1811.77	10.4958	10.2258	10.5027	9.48046	11.2596	10.4145	10.6345	10.3419	10.5843	10.1663	10.6625	10.6527	coding	NM_031280	MRPS15	RefSeq_coding	965	chr1	-	36921361	36930040		AAGCAAGAACAGTTTATGAAGAAGATTGTTGCAAACCCAGAGGACACCAGATCCCTGGAG	64960	Hs.352839	GO:0003735|GO:0006412|GO:0005622|GO:0005763|GO:0005739|GO:0031965|GO:0005840	NP_112570	Mitochondrial ribosomal protein S15
ASHG19A3A029219	98.7885	92.7112	81.3942	88.7848	149.146	136.98	96.6657	67.1368	128.948	99.7025	104.332	129.768	6.51424	6.42275	6.60327	6.9004	7.22021	6.86932	6.67339	6.86142	6.48634	6.50732	6.67692	6.61253	coding	NM_012279	ZNF346	RefSeq_coding	3089	chr5	+	176449696	176493743		AAGAACCAATGTCTCTTCACCAACACCCAGTGTAAGGTTTGCTGCGCCTTGCTTATTTCT	23567	Hs.484259	GO:0003725|GO:0046872|GO:0008270|GO:0006915|GO:0005737|GO:0005622|GO:0005730|GO:0005634	NP_036411	Zinc finger protein 346
CUST_1_PI426247286	50.6912	44.3235	51.533	39.6745	53.9218	46.5209	48.8068	38.3334	60.4843	51.6048	50.1018	57.566	5.55347	5.2984	5.99273	5.63446	5.79961	5.28779	5.69583	6.03543	5.44806	5.53463	5.70736	5.34402	coding	NM_017410_intron1+	NM_017410	HOX cluster	5356	chr12	+	54333426	54338783		ATAACAGAAATGAAAAGCATTAGGGAGCTTCACTATGCAGTGCAATCCTCTGGCCCCGTT
ASHG19A3A011031	2596.86	2359.03	3055.88	3628.32	3358.92	2680.51	2615.56	3333.23	2506.66	2174.11	3811.96	2882.48	11.2239	11.2537	11.6967	12.0243	11.8275	11.1977	11.5426	12.1281	10.8342	10.9897	11.7318	11.3006	coding	NM_001031734	FDX1L	RefSeq_coding	852	chr19	-	10420890	10426691		AATCAGGGTTTGAGTAGGAGTGGACTCATATTGGAGCTGCAATAAATCGATAACACAGGC	112812	Hs.654865	GO:0051537|GO:0009055|GO:0046872|GO:0022900|GO:0006810|GO:0005759|GO:0005739	NP_001026904	Ferredoxin 1-like
ASHG19A3A040962	405.267	289.938	597.68	340.228	655.036	393.834	378.136	206.676	1278.04	492.873	1131.5	599.741	8.53195	8.19414	9.32654	8.88816	9.36322	8.41425	8.6505	8.49705	9.73482	8.83967	9.87362	8.9447	coding	NM_181532	ERAS	RefSeq_coding	1266	chrX	+	48687282	48688548		ATTAAATAAATGGTGTTTTGGGTTTCAAAGCTGCCTCCATGCCGAGTGTTGTGTGGGTGG	3266	Hs.447330	GO:0005525|GO:0003924|GO:0000166|GO:0007165|GO:0007264|GO:0005622|GO:0005886	NP_853510	ES cell expressed Ras
ASHG19A3A025547	192.521	144.589	199.897	151.19	188.879	181.335	161.966	116.283	231.241	171.064	198.274	202.603	7.47752	7.10506	7.82793	7.70781	7.55461	7.27905	7.41943	7.67497	7.2841	7.28295	7.51233	7.29471	coding	NM_006452	PAICS	RefSeq_coding	3350	chr4	+	57301914	57327534		AGTAACGGACTTAACCTCATTTCTCTTTCAGAGCATTTAGCCTTCATATGCCCTTCCCTG	10606	Hs.518774	GO:0005524|GO:0042802|GO:0016874|GO:0016829|GO:0000166|GO:0004638|GO:0004639|GO:0005515|GO:0006189|GO:0055086|GO:0009113|GO:0006144|GO:0006164|GO:0009168|GO:0005829	NP_006443	Phosphoribosylaminoimidazole carboxylase, phosphoribosylaminoimidazole succinocarboxamide synthetase
ASHG19A3A012485	226.049	151.615	259.073	121.962	275.103	170.001	187.08	137.309	429.026	233.08	428.634	305.284	7.6963	7.18584	8.1799	7.38194	8.09645	7.18745	7.62132	7.91704	8.14579	7.74443	8.54381	7.91685	coding	NM_057182	CCNE1	RefSeq_coding	1787	chr19	+	30303560	30315218	NM_001238,	TGAGCAACACCCTCTTCTGCAGCCAAAAATGCGAGCAATTCTTCTGGATTGGTTAATGGA	898	Hs.244723	GO:0050681|GO:0016538|GO:0016301|GO:0005515|GO:0032403|GO:0003713|GO:0006270|GO:0000082|GO:0000082|GO:0030521|GO:0001547|GO:0051301|GO:0031670|GO:0001889|GO:0000278|GO:0031100|GO:0045597|GO:0045893|GO:0006468|GO:0051726|GO:0000083|GO:0051412|GO:0034097|GO:0042493|GO:0032355|GO:0045471|GO:0051597|GO:0010243|GO:0032570|GO:0014074|GO:0033197|GO:0005813|GO:0000307|GO:0005737|GO:0005829|GO:0005730|GO:…	NP_476530	Cyclin E1
ASHG19A3A033283	436.491	554.671	324.534	266.334	286.57	372.479	215.078	2091.82	124.985	673.396	372.716	160.366	8.63395	9.16857	8.49237	8.54453	8.1586	8.33208	7.82332	11.541	6.44327	9.29945	8.36162	6.92709	coding	NM_014343	CLDN15	RefSeq_coding	1258	chr7	-	100875373	100881116		CCCCGCACGTTTGTATTGTGTATAAATACATTCATTAATAAATGCATATTGTGACCGTTC	24146	Hs.38738	GO:0042802|GO:0005198|GO:0016338|GO:0034329|GO:0045216|GO:0070830|GO:0030054|GO:0016021|GO:0005886|GO:0005923	NP_055158	Claudin 15
ASHG19A3A044712	168.643	142.835	128.124	82.5536	140.779	158.64	86.041	76.9747	184.127	154.456	176.727	166.63	7.28631	7.08343	7.22979	6.78563	7.13742	7.08499	6.50515	7.06404	6.96593	7.13446	7.36341	6.99065	coding	NM_001135054	SIGIRR	RefSeq_coding	1761	chr11	-	405715	414999		TTGCTCCCAAAGGCGCACCAATGACCAACATTTGCCCCCCGGAGGAAAGAACTGGAACCA	59307	Hs.501624	GO:0005515|GO:0004888|GO:0006953|GO:0045087|GO:0045079|GO:0001960|GO:0031665|GO:0043433|GO:0007165|GO:0016021|GO:0016020	NP_068577	Single immunoglobulin and toll-interleukin 1 receptor (TIR) domain
ASHG19A3A034142	342.028	661.895	249.56	98.5632	658.993	681.63	535.047	71.3328	933.266	680.512	363.488	2318.31	8.29515	9.4464	8.12842	7.06261	9.37181	9.23198	9.14191	6.95324	9.27822	9.31706	8.32692	10.9831	coding	NM_002047	GARS	RefSeq_coding	2759	chr7	+	30634180	30673646		ACATGGAGAATGAGATGGCCCATTATGCCTGTGACTGTTGGGATGCAGAATCCAAAACAT	2617	Hs.404321	GO:0005524|GO:0004820|GO:0004820|GO:0016874|GO:0000166|GO:0046983|GO:0008219|GO:0015966|GO:0010467|GO:0006426|GO:0045055|GO:0006418|GO:0005737|GO:0005829|GO:0005759|GO:0005739|GO:0005625|GO:0030141	NP_002038	Glycyl-tRNA synthetase
ASHG19A3A045302	3541.17	2933.64	2885.99	2291.04	2452.94	3792.36	2199.21	2024.18	4689.21	3970.62	4688.34	4109.44	11.694	11.5493	11.6036	11.4271	11.3367	11.6903	11.2761	11.5004	11.8392	11.8613	12.0392	11.7883	coding	NM_007069	PLA2G16	RefSeq_coding	1395	chr11	-	63341943	63381909		GTGGGGTCTGGAGACGCAGTTTCCTGTTAATGACAATAAATCCCTGCTCCCCCTGCCTCA	11145	Hs.502775	GO:0016787|GO:0003674|GO:0004623|GO:0005515|GO:0008150|GO:0016042|GO:0045786|GO:0005575|GO:0005737|GO:0016021|GO:0048471|GO:0005886	NP_009000	Phospholipase A2, group XVI
ASHG19A3A006291	885.467	536.392	649.853	544.542	779.811	675.007	687.846	526.106	1640.02	913.556	1322.89	1046.54	9.66092	9.11742	9.44829	9.5335	9.61133	9.21757	9.51432	9.78481	10.1412	9.76629	10.0973	9.82203	coding	NM_172081	CAMK2B	RefSeq_coding	4097	chr7	-	44256748	44365230		CCCAAAGGGACGCTTCCTCCTGCCGCCCTGGAGTCTTCTGACAGTGCCAATACCACCATA	816	Hs.351887	GO:0005524|GO:0005516|GO:0004683|GO:0000166|GO:0005515|GO:0016740|GO:0019221|GO:0060333|GO:0006468|GO:0007165|GO:0007268|GO:0005829|GO:0005829|GO:0030666|GO:0005654|GO:0005886	NP_742081	Calcium/calmodulin-dependent protein kinase II beta
ASHG19A3A043221	296.949	711.554	151.471	166.738	308.718	352.784	314.71	74.849	392.556	580.944	145.194	521.932	8.09254	9.55489	7.45766	7.85626	8.26945	8.25115	8.3693	7.02342	8.01247	9.06969	7.10515	8.7395	coding	NM_005066	SFPQ	RefSeq_coding	3073	chr1	-	35649202	35658743		AAAGGCATTGTTGAATTTGCTTCTAAGCCAGCAGCAAGAAAGGCATTTGAACGATGCAGT	6421	Hs.355934	GO:0003677|GO:0003723|GO:0000166|GO:0005515|GO:0006310|GO:0006281|GO:0008380|GO:0000380|GO:0006397|GO:0016363|GO:0005654|GO:0005634|GO:0042382	NP_005057	Splicing factor proline/glutamine-rich
ASHG19A3A001839	694.652	278.526	460.142	385.377	383.255	773.927	325.399	235.521	711.528	391.703	662.31	460.361	9.31064	8.12815	8.97824	9.0606	8.57841	9.41668	8.41781	8.67743	8.8794	8.48775	9.132	8.55292	coding	NM_001104558	ELOVL7	RefSeq_coding	3851	chr5	-	60047616	60140101		GCGCTTCGGCTCCGCTCCCTGTGCGAACCCATTAAAAGAGCCAGTAAATCCTGTGGAAAA	79993	Hs.274256	GO:0009922|GO:0005515|GO:0016740|GO:0016747|GO:0044255|GO:0034626|GO:0035338|GO:0019432|GO:0042761|GO:0005783|GO:0005789|GO:0016021|GO:0016020	NP_079206	ELOVL family member 7, elongation of long chain fatty acids (yeast)
ASHG19A3A003894	3459.77	10076.7	2309.5	6228.59	3622.39	11593.9	2947.37	4979.03	5334.58	12408.2	2582.54	7244.24	11.6564	13.1934	11.2737	12.7506	11.9376	13.3271	11.7163	12.6411	12.0448	13.48	11.1208	12.586	coding	NM_001349	DARS	RefSeq_coding	2322	chr2	-	136664253	136743222		TACCATGCCTGACCCAAGAAATCCCAAACAGTCCAACTCTTACGATATGTTCATGAGAGG	1615	Hs.503787	GO:0005524|GO:0004046|GO:0004815|GO:0016874|GO:0003676|GO:0000166|GO:0005515|GO:0006422|GO:0010467|GO:0006461|GO:0006418|GO:0006412|GO:0005737|GO:0005829|GO:0031965|GO:0005634|GO:0005886|GO:0005625	NP_001340	Aspartyl-tRNA synthetase
ASHG19A3A001808	652.98	2388.43	255.359	310.679	489.701	1261.2	649.955	152.663	608.037	547.91	312.826	1096.52	9.21996	11.2691	8.1586	8.76187	8.94247	10.1067	9.42774	8.07612	8.65299	8.98366	8.12459	9.90016	coding	NM_001102	ACTN1	RefSeq_coding	3743	chr14	-	69340840	69446083		TTATGATATTGGCAACGACCCCCAGGGAGAAGCAGAATTTGCCCGCATCATGAGCATTGT	87	Hs.509765	GO:0003779|GO:0005509|GO:0005178|GO:0005515|GO:0017166|GO:0007596|GO:0034329|GO:0048041|GO:0051271|GO:0030168|GO:0002576|GO:0042981|GO:0015629|GO:0005737|GO:0005829|GO:0005576|GO:0005925|GO:0005730|GO:0031093|GO:0031143|GO:0030017	NP_001123477	Actinin, alpha 1
ASHG19A3A006061	953.389	365.251	752.857	562.95	815.894	836.719	685.104	683.141	1266.89	599.449	992.555	662.563	9.76308	8.54381	9.65112	9.5731	9.67224	9.53174	9.50446	10.1274	9.71847	9.12384	9.70042	9.11215	coding	NM_147148	GSTM4	RefSeq_coding	1372	chr1	+	110198697	110208123		GAAGGACTTCATCTCCCGCTTTGAGGTTTCCTGTGGCATAATGTGATGGTCAATTTTCTG	2948	Hs.348387	GO:0004364|GO:0016740|GO:0008152|GO:0018916|GO:0042178|GO:0006805|GO:0005737|GO:0005789	NP_671489	Glutathione S-transferase mu 4
ASHG19A3A008117	557.676	289.609	423.922	291.361	465.457	451.43	405.1	261.904	1210.89	496.126	792.604	997.357	8.99463	8.19251	8.86161	8.66847	8.86231	8.61211	8.75246	8.82642	9.65398	8.84998	9.39486	9.7506	coding	NM_138463	TLCD1	RefSeq_coding	1037	chr17	-	27051367	27053230		GCACAACCTGCTCGTCTCCTTCGCTCACTCCATTGTGTCGGGGATCTGGGCACTGCTGTG	116238	Hs.499952	GO:0016021|GO:0016020	NP_612472	TLC domain containing 1
ASHG19A3A034125	1074.34	323.8	997.779	355.06	605.548	618.774	559.281	301.965	1413.98	435.606	1296.44	639.616	9.94522	8.35503	10.069	8.95082	9.24728	9.0872	9.20876	9.02524	9.89592	8.6489	10.0652	9.05178	coding	NM_001080529	WIPF3	RefSeq_coding	3241	chr7	+	29874340	29945791		ATTCTGTGGAAGACTTTCCCCCTCCGGATGAATATAAACCATGCCAGAAGATTTACCCCA	644150	Hs.709280	GO:0017124|GO:0003779|GO:0030154|GO:0007275|GO:0007283|GO:0005737	NP_001073998	WAS/WASL interacting protein family, member 3
ASHG19A3A026519	131.31	133.518	138.676	112.177	121.116	146.181	104.459	93.288	218.76	187.213	157.672	258.8	6.92958	6.9808	7.34115	7.25472	6.93678	6.96367	6.78985	7.35308	7.20996	7.41616	7.21098	7.67104	coding	NM_019599	TAS2R1	RefSeq_coding	1355	chr5	-	9629108	9630463		AAAGCAGCCTGTTCATAAATATACAACATGTCCCCTTCAGGCCTGTTTATCCAGCCTGAG	50834	Hs.567492	GO:0004872|GO:0008527|GO:0007186|GO:0007635|GO:0050896|GO:0050909|GO:0016021|GO:0016020	NP_062545	Taste receptor, type 2, member 1
ASHG19A3A007969	186.188	334.862	166.327	244.897	95.7581	186.808	180.207	131.47	118.491	384.18	126.419	108.712	7.42703	8.40824	7.57899	8.41828	6.60997	7.32015	7.57729	7.84975	6.37277	8.46148	6.92835	6.33871	coding	NM_145301	FAM18B2	RefSeq_coding	1632	chr17	-	15405577	15466945		GGGCGGGGACTAATGTGTAAGGCTTAACAGATCCAATTCCAGAAATTATCTGTGTTTTTT	201158	Hs.647422	GO:0016021|GO:0016020	NP_660344	Family with sequence similarity 18, member B2
ASHG19A3A054818	755.283	675.662	871.522	3211.58	844.787	646.553	661.605	601.041	889.197	457.36	691.823	1135.06	9.42829	9.47591	9.87124	11.8708	9.73303	9.15452	9.45353	9.96052	9.20848	8.72058	9.19547	9.95471	coding	NM_130897	DYNLRB2	RefSeq_coding	506	chr16	+	80574853	80584539		AGCGACACTGGGTTGGAAACACTTGGCTCTCTCATGAGTATTAAAATTCTATTTCAATCT	83657	Hs.98849	GO:0003777|GO:0007018|GO:0006810|GO:0005737|GO:0005868|GO:0005868|GO:0005856|GO:0005874	NP_570967	Dynein, light chain, roadblock-type 2
ASHG19A3A041102	17289.9	43534.8	14863.6	40149.9	15270.6	30583.4	21031.3	33032.4	15743.4	46928.4	20029.9	32152.3	14.1355	14.9012	14.156	15.3098	14.159	14.6477	14.7093	14.8736	13.7804	15.2099	14.3934	14.623	coding	NM_002444	MSN	RefSeq_coding	3981	chrX	+	64887510	64961792		GGAGGGGTTTATGCTCAATCCATGTTCTATTTCAGTGCCAATAAAATTTAGGAAGACTTC	4478	Hs.87752	GO:0050839|GO:0008092|GO:0005515|GO:0005102|GO:0005200|GO:0006928|GO:0007159|GO:0050900|GO:0022614|GO:0045177|GO:0016324|GO:0005737|GO:0005856|GO:0019898|GO:0030175|GO:0005902|GO:0031528|GO:0005730|GO:0005634|GO:0005886	NP_002435	Moesin
ASHG19A3A040385	927.98	808.717	901.157	682.183	815.172	748.634	857.997	611.175	1484.38	991.595	1334.34	1411.11	9.72696	9.73963	9.91852	9.81891	9.67056	9.3689	9.83699	9.97933	9.97637	9.88545	10.1115	10.2727	coding	NM_001127197	ELF4	RefSeq_coding	4096	chrX	-	129198895	129244688		CGCGAAGTGTGGGAGAGCCCTGCGCCTCGCCCGCCCGGACCAGCCTGCCCCGGCGCCGAG	2000	Hs.271940	GO:0005515|GO:0043565|GO:0003700|GO:0016563|GO:0001866|GO:0001787|GO:0045944|GO:0006355|GO:0006351|GO:0016605|GO:0005634	NP_001412	E74-like factor 4 (ets domain transcription factor)
ASHG19A3A048443	372.799	407.767	169.631	93.3428	330.895	276.076	248.481	124.583	369.097	284.505	215.487	886.987	8.41828	8.70902	7.60324	6.97945	8.36947	7.89373	8.03368	7.77176	7.92807	8.03153	7.62513	9.55781	coding	NM_018638	ETNK1	RefSeq_coding	7101	chr12	+	22778075	22843607		TTGGGGATTGTGGGCTTTGATTCAAGCCAAATACTCCACTATTGAGTTTGATTTCCTTGG	55500	Hs.29464	GO:0005524|GO:0004305|GO:0000166|GO:0006646|GO:0008654|GO:0005737	NP_061108	Ethanolamine kinase 1
ASHG19A3A050576	505.849	1346.64	363.259	225.326	495.293	931.126	607.594	453.887	1193.94	1736.63	472.351	588.431	8.85027	10.4695	8.64407	8.29753	8.96073	9.68133	9.32431	9.56881	9.63113	10.6717	8.68084	8.919	coding	NM_019852	METTL3	RefSeq_coding	1975	chr14	-	21966282	21979457		AATTATTTGGGTGAAGACAAATCAACTGCAACGCATCATTCGGACAGGCCGTACAGGTCA	56339	Hs.168799	GO:0003723|GO:0016422|GO:0008168|GO:0016740|GO:0001510|GO:0010467|GO:0006139|GO:0016607|GO:0005654|GO:0005634	NP_062826	Methyltransferase like 3
ASHG19A3A029267	171.093	144.278	145.225	140.625	113.461	244.4	122.308	76.8416	142.353	134.554	147.324	147.909	7.3067	7.10099	7.40229	7.59875	6.84568	7.72245	7.01681	7.06191	6.61147	6.93409	7.1272	6.80567	coding	NM_001142298	SQSTM1	RefSeq_coding	2931	chr5	+	179233387	179265075		CGCACAGGCAGAAGAGCAGCAGCGTCAGGAAGGTGCCATTGCGGAGCCTCATCTCCTCGG	8878	Hs.709030	GO:0042169|GO:0046872|GO:0005515|GO:0005080|GO:0019901|GO:0030971|GO:0043130|GO:0043130|GO:0008270|GO:0006916|GO:0006915|GO:0006914|GO:0030154|GO:0016197|GO:0008624|GO:0035556|GO:0016236|GO:0048011|GO:0045944|GO:0008104|GO:0043122|GO:0006950|GO:0006511|GO:0005737|GO:0005829|GO:0005829|GO:0005770|GO:0005654|GO:0005634	NP_003891	Sequestosome 1
ASHG19A3A000737	206.872	124.43	223.838	35.1705	249.236	73.6791	256.44	26.094	507.983	226.683	330.876	1237.55	7.57729	6.87115	7.98288	5.44192	7.9541	5.96451	8.07847	5.46924	8.39529	7.70126	8.19831	10.0844	coding	NM_001003396	TPD52L1	RefSeq_coding	1327	chr6	+	125474878	125584644		ATTCCATAAGTATGCCTGCTATGAGACGAAAGTAGGCGGTACGAACCCTAATGGAGGCAG	7164	Hs.591347	GO:0008656|GO:0042802|GO:0005515|GO:0046982|GO:0042803|GO:0006309|GO:0000086|GO:0006917|GO:0046330|GO:0043406|GO:0005737|GO:0048471	NP_003278	Tumor protein D52-like 1
ASHG19A3A049046	1044.12	4936.96	862.434	2023.4	747.802	3575.91	1533.86	3911.17	766.952	5908.6	1329.73	2982.7	9.89793	12.2437	9.8549	11.2675	9.55218	11.6191	10.7142	12.342	8.99837	12.4226	10.1042	11.3466	coding	NM_005475	SH2B3	RefSeq_coding	5425	chr12	+	111843751	111889426		CACATTGTGATAACATAAAGTGGATTCATCTTGTATCATTATAGGCAGAAGGTATTTGGC	10019	Hs.506784	GO:0004871|GO:0007596|GO:0030154|GO:0035162|GO:0035556|GO:0005829	NP_005466	SH2B adaptor protein 3
ASHG19A3A014661	335.565	205.499	277.312	166.182	376.994	296.074	379.468	155.233	514.186	214.8	326.532	308.986	8.27119	7.66965	8.28041	7.8523	8.55272	8.0017	8.65682	8.1009	8.41493	7.62298	8.17889	7.93842	coding	NM_001002258	ATP5G3	RefSeq_coding	2741	chr2	-	176040986	176046391		CCTGGGTGGGAAGAACAGGCCCCTGGAGGGCACTTGACCTTAAGCCTCTTTTCCTCCGCA	518	Hs.429	GO:0015078|GO:0008289|GO:0005515|GO:0005215|GO:0015991|GO:0015986|GO:0007568|GO:0006811|GO:0045471|GO:0006810|GO:0016021|GO:0016020|GO:0031966|GO:0005753|GO:0005739|GO:0045263	NP_001680	ATP synthase, H+ transporting, mitochondrial Fo complex, subunit C3 (subunit 9)
ASHG19A3A011205	181.917	82.1686	113.98	80.2279	121.052	161.811	90.3163	44.0231	182.693	101	144.749	120.844	7.39582	6.23712	7.06889	6.74099	6.93586	7.11206	6.57625	6.23404	6.95347	6.52746	7.10168	6.50232	coding	NM_001080421	UNC13A	RefSeq_coding	9847	chr19	-	17712137	17799008		AGAAACGCAAGTTTGCGACCAAATCCAAGAACAATAGCTGGGCTCCCAAGTACAATGAGA	23025	Hs.164502	GO:0019992|GO:0046872|GO:0050435|GO:0006887|GO:0035556|GO:0016188|GO:0030054|GO:0005737|GO:0005886|GO:0042734|GO:0045202	NP_001073890	Unc-13 homolog A (C. elegans)
ASHG19A3A013410	76166.5	37721	59333.3	55667.7	48038.3	59285.5	41771.4	35968.2	73761.3	45356.4	71808.9	51161.3	16.4466	14.72	16.251	15.7044	16.0204	15.608	15.6801	14.9731	16.3072	15.1622	16.5325	15.3387	coding	NM_001134693	OST4	RefSeq_coding	509	chr2	-	27293343	27294567		CCCAGTATAGGGGCTTGCTTTTCTACTCCCTCCCCCCAATATAAAAATATAGACTTTTTT	100128731	Hs.502948	GO:0016021|GO:0016020	NP_001128165	Oligosaccharyltransferase 4 homolog (S. cerevisiae)
ASHG19A3A005789	328.843	83.604	241.368	131.825	136.337	212.695	162.005	79.2538	211.806	98.6357	224.191	133.047	8.23969	6.26415	8.0847	7.50123	7.09877	7.51341	7.42023	7.10845	7.16601	6.4914	7.67659	6.65129	coding	NM_130853	PTPRS	RefSeq_coding	6006	chr19	-	5205519	5340814		GTGCGGCAGCGCACGCTGCAGTCCATCTCGCCCAAGAACTTCAAGGTGAAAATGATCATG	5802	Hs.728875	GO:0016787|GO:0005515|GO:0004872|GO:0005001|GO:0007155|GO:0006470|GO:0005887|GO:0016020	NP_570925	Protein tyrosine phosphatase, receptor type, S
ASHG19A3A053778	1176.69	1289.63	659.553	489.558	1104.43	1465.26	872.802	669.939	842.907	1087.08	919.801	1795.13	10.0683	10.4088	9.46503	9.39195	10.1173	10.3231	9.86002	10.1022	9.12679	10.0095	9.59445	10.6383	coding	NM_007006	NUDT21	RefSeq_coding	4407	chr16	-	56463048	56485261		AGACTGGGTCATTGACGATTGCATTGGTAACTGGTGGAGACCAAATTTTGAACCTCCTCA	11051	Hs.528834	GO:0017091|GO:0003723|GO:0042826|GO:0016787|GO:0003729|GO:0005515|GO:0042803|GO:0008380|GO:0010467|GO:0031124|GO:0006378|GO:0006397|GO:0006397|GO:0000398|GO:0051262|GO:0006369|GO:0006366|GO:0005813|GO:0005849|GO:0005654|GO:0005634|GO:0042382	NP_008937	Nudix (nucleoside diphosphate linked moiety X)-type motif 21
ASHG19A3A046751	754.866	1026.12	428.195	927.574	682.893	986.736	433.309	275.507	693.337	762.595	505.863	614.993	9.42742	10.0915	8.87579	10.2272	9.42157	9.76859	8.84609	8.9022	8.84189	9.48869	8.77269	8.9863	coding	NM_014288	ITGB3BP	RefSeq_coding	892	chr1	-	63906461	63988835		GTCTATTTGCTTCTCCCACAAGTTCTGAAGAGCAAAAGCACAGAAATGGACTATCAAATG	23421	Hs.166539	GO:0008022|GO:0004871|GO:0034080|GO:0000087|GO:0006915|GO:0007155|GO:0008624|GO:0000278|GO:0000236|GO:0048011|GO:0006334|GO:0007165|GO:0000775|GO:0005737|GO:0005829|GO:0005829|GO:0005624|GO:0005730|GO:0005654|GO:0005654|GO:0005634	NP_055103	Integrin beta 3 binding protein (beta3-endonexin)
ASHG19A3A040330	74168.6	142822	63290.5	111121	47561.4	91422.7	50890.7	91760.9	44571.1	80375.2	42858.7	76392.1	16.4041	16.5296	16.3556	16.5555	15.9964	16.212	15.9887	16.109	15.5261	15.9682	15.7515	15.9803	coding	NM_001000	RPL39	RefSeq_coding	401	chrX	-	118920468	118925606		TCTGTTATGAACACGTTGGTTGGCTGGATTCAGTAATAAATATGTAAGGCCTTTCTTTTT	6170	Hs.558387	GO:0003723|GO:0003735|GO:0044267|GO:0031018|GO:0010467|GO:0006412|GO:0006414|GO:0006415|GO:0019058|GO:0016032|GO:0019083|GO:0005829|GO:0005829|GO:0022625|GO:0005622|GO:0005840	NP_000991	Ribosomal protein L39
ASHG19A3A029689	4590.88	11942.2	3225.6	11444.3	3850.92	25987.9	16423.1	30603.2	12244.2	41673.6	5988.44	8898.48	12.1017	13.385	11.7684	13.6336	12.0495	14.4302	14.3519	14.7927	13.3817	15.0501	12.3775	12.8696	coding	NM_002117	HLA-C	RefSeq_coding	1543	chr6	-	31236529	31239855		TGGTTGTCCTAGCTGTCCTTGGAGCTGTGGTCACCGCTATGATGTGTAGGAGGAAGAGCT	3106	Hs.654404	GO:0032393|GO:0005515|GO:0019882|GO:0002474|GO:0019221|GO:0006952|GO:0006955|GO:0060333|GO:0044419|GO:0050776|GO:0060337|GO:0042612|GO:0016021|GO:0005887|GO:0005624|GO:0005886|GO:0005886	NP_005505	Major histocompatibility complex, class I, B
ASHG19A3A004607	1132.95	1127.74	696.588	607.393	811.381	2201.89	715.428	428.233	875.595	1090.76	1148.83	1829.24	10.0148	10.2247	9.54327	9.66849	9.66458	10.9156	9.57758	9.4955	9.18629	10.0133	9.89145	10.6635	coding	NM_007311	TSPO	RefSeq_coding	665	chr22	+	43547534	43559247		TTCCCGGAGCGTGCCCTCGCCGCTGGTACGGCTCCTACCTGGTCTGGAAAGAGCTGGGAG	706	Hs.202	GO:0005497|GO:0008503|GO:0015485|GO:0004872|GO:0030325|GO:0007568|GO:0006820|GO:0006915|GO:0048266|GO:0008283|GO:0071476|GO:0071222|GO:0071294|GO:0060242|GO:0008347|GO:0006783|GO:0060253|GO:0045019|GO:0032720|GO:0014012|GO:0043065|GO:0051928|GO:0060252|GO:0051901|GO:0010940|GO:0006626|GO:0032374|GO:0050810|GO:0048678|GO:0042493|GO:0010042|GO:0032570|GO:0006950|GO:0033574|GO:0010266|GO:0008202|GO:…	NP_009295	Translocator protein (18kDa)
ASHG19A3A051158	880.244	380.815	549.31	276.343	379.549	642.9	335.104	127.382	468.121	312.346	512.776	295.415	9.65206	8.60804	9.21593	8.59377	8.56316	9.14444	8.46874	7.8041	8.2691	8.16574	8.78722	7.86608	coding	NM_001012758	NUDT17	RefSeq_coding	1093	chr1	-	145586493	145589435		ATACCATCACATTGTTCTGTATCTACTCGTGATCTCCCAGGAATCACAGCAGCAGTTGCA	200035	Hs.585066	GO:0016787|GO:0046872	NP_001012776	Nudix (nucleoside diphosphate linked moiety X)-type motif 17
ASHG19A3A053907	80.3094	64.5265	62.2205	64.0948	69.8671	113.193	60.8476	52.9743	89.5783	82.6596	58.4465	103.06	6.21942	5.86198	6.23498	6.38139	6.15702	6.59313	6.0086	6.50911	5.9987	6.22606	5.91336	6.25438	coding	NM_015020	PHLPP2	RefSeq_coding	7919	chr16	-	71678853	71748704		TGTAAAAGGCTGCACACCCTTGTTGCACACTCCAACAACATCAGCATTTTCCCAGAAATA	23035	Hs.709458	GO:0016787|GO:0046872|GO:0004721|GO:0005737|GO:0016020|GO:0005634	NP_055835	PH domain and leucine rich repeat protein phosphatase 2
ASHG19A3A054286	124.874	140.074	76.3974	49.205	154.61	252.723	97.0459	37.9305	110.869	207.41	122.895	224.91	6.85482	7.05701	6.51171	5.96896	7.27246	7.77157	6.67987	6.01758	6.28192	7.56581	6.8901	7.45244	coding	NM_002484	NUBP1	RefSeq_coding	1265	chr16	+	10837697	10863208		TAAAACACAAAATCTTGGTATTGTCTGGGAAAGGCGGTGTTGGGAAAAGCACATTCAGCG	4682	Hs.81469	GO:0051539|GO:0005524|GO:0051536|GO:0046872|GO:0017111|GO:0000166|GO:0005515|GO:0016049|GO:0006879|GO:0016226|GO:0005737|GO:0005829	NP_002475	Nucleotide binding protein 1 (MinD homolog, E. coli)
ASHG19A3A047014	267.467	169.547	218.993	168.981	218.028	247.884	166.569	142.151	300.955	239.768	262.979	289.81	7.93107	7.3627	7.95445	7.8775	7.76453	7.74389	7.46325	7.97084	7.64716	7.78401	7.896	7.83588	coding	NM_015157	PHLDB1	RefSeq_coding	5695	chr11	+	118477212	118528741		TGGAATTTAGACCAGACTTACAGGCTTTCTGCTCCTTCCTTCAGTGAAGAAGAGTCTCCA	23187	Hs.504062		NP_055972	Pleckstrin homology-like domain, family B, member 1
ASHG19A3A020501	3848.43	1420.09	4793.31	1667.28	4487.41	1792.55	2709.26	1350.01	5204.56	2232.06	6491.76	2676.93	11.8222	10.5341	12.347	11.0192	12.2632	10.6329	11.5905	10.977	12.0054	11.0179	12.5007	11.1995	coding	NM_003216	TEF	RefSeq_coding	4382	chr22	+	41777962	41795328		GGTCCTTCCCCCTGGTCCTGAAGAAGCTGATGGAGAACCCCCCGCGCGAGGCGCGCCTCG	7008	Hs.181159	GO:0003702|GO:0046983|GO:0043565|GO:0003700|GO:0006357|GO:0048511|GO:0005634	NP_003207	Thyrotrophic embryonic factor
ASHG19A3A014619	1194.42	485.673	1267.38	565.182	1001.58	786.822	721.698	517.844	1763.94	661.886	1796.37	862.553	10.0908	8.96357	10.3898	9.57794	9.97242	9.43964	9.5862	9.76006	10.2603	9.26926	10.5596	9.51832	coding	NM_004405	DLX2	RefSeq_coding	2308	chr2	-	172964166	172967478		AGTTTAGCAGTGACCTCAGCAACCCCTCCTTTTTATTTTTTCCTTTAAAAACATTTCAGT	1746	Hs.419	GO:0003682|GO:0043565|GO:0003700|GO:0003727|GO:0030528|GO:0007420|GO:0048755|GO:0051216|GO:0030154|GO:0021893|GO:0048701|GO:0048706|GO:0021879|GO:0021766|GO:0007275|GO:0048715|GO:0000122|GO:0042475|GO:0021772|GO:0045944|GO:0009954|GO:0021882|GO:0006355|GO:0006351|GO:0005634	NP_004396	Distal-less homeobox 2
ASHG19A3A004056	415.951	298.045	349.696	240.021	371.281	411.269	234.413	100.085	404.25	317.95	503.189	336.165	8.56525	8.23174	8.59693	8.38805	8.53117	8.47694	7.9506	7.45735	8.05817	8.18901	8.76452	8.06104	coding	NM_002636	PHF1	RefSeq_coding	2206	chr6	+	33378772	33384229		GGCTCATCTGCAGAGGGCACTGCAGCAGCCCCATCCGGATGTTTGCTTCCTTCCACCCTT	5252	Hs.166204	GO:0046872|GO:0003676|GO:0003700|GO:0008270|GO:0016568|GO:0006351|GO:0005634	NP_077084	PHD finger protein 1
CUST_15_PI426249100	279.746	212.084	233.885	188.385	203.787	202.428	146.426	150.41	319.851	214.534	345.026	276.615	8.00032	7.71689	8.04171	8.0342	7.66563	7.44003	7.27106	8.05313	7.73022	7.62105	8.25788	7.77021	coding	NM_018953_Exon1+	NM_018953	HOX cluster	529	chr12	+	54426831	54427360	uc.344+,NM_018953,	TATAAGCAGAGCCCCAATATCCCTGCCTATAACATGCAAACTTGTGGGAACTATGGATCG
ASHG19A3A013502	260.425	247.831	216.087	62.1376	337.264	326.235	172.466	20.2348	116.967	319.475	315.028	375.913	7.89636	7.95388	7.93848	6.33544	8.39793	8.1381	7.51262	5.09605	6.3523	8.19574	8.13329	8.23465	coding	NM_022366	TFB2M	RefSeq_coding	1799	chr1	-	246703867	246729565		TAATATATTTTTTCACTTGTTAAAGCACTGTTTTGGGAGGCGCAGCGCCACTGTAATAGA	64216	Hs.7395	GO:0008168|GO:0005515|GO:0000179|GO:0008649|GO:0003712|GO:0016740|GO:0045893|GO:0006390|GO:0006390|GO:0006391|GO:0006391|GO:0005759|GO:0005759|GO:0042645|GO:0005739	NP_071761	Transcription factor B2, mitochondrial
ASHG19A3A005939	153.901	120.168	110.143	118.729	110.228	122.227	120.705	127.818	226.615	162.186	192.187	221.735	7.15688	6.82172	7.02223	7.33862	6.80022	6.70417	6.99674	7.80951	7.25745	7.20459	7.46942	7.43103	coding	NM_139277	KLK7	RefSeq_coding	1927	chr19	-	51479729	51487071		CCAAGCCTGACTCTGCTCTCGAGAGCTCCAGCAGGAGAGGCCCTTCCTCGCCTGGCAGCC	5650	Hs.151254	GO:0008233|GO:0004252|GO:0008236|GO:0008544|GO:0006508|GO:0005576	NP_644806	Kallikrein-related peptidase 7
ASHG19A3A003705	209.879	96.5943	129.96	39.7704	330.74	227.316	303.517	37.7917	499.758	173.341	200.118	206.451	7.59374	6.48756	7.25259	5.63803	8.36806	7.6084	8.31671	6.01201	8.36806	7.30281	7.5235	7.32299	coding	NM_001173454	PDHA1	RefSeq_coding	3504	chrX	+	19362010	19379823		CTCTCACTCTCTTAAAACCAGGCAGGCAAGCAGAGTGCTGGTAGCATCCCGTAATTTTGC	5160	Hs.530331	GO:0016491|GO:0005515|GO:0004739|GO:0006096|GO:0055114|GO:0006090|GO:0010510|GO:0005759|GO:0005739	NP_001166927	Pyruvate dehydrogenase (lipoamide) alpha 1
ASHG19A3A045470	181.284	136.677	93.1624	81.6161	243.553	212.734	146.914	78.0622	249.811	137.623	197.176	215.91	7.39059	7.01963	6.78903	6.76685	7.92426	7.51426	7.27545	7.08542	7.38547	6.96536	7.50349	7.38959	coding	NM_030813	CLPB	RefSeq_coding	3131	chr11	-	72003471	72145568		AGATGGAAAAGGGAAGACCATTGATTGCAAGGACGCCATCTTCATCATGACCTCCAATGT	81570	Hs.523877	GO:0005524|GO:0003674|GO:0017111|GO:0000166|GO:0005515|GO:0034605|GO:0005575|GO:0005739	NP_110440	ClpB caseinolytic peptidase B homolog (E. coli)
ASHG19A3A006212	52.6019	68.2985	52.6496	83.0361	61.2219	58.2836	55.5268	42.7307	150.839	74.7435	89.0692	128.653	5.60422	5.95001	6.01992	6.79577	5.96674	5.6118	5.87995	6.18904	6.69308	6.08122	6.46753	6.59662	coding	NM_153246	C6orf223	RefSeq_coding	3595	chr6	+	43968336	43973692		GGAGTGGGCCTGCATTCTGCGGAGGAAGACCCCCAGGCACAAGCAGCCCACCTTACTGAT	221416	Hs.531926		NP_694978	Chromosome 6 open reading frame 223
ASHG19A3A029079	211.542	51.1347	116.922	104.414	91.793	102.067	89.3326	54.6005	195.494	70.6385	174.616	100.551	7.60633	5.50752	7.10394	7.14569	6.54715	6.44898	6.55876	6.55465	7.0518	6.00233	7.34598	6.2156	coding	NM_001037333	CYFIP2	RefSeq_coding	6498	chr5	+	156693090	156822604		GCGGGGCAGAGCATCCTGCGCCCCGGCGCGGGGCCCTGCGGTAGCCTCAGGCCCCTCCCC	26999	Hs.519702	GO:0005515|GO:0006915|GO:0016337|GO:0030054|GO:0005737|GO:0048471|GO:0045202|GO:0019717	NP_055191	Cytoplasmic FMR1 interacting protein 2
ASHG19A3A052676	356.954	53.1215	206.953	142.967	133.043	177.542	118.169	46.009	290.708	72.1618	304.125	143.619	8.35468	5.56584	7.87697	7.62164	7.0676	7.25089	6.96651	6.29662	7.60068	6.0338	8.08666	6.7621	coding	NM_001165037	GABRA5	RefSeq_coding	2776	chr15	+	27112272	27194356		GCGGAGGAGAAGGAGGATGCATCCTCACCGACGGCTCGCCTCCCGGGGCCGGCGCGCAGG	2558	Hs.24969	GO:0004890|GO:0005254|GO:0005230|GO:0005216|GO:0004872|GO:0005215|GO:0008306|GO:0001662|GO:0007420|GO:0007214|GO:0034220|GO:0007165|GO:0007268|GO:0055085|GO:0006810|GO:0030054|GO:0034707|GO:0005887|GO:0005886|GO:0045211|GO:0045202	NP_001158509	Gamma-aminobutyric acid (GABA) A receptor, alpha 5
ASHG19A3A005073	181.403	140.218	183.898	145.819	167.7	184.712	177.6	120.931	332.117	174.926	252.886	266.355	7.39171	7.05786	7.71064	7.65491	7.38996	7.30787	7.55532	7.7288	7.78303	7.31658	7.84417	7.71669	coding	NM_018913	PCDHGA10	RefSeq_coding	4617	chr5	+	140792742	140892546		TATAGAGGATACCCCATTGGTTCCACAAGCCCCGCCCAACACGGACTGGCGTTTCTCTCA	5098	Hs.368160	GO:0005509|GO:0016339|GO:0007155|GO:0007156|GO:0016021|GO:0016020|GO:0005886	NP_115779	Protocadherin gamma subfamily C, 3
ASHG19A3A012094	7962.53	3355.77	9496.77	4469.01	7534.54	5693.1	7259.17	4404.14	15454.3	5161.37	13412.9	7716.05	12.886	11.7278	13.4184	12.3017	13.0818	12.2832	13.0956	12.4952	13.7588	12.2178	13.6407	12.6656	coding	NM_015414	RPL36	RefSeq_coding	557	chr19	+	5690345	5691676		CTGGGCCTCGGGAACTGAGCCGGTACTCACCTCCGCCCCTTCTCCCCGTCGCTGTCCGCA	25873	Hs.408018	GO:0005515|GO:0003735|GO:0044267|GO:0031018|GO:0010467|GO:0006412|GO:0006412|GO:0006414|GO:0006415|GO:0019058|GO:0016032|GO:0019083|GO:0005829|GO:0005829|GO:0022625|GO:0005622|GO:0005730|GO:0005840	NP_378669	Ribosomal protein L36
ASHG19A3A006541	295.002	382.866	261.475	391.022	402.397	559.603	336.258	333.522	476.782	418.192	426.898	553.681	8.08288	8.6204	8.19361	9.08112	8.6505	8.93	8.47542	9.1653	8.29776	8.58782	8.53926	8.83089	coding	NM_181454	MRPL55	RefSeq_coding	700	chr1	-	228294380	228297013		GGACCAGCCCCAGGCTCCTGTGCTGGCGGTTCTGAGAAGTCCAAGGGTTGCTGGGAGAGG	128308	Hs.63236	GO:0003735|GO:0006412|GO:0005762|GO:0005739|GO:0005840	NP_852130	Mitochondrial ribosomal protein L55
ASHG19A3A040712	78.7793	287.058	42.6876	114.082	81.8546	183.201	105.097	34.5817	170.979	215.9	59.4798	191.05	6.19395	8.17952	5.74021	7.27814	6.38578	7.29471	6.79981	5.88266	6.86349	7.63111	5.93571	7.20142	coding	NM_005089	ZRSR2	RefSeq_coding	1512	chrX	+	15808573	15841380		AGACTTCTATGAGGATGTGTTGCCCGAGTTCAAGAACGTGGGGAAAGTGATTCAGTTCAA	8233	Hs.171909	GO:0003723|GO:0046872|GO:0000166|GO:0030628|GO:0005515|GO:0008270|GO:0008380|GO:0000398|GO:0000245|GO:0005689|GO:0005634	NP_005080	Zinc finger (CCCH type), RNA-binding motif and serine/arginine rich 2
ASHG19A3A003524	132.798	225.822	138.008	185.79	142.727	234.463	156.133	171.93	247.115	236.234	183.157	316.732	6.94536	7.81546	7.33499	8.01303	7.15865	7.65467	7.36752	8.23683	7.37043	7.76319	7.40786	7.97559	coding	NM_001170717	BCAR1	RefSeq_coding	3311	chr16	-	75262928	75285526		GCCAGGGCCAGGCTGAGGCTGTGGGGTGTCTGGGTCTACGACGTTCCTCCATCGGTGAGC	9564	Hs.479747	GO:0017124|GO:0005515|GO:0019901|GO:0019903|GO:0004871|GO:0050853|GO:0007186|GO:0007186|GO:0050852|GO:0007015|GO:0050851|GO:0007596|GO:0007155|GO:0051301|GO:0016477|GO:0008283|GO:0007173|GO:0008286|GO:0007229|GO:0048011|GO:0048008|GO:0030335|GO:0042981|GO:0001558|GO:0007165|GO:0030054|GO:0005737|GO:0005829|GO:0005829|GO:0005925|GO:0005624|GO:0001726	NP_055382	Breast cancer anti-estrogen resistance 1
ASHG19A3A003161	2000.65	641.123	1478.86	893.72	1121.93	1479.03	1082.43	515.161	1430.42	748.978	1340.03	1084.13	10.8432	9.39322	10.6037	10.1741	10.1442	10.3333	10.1834	9.74999	9.91712	9.46182	10.1194	9.88365	coding	NM_001163335	SYTL5	RefSeq_coding	4821	chrX	+	37865834	37988072		TCCTAAGCCTGTGTTCTATCTTAAGTGTTTTCTGCATTCTCTCCCAGCGGATCTGATTCC	94122	Hs.662334	GO:0017137|GO:0046872|GO:0005515|GO:0008270|GO:0006887|GO:0006886|GO:0016020	NP_620135	Synaptotagmin-like 5
ASHG19A3A020383	1370.62	1028.74	1544.73	1075.13	1370.14	1131.43	1285.1	1067.81	3553.65	1327.21	2205.4	1778.86	10.277	10.0947	10.6704	10.4349	10.448	9.95988	10.4327	10.6936	11.4055	10.3008	10.8844	10.6223	coding	NM_001135729	TOM1	RefSeq_coding	2326	chr22	+	35695267	35743985		ATTAAATTGCCTCTCAGTCTCAACAGATGACAAACCCCTTGCCCTTGCCTCTGATTTAAG	10043	Hs.474705	GO:0005515|GO:0006897|GO:0016197|GO:0016197|GO:0006886|GO:0015031|GO:0005737|GO:0005829|GO:0005769|GO:0005622|GO:0016020	NP_005479	Target of myb1 (chicken)
ASHG19A3A054213	92.3849	120.284	64.3975	110.859	79.6602	127.714	95.4971	39.2177	145.313	113.671	88.9174	113.951	6.42437	6.82318	6.27992	7.23682	6.34646	6.76648	6.65711	6.06928	6.64114	6.69042	6.46571	6.41075	coding	NM_020912	FLYWCH1	RefSeq_coding	2555	chr16	+	2961979	2990151	NM_032296,	AAGCCAGCGCCGTGACCCAGGTGTGGGGGATGATGGTGACGCTTCTCACTCACGTGTGAA	84256	Hs.655321	GO:0003677|GO:0046872|GO:0005634	NP_115672	FLYWCH-type zinc finger 1
ASHG19A3A034185	256.804	119.526	192.234	148.035	158.019	191.277	159.631	118.174	287.577	126.084	200.438	152.326	7.87495	6.81349	7.77093	7.67575	7.30114	7.35234	7.39918	7.69618	7.58468	6.846	7.52622	6.85063	coding	NM_207172	NPSR1	RefSeq_coding	1567	chr7	+	34697896	34889590		TAATGACTGCATGCACTGCTTAAGTATTGGCCAACACGAACTCCCCAGTTATTCATGCCA	387129	Hs.652373	GO:0004930|GO:0004872|GO:0005000|GO:0005737|GO:0016021|GO:0005886|GO:0005886|GO:0005886	NP_997056	Neuropeptide S receptor 1
ASHG19A3A036774	507.677	286.777	3509.65	664.009	2689.13	896.647	2322.31	1143.42	1054.52	341.962	3692.73	1062.85	8.85563	8.17901	11.8869	9.78286	11.4757	9.63771	11.3576	10.7789	9.44909	8.2947	11.6829	9.851	coding	NM_017864	INTS8	RefSeq_coding	3393	chr8	+	95835533	95892720		AATTGTTCAAAGTAGTTTTCCAGTCAAACAGGCAAAACCCGGACCCCCTCAGTTAAGTGT	55656	Hs.727669	GO:0005515|GO:0016180|GO:0032039|GO:0005634	NP_060334	Integrator complex subunit 8
ASHG19A3A004362	196.714	123.394	194.515	144.33	163.895	173.562	180.053	113.812	264.671	145.252	213.057	175.066	7.50618	6.86029	7.78915	7.63627	7.35394	7.21734	7.57585	7.64408	7.4663	7.04066	7.60979	7.06563	coding	NM_005046	KLK7	RefSeq_coding	1927	chr19	-	51479729	51487150		ACTTGGATCACATCAGATCCTCTCGAGCTCCAGCAGGAGAGGCCCTTCCTCGCCTGGCAG	5650	Hs.151254	GO:0008233|GO:0004252|GO:0008236|GO:0008544|GO:0006508|GO:0005576	NP_644806	Kallikrein-related peptidase 7
ASHG19A3A018938	1151.71	496.641	1239.02	616.185	1046.64	779.028	934.136	413.424	2258.98	630.605	1536.16	903.977	10.0382	8.9989	10.3672	9.68536	10.0345	9.42683	9.96497	9.45274	10.6694	9.19959	10.3293	9.58998	coding	NM_000071	CBS	RefSeq_coding	2609	chr21	-	44473300	44496040		GTCTCCGCCTCGCCGCAGTCGGGGCAGCCGCTCGCCCCTCTTTTCCATGTATCCGTCCAG	875	Hs.533013	GO:0004122|GO:0019899|GO:0020037|GO:0020037|GO:0042802|GO:0016829|GO:0046872|GO:0005515|GO:0042803|GO:0030170|GO:0031625|GO:0019448|GO:0006565|GO:0006563|GO:0008652|GO:0006535|GO:0019343|GO:0001958|GO:0043418|GO:0050667|GO:0070814|GO:0043506|GO:0051593|GO:0031667|GO:0019346|GO:0005737|GO:0005829|GO:0043231|GO:0005730|GO:0005634|GO:0005625	NP_001171480	Cystathionine-beta-synthase
ASHG19A3A054946	1368.49	2161.26	1173.57	1368.04	1547.58	2257.98	1534.67	3309.36	1235.14	2411.09	1631.15	5599.06	10.2741	11.1309	10.2831	10.7644	10.6299	10.9463	10.7157	12.1161	9.68607	11.1217	10.4165	12.2145	coding	NM_017702	DEF8	RefSeq_coding	921	chr16	+	90015150	90025773		CGTTGTACTGTCTACATTGGACAGGGCTGTTCTGGATGAGAAATTAAACTAGTGAATTAC	54849	Hs.62771	GO:0046872|GO:0008270|GO:0035556	NP_997397	Differentially expressed in FDCP 8 homolog (mouse)
ASHG19A3A044118	69.492	149.782	56.0681	79.5524	99.7425	288.282	75.3794	52.6542	112.442	178.353	91.14	165.371	6.00332	7.16554	6.10521	6.72669	6.66861	7.96086	6.3173	6.50162	6.30029	7.34197	6.49696	6.97859	coding	NM_173540	FUT11	RefSeq_coding	2069	chr10	+	75532048	75535974		ATGAAATACCTGGCATACAAGCAACCTGGGGGCATCACCAACCAATTTCTTCTGGATAGT	170384	Hs.588854	GO:0046920|GO:0016757|GO:0006486|GO:0005794|GO:0032580|GO:0016021|GO:0016020	NP_775811	Fucosyltransferase 11 (alpha (1,3) fucosyltransferase)
ASHG19A3A003537	67.9484	79.6676	54.2692	71.755	76.3133	91.84	56.7142	51.0681	81.9232	83.4555	53.8006	101.76	5.97147	6.18532	6.05826	6.56357	6.28568	6.29345	5.90985	6.45397	5.87435	6.23945	5.80154	6.23484	coding	NM_001170782	FAM122C	RefSeq_coding	1947	chrX	+	133941204	133957005		AACATTTAGGAATCGACGCTCTCTGGAATTCTGGCACTTCTGCTCAAGCCGGATGTCACT	159091	Hs.269127		NP_620174	Family with sequence similarity 122C
ASHG19A3A050155	63.1968	86.9019	35.9818	74.9915	65.1727	98.0067	42.6421	77.517	91.9416	112.71	53.8766	142.644	5.86423	6.32797	5.51346	6.62948	6.0548	6.38683	5.49725	7.07537	6.03543	6.67868	5.80269	6.75348	coding	NM_015116	LRCH1	RefSeq_coding	5490	chr13	+	47127295	47319034	NM_001164211,	GGTGTTTTGCCTTTGCCTGTGGGGAAAAAGTAGGGATGATATTTTAAAATTTTAAGAAAC	23143	Hs.507971		NP_055931	Leucine-rich repeats and calponin homology (CH) domain containing 1
ASHG19A3A023258	2966.2	447.169	1914.3	867.504	1481.38	1523.35	1264.15	311.369	2603.55	714.61	2057.11	825.593	11.4234	8.83696	10.9916	10.1386	10.5717	10.3758	10.4137	9.06802	10.8967	9.38966	10.7716	9.44233	coding	NM_181897	PPP2R3A	RefSeq_coding	4664	chr3	+	135741581	135866733		TGTGATTTTGTTCTCCCTTCACGGTTTAAGAAGCGGCTGAAGTCATTTCAGCAGACACAG	5523	Hs.518155	GO:0005509|GO:0005515|GO:0008601|GO:0006470|GO:0000159|GO:0000159	NP_871626	Protein phosphatase 2, regulatory subunit B'', alpha
ASHG19A3A010534	649.358	354.855	621.566	341.695	592.005	479.099	503.086	325.473	1135.77	401.264	747.045	514.726	9.21127	8.49943	9.38387	8.89455	9.21181	8.71066	9.06601	9.12909	9.56588	8.52324	9.31366	8.71673	coding	NM_001100619	CABLES1	RefSeq_coding	5024	chr18	+	20715726	20840434		TCAGGGAATCCTGCCCATCGCCTTCTCCAGGCCGACTTCGCAGAACTACTGCTCCCTGGA	91768	Hs.11108	GO:0016538|GO:0005515|GO:0007596|GO:0007399|GO:0051726|GO:0051302|GO:0005737|GO:0005829|GO:0005634	NP_612384	Cdk5 and Abl enzyme substrate 1
ASHG19A3A012649	229.456	281.592	269.061	380.405	600.598	454.361	304.643	181.288	568.442	296.847	277.916	410.83	7.71538	8.14984	8.23424	9.04444	9.23432	8.62454	8.32305	8.31855	8.55813	8.09025	7.9635	8.37814	coding	NM_001001716	NFKBIB	RefSeq_coding	2213	chr19	+	39390614	39399533		AACTCTGGAGTGGCGGCTGGCTAGAAATTGGTCTGTAGAAATGACCTTGAAAATGGAGTT	4793	Hs.9731	GO:0005515|GO:0004871|GO:0003713|GO:0002755|GO:0002755|GO:0002756|GO:0002756|GO:0008063|GO:0007253|GO:0045087|GO:0051092|GO:0007165|GO:0034130|GO:0034134|GO:0034138|GO:0034142|GO:0002224|GO:0005737|GO:0005829|GO:0005634	NP_002494	Nuclear factor of kappa light polypeptide gene enhancer in B-cells inhibitor, beta
ASHG19A3A006651	479.335	76.505	368.635	39.215	902.341	914.819	543.932	39.3079	967.068	597.254	448.321	101.211	8.76858	6.12156	8.66633	5.61797	9.82586	9.66281	9.16608	6.07334	9.32654	9.11654	8.60856	6.2264	coding	NM_182848	CLDN10	RefSeq_coding	2658	chr13	+	96085852	96232010		CCGCATTTTACTATCTTCAAAGTAGCAGGTTATATACAGGCATGTAGAGGACTTATGATC	9071	Hs.534377	GO:0042802|GO:0005198|GO:0016338|GO:0007155|GO:0030054|GO:0016021|GO:0005886|GO:0005923	NP_878268	Claudin 10
ASHG19A3A002923	66.6745	47.4712	60.8397	54.9224	73.3906	62.7306	57.4711	52.0674	93.4355	66.184	82.126	88.073	5.94371	5.39625	6.20594	6.1425	6.23021	5.72057	5.92883	6.48476	6.05571	5.90482	6.36004	6.00454	coding	NM_001146158	MOGS	RefSeq_coding	2584	chr2	-	74688184	74692537		AGGGCGAGAGGCGGGAGCCGGAGAGCCCCGCCGTGGCCCCGGACCTCTTCTGGGGAACCT	7841	Hs.516119	GO:0015926|GO:0016798|GO:0004573|GO:0044267|GO:0009311|GO:0043687|GO:0006487|GO:0018279|GO:0006457|GO:0005783|GO:0005789|GO:0016021|GO:0016020|GO:0005624	NP_006293	Mannosyl-oligosaccharide glucosidase
ASHG19A3A024155	9650.56	10132.8	4273.74	1397.21	7402.17	6071.31	5033.28	4704.2	8050.58	4777.62	10661.6	8605.72	13.1934	13.199	12.1989	10.7938	13.0565	12.3884	12.5676	12.5718	12.6971	12.119	13.29	12.8195	coding	NM_001924	GADD45A	RefSeq_coding	1355	chr1	+	68150882	68154019		CATAGTTTGGGTATTTTTGGTTTATATGCCCTCAAGTAAAAGAAAAGCCGAAAGGGTTAA	1647	Hs.80409	GO:0005515|GO:0006281|GO:0000086|GO:0006915|GO:0007050|GO:0071479|GO:0071260|GO:0007098|GO:0006469|GO:0000079|GO:0042770|GO:0005634	NP_001915	Growth arrest and DNA-damage-inducible, alpha
ASHG19A3A004926	567.579	392.239	472.751	236.827	935.85	512.297	479.124	174.256	696.937	442.242	864.891	359.853	9.02152	8.65682	9.01483	8.36968	9.87611	8.80544	8.99273	8.2585	8.84866	8.67092	9.50363	8.16676	coding	NM_016826	OGG1	RefSeq_coding	1957	chr3	+	9791627	9808352		AGGCCCTCTGCATCCTGCCTGGAGTGGGCACCAAGGGCCTCCTTGGCAATGCATTTGATG	4968	Hs.380271	GO:0003684|GO:0004519|GO:0016798|GO:0016829|GO:0008534|GO:0005515|GO:0006281|GO:0006284|GO:0006285|GO:0045007|GO:0045007|GO:0006289|GO:0033158|GO:0006979|GO:0009314|GO:0005737|GO:0005739|GO:0016363|GO:0016607|GO:0005730|GO:0005654|GO:0005654|GO:0005654|GO:0005634	NP_058438	8-oxoguanine DNA glycosylase
ASHG19A3A010922	140.59	79.4876	132.446	68.6321	81.6305	86.1926	86.8516	56.6229	279.331	77.4905	138.897	105.627	7.02466	6.18111	7.27814	6.48939	6.38162	6.19651	6.51988	6.609	7.54015	6.13205	7.04632	6.29297	coding	NM_000149	FUT3	RefSeq_coding	2607	chr19	-	5842898	5851485		TATCAGTTACATTATAAAAATTTACCTCGTGCCTGAGGCCCCAGAGCCCAAGGGTGCAAA	2525	Hs.169238	GO:0017060|GO:0008417|GO:0016757|GO:0005975|GO:0006486|GO:0005794|GO:0032580|GO:0016021|GO:0016020|GO:0005624	NP_001091110	Fucosyltransferase 3 (galactoside 3(4)-L-fucosyltransferase, Lewis blood group)
ASHG19A3A005433	110.967	73.7077	82.755	59.158	82.4449	136.461	65.2259	54.8439	139.845	83.4176	104.604	105.263	6.68486	6.06347	6.62571	6.26053	6.39555	6.86362	6.10963	6.56096	6.58695	6.2387	6.67957	6.28737	coding	NM_030899	ZNF323	RefSeq_coding	3039	chr6	-	28292516	28304152		TCCGTAGCTTGCCGGTGCCCCGAAGGTGTCTTCTCCTAAGGAAGATTAAATCAGAAAATT	64288	Hs.656413	GO:0003677|GO:0046872|GO:0003700|GO:0008270|GO:0006355|GO:0016032|GO:0005622|GO:0005634	NP_665916	Zinc finger protein 323
ASHG19A3A027371	148.987	198.801	99.0352	112.541	183.669	202.473	123.706	86.3606	190.21	183.31	131.084	321.792	7.11217	7.62005	6.87274	7.25956	7.51662	7.4405	7.03155	7.23804	7.01037	7.38194	6.97229	7.99664	coding	NM_020141	TMEM167B	RefSeq_coding	2768	chr1	+	109633402	109639553		TACTTCAAGAAAGTACCTCGTCTCAAAACCTGGCTGCTATCAGAGAAGAAGGGTGTTTGG	56900	Hs.82933	GO:0005794|GO:0000139|GO:0016021|GO:0016020	NP_064526	Transmembrane protein 167B
ASHG19A3A015434	1919.09	220.385	1532.21	602.051	4557.55	3547.06	1658.87	122.225	3230.59	1323.03	3102.07	169.577	10.7827	7.77405	10.6594	9.65703	12.2916	11.6031	10.8407	7.74425	11.2629	10.2952	11.402	7.018	coding	NM_006488	KHK	RefSeq_coding	2433	chr2	+	27309610	27323619		CAGCTCCTGCTGCATCATCAACAACTCCAATGGCAACCGTACCATTGTGCTCCATGACAC	3795	Hs.567297	GO:0005524|GO:0004454|GO:0016301|GO:0000166|GO:0005515|GO:0016740|GO:0005975|GO:0006001|GO:0009750|GO:0009749|GO:0032868|GO:0009744|GO:0010043|GO:0005737|GO:0005829	NP_006479	Ketohexokinase (fructokinase)
ASHG19A3A047461	193.898	1984.63	114.002	25.0371	128.838	1030.22	252.895	54.5927	238.111	1713.52	139.924	347.986	7.48769	11.0277	7.06917	4.90265	7.02342	9.83353	8.05879	6.55391	7.32337	10.6562	7.05461	8.11967	coding	NM_022159	ELTD1	RefSeq_coding	3619	chr1	-	79355450	79472495		AGCCGTGGTAGTTGGATTTTCGGCAGCACTAGGATACAGATATTATGGCACAACCAAAGT	64123	Hs.132314	GO:0004930|GO:0005509|GO:0046983|GO:0007186|GO:0007218|GO:0016021|GO:0005886	NP_071442	EGF, latrophilin and seven transmembrane domain containing 1
ASHG19A3A044510	376.022	237.349	306.443	286.278	402.545	328.547	314.86	212.656	416.288	287.193	353.353	341.937	8.42694	7.89075	8.41313	8.63923	8.65109	8.14721	8.36989	8.53881	8.1027	8.04668	8.28836	8.08801	coding	NM_004132	HABP2	RefSeq_coding	3019	chr10	+	115312777	115349358		CATTTTTCCCCCCTAAAGGCATAGACAACAAAAGAAATTTTATTGAGAGGAAAACACAAG	3026	Hs.422542	GO:0005539|GO:0008233|GO:0004252|GO:0007155|GO:0006508|GO:0005576|GO:0005615	NP_004123	Hyaluronan binding protein 2
ASHG19A3A004726	380.691	141.667	514.423	173.867	346.204	201.674	326.849	166.608	748.461	203.588	706.33	245.285	8.44183	7.07305	9.12567	7.9175	8.43373	7.43348	8.4233	8.19475	8.95985	7.5411	9.23099	7.58283	coding	NM_014336	AIPL1	RefSeq_coding	2981	chr17	-	6327059	6338519		GGCCGAGTTCTGGTGCGACACCATCCACACGGGGGTCTACCCCATCCTATCCCGGAGCCT	23746	Hs.279887	GO:0005488|GO:0001918|GO:0051082|GO:0018343|GO:0006457|GO:0050896|GO:0007601|GO:0005737|GO:0005634	NP_055151	Aryl hydrocarbon receptor interacting protein-like 1
ASHG19A3A036536	241.771	350.903	231.811	255.234	217.547	241.019	150.037	103.694	210.724	400.948	188.405	231.981	7.78564	8.48084	8.03006	8.48175	7.76136	7.69805	7.30504	7.51119	7.15826	8.52139	7.44512	7.49933	coding	NM_001003791	ERLIN2	RefSeq_coding	1538	chr8	+	37594096	37604070	NM_001003790,	CACTGAAGCAGTGTGACATAAAATAATACCTATGTATACAACACTCCTCTGTAAATAGCA	11160	Hs.705490	GO:0005515|GO:0030433|GO:0005737|GO:0005783|GO:0005789|GO:0016021|GO:0005886	NP_009106	ER lipid raft associated 2
ASHG19A3A034575	354.116	457.542	196.539	156.538	316.759	369.937	273.107	249.745	445.556	656.516	386.904	651.636	8.34278	8.87303	7.80533	7.75592	8.30661	8.32249	8.172	8.75967	8.20306	9.25442	8.41083	9.08608	coding	NM_152902	TIPRL	RefSeq_coding	3032	chr1	+	168148170	168171349		TTTTTCTTGAGAATTGATGGGGTGCTTATCAGAATGAATGACACGAGACTTTACCATGAG	261726	Hs.209431	GO:0005515|GO:0000077|GO:0034048|GO:0005737	NP_690866	TIP41, TOR signaling pathway regulator-like (S. cerevisiae)
ASHG19A3A021223	108.2	232.704	97.7954	93.0109	111.428	140.358	75.6802	79.5024	143.785	159.176	139.004	219.232	6.64571	7.85999	6.85547	6.97308	6.81812	6.90454	6.32352	7.11291	6.62591	7.17542	7.04707	7.41444	coding	NM_198859	PRICKLE2	RefSeq_coding	8322	chr3	-	64079526	64211131		TGTTGCCACTGCTTCGAGTCCTTGTATGCAGAATATTGTGACACCTGTGCCCAACATATA	166336	Hs.728852	GO:0046872|GO:0008270|GO:0045197|GO:0031175|GO:0016327|GO:0005737|GO:0016328|GO:0016020|GO:0031965|GO:0005634	NP_942559	Prickle homolog 2 (Drosophila)
ASHG19A3A043405	143.647	221.901	94.3182	50.1671	157.891	241.757	115.619	25.6905	92.8863	292.239	104.707	194.472	7.05461	7.78576	6.80641	6.00075	7.2998	7.70276	6.93469	5.44864	6.04724	8.06919	6.68067	7.23093	coding	NM_212554	METTL10	RefSeq_coding	2638	chr10	-	126447405	126480439		CCACTGGATGCTTCAGTGCTTGATATTGGAACTGGAAATGGTGTTTTCCTGGTTGAACTT	399818	Hs.468488	GO:0008168|GO:0016740|GO:0008152	NP_997719	Methyltransferase like 10
ASHG19A3A010924	6083.25	5263.34	5340.5	2244.58	6538.65	6900.25	5533.8	3229.37	7262.41	5997.46	7083.49	6925.36	12.4798	12.3402	12.5146	11.3966	12.8487	12.5576	12.6966	12.0829	12.5334	12.4543	12.6274	12.5105	coding	NM_175614	NDUFA11	RefSeq_coding	819	chr19	-	5894685	5904025		TACTGGGATATCCCCGATGGCACCGATTGCCACCGCAAAGCCTACAGCACCACCAGTATT	126328	Hs.406062	GO:0008565|GO:0022904|GO:0016021|GO:0016020|GO:0005743|GO:0005747|GO:0005739|GO:0070469	NP_783313	NADH dehydrogenase (ubiquinone) 1 alpha subcomplex, 11, 14.7kDa
ASHG19A3A005560	679.084	394.753	488.952	503.925	476.111	641.393	420.65	361.485	831.628	660.108	670.616	609.122	9.27592	8.66481	9.05684	9.42683	8.90004	9.14071	8.80209	9.27287	9.10535	9.26417	9.14948	8.96936	coding	NM_032951	MLXIPL	RefSeq_coding	3288	chr7	-	73007523	73038870		ACTCAGTGCCCAGCCCAGCCTCAAGGTGAGCAAAGCTACCACGCTGCAGAAGACAGCTGA	51085	Hs.647055	GO:0003677|GO:0003677|GO:0035538|GO:0046982|GO:0042803|GO:0003700|GO:0016563|GO:0008134|GO:0016564|GO:0009653|GO:0006112|GO:0042593|GO:0010255|GO:0007243|GO:0071157|GO:0090324|GO:0033137|GO:0000122|GO:0045892|GO:0008284|GO:0031325|GO:0045723|GO:0010552|GO:0045821|GO:0046889|GO:0045893|GO:0042304|GO:0006355|GO:0006351|GO:0070328|GO:0005737|GO:0005829|GO:0005654|GO:0005634|GO:0005634|GO:0005667	NP_116572	MLX interacting protein-like
ASHG19A3A015142	961.982	18814.2	827.566	3856.46	938.599	1700.39	1186.31	7757.91	1033.47	2541.81	1677.95	18298	9.77323	13.9131	9.78349	12.091	9.88242	10.5436	10.3216	13.1663	9.41644	11.192	10.4661	13.8261	coding	NM_005737	ARL4C	RefSeq_coding	4024	chr2	-	235401687	235405693		CATCATCCTTCTCTTTTGTTTCCATAGCCTTTTATAATGCATATATGATGCTGTGAACAG	10123	Hs.111554	GO:0005525|GO:0003924|GO:0043014|GO:0000166|GO:0005515|GO:0006184|GO:0032456|GO:0007264|GO:0006810|GO:0005737|GO:0030175|GO:0005622|GO:0005634|GO:0005886	NP_005728	ADP-ribosylation factor-like 4C
ASHG19A3A032400	2555.7	4435.1	2600.99	4763.93	2221.95	3666.76	2262.8	3937.31	1672.59	4293.35	2142.74	4011.6	11.1945	12.1017	11.4545	12.3963	11.1958	11.6519	11.3172	12.3502	10.1716	11.9771	10.8349	11.756	coding	NM_152743	C7orf27	RefSeq_coding	2713	chr7	-	2577510	2595146		GGAGAGAAGCAAGGTCAAGAAATCCCACAGTTTGATGTATTAAAGAAATGACTTATTTCT	221927	Hs.520623	GO:0005515|GO:0010212|GO:0005634	NP_689956	Chromosome 7 open reading frame 27
ASHG19A3A045285	241.036	318.111	156.741	163.982	197.182	259.33	282.891	44.0906	376.423	354.625	182.609	155.852	7.78027	8.32441	7.50258	7.83068	7.61609	7.80899	8.22135	6.23647	7.95609	8.34834	7.40258	6.8838	coding	NM_001081491	NXF1	RefSeq_coding	4147	chr11	-	62559597	62572964		TATTTGCTCCTAGAGCAGCCCAGGAGGCACGGTGGCTCTGAAGCATCACTCACTTCTGTC	10482	Hs.523739	GO:0003729|GO:0005487|GO:0000166|GO:0005515|GO:0010467|GO:0044419|GO:0006406|GO:0006406|GO:0016973|GO:0006810|GO:0005737|GO:0005829|GO:0005622|GO:0042405|GO:0005643|GO:0016607|GO:0005654|GO:0005634	NP_006353	Nuclear RNA export factor 1
ASHG19A3A006266	14965.4	23910.9	11688.6	3031.53	18510.8	24695.3	18112.3	10544.1	20668.3	21955.9	15143.2	23303.3	13.8957	14.201	13.7318	11.7863	14.4426	14.345	14.4901	13.5088	14.27	14.2061	13.8869	14.1775	coding	NM_170679	SKP1	RefSeq_coding	2028	chr5	-	133492083	133512724		CTTTACTGAAGAGGAGGAAGCCCAGGTACGCAAAGAGAACCAGTGGTGTGAAGAGAAGTG	6500	Hs.171626	GO:0005515|GO:0004842|GO:0000082|GO:0000084|GO:0031146|GO:0031145|GO:0000278|GO:0051437|GO:0016567|GO:0051439|GO:0006511|GO:0016032|GO:0019005|GO:0005829|GO:0005829|GO:0005654|GO:0005654	NP_733779	S-phase kinase-associated protein 1
ASHG19A3A043544	272.926	286.501	263.389	113.031	253.887	519.386	242.946	62.5553	334.708	375.091	272.543	845.818	7.96474	8.17729	8.20414	7.2646	7.98372	8.8246	8.00404	6.75757	7.79347	8.42522	7.93878	9.48492	coding	NM_003739	AKR1C3	RefSeq_coding	1224	chr10	+	5136567	5149876	DQ269985,	TCACCAACAGATGAAAATGGAAAAGTAATATTTGACATAGTGGATCTCTGTACCACCTGG	8644	Hs.78183	GO:0004033|GO:0047026|GO:0047718|GO:0016491|GO:0047017|GO:0047045|GO:0050327|GO:0047115|GO:0055114|GO:0006693|GO:0005737|GO:0005622	NP_003730	Aldo-keto reductase family 1, member C3 (3-alpha hydroxysteroid dehydrogenase, type II)
ASHG19A3A039119	517.3	253.207	229.523	182.132	475.623	794.367	373.721	145.561	426.417	326.695	304.473	385.158	8.88543	7.98651	8.01856	7.98421	8.8982	9.45481	8.63312	8.00699	8.13888	8.22896	8.08788	8.2715	coding	NM_032303	HSDL2	RefSeq_coding	3210	chr9	+	115142350	115234684		TTGTTATTGCTGCAAAGACCGCCCAGCCACATCCAAAACTTCTAGGCACAATCTATACTG	84263	Hs.59486	GO:0005488|GO:0016491|GO:0032934|GO:0055114|GO:0005777	NP_115679	Hydroxysteroid dehydrogenase like 2
ASHG19A3A046720	18254.6	4764.28	14717.6	7535.62	21019.6	3714.84	14197.4	2121.88	13182.1	10378.5	15849.8	5113.25	14.2272	12.1989	14.1274	13.0032	14.6855	11.6643	14.1188	11.5562	13.5088	13.223	13.9733	12.0788	coding	NM_016729	FOLR1	RefSeq_coding	982	chr11	+	71903172	71907366	NM_016725,NM_016724,NM_000802,	GCCTCTGACAGCCACTTTGAATAAACCAGACACCGCACATGTGTCTTGAGAATTATTTGG	2348	Hs.73769	GO:0005542|GO:0004872|GO:0008219|GO:0015884|GO:0006898|GO:0031225|GO:0005576|GO:0005887|GO:0005624|GO:0005886	NP_057941	Folate receptor 1 (adult)
ASHG19A3A006265	74.9485	120.931	51.7717	23.0749	107.863	72.7886	147.541	20.4993	192.673	287.882	94.47	66.5266	6.11977	6.83046	5.99739	4.76709	6.77276	5.94541	7.2812	5.11546	7.02951	8.04983	6.5434	5.57299	coding	NM_170675	MEIS2	RefSeq_coding	3625	chr15	-	37183232	37392704		CAACACATGGGGATCCGGCCTGCAGGTTTGCAGAGCATGCCAGGGGACTACGTTTCTCAG	4212	Hs.510989	GO:0043565|GO:0043565|GO:0003700|GO:0003704|GO:0003714|GO:0000122|GO:0006355|GO:0006351|GO:0005634	NP_758527	Meis homeobox 2
ASHG19A3A005543	217.297	239.834	158.064	69.1259	344.674	351.297	298.123	94.7011	344.516	257.992	229.269	442.252	7.64078	7.90489	7.51262	6.50244	8.42679	8.24486	8.29238	7.37558	7.83336	7.89199	7.70836	8.49138	coding	NM_032796	SYAP1	RefSeq_coding	3533	chrX	+	16737706	16780806		CTCCACCAGGCCAAAGACTTCGGCAACTATTTATTTAACTTTGCATCTGCTGCCACAAAA	94056	Hs.729197	GO:0005634	NP_116185	Synapse associated protein 1
ASHG19A3A006911	838.782	640.441	1111.78	306.718	1073.8	715.642	1036.46	448.891	1919.96	668.054	1351.37	892.748	9.58113	9.39081	10.214	8.74617	10.0753	9.30115	10.1167	9.55781	10.4043	9.28434	10.1326	9.56831	coding	NM_201440	PPHLN1	RefSeq_coding	1555	chr12	+	42719946	42835764	NM_201438,NM_001143789,NM_001143787,	AGCACCTCCTCGAAGTCATCCCAGTGATGAATCTGGTTATAGATGGACAAGAGACGATCA	51535	Hs.444157	GO:0031424|GO:0005737|GO:0005634	NP_958923	Periphilin 1
ASHG19A3A024804	260.274	113.462	203.993	128.188	146.484	214.617	175.375	89.3161	237.874	142.956	211.228	135.81	7.89571	6.73318	7.85626	7.45579	7.19439	7.52458	7.53838	7.28815	7.32217	7.0174	7.59746	6.68154	coding	NM_198682	GYPE	RefSeq_coding	1783	chr4	-	144792019	144826716		GTCCCTCTCTGTGGAAGAATACTGAATAGAAGAGAGAAATCACTCAATATGTGGAATGAC	2994	Hs.654368	GO:0005887|GO:0005886	NP_002091	Glycophorin B (MNS blood group)
ASHG19A3A025812	51.9764	74.7267	39.6155	43.6681	53.4772	61.2648	51.2368	31.8943	86.5995	73.8235	42.0271	89.4977	5.58907	6.0859	5.63998	5.78018	5.7879	5.68799	5.7684	5.76555	5.95061	6.06331	5.47401	6.02983	coding	NM_001203	BMPR1B	RefSeq_coding	5560	chr4	+	95679127	96079592		ATGGCTGACATGTATAGTTTTGGCCTCATCCTTTGGGAGGTTGCTAGGAGATGTGTATCA	658	Hs.598475	GO:0005524|GO:0046332|GO:0046872|GO:0000166|GO:0005515|GO:0004674|GO:0004872|GO:0004702|GO:0005024|GO:0004675|GO:0004675|GO:0030509|GO:0030509|GO:0030509|GO:0001502|GO:0001654|GO:0035108|GO:0001550|GO:0042698|GO:0030501|GO:0045597|GO:0045669|GO:0006468|GO:0001501|GO:0005887|GO:0005886|GO:0005886|GO:0043235	NP_001194	Bone morphogenetic protein receptor, type IB
ASHG19A3A017601	2242.16	2087.41	1729.46	1039.56	2567.39	3415.8	1744.32	1127.12	2617.4	3282.35	2307.74	3876.64	11.0113	11.0884	10.8442	10.3871	11.4042	11.5444	10.9122	10.7616	10.9045	11.5706	10.9517	11.7018	coding	NM_002212	EIF6	RefSeq_coding	1114	chr20	-	33866724	33872594	NM_181468,	TACCACCGACCAGGAGCTGCAACACATTCGCAACAGCCTCCCAGACACAGTGCAGATTAG	3692	Hs.654848	GO:0005515|GO:0043022|GO:0003743|GO:0042256|GO:0005737|GO:0005730|GO:0005634	NP_852133	Eukaryotic translation initiation factor 6
ASHG19A3A054782	115.068	953.739	160.657	205.841	91.2557	88.1529	57.8902	171.689	233.203	224.378	706.886	294.431	6.73693	9.9906	7.53452	8.16211	6.53836	6.22966	5.93777	8.23515	7.29383	7.68704	9.23198	7.86241	coding	NM_020995	HPR	RefSeq_coding	1245	chr16	+	72097124	72111144	NM_005143,NM_001126102,	GTTTGAAGCTGATGGGTGCCAGCCCTGCATTGCTGAGTCAATCAATAAAGAGCTTTCTTT	3250	Hs.655361	GO:0003824|GO:0030492|GO:0004252|GO:0006508|GO:0005576|GO:0034366	NP_066275	Haptoglobin-related protein
ASHG19A3A043256	58.7997	77.4839	39.6849	33.6298	77.3079	113.043	73.7094	22.9723	63.4829	85.3668	42.0575	101.376	5.76236	6.1421	5.64272	5.36961	6.30253	6.59099	6.28582	5.28665	5.51166	6.27345	5.47455	6.22877	coding	NM_001011663	PCGF6	RefSeq_coding	2248	chr10	-	105062553	105110891	ENST00000443755,	AGAATCAGTGTTTCGTATTCCACCTGAACTTGATATGTCTTTATTACTGGAGTTCATTGG	84108	Hs.335808	GO:0003677|GO:0046872|GO:0003700|GO:0008270|GO:0006351|GO:0031519|GO:0005634	NP_115530	Polycomb group ring finger 6
ASHG19A3A006773	2710.84	2989.52	2277.22	1617.42	2897.79	2772.67	2233.43	1139.89	3541.09	2097.32	2737.68	3398.79	11.2883	11.5742	11.2567	10.9767	11.5939	11.2429	11.2986	10.776	11.402	10.9414	11.2028	11.5163	coding	NM_198291	SRC	RefSeq_coding	4044	chr20	+	35974556	36033819		TGAGCCCGCCCGCCCGCCGGCCCAGAACAGAGAACAGAAGCTCAGAGAAGTGAAGCAACT	6714	Hs.195659	GO:0005524|GO:0042169|GO:0005070|GO:0050839|GO:0020037|GO:0005158|GO:0005178|GO:0016301|GO:0004715|GO:0000166|GO:0008022|GO:0005515|GO:0005080|GO:0004672|GO:0004672|GO:0004713|GO:0004713|GO:0005102|GO:0016740|GO:0007265|GO:0031295|GO:0007411|GO:0007596|GO:0045453|GO:0060444|GO:0034329|GO:0008283|GO:0016337|GO:0016044|GO:0071398|GO:0071456|GO:0032869|GO:0071222|GO:0071445|GO:0007173|GO:0008543|GO:…	NP_938033	V-src sarcoma (Schmidt-Ruppin A-2) viral oncogene homolog (avian)
ASHG19A3A012225	93.419	64.4485	108.765	70.8886	114.069	81.0874	97.7456	59.2295	203.229	56.6636	111.682	93.0071	6.43858	5.8602	7.00227	6.54271	6.85633	6.11052	6.69144	6.67638	7.10232	5.67015	6.76577	6.09249	coding	NM_000527	LDLR	RefSeq_coding	5265	chr19	+	11200056	11244503		AGTATTTTGGACAGATATCATCAACGAAGCCATTTTCAGTGCCAACCGCCTCACAGGTTC	3949	Hs.728190	GO:0005509|GO:0005041|GO:0005515|GO:0004872|GO:0030229|GO:0007568|GO:0042632|GO:0008203|GO:0030301|GO:0006897|GO:0044419|GO:0030299|GO:0006629|GO:0006869|GO:0042159|GO:0042157|GO:0034383|GO:0006898|GO:0032355|GO:0033762|GO:0009725|GO:0008202|GO:0006810|GO:0005901|GO:0030669|GO:0030669|GO:0005905|GO:0005769|GO:0010008|GO:0010008|GO:0009897|GO:0005887|GO:0034362|GO:0005764|GO:0005886|GO:0005886	NP_001182732	Low density lipoprotein receptor
ASHG19A3A014781	7957.9	5974.34	3193.18	33714.4	1808.65	10687.1	3429.65	9540.31	2713.07	3751.61	2531.22	11033.7	12.8842	12.5292	11.7573	15.0855	10.877	13.2178	11.9541	13.397	10.9599	11.7836	11.0955	13.1599	coding	NM_139266	STAT1	RefSeq_coding	2798	chr2	-	191840262	191878976		CAGCTGAACTTGTTGAGATCCCCGTGTTACTGCCTATCAGCATTTTACTACTTTAAAAAA	6772	Hs.642990	GO:0003677|GO:0005509|GO:0005515|GO:0043565|GO:0003700|GO:0004871|GO:0007249|GO:0007259|GO:0006919|GO:0008015|GO:0032869|GO:0019221|GO:0006917|GO:0060333|GO:0044419|GO:0031663|GO:0048661|GO:0060334|GO:0006355|GO:0060338|GO:0009617|GO:0051591|GO:0034097|GO:0042493|GO:0043330|GO:0042542|GO:0032496|GO:0009612|GO:0007584|GO:0014070|GO:0043434|GO:0009615|GO:0007165|GO:0006366|GO:0060337|GO:0007260|GO:…	NP_644671	Signal transducer and activator of transcription 1, 91kDa
ASHG19A3A006942	14553.1	3050.16	10618.7	5986.42	7872.89	7766.63	6052.64	1998.96	14758.6	4208.47	13652.1	6238.21	13.8518	11.6026	13.5761	12.6997	13.1425	12.7406	12.8242	11.4888	13.6916	11.9496	13.6768	12.3554	coding	NM_201995	SF1	RefSeq_coding	3154	chr11	-	64532075	64546316		CACCGCCTGGTTCCGCCGGCATGATGATCCCTCCCCGCGGCGGCGATGGCCCGAGCCATG	7536	Hs.502829	GO:0003723|GO:0003702|GO:0046872|GO:0003676|GO:0005515|GO:0003714|GO:0008270|GO:0008380|GO:0000389|GO:0000398|GO:0000245|GO:0005730|GO:0005634|GO:0005634|GO:0005840|GO:0005681	NP_973727	Splicing factor 1
ASHG19A3A017594	1923.43	3217.23	2010.51	3803.07	1798.08	1582.92	1810.85	1835.71	2042	2864.24	1811.21	1334.35	10.7873	11.6695	11.0632	12.077	10.8671	10.4275	10.9697	11.38	10.4978	11.3758	10.5725	10.1906	coding	NM_178026	GGT7	RefSeq_coding	2640	chr20	-	33432523	33460661		GTGGGCACCAGCTCAGGGGCTTCCATTTGCAAAGGGAAATTAAAGAAAGAATGTTGCTTA	2686	Hs.433738	GO:0008415|GO:0003840|GO:0016740|GO:0006750|GO:0016021|GO:0016020	NP_821158	Gamma-glutamyltransferase 7
ASHG19A3A052488	181.496	132.351	59.9952	21.2348	203.792	242.393	172.782	33.6305	114.86	111.401	148.05	165.442	7.39231	6.97055	6.18771	4.63604	7.6661	7.70682	7.51662	5.84239	6.32842	6.66651	7.134	6.97935	coding	NM_025238	BTBD1	RefSeq_coding	3308	chr15	-	83685182	83736106		GTTGGATTTGGCTTGTATGGATCTATTCATGGCCCTACAGATTATCAAGTGAATATACAG	53339	Hs.459149	GO:0005515|GO:0008150|GO:0005737|GO:0000932|GO:0043234	NP_079514	BTB (POZ) domain containing 1
ASHG19A3A049676	11183.2	24740	8238.28	10962	8317.69	12502.7	11300.7	11517.5	8203.69	25248.8	13442.3	9553.3	13.3979	14.2454	13.2021	13.5449	13.2255	13.4381	13.7866	13.6359	12.7142	14.3721	13.645	12.9671	coding	NM_138444	KCTD12	RefSeq_coding	6255	chr13	-	77454303	77460540		ACTAGCTACTGTTTTCCTTCCTGTGTGTGAAGTAATGAATCATTGATTATGTGACTTGTT	115207	Hs.644125	GO:0005515|GO:0005249|GO:0006813|GO:0030054|GO:0005886|GO:0045211|GO:0042734|GO:0045202|GO:0008076	NP_612453	Potassium channel tetramerisation domain containing 12
ASHG19A3A051802	920.593	1715.8	798.622	1184.2	1160.69	1364.68	1024.21	768.22	779.868	1346.6	911.313	892.255	9.71424	10.8016	9.73822	10.5705	10.1952	10.2272	10.0992	10.2885	9.01744	10.3223	9.58014	9.56727	coding	NM_178587	PPP2R5C	RefSeq_coding	1623	chr14	+	102276139	102378960		GGGGGGTCTCGATTTCACTAACGTTGTATATGAAAATGTCTGCAATAAAAAGTACTTTTA	5527	Hs.368264	GO:0005515|GO:0008601|GO:0008601|GO:0006977|GO:0042771|GO:0008285|GO:0043161|GO:0007165|GO:0000775|GO:0005634|GO:0000159|GO:0000159	NP_848702	Protein phosphatase 2, regulatory subunit B', gamma
ASHG19A3A030386	85.8727	91.152	62.7876	73.3546	121.673	117.328	76.8035	59.6401	143.501	108.006	97.6308	131.677	6.31884	6.39829	6.24577	6.59846	6.94271	6.64268	6.34226	6.68612	6.62342	6.61884	6.58544	6.63697	coding	NM_002912	REV3L	RefSeq_coding	10719	chr6	-	111620234	111804414		TGTGATTGCATATAACTACTGCTTTTCCACCTGCCTTGGCCATGTGGAGAACTTGGGAAA	5980	Hs.232021	GO:0003677|GO:0003887|GO:0046872|GO:0000166|GO:0016779|GO:0016740|GO:0006281|GO:0006261|GO:0006139|GO:0019985|GO:0005634|GO:0016035	NP_002903	REV3-like, catalytic subunit of DNA polymerase zeta (yeast)
ASHG19A3A051925	55.2117	60.2992	48.6222	47.9482	56.9157	54.2389	60.3862	33.7356	61.0303	69.781	38.0495	211.414	5.67402	5.7589	5.91624	5.9298	5.8705	5.51376	5.99629	5.84663	5.45993	5.98307	5.33741	7.35902	coding	NM_024490	ATP10A	RefSeq_coding	5235	chr15	-	25923861	26108349		TTTTGTTTTTCACCGTGGCTTTGATTTACAATGCGTCTTGTGCCACGTGCTATCCTCCGT	57194	Hs.659258	GO:0005524|GO:0015662|GO:0016787|GO:0016820|GO:0000287|GO:0000166|GO:0004012|GO:0004012|GO:0006754|GO:0034220|GO:0034220|GO:0015914|GO:0008360|GO:0055085|GO:0016021|GO:0005886	NP_077816	ATPase, class V, type 10A
ASHG19A3A052504	2426.11	4967.6	2547.58	26330.8	2673.64	7773.96	1998.73	4693.17	2158.07	8706.22	2946.45	5731.57	11.1178	12.2535	11.4199	14.7689	11.4656	12.7416	11.1295	12.5689	10.5989	12.9859	11.3253	12.2437	coding	NM_021077	NMB	RefSeq_coding	1046	chr15	-	85198361	85201802		TCCTGCTGTATTTCCTGCTTCCCTGTTGAATTGGTGAATAAAACCTTGCTCTTTACATAC	4828	Hs.386470	GO:0005179|GO:0007267|GO:0007218|GO:0007165|GO:0005576|GO:0005576|GO:0005625	NP_995580	Neuromedin B
ASHG19A3A002818	171.703	135.417	147.738	113.319	148.012	195.421	129.341	91.3696	166.29	120.283	121.673	151.556	7.31418	7.00316	7.42344	7.26861	7.20786	7.38453	7.09779	7.3194	6.82529	6.77318	6.87613	6.84229	coding	NM_001145404	ZNF506	RefSeq_coding	3245	chr19	-	19903519	19932560		GAACTACAGAAACCTGATCTTCCTTGTTATGTATTCTCATTTTGCCCAAGACCTTTGGTC	440515	Hs.351906	GO:0003677|GO:0046872|GO:0008270|GO:0006355|GO:0005622|GO:0005730|GO:0005634	NP_001138876	Zinc finger protein 506
ASHG19A3A003075	116.126	205.625	96.8209	156.429	120.548	194.697	120.812	163.397	195.554	219.195	149.707	328.631	6.74934	7.67104	6.84312	7.75369	6.92958	7.37918	6.99744	8.172	7.0528	7.65628	7.14858	8.02934	coding	NM_001160418	ZBP1	RefSeq_coding	2102	chr20	-	56178903	56195632		GCTCCTGCTGACCCGGGCAGAGAAGCCGAGAGGCCCCAGCAACATGCAGCTACAATTCCA	81030	Hs.302123	GO:0003677|GO:0003723|GO:0003726|GO:0003692|GO:0008150|GO:0005575	NP_110403	Z-DNA binding protein 1
ASHG19A3A008778	448.265	1284.1	182.341	228.325	389.282	921.953	491.483	305.172	693.821	1046.48	326.502	1130.18	8.67032	10.4011	7.69859	8.31515	8.59851	9.66909	9.02964	9.04095	8.84263	9.9536	8.17864	9.94852	coding	NM_005717	ARPC5	RefSeq_coding	2000	chr1	-	183595332	183604985		AAAGGATTTGAGAGCCCGTCTGACAATAGCAGTGCTATGTTACTGCAATGGCATGAAAAG	10092	Hs.518609	GO:0003779|GO:0005515|GO:0005200|GO:0030036|GO:0006928|GO:0030833|GO:0005885|GO:0015629|GO:0042995|GO:0005737	NP_005708	Actin related protein 2/3 complex, subunit 5, 16kDa
ASHG19A3A015531	849.231	306.231	565.134	349.42	480.65	606.289	367.98	183.51	690.952	369.926	695.627	481.594	9.59924	8.2701	9.25142	8.92839	8.91402	9.05178	8.60947	8.33372	8.83621	8.40249	9.20316	8.61777	coding	NM_001170791	FAM82A1	RefSeq_coding	1858	chr2	+	38152461	38244884		GCGCCAGCAGGTCCTGGTCTCCGCTCTCCAACAGCTGAAAGGCCGGCGCAGTGAACACAG	151393	Hs.591566	GO:0005488|GO:0005737|GO:0005856|GO:0016021|GO:0016020|GO:0005874|GO:0000922	NP_653314	Family with sequence similarity 82, member A1
ASHG19A3A001573	201.571	183.192	277.358	204.586	214.803	200.041	210.894	151.945	405.865	214.581	383.516	295.653	7.5411	7.47973	8.28078	8.15451	7.74278	7.41936	7.7987	8.06965	8.06538	7.62142	8.40083	7.86748	coding	NM_001080124	CASP8	RefSeq_coding	2750	chr2	+	202098165	202152434	NM_033355,	TGCCTGTACCCCGCCAACAGCTTCAGAAGAAGGAGCAGCCCCTGGGTGCGTCCACTTTCT	841	Hs.599762	GO:0004197|GO:0008234|GO:0042802|GO:0008233|GO:0005515|GO:0006919|GO:0008633|GO:0008633|GO:0006915|GO:0006915|GO:0006921|GO:0071260|GO:0008624|GO:0008624|GO:0008624|GO:0008629|GO:0043123|GO:0006508|GO:0051603|GO:0042981|GO:0034612|GO:0005813|GO:0005737|GO:0005856|GO:0005829|GO:0005829|GO:0031264|GO:0005741|GO:0005739|GO:0005730|GO:0005634	NP_203522	Caspase 8, apoptosis-related cysteine peptidase
ASHG19A3A012705	67.0018	82.3213	69.1095	86.3626	79.3231	95.0387	61.2175	63.6051	92.7757	114.638	79.7726	111.844	5.9504	6.23983	6.37932	6.85445	6.34141	6.3407	6.01839	6.7817	6.04552	6.702	6.31838	6.38306	coding	NM_000766	CYP2A13	RefSeq_coding	1747	chr19	+	41594367	41602098	NM_000762,	ACTTCCTGGATAAGAAGGGGCAGTTTAAGAAGAGTGATGCTTTTGTGCCCTTTTCCATCG	1553	Hs.567252	GO:0070330|GO:0008389|GO:0009055|GO:0020037|GO:0046872|GO:0055114|GO:0006805|GO:0005783|GO:0005789|GO:0016020|GO:0005792	NP_000757	Cytochrome P450, family 2, subfamily A, polypeptide 13
ASHG19A3A034712	213.661	246.744	206.842	146.506	262.841	263.296	192.765	121.748	285.691	284.526	305.043	269.097	7.61855	7.94701	7.8758	7.66217	8.03258	7.82999	7.6694	7.73905	7.57493	8.03169	8.09025	7.73078	coding	NM_017667	CCDC132	RefSeq_coding	3625	chr7	+	92861652	92988337		ACATCTGGATGCTGTGATGCCTGCAGTCAAAAAGCCCTTTCTTCAGCAGTTCTATTCTCA	55610	Hs.222282		NP_078829	Coiled-coil domain containing 132
ASHG19A3A018049	2150.62	4761.49	2155.8	2004.56	1958.05	2918.02	1812.41	1106.69	2262.16	1572.95	1440.62	3213.74	10.9484	12.1973	11.1637	11.2537	11.0035	11.3177	10.9701	10.7399	10.6723	10.5365	10.2232	11.4384	coding	NM_005839	SRRM1	RefSeq_coding	3952	chr1	+	24969593	24999771		TATACAACTTTCAGAGCCTCTTGTATTTGGAAGGCTGGAAGGGCCCAGACTTTGGAATAG	10250	Hs.18192	GO:0003677|GO:0003723|GO:0005515|GO:0008380|GO:0000375|GO:0010467|GO:0031124|GO:0006406|GO:0000398|GO:0000398|GO:0006369|GO:0006366|GO:0071013|GO:0005829|GO:0016363|GO:0016607|GO:0005654|GO:0005634	NP_005830	Serine/arginine repetitive matrix 1
ASHG19A3A012910	26270.6	25373.7	32724.7	27208	27206.8	20855.1	18303.2	22818.3	27786.3	24411.8	31405.1	21118.9	14.8356	14.2824	15.3808	14.8041	15.1367	14.111	14.5099	14.4323	14.7702	14.3267	15.2199	14.0296	coding	NM_017432	PTOV1	RefSeq_coding	1884	chr19	+	50354415	50363999		GGCCTCCAAGGACGGTCCCCACCCCTCTACGTTTCCCCAATAAAGCCTTTTAAAAACCTG	53635	Hs.587979	GO:0005737|GO:0005634|GO:0048471|GO:0005886	NP_059128	Prostate tumor overexpressed 1
ASHG19A3A044846	67.514	53.9473	80.8409	56.2194	76.1069	75.8056	48.6687	42.3769	73.8839	65.7188	57.886	64.8985	5.9637	5.59191	6.59421	6.17819	6.28124	6.00736	5.69198	6.17917	5.72629	5.89366	5.90204	5.53229	coding	NM_001005567	OR51B5	RefSeq_coding	939	chr11	-	5363815	5364754		ACCAAGCAGATTCAGAATGCCATTCTTCACCTTTTTACTACCCATAGAATTGGAACCTGA	282763	Hs.690458	GO:0004984|GO:0004872|GO:0050896|GO:0007608|GO:0016021|GO:0005886	NP_001005567	Olfactory receptor, family 51, subfamily B, member 5
ASHG19A3A026249	362.1	128.093	530.264	154.625	481.572	132.128	367.181	293.4	1116.66	306.954	906.892	248.136	8.37311	6.91413	9.16429	7.74013	8.91766	6.81565	8.60501	8.98926	9.53777	8.14115	9.57399	7.60132	coding	NM_006174	NPY5R	RefSeq_coding	1936	chr4	+	164265090	164273084		AAAGGCTATCGGTAACAACTGACCTGCCACAAAGTTAGAAGAAAGGATTGATTCAAGAAA	4889	Hs.519058	GO:0004930|GO:0004983|GO:0001602|GO:0001601|GO:0004872|GO:0007186|GO:0003214|GO:0042755|GO:0060112|GO:0014050|GO:0032229|GO:0003151|GO:0002675|GO:0045768|GO:0048661|GO:0007268|GO:0005737|GO:0005887|GO:0005886|GO:0005886	NP_006165	Neuropeptide Y receptor Y5
ASHG19A3A038817	5409.91	7517.08	5388.03	8048.2	6503.88	8023.01	5790.49	7573.98	4607.43	7119.08	5129.59	6151.36	12.3281	12.8511	12.5249	13.0956	12.8421	12.7939	12.7585	13.1409	11.8186	12.6951	12.1531	12.3364	coding	NM_017971	MRPL20	RefSeq_coding	749	chr1	-	1337276	1342693		CACAGATGATGTCCATGTTTTGTGTGAATGAAACTCAAACACTCTTCAGTTTTTAGAGTC	55052	Hs.182698	GO:0019843|GO:0003735|GO:0006412|GO:0005622|GO:0005762|GO:0005739|GO:0005840	NP_060441	Mitochondrial ribosomal protein L20
ASHG19A3A032342	864.286	496.177	1227.36	605.498	1050.71	1048.36	1034.57	709.889	3450.41	856.792	2150.91	1086.6	9.62838	8.99644	10.3492	9.66458	10.0409	9.85667	10.1125	10.1828	11.3591	9.67083	10.8415	9.88795	coding	NM_030615	KIF25	RefSeq_coding	1510	chr6	+	168418552	168445769		ACCGTGGCCATGCCCCGTACCGGAACAGCAGGCTCACCCACCTCCTTCAGGACTGCCTCG	3834	Hs.150013	GO:0005524|GO:0003777|GO:0000166|GO:0007018|GO:0000070|GO:0006996|GO:0005737|GO:0005856|GO:0005871|GO:0005874	NP_085118	Kinesin family member 25
ASHG19A3A032240	247.1	124.362	342.785	164.285	309.822	147.991	269.97	213.928	874.285	214.967	560.518	258.063	7.81892	6.87048	8.56773	7.83427	8.27508	6.9808	8.15181	8.54523	9.18394	7.62497	8.90597	7.6661	coding	NM_001145279	OPRM1	RefSeq_coding	2738	chr6	+	154331635	154440594		GTGCCCAGTGAAGAGACCTACTCCTTGGATCGCTTTGCGCAAAATCCACCCCTTTTCCCT	4988	Hs.2353	GO:0004930|GO:0004988|GO:0005515|GO:0004872|GO:0007187|GO:0007191|GO:0002438|GO:0007610|GO:0031635|GO:0007626|GO:0008285|GO:0032100|GO:0060079|GO:0051930|GO:0042220|GO:0032094|GO:0070848|GO:0032496|GO:0043278|GO:0007600|GO:0042060|GO:0005794|GO:0032839|GO:0032590|GO:0005783|GO:0005925|GO:0005887|GO:0044424|GO:0005624|GO:0045121|GO:0043204|GO:0005886|GO:0005886|GO:0042383	NP_001138759	Opioid receptor, mu 1
ASHG19A3A010097	819.51	309.326	484.279	353.039	445.185	456.375	359.269	238.975	925.411	414.673	741.574	527.488	9.54707	8.28258	9.04609	8.94138	8.7975	8.63152	8.5699	8.70071	9.26661	8.57603	9.3039	8.75783	coding	NM_005993	TBCD	RefSeq_coding	4449	chr17	+	80709939	80901060		ATAAATGACACTTTGAGACATCTCCATCTCATCTCAAGTCACTCCCGCCAGCAGATGAAG	6904	Hs.728173	GO:0005096|GO:0005096|GO:0048487|GO:0051087|GO:0005515|GO:0051084|GO:0034333|GO:0044267|GO:0010812|GO:0031115|GO:0007023|GO:0006457|GO:0006457|GO:0070830|GO:0005912|GO:0030054|GO:0005737|GO:0016328|GO:0005874|GO:0005886|GO:0005923	NP_005984	Tubulin folding cofactor D
ASHG19A3A048097	764.139	1696.72	107.855	146.631	1117.18	675.894	826.879	76.7505	548.413	73.301	605.101	1462.11	9.44448	10.7822	6.99082	7.66295	10.1365	9.22016	9.78089	7.05963	8.50658	6.05502	9.00957	10.3272	coding	NM_003769	SFRS9	RefSeq_coding	1204	chr12	-	120899471	120907558		TATTTATGGAAGAAATGGTTATGATTATGGCCAGTGTCGGCTTCGTGTGGAGTTCCCCAG	8683	Hs.706889	GO:0003723|GO:0000166|GO:0008380|GO:0010467|GO:0031124|GO:0006406|GO:0006397|GO:0006376|GO:0000398|GO:0006369|GO:0006366|GO:0005654|GO:0005634	NP_003760	Serine/arginine-rich splicing factor 9
ASHG19A3A039528	19833.5	22427	17758.8	9623.06	21672.1	17506.6	15746	15847.6	23477.5	18696.5	18696.2	13481.6	14.3656	14.111	14.4523	13.3648	14.7365	13.8899	14.2894	14.0449	14.4795	14.0237	14.2729	13.4456	coding	NM_001636	SLC25A6	RefSeq_coding	1502	chrX	-	1505044	1511039	uc004fph.2,	AAACAAAAGAATCACGTTTTCCCATTTGTACTTCAGCGCTAGCCCCTGTTTTGCACAGCC	293	Hs.350927	GO:0005471|GO:0005515|GO:0005215|GO:0046732|GO:0006915|GO:0006112|GO:0044419|GO:0050796|GO:0055085|GO:0019058|GO:0016032|GO:0019048|GO:0016021|GO:0016020|GO:0005743|GO:0005743|GO:0005744|GO:0005739	NP_001627	Solute carrier family 25 (mitochondrial carrier; adenine nucleotide translocator), member 6
ASHG19A3A020597	293.168	263.505	193.434	258.605	285.378	313.808	232.164	190.759	755.796	407.312	462.8	542.708	8.07377	8.04543	7.78266	8.50398	8.15522	8.08618	7.93807	8.38718	8.97328	8.54884	8.65129	8.80438	coding	NM_015381	FAM19A5	RefSeq_coding	2652	chr22	+	48972117	49147742		CAGGGGCCGCGCTCTGCTGCTTCCTCGTCCTAGTGATCCACGCGCAGTTCCTCAAAGAAG	25817	Hs.436854	GO:0005576|GO:0016021|GO:0016020	NP_056196	Family with sequence similarity 19 (chemokine (C-C motif)-like), member A5
ASHG19A3A044808	139.671	78.3104	226.622	94.952	233.491	96.6523	206.283	115.487	803.855	139.159	359.715	220.964	7.01458	6.15762	8.00011	7.003	7.86338	6.3678	7.76658	7.66341	9.06281	6.97882	8.31491	7.42658	coding	NM_144663	C11orf40	RefSeq_coding	654	chr11	-	4592653	4599050		TTAACTTAGATAAGGATGTGTTCATACACCAGGCCAACCACCCACTAACAGTGCCGTCTA	143501	Hs.350556		NP_653264	Chromosome 11 open reading frame 40
ASHG19A3A022603	9109.92	9750.42	9307.26	9504.01	8664.66	7964.37	9710.07	9644.21	10798.8	11207.7	9355.64	4822.56	13.1056	13.1587	13.3901	13.3419	13.2954	12.7798	13.567	13.4103	13.1663	13.3388	13.0828	11.9998	coding	NM_018031	WDR6	RefSeq_coding	4273	chr3	+	49044636	49053386		TGAAATCCATGCTGAGCTGTACCAGGAACTTGCATATCTAGAGACAGAGACTGAGTCACT	11180	Hs.654815	GO:0043560|GO:0005515|GO:0007049|GO:0007050|GO:0008285|GO:0005737|GO:0043234|GO:0005625	NP_060501	WD repeat domain 6
ASHG19A3A010936	2682.21	5011.84	2506.4	3037.44	2107.16	3549.58	2498.36	5162.69	3349.94	4483.38	2835.89	3635.22	11.2723	12.2726	11.3923	11.7926	11.1159	11.6048	11.4751	12.7031	11.3169	12.0311	11.2579	11.6171	coding	NM_002096	GTF2F1	RefSeq_coding	2551	chr19	-	6379579	6393291		AAGATGATCAACGACAAAATGCACTTCTCCCTCAAGGAGTGAGGCTTGGTCCAATACATG	2962	Hs.68257	GO:0003677|GO:0003824|GO:0016251|GO:0019211|GO:0005515|GO:0016563|GO:0003713|GO:0008134|GO:0008380|GO:0010467|GO:0006370|GO:0000398|GO:0050434|GO:0009615|GO:0006368|GO:0006368|GO:0006366|GO:0006367|GO:0006367|GO:0016032|GO:0030054|GO:0005654|GO:0005654|GO:0005634|GO:0005674	NP_002087	General transcription factor IIF, polypeptide 1, 74kDa
ASHG19A3A005581	117.806	118.337	80.3127	122.999	132.296	136.709	108.033	100.432	247.108	216.413	184.355	235.424	6.7684	6.79806	6.58485	7.39483	7.06022	6.86584	6.83871	7.46193	7.37027	7.63548	7.41732	7.52195	coding	NM_033044	MACF1	RefSeq_coding	19271	chr1	+	39796809	39952789		GAACCTCTGCCTCCAACAGTATGAGGATTTGAAACAGCCCATGGCTGAAAGGAAAGCTCA	23499	Hs.472475	GO:0003779|GO:0051015|GO:0005509|GO:0005509|GO:0008017|GO:0005515|GO:0008150|GO:0007050|GO:0005737|GO:0005737|GO:0005856|GO:0005856	NP_149033	Microtubule-actin crosslinking factor 1
ASHG19A3A053955	568.306	196.452	413.774	260.468	492.175	675.772	525.531	169.397	744.208	399.171	909.68	477.448	9.02346	7.59746	8.82858	8.51221	8.94909	9.21996	9.11941	8.21666	8.95045	8.5163	9.57838	8.60776	coding	NM_001077419	TMEM231	RefSeq_coding	3034	chr16	-	75572016	75590170		ATTGTGTATTTACAGAAGTGATGTGGATTCCTCCCAGACTCATTAGTGACCAGGGCTGCT	79583	Hs.156784	GO:0016021|GO:0016020	NP_001070887	Transmembrane protein 231
ASHG19A3A052299	84.7892	62.155	57.8122	26.9476	85.1982	82.8384	90.1917	36.3583	179.38	91.6423	117.55	66.8729	6.29823	5.80608	6.14331	5.0157	6.4398	6.14196	6.57451	5.95709	6.93223	6.3757	6.83014	5.58139	coding	NM_006049	SNAPC5	RefSeq_coding	785	chr15	-	66782665	66790146		AACAAAACCCACCAGGAAGGAAAATCCAAGAGTTTCAGGTCTAGAGCTTGTGCTGCACTT	10302	Hs.30174	GO:0003700|GO:0006366|GO:0006383|GO:0006384|GO:0005654|GO:0005634	NP_006040	Small nuclear RNA activating complex, polypeptide 5, 19kDa
ASHG19A3A044744	110.86	116.299	149.847	126.114	129.767	197.007	139.596	110.992	171.465	122.941	157.983	153.138	6.68361	6.77062	7.44275	7.43348	7.03329	7.39694	7.20866	7.60945	6.8689	6.8089	7.21277	6.85825	coding	NM_001005922	KRTAP5-1	RefSeq_coding	942	chr11	-	1605571	1606513		ATTTCTGGCTTTGCAGGACTCTTACCATGGCCAGGCATTCCTGCCCAGCCTTTACCTCCT	387264	Hs.632147	GO:0045095	NP_001005922	Keratin associated protein 5-1
ASHG19A3A025140	94.5211	71.6091	90.0412	60.283	82.5375	80.6383	78.8306	56.6544	100.292	79.4375	83.5195	95.8694	6.45377	6.02158	6.74089	6.28925	6.39709	6.10032	6.37857	6.60956	6.14832	6.16853	6.37932	6.13753	coding	NM_000283	PDE6B	RefSeq_coding	3414	chr4	+	619362	664680		TTTGCTGACGAGCTCACTGACTACAAGACAAAGAATATGCTGGCCACACCCATCATGAAT	5158	Hs.654544	GO:0047555|GO:0016787|GO:0046872|GO:0008081|GO:0046037|GO:0007596|GO:0051480|GO:0009583|GO:0007603|GO:0030168|GO:0050896|GO:0007165|GO:0007601|GO:0005829|GO:0016020	NP_001138764	Phosphodiesterase 6B, cGMP-specific, rod, beta
ASHG19A3A048365	6640.64	3406.82	5250.82	4247.6	9859.66	2393.51	7663.79	4137.52	8260.39	4117.04	9427.1	4135.77	12.6087	11.7487	12.4874	12.2296	13.505	11.0245	13.1786	12.406	12.7285	11.923	13.093	11.795	coding	NM_031412	GABARAPL1	RefSeq_coding	1885	chr12	+	10365488	10375722		CAAGTTCTTGTATAATGAAGTCAATGCCATCAGGCCAAGGAAATAAAATAATTGCTTACC	23710	Hs.524250	GO:0050811|GO:0048487|GO:0005515|GO:0005794|GO:0005776|GO:0005737|GO:0005856|GO:0005783|GO:0005622|GO:0016020|GO:0005874	NP_113600	GABA(A) receptor-associated protein like 1
ASHG19A3A048441	724.598	1539	482.486	366.128	873.597	1049.94	843.404	436.814	1202.04	1417.01	719.164	1778.26	9.36626	10.6403	9.03953	8.99463	9.78304	9.85872	9.80944	9.52029	9.64181	10.3886	9.25601	10.621	coding	NM_018686	CMAS	RefSeq_coding	1741	chr12	+	22199158	22218601		CAGTTGTAGATGAATGGAGAAAAGAAATGGGCCTGTGCTGGAAAGAAGTGGCATATCTTG	55907	Hs.311346	GO:0008781|GO:0016779|GO:0016740|GO:0009103|GO:0005634	NP_061156	Cytidine monophosphate N-acetylneuraminic acid synthetase
ASHG19A3A002710	67.6035	95.0787	45.6458	85.834	62.9006	89.0787	43.2183	61.3744	129.938	94.8589	83.7	158.138	5.96485	6.46211	5.8295	6.84415	6.00507	6.24577	5.51655	6.73186	6.49604	6.42856	6.38207	6.90697	coding	NM_001144911	CLEC4M	RefSeq_coding	1779	chr19	+	7828034	7834490	NM_001144904,	AGGGTGCAGCAGCTGGGCCTCCTGGGGTGTCTTGGCCATGGCGCCCTGGTGCTGCAACTC	10332	Hs.421437	GO:0030369|GO:0005537|GO:0046872|GO:0042605|GO:0004872|GO:0005529|GO:0046790|GO:0019882|GO:0009988|GO:0006897|GO:0045087|GO:0044419|GO:0035556|GO:0046795|GO:0007159|GO:0046968|GO:0019079|GO:0019062|GO:0019048|GO:0005737|GO:0005576|GO:0005887|GO:0016020|GO:0005886	NP_055072	C-type lectin domain family 4, member M
ASHG19A3A003102	6695.99	1122.73	5758.44	2368.06	4388.86	3473.61	3695.53	1269.8	7518.33	1799.61	6233.59	2478.83	12.6193	10.2198	12.6312	11.4725	12.2258	11.5688	12.0788	10.9006	12.574	10.7227	12.4429	11.0807	coding	NM_001161473	ALDH3B1	RefSeq_coding	2899	chr11	+	67776047	67796741		CCAGAAGACCTCACCGCCCTCCCAGGATGGACCCCCTTGGGGACACGCTGCGGCGACTGC	221	Hs.523841	GO:0004028|GO:0004030|GO:0016491|GO:0006066|GO:0006081|GO:0006629|GO:0055114	NP_001154945	Aldehyde dehydrogenase 3 family, member B1
ASHG19A3A005890	192.284	252.051	120.816	61.4619	304.859	378.107	228.31	20.3792	306.964	379.476	185.909	351.653	7.4763	7.97992	7.14984	6.3183	8.24827	8.35302	7.9132	5.10679	7.6735	8.4435	7.42735	8.13611	coding	NM_138740	C1orf43	RefSeq_coding	1753	chr1	-	154179182	154193273		CTACTACAACTGGAAACCCAGGGAAATCAAAAGATCCCATTTCATTCTGAAGGCCGGCAT	25912	Hs.287471	GO:0050662|GO:0016491|GO:0016021|GO:0016020	NP_620077	Chromosome 1 open reading frame 43
ASHG19A3A050745	124721	184474	102891	99021.3	89599.3	154353	92110.5	138720	105722	131129	88690.8	83730.5	17.1356	17.1008	17.0508	16.4539	16.8001	17.0238	16.8388	16.7713	16.8001	16.6771	16.8212	16.0709	coding	NM_001032	RPS29	RefSeq_coding	302	chr14	-	50050290	50053094		CTTCAGAGGATTATCCGGGGCATCTACTCAATGAAAAACCATGATAATTCTTTGTATATA	6235	Hs.156367	GO:0046872|GO:0005515|GO:0003735|GO:0008270|GO:0044267|GO:0031018|GO:0010467|GO:0006412|GO:0006412|GO:0006414|GO:0006415|GO:0019058|GO:0016032|GO:0019083|GO:0005737|GO:0005829|GO:0005829|GO:0022627|GO:0005622|GO:0015935	NP_001023	Ribosomal protein S29
ASHG19A3A045347	1203.26	1672.19	773.05	3400.64	712.124	2342.21	679.144	1890.27	475.142	1164.26	883.088	1521.2	10.1033	10.7556	9.6886	11.9496	9.48111	10.9958	9.49262	11.4192	8.2933	10.1064	9.53523	10.3891	coding	NM_138456	BATF2	RefSeq_coding	2142	chr11	-	64755416	64764517		TGGATACAGAACACAAGTCTTGGCACATATGTGATGGAAATAAAGTGTTTTGCAATCTTT	116071	Hs.124840	GO:0005515|GO:0046983|GO:0043565|GO:0003700|GO:0006355|GO:0005634	NP_612465	Basic leucine zipper transcription factor, ATF-like 2
ASHG19A3A022913	218.735	265.166	153.881	127.125	298.857	251.423	292.126	108.265	320.123	260.075	240.202	235.359	7.64962	8.05549	7.47818	7.44404	8.21973	7.76426	8.26602	7.57786	7.73242	7.90596	7.77649	7.52116	coding	NM_006100	ST3GAL6	RefSeq_coding	2107	chr3	+	98451571	98513234		GAAACGGAGAAATAAGATCCAGCCTTGTTTATCAAAGCCAGCTTTTGCCTCTCTGCTGAG	10402	Hs.148716	GO:0008373|GO:0006040|GO:0006664|GO:0006486|GO:0009249|GO:0005794|GO:0000139|GO:0030173|GO:0016021|GO:0016020	NP_006091	ST3 beta-galactoside alpha-2,3-sialyltransferase 6
ASHG19A3A006078	272.487	209.166	271.973	230.558	306.052	275.88	232.448	142.902	483.528	239.989	356.735	252.143	7.96165	7.69707	8.25144	8.33047	8.25481	7.8921	7.93943	7.98093	8.31792	7.78608	8.30363	7.62836	coding	NM_148176	PPIL2	RefSeq_coding	2736	chr22	+	22020272	22052201		GCAAGTACATCAACCCAGCAGCCACCGAGCAGCAGAGGAAGAGCCCTCAACCAGTGCCAC	23759	Hs.438587	GO:0016853|GO:0003755|GO:0004842|GO:0007596|GO:0050900|GO:0006457|GO:0000209|GO:0005796|GO:0005730|GO:0005634|GO:0005634|GO:0000151	NP_680481	Peptidylprolyl isomerase (cyclophilin)-like 2
ASHG19A3A052605	1368.58	2750.17	1118.64	1957.78	1131.05	1660.48	1437.56	3739.49	1296.23	2601.29	1202.55	4205.36	10.2743	11.4669	10.2217	11.2235	10.1561	10.5025	10.6164	12.2806	9.75607	11.2235	9.95384	11.8167	coding	NM_003090	SNRPA1	RefSeq_coding	1068	chr15	-	101821716	101835460		GCAAAGTGGAATCTATCAGCATTGTTGAAATGCTTAAGACTGCTGCTGATAATTTTGTAA	6627	Hs.528763	GO:0003723|GO:0005515|GO:0008380|GO:0010467|GO:0000398|GO:0000398|GO:0005686|GO:0071013|GO:0005654|GO:0005634|GO:0030532|GO:0005681	NP_003081	Small nuclear ribonucleoprotein polypeptide A'
ASHG19A3A000862	952.927	376.02	645.414	374.652	650.47	543.863	478.49	263.419	1106.56	390.557	811.397	511.682	9.76223	8.58942	9.43912	9.02309	9.35114	8.88878	8.99002	8.83541	9.5227	8.4835	9.42519	8.70677	coding	NM_001007551	CT45A5	RefSeq_coding	1321	chrX	-	134945650	134953994	NM_152582,NM_001017417,	GAGGTGCCGCCGTCTCTCCTCCAGCAAGGAAACAATGACCGATAAAACAGAGAAGGTGGC	441521	Hs.535081		NP_001165759	Cancer/testis antigen family 45, member A5
ASHG19A3A046645	481.043	728.135	528.899	1034.87	352.692	866.693	468.504	1459.88	478.332	624.559	514.247	1911.92	8.77547	9.58843	9.16047	10.3799	8.46015	9.58546	8.95845	11.0713	8.30277	9.18437	8.79035	10.7202	coding	NM_024036	LRFN4	RefSeq_coding	2546	chr11	+	66624875	66627945		GCTGCAGCCACCCACTGGGAGTCTTGTTTTTATTTATAATAAAATTGTTGGGGACACCTC	78999	Hs.209979	GO:0016021|GO:0016020	NP_076941	Leucine rich repeat and fibronectin type III domain containing 4
ASHG19A3A050821	1264.04	206.903	859.213	401.611	514.499	664.844	534.422	206.459	1082.44	295.832	881.824	325.099	10.172	7.68069	9.84816	9.11708	9.01009	9.19478	9.13939	8.49559	9.49072	8.0849	9.53281	8.00951	coding	NM_021728	OTX2	RefSeq_coding	2209	chr14	-	57267426	57277184		GCTGGCTATTTGGAATTTAAAGGATATTTGACTTTTTCTAACCTCCCATGAGGCTGTAAG	5015	Hs.288655	GO:0008190|GO:0046982|GO:0043565|GO:0003700|GO:0030528|GO:0009952|GO:0007411|GO:0001708|GO:0007417|GO:0009953|GO:0007492|GO:0042706|GO:0030900|GO:0042472|GO:0030901|GO:0007275|GO:0048663|GO:0009887|GO:0045944|GO:0040036|GO:0008589|GO:0006355|GO:0006351|GO:0005737|GO:0030426|GO:0005634	NP_758840	Orthodenticle homeobox 2
ASHG19A3A006027	326.484	159.144	251.014	165.243	187.065	243.679	169.007	116.315	265.282	154.489	255.157	191.891	8.23052	7.25775	8.13735	7.84372	7.54194	7.71716	7.48347	7.67561	7.46942	7.13516	7.85509	7.20786	coding	NM_145733	41155	RefSeq_coding	2469	chr22	+	42372930	42394223		CAATGACAATGGAGGCCTCCCTCCGGGAGAAGGCCTCCTGGGCACTGTCCTTCCACCTGT	55964	Hs.120483	GO:0005525|GO:0003674|GO:0000166|GO:0007049|GO:0000910|GO:0030054|GO:0005737|GO:0005856|GO:0031105|GO:0045202	NP_663786	Septin 3
ASHG19A3A045387	1278.85	3147.46	1128.05	2667.15	1814.44	2247.34	1369.15	828.28	2461.83	3281.57	1515.17	1418.83	10.1875	11.6431	10.2367	11.6313	10.8818	10.9373	10.5431	10.3755	10.8086	11.5693	10.3051	10.2831	coding	NM_006876	B3GNT1	RefSeq_coding	2077	chr11	-	66112843	66115161		AGTTCTTAGCTCTTGAACAGAAGCCTAAAATTCCTGGTTCTCTCAGGGCTTCGCCTTCAA	11041	Hs.8526	GO:0008532|GO:0016757|GO:0030311|GO:0005794|GO:0000139|GO:0030173|GO:0016021|GO:0016020	NP_006867	UDP-GlcNAc:betaGal beta-1,3-N-acetylglucosaminyltransferase 1
ASHG19A3A002976	50.947	54.2011	65.8795	36.4354	57.9864	73.9539	52.8478	29.699	105.137	56.5526	61.3958	78.8878	5.5597	5.59851	6.31125	5.49838	5.89481	5.97016	5.81175	5.65782	6.20967	5.66751	5.97768	5.83589	coding	NM_001146706	KDM5D	RefSeq_coding	5331	chrY	-	21867302	21906825		AAGATCTTGGACCTCTACAGCCTTAGTAAGCAATGTAACACACACCCGTTTGACAATGAG	8284	Hs.80358	GO:0003677|GO:0046872|GO:0003674|GO:0016491|GO:0016702|GO:0005515|GO:0008270|GO:0016568|GO:0055114|GO:0007283|GO:0005575|GO:0005622|GO:0005634	NP_004644	Lysine (K)-specific demethylase 5D
ASHG19A3A019598	3255.89	1034.76	2832.51	9402.78	2703.81	7026.91	1463.83	3318.98	2770.24	6767.73	1698.48	1366.46	11.5607	10.1029	11.5775	13.3197	11.4823	12.5814	10.6413	12.1238	10.9952	12.6287	10.48	10.2268	coding	NM_207644	C22orf36	RefSeq_coding	1240	chr22	-	24981590	24989035		AAATCCAGTGTAAATGCTCAGCCTGAGATTAAGGGGACAGAAGAATGGACTCATAGGTGG	388886	Hs.113314		NP_997527	Chromosome 22 open reading frame 36
ASHG19A3A000610	133.164	134.216	188.395	133.347	155.91	139.979	152.827	138.551	344.064	190.483	258.176	206.382	6.94891	6.98802	7.74259	7.51579	7.28425	6.90062	7.33092	7.92969	7.83134	7.44175	7.87295	7.32173	coding	NM_000759	CSF3	RefSeq_coding	1602	chr17	+	38171613	38174065		GCTCCAGGAGAAGCTGGTGAGTGAGTGTGCCACCTACAAGCTGTGCCACCCCGAGGAGCT	1440	Hs.2233	GO:0005125|GO:0019899|GO:0005130|GO:0008083|GO:0019221|GO:0030851|GO:0006955|GO:0007275|GO:0008284|GO:0005576|GO:0005615	NP_757374	Colony stimulating factor 3 (granulocyte)
ASHG19A3A040798	957.895	143.899	609.491	218.176	401.219	406.436	267.94	98.5506	504.672	206.714	577.274	186.673	9.7681	7.09588	9.35289	8.24969	8.6455	8.46005	8.14067	7.43513	8.38486	7.5611	8.94658	7.1662	coding	NM_002367	MAGEB4	RefSeq_coding	2266	chrX	+	30260056	30262295		TCCATTGTCTTCCCTCCATTAAGAGAAGACTTTAAGAGATGAGGGAGAGAGAGCCAGAGA	4115	Hs.113291		NP_002358	Melanoma antigen family B, 4
ASHG19A3A006125	65.6544	43.3945	38.1946	37.0647	45.8308	61.1021	36.1443	33.7559	65.9516	43.5479	56.2523	60.9537	5.91933	5.26853	5.58955	5.52647	5.58611	5.68457	5.25412	5.84731	5.56323	5.28736	5.86546	5.43227	coding	NM_152348	WDR81	RefSeq_coding	3821	chr17	+	1619816	1641893		TCGTTCCCAGAACCCAGCGCGCTCTGTGCTGGCGGGCGCAGAGGCCTCCCAGGAGGAGAG	124997	Hs.234572		NP_689561	WD repeat domain 81
ASHG19A3A014750	157.1	165.781	115.1	155.338	120.653	186.068	124.736	135.628	293.031	243.713	212.801	291.209	7.18358	7.32516	7.08157	7.74507	6.93042	7.31642	7.04533	7.89828	7.60979	7.80667	7.60744	7.84372	coding	NM_182521	ZSWIM2	RefSeq_coding	2446	chr2	-	187692206	187713897		TTATGCCAGGAATGTTTTGATAGCTGCTGCCATCTTTCCCACACGTTTACATTTCGTGAG	151112	Hs.375054	GO:0016874|GO:0046872|GO:0043621|GO:0004842|GO:0008270|GO:0000209|GO:0042981	NP_872327	Zinc finger, SWIM-type containing 2
ASHG19A3A012164	7716.16	5917.72	7087.72	8961.73	6299.09	5504.26	5820.55	5959.98	10318.2	6113.77	9020.37	5482.46	12.8421	12.5204	12.9409	13.2432	12.7903	12.2276	12.7644	12.8592	13.087	12.4874	13.0166	12.1854	coding	NM_004218	RAB11B	RefSeq_coding	1635	chr19	+	8455204	8469315	BX647356,	AGATTCTTTATACACTTTGTAAGATTTACGCCAAACCCCAGCTCTCGATCTCTTCTTCTC	9230	Hs.626404	GO:0019003|GO:0005525|GO:0003924|GO:0000166|GO:0006184|GO:0006184|GO:0007049|GO:0015031|GO:0007264|GO:0016023|GO:0005739|GO:0005886	NP_004209	RAB11B, member RAS oncogene family
ASHG19A3A002616	3830.56	1738.69	2676.57	1731.65	4949.27	4903.9	3368.87	620.863	4344.57	2534.61	3888.01	3484.64	11.8129	10.8169	11.4966	11.0637	12.4313	12.0652	11.9336	9.99898	11.7278	11.1902	11.7581	11.5509	coding	NM_001143680	GSTK1	RefSeq_coding	1022	chr7	+	142960521	142966221		GCTGTGGATGCGCGTCTGGTCAAGGGCTGCAGAGAAGGCTGGTATGTCTGCAGAACAAGC	373156	Hs.390667	GO:0004364|GO:0042802|GO:0005515|GO:0015035|GO:0016740|GO:0005622|GO:0043231|GO:0030288|GO:0005777	NP_057001	Glutathione S-transferase kappa 1
ASHG19A3A049683	123.771	226.037	49.1156	73.7261	87.9165	281.156	86.5186	63.8537	103.921	195.675	90.8511	137.025	6.84261	7.81742	5.93228	6.60416	6.4826	7.92101	6.51317	6.78866	6.1956	7.4813	6.49297	6.69392	coding	NM_001122659	EDNRB	RefSeq_coding	4320	chr13	-	78469615	78492966	NM_003991,	TATTAGCGTTTGCAGCGACTTGGCTCGGGCAGCTGACCCAAGTGTCCTGTCTTCCTTCCT	1910	Hs.82002	GO:0004930|GO:0001600|GO:0001600|GO:0001600|GO:0017046|GO:0004872|GO:0007200|GO:0007166|GO:0048484|GO:0048246|GO:0007194|GO:0032269|GO:0010553|GO:0010553|GO:0014043|GO:0007399|GO:0042310|GO:0014826|GO:0005887|GO:0005886|GO:0005886	NP_003982	Endothelin receptor type B
ASHG19A3A007056	706.15	758.831	620.372	699.625	649.665	726.46	571.166	681.103	1617.54	1158.38	1069.47	1414.73	9.33015	9.65241	9.38147	9.85205	9.34954	9.32112	9.24068	10.1215	10.1223	10.0995	9.80191	10.2792	coding	NM_212461	PRKAG1	RefSeq_coding	1756	chr12	-	49396055	49412592		GGTTGTATTTGATACGTCCCTGCAGTCCTGCCCCTGTGGATTTGCCTTTATGATTATTAC	5571	Hs.530862	GO:0016208|GO:0004691|GO:0008603|GO:0005515|GO:0019901|GO:0007050|GO:0006633|GO:0008286|GO:0045860|GO:0051291|GO:0006468|GO:0050790|GO:0046320|GO:0006110|GO:0007165|GO:0007283|GO:0031588|GO:0005829|GO:0005829|GO:0005634	NP_002724	Protein kinase, AMP-activated, gamma 1 non-catalytic subunit
ASHG19A3A012642	30873.2	32360.7	26251.3	33662.8	25978.2	30338.6	27138.8	47088.6	37117.8	26503.9	26924.5	30220.5	15.1287	14.5379	15.0379	15.0765	15.0894	14.6303	15.096	15.2665	15.2386	14.434	14.9484	14.5527	coding	NM_013234	EIF3K	RefSeq_coding	910	chr19	+	39109721	39127595	AF119846,	TCCAGCATCATGGCCTCCTCCCAGTAACTTCAGGTGTTTAATAAAGATGTGTTGACTCAG	27335	Hs.314359	GO:0005515|GO:0043022|GO:0003743|GO:0003743|GO:0044267|GO:0010467|GO:0006446|GO:0006412|GO:0006413|GO:0006413|GO:0005737|GO:0005829|GO:0005829|GO:0005852|GO:0005634	NP_037366	Eukaryotic translation initiation factor 3, subunit K
ASHG19A3A041313	187.55	163.988	138.023	137.475	226.723	173.255	151.844	116.53	316.176	157.975	184.034	312.111	7.43752	7.30752	7.33519	7.56601	7.81906	7.21432	7.32201	7.67747	7.71567	7.16564	7.41568	7.95254	coding	NM_177948	ARMCX3	RefSeq_coding	3318	chrX	+	100878350	100882831		TCGCCGCCCGCTTTCCAAGACATATGTCCCGCTTGCAGCCCATTTCGATGCTGCGAAACG	51566	Hs.592225	GO:0005488|GO:0016021|GO:0016020	NP_808817	Armadillo repeat containing, X-linked 3
ASHG19A3A040542	504.817	691.429	310.536	355.31	673.82	687.645	761.68	116.933	1239.61	701.828	537.506	1054.86	8.84741	9.51072	8.42943	8.95246	9.4054	9.24859	9.66035	7.68123	9.68925	9.36088	8.84925	9.83424	coding	NM_004344	CETN2	RefSeq_coding	1087	chrX	-	151995872	151999301		ATGATGATGAAACTGGGAAGATTTCGTTCAAAAATCTGAAACGCGTGGCCAAGGAGTTGG	1069	Hs.82794	GO:0005524|GO:0008026|GO:0031683|GO:0005509|GO:0003676|GO:0005515|GO:0000086|GO:0051301|GO:0007099|GO:0007067|GO:0000278|GO:0006289|GO:0032465|GO:0007283|GO:0071942|GO:0005814|GO:0005813|GO:0005813|GO:0005737|GO:0005856|GO:0005829|GO:0005622|GO:0005932|GO:0005634|GO:0032391	NP_004335	Centrin, EF-hand protein, 2
ASHG19A3A000609	89.6752	87.7403	63.7179	83.586	73.0498	93.2374	63.4085	73.4147	147.42	95.0793	77.376	192.426	6.37885	6.34118	6.26684	6.80474	6.22403	6.31578	6.06521	6.99623	6.66146	6.43127	6.27895	7.21189	coding	NM_000755	CRAT	RefSeq_coding	2766	chr9	-	131857074	131873070		GTTAGCCTTCGCTGCCAGGACCGTGGTGAAGCCTCTGGGCTTCCTGAAGCCCTTCTCCTT	1384	Hs.12068	GO:0008415|GO:0004092|GO:0016740|GO:0044255|GO:0015980|GO:0033540|GO:0033540|GO:0006631|GO:0006091|GO:0006810|GO:0005783|GO:0016020|GO:0005743|GO:0005739|GO:0005782|GO:0005777	NP_000746	Carnitine O-acetyltransferase
ASHG19A3A006680	48.1673	78.7599	48.0283	35.1556	54.5797	73.1817	44.999	41.5518	116.384	82.6163	55.9392	108.722	5.4821	6.16752	5.89829	5.44082	5.81619	5.95436	5.57586	6.14999	6.34566	6.22522	5.85831	6.33894	coding	NM_183245	INVS	RefSeq_coding	3370	chr9	+	102861510	103063426		GTTCCCTCTGTTGAGAAGTCCAGAGAGCTCCGACTGCAGATAATTCAGAGAGAACGAAGG	27130	Hs.558477	GO:0005516|GO:0005515|GO:0016055|GO:0060971|GO:0001822|GO:0090090|GO:0031016|GO:0009791|GO:0005737|GO:0005856|GO:0016020|GO:0005874|GO:0005634|GO:0005819	NP_899068	Inversin
ASHG19A3A021516	861.828	407.153	731.739	458.913	742.862	638.155	590.94	414.309	1805.94	781.737	1355.05	1030.33	9.62304	8.70697	9.61247	9.30352	9.54276	9.13355	9.28737	9.45436	10.3001	9.52555	10.1354	9.80022	coding	NM_001164475	SLC41A3	RefSeq_coding	1970	chr3	-	125725200	125820391		GAGACTGGACCCAGCTTTCCAGCTTTCTTCCCCTTTCCATAATTCTCCTGAAAGTGTAAG	54946	Hs.573007	GO:0008324|GO:0016021|GO:0005886	NP_060306	Solute carrier family 41, member 3
ASHG19A3A008197	379.279	307.653	267.517	229.976	355.539	455.703	366.903	286.602	575.564	411	544.617	549.764	8.4371	8.27654	8.22609	8.32573	8.47244	8.62872	8.60339	8.95446	8.57651	8.56145	8.86529	8.82155	coding	NM_139285	GAS2L2	RefSeq_coding	3025	chr17	-	34071536	34079897		CCCTGGCCATGCCCACCTGTTTCCATAACTCCCATAAGTTATTAAATGCATGTGATTCTG	246176	Hs.591194	GO:0007050|GO:0005737|GO:0005856	NP_644814	Growth arrest-specific 2 like 2
ASHG19A3A003129	256.197	199.046	157.134	141.515	201.9	256.398	157.557	121.689	296.042	244.761	220.181	317.555	7.87115	7.6228	7.50548	7.60765	7.65197	7.79162	7.3821	7.73852	7.62476	7.81378	7.65093	7.97818	coding	NM_001161780	PDP1	RefSeq_coding	4247	chr8	+	94929161	94938294		ATCGTTTGGTCTCCTGCCGTGCCCGGAGAATGTGTGTGTGTCCCGGGCCCAGACGAATTG	54704	Hs.22265	GO:0004741|GO:0016787|GO:0000287|GO:0004724|GO:0032403|GO:0006470|GO:0006090|GO:0010510|GO:0005759|GO:0005739|GO:0008287	NP_060914	Pyruvate dehyrogenase phosphatase catalytic subunit 1
ASHG19A3A017997	385.374	1359.97	256.362	192.94	204.234	506.301	278.952	592.602	412.421	1623.81	235.497	176.185	8.45954	10.4845	8.16488	8.06809	7.66924	8.79134	8.2019	9.94194	8.08987	10.5769	7.74842	7.07537	coding	NM_052970	HSPA12B	RefSeq_coding	3109	chr20	+	3713355	3733756		TTATTGTGGTGGAGGCAATTATGAGGGTAGCATTTCTTTCGAGACAAAACACCCGTCTGG	116835	Hs.516854	GO:0005524|GO:0000166	NP_443202	Heat shock 70kD protein 12B
CUST_3_PI418767722	6110.17	4374.09	5139.76	4245.38	6122.04	5654.97	4596.4	2767.1	6944.25	5084.98	6756.55	6140.07	12.4894	12.0818	12.4553	12.2276	12.7535	12.2772	12.4263	11.8881	12.4732	12.1933	12.5598	12.3343	coding	NM_002539	ODC1	RefSeq_coding	2062	chr2	-	10580507	10588453		CTGAACAAGCATTTGTAGCTTGTACAATGGCAGAATGGGCCAAAAGCTTAGTGTTGTGAC	4953	Hs.467701	GO:0016829|GO:0004586|GO:0005515|GO:0034641|GO:0006596|GO:0006595|GO:0006521|GO:0009615|GO:0005575|GO:0005829	NP_002530	Ornithine decarboxylase 1
ASHG19A3A021357	66797.7	114198	60565.8	126211	51478.8	56955	58304.9	73370.8	65264.4	73222.3	55185.1	50183.8	16.2468	16.2018	16.3072	16.7627	16.1682	15.5481	16.1929	15.8108	16.1598	15.8169	16.1426	15.2965	coding	NM_000986	RPL24	RefSeq_coding	579	chr3	-	101399933	101405563		CCCGAGTTGGTGGAAAACGCTAAACTGGCAGATTAGATTTTTAAATAAAGATTGGATTAT	6152	Hs.477028	GO:0003723|GO:0005515|GO:0003735|GO:0044267|GO:0031018|GO:0010458|GO:0010467|GO:0031575|GO:0021554|GO:0060041|GO:0031290|GO:0000027|GO:0006412|GO:0006414|GO:0006415|GO:0019058|GO:0016032|GO:0019083|GO:0005829|GO:0005829|GO:0022625|GO:0005840	NP_000977	Ribosomal protein L24
ASHG19A3A022373	83.6958	97.8745	44.4957	40.9333	70.6927	71.2158	110.072	80.1275	81.7064	74.8378	62.2159	77.2781	6.27992	6.50591	5.79416	5.68712	6.17608	5.91198	6.86475	7.12436	5.87192	6.08286	5.99766	5.8054	coding	NM_000965	RARB	RefSeq_coding	3142	chr3	+	25469833	25639420		TGTTTGACTGTATGGATGTTCTGTCAGTGAGTCCTGGGCAAATCCTGGATTTCTACACTG	5915	Hs.654490	GO:0003677|GO:0046872|GO:0005515|GO:0003708|GO:0043565|GO:0003700|GO:0003707|GO:0008270|GO:0048566|GO:0010467|GO:0034339|GO:0006355|GO:0048384|GO:0007165|GO:0005737|GO:0005654|GO:0005634	NP_057236	Retinoic acid receptor, beta
ASHG19A3A048295	487.148	19059.9	360.534	6789.53	191.542	10525.3	346.928	9527.17	525.778	11472.5	215.758	5074.07	8.79479	13.9402	8.63339	12.8671	7.57332	13.185	8.51903	13.3958	8.45049	13.3772	7.62706	12.0683	coding	NM_001975	ENO2	RefSeq_coding	2423	chr12	+	7023613	7032859		AGAATGGGAAGGGTCATAGAAAGGGCCTTGACATCAGTTCCTTTGTGTGTACTCACTGAA	2026	Hs.511915	GO:0016829|GO:0000287|GO:0004634|GO:0046982|GO:0042803|GO:0005975|GO:0006094|GO:0006006|GO:0006096|GO:0042493|GO:0032355|GO:0014070|GO:0005737|GO:0005829|GO:0005626|GO:0005622|GO:0043204|GO:0000015|GO:0001917|GO:0005886|GO:0005625|GO:0019717	NP_001966	Enolase 2 (gamma, neuronal)
ASHG19A3A019309	302.963	631.487	332.554	225.562	446.963	680.638	434.211	853.16	467.781	1072.47	531.676	705.689	8.11967	9.36743	8.52448	8.29871	8.80523	9.22959	8.84925	10.4152	8.26836	9.9934	8.83291	9.20459	coding	NM_021075	NDUFV3	RefSeq_coding	2151	chr21	+	44313377	44329772		CAATTTGGAGACAGTTCCTGTTGAGAATAACCACGGTTTCCATGAAAAGACAGCAGCGCT	4731	Hs.473937	GO:0008137|GO:0006120|GO:0022904|GO:0006810|GO:0005737|GO:0016020|GO:0005743|GO:0005747|GO:0005747|GO:0005739|GO:0005730|GO:0005634|GO:0070469	NP_066553	NADH dehydrogenase (ubiquinone) flavoprotein 3, 10kDa
ASHG19A3A015987	2737.12	2703.9	2973.25	4516.61	3391.42	2492.15	2604.58	3243.17	3641.66	2838.37	3762.39	2732.54	11.3016	11.4419	11.6451	12.3161	11.8435	11.0911	11.5353	12.0885	11.4432	11.357	11.7067	11.2274	coding	NM_016044	FAHD2A	RefSeq_coding	1313	chr2	+	96068447	96078878	NM_199336,	TCTTCTCGGTAGAAGGGAGAAGGACAGAGCTCTCTTCAATAAATTCGTCAGGTCAAAGCA	51011	Hs.546387	GO:0016787|GO:0046872	NP_057128	Fumarylacetoacetate hydrolase domain containing 2A
ASHG19A3A006584	170.939	113.022	114.884	173.714	139.58	175.146	158.494	151.464	215.248	127.181	160.797	1828.43	7.30585	6.72538	7.07821	7.91596	7.12687	7.23093	7.38923	8.06295	7.18937	6.85663	7.2357	10.6625	coding	NM_181803	UBE2C	RefSeq_coding	520	chr20	+	44441254	44445594		ACAGCAGGAGCTGATGACCCTCATGAACCCAACATTGATAGTCCCTTGAACACACATGCT	11065	Hs.93002	GO:0005524|GO:0016881|GO:0016874|GO:0000166|GO:0005515|GO:0004842|GO:0004842|GO:0051488|GO:0031145|GO:0031145|GO:0031145|GO:0007049|GO:0000075|GO:0051301|GO:0008054|GO:0010458|GO:0010994|GO:0007067|GO:0000278|GO:0007094|GO:0051436|GO:0048015|GO:0031536|GO:0051437|GO:0043687|GO:0070979|GO:0070936|GO:0016567|GO:0051439|GO:0007051|GO:0006511|GO:0005680|GO:0005829|GO:0005829|GO:0005654|GO:0005654	NP_861519	Ubiquitin-conjugating enzyme E2C
ASHG19A3A046179	1895.04	6122.79	1029.41	1915.38	1650.48	3538.75	1557.79	2543.59	1708.78	4631.69	1655.38	7740.78	10.7644	12.5664	10.1097	11.195	10.7301	11.5998	10.7399	11.773	10.2062	12.0818	10.4424	12.67	coding	NM_005013	NUCB2	RefSeq_coding	1612	chr11	+	17298285	17353069		AAAGAAGAGCTACAACGTCAGCATGATCAACTGGAGGCTCAGAAGCTGGAATATCATCAG	4925	Hs.654599	GO:0003677|GO:0005509|GO:0005793|GO:0005794|GO:0005797|GO:0005737|GO:0005829|GO:0005783|GO:0005576|GO:0005615|GO:0005640|GO:0005634|GO:0005886	NP_005004	Nucleobindin 2
ASHG19A3A006245	121.955	183.785	113.171	171.162	86.6917	150.665	93.8413	138.824	148.64	171.211	138.133	152.454	6.82247	7.48415	7.05928	7.89476	6.46252	7.00898	6.63325	7.93276	6.67161	7.28399	7.0401	6.85173	coding	NM_153746	ZDHHC14	RefSeq_coding	2774	chr6	+	157802556	158094976		GGCCACGCAGTCACAGAGTGACATGGCTGCAGCCACGCCCCTGCTGCAGAGCGAGCCCAG	79683	Hs.187459	GO:0008415|GO:0046872|GO:0016740|GO:0008270|GO:0016021|GO:0016020	NP_714968	Zinc finger, DHHC-type containing 14
ASHG19A3A009572	158.075	83.2044	98.0773	77.6003	107.708	157.355	101.564	59.9471	142.065	78.6392	131.975	102.87	7.19215	6.25523	6.85825	6.6871	6.77101	7.07278	6.74541	6.6966	6.60836	6.15484	6.98354	6.25179	coding	NM_177441	TMUB2	RefSeq_coding	2443	chr17	+	42264573	42269098		AATAGGACCATCCAAAAGCGGAACCTTCGCCTCAGAAAAAGGGTGCGGGACCCCTCCTCA	79089	Hs.181391	GO:0016021|GO:0016020	NP_803190	Transmembrane and ubiquitin-like domain containing 2
ASHG19A3A054012	11837.8	12035.3	11913.7	14737.1	23540.8	13561.1	22189.2	13965.4	16223.2	9675.38	14964	31971.3	13.487	13.4058	13.7736	13.9918	14.8818	13.5496	14.8041	13.8695	13.8344	13.1238	13.8605	14.6113	coding	NM_021149	COTL1	RefSeq_coding	1850	chr16	-	84599205	84651669		TCTGTACTGTATTGGGATTGTAAAGAACATCTCTGCACTCAGACAGTTTACAGAAATAAA	23406	Hs.289092	GO:0003779|GO:0019899|GO:0005515|GO:0008150|GO:0050832|GO:0005575|GO:0005737|GO:0005856|GO:0005622	NP_066972	Coactosin-like 1 (Dictyostelium)
ASHG19A3A046940	1667.4	820.67	1232.25	891.948	1198.69	1535.41	1012.87	706.284	1537.11	1098.25	1532.84	1227.91	10.5691	9.76006	10.355	10.1711	10.244	10.3886	10.0831	10.1767	10.0372	10.0209	10.3242	10.0745	coding	NM_022761	C11orf1	RefSeq_coding	984	chr11	+	111749947	111754795		TTTTTTCACCTCGTCTGAAATGGCTGCCTCCCAGTGTCTCTGCTGCTCAAAATTTCTCTT	64776	Hs.17546	GO:0003674|GO:0008150|GO:0005634	NP_073598	Chromosome 11 open reading frame 1
ASHG19A3A001499	138.326	124.491	76.5444	50.0226	151.518	198.801	90.7083	50.0627	125.218	204.311	125.571	135.597	7.00167	6.87234	6.51495	5.99583	7.24328	7.41083	6.58208	6.42492	6.44668	7.54563	6.91869	6.67868	coding	NM_001077352	RBM23	RefSeq_coding	2522	chr14	-	23369854	23388396		TACAGGAGTCCTCCACTTGCCACTGGGGAGCCAGTTGATAATCTGAGTCCTGAGGAGCGT	55147	Hs.4997	GO:0003723|GO:0000166|GO:0006397|GO:0005634	NP_060577	RNA binding motif protein 23
ASHG19A3A030774	386.013	752.948	334.12	788.622	199.016	502.801	221.191	365.921	242.656	750.486	410.567	681.764	8.46083	9.63839	8.53028	10.0212	7.63065	8.78289	7.86578	9.29035	7.34785	9.46484	8.48528	9.15357	coding	NM_019032	ADAMTSL4	RefSeq_coding	4209	chr1	+	150521897	150533410		CCTCCTGAAATGGTTCCCACCCAGAACTAATTTATTTTTTATTAAAGATGGTCATGACAA	54507	Hs.516243	GO:0004222|GO:0008233|GO:0002020|GO:0005515|GO:0030198|GO:0043065|GO:0005575|GO:0031012|GO:0005576|GO:0005614	NP_079284	ADAMTS-like 4
ASHG19A3A006105	110.198	152.692	83.0267	100.765	83.7156	111.458	75.3732	75.5071	133.928	223.001	122.294	126.791	6.67494	7.195	6.63044	7.09379	6.41638	6.5709	6.31712	7.03614	6.53386	7.67932	6.88258	6.57364	coding	NM_148966	TNFRSF25	RefSeq_coding	1527	chr1	-	6521220	6526255		GCCGCTGTCTGTGGCTGGAGGCAGAATGAAGCTGGGATGGAGGCTCTGACCCCACCACCG	8718	Hs.462529	GO:0004872|GO:0005031|GO:0006915|GO:0007166|GO:0006917|GO:0008624|GO:0042981|GO:0007165|GO:0033209|GO:0005829|GO:0005576|GO:0005887|GO:0005886	NP_683871	Tumor necrosis factor receptor superfamily, member 25
ASHG19A3A029621	459.609	535.099	457.489	514.496	499.577	664.521	387.485	403.383	684.542	611.569	590.883	851.242	8.70387	9.11567	8.96996	9.45481	8.97255	9.19409	8.68798	9.42075	8.82203	9.15651	8.97767	9.49683	coding	NM_006398	UBD	RefSeq_coding	1006	chr6	-	29523389	29527702		TATATAAGCTGCATGCAAAGTCCTTTTTCTGTCTCTGGTTTCTGGCCCCTTGTCTGCAGA	10537	Hs.728313	GO:0070628|GO:0005515|GO:0070842|GO:0043011|GO:0035417|GO:0043123|GO:0043065|GO:0032446|GO:0016567|GO:0006508|GO:0034341|GO:0034612|GO:0006511|GO:0016235|GO:0005737|GO:0005634	NP_006389	Ubiquitin D
ASHG19A3A050418	5750.35	1549.7	6130.01	2268.61	4163.31	2919.38	3303.17	1647.84	7177.17	2174.84	7377.36	2355.01	12.4073	10.6506	12.7108	11.4103	12.1507	11.3189	11.9015	11.2379	12.5167	10.9907	12.6856	11.0018	coding	NM_001144072	UBAC2	RefSeq_coding	2696	chr13	+	99852678	100038751		TCTGACCGCCATCGTTTCAACCTGGAGAGGTGAGCCCTCCCCTACCGACGCACTTCCCTT	337867	Hs.508545	GO:0016021|GO:0016020	NP_808882	UBA domain containing 2
ASHG19A3A004034	269.623	171.47	314.566	148.98	297.543	168.364	237.316	159.498	485.857	272.548	406.259	303.523	7.94391	7.37879	8.44923	7.68473	8.21283	7.17268	7.96713	8.13735	8.32361	7.97181	8.47299	7.90825	coding	NM_206819	MYBPC1	RefSeq_coding	3879	chr12	+	101988746	102079657	NM_002465,	TCCCCGCCTAGCGCCTTGCCTCCAGGTTTGGGTAGTCGGGCCCTGGAGAGAAAAGATTCA	4604	Hs.654589	GO:0003779|GO:0008307|GO:0031432|GO:0007155|GO:0030049|GO:0005829|GO:0030016|GO:0032982	NP_996557	Myosin binding protein C, slow type
ASHG19A3A004945	72.0118	41.6685	91.4743	36.0487	89.8239	71.6665	71.2758	60.1459	116.239	52.9122	97.0122	558.794	6.05801	5.20313	6.76432	5.48237	6.51508	5.91984	6.24028	6.70249	6.34397	5.57079	6.57723	8.84792	coding	NM_001018054	LRP8	RefSeq_coding	4351	chr1	-	53711217	53793726	NM_017522,	CTGCTCAGATTGGCCATGTCTATCCTGCACGAGTGGCATTAAGCCTTGAAGATGATGGAC	7804	Hs.726256	GO:0034187|GO:0005509|GO:0005515|GO:0004888|GO:0030229|GO:0007596|GO:0019221|GO:0006897|GO:0021766|GO:0021819|GO:0006629|GO:0030168|GO:0045860|GO:0006508|GO:0007165|GO:0005901|GO:0005576|GO:0005615|GO:0016021|GO:0005886	NP_150643	Low density lipoprotein receptor-related protein 8, apolipoprotein e receptor
ASHG19A3A040008	208.76	127.136	195.752	124.509	191.461	216.035	116.632	85.3125	202.448	133.565	191.782	184.185	7.58735	6.90314	7.79852	7.4142	7.57297	7.53358	6.9482	7.21979	7.09676	6.92446	7.4663	7.14679	coding	NM_002547	OPHN1	RefSeq_coding	7531	chrX	-	67262187	67653299		ATTTCAAAGCGCTTGCTGCGAGAAAGGACGGTTTTCTATACTTCTTCCCTGGATGAAAGC	4983	Hs.128824	GO:0005096|GO:0005100|GO:0017124|GO:0003779|GO:0008093|GO:0035255|GO:0030036|GO:0007411|GO:0006897|GO:0046847|GO:0007399|GO:0051056|GO:0007165|GO:0007264|GO:0006930|GO:0015629|GO:0030424|GO:0030054|GO:0042995|GO:0005829|GO:0043197|GO:0005622|GO:0045202	NP_002538	Oligophrenin 1
CUST_14_PI418767722	12373.8	27291.1	14333.3	33234.6	14778.4	31193	13778.1	29801.2	14819.8	26301.2	16835.4	28943.6	13.5457	14.3674	14.1034	15.0419	14.117	14.6684	14.0658	14.7617	13.7002	14.4232	14.0756	14.5018	coding	NM_004309	ARHGDIA	RefSeq_coding	1912	chr17	-	79825597	79829238		TCAGGCAGAGGCGCCTGTCCCTGCTTCTTTTCTGACCGGGAAATAAATGCCCCTGAAGGA	396	Hs.159161	GO:0005096|GO:0005094|GO:0042802|GO:0005515|GO:0007266|GO:0006916|GO:0006928|GO:0050771|GO:0007162|GO:0048011|GO:0050772|GO:0050770|GO:0032880|GO:0051056|GO:0007264|GO:0005737|GO:0005856|GO:0005829|GO:0005829|GO:0001772	NP_004300	Rho GDP dissociation inhibitor (GDI) alpha
ASHG19A3A002591	1511.71	2089.91	1199.29	1270.9	1203.54	1340.61	1522.58	431.075	2010.41	1683.25	1704.98	2661.55	10.4332	11.0901	10.3172	10.6723	10.2492	10.1985	10.705	9.50363	10.4742	10.6286	10.4863	11.1902	coding	NM_001142625	RAB34	RefSeq_coding	1118	chr17	-	27041298	27045286		AAAGACGCCCTCCAGGTGGCCCAGGAGATGAAGACTGTTCAGAGACTGCCCAGCCCTAGG	83871	Hs.301853	GO:0005525|GO:0003924|GO:0019001|GO:0000166|GO:0006897|GO:0015031|GO:0007264|GO:0005794|GO:0005737|GO:0005769|GO:0001726	NP_114140	RAB34, member RAS oncogene family
ASHG19A3A011531	148.143	178.35	56.4492	107.501	97.4287	167.369	88.6307	42.0634	76.0103	85.2189	102.772	162.359	7.10284	7.44024	6.11237	7.19027	6.63449	7.16376	6.54874	6.16882	5.76498	6.27102	6.65508	6.94731	coding	NM_198850	PHLDB3	RefSeq_coding	2505	chr19	-	43979255	44008985		TGTCATCTACTTCCAGGCCATTGAGGAAGTCTATTATGACCACTTACGCTGTGCCTTCAA	653583	Hs.631581		NP_942147	Pleckstrin homology-like domain, family B, member 3
ASHG19A3A047996	395.153	415.322	265.871	73.8714	495.946	621.256	343.829	26.2829	372.99	327.777	314.99	570.184	8.49489	8.73351	8.21749	6.60761	8.96289	9.09187	8.50619	5.47748	7.9412	8.23498	8.13286	8.87435	coding	NM_052845	MMAB	RefSeq_coding	4154	chr12	-	109991522	110011358		CAAAGATGACCAAGTGTTTGAAGCCGTGGGAACTACAGATGAATTAAGTTCAGCTATTGG	326625	Hs.12106	GO:0005524|GO:0008817|GO:0000166|GO:0016740|GO:0009236|GO:0005739	NP_443077	Methylmalonic aciduria (cobalamin deficiency) cblB type
ASHG19A3A022558	1073.02	481.329	236.809	831.133	58.1372	580.362	185.876	372.274	261.894	389.384	108.159	494.457	9.94295	8.95082	8.0592	10.0899	5.89784	8.98598	7.61395	9.31676	7.45263	8.48	6.722	8.65749	coding	NM_001123041	CCR2	RefSeq_coding	2689	chr3	+	46395234	46402412		GGGACAGAGCAGAACTTTCACCTTCATATATTTGTATGATCCTAATGAATGCATAAAATG	729230	Hs.511794	GO:0016493|GO:0031727|GO:0004930|GO:0004950|GO:0042803|GO:0004872|GO:0007259|GO:0035705|GO:0043615|GO:0001974|GO:0006874|GO:0006968|GO:0019725|GO:0070098|GO:0006935|GO:0019221|GO:0007204|GO:0006955|GO:0006954|GO:0044419|GO:0035696|GO:0007194|GO:0016525|GO:0043310|GO:0002829|GO:0050870|GO:0010820|GO:2000409|GO:0002827|GO:0046641|GO:0030335|GO:0090265|GO:0050729|GO:0032729|GO:0032743|GO:0090026|GO:…	NP_001116868	Chemokine (C-C motif) receptor 2
ASHG19A3A002676	272.381	278.661	242.597	158.847	262.036	154.447	187.544	182.808	654.971	191.554	340.918	312.194	7.96067	8.12981	8.09065	7.78076	8.02843	7.04543	7.62497	8.32962	8.75783	7.44827	8.24226	7.95312	coding	NM_001144058	NTM	RefSeq_coding	3408	chr11	+	131780711	132206715		TGAAAACTACAGCCCTGACCCCTTGGAAAGGTCCAGGCGCCGTCAGCGAGGTGAGCAACG	50863	Hs.504352	GO:0007155|GO:0008038|GO:0031225|GO:0005886	NP_057606	Neurotrimin
ASHG19A3A015724	730.557	581.791	499.4	709.697	642.304	1084.35	411.957	402.026	428.169	831.337	314.608	1159.38	9.37719	9.2438	9.0864	9.87315	9.3326	9.90384	8.77825	9.41668	8.14397	9.62385	8.13096	9.98827	coding	NM_018438	FBXO6	RefSeq_coding	1565	chr1	+	11724149	11734407		CCAGCTTGTGGTAACTTACTGTCACATAGCTCTGACGTTTTGTTGTAATAAATGTTTTCA	26270	Hs.464419	GO:0030246|GO:0001948|GO:0005515|GO:0004842|GO:0000077|GO:0006281|GO:0030433|GO:0031146|GO:0006516|GO:0030163|GO:0006508|GO:0006986|GO:0019005|GO:0005737	NP_060908	F-box protein 6
ASHG19A3A055007	98.8783	60.1927	69.1121	59.0298	95.3666	49.7555	64.2031	51.6727	233.375	51.9108	89.0827	103.177	6.5155	5.75589	6.37956	6.25718	6.60341	5.38645	6.08549	6.47401	7.2945	5.54344	6.46767	6.25641	coding	NM_002548	OR1D2	RefSeq_coding	939	chr17	-	2995352	2996290		GTGCTGATTATCAGAGCCATCCTCAGAATACCCTCAGTCTCTAAGAAATACAAAGCCTTC	4991	Hs.532771	GO:0004930|GO:0004984|GO:0004872|GO:0007186|GO:0007186|GO:0006928|GO:0006935|GO:0000060|GO:0050896|GO:0007608|GO:0007338|GO:0005887|GO:0005886	NP_002539	Olfactory receptor, family 1, subfamily D, member 2
ASHG19A3A008688	436.192	313.221	424.334	579.673	480.475	355.938	401.802	353.874	1461.73	405.206	631.59	468.44	8.63312	8.30321	8.86349	9.60891	8.91379	8.26676	8.74131	9.24342	9.95186	8.54011	9.06643	8.57878	coding	NM_030576	LIMD2	RefSeq_coding	3232	chr17	-	61773249	61777519		CCAGGTCACCCTGAAGCCCCACAACTTTTTATCTGGATTAGTTATTAAAAAACAATAAAT	80774	Hs.591166	GO:0046872|GO:0008270	NP_085053	LIM domain containing 2
ASHG19A3A050873	53.5037	62.8996	63.4877	34.7932	69.1684	64.3518	59.6847	34.4564	90.2926	72.3218	58.6782	93.1691	5.62673	5.82367	6.26025	5.424	6.14143	5.75955	5.97983	5.8765	6.00922	6.03807	5.91824	6.09451	coding	NM_001040276	ESR2	RefSeq_coding	2745	chr14	-	64693752	64805268		GTGCTTGCTCTGCTGGAGGAACCGCGCTCAGGTTACAGTCATCCCAATATGGTTCTGAAG	2100	Hs.660607	GO:0003677|GO:0019899|GO:0030284|GO:0004879|GO:0046872|GO:0005515|GO:0048019|GO:0043565|GO:0003700|GO:0005496|GO:0003707|GO:0003713|GO:0008270|GO:0007267|GO:0030520|GO:0010467|GO:0030308|GO:0009968|GO:0034339|GO:0006355|GO:0007165|GO:0043401|GO:0006351|GO:0005739|GO:0005654|GO:0005634	NP_001428	Estrogen receptor 2 (ER beta)
ASHG19A3A053304	54.4924	139.037	64.6458	32.4526	84.4616	89.922	86.4513	35.6953	150.723	79.9797	133.452	120.611	5.65291	7.04609	6.28556	5.31044	6.42573	6.26129	6.51206	5.93012	6.69223	6.17845	6.99836	6.49791	coding	NM_000693	ALDH1A3	RefSeq_coding	3510	chr15	+	101420008	101456828		AACTGCTACAACGCCCTCTATGCACAGGCTCCATTTGGTGGCTTTAAAATGTCAGGAAAT	220	Hs.459538	GO:0070403|GO:0004029|GO:0004030|GO:0016491|GO:0042803|GO:0070324|GO:0031076|GO:0048048|GO:0060324|GO:0001822|GO:0021768|GO:0060166|GO:0002072|GO:0055114|GO:0021983|GO:0043065|GO:0042493|GO:0042574|GO:0002138|GO:0042573|GO:0005737	NP_000684	Aldehyde dehydrogenase 1 family, member A3
ASHG19A3A013073	718.673	1703.9	785.407	2301.5	646.672	1704.35	677.449	936.998	838.701	1499.53	874.835	1176.96	9.35436	10.7903	9.71458	11.4351	9.34243	10.549	9.49015	10.5322	9.11941	10.4681	9.52071	10.0104	coding	NM_153219	ZNF524	RefSeq_coding	1135	chr19	+	56111729	56114504		CCCCCAGACTAACAGACCCTTGGAGGCAGGGGCTGTGGAAATAAATCTCTGCCTGCTGGC	147807	Hs.440291	GO:0003677|GO:0046872|GO:0008270|GO:0005622|GO:0005634	NP_694951	Zinc finger protein 524
ASHG19A3A001240	1781.19	3434.91	1759.17	2752.29	1735.34	3672.81	2021.5	2972.07	2484.84	3450.91	2301.34	4223.65	10.6664	11.7621	10.8702	11.669	10.8169	11.6547	11.1523	11.983	10.8227	11.6519	10.9478	11.8201	coding	NM_001035247	UFD1L	RefSeq_coding	1730	chr22	-	19437463	19466738		ATTCCCAATTATGAATTTAAACTTGGATGAAGCTGGAGGCAGATTCGTCGCTTTCTCTGG	7353	Hs.474213	GO:0005515|GO:0004843|GO:0001501|GO:0006511|GO:0005737|GO:0005829|GO:0005634	NP_005650	Ubiquitin fusion degradation 1 like (yeast)
ASHG19A3A047821	628.944	397.096	665.634	361.211	954.122	760.938	843.466	465.117	1952.47	722.722	1356.69	895.677	9.16429	8.67386	9.4807	8.9751	9.90016	9.39261	9.80968	9.60613	10.4286	9.40686	10.1398	9.57399	coding	NM_139137	KCNC2	RefSeq_coding	2468	chr12	-	75436877	75603511		GGCAATGCTCTGAGGCTCTCTCCAGTAACATCACCCTACAACTCTCCTTGTCCTCTGAGG	3747	Hs.27214	GO:0005244|GO:0005249|GO:0006112|GO:0006811|GO:0006813|GO:0050796|GO:0055085|GO:0016021|GO:0016020|GO:0008076	NP_715624	Potassium voltage-gated channel, Shaw-related subfamily, member 2
ASHG19A3A000904	181.627	309.15	99.6693	70.9821	115.376	266.922	138.186	51.889	202.427	318.252	118.815	155.859	7.3931	8.28205	6.88106	6.54469	6.87185	7.84989	7.19281	6.48054	7.09644	8.19017	6.84428	6.88394	coding	NM_001009183	SIP1	RefSeq_coding	1309	chr14	+	39583487	39606175		AAGGTGCTCTGAAGTGAGGCTCTTAGTGGTATTTTGACCAACGTGATTTAGCTGATGAGC	8487	Hs.652307	GO:0005515|GO:0016070|GO:0008380|GO:0000375|GO:0006397|GO:0034660|GO:0000387|GO:0000245|GO:0015030|GO:0005737|GO:0005829|GO:0005829|GO:0005622|GO:0005654|GO:0005634|GO:0005681	NP_003607	Survival of motor neuron protein interacting protein 1
ASHG19A3A046888	301.661	179.383	367.165	193.049	262.244	220.355	275.329	186.108	621.424	216.875	414.065	281.077	8.11309	7.44844	8.6578	8.06904	8.02914	7.55896	8.18282	8.35559	8.67922	7.63877	8.49879	7.79398	coding	NM_014361	CNTN5	RefSeq_coding	4164	chr11	+	98891870	100227472		CTCAGAATTATTATTCCCCCATCAATCTTTATCATTCCTCAGATGCCTTCAAACAAGATG	53942	Hs.656783	GO:0005515|GO:0007155|GO:0031225|GO:0005886	NP_780775	Contactin 5
ASHG19A3A011819	70.5401	52.3533	44.1647	51.2448	45.7391	85.7285	51.7116	34.6527	90.3174	69.4992	73.2658	103.697	6.02602	5.54244	5.78473	6.0338	5.58389	6.19068	5.78027	5.88545	6.00958	5.97723	6.20956	6.26345	coding	NM_206818	OSCAR	RefSeq_coding	1946	chr19	-	54597934	54604148		TTTGAGACTGTAGAGTCAGGTCCCTAAGTCCACCCCAGGGGCTGGAAACCTGGAGTTCAG	126014	Hs.347655	GO:0004872|GO:0005576|GO:0016021|GO:0005886	NP_996554	Osteoclast associated, immunoglobulin-like receptor
ASHG19A3A031755	243.539	174.899	178.958	125.271	203.072	186.056	150.265	111.465	217.265	165.518	246.98	170.47	7.79471	7.41022	7.67305	7.4248	7.65946	7.31613	7.30804	7.6152	7.20156	7.234	7.81187	7.02437	coding	NM_031469	SH3BGRL2	RefSeq_coding	4675	chr6	+	80340999	80413369		TCACAATGTCAGAAGAACAGAGGCAATGGATGTACAAAAACGTCCCCCCGGAAAAGAAAC	83699	Hs.706531	GO:0017124|GO:0005634	NP_113657	SH3 domain binding glutamic acid-rich protein like 2
ASHG19A3A008232	3715.56	3849.11	2599.47	3935.71	3185.31	3992.88	2607.53	2684.3	3474.57	4346.12	2735.74	2489.54	11.7652	11.9185	11.4533	12.122	11.7438	11.7657	11.5366	11.8457	11.3702	11.9931	11.2022	11.0875	coding	NM_007247	SYNRG	RefSeq_coding	8181	chr17	-	35874900	35969486	NM_001163547,NM_001163546,NM_001163544,AK091801,	CGCCTGTATTTTAAAAGATGGTGTGGTTTCTCCCTTGTTTGTATTTTAATAAACAACTGC	11276	Hs.594647	GO:0005509|GO:0006897|GO:0006886|GO:0030121|GO:0005794|GO:0005737|GO:0016020	NP_942583	Synergin, gamma
ASHG19A3A016066	119.245	142.591	118.312	120.077	134.215	135.315	125.467	118.46	254.026	150.436	184.184	203.401	6.78702	7.08144	7.12269	7.35492	7.07932	6.84949	7.05461	7.69923	7.40821	7.09828	7.41655	7.30138	coding	NM_004633	IL1R2	RefSeq_coding	1484	chr2	+	102608305	102644880		TAAATCCCTGCTTTACTGCTGAGCTCCTGCTGGAGGTGAAAGTCTGGCCTGGCAGCCTTC	7850	Hs.25333	GO:0004908|GO:0004910|GO:0004872|GO:0006955|GO:0016021|GO:0005886|GO:0005886	NP_775465	Interleukin 1 receptor, type II
ASHG19A3A005576	1108.17	441.084	754.792	491.844	827.983	966.627	694.194	411.018	1400.51	654.202	1096.97	761.308	9.98152	8.82109	9.65703	9.3982	9.70087	9.73936	9.52555	9.4461	9.87896	9.24859	9.83874	9.31734	coding	NM_033013	NR1I2	RefSeq_coding	4335	chr3	+	119499330	119537331		ACACTACCTTCTCCCATTTCAAGAATTTCCGGGTCTCTCTGCAGCTGCGGGGGGAGGATG	8856	Hs.7303	GO:0008144|GO:0004879|GO:0046872|GO:0005515|GO:0043565|GO:0003700|GO:0003707|GO:0003713|GO:0016564|GO:0008270|GO:0046618|GO:0042738|GO:0010467|GO:0034339|GO:0006355|GO:0007165|GO:0008202|GO:0006805|GO:0042908|GO:0005654|GO:0005634	NP_148934	Nuclear receptor subfamily 1, group I, member 2
ASHG19A3A006015	954.161	661.71	1101.92	682.57	863.401	815.607	898.349	764.39	2106.32	879.27	1467.25	1003.95	9.76417	9.44539	10.2016	9.81937	9.76859	9.4987	9.91055	10.2823	10.5549	9.71195	10.26	9.7606	coding	NM_003693	SCARF1	RefSeq_coding	3457	chr17	-	1537151	1549041	NM_145350,	GTGACCCTGGCTGGCTGGGGCCCAGGTGTGAAGACCCCTGCCCCACTGGTACCTTTGGGG	8578	Hs.647430	GO:0030169|GO:0005044|GO:0004888|GO:0007155|GO:0006707|GO:0016322|GO:0048680|GO:0010976|GO:0006898|GO:0016021|GO:0016020	NP_663327	Scavenger receptor class F, member 1
ASHG19A3A041713	673.359	425.825	598.887	430.883	507.57	505.7	442.271	386.071	1013.41	484.86	722.167	640.448	9.26273	8.77008	9.32869	9.21426	8.99002	8.78989	8.87557	9.36413	9.39081	8.808	9.26138	9.05449	coding	NM_001178115	ZNF185	RefSeq_coding	3248	chrX	+	152110214	152142024		CGCCAGAGGTCGCCCGAGGATCACGAATGGGCCCGAGGAGCTGGCTGCCCCTTCCCCCGC	7739	Hs.16622	GO:0046872|GO:0008270|GO:0030054|GO:0005737|GO:0005856|GO:0005925	NP_009081	Zinc finger protein 185 (LIM domain)
ASHG19A3A010911	4985.77	1600.77	3378.85	2687.39	2773.49	3405.13	2330.93	1659.38	5162.22	2148.73	3841.7	3120.26	12.2283	10.6998	11.837	11.6383	11.5235	11.5396	11.3647	11.2468	11.9907	10.9762	11.7409	11.4055	coding	NM_018664	BATF3	RefSeq_coding	992	chr1	-	212859759	212873327		ATTGTCTCTCCCTTCTCCAGTTCTGGGAATTTACAGGCACAATACACTTCCTTTTCCTGG	55509	Hs.62919	GO:0046983|GO:0043565|GO:0003700|GO:0003714|GO:0006355|GO:0006366|GO:0005634	NP_061134	Basic leucine zipper transcription factor, ATF-like 3
ASHG19A3A036877	225.817	203.881	133.09	60.7033	213.563	148.764	187.662	28.0662	280.892	100.109	136.865	71.9392	7.69463	7.65864	7.2868	6.30037	7.73482	6.98829	7.62565	5.57609	7.54781	6.51389	7.02937	5.69391	coding	NM_022783	DEPDC6	RefSeq_coding	2631	chr8	+	120885899	121063156		TGTCCAACAAGCACCCATTTGTGGACAGCAATCTTCTCTACCAGTTCAGAATGAACTTCC	64798	Hs.112981	GO:0005515|GO:0035556|GO:0032007|GO:0045792|GO:0006469|GO:0042981|GO:0005622	NP_073620	DEP domain containing MTOR-interacting protein
ASHG19A3A011450	1195.44	550.71	1525.09	1142.84	1022.36	365.058	513.266	370.164	529.12	886.556	1292.82	2609.88	10.0915	9.15651	10.6508	10.5236	9.99996	8.30363	9.09026	9.30803	8.45648	9.72471	10.0589	11.1631	coding	NM_003890	FCGBP	RefSeq_coding	16407	chr19	-	40353963	40440533		TTTTCTGGGTCACAGAGGCCAAATGTGAGAGCATTGAATAAATATCTTAAGCTAAGCTGC	8857	Hs.111732	GO:0005515|GO:0005576	NP_003881	Fc fragment of IgG binding protein
ASHG19A3A044430	12597.3	13917.4	11583	9832.29	17605.1	10123.3	12896.6	10182.5	14250.5	11430.5	14204.6	11590.7	13.582	13.5864	13.7219	13.392	14.3697	13.1306	13.9533	13.4639	13.6393	13.3699	13.7631	13.2353	coding	NM_030912	TRIM8	RefSeq_coding	2753	chr10	+	104404251	104418076		TATCTGTCTAGAGCACACACCAAAATCCAACCTTCTAATAAACATGATGGCGCAGTCCCA	81603	Hs.336810	GO:0016874|GO:0046872|GO:0042803|GO:0008270|GO:0008150|GO:0016605|GO:0005737|GO:0043231|GO:0005730|GO:0005634	NP_112174	Tripartite motif-containing 8
ASHG19A3A050466	118.272	77.033	71.2356	51.0956	129.135	88.4584	100.066	59.0006	74.5072	97.8287	95.0771	121.107	6.77468	6.13305	6.41831	6.02914	7.02717	6.23509	6.72612	6.67073	5.7378	6.47693	6.55271	6.50583	coding	NM_001135589	GDAP2	RefSeq_coding	2553	chr1	-	118419845	118472302		CAAGCTGATTGTTTAACTGTTGCTGATTGCTTATCTTTATATTGTATGAACCAGGGGATA	54834	Hs.594430	GO:0032526	NP_060156	Ganglioside induced differentiation associated protein 2
ASHG19A3A029928	519.904	330.294	462.992	453.326	484.77	708.302	388.114	313.77	596.773	429.335	559.466	707.897	8.89277	8.3874	8.98763	9.28592	8.92883	9.28927	8.68956	9.07752	8.62615	8.62786	8.90353	9.211	coding	NM_199184	C6orf108	RefSeq_coding	813	chr6	-	43193368	43197211		GGGTAAGGGAGCTGTGAGGGTGTGGATGGGAGGCAGCTTCACCTTTCCCTGCCCTTTCCA	10591	Hs.109752	GO:0070694|GO:0016798|GO:0050144|GO:0008283|GO:0009159|GO:0008152|GO:0009117|GO:0030307|GO:0005737|GO:0005730|GO:0005634|GO:0005634	NP_954653	Chromosome 6 open reading frame 108
ASHG19A3A006837	754.631	537.306	807.603	538.775	877.137	675.712	678.841	445.588	1405.08	580.637	1230.18	856.134	9.42683	9.12008	9.75206	9.51694	9.78794	9.21934	9.49216	9.54669	9.88336	9.06869	9.9888	9.50469	coding	NM_199004	ARRB2	RefSeq_coding	1891	chr17	+	4613788	4624794		ATCACCTGGACAAAGTGGACCCTGTAGTGTTTGTGACCCTCACCTGCGCCTTCCGCTATG	409	Hs.435811	GO:0001664|GO:0031701|GO:0005515|GO:0005102|GO:0031625|GO:0002031|GO:0002031|GO:0007596|GO:0060326|GO:0002032|GO:0032088|GO:0045953|GO:0031397|GO:0009968|GO:0030168|GO:0070374|GO:0070374|GO:0043161|GO:0015031|GO:0016567|GO:0031623|GO:0006366|GO:0007179|GO:0005905|GO:0005737|GO:0016023|GO:0031410|GO:0005829|GO:0005634|GO:0005886	NP_945355	Arrestin, beta 2
ASHG19A3A016200	168.088	134.496	185.698	152.743	147.341	115.709	137.303	68.4653	278.872	99.404	151.408	84.3388	7.28143	6.99065	7.72038	7.7206	7.20129	6.62448	7.18289	6.88992	7.53779	6.50359	7.16078	5.93804	coding	NM_198581	ZC3H6	RefSeq_coding	11557	chr2	+	113033177	113097640		TTACTCAGAGATACCAAGAAGATGAAGAACAAACCAGCACCCAACCTCATAGGGCACCAA	376940	Hs.190477	GO:0046872|GO:0003674|GO:0003676|GO:0008270|GO:0008150|GO:0005575	NP_940983	Zinc finger CCCH-type containing 6
ASHG19A3A031781	685.304	630.455	687.348	604.771	764.62	764.911	649.967	432.939	1136.37	699.695	843.244	900.726	9.29122	9.3651	9.52423	9.66281	9.57988	9.4012	9.42795	9.50796	9.56633	9.35575	9.47359	9.58281	coding	NM_014847	UBAP2L	RefSeq_coding	4006	chr1	+	154193324	154243328		TCCTTTGAGAAACAAGGTTTTCATTCCGGTACTCCTGCTGCTTCCTTCAACTTGCCTTCA	9898	Hs.490551	GO:0005515|GO:0007339|GO:0005671	NP_055662	Ubiquitin associated protein 2-like
ASHG19A3A053950	330.469	1008.03	343.801	673.307	775.154	861.845	525.308	157.346	1078.22	1393.2	718.593	949.007	8.2487	10.0678	8.57277	9.80096	9.60475	9.57652	9.11893	8.11865	9.48363	10.3711	9.25404	9.66935	coding	NM_006324	CFDP1	RefSeq_coding	1281	chr16	-	75327608	75467387		TTTGGGGAAAATTGGTGCCAAGAAGCAGAAAATGAGCACCCTTGAGAAGTCCAAACTGGA	10428	Hs.461361	GO:0003674|GO:0006916|GO:0008150|GO:0007155|GO:0007275|GO:0042127|GO:0008360|GO:0005575	NP_006315	Craniofacial development protein 1
ASHG19A3A010052	779.677	2458.73	779.326	1226.22	733.721	1442.65	682.46	1168.65	593.229	2376.27	922.917	1455.25	9.47447	11.3111	9.70207	10.6235	9.52328	10.306	9.49924	10.7998	8.61777	11.104	9.59874	10.3189	coding	NM_001080519	BAHCC1	RefSeq_coding	10342	chr17	+	79373539	79433358		TAACGTGACGAAGGCACGATTCCTGTAAATGTGTAAACTAAGGGGATGGTTGGATTTTTT	57597	Hs.514580	GO:0003677	NP_001073988	BAH domain and coiled-coil containing 1
ASHG19A3A039306	3552.26	3101.33	3326.47	3552.14	2818.05	2488.38	2263.06	2688.37	1939.07	4144.53	3103.68	1786.67	11.6973	11.6191	11.8087	12.0013	11.5479	11.0866	11.3177	11.8519	10.417	11.9298	11.4032	10.6299	coding	NM_032809	FAM73B	RefSeq_coding	3597	chr9	+	131799252	131834350		TTCGACTTTTGGATGGTAGAGTGTGTGCACTGACTGTGAGTCGAATAAACAATTGAGACG	84895	Hs.632693	GO:0016021|GO:0016020	NP_116198	Family with sequence similarity 73, member B
CUST_50_PI426249100	493.454	347.329	547.117	337.658	503.424	462.305	452.109	271.585	1044.83	483.331	762.26	619.909	8.81331	8.46526	9.21036	8.87771	8.98073	8.6505	8.90814	8.88222	9.43492	8.80343	9.34005	8.99794	coding	NM_021192_Exon1+	NM_021192	HOX cluster	781	chr2	+	176972083	176972864	NM_021192,	GTCTGACTTCGCTAGCAAGCCTTCGTTCCTTTCCCAACCGTCGTCCTGCCAGATGACTTT
ASHG19A3A001536	54.7591	81.1074	47.178	51.9537	45.1689	66.6343	35.3084	50.3262	56.2756	85.7383	63.6956	96.0379	5.66188	6.21501	5.87309	6.061	5.56634	5.81248	5.21891	6.43384	5.34645	6.27968	6.02675	6.14089	coding	NM_001078175	SLC29A1	RefSeq_coding	2253	chr6	+	44191295	44201888		TTCTGCTGGCCAGTCTGGGCACCTGGCCCCTGAGGGAGGGAGCTGTCAGCCAGGGAAAAC	2030	Hs.25450	GO:0005337|GO:0005515|GO:0071333|GO:0071456|GO:0007595|GO:0055086|GO:0006139|GO:0015858|GO:0015858|GO:0060079|GO:0030431|GO:0055085|GO:0015862|GO:0016324|GO:0016323|GO:0005887|GO:0005624|GO:0005886	NP_004946	Solute carrier family 29 (nucleoside transporters), member 1
ASHG19A3A023645	358.37	330.062	376.687	318.167	375.382	404.527	251.361	279.368	611.68	445.273	565.692	556.549	8.35991	8.38592	8.69857	8.7975	8.5461	8.45329	8.05004	8.92041	8.66049	8.68063	8.91791	8.84102	coding	NM_004953	EIF4G1	RefSeq_coding	4888	chr3	+	184038262	184053145		GGCAGGGTGGAGAGGTGGGCTCTTCCTGCTTCCCACTCATCTTATAGCTTTCTTTCCCCA	1981	Hs.433750	GO:0005515|GO:0008135|GO:0003743|GO:0016070|GO:0044267|GO:0010467|GO:0008286|GO:0044419|GO:0016071|GO:0000288|GO:0000289|GO:0006446|GO:0006446|GO:0006412|GO:0006413|GO:0005737|GO:0005829|GO:0005829|GO:0016281	NP_937887	Eukaryotic translation initiation factor 4 gamma, 1
ASHG19A3A001683	1239.78	1052.88	764.141	1184.6	1052.82	1534.51	638.168	323.724	661.968	1626.62	1346.77	1487.86	10.1482	10.1326	9.6758	10.5725	10.0444	10.3878	9.39957	9.1211	8.77449	10.5788	10.1296	10.3516	coding	NM_001098533	CDK10	RefSeq_coding	1759	chr16	+	89753075	89762771		TGCGCCTGCTGCACTTCCTGTTCATGGCGACGGCCGGGGACTGCCTGGAGAGCTCCTATT	8558	Hs.699177	GO:0005524|GO:0004693|GO:0000166|GO:0005515|GO:0016740|GO:0008285|GO:0006468|GO:0007089	NP_443714	Cyclin-dependent kinase 10
ASHG19A3A050897	412.973	895.235	312.347	1446.79	268.42	924.445	349.012	1129.9	556.828	958.556	535.373	802.69	8.55574	9.89592	8.43973	10.8349	8.05938	9.67224	8.52753	10.7644	8.52753	9.83668	8.84339	9.4004	coding	NM_182526	TMEM229B	RefSeq_coding	4068	chr14	-	67936983	67982021		CCTCTGTCTCTTCCTTTTCACATTTGTGCACATAAAATATACTGGTGTTTGTGTTCCAGG	161145	Hs.509707	GO:0016021|GO:0016020	NP_872332	Transmembrane protein 229B
ASHG19A3A051024	229.248	250.125	1627.07	428.452	1284.06	569.571	1125.77	727.228	496.496	366.772	2074.34	772.814	7.71446	7.96662	10.7472	9.20753	10.3482	8.95686	10.2482	10.2173	8.35922	8.39019	10.7843	9.33766	coding	NM_015859	GTF2A1	RefSeq_coding	1736	chr14	-	81646393	81687294		TTATCTTGTTTTCTTGGGGTTGCCCCCTCTTGTTTGTGTTGTGTGTGGAAATGGCGAACT	2957	Hs.592334	GO:0003677|GO:0003702|GO:0017025|GO:0016251|GO:0016251|GO:0005515|GO:0046982|GO:0003713|GO:0008134|GO:0010467|GO:0032568|GO:0006368|GO:0006366|GO:0006367|GO:0006367|GO:0016032|GO:0005737|GO:0005730|GO:0005654|GO:0005654|GO:0005634|GO:0005672	NP_963889	General transcription factor IIA, 1, 19/37kDa
ASHG19A3A001902	263.624	135.141	152.266	116.689	121.827	138.026	112.19	148.137	275.5	189.465	217.492	416.418	7.91293	6.99902	7.4646	7.31458	6.94464	6.87975	6.89204	8.03323	7.52166	7.43438	7.63652	8.39762	coding	NM_001114136	EPB49	RefSeq_coding	2561	chr8	+	21912327	21940035		TGCCCCACGCCCTGGGCCCTTGAAGGGCTCTGCGAGTGACCCGGCGGGCGAGCTCCGTGC	2039	Hs.106124	GO:0003779|GO:0051017|GO:0051693|GO:0007010|GO:0015629|GO:0005737|GO:0005634	NP_001969	Erythrocyte membrane protein band 4.9 (dematin)
ASHG19A3A015784	21298.2	28744.2	17613.4	23734.9	24301	40410.3	20039.4	15726.5	18104.7	35277.4	21758.6	21523.5	14.5129	14.4245	14.4438	14.633	14.9349	15.004	14.6401	14.0219	14.0363	14.8642	14.5599	14.0623	coding	NM_006196	PCBP1	RefSeq_coding	1772	chr2	+	70314584	70316332		CTGTTCAGCTGTTAATGCTGGGATCCATATTTAGTTTTATAAGCTTTTCCCTGTTTTTAG	5093	Hs.2853	GO:0003677|GO:0003723|GO:0005515|GO:0003697|GO:0008380|GO:0010467|GO:0016071|GO:0000398|GO:0005737|GO:0005654|GO:0005634|GO:0030529	NP_006187	Poly(rC) binding protein 1
CUST_7_PI418767722	155522	225981	124980	249736	162031	194220	149254	218594	123542	196161	150220	240857	17.3814	17.6306	17.2033	17.9517	17.345	17.345	17.4068	17.9055	17.0105	17.4417	17.3717	18.0254	coding	NM_001101	ACTB	RefSeq_coding	1852	chr7	-	5566782	5570232		AGGGCTTACCTGTACACTGACTTGAGACCAGTTGAATAAAAGTGCACACCTTAAAAATGA	60	Hs.520640	GO:0005524|GO:0019894|GO:0050998|GO:0000166|GO:0005515|GO:0019901|GO:0005200|GO:0051084|GO:0034332|GO:0007411|GO:0007596|GO:0034329|GO:0045216|GO:0006928|GO:0044267|GO:0006457|GO:0070688|GO:0035267|GO:0030424|GO:0005737|GO:0005856|GO:0005829|GO:0005829|GO:0043234|GO:0030529	NP_001092	Actin, beta
ASHG19A3A046464	12904.3	11258.1	9428.6	747.52	8883.14	419.708	10542.7	1108.11	12212.1	1674.88	7556.48	1113.06	13.6336	13.315	13.4103	9.9389	13.3347	8.50348	13.6742	10.7415	13.3772	10.621	12.7265	9.92272	coding	NM_002353	TACSTD2	RefSeq_coding	2080	chr1	-	59041096	59043166		CTTCAGCTTGCCCTTACTGCCACTGATATTGGTAATGTTCTTTTTTGTAAAATGTTTGTA	4070	Hs.23582	GO:0004872|GO:0008283|GO:0007166|GO:0050896|GO:0007601|GO:0005829|GO:0005887|GO:0016020	NP_002344	Tumor-associated calcium signal transducer 2
ASHG19A3A018001	934.974	733.146	996.372	757.562	932.597	782.936	931.536	802.76	2679.62	1183.7	1854.08	1545.37	9.73517	9.59852	10.0668	9.9602	9.87242	9.43427	9.96112	10.3423	10.9399	10.1291	10.6088	10.4182	coding	NM_020746	MAVS	RefSeq_coding	11760	chr20	+	3827448	3856761		AATTTTTGCAATGTGGATGTTGTAGAGATTCTGCCTTACCTGCCCTGCCTCACAGCAAGA	57506	Hs.570362	GO:0050700|GO:0005515|GO:0019901|GO:0004871|GO:0002218|GO:0071360|GO:0042742|GO:0045087|GO:0044419|GO:0032480|GO:0043123|GO:0071660|GO:0071651|GO:0002230|GO:0002230|GO:0010552|GO:0032727|GO:0032727|GO:0032728|GO:0032728|GO:0032757|GO:0033160|GO:0001934|GO:0051091|GO:0042993|GO:0032760|GO:0060340|GO:0009615|GO:0007165|GO:0016021|GO:0016020|GO:0005741|GO:0005741|GO:0005741|GO:0005739	NP_065797	Mitochondrial antiviral signaling protein
ASHG19A3A034963	210.063	150.877	171.804	170.792	201.428	197.275	182.066	139.049	519.452	246.273	300.256	328.768	7.59581	7.17652	7.62069	7.89183	7.64812	7.39886	7.59088	7.93582	8.43242	7.82352	8.06775	8.03006	coding	NM_015172	BAT2L2	RefSeq_coding	10394	chr1	+	171454665	171562649		TTAAGCTGTATGCCTTCCCTTATTGCCCAGCAGCAACAGAATCCGCAAGTTTATGTGTCT	23215	Hs.494614	GO:0008022	NP_055987	Proline-rich coiled-coil 2C
ASHG19A3A000790	950.87	479.074	1090.74	398.295	1219.29	767.368	1037.51	307.247	1866.86	588.69	1777.05	1359.14	9.75863	8.94399	10.1863	9.10737	10.2692	9.4059	10.1181	9.05059	10.3574	9.09302	10.5436	10.2202	coding	NM_001005354	PRR13	RefSeq_coding	1113	chr12	+	53835432	53840426		CTAAACATGTGGAATCCCAATGCCGGTGGGCCCCCTCATCCTGTGCCACAGCCAGGGTAT	54458	Hs.728833	GO:0005634	NP_060927	Proline rich 13
ASHG19A3A020486	2236.53	4865.68	2468.02	3933.44	2565.55	7023.7	2553.77	4067.65	4268.9	5621.61	2928.84	5471.98	11.0089	12.2301	11.3696	12.1212	11.4013	12.5799	11.5105	12.384	11.6947	12.3593	11.313	12.1812	coding	NM_000026	ADSL	RefSeq_coding	1565	chr22	+	40742503	40762573		TTCAGTCCCATTCACTCCCAGTTGGATCATTTACTGGATCCTTCTTCTTTCACTGGTCGT	158	Hs.75527	GO:0070626|GO:0004018|GO:0004018|GO:0004018|GO:0004018|GO:0016829|GO:0006167|GO:0055086|GO:0051262|GO:0006144|GO:0006164|GO:0009168|GO:0005737|GO:0005829|GO:0005829|GO:0005739	NP_001116850	Adenylosuccinate lyase
ASHG19A3A024466	746.74	1080.82	452.584	83.2141	1226.28	1407.98	922.885	50.5592	794.033	976.065	705.581	1105.57	9.40919	10.1716	8.95573	6.79753	10.2788	10.2701	9.94887	6.4398	9.04528	9.86433	9.22777	9.91276	coding	NM_016245	HSD17B11	RefSeq_coding	1892	chr4	-	88257690	88312455		AAGGCATTTCTTCCTGCAATGACGAAGAATAACCATGGCCATATTGTCACTGTGGCTTCG	51170	Hs.594923	GO:0005488|GO:0004303|GO:0016229|GO:0006710|GO:0055114|GO:0006694|GO:0005737|GO:0005576	NP_057329	Hydroxysteroid (17-beta) dehydrogenase 11
ASHG19A3A045236	1488.19	7277.14	645.222	1993.31	808.91	7292.87	1907.1	5965.01	1883.64	9237.71	1719.52	2932.46	10.4109	12.8138	9.4385	11.2465	9.66009	12.6463	11.0556	12.8605	10.3733	13.0565	10.4965	11.3227	coding	NM_022349	MS4A6A	RefSeq_coding	1432	chr11	-	59939972	59950674		TATGCTCTGCATTTGCCCCTGGTGATCTTAAAATTCGTTTGCCTTTTTAAAGCTATATTA	64231	Hs.523702	GO:0004872|GO:0016021|GO:0016020	NP_690591	Membrane-spanning 4-domains, subfamily A, member 6A
ASHG19A3A033678	26459.1	5458.56	16950.7	11159.2	13604.2	15979.9	11269.4	4160.41	30347.2	9752.22	30618.5	15210.4	14.8543	12.3922	14.3827	13.5791	13.9747	13.7603	13.7736	12.4146	14.9204	13.1391	15.1647	13.5963	coding	NM_014690	FAM131B	RefSeq_coding	4285	chr7	-	143050493	143059173		TCTCTCCCTCTCCGTTGCCTTTTACTGTCGTTCCTGCCTCCTCCGATTCGCTTTGTTCAC	9715	Hs.648908		NP_055505	Family with sequence similarity 131, member B
CUST_17_PI426249100	3637.46	1792.15	5337.64	2110.35	4868.94	2099.81	5022.77	4010.66	10806.3	3165.96	8127.19	3769.7	11.7338	10.8666	12.5134	11.3169	12.4013	10.8484	12.5653	12.3699	13.1704	11.5193	12.8448	11.6643	coding	NM_014620_Exon2+	NM_014620	HOX cluster	117	chr12	+	54446943	54447060	NM_014620,	AGAAATGACGTCAGAATCATTTGCATCCCGCTGCCTCTACCTGCCTGGTCCAGCTGGGAC
ASHG19A3A048105	671.662	711.17	446.086	285.448	729.818	919.508	592.819	198.976	952.146	739.621	747.685	935.084	9.25985	9.55398	8.93572	8.63528	9.51475	9.66617	9.29248	8.44768	9.30419	9.44233	9.31469	9.64149	coding	NM_139015	SPPL3	RefSeq_coding	3432	chr12	-	121201035	121342151		ATGCCTGGTCTCCTACTATGCTTTGTCCTTCGCTATGACAACTACAAAAAGCAAGCCAGT	121665	Hs.507087	GO:0004190|GO:0008233|GO:0043523|GO:0016021|GO:0016020	NP_620584	Signal peptide peptidase 3
ASHG19A3A051096	545.753	365.075	532.376	255.158	490.239	416.445	478.758	284.098	1001.76	405.82	771.898	569.097	8.95892	8.54326	9.17055	8.48117	8.94363	8.49429	8.99103	8.94121	9.37559	8.54326	9.35754	8.87072	coding	NM_000295	SERPINA1	RefSeq_coding	3220	chr14	-	94843084	94855153		GTGGACTTAGCCCCTGTTTGCTCCTCCGATAACTGGGGTGACCTTGGTTAATATTCACCA	5265	Hs.525557	GO:0002020|GO:0005515|GO:0004867|GO:0004867|GO:0006953|GO:0007596|GO:0006954|GO:0010951|GO:0030168|GO:0002576|GO:0030162|GO:0046687|GO:0034097|GO:0032355|GO:0001666|GO:0010288|GO:0032496|GO:0033986|GO:0014070|GO:0034014|GO:0005576|GO:0005576|GO:0005615|GO:0031093|GO:0005578	NP_001121179	Serpin peptidase inhibitor, clade A (alpha-1 antiproteinase, antitrypsin), member 1
ASHG19A3A034598	125.634	209.886	90.9757	244.878	141.157	349.484	98.049	125.455	167.271	228.513	140.834	347.358	6.86322	7.70137	6.7577	8.41807	7.14114	8.23498	6.69514	7.78042	6.83221	7.71446	7.06317	8.11659	coding	NM_199344	SFT2D2	RefSeq_coding	880	chr1	+	168195254	168212087		GTGAAACAGCTGAAGCGAATGTTTGAGCCTACTCGTTTGATTGCAACTATCATGGTGCTG	375035	Hs.645435	GO:0015031|GO:0016192|GO:0016021|GO:0016020	NP_955376	SFT2 domain containing 2
ASHG19A3A022622	358.29	150.424	123.239	119.165	308.75	231.956	175.55	93.1796	162.476	123.302	218.737	158.564	8.35941	7.17303	7.17398	7.34353	8.26983	7.63705	7.5397	7.35101	6.79321	6.81349	7.64254	6.90973	coding	NM_001640	APEH	RefSeq_coding	2775	chr3	+	49711434	49720933		TGTGTTTTATGAAGACTGGGGAGAAAACATGGTTTCCAAAAGCATCCCTGTGCTCTGCGT	327	Hs.517969	GO:0016787|GO:0004252|GO:0006508|GO:0005737|GO:0031965	NP_001631	N-acylaminoacyl-peptide hydrolase
ASHG19A3A054633	135.464	99.4719	89.3241	105.784	104.894	149.168	96.7524	76.8741	161.939	102.463	120.172	158.965	6.97188	6.53486	6.72876	7.16521	6.73717	6.9932	6.6753	7.06245	6.78866	6.54773	6.86068	6.91333	coding	NM_177398	LMX1A	RefSeq_coding	3555	chr1	-	165171104	165325952		TTCCAGCAGCGCTCCGCAACTTCTCTCTGCTCCAGTCACTGGGAGAGAGCTCGCCTACCA	4009	Hs.667312	GO:0046872|GO:0043565|GO:0003700|GO:0030528|GO:0008270|GO:0007411|GO:0021953|GO:0021549|GO:0021542|GO:0007275|GO:0045665|GO:0001558|GO:0006355|GO:0005634	NP_796372	LIM homeobox transcription factor 1, alpha
ASHG19A3A033565	98.3547	42.6278	59.0598	39.7983	60.8239	104.472	64.3391	31.3321	77.6424	50.9672	50.8051	65.0916	6.50855	5.23684	6.16816	5.63898	5.95906	6.48154	6.08912	5.73852	5.79577	5.51583	5.72443	5.53693	coding	NM_020911	PLXNA4	RefSeq_coding	13061	chr7	-	131808091	132261323		AATGAGTTCAACACCATGAGTGCACTCTCAGAGATCTTCTCCTATGTGGGCAAATACAGC	91584	Hs.511454	GO:0004872|GO:0017154|GO:0007411|GO:0007275|GO:0007399|GO:0007165|GO:0016021|GO:0005622|GO:0005886|GO:0005886	NP_861440	Plexin A4
ASHG19A3A006574	153.105	154.41	240.556	111.616	345.398	179.823	209.185	65.487	655.202	230.034	278.507	226.156	7.1505	7.21224	8.07928	7.2456	8.42995	7.26739	7.7844	6.82529	8.75831	7.7214	7.9657	7.46295	coding	NM_181702	GEM	RefSeq_coding	2080	chr8	-	95261486	95274547		GCCCCGACGCCGATCCGGCCGAGCCAAGACTCAACGATGACTCTGAATAATGTCACCATG	2669	Hs.654463	GO:0019003|GO:0005525|GO:0003924|GO:0005516|GO:0000287|GO:0000166|GO:0005515|GO:0006184|GO:0007166|GO:0006955|GO:0007165|GO:0007264|GO:0009898|GO:0005886	NP_859053	GTP binding protein overexpressed in skeletal muscle
ASHG19A3A018608	1457.75	991.405	672.714	456.162	908.764	965.679	1164.87	535.341	1571.1	972.674	905.555	684.063	10.3827	10.0444	9.4955	9.29248	9.83668	9.73822	10.2976	9.81075	10.0766	9.85772	9.57246	9.15931	coding	NM_001033515	LOC100132288	RefSeq_coding	1640	chr21	-	9907193	9968585		TGGTAGGATCCTTTCATGGCGTCTTCCCAGGACCTCCTGCCAGCTCCCATTGGGAGTTTT	100132288	Hs.487562	GO:0000226|GO:0005874	NP_001028687	Hypothetical protein LOC100132288
ASHG19A3A001931	4955.19	5890.91	4475.27	2291.54	6792.98	7267.52	4760.63	2457.11	7661.24	4027.8	5410.33	18344.7	12.2122	12.5134	12.2577	11.4277	12.9159	12.6428	12.4802	11.7318	12.6099	11.8869	12.2356	13.828	coding	NM_001118890	GLRX	RefSeq_coding	1093	chr5	-	95149553	95158577	ENST00000309178,	GATTGGAGCTCTGCAGTAACCACAGATCTCATAGGAAATGTTCAACAATTCTGTGAAAGG	2745	Hs.28988	GO:0009055|GO:0015038|GO:0047485|GO:0015035|GO:0045454|GO:0022900|GO:0015949|GO:0055086|GO:0006810|GO:0005737|GO:0005829|GO:0005829	NP_002055	Glutaredoxin (thioltransferase)
ASHG19A3A049953	7609.75	3073.16	9442.7	4052.2	7084.1	5026.26	6119.58	3916.84	10574.1	4052.33	11972.6	5323.26	12.813	11.6101	13.4126	12.1574	12.9799	12.1095	12.8471	12.3459	13.126	11.8939	13.4639	12.136	coding	NM_001135816	PCOTH	RefSeq_coding	701	chr13	+	24463591	24466241		AGCGTCGCTCCCCCTCGCCTTCTCGGCCGCCCTCCCGGTTTACCGCCCCCTGTGTCCAGA	542767	Hs.642624	GO:0005737	NP_001129288	Prostate collagen triple helix
ASHG19A3A019627	120.501	65.7572	82.0278	79.136	92.5954	120.513	68.7203	51.6161	126.574	92.1692	94.2781	136.042	6.80168	5.89041	6.61387	6.71784	6.55891	6.68348	6.18844	6.47222	6.46098	6.38545	6.54108	6.68316	coding	NM_001008566	TPST2	RefSeq_coding	2018	chr22	-	26921715	26961370		TGATCCTTCAAAGGAGCCTCCCAGCTAAAAGCCAGCAGGAGAGAGACCTTGGCCACCAAG	8459	Hs.726122	GO:0008476|GO:0016740|GO:0006478|GO:0005794|GO:0000139|GO:0005783|GO:0016021|GO:0016020|GO:0005624	NP_003586	Tyrosylprotein sulfotransferase 2
ASHG19A3A010032	137.401	146.21	135.403	162.868	129.229	158.484	133.268	121.246	204.633	168.956	158.115	330.709	6.99249	7.12174	7.30937	7.82036	7.02809	7.08326	7.13967	7.73224	7.11301	7.26368	7.21347	8.03682	coding	NM_024110	CARD14	RefSeq_coding	3917	chr17	+	78152280	78182851		TGGTCCGCATCGTCAGTATGGACAAAGCCAAGGCCAGCCCTCTGCGTTTGTCCTTTGACA	79092	Hs.696253	GO:0050700|GO:0007250|GO:0001934|GO:0042981|GO:0016235|GO:0005737|GO:0005622|GO:0005886	NP_438170	Caspase recruitment domain family, member 14
ASHG19A3A051041	50.6109	76.4452	41.7636	107.22	43.7921	78.2325	43.6627	41.7783	60.9029	86.2779	47.8363	103.894	5.55087	6.12061	5.70914	7.18584	5.52071	6.05549	5.53178	6.15907	5.4568	6.28855	5.64556	6.26667	coding	NM_007039	PTPN21	RefSeq_coding	6215	chr14	-	88932122	89021123		TCCATTCTTGAAGAAAGAAGAAGATGCCACTGCCATTTGGGTTGAAACTGAAACGCACCC	11099	Hs.437040	GO:0005488|GO:0016787|GO:0004725|GO:0006470|GO:0005737|GO:0005856	NP_008970	Protein tyrosine phosphatase, non-receptor type 21
ASHG19A3A029876	1069.05	557.614	992.957	596.671	963.986	792.911	816.967	619.105	1348.65	704.511	1220.31	838.287	9.93808	9.17749	10.0615	9.64407	9.91243	9.45308	9.76223	9.99553	9.8203	9.36937	9.97578	9.46793	coding	NM_020737	LRFN2	RefSeq_coding	3144	chr6	-	40359372	40555126		TTTCCCCCCTTCTTCTTGCTAAATGCCATGGATATAACTGAATAAGCGGCTCAGGGCTTT	57497	Hs.250015	GO:0030054|GO:0016021|GO:0005886|GO:0045211|GO:0045202	NP_065788	Leucine rich repeat and fibronectin type III domain containing 2
ASHG19A3A012754	8953.3	2552.08	7163.41	3896.61	4000.12	5392.62	3336.14	1816.83	5236.69	3033.61	7323.66	3427.38	13.0856	11.3622	12.9598	12.1089	12.1023	12.2034	11.9185	11.3607	12.0155	11.4563	12.6714	11.5296	coding	NM_174945	ZNF575	RefSeq_coding	1717	chr19	+	44037339	44040282		AAACCATGGACGTGGAGCTGTGGTTTGACAGCGCTGGCTCTGCTTCTCCCCACACACTTA	284346	Hs.213534	GO:0003677|GO:0046872|GO:0008270|GO:0005622|GO:0005634	NP_777605	Zinc finger protein 575
ASHG19A3A049410	612.534	1177.63	385.157	426.55	465.008	1010.51	498.452	190.092	732.073	1559.1	447.698	448.007	9.13439	10.2869	8.72888	9.20174	8.86091	9.80562	9.05122	8.38205	8.92125	10.5242	8.60625	8.51538	coding	NM_014887	N4BP2L2	RefSeq_coding	2860	chr13	-	33091030	33112932		GCAGAAGTTACTTATTCTTTTAAGAGGTCTGCCTGGTTCTGGGAAAACAACATTGTCTCG	10443	Hs.507680	GO:0005524|GO:0003674|GO:0008150|GO:0001906|GO:0005575	NP_149102	NEDD4 binding protein 2-like 2
ASHG19A3A005956	126.451	144.541	176.064	119.862	181.775	160.199	125.437	114.974	224.813	171.898	246.275	224.075	6.87274	7.10462	7.65167	7.35275	7.49988	7.09793	7.05396	7.658	7.24594	7.28983	7.80727	7.44664	coding	NM_139353	TAF1C	RefSeq_coding	3741	chr16	-	84211461	84220662		TGGTGACATGCACCGTCCAGGGAGAAACTCTGCTGGCCGTCCGCTCTGACTACCACTGTG	9013	Hs.153022	GO:0003677|GO:0003701|GO:0016251|GO:0006363|GO:0006362|GO:0006360|GO:0006366|GO:0006361|GO:0005654|GO:0005654|GO:0005634	NP_647610	TATA box binding protein (TBP)-associated factor, RNA polymerase I, C, 110kDa
ASHG19A3A022092	213.682	321.271	221.048	255.833	216.718	233.962	152.561	144.591	249.988	271.709	252.07	400.423	7.6189	8.34058	7.96598	8.48464	7.7564	7.65093	7.32862	7.99769	7.3863	7.96785	7.83902	8.33739	coding	NM_021032	FGF12	RefSeq_coding	3672	chr3	-	191859683	192126838		TACATCTGGATTTTCACACATTTTGTCGCCACTGCCCAGACTTTGACTAACCTTGTGAGC	2257	Hs.390250	GO:0005104|GO:0008083|GO:0008201|GO:0007254|GO:0007267|GO:0008543|GO:0007507|GO:0007399|GO:0007165|GO:0005615|GO:0005634	NP_066360	Fibroblast growth factor 12
ASHG19A3A015912	3171.54	5920.53	3540.7	9404.14	4198.7	6195.58	3374.79	3442.02	5221.56	5270.65	4925.37	5511.08	11.5186	12.5221	11.9031	13.3209	12.1605	12.4105	11.9365	12.169	12.0126	12.2488	12.1032	12.1902	coding	NM_016494	RNF181	RefSeq_coding	716	chr2	+	85822836	85824831		TTTTGGAATTTGAGGAGGAGGAGACTGCCATTGAGATGCCTTGCCATCACCTTTTCCATT	51255	Hs.356187	GO:0016874|GO:0046872|GO:0008270	NP_057578	Ring finger protein 181
ASHG19A3A016109	500.806	273.582	539.915	327.998	291.303	220.788	218.304	218.866	1387.04	497.599	972.464	432.071	8.83743	8.10234	9.18952	8.83834	8.18369	7.56239	7.84546	8.57841	9.85975	8.85592	9.6742	8.45049	coding	NM_001080830	PRAMEF12	RefSeq_coding	1786	chr1	+	12834983	12838046		CCATGTCTCTGCCTGCATTCCCCTAGACAGGAAGGAGCAGTTTGTCATCCAGTTCACCTC	390999	Hs.156406		NP_001074299	PRAME family member 12
ASHG19A3A004442	537.877	278.31	309.322	205.364	535.133	613.852	367.807	52.1884	377.426	366.966	514.508	504.177	8.93778	8.12568	8.42479	8.15918	9.0682	9.07085	8.6084	6.48806	7.95997	8.39139	8.79065	8.687	coding	NM_005834	TIMM17B	RefSeq_coding	967	chrX	-	48750730	48755426		TCAAGGGTTTCCGCAATGCCCCTGTTGGAATTCGGCACCGGTTGAGAGGTAGTGCCAATG	10245	Hs.30570	GO:0015450|GO:0008565|GO:0006886|GO:0006626|GO:0055085|GO:0016021|GO:0016020|GO:0015630|GO:0005744|GO:0005739	NP_005825	Translocase of inner mitochondrial membrane 17 homolog B (yeast)
ASHG19A3A046545	343.012	217.032	210.346	212.441	242.847	278.941	216.817	198.893	638.225	349.954	476.547	394.418	8.2981	7.75235	7.90061	8.21415	7.92006	7.90998	7.83573	8.44716	8.72134	8.32982	8.69085	8.31141	coding	NM_000932	PLCB3	RefSeq_coding	3705	chr11	+	64019121	64035027		TTCAAGCTGGCTATGAACATCCTGGCTCAGAACGCCTCCCGGAACACCTTCCTGCGCAAA	5331	Hs.523761	GO:0005509|GO:0005516|GO:0016787|GO:0004435|GO:0004629|GO:0004871|GO:0007186|GO:0035556|GO:0016042|GO:0006892|GO:0007268|GO:0005829|GO:0005829|GO:0016020|GO:0042383	NP_001171812	Phospholipase C, beta 3 (phosphatidylinositol-specific)
ASHG19A3A054269	440.445	173.187	268.926	253.649	280.043	378.877	252.503	188.838	707.419	328.336	520.779	422.102	8.64864	7.39442	8.23362	8.47196	8.12436	8.35559	8.05645	8.37438	8.87181	8.2378	8.808	8.41645	coding	NM_001142334	A2BP1	RefSeq_coding	4007	chr16	+	6823809	7763340		CATGGTTCTCATGGTCCTCCCGTTTTCAACTGAACCTGTAATTAGCTCCTCAGAGACCAG	54715	Hs.459842	GO:0003723|GO:0000166|GO:0008022|GO:0005515|GO:0008380|GO:0050658|GO:0006397|GO:0005737|GO:0005634|GO:0005802	NP_665900	RNA binding protein, fox-1 homolog (C. elegans) 1
ASHG19A3A018793	596.9	776.091	506.636	730.017	509.287	757.532	572.27	1081.27	489.373	829.875	577.533	932.346	9.09557	9.68303	9.10737	9.90523	8.9936	9.38606	9.24284	10.7109	8.33526	9.62271	8.94775	9.63516	coding	NM_018053	XKR8	RefSeq_coding	2179	chr1	+	28286503	28294604		GGTCTCTACAAGTGACAGATGTGTTGTTTTCAACAGTATTATTAGGTTATGAATAAAGCC	55113	Hs.55024	GO:0016021|GO:0016020	NP_060523	XK, Kell blood group complex subunit-related family, member 8
ASHG19A3A040207	120.985	62.9065	94.9896	63.1793	90.5895	68.7809	104.268	71.5568	335.601	98.3356	213.196	174.462	6.80641	5.82398	6.81712	6.36004	6.52615	5.86039	6.7877	6.95691	7.79628	6.48682	7.61028	7.0599	coding	NM_001990	EYA3	RefSeq_coding	2045	chr1	-	28300818	28415131		TCAGTGATCAGAAGCCTGAAACATCAAGCCTTGCTTCAAACCTTCCCATGTCAGAGGAAA	2140	Hs.185774	GO:0003682|GO:0016787|GO:0046872|GO:0005515|GO:0004725|GO:0008138|GO:0009653|GO:0016568|GO:0006302|GO:0016576|GO:0007275|GO:0045739|GO:0010212|GO:0007601|GO:0005737|GO:0005634|GO:0005667	NP_001981	Eyes absent homolog 3 (Drosophila)
ASHG19A3A021567	2037.16	3383.7	825.786	229.199	2197.71	3524.86	2250.67	62.2469	2050.78	2924.38	1263.79	3256.89	10.8696	11.7409	9.77887	8.32041	11.1778	11.5905	11.3081	6.75133	10.5043	11.4133	10.0218	11.4616	coding	NM_001127192	CNBP	RefSeq_coding	3399	chr3	-	128886658	128902810		ATTTGTTATCGCTGTGGTGAGTCTGGTCATCTTGCCAAGGATTGTGATCTTCAGGAGGAT	7555	Hs.518249	GO:0003677|GO:0046872|GO:0005515|GO:0003700|GO:0008270|GO:0006695|GO:0006355|GO:0006351|GO:0005737|GO:0005783	NP_003409	CCHC-type zinc finger, nucleic acid binding protein
ASHG19A3A037918	71.445	53.4485	93.6899	74.6291	291.177	108.51	91.4026	34.5161	142.771	52.3616	70.0554	115.589	6.04521	5.57459	6.79619	6.62184	8.18263	6.53356	6.59302	5.87905	6.61655	5.55436	6.14969	6.43516	coding	NM_001114309	ELF3	RefSeq_coding	3263	chr1	+	201979689	201986306		GTCCAGAGGATTTGCAGTTCTGAACCTGCACACTCCAGTCTAGGATCTCCGAGCAAGAGC	1999	Hs.67928	GO:0005515|GO:0043565|GO:0003700|GO:0016563|GO:0003713|GO:0016564|GO:0009653|GO:0001824|GO:0009790|GO:0008544|GO:0030855|GO:0030198|GO:0006954|GO:0060056|GO:0007275|GO:0010552|GO:0006355|GO:0006366|GO:0006351|GO:0005794|GO:0005737|GO:0005730|GO:0005634|GO:0005634	NP_004424	E74-like factor 3 (ets domain transcription factor, epithelial-specific )
ASHG19A3A003960	7298.58	6784.78	6122.32	4936.44	8596.71	10164.2	6074.03	3289.63	10499.6	6543.16	8824.62	9700.87	12.7462	12.7051	12.7062	12.4382	13.2705	13.1381	12.8302	12.1089	13.1134	12.5765	12.9799	12.985	coding	NM_001895	CSNK2A1	RefSeq_coding	2732	chr20	-	463337	524482		GCCGCCGCTGCCGCTTCCACCACAGTTTGAAGAAAACAGGTCTGAAACAAGGTCTTACCC	1457	Hs.644056	GO:0005524|GO:0000166|GO:0047485|GO:0005515|GO:0004674|GO:0016055|GO:0007411|GO:0006468|GO:0007165|GO:0016581|GO:0016580|GO:0005829|GO:0005634|GO:0005886	NP_808228	Casein kinase 2, alpha 1 polypeptide
ASHG19A3A001019	139.891	257.399	103.128	78.7207	169.024	313.557	147.355	151.733	263.093	297.797	133.167	451.028	7.01695	8.01151	6.92835	6.70971	7.39977	8.0849	7.27947	8.06615	7.45817	8.0927	6.99528	8.52482	coding	NM_001014990	MRPL22	RefSeq_coding	3072	chr5	+	154320632	154348970		GGAGCCGGGGGAAGCTGGCCTTGGGGAAATCTACCACTGTCGAAGACAAATAAAATATAG	29093	Hs.483924	GO:0003735|GO:0006412|GO:0005622|GO:0015934|GO:0005739	NP_054899	Mitochondrial ribosomal protein L22
ASHG19A3A013869	177.834	302.499	143.648	137.78	196.264	353.2	178.014	107.698	252.104	337.463	190.606	327.578	7.36485	8.25353	7.3871	7.56877	7.60707	8.25353	7.55865	7.57142	7.39809	8.27687	7.4588	8.02177	coding	NM_032673	PCGF1	RefSeq_coding	939	chr2	-	74732177	74734821		AAGATCAAAGACTTGAATGAACACATTGTTTGCTGCCTATGCGCCGGCTACTTCGTGGAT	84759	Hs.316750	GO:0046872|GO:0008022|GO:0008270|GO:0005730|GO:0005634	NP_116062	Polycomb group ring finger 1
ASHG19A3A022145	88.1553	143.95	76.3477	61.8288	129.433	99.2907	76.4407	45.966	129.524	78.3335	98.1625	104.038	6.35412	7.09676	6.51075	6.32857	7.0302	6.40689	6.33582	6.29558	6.49173	6.1477	6.59302	6.26945	coding	NM_015562	UBXN7	RefSeq_coding	4740	chr3	-	196080370	196159345		ACCCTTGCAGATCTATTCCGGCCACCCATTGATTTGATGCATAAAGGCAGCTTTGAAACA	26043	Hs.518524	GO:0005515	NP_056377	UBX domain protein 7
ASHG19A3A045213	102.852	91.6338	83.9286	91.5848	98.823	119.913	72.9415	64.0267	118.358	93.6983	86.6899	121.32	6.57253	6.40511	6.64389	6.94865	6.65429	6.676	6.2701	6.79291	6.37047	6.40837	6.42927	6.50845	coding	NM_004811	LPXN	RefSeq_coding	1926	chr11	-	58294345	58343390		TACAGGAACCAAAAAGGTTTATAGAGGCTGCCTTATGCTGTCTCATCCAGTTCCTTTGCG	9404	Hs.125474	GO:0046872|GO:0008270|GO:0007155|GO:0006461|GO:0007165|GO:0005737	NP_004802	Leupaxin
ASHG19A3A029147	773.855	489.644	747.751	553.537	626.017	625.05	620.423	466.974	1307.05	626.888	931.677	791.153	9.46291	8.9772	9.64481	9.55157	9.29248	9.10082	9.35462	9.61219	9.77087	9.1899	9.61431	9.37639	coding	NM_021025	TLX3	RefSeq_coding	1513	chr5	+	170736287	170739137		AATAATAAAAAAGTTTTGGCTTTTTTCTTTAGAAACCGGCCACCTGCTTCCCCCGCGGGG	30012	Hs.249125	GO:0043565|GO:0003700|GO:0030528|GO:0007417|GO:0007275|GO:0045665|GO:0048665|GO:0001764|GO:0002087|GO:0006355|GO:0007585|GO:0005634	NP_066305	T-cell leukemia homeobox 3
ASHG19A3A020611	39.7986	57.871	46.2558	49.536	54.9741	56.1701	49.8013	45.0692	103.826	70.9207	80.4571	111.425	5.19974	5.69558	5.84711	5.98037	5.82474	5.55957	5.72835	6.26638	6.19444	6.00765	6.32817	6.37583	coding	NM_001164106	MOV10L1	RefSeq_coding	1351	chr22	+	50585483	50600115		GGGCTCTTTGGGGGCAGAGCGGGCACTGCATGGACCCTGCACCCTGGAGCTGATGTTCAG	54456	Hs.62880	GO:0005524|GO:0004004|GO:0003723|GO:0004386|GO:0016787|GO:0000287|GO:0000166|GO:0007281|GO:0007275|GO:0007283|GO:0005622	NP_061868	Mov10l1, Moloney leukemia virus 10-like 1, homolog (mouse)
ASHG19A3A051080	4143.29	4374.44	3227.12	2511.64	4185.61	7811.81	3676.7	3299.72	4470.47	8673.61	3548.61	2790.22	11.9362	12.0824	11.7694	11.5532	12.1582	12.7527	12.0663	12.1127	11.7694	12.9789	11.6171	11.2531	coding	NM_022151	MOAP1	RefSeq_coding	2435	chr14	-	93648542	93651249		CACAGATTTCTGCTATGTGTCATCAAAACATCTAGTTCTGAGTAACATTTTCACGATTGT	64112	Hs.24719	GO:0005515|GO:0042803|GO:0006919|GO:0030262|GO:0006921|GO:0005737	NP_071434	Modulator of apoptosis 1
ASHG19A3A001429	832.324	1377.99	663.849	317.608	1046.66	1324.34	838.47	324.626	1273.54	1560.41	903.929	2518.51	9.56831	10.4987	9.47736	8.79336	10.0348	10.177	9.80022	9.12544	9.72795	10.5251	9.56991	11.1075	coding	NM_016096	ZNF706	RefSeq_coding	2755	chr8	-	102209267	102217960	NM_001042511,	CCGACGCAAGACTGTCCCGGCCCGGATATGGCTCGTGGACAGCAGAAAATTCAGTCTCAG	51123	Hs.374485	GO:0046872|GO:0008270|GO:0005622	NP_057180	Zinc finger protein 706
ASHG19A3A004644	84.2015	81.2762	61.4939	75.88	108.012	83.5404	80.0338	62.4636	169.379	91.0956	156.436	120.198	6.28942	6.21768	6.21869	6.64942	6.77468	6.15591	6.40008	6.75595	6.85135	6.36687	7.20142	6.49197	coding	NM_012266	DNAJB5	RefSeq_coding	2357	chr9	+	34989724	34998428		CGGCGGCGCCCGCAGCTCCTCACCGAAACAAGGAGACCAGTGCTGGTCCAGTGGCTGTGA	25822	Hs.237506	GO:0031072|GO:0051082|GO:0000122|GO:0006457|GO:0006986|GO:0005829|GO:0005634	NP_036398	DnaJ (Hsp40) homolog, subfamily B, member 5
ASHG19A3A054819	894.786	183.439	568.463	173.918	643.251	203.765	644.885	194.153	569.499	134.858	364.282	172.668	9.6742	7.48177	9.25782	7.91789	9.33544	7.44975	9.41607	8.41447	8.56064	6.93686	8.33089	7.04443	coding	NM_001079843	CASZ1	RefSeq_coding	7938	chr1	-	10696667	10856707		CTCCTCGGCACCTGGTTATTAAGAACTGAATATTTTTCCACTTGAATTTAGTGCTATTAG	54897	Hs.439894	GO:0003677|GO:0046872|GO:0008270|GO:0005737|GO:0005622|GO:0043231|GO:0005730|GO:0005634	NP_060236	Castor zinc finger 1
ASHG19A3A010314	2278.86	843.704	1104.19	100.765	2948.64	4460.84	1573.23	79.5156	2249.15	1952.3	1602.78	403.125	11.0343	9.80288	10.2047	7.09366	11.6232	11.9173	10.7567	7.11329	10.6625	10.8415	10.3898	8.34805	coding	NM_006111	ACAA2	RefSeq_coding	1952	chr18	-	47309874	47340251		TTTGGAGCTTACGGAGGCCTTCTGAAAGACTTCACTGCTACTGACTTGTCTGAATTTGCT	10449	Hs.200136	GO:0003988|GO:0008415|GO:0005515|GO:0016740|GO:0006916|GO:0006695|GO:0006631|GO:0006629|GO:0005739|GO:0005739	NP_006102	Acetyl-CoA acyltransferase 2
ASHG19A3A052307	79.6868	64.02	59.1654	34.0585	105.594	79.9968	91.2352	25.2329	138.079	56.8672	72.773	118.752	6.20819	5.85142	6.17022	5.38947	6.74444	6.08776	6.59044	5.424	6.57046	5.67643	6.19918	6.47199	coding	NM_024666	AAGAB	RefSeq_coding	2864	chr15	-	67493368	67547074		TTTAGCCTTCTCAACTCATTGACTGGAACAAACCATAGCATTGGGTCAGCAGATCCCTGT	79719	Hs.254642	GO:0015031|GO:0005737	NP_078942	Alpha- and gamma-adaptin binding protein
ASHG19A3A004250	1601	516.999	1504.84	778.611	1013.3	1060.42	1058.67	588.062	2397.11	699.956	1767.45	1116.87	10.519	9.06336	10.6273	9.99898	9.98956	9.87124	10.1482	9.92872	10.7664	9.35688	10.533	9.92766	coding	NM_004203	PKMYT1	RefSeq_coding	2121	chr16	-	3022793	3030474	AL713779,	GCAACTGGGATGACGACAGCCTAGGGCCTTCACTCTCCCCTGAGGCTGTCCTGGCCCGGA	9088	Hs.77783	GO:0005524|GO:0016301|GO:0016301|GO:0000166|GO:0005515|GO:0004672|GO:0004674|GO:0000082|GO:0000086|GO:0007067|GO:0000278|GO:0016310|GO:0016310|GO:0006468|GO:0051726|GO:0000079|GO:0007088|GO:0005794|GO:0000139|GO:0005783|GO:0005789|GO:0016020|GO:0005624|GO:0005654|GO:0005654	NP_872629	Protein kinase, membrane associated tyrosine/threonine 1
ASHG19A3A002843	2961.69	1434.32	2965.2	1667.84	2855.13	1970.9	2464.01	1964.68	5210.92	2041.7	4254.48	2574.54	11.4207	10.549	11.6425	11.0203	11.5706	10.7606	11.4494	11.4647	12.0091	10.9053	11.8852	11.1424	coding	NM_001145546	GALP	RefSeq_coding	889	chr19	+	56687388	56697144		TCCAGCATCCGCACCTGCCCACCGGTCCTCCACCTTCCCCAAATGGGTGACCAAGACGGA	85569	Hs.283915	GO:0005179|GO:0008150|GO:0007218|GO:0009725|GO:0032868|GO:0005575|GO:0005576	NP_149097	Galanin-like peptide
ASHG19A3A054661	2115.45	1380.82	2342.01	1720.15	2164.47	1454.43	1778.38	1241.58	3624.52	1531.98	2971.66	2094.41	10.9289	10.5012	11.2969	11.0551	11.1581	10.3132	10.9453	10.8702	11.437	10.5025	11.3386	10.8339	coding	NM_020465	NDRG4	RefSeq_coding	3356	chr16	+	58497548	58547522		CGTCGGCGGCGCCGAAGCCCCGCTCCCCGCCTGCGCGTCTGTCTCGTCCGCATCTCCGCG	65009	Hs.322430	GO:0030154|GO:0016049|GO:0007275|GO:0006950|GO:0005737	NP_075061	NDRG family member 4
ASHG19A3A048629	3281.89	816.522	2199.64	1257.46	1620.33	1695.96	1313.29	737.394	3027.92	1100.06	3055.67	1294.52	11.5769	9.7541	11.192	10.6535	10.7002	10.5395	10.4702	10.2357	11.1517	10.0236	11.3736	10.1546	coding	NM_015319	TENC1	RefSeq_coding	4952	chr12	+	53442732	53458160		TGAAGACTCCCAGGCCATTAACCCCTTAGCTTTTAGGAAGATTACTCCCCCTTTTTCAAG	23371	Hs.6147	GO:0016787|GO:0046872|GO:0004721|GO:0005515|GO:0035556|GO:0008285|GO:0030054|GO:0005925|GO:0005886	NP_938072	Tensin like C1 domain containing phosphatase (tensin 2)
ASHG19A3A044128	97.9905	155.075	78.2893	82.1699	80.5368	129.15	97.2672	75.4869	135.773	98.8935	75.437	122.103	6.50281	7.21902	6.54919	6.77742	6.36299	6.78208	6.68348	7.03546	6.54773	6.49519	6.24759	6.51787	coding	NM_012330	MYST4	RefSeq_coding	8550	chr10	+	76586378	76792639		GCATAATGATCATGCCCCAGCACCAAAGGCAAGGATTTGGACGGTTTCTCATTGATTTCA	23522	Hs.35758	GO:0003677|GO:0016407|GO:0004402|GO:0046872|GO:0005515|GO:0016563|GO:0008134|GO:0016564|GO:0016740|GO:0008270|GO:0016568|GO:0043966|GO:0016573|GO:0006334|GO:0006355|GO:0070776|GO:0000786|GO:0005634|GO:0005634	NP_036462	MYST histone acetyltransferase (monocytic leukemia) 4
ASHG19A3A053212	169.373	781.178	92.1261	1412.01	58.7402	285.919	173.326	977.627	170.565	126.081	104.843	65.0852	7.29208	9.69179	6.77354	10.8043	5.91083	7.94717	7.5209	10.5848	6.86042	6.84582	6.68154	5.53684	coding	NM_013227	ACAN	RefSeq_coding	8840	chr15	+	89346673	89418585		TATGAGATCAATTCCCTGGTGCGGTACCAGTGCACAGAGGGGTTTGTCCAGCGCCACATG	176	Hs.2159	GO:0005201|GO:0005540|GO:0005515|GO:0005529|GO:0007155|GO:0006508|GO:0001501|GO:0031012|GO:0005576|GO:0005578	NP_037359	Aggrecan
ASHG19A3A037300	1704.81	1446.82	1366.47	287.945	2077.53	2249.99	1383.34	254.345	2445.9	1369.23	1877.45	2033.75	10.6047	10.5612	10.4903	8.64957	11.0964	10.9403	10.5612	8.78462	10.7983	10.3459	10.6268	10.7965	coding	NM_013442	STOML2	RefSeq_coding	1303	chr9	-	35099892	35103154		TTGAACATCCTCATCCCTGTGTTAGACCGGATCCGATATGTGCAGAGTCTCAAGGAAATT	30968	Hs.3439	GO:0005102|GO:0005737|GO:0005856|GO:0016020|GO:0005743|GO:0005739	NP_038470	Stomatin (EPB72)-like 2
ASHG19A3A008052	394.768	212.354	442.315	276.072	355.943	345.11	283.798	210.439	574.73	345.978	577.933	432.43	8.49394	7.7194	8.92246	8.59203	8.47424	8.21645	8.22677	8.52139	8.57414	8.31267	8.9487	8.45158	coding	NM_000691	ALDH3A1	RefSeq_coding	1794	chr17	-	19641299	19651746		TCAATGGACGGGAAGCAGGGTCCTTAAATACGTCCCCTCTTGGCTCTTGCCGTTCCAGGA	218	Hs.531682	GO:0004028|GO:0008106|GO:0004029|GO:0016491|GO:0007568|GO:0006081|GO:0055114|GO:0008284|GO:0051591|GO:0042493|GO:0051384|GO:0001666|GO:0007584|GO:0014070|GO:0005737|GO:0005829|GO:0005783	NP_001128640	Aldehyde dehydrogenase 3 family, member A1
ASHG19A3A052001	502.822	136.053	248.336	132.012	237.138	404.284	166.65	63.5043	293.461	195.221	335.845	187.651	8.84201	7.01069	8.12189	7.50381	7.88588	8.45265	7.46379	6.77979	7.61229	7.47682	8.22165	7.17411	coding	NM_005739	RASGRP1	RefSeq_coding	5048	chr15	-	38780302	38857007		GGAGTGTCTCCCAAACCTGATCCAAAAACCATTAGCAAACACGTCCAGAGGATGGTGGAT	10125	Hs.591127	GO:0005509|GO:0005085|GO:0008289|GO:0005515|GO:0007265|GO:0007596|GO:0030154|GO:0030168|GO:0051056|GO:0007165|GO:0005794|GO:0000139|GO:0005737|GO:0005829|GO:0005783|GO:0005789|GO:0005622|GO:0005624|GO:0005886	NP_005730	RAS guanyl releasing protein 1 (calcium and DAG-regulated)
ASHG19A3A000741	412.387	280.408	326.099	241.166	314.332	427.441	234.716	175.734	386.625	359.599	430.9	468.511	8.55222	8.1427	8.49812	8.39529	8.29444	8.53151	7.95296	8.27236	7.99153	8.36667	8.55196	8.57897	coding	NM_001003677	C11orf49	RefSeq_coding	1753	chr11	+	46958250	47183796		CAATGGATGAAGAGCTGGAACGGCTGCTTCTTCCCTTCTTCAGGCTGGCCCAGGTCCCAG	79096	Hs.368296		NP_077018	Chromosome 11 open reading frame 49
ASHG19A3A038066	1286.55	1398.87	755.725	415.318	1256.24	1353.74	708.305	518.777	831.762	1279.73	1334.49	1432.06	10.1954	10.5156	9.6577	9.16192	10.3132	10.2135	9.55741	9.76537	9.10589	10.2458	10.1122	10.299	coding	NM_000476	AK1	RefSeq_coding	2266	chr9	-	130628760	130640022		AAAGGCTTCCTGATTGATGGCTACCCGCGGGAGGTGCAGCAAGGAGAAGAGTTTGAGCGA	203	Hs.175473	GO:0005524|GO:0004017|GO:0019205|GO:0000166|GO:0005515|GO:0016740|GO:0046034|GO:0015949|GO:0055086|GO:0005737|GO:0005829	NP_000467	Adenylate kinase 1
ASHG19A3A009471	272.727	542.929	99.891	755.179	53.9025	372.84	80.9269	573.795	44.6291	268.18	57.1666	400.797	7.96328	9.13559	6.88517	9.95408	5.79863	8.33349	6.41719	9.89404	5.02618	7.94949	5.88762	8.33967	coding	NM_017596	KIF21B	RefSeq_coding	9895	chr1	-	200938519	200992828		CTGTTCCTAGATTGGATGTGTGTGTTCTAAGAAGTTGTCATAAATAAAACCTGAATGACC	23046	Hs.169182	GO:0005524|GO:0003777|GO:0000166|GO:0007018|GO:0005737|GO:0005856|GO:0005874	NP_060066	Kinesin family member 21B
ASHG19A3A035734	68.0691	140.026	69.1352	82.9629	98.0732	111.251	50.0673	103.017	79.8028	119.12	63.8167	92.1129	5.97444	7.05644	6.3801	6.79397	6.64277	6.56925	5.73603	7.50035	5.83816	6.76124	6.02914	6.07643	coding	NM_001160224	RNF170	RefSeq_coding	2020	chr8	-	42704780	42751866		ACCTCAGAGATATTCCCAGCAGTCTCAATATCCATGGTAATGCTAATAAACTACTATTCT	81790	Hs.491626	GO:0046872|GO:0008270|GO:0016021|GO:0016020	NP_112216	Ring finger protein 170
ASHG19A3A036523	4023.3	1378.71	8064.9	2116.04	6921.69	2082.01	3011.96	889.751	10717.4	2873.4	9193.76	2945.28	11.8954	10.4994	13.1715	11.3189	12.9446	10.8375	11.745	10.4685	13.1502	11.3836	13.0522	11.328	coding	NM_001160008	NRG1	RefSeq_coding	2377	chr8	+	32405727	32618507		GCTTGCCCTCCACCCTATAGTATCTATTTTATGAAATTCCAAGAAGGGATGAATAAATAA	3084	Hs.453951	GO:0043125|GO:0043125|GO:0005125|GO:0008083|GO:0008083|GO:0005515|GO:0030296|GO:0005102|GO:0030971|GO:0003712|GO:0030297|GO:0030297|GO:0007219|GO:0007171|GO:0006916|GO:0055007|GO:0007154|GO:0008283|GO:0043624|GO:0009790|GO:0030879|GO:0010667|GO:0051048|GO:0007399|GO:0014032|GO:0060045|GO:0045785|GO:0030307|GO:0061098|GO:0051155|GO:0043497|GO:0043496|GO:0007169|GO:0055012|GO:0042060|GO:0042060|GO:…	NP_039258	Neuregulin 1
ASHG19A3A015211	159.523	206.447	143.67	151.1	129.954	161.707	109.72	100.04	133.577	873.431	105.33	144.058	7.2068	7.67736	7.38726	7.707	7.03525	7.11128	6.86098	7.45677	6.52821	9.70184	6.68732	6.76664	coding	NM_015148	PASK	RefSeq_coding	4530	chr2	-	242045514	242088878		ACACAGCCTGTGAATCTTGCTGACTATACATGGGAAGAGGTGTTTCGAGTAAACAAGCCA	23178	Hs.397891	GO:0005524|GO:0042802|GO:0000166|GO:0005515|GO:0004674|GO:0004871|GO:0016740|GO:0006468|GO:0006355|GO:0005794|GO:0005737	NP_055963	PAS domain containing serine/threonine kinase
ASHG19A3A038208	736.128	1032.96	653.912	1014.49	755.471	1114.09	564.613	289.884	623.316	680.794	779.439	1157.68	9.38795	10.1003	9.45508	10.3545	9.56692	9.9389	9.22208	8.96956	8.68324	9.31819	9.37129	9.98622	coding	NM_152833	C9orf69	RefSeq_coding	2866	chr9	-	139006427	139010731		TTGTTTTTTGTTAACGTATTACTCAGAGTCACCCAAGCCTCTTGGCTGAGGGTGAAGGTG	90120	Hs.287411		NP_690046	Chromosome 9 open reading frame 69
ASHG19A3A001711	2248.99	9204.1	2599.17	6506.85	2276.71	5348.7	2348.76	8816.44	6192.44	4754.29	4681.32	5096.04	11.0156	13.0993	11.4519	12.8079	11.2286	12.1945	11.3787	13.3048	12.2912	12.1144	12.036	12.0731	coding	NM_001098822	TMEM91	RefSeq_coding	943	chr19	+	41882437	41889985	NM_001098825,	CGCTGCCTTCTGTCTAGCCCAGAAGACCCGCCCTAGTTGCCCCTACAGCCCTCACTGTGA	641649	Hs.709417	GO:0009607|GO:0016021|GO:0016020	NP_001092295	Transmembrane protein 91
ASHG19A3A013182	1300.33	1064.94	1192.87	6640.03	1032.47	5370.47	1086.32	1856.98	1700.61	10863	1074.93	2454.82	10.2107	10.1494	10.3081	12.8265	10.0139	12.1989	10.1884	11.3914	10.1985	13.2924	9.8081	11.0625	coding	NM_001077710	FAM110C	RefSeq_coding	3963	chr2	-	38815	46588		GGCAGTTTCTAAACAGAGCTTTTTCTATACACTATTTGCAACTGGAGTGCAATATTGTAT	642273	Hs.8379	GO:0005737|GO:0005856|GO:0005874|GO:0005815|GO:0000922	NP_001071178	Family with sequence similarity 110, member C
ASHG19A3A016335	24042.2	45388.4	23251.7	81656.6	21489.2	52227.1	21550.5	58128.9	19863	36715.6	21804.7	39562.8	14.7113	14.9386	14.8667	16.1929	14.722	15.4196	14.7516	15.4913	14.1892	14.9102	14.5662	14.9234	coding	NM_025029	FAM128B	RefSeq_coding	967	chr2	+	130939500	130948299	NM_001085365,	GCTACATGTTACCTCCTTCAATTGATAATAAACCTTTCTGAGATGCAGAGGGTCCAGGTC	80097	Hs.469925	GO:0005515|GO:0005813|GO:0005737|GO:0005856|GO:0008274|GO:0005819	NP_079305	Mitotic spindle organizing protein 2B
ASHG19A3A021754	413.856	214.342	283.544	220.054	334.837	409.756	383.203	216.51	686.519	302.873	639.964	503.954	8.55813	7.73406	8.31055	8.26239	8.38869	8.47034	8.67032	8.5623	8.82642	8.11931	9.08188	8.68647	coding	NM_053024	PFN2	RefSeq_coding	2117	chr3	-	149682690	149688741		TTTATTAGCAATGCAGGGTGATGGGGTATGAACCTGTGTCTCCTTTGTATCCCTCTGTTG	5217	Hs.91747	GO:0003779|GO:0005546|GO:0005515|GO:0030036|GO:0008064|GO:0015629|GO:0005737	NP_444252	Profilin 2
ASHG19A3A049514	209.727	117.679	107.689	62.9304	280.514	146.867	197.277	47.1145	347.291	124.491	232.199	167.051	7.59268	6.7897	6.98829	6.35453	8.12763	6.97104	7.7038	6.33178	7.84157	6.82745	7.72681	6.99477	coding	NM_183422	TSC22D1	RefSeq_coding	4837	chr13	-	45007660	45150701		TTCTACCCAGTTCTCCGCACAATCATTAGCTCAGGCAATTGGAAGCCAAATTGAAGATGC	8848	Hs.507916	GO:0005515|GO:0003700|GO:0006355|GO:0006366|GO:0005737|GO:0005634	NP_904358	TSC22 domain family, member 1
ASHG19A3A009906	259.134	178.951	257.053	179.855	247.11	185.833	218.67	178.546	770.741	264.946	482.736	320.781	7.88956	7.44543	8.16942	7.96534	7.94235	7.3149	7.84705	8.29691	9.00546	7.93405	8.7037	7.99153	coding	NM_018653	GPRC5C	RefSeq_coding	1836	chr17	+	72429835	72443566		GGGAACCTCCCTGAAGAGTGCCCTGGTCACAGCACCCTTGAAGACAGCCATTGGCCATGG	55890	Hs.446438	GO:0004930|GO:0005515|GO:0004872|GO:0007186|GO:0031410|GO:0030659|GO:0005887|GO:0005739|GO:0005886	NP_071319	G protein-coupled receptor, family C, group 5, member C
ASHG19A3A015094	158.15	202.944	100.325	137.335	136.939	170.924	187.649	96.1174	164.766	173.134	135.06	184.797	7.193	7.65269	6.8901	7.56472	7.10506	7.19578	7.62537	7.39834	6.81205	7.30097	7.01483	7.15066	coding	NM_016831	PER3	RefSeq_coding	6203	chr1	+	7844762	7905236		TTGATCCTGAATCGTAAGAAAGATGTCCTGGCGTCTTCTCACTTTGTTGACCTGCTTGCA	8863	Hs.162200	GO:0004871|GO:0006355|GO:0048511|GO:0005737|GO:0005634	NP_058515	Period homolog 3 (Drosophila)
ASHG19A3A034308	412.164	238.63	386.055	242.722	343.673	307.308	329.391	237.118	927.217	368.514	666.335	493.589	8.55083	7.89784	8.73129	8.40416	8.42256	8.05353	8.43623	8.68917	9.26948	8.39696	9.14041	8.65486	coding	NM_181597	UPP1	RefSeq_coding	1857	chr7	+	48128354	48148329		TTGGGTTAGTCCTAGAGCCGCTTCTAGCCCGGTTTCCTCCGCCCCAGGTTAGGACCACGT	7378	Hs.488240	GO:0004850|GO:0055086|GO:0006139|GO:0009116|GO:0009166|GO:0006206|GO:0046135|GO:0043097|GO:0006220|GO:0046108|GO:0005737|GO:0005829	NP_853628	Uridine phosphorylase 1
ASHG19A3A014648	522.724	846.356	354.093	431.697	505.179	653.773	421.227	103.073	690.038	396.751	365.545	375.512	8.90117	9.8089	8.61107	9.21612	8.98429	9.17409	8.80463	7.50092	8.83429	8.5058	8.33551	8.23275	coding	NM_004882	CIR1	RefSeq_coding	1809	chr2	-	175212879	175260443		TTCGCCAACTTCATGTGCAAGAAAGACTTTCATCCTGCCTCCAAATCCAATATCAAAAAA	9541	Hs.632531	GO:0005515|GO:0003700|GO:0003714|GO:0008380|GO:0006397|GO:0045892|GO:0006351|GO:0000118|GO:0016607|GO:0005634	NP_004873	Corepressor interacting with RBPJ, 1
ASHG19A3A019381	92.3641	107.722	87.8241	76.4782	82.944	115.995	82.0621	69.8659	165.829	131.302	123.336	214.172	6.424	6.65116	6.704	6.66082	6.40436	6.62734	6.43868	6.92294	6.82033	6.90104	6.89412	7.3797	coding	NM_058175	COL6A2	RefSeq_coding	3461	chr21	+	47518032	47549719		TTGGACGGAGCTGTTTTGTGCTGAAAGGTTTTCTCGGGGTCCGTGGTGTCCCCCAAAGGT	1292	Hs.420269	GO:0005201|GO:0005515|GO:0030674|GO:0007411|GO:0016337|GO:0030198|GO:0031012|GO:0005576|GO:0005615|GO:0016020|GO:0005578	NP_478055	Collagen, type VI, alpha 2
ASHG19A3A001132	163.125	477.146	129.403	316.3	153.131	539.893	135.519	89.1108	287.968	368.435	191.896	418.213	7.24065	8.9369	7.24363	8.78722	7.256	8.88154	7.16168	7.28455	7.58712	8.39642	7.46748	8.40368	coding	NM_001025367	VEGFA	RefSeq_coding	3608	chr6	+	43737945	43754221		CAAAAACGAAAGCGCAAGAAATCCCGTCCCTGTGGGCCTTGCTCAGAGCGGAGAAAGCAT	7422	Hs.73793	GO:0043498|GO:0042056|GO:0005125|GO:0050840|GO:0001968|GO:0008083|GO:0008083|GO:0008201|GO:0008201|GO:0005161|GO:0005515|GO:0046982|GO:0042803|GO:0043183|GO:0043184|GO:0005172|GO:0001525|GO:0002575|GO:0007596|GO:0071456|GO:0050930|GO:0050930|GO:0007275|GO:0043066|GO:0007399|GO:0030168|GO:0002576|GO:0048008|GO:0050918|GO:0045766|GO:0045766|GO:0043536|GO:0051781|GO:0030335|GO:0008284|GO:0051272|GO:…	NP_003367	Vascular endothelial growth factor A
ASHG19A3A039290	284.639	62.1697	196.333	94.768	149.965	151.126	126.979	56.998	290.78	124.13	275.366	166.172	8.0278	5.8063	7.80242	7.00054	7.22748	7.01303	7.07222	6.6186	7.60095	6.82318	7.95221	6.98615	coding	NM_001122821	SET	RefSeq_coding	2863	chr9	+	131445933	131458674		TCATGTAAATATCCCTTCCAGGCAGGGCGGCTCCAGTGCAGATTTAAGCCGCTGGCACCT	6418	Hs.436687	GO:0042393|GO:0005515|GO:0004864|GO:0008601|GO:0016564|GO:0006260|GO:0016070|GO:0016071|GO:0035067|GO:0043524|GO:0006913|GO:0006334|GO:0006337|GO:0005737|GO:0005829|GO:0005783|GO:0005654|GO:0005634|GO:0048471|GO:0043234	NP_003002	SET nuclear oncogene
ASHG19A3A046553	5520.82	4937.82	4683.24	4182.35	6857.83	7049.72	6106.7	1782.59	7599.47	4918.53	5849.37	6467.39	12.3548	12.245	12.3224	12.2094	12.9313	12.5883	12.8448	11.3373	12.5923	12.1582	12.3502	12.403	coding	NM_012094	PRDX5	RefSeq_coding	959	chr11	+	64085568	64089282		AAGGGAGTCCAGGTGGTGGCCTGTCTGAGTGTTAATGATGCCTTTGTGACTGGCGAGTGG	25824	Hs.502823	GO:0043027|GO:0016491|GO:0004601|GO:0051920|GO:0045454|GO:0034614|GO:0006954|GO:0043066|GO:0055114|GO:0006979|GO:0005737|GO:0044445|GO:0005739|GO:0005777	NP_857635	Peroxiredoxin 5
ASHG19A3A009246	95.0536	129.044	82.7332	73.1591	94.4037	91.6856	91.4147	46.6287	89.0603	79.4029	66.8532	224.18	6.46252	6.926	6.62509	6.59353	6.58929	6.29078	6.5938	6.31641	5.98965	6.1679	6.08844	7.4475	coding	NM_001033555	CYTSB	RefSeq_coding	3762	chr17	+	20059401	20218065	NM_001033553,	CAGTCTTTTGGTTGCTGTTGTTAAAAATATCCCGGCTTTGCCTTTATGAAACCTTTGCCC	92521	Hs.431045	GO:0005634	NP_690868	Sperm antigen with calponin homology and coiled-coil domains 1
ASHG19A3A006874	301.56	834.441	464.356	846.128	355.475	440.722	369.295	365.713	1000.62	645.798	441.83	906.249	8.1126	9.78433	8.99066	10.1092	8.47181	8.57744	8.61602	9.28975	9.37356	9.22671	8.58719	9.59294	coding	NM_199332	HOMER2	RefSeq_coding	1840	chr15	-	83517737	83621473	NM_199330,	AATCGAGACCTCAAGTAATCATTCCCAAGAATCTGGGCGTGAAACCCCATCTTCTACTCA	9455	Hs.578443	GO:0035256|GO:0005515|GO:0007216|GO:0030054|GO:0005737|GO:0005886|GO:0014069|GO:0045211|GO:0045202	NP_955364	Homer homolog 2 (Drosophila)
ASHG19A3A050029	1812.6	2564.94	1597.95	1387.5	1929.69	3097.6	1821.43	1775.17	2883.84	3314.14	1896.48	2251.21	10.6965	11.3696	10.721	10.7848	10.9879	11.4061	10.9762	11.3311	11.0672	11.5852	10.6424	10.9436	coding	NM_005872	BCAS2	RefSeq_coding	1310	chr1	-	115110182	115124265		GAGATAGTTCTAAACACATTCTTGATCACCAAACAACTTCAGAAAGACAGTGACTGTACA	10286	Hs.22960	GO:0005515|GO:0008380|GO:0000375|GO:0006397|GO:0005730|GO:0005634|GO:0005681	NP_005863	Breast carcinoma amplified sequence 2
ASHG19A3A011735	23330.5	5707.75	16627.8	9519.15	12080.1	12611	10597.1	4425.42	22698.7	7998.12	22099.8	11351.4	14.6666	12.4524	14.343	13.3449	13.798	13.448	13.6856	12.5007	14.4245	12.8566	14.5875	13.2056	coding	NM_145888	KLK10	RefSeq_coding	2985	chr19	-	51516000	51522954		CCACAGGCAGGGCAGAGGCACGTCTGGGTCCCCTCCCTCCTTCCTATCGGCGACTCCCAG	5655	Hs.275464	GO:0008233|GO:0004252|GO:0008236|GO:0007049|GO:0006508|GO:0005576	NP_665895	Kallikrein-related peptidase 10
ASHG19A3A004680	899.912	1333.7	848.18	617.253	924.807	1528.55	989.491	1320.23	1090.52	1940.03	1025.94	1236.57	9.68347	10.4543	9.82541	9.6883	9.86033	10.382	10.0488	10.9467	9.50636	10.8314	9.74974	10.0831	coding	NM_013406	DHPS	RefSeq_coding	1210	chr19	-	12786533	12792677		GGCCTGGTCCTGGACATCGTTGAGGCCCAGGAGTTTGATGGCTCTGACTCAGGTGCCCGA	1725	Hs.79064	GO:0034038|GO:0034038|GO:0005515|GO:0016740|GO:0044267|GO:0008612|GO:0008284|GO:0043687|GO:0051289|GO:0050983|GO:0006412|GO:0005829|GO:0005829	NP_037539	Deoxyhypusine synthase
ASHG19A3A034149	153.074	117.639	139.957	115.436	165.997	163.878	144.285	94.6415	206.639	142.363	167.129	187.878	7.15019	6.78866	7.35275	7.2979	7.37354	7.1291	7.24846	7.37423	7.1271	7.01229	7.28693	7.17587	coding	NM_001005214	LRRC52	RefSeq_coding	1125	chr1	+	165513477	165533185		TGGAAGTGCAACTGCTCTTTCCTGGACTTCGCCATCTTCTTAATAGTGTTCCATATGGAC	440699	Hs.664975	GO:0016021|GO:0016020	NP_001005214	Leucine rich repeat containing 52
ASHG19A3A020085	9051.33	9183.49	7424.79	16329.9	7501.8	17167.9	6690.39	11731.8	8871.38	10787	7412	8651.68	13.0989	13.0977	13.0318	14.1311	13.0743	13.868	12.9768	13.6589	12.8458	13.2788	12.6997	12.828	coding	NM_003776	MRPL40	RefSeq_coding	787	chr22	+	19420035	19423594		CAGGGTTCAAGTCTGCTTTCCACAGAATCAGGCATGCTGTTAATAAATACTGGTTTAATC	64976	Hs.431307	GO:0003674|GO:0009653|GO:0005761|GO:0005739|GO:0005634|GO:0005840	NP_003767	Mitochondrial ribosomal protein L40
ASHG19A3A043408	145.16	147.066	114.7	143.888	135.926	178.318	131.319	174.048	240.055	211.21	184.539	264.494	7.07037	7.13295	7.07646	7.63136	7.09564	7.2551	7.11709	8.25611	7.33472	7.59713	7.41827	7.707	coding	NM_022802	CTBP2	RefSeq_coding	4752	chr10	-	126676418	126716453		AGATGGCTTACGAGACTTACGAAGCTGACCTGTCCACCTTCCAGGGTCCTGGTGGCAAGA	1488	Hs.501345	GO:0051287|GO:0048037|GO:0016491|GO:0016616|GO:0005515|GO:0016564|GO:0030154|GO:0008285|GO:0055114|GO:0019079|GO:0050872|GO:0030054|GO:0005634|GO:0045202|GO:0017053	NP_073713	C-terminal binding protein 2
ASHG19A3A035254	208.334	201.335	377.74	197.568	313.678	230.002	327.031	256.298	585.159	255.462	529.409	335.257	7.58493	7.64154	8.7037	8.10602	8.29116	7.62606	8.42452	8.79633	8.59645	7.87922	8.82673	8.05752	coding	NM_001005480	OR2A2	RefSeq_coding	957	chr7	+	143806675	143807630		GGAGAAAATGCTGTCCCTGTTTCACAGTGTCTTTAATCCAATGCTGAACCCCCTGATCTA	442361	Hs.553841	GO:0004984|GO:0004872|GO:0050896|GO:0007608|GO:0016021|GO:0005886	NP_001005480	Olfactory receptor, family 2, subfamily A, member 2
ASHG19A3A011162	1395.89	2116.57	1363.66	1918.42	1345	1297.23	1097.93	1477.47	1248.75	2308.66	1459.19	1694.53	10.309	11.1058	10.4881	11.1973	10.4236	10.1446	10.2047	11.0866	9.70127	11.0634	10.2492	10.5464	coding	NM_014299	BRD4	RefSeq_coding	4635	chr19	-	15357848	15391262		TTGTGTTGAGTTGAAGATTGTCATGGAATAAAGATCACACCGTACTTGAGGCCATCTTCA	23476	Hs.187763	GO:0005515|GO:0044419|GO:0043388|GO:0010971|GO:0090040|GO:0006468|GO:0000114|GO:0000794|GO:0005737|GO:0005730|GO:0005634	NP_490597	Bromodomain containing 4
ASHG19A3H0000526	261.466	116.72	319.234	163.309	242.918	176.26	226.208	152.723	536.13	146.382	353.327	224.478	7.90117	6.77618	8.47108	7.8248	7.92028	7.23955	7.89763	8.07657	8.47604	7.05387	8.2882	7.44905	coding	NM_006361_intron2+	NM_006361	HOX cluster	948	chr17	+	46804405	46805354		CCACCATCACATACGTCCAGTCTTCATGCATTTCCAGACTCTTGGCCACTCTTTTAGATT
ASHG19A3A000578	2435.97	1079.78	3599.5	1305.65	2852.7	1385.34	2791.42	1632.55	7130.63	1467.79	5208.4	1910.06	11.1244	10.1698	11.9365	10.6998	11.5681	10.2464	11.637	11.2223	12.5086	10.4395	12.1747	10.7181	coding	NM_175914	HNF4A	RefSeq_coding	1369	chr20	+	42984440	43058311	NM_000457,	TGGCCCCGACCCAGGGGACAGGCAGCCACCCCTGAGACCCCACAGCCCTCACCGCCAGGT	3172	Hs.116462	GO:0003677|GO:0001077|GO:0033613|GO:0005504|GO:0046872|GO:0010843|GO:0005515|GO:0042803|GO:0005102|GO:0003700|GO:0003707|GO:0008270|GO:0007596|GO:0031018|GO:0010467|GO:0042593|GO:0055088|GO:0030308|GO:0008285|GO:0006591|GO:0055091|GO:2000189|GO:0043193|GO:0010552|GO:0045944|GO:0010551|GO:0010551|GO:0060398|GO:0050796|GO:0019216|GO:0034339|GO:0006355|GO:0009749|GO:0006351|GO:0070328|GO:0006805|GO:…	NP_849181	Hepatocyte nuclear factor 4, alpha
ASHG19A3A029602	184.769	123.823	189.393	137.248	166.767	197.632	172.784	124.839	288.721	144.087	224.852	182.708	7.41639	6.86517	7.74992	7.56376	7.38194	7.40215	7.51681	7.77438	7.59019	7.02965	7.68023	7.13373	coding	NM_001010877	ZNF311	RefSeq_coding	2698	chr6	-	28962593	28973037		TTTCCATTTCCTAAACCTCCTTTAATCTCTCATCTGGAGCGAGAAGTAGACCCCTGTGTG	282890	Hs.148218	GO:0003677|GO:0046872|GO:0005515|GO:0008270|GO:0006355|GO:0005622|GO:0005634	NP_001010877	Zinc finger protein 311
ASHG19A3A045780	785.217	2004.44	384.981	370.491	480.433	1526.47	499.94	636.41	570.155	1536.8	505.17	657.577	9.48492	11.0359	8.72842	9.00828	8.91351	10.3787	9.05607	10.0353	8.5621	10.5069	8.77081	9.10044	coding	NM_015645	C1QTNF5	RefSeq_coding	3927	chr11	-	119209651	119217383		AGCCTGCAGTTTGATCTGGTGAAGAATGGCGAATCCATTGCCTCTTTCTTCCAGTTTTTC	114902	Hs.632102	GO:0005576	NP_056460	C1q and tumor necrosis factor related protein 5
ASHG19A3A038857	5841.09	1070.67	3654.92	284.019	1347.68	1847.66	1699.73	234.344	2229.93	851.381	1309.88	105.183	12.4208	10.1577	11.9628	8.62921	10.4256	10.6723	10.8688	8.67032	10.6488	9.66035	10.08	6.28633	coding	NM_001007097	NTRK2	RefSeq_coding	7111	chr9	+	87284625	87430621		GTTCAACCATTTGCTGTAATCCAGAGGCAGCCTGTGAATCATTCTCATGCCCTGTTTTTT	4915	Hs.494312	GO:0005524|GO:0043121|GO:0005030|GO:0000166|GO:0016740|GO:0004714|GO:0007190|GO:0030154|GO:0007275|GO:0048011|GO:0007399|GO:0006468|GO:0007169|GO:0005887|GO:0016020	NP_006171	Neurotrophic tyrosine kinase, receptor, type 2
ASHG19A3A026611	75.8048	52.8244	47.4301	56.5462	77.3059	54.3434	57.5334	51.785	155.271	87.4633	81.0432	159.093	6.13686	5.55678	5.87984	6.18771	6.30244	5.516	5.93025	6.47733	6.73132	6.30953	6.34046	6.91484	coding	NM_006727	CDH10	RefSeq_coding	3261	chr5	-	24487209	24644911		AATGCCCCACAGTTTGCTGTGTTCTATGACACTTTTGTATGTGAAAATGCCAGACCAGGG	1008	Hs.92489	GO:0005509|GO:0034332|GO:0034329|GO:0016337|GO:0045216|GO:0007156|GO:0016021|GO:0005886	NP_006718	Cadherin 10, type 2 (T2-cadherin)
ASHG19A3A047096	63.6969	40.2825	36.5111	44.1346	52.214	58.6116	38.0075	30.0866	86.1506	44.6322	64.3892	72.0139	5.87435	5.14564	5.53277	5.79621	5.75679	5.61971	5.32746	5.67905	5.94242	5.32218	6.04081	5.69558	coding	NM_001037558	HEPN1	RefSeq_coding	1428	chr11	+	124789145	124790573		ATAAGCCCATCCATCTCTTTTATTCATGAACAGAGACAGAAAGAGTGCTTGGCATGGCAT	220296	Hs.159863	GO:0007155|GO:0007049|GO:0007050|GO:0040008|GO:0005737|GO:0016021|GO:0016020	NP_689935	Hepatocyte cell adhesion molecule
ASHG19A3A006276	5124.41	700.564	4549.66	1686.92	17797.6	3768.42	7659.56	407.271	9855.35	923.258	15853.1	1409.83	12.2602	9.53409	12.2791	11.035	14.3827	11.6816	13.1773	9.43367	13.0059	9.78005	13.9747	10.2709	coding	NM_170726	ALDH4A1	RefSeq_coding	2386	chr1	-	19197925	19229293		ACCGTCCAGCTGTCTGTCCGTCCAGATGCCTCCTGCTTGGATTCTGAGTGGTCAGAGATC	8659	Hs.77448	GO:0003842|GO:0004029|GO:0009055|GO:0016491|GO:0034641|GO:0055114|GO:0006561|GO:0006562|GO:0006560|GO:0005759|GO:0005739	NP_733844	Aldehyde dehydrogenase 4 family, member A1
ASHG19A3A000588	144.565	246.559	102.302	79.3011	185.271	250.873	157.38	84.2785	269.142	194.715	117.661	314.58	7.06278	7.94575	6.9184	6.72123	7.52867	7.75997	7.38024	7.2002	7.49145	7.47385	6.83193	7.96439	coding	NM_000535	PMS2	RefSeq_coding	2851	chr7	-	6012870	6048737	uc003uui.2,NR_003613,ENST00000506558,ENST00000442338,ENST00000423426,	CCATGGAGCGAGCTGAGAGCTCGAGTACAGAACCTGCTAAGGCCATCAAACCTATTGATC	5395	Hs.632637	GO:0005524|GO:0016887|GO:0003677|GO:0032407|GO:0004519|GO:0016787|GO:0030983|GO:0005515|GO:0032138|GO:0003697|GO:0006200|GO:0006298|GO:0007131|GO:0042493|GO:0016446|GO:0016447|GO:0032389|GO:0005634	NP_000526	PMS2 postmeiotic segregation increased 2 (S. cerevisiae)
ASHG19A3A009244	296.821	397.742	256.685	313.572	300.269	384.06	322.207	418.52	400.331	410.248	314.481	541.712	8.09088	8.67545	8.16729	8.77481	8.22609	8.37782	8.40368	9.47071	8.04446	8.55788	8.13059	8.80005	coding	NM_152904	CYTSB	RefSeq_coding	2714	chr17	+	19990334	20140481	NM_001033554,	GATGATGTTTCCCTCTTTTTACTTTTCCTCAGAAGATTGAGCTGTCTTTTATTTGGAGAA	92521	Hs.431045	GO:0005634	NP_690868	Sperm antigen with calponin homology and coiled-coil domains 1
ASHG19A3A025512	349.056	349.138	365.208	237.071	361.235	588.362	352.149	245.881	611.614	427.871	482.428	469.193	8.32226	8.47322	8.65129	8.37107	8.49329	9.01112	8.54117	8.73896	8.66019	8.62263	8.70336	8.5814	coding	NM_145263	SPATA18	RefSeq_coding	4314	chr4	+	52917592	52963457		AAGTCGTTGTCGAAGCAGGAGTTTAAGTCCCATTTGCCCCCGTAGCCAAATTGGTTTAAA	132671	Hs.527090	GO:0005515|GO:0030154|GO:0033554|GO:0035694|GO:0035695|GO:0007275|GO:0006974|GO:0007283|GO:0044447|GO:0005737|GO:0043231|GO:0005741	NP_660306	Spermatogenesis associated 18 homolog (rat)
ASHG19A3A004387	637.797	411.008	753.097	363.902	748.741	497.125	640.169	463.752	1482.81	494.381	1070.84	899.664	9.18596	8.72182	9.65162	8.98429	9.55438	8.76452	9.40381	9.6015	9.97449	8.84378	9.80363	9.58148	coding	NM_005316	GTF2H1	RefSeq_coding	3308	chr11	+	18343815	18388590		TGTCTAGAGTTGTAGCTTCCACCTGCACCTTCTAGCCACCATGGCAACCTCATCTGAAGA	2965	Hs.577202	GO:0008094|GO:0008353|GO:0016251|GO:0005515|GO:0004672|GO:0006281|GO:0010467|GO:0006370|GO:0006289|GO:0000718|GO:0045944|GO:0050434|GO:0000079|GO:0006363|GO:0006362|GO:0006368|GO:0006368|GO:0006360|GO:0006366|GO:0006366|GO:0006361|GO:0006367|GO:0006367|GO:0006283|GO:0016032|GO:0005675|GO:0005654|GO:0005654|GO:0005634	NP_005307	General transcription factor IIH, polypeptide 1, 62kDa
ASHG19A3A003284	158.214	161.288	124.617	117.405	144.537	201.906	145.07	105.808	237.683	195.668	184.396	247.303	7.19407	7.28088	7.18759	7.32319	7.17573	7.43581	7.25698	7.54323	7.32068	7.48116	7.41768	7.59649	coding	NM_001165039	GFRA2	RefSeq_coding	2977	chr8	-	21549529	21646346		GTCTTCTGCCTCTTCTTCTTTCTAGGGACAGGGGCAGACCCGGTGGTCAGCGCCAAGAGC	2675	Hs.441202	GO:0016167|GO:0004872|GO:0007169|GO:0031225|GO:0019898|GO:0005886	NP_001486	GDNF family receptor alpha 2
ASHG19A3A017968	2039.26	1006.14	1678.87	1162.11	1419.51	1650.82	1010.1	652.387	2103.7	1343.7	2437.2	2081.23	10.8713	10.0656	10.7954	10.5479	10.5054	10.4915	10.0779	10.0681	10.5502	10.3205	11.0365	10.8284	coding	NM_001040023	SIRPA	RefSeq_coding	4109	chr20	+	1875825	1920539		TTATTTCTCGCGCGCTTGGGGTCTCTCCCAGTCTCCGTCTCTCCATTTCTCCTGGGGGGC	140885	Hs.728158	GO:0017124|GO:0007596|GO:0007155|GO:0034329|GO:0050900|GO:0016021|GO:0016020|GO:0005886|GO:0005886	NP_542970	Signal-regulatory protein alpha
ASHG19A3A030397	109.927	136.606	100.295	68.6419	179.839	129.656	92.5608	53.5781	200.013	178.158	114.342	258.81	6.67182	7.0183	6.88979	6.48955	7.48607	6.78702	6.61525	6.52631	7.08099	7.34065	6.79613	7.67121	coding	NM_016262	TUBE1	RefSeq_coding	2314	chr6	-	112391860	112408751		AGTCGGCAGAGCACTGTGATTGCTTGCAGTGTTTCTTTATAATACATTCCATGGGAGGAG	51175	Hs.34851	GO:0005525|GO:0003924|GO:0000166|GO:0005200|GO:0007098|GO:0007018|GO:0051258|GO:0005737|GO:0005856|GO:0005874|GO:0005815|GO:0000242	NP_057346	Tubulin, epsilon 1
ASHG19A3A011354	2670.79	2765.87	2483.17	3107.3	2969.98	2596.74	2436.4	1924.21	4053.99	3435.8	3642.29	3127.33	11.2669	11.4736	11.3793	11.8215	11.6339	11.1573	11.436	11.436	11.6074	11.6444	11.6584	11.4073	coding	NM_001035516	DMKN	RefSeq_coding	609	chr19	-	35988122	35992813		GCCTCTGCTCTGCTCCTGCTCCTGCTGGGCCTGGCCTGGACCCAGGGGAGCCACGGCTGG	93099	Hs.417795	GO:0005576	NP_201574	Dermokine
ASHG19A3A018431	164.865	1060	130.889	224.678	365.482	486.671	142.053	800.011	126.735	928.926	180.688	756.251	7.25676	10.1422	7.26211	8.29358	8.50922	8.73303	7.22882	10.3375	6.46328	9.78952	7.38923	9.30475	coding	NM_005985	SNAI1	RefSeq_coding	1708	chr20	+	48599526	48605418		GGGCCTGGGAGGAAGATGTTTACATTTTTAAAGGTACACTGGTATTTATATTTCAAACAT	6615	Hs.48029	GO:0019900|GO:0046872|GO:0005515|GO:0043565|GO:0016563|GO:0016564|GO:0008270|GO:0001837|GO:0031069|GO:0001707|GO:0007275|GO:0060806|GO:0000122|GO:0001649|GO:0030335|GO:0010718|GO:0010718|GO:0060707|GO:0005737|GO:0005737|GO:0005622|GO:0005634|GO:0005634	NP_005976	Snail homolog 1 (Drosophila)
ASHG19A3A006985	279.782	109.159	258.093	134.058	280.307	157.674	230.375	171.09	1021.95	242.722	525.47	314.432	8.00117	6.66986	8.17473	7.52487	8.12625	7.07606	7.92533	8.23119	9.40068	7.80169	8.81807	7.96361	coding	NM_205835	LSR	RefSeq_coding	2081	chr19	+	35739558	35758865		GCCTACGCAGAGCTCATCGTCCTTGTGTATGCCGCCGGCAAAGCAGCCACCTCAGGTGTT	51599	Hs.466507	GO:0004872|GO:0009790|GO:0001889|GO:0019216|GO:0042627|GO:0016021|GO:0034362|GO:0005886|GO:0034361	NP_991404	Lipolysis stimulated lipoprotein receptor
ASHG19A3A039256	391.541	524.918	376.812	560.594	524.429	779.311	537.511	404.001	446.969	856.883	679.499	465.232	8.48084	9.08588	8.69899	9.56633	9.03901	9.42829	9.14739	9.42316	8.20784	9.67107	9.17135	8.56655	coding	NM_014580	SLC2A8	RefSeq_coding	2145	chr9	+	130159464	130170161		CAGTTCCCTGGGTCATCAGCCATCAAATCTTGTTGAGTTTAAAAAATAAACAGCAAAAAA	29988	Hs.179522	GO:0055056|GO:0005536|GO:0005355|GO:0022891|GO:0005975|GO:0008643|GO:0006006|GO:0015758|GO:0008286|GO:0001666|GO:0055085|GO:0031410|GO:0030659|GO:0005887|GO:0043231|GO:0005886	NP_055395	Solute carrier family 2 (facilitated glucose transporter), member 8
ASHG19A3A021489	199.308	6765.76	144.556	10686.1	199.533	6139.8	376.969	6423.02	509.486	7193.81	307.943	1519.85	7.5261	12.701	7.39654	13.5068	7.63511	12.3979	8.64563	12.9544	8.39938	12.7117	8.10128	10.3878	coding	NM_001031702	SEMA5B	RefSeq_coding	4737	chr3	-	122628042	122746576		GCTACAGCAACAAAAAAGACATTGGGCTGTGGCATTATTAATTAAAGATGATATCCAGTC	54437	Hs.210870	GO:0004872|GO:0030154|GO:0007275|GO:0007399|GO:0016021|GO:0016020	NP_001026872	Sema domain, seven thrombospondin repeats (type 1 and type 1-like), transmembrane domain (TM) and short cytoplasmic domain, (semaphorin) 5B
ASHG19A3A037007	225.233	597.771	171.221	457.353	218.643	410.768	235.206	336.747	327.298	494.329	187.217	551.453	7.69059	9.28321	7.61684	9.29864	7.76915	8.47424	7.95649	9.17697	7.76288	8.84339	7.43814	8.82498	coding	NM_004600	TROVE2	RefSeq_coding	3251	chr1	+	193029003	193055114	NR_033393,NM_001173524,	TTAGGTTTGAAAGGCAATTTTTGAGTAGCATATTACCAGCTAGCCAGTCACTAGGAATTT	6738	Hs.288178	GO:0003723|GO:0005515|GO:0006383|GO:0005737|GO:0005730|GO:0005634|GO:0030529	NP_004591	TROVE domain family, member 2
ASHG19A3A044064	161.06	98.2018	91.8275	72.8841	154.13	125.894	123.615	60.5874	189.877	59.6728	102.242	80.5272	7.22004	6.51225	6.7698	6.58755	7.2667	6.74457	7.0302	6.71391	7.00843	5.74806	6.64899	5.86529	coding	NM_018649	H2AFY2	RefSeq_coding	2181	chr10	+	71812356	71872039		AACTTCAAATTCCACCTCTGAAGATGGGCCAGGGGATGGATTCACCATTCTGTCTTCTAA	55506	Hs.499953	GO:0003677|GO:0016568|GO:0007549|GO:0006334|GO:0001740|GO:0005694|GO:0000786|GO:0005634	NP_061119	H2A histone family, member Y2
ASHG19A3A002417	266.159	284.595	135.868	121.694	129.698	270.385	123.798	139.973	179.357	246.448	151.192	773.287	7.92509	8.16783	7.31418	7.37766	7.03251	7.86806	7.0327	7.94379	6.93178	7.82466	7.15792	9.33885	coding	NM_020895	GRAMD1A	RefSeq_coding	2672	chr19	+	35491245	35517373	NM_001136199,	TACAGCAACATCTTCCGCTGGGAGACCACGATCTCCATCCAGCTGAAGGAAGTGACATGT	57655	Hs.515351	GO:0016021|GO:0016020	NP_065946	GRAM domain containing 1A
ASHG19A3A018008	96.8215	147.518	101.266	114.506	125.153	174.827	120.303	136.145	219.262	236.63	154.556	310.068	6.48594	7.1402	6.90314	7.28399	6.9852	7.22851	6.99196	7.90387	7.2136	7.76544	7.18627	7.94479	coding	NM_175842	SMOX	RefSeq_coding	2134	chr20	+	4129449	4168369		TCACCTTTTCTCTTCCAAGTGCCCAGAACAGCCCCTGGATGCTAACAGGGGCGCCGTAAA	54498	Hs.433337	GO:0016491|GO:0046592|GO:0034641|GO:0055114|GO:0006596|GO:0006595|GO:0046208|GO:0006805|GO:0005737|GO:0005829|GO:0005634	NP_787036	Spermine oxidase
ASHG19A3A035320	1795.82	9304.97	932.129	2514.23	658.105	5092.86	1234.58	1957.16	1630.21	6146.45	832.313	1306.88	10.6786	13.1102	9.96806	11.5562	9.36976	12.1372	10.3793	11.4616	10.1306	12.4952	9.46015	10.1665	coding	NM_130759	GIMAP1	RefSeq_coding	1248	chr7	+	150413697	150418251		GCATCACCTTTGCAACTTTGCCAAAGCTCAGAGTTCACTTTTTAAGTTTTTAACTCATTT	55340	Hs.647087	GO:0005525|GO:0000166|GO:0030217|GO:0043029|GO:0043011|GO:0050868|GO:0043066|GO:0032689|GO:0050995|GO:0045019|GO:0032831|GO:0010524|GO:0045588|GO:0002925|GO:0045838|GO:0002729|GO:0045954|GO:0046902|GO:0001659|GO:0016021|GO:0016020|GO:0005741|GO:0005739	NP_060854	GTPase, IMAP family member 5
ASHG19A3A001072	1722.03	539.743	1307.26	623.642	1118.88	1104.58	1161.33	316.494	2296.15	833.65	2358.78	1019.2	10.6193	9.12698	10.4353	9.70004	10.1384	9.92717	10.2941	9.0887	10.699	9.62678	10.9811	9.78717	coding	NM_001018677	FNTA	RefSeq_coding	1509	chr8	+	42911441	42940923		ACTCGCCCTCCTATGTCCTGTACAGGCATTTCCGGAGAGTTCTTTTGAAGTCACTTCAGA
ASHG19A3A000663	77.1027	248.597	39.8891	42.7595	129.968	279.538	97.9772	43.7764	127.342	184.003	133.679	143.896	6.1588	7.95884	5.65073	5.75051	7.03546	7.91293	6.69468	6.22522	6.46881	7.38949	6.99985	6.76513	coding	NM_001001549	GRB10	RefSeq_coding	4575	chr7	-	50657759	50800050		AGCAGTCAAATGGCAGTCAAACCCAGCTTTTGCAGGAACCCAGACACCTGCAGCTGCTGG	2887	Hs.164060	GO:0005070|GO:0005158|GO:0005158|GO:0005515|GO:0008286|GO:0048009|GO:0030178|GO:0046325|GO:0045719|GO:0046627|GO:0042326|GO:0042327|GO:0030949|GO:0032868|GO:0007165|GO:0005737|GO:0005829|GO:0005886	NP_005302	Growth factor receptor-bound protein 10
ASHG19A3A045419	4114.24	906.828	5896.06	4479.96	4223.47	4963.41	2806.96	2407.4	4239.41	1738.56	4743.98	2190.49	11.9246	9.91347	12.6523	12.3059	12.1737	12.0876	11.6463	11.7064	11.6825	10.6731	12.0567	10.9028	coding	NM_181843	NUDT8	RefSeq_coding	834	chr11	-	67395409	67397401		TGGCTTCACCCTGTCAGGCCAGCTCCACTCCAGGACTGAATAAAGGTCTTTGACAGCTCT	254552	Hs.433329	GO:0016787|GO:0046872|GO:0005739	NP_862826	Nudix (nucleoside diphosphate linked moiety X)-type motif 8
ASHG19A3A019987	432.958	1321.9	174.938	4269.55	124.922	3035.8	219.824	506.523	259.736	1275.54	194.884	1203.66	8.62372	10.4442	7.64214	12.2415	6.98281	11.3804	7.8559	9.72889	7.43945	10.2391	7.4865	10.0456	coding	NM_001014440	ODF3B	RefSeq_coding	970	chr22	-	50968837	50971008		CCAACTTGCTCCATCTACGGCCGCAGAGCGGCTGGCAGTTTCTTCGAGGACCTCAGCAAG	440836	Hs.531314		NP_001014440	Outer dense fiber of sperm tails 3B
ASHG19A3A019328	145.824	131.708	115.988	130.413	152.341	164.448	126.203	118.58	279.817	146.295	168.562	197.922	7.07745	6.96255	7.09171	7.48474	7.2495	7.13578	7.06309	7.70077	7.54249	7.0528	7.29869	7.25676	coding	NM_020132	AGPAT3	RefSeq_coding	6555	chr21	+	45285115	45407474		TGTCCAGCCGGAAGCCCTGAGGGCAGCTGTTCCCACTGGCTCTGCTGACCTTGTGCCTTG	56894	Hs.248785	GO:0003841|GO:0008415|GO:0016740|GO:0008152|GO:0008654|GO:0005783|GO:0005789|GO:0016021|GO:0005886	NP_064517	1-acylglycerol-3-phosphate O-acyltransferase 3
ASHG19A3A024911	88.8847	88.7457	66.9509	57.397	89.5132	133.344	81.1703	41.6279	85.7506	127.116	68.1991	60.2075	6.36547	6.35778	6.33465	6.21337	6.50965	6.82949	6.42324	6.1524	5.93376	6.85574	6.11522	5.41373	coding	NM_001128424	FAM198B	RefSeq_coding	4809	chr4	-	159045732	159094202	NM_016613,	CATCATTCTTTGGGATGCATCTTTATCTTCAGCAAGTAATGACACCCATTCTTCTGTTAA	51313	Hs.567498	GO:0005794|GO:0000139|GO:0016021|GO:0016020	NP_057697	Family with sequence similarity 198, member B
ASHG19A3A046721	2309.34	16588.5	1283	684.522	1401.01	3836.77	2311.1	4274.04	2562.62	15683.2	5063.28	6766.8	11.0516	13.7866	10.4097	9.82203	10.4855	11.7079	11.3504	12.4516	10.8719	13.8048	12.1367	12.4765	coding	NM_000803	FOLR2	RefSeq_coding	1145	chr11	+	71927818	71932993		GCTGCTCCATGGTGGGGCCAAGAGTCACTTCTAATAAACAGACTGTTTTCTAATAATTCC	2350	Hs.433159	GO:0005542|GO:0004872|GO:0015884|GO:0031225|GO:0005576|GO:0005624|GO:0005886	NP_001107008	Folate receptor 2 (fetal)
ASHG19A3A017100	161.669	99.4338	129.891	88.3244	109.351	112.839	99.9976	72.3273	237.631	109.9	148.904	135.621	7.22651	6.53386	7.25114	6.89113	6.79086	6.58865	6.72476	6.97482	7.3205	6.64735	7.14141	6.67896	coding	NM_031313	ALPPL2	RefSeq_coding	2499	chr2	+	233271551	233275422		CTGGGCCTCCATTCTTCTGGGAAACACAAAGCAATAATAAAAGGAAGTGTTAGACAATGT	251	Hs.333509	GO:0004035|GO:0016787|GO:0046872|GO:0016310|GO:0031225|GO:0016020|GO:0005886	NP_112603	Alkaline phosphatase, placental-like 2
ASHG19A3A022969	232.012	197.783	125.767	291.799	325.598	499.609	153.471	121.919	301.962	268.548	237.807	224.218	7.73037	7.60968	7.20337	8.67032	8.34784	8.77481	7.33891	7.7409	7.65135	7.9523	7.76453	7.44797	coding	NM_007072	HHLA2	RefSeq_coding	2689	chr3	+	108021331	108097125		TTTTGGTGCCCTCTGCGATTTTGGCAGCTTTTCTGCTGATTTGGAGCGTAAAATGTTGCA	11148	Hs.252351	GO:0003674|GO:0008150|GO:0005575|GO:0016021|GO:0016020	NP_009003	HERV-H LTR-associating 2
ASHG19A3A050885	5319.91	873.499	3443.14	1655.76	2522.25	2517.31	2049.29	609.817	4749.65	1285.46	3888.86	1534.25	12.3059	9.85578	11.8613	11.0092	11.3779	11.1093	11.169	9.9777	11.8594	10.2525	11.7596	10.4049	coding	NM_145113	MAX	RefSeq_coding	2169	chr14	-	65541844	65569227		TCACTTCTCTTCCTCCCTCATGGAAGATGCAAGTAAAAGGAAATGCAAGTAACCACCTGG	4149	Hs.285354	GO:0003677|GO:0005515|GO:0003700|GO:0003713|GO:0003712|GO:0030528|GO:0006366|GO:0071339|GO:0005737|GO:0005730|GO:0005634	NP_932061	MYC associated factor X
ASHG19A3A041239	1291.64	2357.44	682.892	245.285	1453.33	1842.45	1548.26	417.977	1988.76	2359.03	1242.52	1214.79	10.2013	11.2526	9.51432	8.42042	10.5388	10.6697	10.7312	9.46727	10.4594	11.093	10.0009	10.0574	coding	NM_003022	SH3BGRL	RefSeq_coding	2090	chrX	+	80457302	80554042		TTCTTTGAAGCCAGAGAAAATAATGCAGTGTATGCCTTCTTAGGCTTGACAGCCCCACCT	6451	Hs.108029	GO:0017124|GO:0005070|GO:0005737|GO:0005634	NP_003013	SH3 domain binding glutamic acid-rich protein like
ASHG19A3A045839	2230.05	10390.9	1802.42	3779.66	1635.15	5575.42	4140.28	4687.27	882.375	15126.4	2673.48	1097.19	11.0066	13.2303	10.9062	12.0718	10.7173	12.2495	12.261	12.5682	9.19478	13.7477	11.1637	9.9019	coding	NM_019055	ROBO4	RefSeq_coding	3859	chr11	-	124754114	124767831		CCTCGTACTGTTGTCACTATGAGCTTAAGAAATTTGATACCATAAAATGGTAAAGACTTG	54538	Hs.524121	GO:0004872|GO:0001525|GO:0030154|GO:0007275|GO:0030336|GO:0030334|GO:0009897|GO:0016021	NP_061928	Roundabout homolog 4, magic roundabout (Drosophila)
ASHG19A3A002647	15733.1	7118.8	25016.5	10665.9	20113.1	9583.46	15505.2	9551.8	34118.5	10567.1	30082.7	11821	13.9896	12.7805	14.9663	13.5016	14.5875	13.0548	14.2764	13.3992	15.1009	13.248	15.1392	13.2688	coding	NM_001143919	LTB4R	RefSeq_coding	2723	chr14	+	24780704	24787241		CTGTCCCTTTCCACCCCCCACCCACCCTCCAGAGGTCCTCCCGACGGCCATGAACACTAC	1241	Hs.567248	GO:0001632|GO:0004974|GO:0000166|GO:0004872|GO:0007186|GO:0007200|GO:0006928|GO:0006955|GO:0006954|GO:0006936|GO:0005887|GO:0005886|GO:0005886	NP_858043	Leukotriene B4 receptor
[truncated: 12,891 more rows]
