# Supplementary material for: LncRNAs Expression Signatures of Renal Clear Cell Carcinoma Revealed by Microarray
Source: PLoS One. 2012 Aug 6;7(8):e42377. doi: 10.1371/journal.pone.0042377 (PMC3412851; doi:10.1371/journal.pone.0042377)
Supplement: Table S16 — Primer Catalog. (XLSX) [file pone.0042377.s016.xlsx]

## Sheet: Sheet1
GAPDH	F	tgggtgtgaaccatgagaag	R	gtgtcgctgttgaagtcaga
AK123483.1	F	ctcaggcaagaaataaccaagc	R	agcacacaaagggaacaagaag
ENST00000456816	F	cacctgtttatcggagttgaca	R	cgttctgtgctttctgttctca
X91348.1	F	cagccaacttcttcaaaccac	R	tagccagtgtcatcagggtgt
uc002the.2	F	tcactcgctgaaaaggacact	R	gtggggagatagcacactgag
ENST00000460407	F	gctatgtgactgttgaccctttc	R	ggctcctggctgtttagtttt
uc003lbm.4	F	cgcctgctgacttccttactt	R	cagtgccaaccttccaaag
BC029135.1	F	catctttcccctgtcatctgt	R	tcacactttctggtttgcttct
ENST00000423200.1	F	tgtgctgttattgtggttgtga	R	gccttctcatactttgccattc
NR_002798	F	gcctccacaaaacttcactgt	R	acccttgattccaccaatagtc
ASHG19A3_F1	AK123483.1
A022109_F1	ENST00000456816
A020072_F1	X91348.1
A014202_F1	uc002the.2
A023407_F1	ENST00000460407
A027438_F1	uc003lbm.4
A043868_F1	BC029135.1
A026346_F1	ENST00000423200.1
A007106_F1	NR_002798
